# Supplementary material for: Benchmarking small-variant genotyping in polyploids
Source: Genome Res. 2022 Feb;32(2):403–8. doi: 10.1101/gr.275579.121 (PMC8805713; doi:10.1101/gr.275579.121)
Supplement: Supplemental Material [file supp_gr.275579.121_Supplemental_Table_S1.xlsx]

## Sheet: Supplemental Table 1
Supplemental Table S1: Performance metrics on diploid and synthetic polyploid datasets.
Sample	Library	Depth	Filtered	Match	Caller	Stratification	True-pos-baseline	True-pos-call	False-pos	False-neg	Precision	Sensitivity	F-measure	ploidy
HG002+HG003+HG004	NovaSeq	10	TRUE	GT	Octopus	genome	2372631	2380329	1536435	2573943	0.6077	0.4797	0.5361	6
HG002+HG003+HG004	NovaSeq	10	TRUE	GT	GATK4	genome	2279619	2279443	1721607	2669439	0.5697	0.4606	0.5094	6
HG002+HG003+HG004	NovaSeq	10	TRUE	GT	FreeBayes	genome	2046987	2013592	1583021	2904068	0.5599	0.4134	0.4756	6
HG002+HG003+HG004	NovaSeq	10	TRUE	GT	Octopus	alldifficult	493945	501371	374880	637673	0.5722	0.4365	0.4952	6
HG002+HG003+HG004	NovaSeq	10	TRUE	GT	GATK4	alldifficult	452394	452310	387649	680368	0.5385	0.3994	0.4586	6
HG002+HG003+HG004	NovaSeq	10	TRUE	GT	FreeBayes	alldifficult	404400	393852	341774	729888	0.5354	0.3565	0.428	6
HG002+HG003+HG004	NovaSeq	10	TRUE	GT	Octopus	alllowmapandsegdup	137108	137204	93976	198925	0.5935	0.408	0.4836	6
HG002+HG003+HG004	NovaSeq	10	TRUE	GT	GATK4	alllowmapandsegdup	121105	121143	106277	214962	0.5327	0.3604	0.4299	6
HG002+HG003+HG004	NovaSeq	10	TRUE	GT	FreeBayes	alllowmapandsegdup	117479	114088	99204	218690	0.5349	0.3495	0.4227	6
HG002+HG003+HG004	NovaSeq	10	TRUE	GT	Octopus	notinalldifficult	1878773	1879239	1161645	1936574	0.618	0.4924	0.5481	6
HG002+HG003+HG004	NovaSeq	10	TRUE	GT	GATK4	notinalldifficult	1827330	1827418	1334146	1989357	0.578	0.4788	0.5237	6
HG002+HG003+HG004	NovaSeq	10	TRUE	GT	FreeBayes	notinalldifficult	1642569	1620142	1266910	2174590	0.5612	0.4303	0.4871	6
HG002+HG003+HG004	NovaSeq	10	TRUE	GT	Octopus	notinalllowmapandsegdup	2235375	2243063	1442426	2374955	0.6086	0.4849	0.5397	6
HG002+HG003+HG004	NovaSeq	10	TRUE	GT	GATK4	notinalllowmapandsegdup	2158384	2158243	1615284	2454396	0.5719	0.4679	0.5147	6
HG002+HG003+HG004	NovaSeq	10	TRUE	GT	FreeBayes	notinalllowmapandsegdup	1929391	1899502	1484326	2685284	0.5613	0.4181	0.4792	6
HG002+HG003+HG004	NovaSeq	10	TRUE	GT	Octopus	AllTandemRepeatsandHomopolymers	224602	231979	200745	303818	0.5361	0.425	0.4742	6
HG002+HG003+HG004	NovaSeq	10	TRUE	GT	GATK4	AllTandemRepeatsandHomopolymers	203022	202908	187932	326457	0.5192	0.3834	0.4411	6
HG002+HG003+HG004	NovaSeq	10	TRUE	GT	FreeBayes	AllTandemRepeatsandHomopolymers	171518	166444	156393	359310	0.5156	0.3231	0.3973	6
HG002+HG003+HG004	NovaSeq	10	TRUE	GT	Octopus	notinAllTandemRepeatsandHomopolymers	2148241	2148687	1335824	2270515	0.6166	0.4862	0.5437	6
HG002+HG003+HG004	NovaSeq	10	TRUE	GT	GATK4	notinAllTandemRepeatsandHomopolymers	2076804	2076857	1533925	2343378	0.5752	0.4698	0.5172	6
HG002+HG003+HG004	NovaSeq	10	TRUE	GT	FreeBayes	notinAllTandemRepeatsandHomopolymers	1875550	1847565	1454519	2545280	0.5595	0.4243	0.4826	6
HG002+HG003+HG004	NovaSeq	20	TRUE	GT	Octopus	genome	3376997	3393623	1173478	1568211	0.7431	0.6829	0.7117	6
HG002+HG003+HG004	NovaSeq	20	TRUE	GT	GATK4	genome	3117746	3117382	1432668	1830176	0.6851	0.6301	0.6565	6
HG002+HG003+HG004	NovaSeq	20	TRUE	GT	FreeBayes	genome	2990627	2938102	1487054	1960046	0.664	0.6041	0.6326	6
HG002+HG003+HG004	NovaSeq	20	TRUE	GT	Octopus	alldifficult	717244	732950	308434	412224	0.7038	0.635	0.6677	6
HG002+HG003+HG004	NovaSeq	20	TRUE	GT	GATK4	alldifficult	637343	637105	348198	494408	0.6466	0.5631	0.602	6
HG002+HG003+HG004	NovaSeq	20	TRUE	GT	FreeBayes	alldifficult	604351	586770	344606	529576	0.63	0.533	0.5774	6
HG002+HG003+HG004	NovaSeq	20	TRUE	GT	Octopus	alllowmapandsegdup	198759	198921	83629	137254	0.704	0.5915	0.6429	6
HG002+HG003+HG004	NovaSeq	20	TRUE	GT	GATK4	alllowmapandsegdup	167200	167240	99831	168846	0.6262	0.4976	0.5545	6
HG002+HG003+HG004	NovaSeq	20	TRUE	GT	FreeBayes	alllowmapandsegdup	174673	169375	103115	161518	0.6216	0.5196	0.566	6
HG002+HG003+HG004	NovaSeq	20	TRUE	GT	Octopus	notinalldifficult	2659988	2661223	865174	1156143	0.7547	0.697	0.7247	6
HG002+HG003+HG004	NovaSeq	20	TRUE	GT	GATK4	notinalldifficult	2480616	2480730	1084617	1335946	0.6958	0.65	0.6721	6
HG002+HG003+HG004	NovaSeq	20	TRUE	GT	FreeBayes	notinalldifficult	2386416	2352112	1169289	1430723	0.6679	0.6252	0.6459	6
HG002+HG003+HG004	NovaSeq	20	TRUE	GT	Octopus	notinalllowmapandsegdup	3178076	3194657	1089836	1430909	0.7456	0.6895	0.7165	6
HG002+HG003+HG004	NovaSeq	20	TRUE	GT	GATK4	notinalllowmapandsegdup	2950401	2950087	1332783	1661264	0.6888	0.6398	0.6634	6
HG002+HG003+HG004	NovaSeq	20	TRUE	GT	FreeBayes	notinalllowmapandsegdup	2815812	2768748	1384504	1798459	0.6666	0.6102	0.6372	6
HG002+HG003+HG004	NovaSeq	20	TRUE	GT	Octopus	AllTandemRepeatsandHomopolymers	331081	346642	165401	195234	0.677	0.6291	0.6521	6
HG002+HG003+HG004	NovaSeq	20	TRUE	GT	GATK4	AllTandemRepeatsandHomopolymers	296023	295764	172034	232504	0.6322	0.5601	0.594	6
HG002+HG003+HG004	NovaSeq	20	TRUE	GT	FreeBayes	AllTandemRepeatsandHomopolymers	262659	253525	162506	267815	0.6094	0.4951	0.5464	6
HG002+HG003+HG004	NovaSeq	20	TRUE	GT	Octopus	notinAllTandemRepeatsandHomopolymers	3046295	3047581	1008233	1373199	0.7514	0.6893	0.719	6
HG002+HG003+HG004	NovaSeq	20	TRUE	GT	GATK4	notinAllTandemRepeatsandHomopolymers	2822067	2822126	1260834	1597929	0.6912	0.6385	0.6638	6
HG002+HG003+HG004	NovaSeq	20	TRUE	GT	FreeBayes	notinAllTandemRepeatsandHomopolymers	2728237	2685379	1353640	1692565	0.6649	0.6171	0.6401	6
HG002+HG003+HG004	NovaSeq	30	TRUE	GT	Octopus	genome	3934882	3956682	873821	1009014	0.8191	0.7959	0.8073	6
HG002+HG003+HG004	NovaSeq	30	TRUE	GT	GATK4	genome	3550580	3550097	1146315	1396784	0.7559	0.7177	0.7363	6
HG002+HG003+HG004	NovaSeq	30	TRUE	GT	FreeBayes	genome	3493383	3429414	1161805	1457086	0.747	0.7057	0.7257	6
HG002+HG003+HG004	NovaSeq	30	TRUE	GT	Octopus	alldifficult	841041	861935	245624	287350	0.7782	0.7453	0.7614	6
HG002+HG003+HG004	NovaSeq	30	TRUE	GT	GATK4	alldifficult	736615	736273	290047	394679	0.7174	0.6511	0.6827	6
HG002+HG003+HG004	NovaSeq	30	TRUE	GT	FreeBayes	alldifficult	715353	693363	290363	418379	0.7048	0.631	0.6659	6
HG002+HG003+HG004	NovaSeq	30	TRUE	GT	Octopus	alllowmapandsegdup	233487	233690	74184	102477	0.759	0.695	0.7256	6
HG002+HG003+HG004	NovaSeq	30	TRUE	GT	GATK4	alllowmapandsegdup	190392	190428	86279	145619	0.6882	0.5666	0.6215	6
HG002+HG003+HG004	NovaSeq	30	TRUE	GT	FreeBayes	alllowmapandsegdup	205278	198865	91623	130912	0.6846	0.6106	0.6455	6
HG002+HG003+HG004	NovaSeq	30	TRUE	GT	Octopus	notinalldifficult	3094133	3095431	628339	721764	0.8313	0.8109	0.8209	6
HG002+HG003+HG004	NovaSeq	30	TRUE	GT	GATK4	notinalldifficult	2814190	2814316	856397	1002271	0.7667	0.7374	0.7518	6
HG002+HG003+HG004	NovaSeq	30	TRUE	GT	FreeBayes	notinalldifficult	2778232	2737055	893590	1038898	0.7539	0.7278	0.7406	6
HG002+HG003+HG004	NovaSeq	30	TRUE	GT	Octopus	notinalllowmapandsegdup	3701222	3722950	799650	906498	0.8232	0.8033	0.8131	6
HG002+HG003+HG004	NovaSeq	30	TRUE	GT	GATK4	notinalllowmapandsegdup	3360019	3359586	1059998	1251122	0.7602	0.7287	0.7441	6
HG002+HG003+HG004	NovaSeq	30	TRUE	GT	FreeBayes	notinalllowmapandsegdup	3287956	3230596	1070687	1326112	0.7511	0.7126	0.7313	6
HG002+HG003+HG004	NovaSeq	30	TRUE	GT	Octopus	AllTandemRepeatsandHomopolymers	390633	411376	128146	134634	0.7625	0.7437	0.753	6
HG002+HG003+HG004	NovaSeq	30	TRUE	GT	GATK4	AllTandemRepeatsandHomopolymers	348960	348593	143029	179144	0.7091	0.6608	0.6841	6
HG002+HG003+HG004	NovaSeq	30	TRUE	GT	FreeBayes	AllTandemRepeatsandHomopolymers	315946	304119	137203	214342	0.6891	0.5958	0.6391	6
HG002+HG003+HG004	NovaSeq	30	TRUE	GT	Octopus	notinAllTandemRepeatsandHomopolymers	3544695	3546048	745837	874536	0.8262	0.8021	0.814	6
HG002+HG003+HG004	NovaSeq	30	TRUE	GT	GATK4	notinAllTandemRepeatsandHomopolymers	3202002	3202077	1003447	1217859	0.7614	0.7245	0.7425	6
HG002+HG003+HG004	NovaSeq	30	TRUE	GT	FreeBayes	notinAllTandemRepeatsandHomopolymers	3177783	3126321	1048628	1243003	0.7488	0.7188	0.7335	6
HG002+HG003+HG004	NovaSeq	40	TRUE	GT	Octopus	genome	4237092	4262196	659018	706145	0.8661	0.8571	0.8616	6
HG002+HG003+HG004	NovaSeq	40	TRUE	GT	GATK4	genome	3830804	3830223	929911	1116323	0.8046	0.7743	0.7892	6
HG002+HG003+HG004	NovaSeq	40	TRUE	GT	FreeBayes	genome	3823222	3751595	947201	1127095	0.7984	0.7723	0.7852	6
HG002+HG003+HG004	NovaSeq	40	TRUE	GT	Octopus	alldifficult	910676	934908	199692	217153	0.824	0.8075	0.8156	6
HG002+HG003+HG004	NovaSeq	40	TRUE	GT	GATK4	alldifficult	798459	798047	244161	332632	0.7657	0.7059	0.7346	6
HG002+HG003+HG004	NovaSeq	40	TRUE	GT	FreeBayes	alldifficult	791598	766531	250781	341988	0.7535	0.6983	0.7249	6
HG002+HG003+HG004	NovaSeq	40	TRUE	GT	Octopus	alllowmapandsegdup	252581	252814	67395	83353	0.7895	0.7519	0.7702	6
HG002+HG003+HG004	NovaSeq	40	TRUE	GT	GATK4	alllowmapandsegdup	204528	204579	75762	131464	0.7298	0.6087	0.6638	6
HG002+HG003+HG004	NovaSeq	40	TRUE	GT	FreeBayes	alllowmapandsegdup	225030	217996	83435	111155	0.7232	0.6694	0.6952	6
HG002+HG003+HG004	NovaSeq	40	TRUE	GT	Octopus	notinalldifficult	3326718	3328038	459484	489082	0.8787	0.8718	0.8752	6
HG002+HG003+HG004	NovaSeq	40	TRUE	GT	GATK4	notinalldifficult	3032610	3032751	685859	783817	0.8156	0.7946	0.805	6
HG002+HG003+HG004	NovaSeq	40	TRUE	GT	FreeBayes	notinalldifficult	3031867	2986198	714610	785258	0.8069	0.7943	0.8005	6
HG002+HG003+HG004	NovaSeq	40	TRUE	GT	Octopus	notinalllowmapandsegdup	3984315	4009335	591668	622776	0.8714	0.8648	0.8681	6
HG002+HG003+HG004	NovaSeq	40	TRUE	GT	GATK4	notinalllowmapandsegdup	3626105	3625580	854113	984818	0.8093	0.7864	0.7977	6
HG002+HG003+HG004	NovaSeq	40	TRUE	GT	FreeBayes	notinalllowmapandsegdup	3598040	3533669	864216	1015881	0.8035	0.7798	0.7915	6
HG002+HG003+HG004	NovaSeq	40	TRUE	GT	Octopus	AllTandemRepeatsandHomopolymers	425458	449548	100285	99269	0.8176	0.8108	0.8142	6
HG002+HG003+HG004	NovaSeq	40	TRUE	GT	GATK4	AllTandemRepeatsandHomopolymers	382108	381661	118710	145823	0.7628	0.7238	0.7428	6
HG002+HG003+HG004	NovaSeq	40	TRUE	GT	FreeBayes	AllTandemRepeatsandHomopolymers	355145	341178	117761	175002	0.7434	0.6699	0.7047	6
HG002+HG003+HG004	NovaSeq	40	TRUE	GT	Octopus	notinAllTandemRepeatsandHomopolymers	3812108	3813462	558888	607004	0.8722	0.8626	0.8674	6
HG002+HG003+HG004	NovaSeq	40	TRUE	GT	GATK4	notinAllTandemRepeatsandHomopolymers	3449117	3449196	811350	970680	0.8096	0.7804	0.7947	6
HG002+HG003+HG004	NovaSeq	40	TRUE	GT	FreeBayes	notinAllTandemRepeatsandHomopolymers	3468472	3411553	849186	952304	0.8007	0.7846	0.7926	6
HG002+HG003+HG004	NovaSeq	50	TRUE	GT	Octopus	genome	4414100	4441365	512817	528653	0.8965	0.893	0.8948	6
HG002+HG003+HG004	NovaSeq	50	TRUE	GT	GATK4	genome	4033770	4033144	763640	913211	0.8408	0.8154	0.8279	6
HG002+HG003+HG004	NovaSeq	50	TRUE	GT	FreeBayes	genome	4036654	3959877	800089	913487	0.8319	0.8155	0.8236	6
HG002+HG003+HG004	NovaSeq	50	TRUE	GT	Octopus	alldifficult	952602	979087	167783	174850	0.8537	0.8449	0.8493	6
HG002+HG003+HG004	NovaSeq	50	TRUE	GT	GATK4	alldifficult	843165	842714	208212	287770	0.8019	0.7455	0.7727	6
HG002+HG003+HG004	NovaSeq	50	TRUE	GT	FreeBayes	alldifficult	843306	815972	223411	290140	0.7851	0.744	0.764	6
HG002+HG003+HG004	NovaSeq	50	TRUE	GT	Octopus	alllowmapandsegdup	263441	263702	62889	72504	0.8074	0.7842	0.7956	6
HG002+HG003+HG004	NovaSeq	50	TRUE	GT	GATK4	alllowmapandsegdup	214879	214922	67977	121124	0.7597	0.6395	0.6945	6
HG002+HG003+HG004	NovaSeq	50	TRUE	GT	FreeBayes	alllowmapandsegdup	237744	230259	77848	98428	0.7473	0.7072	0.7267	6
HG002+HG003+HG004	NovaSeq	50	TRUE	GT	Octopus	notinalldifficult	3461831	3463068	345172	353862	0.9094	0.9073	0.9083	6
HG002+HG003+HG004	NovaSeq	50	TRUE	GT	GATK4	notinalldifficult	3190911	3191063	555491	625526	0.8517	0.8361	0.8438	6
HG002+HG003+HG004	NovaSeq	50	TRUE	GT	FreeBayes	notinalldifficult	3193634	3145121	592137	623454	0.8416	0.8367	0.8391	6
HG002+HG003+HG004	NovaSeq	50	TRUE	GT	Octopus	notinalllowmapandsegdup	4150465	4177625	449975	456131	0.9028	0.901	0.9019	6
HG002+HG003+HG004	NovaSeq	50	TRUE	GT	GATK4	notinalllowmapandsegdup	3818718	3818152	695624	792049	0.8459	0.8282	0.837	6
HG002+HG003+HG004	NovaSeq	50	TRUE	GT	FreeBayes	notinalllowmapandsegdup	3798754	3729704	722648	815004	0.8377	0.8234	0.8305	6
HG002+HG003+HG004	NovaSeq	50	TRUE	GT	Octopus	AllTandemRepeatsandHomopolymers	447316	473650	80625	77065	0.8545	0.853	0.8538	6
HG002+HG003+HG004	NovaSeq	50	TRUE	GT	GATK4	AllTandemRepeatsandHomopolymers	405654	405165	99453	122121	0.8029	0.7686	0.7854	6
HG002+HG003+HG004	NovaSeq	50	TRUE	GT	FreeBayes	AllTandemRepeatsandHomopolymers	383099	367567	103963	146931	0.7795	0.7228	0.7501	6
HG002+HG003+HG004	NovaSeq	50	TRUE	GT	Octopus	notinAllTandemRepeatsandHomopolymers	3967298	3968573	432326	451676	0.9018	0.8978	0.8998	6
HG002+HG003+HG004	NovaSeq	50	TRUE	GT	GATK4	notinAllTandemRepeatsandHomopolymers	3628598	3628687	664279	791209	0.8453	0.821	0.8329	6
HG002+HG003+HG004	NovaSeq	50	TRUE	GT	FreeBayes	notinAllTandemRepeatsandHomopolymers	3654004	3593530	712885	766711	0.8345	0.8266	0.8305	6
HG002+HG003+HG004	NovaSeq	60	TRUE	GT	Octopus	genome	4527476	4556118	411514	414712	0.9172	0.9161	0.9166	6
HG002+HG003+HG004	NovaSeq	60	TRUE	GT	GATK4	genome	4183677	4183008	637739	763219	0.8677	0.8457	0.8566	6
HG002+HG003+HG004	NovaSeq	60	TRUE	GT	FreeBayes	genome	4186242	4105955	685351	763816	0.857	0.8457	0.8513	6
HG002+HG003+HG004	NovaSeq	60	TRUE	GT	Octopus	alldifficult	979957	1007900	145252	147201	0.874	0.8694	0.8717	6
HG002+HG003+HG004	NovaSeq	60	TRUE	GT	GATK4	alldifficult	876534	876045	180230	254334	0.8294	0.7751	0.8013	6
HG002+HG003+HG004	NovaSeq	60	TRUE	GT	FreeBayes	alldifficult	879565	850713	201659	253794	0.8084	0.7761	0.7919	6
HG002+HG003+HG004	NovaSeq	60	TRUE	GT	Octopus	alllowmapandsegdup	270274	270541	60177	65625	0.818	0.8046	0.8113	6
HG002+HG003+HG004	NovaSeq	60	TRUE	GT	GATK4	alllowmapandsegdup	222717	222762	61594	113271	0.7834	0.6629	0.7181	6
HG002+HG003+HG004	NovaSeq	60	TRUE	GT	FreeBayes	alllowmapandsegdup	246259	238478	73311	89903	0.7649	0.7326	0.7484	6
HG002+HG003+HG004	NovaSeq	60	TRUE	GT	Octopus	notinalldifficult	3547868	3549026	266365	267553	0.9302	0.9299	0.93	6
HG002+HG003+HG004	NovaSeq	60	TRUE	GT	GATK4	notinalldifficult	3307445	3307601	457584	508974	0.8785	0.8666	0.8725	6
HG002+HG003+HG004	NovaSeq	60	TRUE	GT	FreeBayes	notinalldifficult	3306995	3256532	497044	510098	0.8676	0.8664	0.867	6
HG002+HG003+HG004	NovaSeq	60	TRUE	GT	Octopus	notinalllowmapandsegdup	4257008	4285543	351389	349069	0.9242	0.9242	0.9242	6
HG002+HG003+HG004	NovaSeq	60	TRUE	GT	GATK4	notinalllowmapandsegdup	3960787	3960182	576111	649910	0.873	0.859	0.866	6
HG002+HG003+HG004	NovaSeq	60	TRUE	GT	FreeBayes	notinalllowmapandsegdup	3939824	3867568	612407	673861	0.8633	0.8539	0.8586	6
HG002+HG003+HG004	NovaSeq	60	TRUE	GT	Octopus	AllTandemRepeatsandHomopolymers	462033	489847	66225	62107	0.8809	0.8815	0.8812	6
HG002+HG003+HG004	NovaSeq	60	TRUE	GT	GATK4	AllTandemRepeatsandHomopolymers	423168	422643	84753	104574	0.833	0.8018	0.8171	6
HG002+HG003+HG004	NovaSeq	60	TRUE	GT	FreeBayes	AllTandemRepeatsandHomopolymers	402855	386278	93092	127102	0.8058	0.7602	0.7823	6
HG002+HG003+HG004	NovaSeq	60	TRUE	GT	Octopus	notinAllTandemRepeatsandHomopolymers	4065984	4067158	345377	352665	0.9217	0.9202	0.921	6
HG002+HG003+HG004	NovaSeq	60	TRUE	GT	GATK4	notinAllTandemRepeatsandHomopolymers	3760985	3761072	553087	658770	0.8718	0.8509	0.8612	6
HG002+HG003+HG004	NovaSeq	60	TRUE	GT	FreeBayes	notinAllTandemRepeatsandHomopolymers	3783854	3720951	606742	636852	0.8598	0.8559	0.8579	6
HG002+HG003+HG004	NovaSeq	70	TRUE	GT	Octopus	genome	4607000	4636701	338060	335263	0.932	0.9322	0.9321	6
HG002+HG003+HG004	NovaSeq	70	TRUE	GT	GATK4	genome	4298088	4297401	539610	648717	0.8884	0.8689	0.8785	6
HG002+HG003+HG004	NovaSeq	70	TRUE	GT	FreeBayes	genome	4297253	4214286	595803	652755	0.8761	0.8681	0.8721	6
HG002+HG003+HG004	NovaSeq	70	TRUE	GT	Octopus	alldifficult	999759	1028816	128639	127339	0.8889	0.887	0.8879	6
HG002+HG003+HG004	NovaSeq	70	TRUE	GT	GATK4	alldifficult	902445	901958	158170	228347	0.8508	0.7981	0.8236	6
HG002+HG003+HG004	NovaSeq	70	TRUE	GT	FreeBayes	alldifficult	906967	876839	184109	226336	0.8265	0.8003	0.8132	6
HG002+HG003+HG004	NovaSeq	70	TRUE	GT	Octopus	alllowmapandsegdup	275247	275514	58142	60655	0.8257	0.8194	0.8226	6
HG002+HG003+HG004	NovaSeq	70	TRUE	GT	GATK4	alllowmapandsegdup	228744	228795	56674	107240	0.8015	0.6808	0.7362	6
HG002+HG003+HG004	NovaSeq	70	TRUE	GT	FreeBayes	alllowmapandsegdup	252753	244739	70039	83411	0.7775	0.7519	0.7645	6
HG002+HG003+HG004	NovaSeq	70	TRUE	GT	Octopus	notinalldifficult	3607593	3608713	209553	207964	0.9451	0.9455	0.9453	6
HG002+HG003+HG004	NovaSeq	70	TRUE	GT	GATK4	notinalldifficult	3395982	3396149	381488	420422	0.899	0.8898	0.8944	6
HG002+HG003+HG004	NovaSeq	70	TRUE	GT	FreeBayes	notinalldifficult	3390612	3338776	423244	426485	0.8875	0.8883	0.8879	6
HG002+HG003+HG004	NovaSeq	70	TRUE	GT	Octopus	notinalllowmapandsegdup	4331556	4361144	279987	274593	0.9397	0.9404	0.94	6
HG002+HG003+HG004	NovaSeq	70	TRUE	GT	GATK4	notinalllowmapandsegdup	4069165	4068544	482909	541445	0.8939	0.8826	0.8882	6
HG002+HG003+HG004	NovaSeq	70	TRUE	GT	FreeBayes	notinalllowmapandsegdup	4044336	3969638	526095	569297	0.883	0.8766	0.8798	6
HG002+HG003+HG004	NovaSeq	70	TRUE	GT	Octopus	AllTandemRepeatsandHomopolymers	472799	501721	55522	51254	0.9004	0.9022	0.9013	6
HG002+HG003+HG004	NovaSeq	70	TRUE	GT	GATK4	AllTandemRepeatsandHomopolymers	437191	436661	72561	90475	0.8575	0.8285	0.8428	6
HG002+HG003+HG004	NovaSeq	70	TRUE	GT	FreeBayes	AllTandemRepeatsandHomopolymers	418220	400772	83419	111679	0.8277	0.7892	0.808	6
HG002+HG003+HG004	NovaSeq	70	TRUE	GT	Octopus	notinAllTandemRepeatsandHomopolymers	4134748	4135880	282642	284064	0.936	0.9357	0.9359	6
HG002+HG003+HG004	NovaSeq	70	TRUE	GT	GATK4	notinAllTandemRepeatsandHomopolymers	3861407	3861500	467128	558333	0.8921	0.8737	0.8828	6
HG002+HG003+HG004	NovaSeq	70	TRUE	GT	FreeBayes	notinAllTandemRepeatsandHomopolymers	3879519	3814834	524863	541193	0.8791	0.8776	0.8783	6
HG002+HG003+HG004	NovaSeq	80	TRUE	GT	Octopus	genome	4664407	4694877	283496	277734	0.9431	0.9438	0.9434	6
HG002+HG003+HG004	NovaSeq	80	TRUE	GT	GATK4	genome	4387302	4386563	462422	559533	0.9046	0.8869	0.8957	6
HG002+HG003+HG004	NovaSeq	80	TRUE	GT	FreeBayes	genome	4381279	4296233	525411	568640	0.891	0.8851	0.8881	6
HG002+HG003+HG004	NovaSeq	80	TRUE	GT	Octopus	alldifficult	1014631	1044541	115507	112383	0.9004	0.9003	0.9004	6
HG002+HG003+HG004	NovaSeq	80	TRUE	GT	GATK4	alldifficult	922858	922318	140764	207960	0.8676	0.8161	0.8411	6
HG002+HG003+HG004	NovaSeq	80	TRUE	GT	FreeBayes	alldifficult	927712	896681	170275	205502	0.8404	0.8187	0.8294	6
HG002+HG003+HG004	NovaSeq	80	TRUE	GT	Octopus	alllowmapandsegdup	279003	279269	56477	56888	0.8318	0.8306	0.8312	6
HG002+HG003+HG004	NovaSeq	80	TRUE	GT	GATK4	alllowmapandsegdup	233287	233335	52977	102703	0.815	0.6943	0.7498	6
HG002+HG003+HG004	NovaSeq	80	TRUE	GT	FreeBayes	alllowmapandsegdup	257487	249309	67401	78672	0.7872	0.766	0.7764	6
HG002+HG003+HG004	NovaSeq	80	TRUE	GT	Octopus	notinalldifficult	3650145	3651188	168101	165373	0.956	0.9567	0.9563	6
HG002+HG003+HG004	NovaSeq	80	TRUE	GT	GATK4	notinalldifficult	3464787	3464953	321699	351621	0.915	0.9079	0.9114	6
HG002+HG003+HG004	NovaSeq	80	TRUE	GT	FreeBayes	notinalldifficult	3453912	3400889	365282	363185	0.903	0.9049	0.9039	6
HG002+HG003+HG004	NovaSeq	80	TRUE	GT	Octopus	notinalllowmapandsegdup	4385207	4415572	227081	220831	0.9511	0.9521	0.9516	6
HG002+HG003+HG004	NovaSeq	80	TRUE	GT	GATK4	notinalllowmapandsegdup	4153841	4153173	409410	456793	0.9103	0.9009	0.9056	6
HG002+HG003+HG004	NovaSeq	80	TRUE	GT	FreeBayes	notinalllowmapandsegdup	4123623	4047020	458324	489926	0.8983	0.8938	0.896	6
HG002+HG003+HG004	NovaSeq	80	TRUE	GT	Octopus	AllTandemRepeatsandHomopolymers	480957	510733	46968	43042	0.9158	0.9179	0.9168	6
HG002+HG003+HG004	NovaSeq	80	TRUE	GT	GATK4	AllTandemRepeatsandHomopolymers	448219	447634	63044	79448	0.8765	0.8494	0.8628	6
HG002+HG003+HG004	NovaSeq	80	TRUE	GT	FreeBayes	AllTandemRepeatsandHomopolymers	429980	411860	75980	99835	0.8443	0.8116	0.8276	6
HG002+HG003+HG004	NovaSeq	80	TRUE	GT	Octopus	notinAllTandemRepeatsandHomopolymers	4184013	4185065	236618	234730	0.9465	0.9469	0.9467	6
HG002+HG003+HG004	NovaSeq	80	TRUE	GT	GATK4	notinAllTandemRepeatsandHomopolymers	3939597	3939687	399451	480172	0.9079	0.8914	0.8996	6
HG002+HG003+HG004	NovaSeq	80	TRUE	GT	FreeBayes	notinAllTandemRepeatsandHomopolymers	3951807	3885699	460390	468900	0.8941	0.8939	0.894	6
HG002+HG003+HG004	NovaSeq	90	TRUE	GT	Octopus	genome	4706736	4737705	242835	235231	0.9512	0.9524	0.9518	6
HG002+HG003+HG004	NovaSeq	90	TRUE	GT	GATK4	genome	4459711	4458983	398527	487010	0.918	0.9015	0.9097	6
HG002+HG003+HG004	NovaSeq	90	TRUE	GT	FreeBayes	genome	4447682	4360984	467850	502201	0.9031	0.8985	0.9008	6
HG002+HG003+HG004	NovaSeq	90	TRUE	GT	Octopus	alldifficult	1025092	1055544	106289	101856	0.9085	0.9096	0.9091	6
HG002+HG003+HG004	NovaSeq	90	TRUE	GT	GATK4	alldifficult	939068	938541	126523	191710	0.8812	0.8305	0.8551	6
HG002+HG003+HG004	NovaSeq	90	TRUE	GT	FreeBayes	alldifficult	944453	912730	158355	188731	0.8522	0.8335	0.8427	6
HG002+HG003+HG004	NovaSeq	90	TRUE	GT	Octopus	alllowmapandsegdup	281556	281823	55356	54303	0.8358	0.8383	0.8371	6
HG002+HG003+HG004	NovaSeq	90	TRUE	GT	GATK4	alllowmapandsegdup	237065	237116	49724	98923	0.8266	0.7056	0.7613	6
HG002+HG003+HG004	NovaSeq	90	TRUE	GT	FreeBayes	alllowmapandsegdup	261606	253275	65039	74553	0.7957	0.7782	0.7869	6
HG002+HG003+HG004	NovaSeq	90	TRUE	GT	Octopus	notinalldifficult	3682023	3683037	136655	133387	0.9642	0.965	0.9646	6
HG002+HG003+HG004	NovaSeq	90	TRUE	GT	GATK4	notinalldifficult	3520988	3521156	272041	295346	0.9283	0.9226	0.9254	6
HG002+HG003+HG004	NovaSeq	90	TRUE	GT	FreeBayes	notinalldifficult	3503588	3449631	318467	313503	0.9155	0.9179	0.9167	6
HG002+HG003+HG004	NovaSeq	90	TRUE	GT	Octopus	notinalllowmapandsegdup	4424982	4455851	187548	180913	0.9596	0.9607	0.9602	6
HG002+HG003+HG004	NovaSeq	90	TRUE	GT	GATK4	notinalllowmapandsegdup	4222459	4221803	348776	388063	0.9237	0.9158	0.9197	6
HG002+HG003+HG004	NovaSeq	90	TRUE	GT	FreeBayes	notinalllowmapandsegdup	4185905	4107805	403116	427608	0.9106	0.9073	0.909	6
HG002+HG003+HG004	NovaSeq	90	TRUE	GT	Octopus	AllTandemRepeatsandHomopolymers	486557	516891	41088	37405	0.9264	0.9286	0.9275	6
HG002+HG003+HG004	NovaSeq	90	TRUE	GT	GATK4	AllTandemRepeatsandHomopolymers	456955	456379	55350	70696	0.8918	0.866	0.8787	6
HG002+HG003+HG004	NovaSeq	90	TRUE	GT	FreeBayes	AllTandemRepeatsandHomopolymers	439064	420485	69614	90713	0.858	0.8288	0.8431	6
HG002+HG003+HG004	NovaSeq	90	TRUE	GT	Octopus	notinAllTandemRepeatsandHomopolymers	4220751	4221756	201833	197855	0.9544	0.9552	0.9548	6
HG002+HG003+HG004	NovaSeq	90	TRUE	GT	GATK4	notinAllTandemRepeatsandHomopolymers	4003275	4003369	343247	416396	0.921	0.9058	0.9133	6
HG002+HG003+HG004	NovaSeq	90	TRUE	GT	FreeBayes	notinAllTandemRepeatsandHomopolymers	4009140	3941863	407947	411567	0.9062	0.9069	0.9066	6
HG002+HG003+HG004	NovaSeq	100	TRUE	GT	Octopus	genome	4739270	4770643	211660	202685	0.9575	0.959	0.9583	6
HG002+HG003+HG004	NovaSeq	100	TRUE	GT	GATK4	genome	4518073	4517317	346665	428661	0.9287	0.9133	0.921	6
HG002+HG003+HG004	NovaSeq	100	TRUE	GT	FreeBayes	genome	4501047	4412984	421003	448836	0.9129	0.9093	0.9111	6
HG002+HG003+HG004	NovaSeq	100	TRUE	GT	Octopus	alldifficult	1033256	1064161	99307	93635	0.9146	0.9169	0.9158	6
HG002+HG003+HG004	NovaSeq	100	TRUE	GT	GATK4	alldifficult	952428	951879	114767	178365	0.8924	0.8423	0.8666	6
HG002+HG003+HG004	NovaSeq	100	TRUE	GT	FreeBayes	alldifficult	957577	925265	148851	175600	0.8614	0.845	0.8532	6
HG002+HG003+HG004	NovaSeq	100	TRUE	GT	Octopus	alllowmapandsegdup	283543	283816	54867	52347	0.838	0.8442	0.8411	6
HG002+HG003+HG004	NovaSeq	100	TRUE	GT	GATK4	alllowmapandsegdup	239992	240046	47185	95994	0.8357	0.7143	0.7703	6
HG002+HG003+HG004	NovaSeq	100	TRUE	GT	FreeBayes	alllowmapandsegdup	264626	256168	63275	71535	0.8019	0.7872	0.7945	6
HG002+HG003+HG004	NovaSeq	100	TRUE	GT	Octopus	notinalldifficult	3706380	3707338	112481	109075	0.9706	0.9714	0.971	6
HG002+HG003+HG004	NovaSeq	100	TRUE	GT	GATK4	notinalldifficult	3565996	3566161	231926	250336	0.9389	0.9344	0.9367	6
HG002+HG003+HG004	NovaSeq	100	TRUE	GT	FreeBayes	notinalldifficult	3543828	3489091	280315	273270	0.9256	0.9284	0.927	6
HG002+HG003+HG004	NovaSeq	100	TRUE	GT	Octopus	notinalllowmapandsegdup	4455527	4486789	156866	150326	0.9662	0.9674	0.9668	6
HG002+HG003+HG004	NovaSeq	100	TRUE	GT	GATK4	notinalllowmapandsegdup	4277897	4277214	299450	332640	0.9346	0.9279	0.9312	6
HG002+HG003+HG004	NovaSeq	100	TRUE	GT	FreeBayes	notinalllowmapandsegdup	4236250	4156916	358002	377261	0.9207	0.9182	0.9195	6
HG002+HG003+HG004	NovaSeq	100	TRUE	GT	Octopus	AllTandemRepeatsandHomopolymers	491222	522016	36042	32707	0.9354	0.9376	0.9365	6
HG002+HG003+HG004	NovaSeq	100	TRUE	GT	GATK4	AllTandemRepeatsandHomopolymers	464330	463730	48828	63318	0.9047	0.88	0.8922	6
HG002+HG003+HG004	NovaSeq	100	TRUE	GT	FreeBayes	AllTandemRepeatsandHomopolymers	446386	427426	64400	83387	0.8691	0.8426	0.8556	6
HG002+HG003+HG004	NovaSeq	100	TRUE	GT	Octopus	notinAllTandemRepeatsandHomopolymers	4248608	4249554	175722	170019	0.9603	0.9615	0.9609	6
HG002+HG003+HG004	NovaSeq	100	TRUE	GT	GATK4	notinAllTandemRepeatsandHomopolymers	4054274	4054365	297894	365413	0.9316	0.9173	0.9244	6
HG002+HG003+HG004	NovaSeq	100	TRUE	GT	FreeBayes	notinAllTandemRepeatsandHomopolymers	4055190	3986918	365450	365521	0.916	0.9173	0.9167	6
HG003+HG004	NovaSeq	10	TRUE	GT	Octopus	genome	3074743	3089772	954941	1935373	0.7639	0.6137	0.6806	4
HG003+HG004	NovaSeq	10	TRUE	GT	GATK4	genome	3005385	3005011	1085303	2004722	0.7347	0.5999	0.6605	4
HG003+HG004	NovaSeq	10	TRUE	GT	FreeBayes	genome	2679379	2631285	1067017	2330790	0.7115	0.5348	0.6106	4
HG003+HG004	NovaSeq	10	TRUE	GT	Octopus	alldifficult	656473	670686	255554	519708	0.7241	0.5581	0.6304	4
HG003+HG004	NovaSeq	10	TRUE	GT	GATK4	alldifficult	606870	606629	268331	569302	0.6933	0.516	0.5916	4
HG003+HG004	NovaSeq	10	TRUE	GT	FreeBayes	alldifficult	541378	525086	248385	634848	0.6789	0.4603	0.5486	4
HG003+HG004	NovaSeq	10	TRUE	GT	Octopus	alllowmapandsegdup	178738	178930	61286	168086	0.7449	0.5154	0.6092	4
HG003+HG004	NovaSeq	10	TRUE	GT	GATK4	alllowmapandsegdup	162563	162603	72637	184253	0.6912	0.4687	0.5586	4
HG003+HG004	NovaSeq	10	TRUE	GT	FreeBayes	alllowmapandsegdup	156312	151601	71688	190512	0.6789	0.4507	0.5418	4
HG003+HG004	NovaSeq	10	TRUE	GT	Octopus	notinalldifficult	2418494	2419599	699426	1415841	0.7758	0.6307	0.6958	4
HG003+HG004	NovaSeq	10	TRUE	GT	GATK4	notinalldifficult	2398743	2398846	817083	1435592	0.7459	0.6256	0.6805	4
HG003+HG004	NovaSeq	10	TRUE	GT	FreeBayes	notinalldifficult	2138099	2106928	840251	1696244	0.7149	0.5576	0.6265	4
HG003+HG004	NovaSeq	10	TRUE	GT	Octopus	notinalllowmapandsegdup	2895852	2910803	893618	1767223	0.7651	0.621	0.6856	4
HG003+HG004	NovaSeq	10	TRUE	GT	GATK4	notinalllowmapandsegdup	2842696	2842367	1012617	1820378	0.7373	0.6096	0.6674	4
HG003+HG004	NovaSeq	10	TRUE	GT	FreeBayes	notinalllowmapandsegdup	2522939	2479713	995688	2140189	0.7135	0.541	0.6154	4
HG003+HG004	NovaSeq	10	TRUE	GT	Octopus	AllTandemRepeatsandHomopolymers	307704	321757	147110	253459	0.6862	0.5483	0.6096	4
HG003+HG004	NovaSeq	10	TRUE	GT	GATK4	AllTandemRepeatsandHomopolymers	276305	276028	138426	284857	0.666	0.4924	0.5662	4
HG003+HG004	NovaSeq	10	TRUE	GT	FreeBayes	AllTandemRepeatsandHomopolymers	234865	226226	120284	326339	0.6529	0.4185	0.5101	4
HG003+HG004	NovaSeq	10	TRUE	GT	Octopus	notinAllTandemRepeatsandHomopolymers	2767387	2768571	807900	1682188	0.7741	0.6219	0.6897	4
HG003+HG004	NovaSeq	10	TRUE	GT	GATK4	notinAllTandemRepeatsandHomopolymers	2729418	2729472	947039	1720149	0.7424	0.6134	0.6718	4
HG003+HG004	NovaSeq	10	TRUE	GT	FreeBayes	notinAllTandemRepeatsandHomopolymers	2444709	2405788	970216	2004878	0.7126	0.5494	0.6205	4
HG003+HG004	NovaSeq	20	TRUE	GT	Octopus	genome	4222387	4251722	505172	787561	0.8938	0.8428	0.8676	4
HG003+HG004	NovaSeq	20	TRUE	GT	GATK4	genome	3952693	3951888	701955	1057341	0.8492	0.789	0.818	4
HG003+HG004	NovaSeq	20	TRUE	GT	FreeBayes	genome	3835983	3760771	726505	1174186	0.8381	0.7656	0.8002	4
HG003+HG004	NovaSeq	20	TRUE	GT	Octopus	alldifficult	926516	954786	158055	249600	0.858	0.7878	0.8214	4
HG003+HG004	NovaSeq	20	TRUE	GT	GATK4	alldifficult	839471	838871	193488	336634	0.8126	0.7138	0.76	4
HG003+HG004	NovaSeq	20	TRUE	GT	FreeBayes	alldifficult	803928	776092	193462	372298	0.8005	0.6835	0.7374	4
HG003+HG004	NovaSeq	20	TRUE	GT	Octopus	alllowmapandsegdup	251857	252144	44682	94959	0.8495	0.7262	0.783	4
HG003+HG004	NovaSeq	20	TRUE	GT	GATK4	alllowmapandsegdup	216190	216241	58419	130626	0.7873	0.6234	0.6958	4
HG003+HG004	NovaSeq	20	TRUE	GT	FreeBayes	alllowmapandsegdup	228148	220864	60472	118676	0.7851	0.6578	0.7158	4
HG003+HG004	NovaSeq	20	TRUE	GT	Octopus	notinalldifficult	3296173	3297677	347200	538059	0.9047	0.8597	0.8816	4
HG003+HG004	NovaSeq	20	TRUE	GT	GATK4	notinalldifficult	3113518	3113651	508538	720811	0.8596	0.812	0.8351	4
HG003+HG004	NovaSeq	20	TRUE	GT	FreeBayes	notinalldifficult	3032274	2985872	550762	802069	0.8443	0.7908	0.8167	4
HG003+HG004	NovaSeq	20	TRUE	GT	Octopus	notinalllowmapandsegdup	3970335	3999530	460489	692580	0.8968	0.8515	0.8735	4
HG003+HG004	NovaSeq	20	TRUE	GT	GATK4	notinalllowmapandsegdup	3736321	3735588	643505	926680	0.8531	0.8013	0.8263	4
HG003+HG004	NovaSeq	20	TRUE	GT	FreeBayes	notinalllowmapandsegdup	3607668	3539974	666322	1055460	0.8416	0.7737	0.8062	4
HG003+HG004	NovaSeq	20	TRUE	GT	Octopus	AllTandemRepeatsandHomopolymers	443564	471652	89977	117543	0.8398	0.7905	0.8144	4
HG003+HG004	NovaSeq	20	TRUE	GT	GATK4	AllTandemRepeatsandHomopolymers	405383	404741	98270	155708	0.8046	0.7225	0.7614	4
HG003+HG004	NovaSeq	20	TRUE	GT	FreeBayes	AllTandemRepeatsandHomopolymers	363585	347334	95082	197619	0.7851	0.6479	0.7099	4
HG003+HG004	NovaSeq	20	TRUE	GT	Octopus	notinAllTandemRepeatsandHomopolymers	3779327	3780907	415276	670136	0.901	0.8494	0.8745	4
HG003+HG004	NovaSeq	20	TRUE	GT	GATK4	notinAllTandemRepeatsandHomopolymers	3547787	3547852	603785	901778	0.8546	0.7973	0.825	4
HG003+HG004	NovaSeq	20	TRUE	GT	FreeBayes	notinAllTandemRepeatsandHomopolymers	3472768	3414647	650664	976819	0.8399	0.7805	0.8091	4
HG003+HG004	NovaSeq	30	TRUE	GT	Octopus	genome	4635896	4672947	297713	374057	0.9401	0.9253	0.9327	4
HG003+HG004	NovaSeq	30	TRUE	GT	GATK4	genome	4368640	4367642	474300	641372	0.902	0.872	0.8868	4
HG003+HG004	NovaSeq	30	TRUE	GT	FreeBayes	genome	4305499	4218209	493179	704653	0.8953	0.8594	0.877	4
HG003+HG004	NovaSeq	30	TRUE	GT	Octopus	alldifficult	1030708	1066740	107339	145367	0.9086	0.8764	0.8922	4
HG003+HG004	NovaSeq	30	TRUE	GT	GATK4	alldifficult	945087	944331	140878	231003	0.8702	0.8036	0.8356	4
HG003+HG004	NovaSeq	30	TRUE	GT	FreeBayes	alldifficult	919988	886697	146056	256223	0.8586	0.7822	0.8186	4
HG003+HG004	NovaSeq	30	TRUE	GT	Octopus	alllowmapandsegdup	281295	281640	38150	65525	0.8807	0.8111	0.8445	4
HG003+HG004	NovaSeq	30	TRUE	GT	GATK4	alllowmapandsegdup	239641	239698	48131	107179	0.8328	0.691	0.7553	4
HG003+HG004	NovaSeq	30	TRUE	GT	FreeBayes	alllowmapandsegdup	258436	249945	51659	88388	0.8287	0.7452	0.7847	4
HG003+HG004	NovaSeq	30	TRUE	GT	Octopus	notinalldifficult	3605553	3607082	190454	228725	0.9498	0.9403	0.9451	4
HG003+HG004	NovaSeq	30	TRUE	GT	GATK4	notinalldifficult	3423882	3424033	333472	410440	0.9113	0.893	0.902	4
HG003+HG004	NovaSeq	30	TRUE	GT	FreeBayes	notinalldifficult	3385819	3332998	359621	448522	0.9026	0.883	0.8927	4
HG003+HG004	NovaSeq	30	TRUE	GT	Octopus	notinalllowmapandsegdup	4354396	4391277	259591	308520	0.9442	0.9338	0.939	4
HG003+HG004	NovaSeq	30	TRUE	GT	GATK4	notinalllowmapandsegdup	4128808	4127895	426146	534167	0.9064	0.8854	0.8958	4
HG003+HG004	NovaSeq	30	TRUE	GT	FreeBayes	notinalllowmapandsegdup	4046886	3968369	441739	616225	0.8998	0.8679	0.8836	4
HG003+HG004	NovaSeq	30	TRUE	GT	Octopus	AllTandemRepeatsandHomopolymers	497708	533574	56169	63354	0.9048	0.8871	0.8958	4
HG003+HG004	NovaSeq	30	TRUE	GT	GATK4	AllTandemRepeatsandHomopolymers	466461	465651	67534	94616	0.8733	0.8314	0.8518	4
HG003+HG004	NovaSeq	30	TRUE	GT	FreeBayes	AllTandemRepeatsandHomopolymers	425260	405340	68932	135930	0.8547	0.7578	0.8033	4
HG003+HG004	NovaSeq	30	TRUE	GT	Octopus	notinAllTandemRepeatsandHomopolymers	4138763	4140326	241606	310750	0.9449	0.9302	0.9375	4
HG003+HG004	NovaSeq	30	TRUE	GT	GATK4	notinAllTandemRepeatsandHomopolymers	3902710	3902786	406831	546847	0.9056	0.8771	0.8911	4
HG003+HG004	NovaSeq	30	TRUE	GT	FreeBayes	notinAllTandemRepeatsandHomopolymers	3880708	3814347	437770	568876	0.897	0.8722	0.8844	4
HG003+HG004	NovaSeq	40	TRUE	GT	Octopus	genome	4785491	4825897	195359	224443	0.9611	0.9552	0.9581	4
HG003+HG004	NovaSeq	40	TRUE	GT	GATK4	genome	4568315	4567216	332807	441673	0.9321	0.9118	0.9218	4
HG003+HG004	NovaSeq	40	TRUE	GT	FreeBayes	genome	4533263	4439944	363203	476882	0.9244	0.9048	0.9145	4
HG003+HG004	NovaSeq	40	TRUE	GT	Octopus	alldifficult	1072939	1112462	81490	103130	0.9317	0.9123	0.9219	4
HG003+HG004	NovaSeq	40	TRUE	GT	GATK4	alldifficult	996618	995767	107033	179448	0.9029	0.8474	0.8743	4
HG003+HG004	NovaSeq	40	TRUE	GT	FreeBayes	alldifficult	981437	945053	118466	194767	0.8886	0.8344	0.8607	4
HG003+HG004	NovaSeq	40	TRUE	GT	Octopus	alllowmapandsegdup	292909	293273	35293	53907	0.8926	0.8446	0.8679	4
HG003+HG004	NovaSeq	40	TRUE	GT	GATK4	alllowmapandsegdup	250699	250757	41149	96117	0.859	0.7229	0.7851	4
HG003+HG004	NovaSeq	40	TRUE	GT	FreeBayes	alllowmapandsegdup	273270	264172	46889	73554	0.8493	0.7879	0.8174	4
HG003+HG004	NovaSeq	40	TRUE	GT	Octopus	notinalldifficult	3712943	3714372	113905	121322	0.9702	0.9684	0.9693	4
HG003+HG004	NovaSeq	40	TRUE	GT	GATK4	notinalldifficult	3572073	3572236	225791	262249	0.9406	0.9316	0.9361	4
HG003+HG004	NovaSeq	40	TRUE	GT	FreeBayes	notinalldifficult	3552175	3496458	253953	282166	0.9323	0.9264	0.9293	4
HG003+HG004	NovaSeq	40	TRUE	GT	Octopus	notinalllowmapandsegdup	4492374	4532596	160080	170527	0.9659	0.9634	0.9647	4
HG003+HG004	NovaSeq	40	TRUE	GT	GATK4	notinalllowmapandsegdup	4317416	4316404	291639	345539	0.9367	0.9259	0.9313	4
HG003+HG004	NovaSeq	40	TRUE	GT	FreeBayes	notinalllowmapandsegdup	4259809	4175883	316507	403295	0.9295	0.9135	0.9215	4
HG003+HG004	NovaSeq	40	TRUE	GT	Octopus	AllTandemRepeatsandHomopolymers	520723	560088	38422	40337	0.9358	0.9281	0.9319	4
HG003+HG004	NovaSeq	40	TRUE	GT	GATK4	AllTandemRepeatsandHomopolymers	496729	495836	47962	64328	0.9118	0.8853	0.8984	4
HG003+HG004	NovaSeq	40	TRUE	GT	FreeBayes	AllTandemRepeatsandHomopolymers	460636	438431	52993	100547	0.8922	0.8208	0.855	4
HG003+HG004	NovaSeq	40	TRUE	GT	Octopus	notinAllTandemRepeatsandHomopolymers	4265371	4266828	156967	184125	0.9645	0.9586	0.9616	4
HG003+HG004	NovaSeq	40	TRUE	GT	GATK4	notinAllTandemRepeatsandHomopolymers	4072163	4072239	284875	377390	0.9346	0.9152	0.9248	4
HG003+HG004	NovaSeq	40	TRUE	GT	FreeBayes	notinAllTandemRepeatsandHomopolymers	4073157	4003071	320191	376427	0.9259	0.9154	0.9206	4
HG003+HG004	NovaSeq	50	TRUE	GT	Octopus	genome	4854163	4896443	139707	155755	0.9723	0.9689	0.9706	4
HG003+HG004	NovaSeq	50	TRUE	GT	GATK4	genome	4682172	4681035	244310	327799	0.9504	0.9346	0.9424	4
HG003+HG004	NovaSeq	50	TRUE	GT	FreeBayes	genome	4658279	4561190	281558	351873	0.9419	0.9298	0.9358	4
HG003+HG004	NovaSeq	50	TRUE	GT	Octopus	alldifficult	1094210	1135682	66806	81847	0.9444	0.9304	0.9374	4
HG003+HG004	NovaSeq	50	TRUE	GT	GATK4	alldifficult	1025737	1024851	85615	150312	0.9229	0.8722	0.8968	4
HG003+HG004	NovaSeq	50	TRUE	GT	FreeBayes	alldifficult	1018312	979817	101151	157899	0.9064	0.8658	0.8856	4
HG003+HG004	NovaSeq	50	TRUE	GT	Octopus	alllowmapandsegdup	298988	299370	33956	47828	0.8981	0.8621	0.8797	4
HG003+HG004	NovaSeq	50	TRUE	GT	GATK4	alllowmapandsegdup	257071	257127	36634	89741	0.8753	0.7412	0.8027	4
HG003+HG004	NovaSeq	50	TRUE	GT	FreeBayes	alllowmapandsegdup	281631	272195	43978	65193	0.8609	0.812	0.8358	4
HG003+HG004	NovaSeq	50	TRUE	GT	Octopus	notinalldifficult	3760340	3761702	72943	73921	0.981	0.9807	0.9808	4
HG003+HG004	NovaSeq	50	TRUE	GT	GATK4	notinalldifficult	3656813	3656983	158705	177508	0.9584	0.9537	0.9561	4
HG003+HG004	NovaSeq	50	TRUE	GT	FreeBayes	notinalldifficult	3640343	3582995	187485	193998	0.9503	0.9494	0.9498	4
HG003+HG004	NovaSeq	50	TRUE	GT	Octopus	notinalllowmapandsegdup	4554964	4597048	105772	107921	0.9775	0.9769	0.9772	4
HG003+HG004	NovaSeq	50	TRUE	GT	GATK4	notinalllowmapandsegdup	4424900	4423855	207660	238042	0.9552	0.949	0.952	4
HG003+HG004	NovaSeq	50	TRUE	GT	FreeBayes	notinalllowmapandsegdup	4376461	4289115	237758	286650	0.9475	0.9385	0.943	4
HG003+HG004	NovaSeq	50	TRUE	GT	Octopus	AllTandemRepeatsandHomopolymers	532706	574033	27917	28348	0.9536	0.9495	0.9515	4
HG003+HG004	NovaSeq	50	TRUE	GT	GATK4	AllTandemRepeatsandHomopolymers	513740	512812	35725	47300	0.9349	0.9157	0.9252	4
HG003+HG004	NovaSeq	50	TRUE	GT	FreeBayes	AllTandemRepeatsandHomopolymers	483091	459295	42827	78099	0.9147	0.8608	0.887	4
HG003+HG004	NovaSeq	50	TRUE	GT	Octopus	notinAllTandemRepeatsandHomopolymers	4322058	4323438	111824	127428	0.9748	0.9714	0.9731	4
HG003+HG004	NovaSeq	50	TRUE	GT	GATK4	notinAllTandemRepeatsandHomopolymers	4169009	4169090	208611	280543	0.9523	0.937	0.9446	4
HG003+HG004	NovaSeq	50	TRUE	GT	FreeBayes	notinAllTandemRepeatsandHomopolymers	4175747	4103517	246391	273837	0.9434	0.9385	0.9409	4
HG003+HG004	NovaSeq	60	TRUE	GT	Octopus	genome	4891825	4935137	107955	118088	0.9786	0.9764	0.9775	4
HG003+HG004	NovaSeq	60	TRUE	GT	GATK4	genome	4754643	4753486	184912	255330	0.9626	0.949	0.9557	4
HG003+HG004	NovaSeq	60	TRUE	GT	FreeBayes	genome	4732932	4633847	226206	277225	0.9535	0.9447	0.949	4
HG003+HG004	NovaSeq	60	TRUE	GT	Octopus	alldifficult	1106242	1148788	58769	69810	0.9513	0.9406	0.946	4
HG003+HG004	NovaSeq	60	TRUE	GT	GATK4	alldifficult	1045432	1044530	70430	130619	0.9368	0.8889	0.9123	4
HG003+HG004	NovaSeq	60	TRUE	GT	FreeBayes	alldifficult	1041008	1001404	88861	135206	0.9185	0.885	0.9015	4
HG003+HG004	NovaSeq	60	TRUE	GT	Octopus	alllowmapandsegdup	302489	302886	33670	44327	0.9	0.8722	0.8859	4
HG003+HG004	NovaSeq	60	TRUE	GT	GATK4	alllowmapandsegdup	261421	261476	33328	85391	0.8869	0.7538	0.815	4
HG003+HG004	NovaSeq	60	TRUE	GT	FreeBayes	alllowmapandsegdup	286849	277202	41791	59975	0.869	0.8271	0.8475	4
HG003+HG004	NovaSeq	60	TRUE	GT	Octopus	notinalldifficult	3785970	3787290	49230	48291	0.9872	0.9874	0.9873	4
HG003+HG004	NovaSeq	60	TRUE	GT	GATK4	notinalldifficult	3709596	3709765	114492	124725	0.9701	0.9675	0.9688	4
HG003+HG004	NovaSeq	60	TRUE	GT	FreeBayes	notinalldifficult	3692303	3634080	143148	142040	0.9621	0.963	0.9625	4
HG003+HG004	NovaSeq	60	TRUE	GT	Octopus	notinalllowmapandsegdup	4589122	4632223	74306	73758	0.9842	0.9842	0.9842	4
HG003+HG004	NovaSeq	60	TRUE	GT	GATK4	notinalllowmapandsegdup	4493016	4491950	151570	169928	0.9674	0.9636	0.9655	4
HG003+HG004	NovaSeq	60	TRUE	GT	FreeBayes	notinalllowmapandsegdup	4445887	4356763	184576	217229	0.9594	0.9534	0.9564	4
HG003+HG004	NovaSeq	60	TRUE	GT	Octopus	AllTandemRepeatsandHomopolymers	539516	581922	21633	21533	0.9642	0.9616	0.9629	4
HG003+HG004	NovaSeq	60	TRUE	GT	GATK4	AllTandemRepeatsandHomopolymers	525350	524403	26960	35692	0.9511	0.9364	0.9437	4
HG003+HG004	NovaSeq	60	TRUE	GT	FreeBayes	AllTandemRepeatsandHomopolymers	496881	472269	35699	64311	0.9297	0.8854	0.907	4
HG003+HG004	NovaSeq	60	TRUE	GT	Octopus	notinAllTandemRepeatsandHomopolymers	4352912	4354245	86357	96574	0.9806	0.9783	0.9794	4
HG003+HG004	NovaSeq	60	TRUE	GT	GATK4	notinAllTandemRepeatsandHomopolymers	4229882	4229963	157975	219670	0.964	0.9506	0.9573	4
HG003+HG004	NovaSeq	60	TRUE	GT	FreeBayes	notinAllTandemRepeatsandHomopolymers	4236623	4163224	196771	212964	0.9549	0.9521	0.9535	4
HG003+HG004	NovaSeq	70	TRUE	GT	Octopus	genome	4914527	4958407	88545	95399	0.9825	0.981	0.9817	4
HG003+HG004	NovaSeq	70	TRUE	GT	GATK4	genome	4801938	4800770	144787	208031	0.9707	0.9585	0.9646	4
HG003+HG004	NovaSeq	70	TRUE	GT	FreeBayes	genome	4782071	4681532	188183	228086	0.9614	0.9545	0.9579	4
HG003+HG004	NovaSeq	70	TRUE	GT	Octopus	alldifficult	1113726	1156879	53706	62324	0.9556	0.947	0.9513	4
HG003+HG004	NovaSeq	70	TRUE	GT	GATK4	alldifficult	1057746	1056833	60693	118301	0.9457	0.8994	0.922	4
HG003+HG004	NovaSeq	70	TRUE	GT	FreeBayes	alldifficult	1056417	1015975	80345	119797	0.9267	0.8982	0.9122	4
HG003+HG004	NovaSeq	70	TRUE	GT	Octopus	alllowmapandsegdup	304681	305076	33676	42135	0.9006	0.8785	0.8894	4
HG003+HG004	NovaSeq	70	TRUE	GT	GATK4	alllowmapandsegdup	264145	264200	31037	82667	0.8949	0.7616	0.8229	4
HG003+HG004	NovaSeq	70	TRUE	GT	FreeBayes	alllowmapandsegdup	290586	280773	40317	56238	0.8744	0.8378	0.8558	4
HG003+HG004	NovaSeq	70	TRUE	GT	Octopus	notinalldifficult	3801194	3802477	34873	33082	0.9909	0.9914	0.9911	4
HG003+HG004	NovaSeq	70	TRUE	GT	GATK4	notinalldifficult	3744584	3744754	84105	89737	0.978	0.9766	0.9773	4
HG003+HG004	NovaSeq	70	TRUE	GT	FreeBayes	notinalldifficult	3726037	3667203	112590	108306	0.9702	0.9718	0.971	4
HG003+HG004	NovaSeq	70	TRUE	GT	Octopus	notinalllowmapandsegdup	4609628	4653303	54894	53265	0.9883	0.9886	0.9885	4
HG003+HG004	NovaSeq	70	TRUE	GT	GATK4	notinalllowmapandsegdup	4537588	4536515	113736	125352	0.9755	0.9731	0.9743	4
HG003+HG004	NovaSeq	70	TRUE	GT	FreeBayes	notinalllowmapandsegdup	4491287	4400881	148022	171829	0.9675	0.9632	0.9653	4
HG003+HG004	NovaSeq	70	TRUE	GT	Octopus	AllTandemRepeatsandHomopolymers	543742	586760	17519	17305	0.971	0.9692	0.9701	4
HG003+HG004	NovaSeq	70	TRUE	GT	GATK4	AllTandemRepeatsandHomopolymers	532711	531754	21389	28327	0.9613	0.9495	0.9554	4
HG003+HG004	NovaSeq	70	TRUE	GT	FreeBayes	AllTandemRepeatsandHomopolymers	506268	481024	30681	54924	0.94	0.9021	0.9207	4
HG003+HG004	NovaSeq	70	TRUE	GT	Octopus	notinAllTandemRepeatsandHomopolymers	4371395	4372686	71051	78106	0.984	0.9824	0.9832	4
HG003+HG004	NovaSeq	70	TRUE	GT	GATK4	notinAllTandemRepeatsandHomopolymers	4269821	4269898	123421	179731	0.9719	0.9596	0.9657	4
HG003+HG004	NovaSeq	70	TRUE	GT	FreeBayes	notinAllTandemRepeatsandHomopolymers	4276380	4202163	162629	173207	0.9627	0.9611	0.9619	4
HG002	NovaSeq	10	TRUE	GT	Octopus	genome	3479049	3501362	37888	411475	0.9893	0.8942	0.9394	2
HG002	NovaSeq	10	TRUE	GT	GATK4	genome	3501177	3501115	62928	389347	0.9823	0.8999	0.9393	2
HG002	NovaSeq	10	TRUE	GT	FreeBayes	genome	3322883	3256226	66585	567641	0.98	0.8541	0.9127	2
HG002	NovaSeq	10	TRUE	GT	Octopus	alldifficult	836319	857724	24745	160293	0.972	0.8392	0.9007	2
HG002	NovaSeq	10	TRUE	GT	GATK4	alldifficult	809348	809440	32679	187264	0.9612	0.8121	0.8804	2
HG002	NovaSeq	10	TRUE	GT	FreeBayes	alldifficult	759669	732713	32211	236943	0.9579	0.7623	0.8489	2
HG002	NovaSeq	10	TRUE	GT	Octopus	alllowmapandsegdup	212725	213068	7167	63984	0.9675	0.7688	0.8567	2
HG002	NovaSeq	10	TRUE	GT	GATK4	alllowmapandsegdup	193607	193661	12970	83102	0.9372	0.6997	0.8012	2
HG002	NovaSeq	10	TRUE	GT	FreeBayes	alllowmapandsegdup	202207	195393	12244	74502	0.941	0.7308	0.8227	2
HG002	NovaSeq	10	TRUE	GT	Octopus	notinalldifficult	2642879	2644178	13146	251216	0.9951	0.9132	0.9524	2
HG002	NovaSeq	10	TRUE	GT	GATK4	notinalldifficult	2691990	2692150	30256	202105	0.9889	0.9302	0.9586	2
HG002	NovaSeq	10	TRUE	GT	FreeBayes	notinalldifficult	2563311	2524588	37761	330784	0.9853	0.8857	0.9328	2
HG002	NovaSeq	10	TRUE	GT	Octopus	notinalllowmapandsegdup	3266137	3288252	30716	347476	0.9907	0.9038	0.9453	2
HG002	NovaSeq	10	TRUE	GT	GATK4	notinalllowmapandsegdup	3307384	3307382	49954	306229	0.9851	0.9153	0.9489	2
HG002	NovaSeq	10	TRUE	GT	FreeBayes	notinalllowmapandsegdup	3120503	3060870	54427	493110	0.9825	0.8635	0.9192	2
HG002	NovaSeq	10	TRUE	GT	Octopus	AllTandemRepeatsandHomopolymers	443030	464273	16922	78752	0.9648	0.8491	0.9033	2
HG002	NovaSeq	10	TRUE	GT	GATK4	AllTandemRepeatsandHomopolymers	430795	430855	18116	90987	0.9596	0.8256	0.8876	2
HG002	NovaSeq	10	TRUE	GT	FreeBayes	AllTandemRepeatsandHomopolymers	381141	364844	18266	140641	0.9523	0.7305	0.8268	2
HG002	NovaSeq	10	TRUE	GT	Octopus	notinAllTandemRepeatsandHomopolymers	3036358	3037752	20970	332801	0.9931	0.9012	0.945	2
HG002	NovaSeq	10	TRUE	GT	GATK4	notinAllTandemRepeatsandHomopolymers	3070735	3070832	44821	298424	0.9856	0.9114	0.9471	2
HG002	NovaSeq	10	TRUE	GT	FreeBayes	notinAllTandemRepeatsandHomopolymers	2942003	2892543	51989	427156	0.9823	0.8732	0.9246	2
HG002	NovaSeq	20	TRUE	GT	Octopus	genome	3763252	3792476	13006	127272	0.9966	0.9673	0.9817	2
HG002	NovaSeq	20	TRUE	GT	GATK4	genome	3766172	3766097	26642	124352	0.993	0.968	0.9803	2
HG002	NovaSeq	20	TRUE	GT	FreeBayes	genome	3754785	3675483	28352	135739	0.9923	0.9651	0.9785	2
HG002	NovaSeq	20	TRUE	GT	Octopus	alldifficult	930336	958530	12100	66276	0.9875	0.9335	0.9598	2
HG002	NovaSeq	20	TRUE	GT	GATK4	alldifficult	904633	904719	19497	91979	0.9789	0.9077	0.942	2
HG002	NovaSeq	20	TRUE	GT	FreeBayes	alldifficult	900861	866865	21605	95751	0.9757	0.9039	0.9384	2
HG002	NovaSeq	20	TRUE	GT	Octopus	alllowmapandsegdup	237599	238045	7953	39110	0.9677	0.8587	0.9099	2
HG002	NovaSeq	20	TRUE	GT	GATK4	alllowmapandsegdup	210357	210418	13661	66352	0.939	0.7602	0.8402	2
HG002	NovaSeq	20	TRUE	GT	FreeBayes	alllowmapandsegdup	235210	226906	11985	41499	0.9498	0.85	0.8972	2
HG002	NovaSeq	20	TRUE	GT	Octopus	notinalldifficult	2833094	2834592	908	61001	0.9997	0.9789	0.9892	2
HG002	NovaSeq	20	TRUE	GT	GATK4	notinalldifficult	2861726	2861906	7143	32369	0.9975	0.9888	0.9931	2
HG002	NovaSeq	20	TRUE	GT	FreeBayes	notinalldifficult	2854123	2809984	8112	39972	0.9971	0.9862	0.9916	2
HG002	NovaSeq	20	TRUE	GT	Octopus	notinalllowmapandsegdup	3525454	3554403	5055	88159	0.9986	0.9756	0.987	2
HG002	NovaSeq	20	TRUE	GT	GATK4	notinalllowmapandsegdup	3555622	3555614	12983	57991	0.9964	0.984	0.9901	2
HG002	NovaSeq	20	TRUE	GT	FreeBayes	notinalllowmapandsegdup	3519369	3448631	16415	94244	0.9953	0.9739	0.9845	2
HG002	NovaSeq	20	TRUE	GT	Octopus	AllTandemRepeatsandHomopolymers	499036	527064	4394	22746	0.9917	0.9564	0.9737	2
HG002	NovaSeq	20	TRUE	GT	GATK4	AllTandemRepeatsandHomopolymers	498153	498208	5828	23629	0.9884	0.9547	0.9713	2
HG002	NovaSeq	20	TRUE	GT	FreeBayes	AllTandemRepeatsandHomopolymers	470065	448703	9680	51717	0.9789	0.9009	0.9383	2
HG002	NovaSeq	20	TRUE	GT	Octopus	notinAllTandemRepeatsandHomopolymers	3264609	3266191	8617	104550	0.9974	0.969	0.983	2
HG002	NovaSeq	20	TRUE	GT	GATK4	notinAllTandemRepeatsandHomopolymers	3268421	3268528	20815	100738	0.9937	0.9701	0.9817	2
HG002	NovaSeq	20	TRUE	GT	FreeBayes	notinAllTandemRepeatsandHomopolymers	3285121	3228248	20150	84038	0.9938	0.9751	0.9843	2
HG002	NovaSeq	30	TRUE	GT	Octopus	genome	3825514	3856419	11423	65010	0.997	0.9833	0.9901	2
HG002	NovaSeq	30	TRUE	GT	GATK4	genome	3805257	3805185	20653	85267	0.9946	0.9781	0.9863	2
HG002	NovaSeq	30	TRUE	GT	FreeBayes	genome	3816631	3734872	26336	73893	0.993	0.981	0.987	2
HG002	NovaSeq	30	TRUE	GT	Octopus	alldifficult	952700	982562	10671	43912	0.9893	0.9559	0.9723	2
HG002	NovaSeq	30	TRUE	GT	GATK4	alldifficult	922008	922097	16459	74604	0.9825	0.9251	0.9529	2
HG002	NovaSeq	30	TRUE	GT	FreeBayes	alldifficult	932169	896406	20506	64443	0.9776	0.9353	0.956	2
HG002	NovaSeq	30	TRUE	GT	Octopus	alllowmapandsegdup	244462	244915	8733	32247	0.9656	0.8835	0.9227	2
HG002	NovaSeq	30	TRUE	GT	GATK4	alllowmapandsegdup	213604	213664	13613	63105	0.9401	0.7719	0.8478	2
HG002	NovaSeq	30	TRUE	GT	FreeBayes	alllowmapandsegdup	242413	233753	12786	34296	0.9481	0.8761	0.9107	2
HG002	NovaSeq	30	TRUE	GT	Octopus	notinalldifficult	2873004	2874526	750	21091	0.9997	0.9927	0.9962	2
HG002	NovaSeq	30	TRUE	GT	GATK4	notinalldifficult	2883436	2883615	4193	10659	0.9985	0.9963	0.9974	2
HG002	NovaSeq	30	TRUE	GT	FreeBayes	notinalldifficult	2884672	2839850	6607	9423	0.9977	0.9967	0.9972	2
HG002	NovaSeq	30	TRUE	GT	Octopus	notinalllowmapandsegdup	3580850	3611480	2691	32763	0.9993	0.9909	0.9951	2
HG002	NovaSeq	30	TRUE	GT	GATK4	notinalllowmapandsegdup	3591453	3591449	7044	22160	0.998	0.9939	0.996	2
HG002	NovaSeq	30	TRUE	GT	FreeBayes	notinalllowmapandsegdup	3574010	3501179	13595	39603	0.9961	0.989	0.9926	2
HG002	NovaSeq	30	TRUE	GT	Octopus	AllTandemRepeatsandHomopolymers	511747	541447	2227	10035	0.9959	0.9808	0.9883	2
HG002	NovaSeq	30	TRUE	GT	GATK4	AllTandemRepeatsandHomopolymers	510600	510656	3031	11182	0.9941	0.9786	0.9863	2
HG002	NovaSeq	30	TRUE	GT	FreeBayes	AllTandemRepeatsandHomopolymers	492007	469331	7866	29775	0.9835	0.9429	0.9628	2
HG002	NovaSeq	30	TRUE	GT	Octopus	notinAllTandemRepeatsandHomopolymers	3314180	3315784	9195	54979	0.9972	0.9837	0.9904	2
HG002	NovaSeq	30	TRUE	GT	GATK4	notinAllTandemRepeatsandHomopolymers	3295062	3295168	17622	74097	0.9947	0.978	0.9863	2
HG002	NovaSeq	30	TRUE	GT	FreeBayes	notinAllTandemRepeatsandHomopolymers	3325052	3267044	19317	44107	0.9941	0.9869	0.9905	2
HG002+HG003+HG004	NovaSeq	10	FALSE	GT	Octopus	genome	2408992	2420015	1607325	2536408	0.6009	0.4871	0.5381	6
HG002+HG003+HG004	NovaSeq	10	FALSE	GT	GATK4	genome	2404480	2404303	1988917	2544209	0.5473	0.4859	0.5148	6
HG002+HG003+HG004	NovaSeq	10	FALSE	GT	FreeBayes	genome	2410574	2369952	2540364	2540329	0.4826	0.4869	0.4848	6
HG002+HG003+HG004	NovaSeq	10	FALSE	GT	Octopus	alldifficult	510118	519989	412540	620090	0.5576	0.4513	0.4989	6
HG002+HG003+HG004	NovaSeq	10	FALSE	GT	GATK4	alldifficult	498831	498750	470469	633624	0.5146	0.4405	0.4747	6
HG002+HG003+HG004	NovaSeq	10	FALSE	GT	FreeBayes	alldifficult	495090	481569	610086	639057	0.4411	0.4365	0.4388	6
HG002+HG003+HG004	NovaSeq	10	FALSE	GT	Octopus	alllowmapandsegdup	142195	142344	105138	193819	0.5752	0.4232	0.4876	6
HG002+HG003+HG004	NovaSeq	10	FALSE	GT	GATK4	alllowmapandsegdup	141051	141092	137914	195000	0.5057	0.4197	0.4587	6
HG002+HG003+HG004	NovaSeq	10	FALSE	GT	FreeBayes	alllowmapandsegdup	144945	140556	174877	191219	0.4456	0.4312	0.4383	6
HG002+HG003+HG004	NovaSeq	10	FALSE	GT	Octopus	notinalldifficult	1898982	1900345	1194919	1916601	0.614	0.4977	0.5497	6
HG002+HG003+HG004	NovaSeq	10	FALSE	GT	GATK4	notinalldifficult	1905749	1905846	1518678	1910876	0.5565	0.4993	0.5264	6
HG002+HG003+HG004	NovaSeq	10	FALSE	GT	FreeBayes	notinalldifficult	1915547	1888979	1971196	1901600	0.4894	0.5018	0.4955	6
HG002+HG003+HG004	NovaSeq	10	FALSE	GT	Octopus	notinalllowmapandsegdup	2266647	2277609	1502155	2342527	0.6026	0.4918	0.5416	6
HG002+HG003+HG004	NovaSeq	10	FALSE	GT	GATK4	notinalllowmapandsegdup	2263292	2263153	1850966	2349135	0.5501	0.4907	0.5187	6
HG002+HG003+HG004	NovaSeq	10	FALSE	GT	FreeBayes	notinalllowmapandsegdup	2265498	2229403	2366355	2349030	0.4851	0.4909	0.488	6
HG002+HG003+HG004	NovaSeq	10	FALSE	GT	Octopus	AllTandemRepeatsandHomopolymers	234142	243813	224531	292908	0.5206	0.4443	0.4794	6
HG002+HG003+HG004	NovaSeq	10	FALSE	GT	GATK4	AllTandemRepeatsandHomopolymers	223929	223815	224399	305261	0.4993	0.4232	0.4581	6
HG002+HG003+HG004	NovaSeq	10	FALSE	GT	FreeBayes	AllTandemRepeatsandHomopolymers	215448	208789	283522	315246	0.4241	0.406	0.4148	6
HG002+HG003+HG004	NovaSeq	10	FALSE	GT	Octopus	notinAllTandemRepeatsandHomopolymers	2175079	2176573	1382971	2243872	0.6115	0.4922	0.5454	6
HG002+HG003+HG004	NovaSeq	10	FALSE	GT	GATK4	notinAllTandemRepeatsandHomopolymers	2180759	2180816	1764807	2239341	0.5527	0.4934	0.5214	6
HG002+HG003+HG004	NovaSeq	10	FALSE	GT	FreeBayes	notinAllTandemRepeatsandHomopolymers	2195292	2161771	2301142	2225519	0.4844	0.4966	0.4904	6
HG002+HG003+HG004	NovaSeq	20	FALSE	GT	Octopus	genome	3400326	3420092	1230916	1543100	0.7353	0.6878	0.7108	6
HG002+HG003+HG004	NovaSeq	20	FALSE	GT	GATK4	genome	3294969	3294611	1741953	1652692	0.6541	0.666	0.66	6
HG002+HG003+HG004	NovaSeq	20	FALSE	GT	FreeBayes	genome	3273955	3215026	2785264	1676532	0.5358	0.6613	0.592	6
HG002+HG003+HG004	NovaSeq	20	FALSE	GT	Octopus	alldifficult	731348	749662	342040	396543	0.6867	0.6484	0.667	6
HG002+HG003+HG004	NovaSeq	20	FALSE	GT	GATK4	alldifficult	698060	697832	442173	433468	0.6121	0.6169	0.6145	6
HG002+HG003+HG004	NovaSeq	20	FALSE	GT	FreeBayes	alldifficult	684181	663580	692691	449564	0.4893	0.6035	0.5404	6
HG002+HG003+HG004	NovaSeq	20	FALSE	GT	Octopus	alllowmapandsegdup	202725	202932	93220	133251	0.6852	0.6034	0.6417	6
HG002+HG003+HG004	NovaSeq	20	FALSE	GT	GATK4	alllowmapandsegdup	195522	195566	145588	140509	0.5732	0.5819	0.5775	6
HG002+HG003+HG004	NovaSeq	20	FALSE	GT	FreeBayes	alllowmapandsegdup	198657	192367	208612	137528	0.4797	0.5909	0.5296	6
HG002+HG003+HG004	NovaSeq	20	FALSE	GT	Octopus	notinalldifficult	2669214	2670997	889089	1146712	0.7503	0.6995	0.724	6
HG002+HG003+HG004	NovaSeq	20	FALSE	GT	GATK4	notinalldifficult	2597113	2597235	1299956	1219411	0.6664	0.6805	0.6734	6
HG002+HG003+HG004	NovaSeq	20	FALSE	GT	FreeBayes	notinalldifficult	2589981	2552406	2130765	1227153	0.545	0.6785	0.6045	6
HG002+HG003+HG004	NovaSeq	20	FALSE	GT	Octopus	notinalllowmapandsegdup	3197441	3217120	1137711	1409797	0.7387	0.694	0.7157	6
HG002+HG003+HG004	NovaSeq	20	FALSE	GT	GATK4	notinalllowmapandsegdup	3099290	3098984	1596324	1512129	0.66	0.6721	0.666	6
HG002+HG003+HG004	NovaSeq	20	FALSE	GT	FreeBayes	notinalllowmapandsegdup	3075151	3022695	2577632	1538940	0.5397	0.6665	0.5964	6
HG002+HG003+HG004	NovaSeq	20	FALSE	GT	Octopus	AllTandemRepeatsandHomopolymers	340470	358556	187344	184371	0.6568	0.6487	0.6527	6
HG002+HG003+HG004	NovaSeq	20	FALSE	GT	GATK4	AllTandemRepeatsandHomopolymers	320369	320115	202795	207952	0.6122	0.6064	0.6093	6
HG002+HG003+HG004	NovaSeq	20	FALSE	GT	FreeBayes	AllTandemRepeatsandHomopolymers	303930	293053	311209	226365	0.485	0.5731	0.5254	6
HG002+HG003+HG004	NovaSeq	20	FALSE	GT	Octopus	notinAllTandemRepeatsandHomopolymers	3060237	3062163	1043793	1358949	0.7458	0.6925	0.7181	6
HG002+HG003+HG004	NovaSeq	20	FALSE	GT	GATK4	notinAllTandemRepeatsandHomopolymers	2974944	2975010	1539395	1444997	0.659	0.6731	0.666	6
HG002+HG003+HG004	NovaSeq	20	FALSE	GT	FreeBayes	notinAllTandemRepeatsandHomopolymers	2970367	2922951	2515245	1450427	0.5375	0.6719	0.5972	6
HG002+HG003+HG004	NovaSeq	30	FALSE	GT	Octopus	genome	3953931	3978771	928384	988228	0.8108	0.8	0.8054	6
HG002+HG003+HG004	NovaSeq	30	FALSE	GT	GATK4	genome	3720501	3720020	1350048	1226528	0.7337	0.7521	0.7428	6
HG002+HG003+HG004	NovaSeq	30	FALSE	GT	FreeBayes	genome	3686060	3617088	2332484	1264136	0.608	0.7446	0.6694	6
HG002+HG003+HG004	NovaSeq	30	FALSE	GT	Octopus	alldifficult	853780	877400	277499	273053	0.7597	0.7577	0.7587	6
HG002+HG003+HG004	NovaSeq	30	FALSE	GT	GATK4	alldifficult	798101	797772	376157	332907	0.6796	0.7057	0.6924	6
HG002+HG003+HG004	NovaSeq	30	FALSE	GT	FreeBayes	alldifficult	777499	752821	608043	355963	0.5532	0.686	0.6125	6
HG002+HG003+HG004	NovaSeq	30	FALSE	GT	Octopus	alllowmapandsegdup	237387	237610	84241	98540	0.7383	0.7067	0.7221	6
HG002+HG003+HG004	NovaSeq	30	FALSE	GT	GATK4	alllowmapandsegdup	221577	221619	136018	114416	0.6197	0.6595	0.639	6
HG002+HG003+HG004	NovaSeq	30	FALSE	GT	FreeBayes	alllowmapandsegdup	223471	216266	192555	112706	0.529	0.6647	0.5892	6
HG002+HG003+HG004	NovaSeq	30	FALSE	GT	Octopus	notinalldifficult	3100450	3102072	651124	715267	0.8265	0.8125	0.8195	6
HG002+HG003+HG004	NovaSeq	30	FALSE	GT	GATK4	notinalldifficult	2922640	2922778	974052	893772	0.75	0.7658	0.7578	6
HG002+HG003+HG004	NovaSeq	30	FALSE	GT	FreeBayes	notinalldifficult	2908806	2865428	1757009	908320	0.6199	0.762	0.6837	6
HG002+HG003+HG004	NovaSeq	30	FALSE	GT	Octopus	notinalllowmapandsegdup	3716374	3741122	844204	889646	0.8159	0.8069	0.8113	6
HG002+HG003+HG004	NovaSeq	30	FALSE	GT	GATK4	notinalllowmapandsegdup	3498747	3498320	1214007	1112077	0.7424	0.7588	0.7505	6
HG002+HG003+HG004	NovaSeq	30	FALSE	GT	FreeBayes	notinalllowmapandsegdup	3462429	3400881	2140898	1151379	0.6137	0.7504	0.6752	6
HG002+HG003+HG004	NovaSeq	30	FALSE	GT	Octopus	AllTandemRepeatsandHomopolymers	398944	422360	147916	124822	0.7406	0.7617	0.751	6
HG002+HG003+HG004	NovaSeq	30	FALSE	GT	GATK4	AllTandemRepeatsandHomopolymers	371875	371516	167808	155989	0.6889	0.7045	0.6966	6
HG002+HG003+HG004	NovaSeq	30	FALSE	GT	FreeBayes	AllTandemRepeatsandHomopolymers	350684	337161	271970	179349	0.5535	0.6616	0.6028	6
HG002+HG003+HG004	NovaSeq	30	FALSE	GT	Octopus	notinAllTandemRepeatsandHomopolymers	3555443	3557177	780715	863551	0.82	0.8046	0.8122	6
HG002+HG003+HG004	NovaSeq	30	FALSE	GT	GATK4	notinAllTandemRepeatsandHomopolymers	3349032	3349114	1182450	1070734	0.7391	0.7577	0.7483	6
HG002+HG003+HG004	NovaSeq	30	FALSE	GT	FreeBayes	notinAllTandemRepeatsandHomopolymers	3335780	3281111	2095528	1084987	0.6103	0.7546	0.6748	6
HG002+HG003+HG004	NovaSeq	40	FALSE	GT	Octopus	genome	4252234	4280462	705791	689378	0.8585	0.8605	0.8595	6
HG002+HG003+HG004	NovaSeq	40	FALSE	GT	GATK4	genome	3977773	3977201	1097261	969009	0.7838	0.8041	0.7938	6
HG002+HG003+HG004	NovaSeq	40	FALSE	GT	FreeBayes	genome	3930962	3856056	1640918	1019088	0.7015	0.7941	0.7449	6
HG002+HG003+HG004	NovaSeq	40	FALSE	GT	Octopus	alldifficult	921338	948431	228228	205019	0.806	0.818	0.812	6
HG002+HG003+HG004	NovaSeq	40	FALSE	GT	GATK4	alldifficult	857486	857092	327820	273294	0.7233	0.7583	0.7404	6
HG002+HG003+HG004	NovaSeq	40	FALSE	GT	FreeBayes	alldifficult	834376	807292	478850	298946	0.6277	0.7362	0.6776	6
HG002+HG003+HG004	NovaSeq	40	FALSE	GT	Octopus	alllowmapandsegdup	256122	256375	77643	79774	0.7675	0.7625	0.765	6
HG002+HG003+HG004	NovaSeq	40	FALSE	GT	GATK4	alllowmapandsegdup	236496	236552	130459	99482	0.6445	0.7039	0.6729	6
HG002+HG003+HG004	NovaSeq	40	FALSE	GT	FreeBayes	alllowmapandsegdup	237591	229979	158074	98583	0.5926	0.7068	0.6447	6
HG002+HG003+HG004	NovaSeq	40	FALSE	GT	Octopus	notinalldifficult	3331198	3332792	477844	484448	0.8746	0.873	0.8738	6
HG002+HG003+HG004	NovaSeq	40	FALSE	GT	GATK4	notinalldifficult	3120564	3120717	769580	695829	0.8022	0.8177	0.8099	6
HG002+HG003+HG004	NovaSeq	40	FALSE	GT	FreeBayes	notinalldifficult	3096862	3050014	1187456	720259	0.7198	0.8113	0.7628	6
HG002+HG003+HG004	NovaSeq	40	FALSE	GT	Octopus	notinalllowmapandsegdup	3995918	4024042	628252	609586	0.865	0.8676	0.8663	6
HG002+HG003+HG004	NovaSeq	40	FALSE	GT	GATK4	notinalllowmapandsegdup	3741098	3740587	966786	869494	0.7946	0.8114	0.8029	6
HG002+HG003+HG004	NovaSeq	40	FALSE	GT	FreeBayes	notinalllowmapandsegdup	3693213	3626157	1483619	920452	0.7097	0.8005	0.7523	6
HG002+HG003+HG004	NovaSeq	40	FALSE	GT	Octopus	AllTandemRepeatsandHomopolymers	432193	459104	116627	91110	0.7974	0.8259	0.8114	6
HG002+HG003+HG004	NovaSeq	40	FALSE	GT	GATK4	AllTandemRepeatsandHomopolymers	403139	402706	138851	124519	0.7436	0.764	0.7537	6
HG002+HG003+HG004	NovaSeq	40	FALSE	GT	FreeBayes	AllTandemRepeatsandHomopolymers	380515	365252	216995	149375	0.6273	0.7181	0.6696	6
HG002+HG003+HG004	NovaSeq	40	FALSE	GT	Octopus	notinAllTandemRepeatsandHomopolymers	3820516	3822190	589417	598394	0.8664	0.8646	0.8655	6
HG002+HG003+HG004	NovaSeq	40	FALSE	GT	GATK4	notinAllTandemRepeatsandHomopolymers	3575075	3575162	958597	844650	0.7886	0.8089	0.7986	6
HG002+HG003+HG004	NovaSeq	40	FALSE	GT	FreeBayes	notinAllTandemRepeatsandHomopolymers	3550884	3492061	1451267	869881	0.7064	0.8032	0.7517	6
HG002+HG003+HG004	NovaSeq	50	FALSE	GT	Octopus	genome	4425914	4456197	554290	514977	0.8894	0.8958	0.8926	6
HG002+HG003+HG004	NovaSeq	50	FALSE	GT	GATK4	genome	4157058	4156438	920652	789657	0.8187	0.8404	0.8294	6
HG002+HG003+HG004	NovaSeq	50	FALSE	GT	FreeBayes	genome	4100654	4021505	1273203	849256	0.7595	0.8284	0.7925	6
HG002+HG003+HG004	NovaSeq	50	FALSE	GT	Octopus	alldifficult	961578	990840	193791	164401	0.8364	0.854	0.8451	6
HG002+HG003+HG004	NovaSeq	50	FALSE	GT	GATK4	alldifficult	898687	898252	292040	232023	0.7546	0.7948	0.7742	6
HG002+HG003+HG004	NovaSeq	50	FALSE	GT	FreeBayes	alldifficult	873779	844844	403637	259436	0.6767	0.7711	0.7208	6
HG002+HG003+HG004	NovaSeq	50	FALSE	GT	Octopus	alllowmapandsegdup	266766	267047	73226	69132	0.7848	0.7942	0.7895	6
HG002+HG003+HG004	NovaSeq	50	FALSE	GT	GATK4	alllowmapandsegdup	246488	246536	126441	89500	0.661	0.7336	0.6954	6
HG002+HG003+HG004	NovaSeq	50	FALSE	GT	FreeBayes	alllowmapandsegdup	246966	239012	138462	89203	0.6332	0.7346	0.6802	6
HG002+HG003+HG004	NovaSeq	50	FALSE	GT	Octopus	notinalldifficult	3464669	3466164	360725	350635	0.9057	0.9081	0.9069	6
HG002+HG003+HG004	NovaSeq	50	FALSE	GT	GATK4	notinalldifficult	3258697	3258860	628692	557699	0.8383	0.8539	0.846	6
HG002+HG003+HG004	NovaSeq	50	FALSE	GT	FreeBayes	notinalldifficult	3227195	3177971	889797	589893	0.7813	0.8455	0.8121	6
HG002+HG003+HG004	NovaSeq	50	FALSE	GT	Octopus	notinalllowmapandsegdup	4158954	4189113	481170	445827	0.897	0.9032	0.9001	6
HG002+HG003+HG004	NovaSeq	50	FALSE	GT	GATK4	notinalllowmapandsegdup	3910393	3909836	794182	700123	0.8312	0.8481	0.8396	6
HG002+HG003+HG004	NovaSeq	50	FALSE	GT	FreeBayes	notinalllowmapandsegdup	3853526	3782583	1135395	760004	0.7691	0.8353	0.8008	6
HG002+HG003+HG004	NovaSeq	50	FALSE	GT	Octopus	AllTandemRepeatsandHomopolymers	452761	481842	94322	70216	0.8363	0.8657	0.8508	6
HG002+HG003+HG004	NovaSeq	50	FALSE	GT	GATK4	AllTandemRepeatsandHomopolymers	424911	424433	116899	102665	0.7841	0.8054	0.7946	6
HG002+HG003+HG004	NovaSeq	50	FALSE	GT	FreeBayes	AllTandemRepeatsandHomopolymers	401765	385180	182518	128035	0.6785	0.7583	0.7162	6
HG002+HG003+HG004	NovaSeq	50	FALSE	GT	Octopus	notinAllTandemRepeatsandHomopolymers	3973669	3975237	460169	444847	0.8963	0.8993	0.8978	6
HG002+HG003+HG004	NovaSeq	50	FALSE	GT	GATK4	notinAllTandemRepeatsandHomopolymers	3732652	3732749	803877	687088	0.8228	0.8445	0.8335	6
HG002+HG003+HG004	NovaSeq	50	FALSE	GT	FreeBayes	notinAllTandemRepeatsandHomopolymers	3699383	3637646	1112483	721330	0.7658	0.8368	0.7997	6
HG002+HG003+HG004	NovaSeq	60	FALSE	GT	Octopus	genome	4537376	4569102	448900	403105	0.9105	0.9184	0.9145	6
HG002+HG003+HG004	NovaSeq	60	FALSE	GT	GATK4	genome	4287848	4287183	781485	658841	0.8458	0.8668	0.8562	6
HG002+HG003+HG004	NovaSeq	60	FALSE	GT	FreeBayes	genome	4228923	4146740	1079160	720964	0.7935	0.8543	0.8228	6
HG002+HG003+HG004	NovaSeq	60	FALSE	GT	Octopus	alldifficult	987948	1018735	168837	137765	0.8578	0.8776	0.8676	6
HG002+HG003+HG004	NovaSeq	60	FALSE	GT	GATK4	alldifficult	929070	928594	262971	201625	0.7793	0.8217	0.7999	6
HG002+HG003+HG004	NovaSeq	60	FALSE	GT	FreeBayes	alldifficult	903264	873011	360221	229924	0.7079	0.7971	0.7499	6
HG002+HG003+HG004	NovaSeq	60	FALSE	GT	Octopus	alllowmapandsegdup	273478	273767	70482	62384	0.7953	0.8143	0.8046	6
HG002+HG003+HG004	NovaSeq	60	FALSE	GT	GATK4	alllowmapandsegdup	254006	254055	121467	81960	0.6765	0.756	0.7141	6
HG002+HG003+HG004	NovaSeq	60	FALSE	GT	FreeBayes	alllowmapandsegdup	253782	245588	127303	82374	0.6586	0.755	0.7035	6
HG002+HG003+HG004	NovaSeq	60	FALSE	GT	Octopus	notinalldifficult	3549777	3551193	280283	265382	0.9268	0.9304	0.9286	6
HG002+HG003+HG004	NovaSeq	60	FALSE	GT	GATK4	notinalldifficult	3359092	3359258	518609	457293	0.8663	0.8802	0.8732	6
HG002+HG003+HG004	NovaSeq	60	FALSE	GT	FreeBayes	notinalldifficult	3325994	3275082	735910	491099	0.8165	0.8713	0.843	6
HG002+HG003+HG004	NovaSeq	60	FALSE	GT	Octopus	notinalllowmapandsegdup	4263704	4295304	378537	340703	0.919	0.926	0.9225	6
HG002+HG003+HG004	NovaSeq	60	FALSE	GT	GATK4	notinalllowmapandsegdup	4033661	4033062	659993	576851	0.8594	0.8749	0.8671	6
HG002+HG003+HG004	NovaSeq	60	FALSE	GT	FreeBayes	notinalllowmapandsegdup	3974972	3901242	952417	638548	0.8038	0.8616	0.8317	6
HG002+HG003+HG004	NovaSeq	60	FALSE	GT	Octopus	AllTandemRepeatsandHomopolymers	466706	497329	77525	56068	0.8651	0.8927	0.8787	6
HG002+HG003+HG004	NovaSeq	60	FALSE	GT	GATK4	AllTandemRepeatsandHomopolymers	440799	440282	100593	86795	0.814	0.8355	0.8246	6
HG002+HG003+HG004	NovaSeq	60	FALSE	GT	FreeBayes	AllTandemRepeatsandHomopolymers	417595	400098	161897	112191	0.7119	0.7882	0.7481	6
HG002+HG003+HG004	NovaSeq	60	FALSE	GT	Octopus	notinAllTandemRepeatsandHomopolymers	4071212	4072679	371545	347096	0.9164	0.9214	0.9189	6
HG002+HG003+HG004	NovaSeq	60	FALSE	GT	GATK4	notinAllTandemRepeatsandHomopolymers	3847543	3847637	681026	572153	0.8496	0.8705	0.86	6
HG002+HG003+HG004	NovaSeq	60	FALSE	GT	FreeBayes	notinAllTandemRepeatsandHomopolymers	3811828	3747990	935576	608876	0.8002	0.8623	0.8301	6
HG002+HG003+HG004	NovaSeq	70	FALSE	GT	Octopus	genome	4615585	4648370	372617	325123	0.9258	0.9342	0.93	6
HG002+HG003+HG004	NovaSeq	70	FALSE	GT	GATK4	genome	4388143	4387460	672045	558467	0.8672	0.8871	0.877	6
HG002+HG003+HG004	NovaSeq	70	FALSE	GT	FreeBayes	genome	4327778	4243277	945091	622091	0.8178	0.8743	0.8451	6
HG002+HG003+HG004	NovaSeq	70	FALSE	GT	Octopus	alldifficult	1006910	1038838	150468	118801	0.8735	0.8945	0.8838	6
HG002+HG003+HG004	NovaSeq	70	FALSE	GT	GATK4	alldifficult	952463	951985	239458	178148	0.799	0.8424	0.8202	6
HG002+HG003+HG004	NovaSeq	70	FALSE	GT	FreeBayes	alldifficult	926206	894884	329832	206958	0.7307	0.8174	0.7716	6
HG002+HG003+HG004	NovaSeq	70	FALSE	GT	Octopus	alllowmapandsegdup	278209	278485	68513	57658	0.8026	0.8283	0.8152	6
HG002+HG003+HG004	NovaSeq	70	FALSE	GT	GATK4	alllowmapandsegdup	259646	259700	117047	76316	0.6893	0.7728	0.7287	6
HG002+HG003+HG004	NovaSeq	70	FALSE	GT	FreeBayes	alllowmapandsegdup	259030	250678	119922	77131	0.6764	0.7706	0.7204	6
HG002+HG003+HG004	NovaSeq	70	FALSE	GT	Octopus	notinalldifficult	3609028	3610383	222389	206360	0.942	0.9459	0.9439	6
HG002+HG003+HG004	NovaSeq	70	FALSE	GT	GATK4	notinalldifficult	3436022	3436195	432648	380368	0.8882	0.9003	0.8942	6
HG002+HG003+HG004	NovaSeq	70	FALSE	GT	FreeBayes	notinalldifficult	3401908	3349765	629803	415189	0.8417	0.8912	0.8658	6
HG002+HG003+HG004	NovaSeq	70	FALSE	GT	Octopus	notinalllowmapandsegdup	4337180	4369843	304242	267449	0.9349	0.9419	0.9384	6
HG002+HG003+HG004	NovaSeq	70	FALSE	GT	GATK4	notinalllowmapandsegdup	4128311	4127695	554976	482126	0.8815	0.8954	0.8884	6
HG002+HG003+HG004	NovaSeq	70	FALSE	GT	FreeBayes	notinalllowmapandsegdup	4068582	3992696	825674	544915	0.8286	0.8819	0.8544	6
HG002+HG003+HG004	NovaSeq	70	FALSE	GT	Octopus	AllTandemRepeatsandHomopolymers	476899	508673	64941	45836	0.8868	0.9123	0.8994	6
HG002+HG003+HG004	NovaSeq	70	FALSE	GT	GATK4	AllTandemRepeatsandHomopolymers	453516	452993	87032	73995	0.8388	0.8597	0.8492	6
HG002+HG003+HG004	NovaSeq	70	FALSE	GT	FreeBayes	AllTandemRepeatsandHomopolymers	430273	412011	146629	99487	0.7375	0.8122	0.7731	6
HG002+HG003+HG004	NovaSeq	70	FALSE	GT	Octopus	notinAllTandemRepeatsandHomopolymers	4139235	4140624	307846	279339	0.9308	0.9368	0.9338	6
HG002+HG003+HG004	NovaSeq	70	FALSE	GT	GATK4	notinAllTandemRepeatsandHomopolymers	3935145	3935242	585115	484555	0.8706	0.8904	0.8804	6
HG002+HG003+HG004	NovaSeq	70	FALSE	GT	FreeBayes	notinAllTandemRepeatsandHomopolymers	3898013	3832638	814116	522697	0.8248	0.8818	0.8523	6
HG002+HG003+HG004	NovaSeq	80	FALSE	GT	Octopus	genome	4671981	4705535	316257	268574	0.937	0.9456	0.9413	6
HG002+HG003+HG004	NovaSeq	80	FALSE	GT	GATK4	genome	4466658	4465926	587208	479956	0.8838	0.903	0.8933	6
HG002+HG003+HG004	NovaSeq	80	FALSE	GT	FreeBayes	genome	4405110	4318742	844942	544678	0.8364	0.89	0.8623	6
HG002+HG003+HG004	NovaSeq	80	FALSE	GT	Octopus	alldifficult	1021186	1053983	136423	104458	0.8854	0.9072	0.8962	6
HG002+HG003+HG004	NovaSeq	80	FALSE	GT	GATK4	alldifficult	970771	970243	220937	159837	0.8145	0.8586	0.836	6
HG002+HG003+HG004	NovaSeq	80	FALSE	GT	FreeBayes	alldifficult	944233	912172	306379	188850	0.7486	0.8333	0.7887	6
HG002+HG003+HG004	NovaSeq	80	FALSE	GT	Octopus	alllowmapandsegdup	281791	282070	66893	54064	0.8083	0.839	0.8234	6
HG002+HG003+HG004	NovaSeq	80	FALSE	GT	GATK4	alllowmapandsegdup	263914	263966	113601	72056	0.6991	0.7855	0.7398	6
HG002+HG003+HG004	NovaSeq	80	FALSE	GT	FreeBayes	alllowmapandsegdup	263166	254668	113954	72993	0.6909	0.7829	0.734	6
HG002+HG003+HG004	NovaSeq	80	FALSE	GT	Octopus	notinalldifficult	3651167	3652425	180043	164135	0.953	0.957	0.955	6
HG002+HG003+HG004	NovaSeq	80	FALSE	GT	GATK4	notinalldifficult	3496237	3496411	366321	320160	0.9052	0.9161	0.9106	6
HG002+HG003+HG004	NovaSeq	80	FALSE	GT	FreeBayes	notinalldifficult	3461236	3407955	551238	355861	0.8608	0.9068	0.8832	6
HG002+HG003+HG004	NovaSeq	80	FALSE	GT	Octopus	notinalllowmapandsegdup	4389993	4423429	249489	214495	0.9466	0.9534	0.95	6
HG002+HG003+HG004	NovaSeq	80	FALSE	GT	GATK4	notinalllowmapandsegdup	4202564	4201905	473577	407869	0.8987	0.9115	0.9051	6
HG002+HG003+HG004	NovaSeq	80	FALSE	GT	FreeBayes	notinalllowmapandsegdup	4141773	4064175	731452	471645	0.8475	0.8978	0.8719	6
HG002+HG003+HG004	NovaSeq	80	FALSE	GT	Octopus	AllTandemRepeatsandHomopolymers	484650	517298	55325	38050	0.9034	0.9272	0.9151	6
HG002+HG003+HG004	NovaSeq	80	FALSE	GT	GATK4	AllTandemRepeatsandHomopolymers	463356	462780	76578	64149	0.858	0.8784	0.8681	6
HG002+HG003+HG004	NovaSeq	80	FALSE	GT	FreeBayes	AllTandemRepeatsandHomopolymers	440234	421427	134795	89450	0.7577	0.8311	0.7927	6
HG002+HG003+HG004	NovaSeq	80	FALSE	GT	Octopus	notinAllTandemRepeatsandHomopolymers	4187897	4189185	261076	230559	0.9413	0.9478	0.9446	6
HG002+HG003+HG004	NovaSeq	80	FALSE	GT	GATK4	notinAllTandemRepeatsandHomopolymers	4003827	4003922	510723	415883	0.8869	0.9059	0.8963	6
HG002+HG003+HG004	NovaSeq	80	FALSE	GT	FreeBayes	notinAllTandemRepeatsandHomopolymers	3965407	3898694	723794	455298	0.8434	0.897	0.8694	6
HG002+HG003+HG004	NovaSeq	90	FALSE	GT	Octopus	genome	4713838	4747956	274454	226649	0.9454	0.9541	0.9497	6
HG002+HG003+HG004	NovaSeq	90	FALSE	GT	GATK4	genome	4530631	4529905	520169	415380	0.897	0.916	0.9064	6
HG002+HG003+HG004	NovaSeq	90	FALSE	GT	FreeBayes	genome	4467647	4379780	766359	482113	0.8511	0.9026	0.8761	6
HG002+HG003+HG004	NovaSeq	90	FALSE	GT	Octopus	alldifficult	1031357	1064760	126430	94274	0.8939	0.9162	0.9049	6
HG002+HG003+HG004	NovaSeq	90	FALSE	GT	GATK4	alldifficult	985480	984961	206418	144982	0.8267	0.8717	0.8486	6
HG002+HG003+HG004	NovaSeq	90	FALSE	GT	FreeBayes	alldifficult	959253	926579	287562	173808	0.7632	0.8466	0.8027	6
HG002+HG003+HG004	NovaSeq	90	FALSE	GT	Octopus	alllowmapandsegdup	284270	284555	65883	51554	0.812	0.8465	0.8289	6
HG002+HG003+HG004	NovaSeq	90	FALSE	GT	GATK4	alllowmapandsegdup	267546	267601	111123	68359	0.7066	0.7965	0.7489	6
HG002+HG003+HG004	NovaSeq	90	FALSE	GT	FreeBayes	alllowmapandsegdup	266770	258131	109289	69384	0.7026	0.7936	0.7453	6
HG002+HG003+HG004	NovaSeq	90	FALSE	GT	Octopus	notinalldifficult	3682863	3684091	148241	132384	0.9613	0.9653	0.9633	6
HG002+HG003+HG004	NovaSeq	90	FALSE	GT	GATK4	notinalldifficult	3545505	3545680	313801	270435	0.9187	0.9291	0.9239	6
HG002+HG003+HG004	NovaSeq	90	FALSE	GT	FreeBayes	notinalldifficult	3508760	3454610	489987	308331	0.8758	0.9192	0.897	6
HG002+HG003+HG004	NovaSeq	90	FALSE	GT	Octopus	notinalllowmapandsegdup	4429370	4463370	208716	175080	0.9553	0.962	0.9586	6
HG002+HG003+HG004	NovaSeq	90	FALSE	GT	GATK4	notinalllowmapandsegdup	4262897	4262245	409025	346998	0.9124	0.9247	0.9185	6
HG002+HG003+HG004	NovaSeq	90	FALSE	GT	FreeBayes	notinalllowmapandsegdup	4200702	4121746	657513	412693	0.8624	0.9105	0.8858	6
HG002+HG003+HG004	NovaSeq	90	FALSE	GT	Octopus	AllTandemRepeatsandHomopolymers	490060	523319	48488	32666	0.9152	0.9375	0.9262	6
HG002+HG003+HG004	NovaSeq	90	FALSE	GT	GATK4	AllTandemRepeatsandHomopolymers	471133	470563	68096	56305	0.8736	0.8932	0.8833	6
HG002+HG003+HG004	NovaSeq	90	FALSE	GT	FreeBayes	AllTandemRepeatsandHomopolymers	448279	429081	125298	81378	0.774	0.8464	0.8086	6
HG002+HG003+HG004	NovaSeq	90	FALSE	GT	Octopus	notinAllTandemRepeatsandHomopolymers	4224354	4225599	226123	194008	0.9492	0.9561	0.9526	6
HG002+HG003+HG004	NovaSeq	90	FALSE	GT	GATK4	notinAllTandemRepeatsandHomopolymers	4060028	4060125	452161	359146	0.8998	0.9187	0.9092	6
HG002+HG003+HG004	NovaSeq	90	FALSE	GT	FreeBayes	notinAllTandemRepeatsandHomopolymers	4019905	3952100	653112	400799	0.8582	0.9093	0.883	6
HG002+HG003+HG004	NovaSeq	100	FALSE	GT	Octopus	genome	4745966	4780498	242483	194471	0.9517	0.9606	0.9562	6
HG002+HG003+HG004	NovaSeq	100	FALSE	GT	GATK4	genome	4582951	4582203	466802	363046	0.9075	0.9266	0.917	6
HG002+HG003+HG004	NovaSeq	100	FALSE	GT	FreeBayes	genome	4518618	4429498	704629	431166	0.8628	0.9129	0.8871	6
HG002+HG003+HG004	NovaSeq	100	FALSE	GT	Octopus	alldifficult	1039304	1073186	118835	86282	0.9003	0.9233	0.9117	6
HG002+HG003+HG004	NovaSeq	100	FALSE	GT	GATK4	alldifficult	997605	997068	194976	132845	0.8364	0.8825	0.8588	6
HG002+HG003+HG004	NovaSeq	100	FALSE	GT	FreeBayes	alldifficult	971268	938083	272929	161811	0.7746	0.8572	0.8138	6
HG002+HG003+HG004	NovaSeq	100	FALSE	GT	Octopus	alllowmapandsegdup	286192	286481	65431	49659	0.8141	0.8521	0.8327	6
HG002+HG003+HG004	NovaSeq	100	FALSE	GT	GATK4	alllowmapandsegdup	270316	270374	109675	65589	0.7114	0.8047	0.7552	6
HG002+HG003+HG004	NovaSeq	100	FALSE	GT	FreeBayes	alllowmapandsegdup	269427	260680	105906	66729	0.7111	0.8015	0.7536	6
HG002+HG003+HG004	NovaSeq	100	FALSE	GT	Octopus	notinalldifficult	3707031	3708193	123879	108211	0.9677	0.9716	0.9697	6
HG002+HG003+HG004	NovaSeq	100	FALSE	GT	GATK4	notinalldifficult	3585707	3585879	271867	230231	0.9295	0.9397	0.9346	6
HG002+HG003+HG004	NovaSeq	100	FALSE	GT	FreeBayes	notinalldifficult	3547714	3492816	441794	269383	0.8877	0.9294	0.9081	6
HG002+HG003+HG004	NovaSeq	100	FALSE	GT	Octopus	notinalllowmapandsegdup	4459574	4493985	177194	144799	0.9621	0.9686	0.9653	6
HG002+HG003+HG004	NovaSeq	100	FALSE	GT	GATK4	notinalllowmapandsegdup	4312448	4311775	357105	297433	0.9235	0.9355	0.9295	6
HG002+HG003+HG004	NovaSeq	100	FALSE	GT	FreeBayes	notinalllowmapandsegdup	4249017	4168920	599126	364400	0.8743	0.921	0.8971	6
HG002+HG003+HG004	NovaSeq	100	FALSE	GT	Octopus	AllTandemRepeatsandHomopolymers	494544	528287	42750	28129	0.9251	0.9462	0.9355	6
HG002+HG003+HG004	NovaSeq	100	FALSE	GT	GATK4	AllTandemRepeatsandHomopolymers	477774	477183	61017	49658	0.8866	0.9058	0.8961	6
HG002+HG003+HG004	NovaSeq	100	FALSE	GT	FreeBayes	AllTandemRepeatsandHomopolymers	454937	435409	117732	74741	0.7872	0.8589	0.8215	6
HG002+HG003+HG004	NovaSeq	100	FALSE	GT	Octopus	notinAllTandemRepeatsandHomopolymers	4251986	4253161	199898	166379	0.9551	0.9623	0.9587	6
HG002+HG003+HG004	NovaSeq	100	FALSE	GT	GATK4	notinAllTandemRepeatsandHomopolymers	4105719	4105814	405863	313447	0.91	0.9291	0.9195	6
HG002+HG003+HG004	NovaSeq	100	FALSE	GT	FreeBayes	notinAllTandemRepeatsandHomopolymers	4064223	3995483	597804	356484	0.8699	0.9194	0.8939	6
HG003+HG004	NovaSeq	10	FALSE	GT	Octopus	genome	3144661	3164469	1013396	1865407	0.7574	0.6277	0.6865	4
HG003+HG004	NovaSeq	10	FALSE	GT	GATK4	genome	3230885	3230499	1290034	1779205	0.7146	0.6449	0.678	4
HG003+HG004	NovaSeq	10	FALSE	GT	FreeBayes	genome	3230544	3172271	1907626	1779625	0.6245	0.6448	0.6345	4
HG003+HG004	NovaSeq	10	FALSE	GT	Octopus	alldifficult	686906	705197	287754	489237	0.7102	0.584	0.641	4
HG003+HG004	NovaSeq	10	FALSE	GT	GATK4	alldifficult	684788	684542	334712	491367	0.6716	0.5822	0.6237	4
HG003+HG004	NovaSeq	10	FALSE	GT	FreeBayes	alldifficult	677794	657132	490879	498432	0.5724	0.5762	0.5743	4
HG003+HG004	NovaSeq	10	FALSE	GT	Octopus	alllowmapandsegdup	187919	188172	71765	158902	0.7239	0.5418	0.6198	4
HG003+HG004	NovaSeq	10	FALSE	GT	GATK4	alllowmapandsegdup	191687	191731	99897	155129	0.6575	0.5527	0.6005	4
HG003+HG004	NovaSeq	10	FALSE	GT	FreeBayes	alllowmapandsegdup	197140	190903	140135	149684	0.5767	0.5684	0.5725	4
HG003+HG004	NovaSeq	10	FALSE	GT	Octopus	notinalldifficult	2457988	2459819	725714	1376337	0.7722	0.641	0.7005	4
HG003+HG004	NovaSeq	10	FALSE	GT	GATK4	notinalldifficult	2546307	2546418	955444	1288028	0.7272	0.6641	0.6942	4
HG003+HG004	NovaSeq	10	FALSE	GT	FreeBayes	notinalldifficult	2552942	2516112	1451557	1281401	0.6342	0.6658	0.6496	4
HG003+HG004	NovaSeq	10	FALSE	GT	Octopus	notinalllowmapandsegdup	2956588	2976259	941603	1706442	0.7597	0.634	0.6912	4
HG003+HG004	NovaSeq	10	FALSE	GT	GATK4	notinalllowmapandsegdup	3039054	3038713	1190094	1624003	0.7186	0.6517	0.6835	4
HG003+HG004	NovaSeq	10	FALSE	GT	FreeBayes	notinalllowmapandsegdup	3033262	2981416	1768141	1629866	0.6277	0.6505	0.6389	4
HG003+HG004	NovaSeq	10	FALSE	GT	Octopus	AllTandemRepeatsandHomopolymers	325862	343890	166670	235269	0.6736	0.5807	0.6237	4
HG003+HG004	NovaSeq	10	FALSE	GT	GATK4	AllTandemRepeatsandHomopolymers	314588	314304	166463	246557	0.6538	0.5606	0.6036	4
HG003+HG004	NovaSeq	10	FALSE	GT	FreeBayes	AllTandemRepeatsandHomopolymers	301444	290457	236645	259760	0.551	0.5371	0.544	4
HG003+HG004	NovaSeq	10	FALSE	GT	Octopus	notinAllTandemRepeatsandHomopolymers	2819163	2821176	846824	1630396	0.7691	0.6336	0.6948	4
HG003+HG004	NovaSeq	10	FALSE	GT	GATK4	notinAllTandemRepeatsandHomopolymers	2916633	2916693	1123739	1532934	0.7219	0.6555	0.6871	4
HG003+HG004	NovaSeq	10	FALSE	GT	FreeBayes	notinAllTandemRepeatsandHomopolymers	2929410	2882787	1708635	1520177	0.6279	0.6584	0.6427	4
HG003+HG004	NovaSeq	20	FALSE	GT	Octopus	genome	4259859	4295366	542080	749929	0.8879	0.8503	0.8687	4
HG003+HG004	NovaSeq	20	FALSE	GT	GATK4	genome	4179161	4178349	840597	830854	0.8325	0.8342	0.8333	4
HG003+HG004	NovaSeq	20	FALSE	GT	FreeBayes	genome	4157103	4074264	1663373	853066	0.7101	0.8297	0.7653	4
HG003+HG004	NovaSeq	20	FALSE	GT	Octopus	alldifficult	949509	983495	181353	226512	0.8443	0.8074	0.8254	4
HG003+HG004	NovaSeq	20	FALSE	GT	GATK4	alldifficult	920179	919581	251971	255907	0.7849	0.7824	0.7837	4
HG003+HG004	NovaSeq	20	FALSE	GT	FreeBayes	alldifficult	901852	869954	454208	274374	0.657	0.7667	0.7076	4
HG003+HG004	NovaSeq	20	FALSE	GT	Octopus	alllowmapandsegdup	258261	258612	53214	88550	0.8293	0.7447	0.7847	4
HG003+HG004	NovaSeq	20	FALSE	GT	GATK4	alllowmapandsegdup	253219	253273	92340	93597	0.7328	0.7301	0.7315	4
HG003+HG004	NovaSeq	20	FALSE	GT	FreeBayes	alllowmapandsegdup	257699	249102	143719	89125	0.6341	0.743	0.6843	4
HG003+HG004	NovaSeq	20	FALSE	GT	Octopus	notinalldifficult	3310655	3312635	360839	523512	0.9018	0.8635	0.8822	4
HG003+HG004	NovaSeq	20	FALSE	GT	GATK4	notinalldifficult	3259294	3259445	588730	575035	0.847	0.85	0.8485	4
HG003+HG004	NovaSeq	20	FALSE	GT	FreeBayes	notinalldifficult	3255549	3205733	1236904	578794	0.7216	0.8491	0.7801	4
HG003+HG004	NovaSeq	20	FALSE	GT	Octopus	notinalllowmapandsegdup	4001400	4036705	488880	661360	0.892	0.8582	0.8747	4
HG003+HG004	NovaSeq	20	FALSE	GT	GATK4	notinalllowmapandsegdup	3925753	3925014	748244	737229	0.8399	0.8419	0.8409	4
HG003+HG004	NovaSeq	20	FALSE	GT	FreeBayes	notinalllowmapandsegdup	3899222	3825241	1520320	763906	0.7156	0.8362	0.7712	4
HG003+HG004	NovaSeq	20	FALSE	GT	Octopus	AllTandemRepeatsandHomopolymers	458972	492703	103583	102053	0.8263	0.8181	0.8222	4
HG003+HG004	NovaSeq	20	FALSE	GT	GATK4	AllTandemRepeatsandHomopolymers	439250	438605	115582	121822	0.7914	0.7829	0.7871	4
HG003+HG004	NovaSeq	20	FALSE	GT	FreeBayes	AllTandemRepeatsandHomopolymers	416525	397827	208274	144679	0.6564	0.7422	0.6967	4
HG003+HG004	NovaSeq	20	FALSE	GT	Octopus	notinAllTandemRepeatsandHomopolymers	3801395	3803525	438599	647990	0.8966	0.8544	0.875	4
HG003+HG004	NovaSeq	20	FALSE	GT	GATK4	notinAllTandemRepeatsandHomopolymers	3740412	3740491	725143	709153	0.8376	0.8406	0.8391	4
HG003+HG004	NovaSeq	20	FALSE	GT	FreeBayes	notinAllTandemRepeatsandHomopolymers	3741052	3677879	1484962	708535	0.7124	0.8408	0.7713	4
HG003+HG004	NovaSeq	30	FALSE	GT	Octopus	genome	4660726	4704251	325252	349032	0.9353	0.9303	0.9328	4
HG003+HG004	NovaSeq	30	FALSE	GT	GATK4	genome	4496079	4495071	576103	513907	0.8864	0.8974	0.8919	4
HG003+HG004	NovaSeq	30	FALSE	GT	FreeBayes	genome	4460647	4368253	1194802	549505	0.7852	0.8903	0.8345	4
HG003+HG004	NovaSeq	30	FALSE	GT	Octopus	alldifficult	1048045	1090222	125134	127939	0.897	0.8912	0.8941	4
HG003+HG004	NovaSeq	30	FALSE	GT	GATK4	alldifficult	1004519	1003756	196269	171545	0.8364	0.8541	0.8452	4
HG003+HG004	NovaSeq	30	FALSE	GT	FreeBayes	alldifficult	983056	946379	352582	193155	0.7286	0.8358	0.7785	4
HG003+HG004	NovaSeq	30	FALSE	GT	Octopus	alllowmapandsegdup	286743	287136	46432	60073	0.8608	0.8268	0.8435	4
HG003+HG004	NovaSeq	30	FALSE	GT	GATK4	alllowmapandsegdup	274522	274581	86690	72294	0.76	0.7915	0.7755	4
HG003+HG004	NovaSeq	30	FALSE	GT	FreeBayes	alllowmapandsegdup	277373	267904	122205	69451	0.6867	0.7998	0.739	4
HG003+HG004	NovaSeq	30	FALSE	GT	Octopus	notinalldifficult	3613047	3614927	200246	221127	0.9475	0.9423	0.9449	4
HG003+HG004	NovaSeq	30	FALSE	GT	GATK4	notinalldifficult	3491907	3492066	379908	342415	0.9019	0.9107	0.9063	4
HG003+HG004	NovaSeq	30	FALSE	GT	FreeBayes	notinalldifficult	3477961	3423519	863288	356380	0.7986	0.9071	0.8494	4
HG003+HG004	NovaSeq	30	FALSE	GT	Octopus	notinalllowmapandsegdup	4373778	4417088	278872	288947	0.9406	0.938	0.9393	4
HG003+HG004	NovaSeq	30	FALSE	GT	GATK4	notinalllowmapandsegdup	4221357	4220436	489398	441596	0.8961	0.9053	0.9007	4
HG003+HG004	NovaSeq	30	FALSE	GT	FreeBayes	notinalllowmapandsegdup	4183090	4100466	1073149	480021	0.7926	0.8971	0.8416	4
HG003+HG004	NovaSeq	30	FALSE	GT	Octopus	AllTandemRepeatsandHomopolymers	508945	550924	64626	52038	0.895	0.9072	0.9011	4
HG003+HG004	NovaSeq	30	FALSE	GT	GATK4	AllTandemRepeatsandHomopolymers	486413	485595	79594	74638	0.8592	0.867	0.8631	4
HG003+HG004	NovaSeq	30	FALSE	GT	FreeBayes	AllTandemRepeatsandHomopolymers	462857	440656	158286	98333	0.7357	0.8248	0.7777	4
HG003+HG004	NovaSeq	30	FALSE	GT	Octopus	notinAllTandemRepeatsandHomopolymers	4152358	4154309	260727	297039	0.9409	0.9332	0.9371	4
HG003+HG004	NovaSeq	30	FALSE	GT	GATK4	notinAllTandemRepeatsandHomopolymers	4010221	4010302	496606	439336	0.8898	0.9013	0.8955	4
HG003+HG004	NovaSeq	30	FALSE	GT	FreeBayes	notinAllTandemRepeatsandHomopolymers	3998337	3929239	1059080	451247	0.7877	0.8986	0.8395	4
HG003+HG004	NovaSeq	40	FALSE	GT	Octopus	genome	4803184	4850172	217119	206527	0.9572	0.9588	0.958	4
HG003+HG004	NovaSeq	40	FALSE	GT	GATK4	genome	4655443	4654340	422342	354523	0.9168	0.9292	0.923	4
HG003+HG004	NovaSeq	40	FALSE	GT	FreeBayes	genome	4613066	4516131	758029	397079	0.8563	0.9207	0.8873	4
HG003+HG004	NovaSeq	40	FALSE	GT	Octopus	alldifficult	1086744	1132555	95663	89232	0.9221	0.9241	0.9231	4
HG003+HG004	NovaSeq	40	FALSE	GT	GATK4	alldifficult	1047039	1046186	162034	129005	0.8659	0.8903	0.8779	4
HG003+HG004	NovaSeq	40	FALSE	GT	FreeBayes	alldifficult	1024504	985350	264878	151700	0.7881	0.871	0.8275	4
HG003+HG004	NovaSeq	40	FALSE	GT	Octopus	alllowmapandsegdup	297879	298303	43489	48923	0.8728	0.8589	0.8658	4
HG003+HG004	NovaSeq	40	FALSE	GT	GATK4	alllowmapandsegdup	285184	285244	82016	61628	0.7767	0.8223	0.7988	4
HG003+HG004	NovaSeq	40	FALSE	GT	FreeBayes	alllowmapandsegdup	286655	276805	99076	60169	0.7364	0.8265	0.7789	4
HG003+HG004	NovaSeq	40	FALSE	GT	Octopus	notinalldifficult	3716831	3718574	121536	117304	0.9684	0.9694	0.9689	4
HG003+HG004	NovaSeq	40	FALSE	GT	GATK4	notinalldifficult	3608785	3608954	260336	225537	0.9327	0.9412	0.9369	4
HG003+HG004	NovaSeq	40	FALSE	GT	FreeBayes	notinalldifficult	3588960	3532476	508181	245381	0.8742	0.936	0.9041	4
HG003+HG004	NovaSeq	40	FALSE	GT	Octopus	notinalllowmapandsegdup	4505098	4551851	173676	157594	0.9632	0.9662	0.9647	4
HG003+HG004	NovaSeq	40	FALSE	GT	GATK4	notinalllowmapandsegdup	4370055	4369042	340310	292882	0.9277	0.9372	0.9324	4
HG003+HG004	NovaSeq	40	FALSE	GT	FreeBayes	notinalllowmapandsegdup	4326224	4239446	659388	336880	0.8654	0.9278	0.8955	4
HG003+HG004	NovaSeq	40	FALSE	GT	Octopus	AllTandemRepeatsandHomopolymers	529251	574872	43552	31745	0.9296	0.9434	0.9364	4
HG003+HG004	NovaSeq	40	FALSE	GT	GATK4	AllTandemRepeatsandHomopolymers	510235	509338	57896	50800	0.8979	0.9095	0.9037	4
HG003+HG004	NovaSeq	40	FALSE	GT	FreeBayes	AllTandemRepeatsandHomopolymers	487570	463439	117496	73613	0.7977	0.8688	0.8318	4
HG003+HG004	NovaSeq	40	FALSE	GT	Octopus	notinAllTandemRepeatsandHomopolymers	4274537	4276339	173626	174800	0.961	0.9607	0.9608	4
HG003+HG004	NovaSeq	40	FALSE	GT	GATK4	notinAllTandemRepeatsandHomopolymers	4145797	4145877	364502	303756	0.9192	0.9317	0.9254	4
HG003+HG004	NovaSeq	40	FALSE	GT	FreeBayes	notinAllTandemRepeatsandHomopolymers	4126077	4054378	656662	323507	0.8606	0.9273	0.8927	4
HG003+HG004	NovaSeq	50	FALSE	GT	Octopus	genome	4868046	4916757	158150	141494	0.9688	0.9718	0.9703	4
HG003+HG004	NovaSeq	50	FALSE	GT	GATK4	genome	4748878	4747731	325483	261081	0.9358	0.9479	0.9418	4
HG003+HG004	NovaSeq	50	FALSE	GT	FreeBayes	genome	4706617	4606663	553795	303535	0.8927	0.9394	0.9155	4
HG003+HG004	NovaSeq	50	FALSE	GT	Octopus	alldifficult	1105975	1153624	78868	69962	0.936	0.9405	0.9383	4
HG003+HG004	NovaSeq	50	FALSE	GT	GATK4	alldifficult	1071549	1070655	139808	104488	0.8845	0.9112	0.8976	4
HG003+HG004	NovaSeq	50	FALSE	GT	FreeBayes	alldifficult	1050604	1009722	218420	125607	0.8222	0.8932	0.8562	4
HG003+HG004	NovaSeq	50	FALSE	GT	Octopus	alllowmapandsegdup	303539	303979	41950	43260	0.8787	0.8753	0.877	4
HG003+HG004	NovaSeq	50	FALSE	GT	GATK4	alllowmapandsegdup	291259	291316	78328	55553	0.7881	0.8398	0.8131	4
HG003+HG004	NovaSeq	50	FALSE	GT	FreeBayes	alllowmapandsegdup	292201	282129	86859	54623	0.7646	0.8425	0.8017	4
HG003+HG004	NovaSeq	50	FALSE	GT	Octopus	notinalldifficult	3762456	3764090	79372	71547	0.9793	0.9813	0.9803	4
HG003+HG004	NovaSeq	50	FALSE	GT	GATK4	notinalldifficult	3677720	3677895	185685	156601	0.9519	0.9592	0.9555	4
HG003+HG004	NovaSeq	50	FALSE	GT	FreeBayes	notinalldifficult	3656415	3598653	346325	177926	0.9122	0.9536	0.9324	4
HG003+HG004	NovaSeq	50	FALSE	GT	Octopus	notinalllowmapandsegdup	4564294	4612760	116260	98230	0.9754	0.9789	0.9772	4
HG003+HG004	NovaSeq	50	FALSE	GT	GATK4	notinalllowmapandsegdup	4457415	4456362	247139	205515	0.9475	0.9559	0.9517	4
HG003+HG004	NovaSeq	50	FALSE	GT	FreeBayes	notinalllowmapandsegdup	4414228	4324664	467282	248883	0.9025	0.9466	0.924	4
HG003+HG004	NovaSeq	50	FALSE	GT	Octopus	AllTandemRepeatsandHomopolymers	539726	587193	31156	21246	0.9496	0.9621	0.9558	4
HG003+HG004	NovaSeq	50	FALSE	GT	GATK4	AllTandemRepeatsandHomopolymers	523924	522987	44567	37104	0.9215	0.9339	0.9276	4
HG003+HG004	NovaSeq	50	FALSE	GT	FreeBayes	AllTandemRepeatsandHomopolymers	503537	478050	94455	57653	0.835	0.8973	0.865	4
HG003+HG004	NovaSeq	50	FALSE	GT	Octopus	notinAllTandemRepeatsandHomopolymers	4328922	4330607	127052	120268	0.9715	0.973	0.9722	4
HG003+HG004	NovaSeq	50	FALSE	GT	GATK4	notinAllTandemRepeatsandHomopolymers	4225548	4225632	280955	224004	0.9377	0.9497	0.9436	4
HG003+HG004	NovaSeq	50	FALSE	GT	FreeBayes	notinAllTandemRepeatsandHomopolymers	4203664	4130320	471111	245920	0.8976	0.9447	0.9206	4
HG003+HG004	NovaSeq	60	FALSE	GT	Octopus	genome	4903667	4953431	124384	105778	0.9755	0.9789	0.9772	4
HG003+HG004	NovaSeq	60	FALSE	GT	GATK4	genome	4810295	4809133	264044	199670	0.948	0.9601	0.954	4
HG003+HG004	NovaSeq	60	FALSE	GT	FreeBayes	genome	4768732	4667156	455132	241425	0.9111	0.9518	0.931	4
HG003+HG004	NovaSeq	60	FALSE	GT	Octopus	alldifficult	1116773	1165527	69614	59101	0.9436	0.9497	0.9467	4
HG003+HG004	NovaSeq	60	FALSE	GT	GATK4	alldifficult	1088439	1087534	125290	87604	0.8967	0.9255	0.9109	4
HG003+HG004	NovaSeq	60	FALSE	GT	FreeBayes	alldifficult	1068117	1026352	193076	108097	0.8417	0.9081	0.8736	4
HG003+HG004	NovaSeq	60	FALSE	GT	Octopus	alllowmapandsegdup	306774	307226	41541	40018	0.8809	0.8846	0.8827	4
HG003+HG004	NovaSeq	60	FALSE	GT	GATK4	alllowmapandsegdup	295699	295756	76253	51113	0.795	0.8526	0.8228	4
HG003+HG004	NovaSeq	60	FALSE	GT	FreeBayes	alllowmapandsegdup	296238	285995	80410	50586	0.7805	0.8541	0.8157	4
HG003+HG004	NovaSeq	60	FALSE	GT	Octopus	notinalldifficult	3787281	3788858	54853	46690	0.9857	0.9878	0.9868	4
HG003+HG004	NovaSeq	60	FALSE	GT	GATK4	notinalldifficult	3722244	3722418	138763	112077	0.9641	0.9708	0.9674	4
HG003+HG004	NovaSeq	60	FALSE	GT	FreeBayes	notinalldifficult	3701011	3642506	270766	133332	0.9308	0.9652	0.9477	4
HG003+HG004	NovaSeq	60	FALSE	GT	Octopus	notinalllowmapandsegdup	4596678	4646183	82894	65758	0.9825	0.9859	0.9842	4
HG003+HG004	NovaSeq	60	FALSE	GT	GATK4	notinalllowmapandsegdup	4514388	4513320	187779	148548	0.9601	0.9681	0.9641	4
HG003+HG004	NovaSeq	60	FALSE	GT	FreeBayes	notinalllowmapandsegdup	4472295	4381286	375027	190821	0.9212	0.9591	0.9397	4
HG003+HG004	NovaSeq	60	FALSE	GT	Octopus	AllTandemRepeatsandHomopolymers	545671	594253	23780	15300	0.9615	0.9727	0.9671	4
HG003+HG004	NovaSeq	60	FALSE	GT	GATK4	AllTandemRepeatsandHomopolymers	533214	532263	35291	27820	0.9378	0.9504	0.9441	4
HG003+HG004	NovaSeq	60	FALSE	GT	FreeBayes	AllTandemRepeatsandHomopolymers	513894	487748	81391	47298	0.857	0.9157	0.8854	4
HG003+HG004	NovaSeq	60	FALSE	GT	Octopus	notinAllTandemRepeatsandHomopolymers	4358601	4360222	100662	90495	0.9774	0.9797	0.9785	4
HG003+HG004	NovaSeq	60	FALSE	GT	GATK4	notinAllTandemRepeatsandHomopolymers	4277676	4277758	228784	171876	0.9492	0.9614	0.9553	4
HG003+HG004	NovaSeq	60	FALSE	GT	FreeBayes	notinAllTandemRepeatsandHomopolymers	4255433	4181122	383098	194154	0.9161	0.9564	0.9358	4
HG003+HG004	NovaSeq	70	FALSE	GT	Octopus	genome	4925270	4975462	103725	84201	0.9796	0.9832	0.9814	4
HG003+HG004	NovaSeq	70	FALSE	GT	GATK4	genome	4851327	4850157	224192	158632	0.9558	0.9683	0.962	4
HG003+HG004	NovaSeq	70	FALSE	GT	FreeBayes	genome	4811279	4708515	392289	198878	0.9231	0.9603	0.9413	4
HG003+HG004	NovaSeq	70	FALSE	GT	Octopus	alldifficult	1123570	1172814	63628	52349	0.9485	0.9555	0.952	4
HG003+HG004	NovaSeq	70	FALSE	GT	GATK4	alldifficult	1098980	1098070	116501	77059	0.9041	0.9345	0.919	4
HG003+HG004	NovaSeq	70	FALSE	GT	FreeBayes	alldifficult	1080162	1037743	176346	96052	0.8548	0.9183	0.8854	4
HG003+HG004	NovaSeq	70	FALSE	GT	Octopus	alllowmapandsegdup	308784	309235	41474	38012	0.8817	0.8904	0.886	4
HG003+HG004	NovaSeq	70	FALSE	GT	GATK4	alllowmapandsegdup	298537	298596	75449	48275	0.7983	0.8608	0.8284	4
HG003+HG004	NovaSeq	70	FALSE	GT	FreeBayes	alllowmapandsegdup	298930	288578	76328	47894	0.7908	0.8619	0.8248	4
HG003+HG004	NovaSeq	70	FALSE	GT	Octopus	notinalldifficult	3802092	3803612	40170	31860	0.9895	0.9917	0.9906	4
HG003+HG004	NovaSeq	70	FALSE	GT	GATK4	notinalldifficult	3752736	3752912	107697	81583	0.9721	0.9787	0.9754	4
HG003+HG004	NovaSeq	70	FALSE	GT	FreeBayes	notinalldifficult	3731516	3672474	223092	102827	0.9427	0.9732	0.9577	4
HG003+HG004	NovaSeq	70	FALSE	GT	Octopus	notinalllowmapandsegdup	4616267	4666209	62301	46191	0.9868	0.9901	0.9885	4
HG003+HG004	NovaSeq	70	FALSE	GT	GATK4	notinalllowmapandsegdup	4552583	4551511	148731	110347	0.9684	0.9763	0.9723	4
HG003+HG004	NovaSeq	70	FALSE	GT	FreeBayes	notinalllowmapandsegdup	4512149	4420065	316240	150967	0.9332	0.9676	0.9501	4
HG003+HG004	NovaSeq	70	FALSE	GT	Octopus	AllTandemRepeatsandHomopolymers	549403	598493	18848	11558	0.9695	0.9794	0.9744	4
HG003+HG004	NovaSeq	70	FALSE	GT	GATK4	AllTandemRepeatsandHomopolymers	539035	538077	29197	21995	0.9485	0.9608	0.9546	4
HG003+HG004	NovaSeq	70	FALSE	GT	FreeBayes	AllTandemRepeatsandHomopolymers	521202	494550	72402	39990	0.8723	0.9287	0.8996	4
HG003+HG004	NovaSeq	70	FALSE	GT	Octopus	notinAllTandemRepeatsandHomopolymers	4376478	4378024	84932	72654	0.981	0.9837	0.9823	4
HG003+HG004	NovaSeq	70	FALSE	GT	GATK4	notinAllTandemRepeatsandHomopolymers	4312888	4312968	195024	136662	0.9567	0.9693	0.963	4
HG003+HG004	NovaSeq	70	FALSE	GT	FreeBayes	notinAllTandemRepeatsandHomopolymers	4290673	4215678	327551	158914	0.9279	0.9643	0.9457	4
HG002	NovaSeq	10	FALSE	GT	Octopus	genome	3685900	3711736	69056	204624	0.9817	0.9474	0.9643	2
HG002	NovaSeq	10	FALSE	GT	GATK4	genome	3687589	3687525	128669	202935	0.9663	0.9478	0.957	2
HG002	NovaSeq	10	FALSE	GT	FreeBayes	genome	3688892	3613027	515632	201632	0.8751	0.9482	0.9102	2
HG002	NovaSeq	10	FALSE	GT	Octopus	alldifficult	899516	924177	39327	97096	0.9592	0.9026	0.93	2
HG002	NovaSeq	10	FALSE	GT	GATK4	alldifficult	889652	889755	61460	106960	0.9354	0.8927	0.9135	2
HG002	NovaSeq	10	FALSE	GT	FreeBayes	alldifficult	881678	849708	179714	114934	0.8254	0.8847	0.854	2
HG002	NovaSeq	10	FALSE	GT	Octopus	alllowmapandsegdup	231514	231918	13305	45195	0.9457	0.8367	0.8879	2
HG002	NovaSeq	10	FALSE	GT	GATK4	alllowmapandsegdup	229688	229755	29307	47021	0.8869	0.8301	0.8575	2
HG002	NovaSeq	10	FALSE	GT	FreeBayes	alllowmapandsegdup	235688	227328	57441	41021	0.7983	0.8518	0.8242	2
HG002	NovaSeq	10	FALSE	GT	Octopus	notinalldifficult	2786556	2788149	29732	107539	0.9894	0.9628	0.976	2
HG002	NovaSeq	10	FALSE	GT	GATK4	notinalldifficult	2798106	2798277	67224	95989	0.9765	0.9668	0.9717	2
HG002	NovaSeq	10	FALSE	GT	FreeBayes	notinalldifficult	2807383	2764656	346018	86712	0.8888	0.97	0.9276	2
HG002	NovaSeq	10	FALSE	GT	Octopus	notinalllowmapandsegdup	3454196	3479787	55747	159417	0.9842	0.9559	0.9699	2
HG002	NovaSeq	10	FALSE	GT	GATK4	notinalllowmapandsegdup	3457703	3457700	99361	155910	0.9721	0.9569	0.9644	2
HG002	NovaSeq	10	FALSE	GT	FreeBayes	notinalllowmapandsegdup	3453000	3385752	458504	160613	0.8807	0.9556	0.9166	2
HG002	NovaSeq	10	FALSE	GT	Octopus	AllTandemRepeatsandHomopolymers	477821	502280	24423	43961	0.9536	0.9157	0.9343	2
HG002	NovaSeq	10	FALSE	GT	GATK4	AllTandemRepeatsandHomopolymers	468168	468240	28129	53614	0.9433	0.8972	0.9197	2
HG002	NovaSeq	10	FALSE	GT	FreeBayes	AllTandemRepeatsandHomopolymers	453412	434004	94965	68370	0.8205	0.869	0.844	2
HG002	NovaSeq	10	FALSE	GT	Octopus	notinAllTandemRepeatsandHomopolymers	3208461	3210180	44638	160698	0.9863	0.9523	0.969	2
HG002	NovaSeq	10	FALSE	GT	GATK4	notinAllTandemRepeatsandHomopolymers	3219798	3219900	100571	149361	0.9697	0.9557	0.9626	2
HG002	NovaSeq	10	FALSE	GT	FreeBayes	notinAllTandemRepeatsandHomopolymers	3235850	3180464	431505	133309	0.8805	0.9604	0.9187	2
HG002	NovaSeq	20	FALSE	GT	Octopus	genome	3846037	3877553	26297	44487	0.9933	0.9886	0.9909	2
HG002	NovaSeq	20	FALSE	GT	GATK4	genome	3844056	3843985	61056	46468	0.9844	0.9881	0.9862	2
HG002	NovaSeq	20	FALSE	GT	FreeBayes	genome	3832753	3749996	274947	57771	0.9317	0.9852	0.9577	2
HG002	NovaSeq	20	FALSE	GT	Octopus	alldifficult	960672	990961	21163	35940	0.9791	0.9639	0.9715	2
HG002	NovaSeq	20	FALSE	GT	GATK4	alldifficult	956732	956829	43045	39880	0.9569	0.96	0.9585	2
HG002	NovaSeq	20	FALSE	GT	FreeBayes	alldifficult	946604	909978	114285	50008	0.8884	0.9498	0.9181	2
HG002	NovaSeq	20	FALSE	GT	Octopus	alllowmapandsegdup	248850	249327	13828	27859	0.9475	0.8993	0.9228	2
HG002	NovaSeq	20	FALSE	GT	GATK4	alllowmapandsegdup	247370	247439	31174	29339	0.8881	0.894	0.891	2
HG002	NovaSeq	20	FALSE	GT	FreeBayes	alllowmapandsegdup	250914	241656	45450	25795	0.8417	0.9068	0.873	2
HG002	NovaSeq	20	FALSE	GT	Octopus	notinalldifficult	2885545	2887254	5144	8550	0.9982	0.997	0.9976	2
HG002	NovaSeq	20	FALSE	GT	GATK4	notinalldifficult	2887508	2887694	18014	6587	0.9938	0.9977	0.9958	2
HG002	NovaSeq	20	FALSE	GT	FreeBayes	notinalldifficult	2886360	2841467	166650	7735	0.9446	0.9973	0.9702	2
HG002	NovaSeq	20	FALSE	GT	Octopus	notinalllowmapandsegdup	3596984	3628200	12474	16629	0.9966	0.9954	0.996	2
HG002	NovaSeq	20	FALSE	GT	GATK4	notinalllowmapandsegdup	3596482	3596478	29893	17131	0.9918	0.9953	0.9935	2
HG002	NovaSeq	20	FALSE	GT	FreeBayes	notinalllowmapandsegdup	3581631	3508418	229727	31982	0.9385	0.9911	0.9641	2
HG002	NovaSeq	20	FALSE	GT	Octopus	AllTandemRepeatsandHomopolymers	514681	544767	7515	7101	0.9864	0.9864	0.9864	2
HG002	NovaSeq	20	FALSE	GT	GATK4	AllTandemRepeatsandHomopolymers	511579	511649	11227	10203	0.9785	0.9804	0.9795	2
HG002	NovaSeq	20	FALSE	GT	FreeBayes	AllTandemRepeatsandHomopolymers	497796	474888	57018	23986	0.8928	0.954	0.9224	2
HG002	NovaSeq	20	FALSE	GT	Octopus	notinAllTandemRepeatsandHomopolymers	3331763	3333589	18794	37396	0.9944	0.9889	0.9916	2
HG002	NovaSeq	20	FALSE	GT	GATK4	notinAllTandemRepeatsandHomopolymers	3332889	3332995	49834	36270	0.9853	0.9892	0.9872	2
HG002	NovaSeq	20	FALSE	GT	FreeBayes	notinAllTandemRepeatsandHomopolymers	3335390	3276676	224365	33769	0.9359	0.99	0.9622	2
HG002	NovaSeq	30	FALSE	GT	Octopus	genome	3862414	3894832	21279	28110	0.9946	0.9928	0.9937	2
HG002	NovaSeq	30	FALSE	GT	GATK4	genome	3859131	3859057	50807	31393	0.987	0.9919	0.9895	2
HG002	NovaSeq	30	FALSE	GT	FreeBayes	genome	3848920	3765072	125182	41604	0.9678	0.9893	0.9784	2
HG002	NovaSeq	30	FALSE	GT	Octopus	alldifficult	970151	1001329	18803	26461	0.9816	0.9734	0.9775	2
HG002	NovaSeq	30	FALSE	GT	GATK4	alldifficult	967012	967106	39675	29600	0.9606	0.9703	0.9654	2
HG002	NovaSeq	30	FALSE	GT	FreeBayes	alldifficult	958733	921158	73965	37879	0.9257	0.962	0.9435	2
HG002	NovaSeq	30	FALSE	GT	Octopus	alllowmapandsegdup	253221	253705	15262	23488	0.9433	0.9151	0.929	2
HG002	NovaSeq	30	FALSE	GT	GATK4	alllowmapandsegdup	251378	251446	32466	25331	0.8856	0.9085	0.8969	2
HG002	NovaSeq	30	FALSE	GT	FreeBayes	alllowmapandsegdup	253753	244316	35783	22956	0.8722	0.917	0.8941	2
HG002	NovaSeq	30	FALSE	GT	Octopus	notinalldifficult	2892448	2894178	2482	1647	0.9991	0.9994	0.9993	2
HG002	NovaSeq	30	FALSE	GT	GATK4	notinalldifficult	2892304	2892490	11131	1791	0.9962	0.9994	0.9978	2
HG002	NovaSeq	30	FALSE	GT	FreeBayes	notinalldifficult	2890394	2845345	54624	3701	0.9812	0.9987	0.9899	2
HG002	NovaSeq	30	FALSE	GT	Octopus	notinalllowmapandsegdup	3608988	3641104	6022	4625	0.9983	0.9987	0.9985	2
HG002	NovaSeq	30	FALSE	GT	GATK4	notinalllowmapandsegdup	3607551	3607545	18349	6062	0.9949	0.9983	0.9966	2
HG002	NovaSeq	30	FALSE	GT	FreeBayes	notinalllowmapandsegdup	3594958	3520835	89546	18655	0.9752	0.9948	0.9849	2
HG002	NovaSeq	30	FALSE	GT	Octopus	AllTandemRepeatsandHomopolymers	519154	550152	3928	2628	0.9929	0.995	0.9939	2
HG002	NovaSeq	30	FALSE	GT	GATK4	AllTandemRepeatsandHomopolymers	517575	517641	7056	4207	0.9866	0.9919	0.9892	2
HG002	NovaSeq	30	FALSE	GT	FreeBayes	AllTandemRepeatsandHomopolymers	506904	483244	34306	14878	0.9337	0.9715	0.9522	2
HG002	NovaSeq	30	FALSE	GT	Octopus	notinAllTandemRepeatsandHomopolymers	3343674	3345501	17355	25485	0.9948	0.9924	0.9936	2
HG002	NovaSeq	30	FALSE	GT	GATK4	notinAllTandemRepeatsandHomopolymers	3341971	3342076	43755	27188	0.9871	0.9919	0.9895	2
HG002	NovaSeq	30	FALSE	GT	FreeBayes	notinAllTandemRepeatsandHomopolymers	3342450	3283380	94547	26709	0.972	0.9921	0.9819	2
HG002+HG003+HG004	NovaSeq	10	TRUE	AL	Octopus	genome	2372631	2380329	1536435	2573943	0.6077	0.4797	0.5361	6
HG002+HG003+HG004	NovaSeq	10	TRUE	AL	GATK4	genome	2279619	2279443	1721607	2669439	0.5697	0.4606	0.5094	6
HG002+HG003+HG004	NovaSeq	10	TRUE	AL	FreeBayes	genome	2046987	2013592	1583021	2904068	0.5599	0.4134	0.4756	6
HG002+HG003+HG004	NovaSeq	10	TRUE	AL	Octopus	alldifficult	493945	501371	374880	637673	0.5722	0.4365	0.4952	6
HG002+HG003+HG004	NovaSeq	10	TRUE	AL	GATK4	alldifficult	452394	452310	387649	680368	0.5385	0.3994	0.4586	6
HG002+HG003+HG004	NovaSeq	10	TRUE	AL	FreeBayes	alldifficult	404400	393852	341774	729888	0.5354	0.3565	0.428	6
HG002+HG003+HG004	NovaSeq	10	TRUE	AL	Octopus	alllowmapandsegdup	137108	137204	93976	198925	0.5935	0.408	0.4836	6
HG002+HG003+HG004	NovaSeq	10	TRUE	AL	GATK4	alllowmapandsegdup	121105	121143	106277	214962	0.5327	0.3604	0.4299	6
HG002+HG003+HG004	NovaSeq	10	TRUE	AL	FreeBayes	alllowmapandsegdup	117479	114088	99204	218690	0.5349	0.3495	0.4227	6
HG002+HG003+HG004	NovaSeq	10	TRUE	AL	Octopus	notinalldifficult	1878773	1879239	1161645	1936574	0.618	0.4924	0.5481	6
HG002+HG003+HG004	NovaSeq	10	TRUE	AL	GATK4	notinalldifficult	1827330	1827418	1334146	1989357	0.578	0.4788	0.5237	6
HG002+HG003+HG004	NovaSeq	10	TRUE	AL	FreeBayes	notinalldifficult	1642569	1620142	1266910	2174590	0.5612	0.4303	0.4871	6
HG002+HG003+HG004	NovaSeq	10	TRUE	AL	Octopus	notinalllowmapandsegdup	2235375	2243063	1442426	2374955	0.6086	0.4849	0.5397	6
HG002+HG003+HG004	NovaSeq	10	TRUE	AL	GATK4	notinalllowmapandsegdup	2158384	2158243	1615284	2454396	0.5719	0.4679	0.5147	6
HG002+HG003+HG004	NovaSeq	10	TRUE	AL	FreeBayes	notinalllowmapandsegdup	1929391	1899502	1484326	2685284	0.5613	0.4181	0.4792	6
HG002+HG003+HG004	NovaSeq	10	TRUE	AL	Octopus	AllTandemRepeatsandHomopolymers	224602	231979	200745	303818	0.5361	0.425	0.4742	6
HG002+HG003+HG004	NovaSeq	10	TRUE	AL	GATK4	AllTandemRepeatsandHomopolymers	203022	202908	187932	326457	0.5192	0.3834	0.4411	6
HG002+HG003+HG004	NovaSeq	10	TRUE	AL	FreeBayes	AllTandemRepeatsandHomopolymers	171518	166444	156393	359310	0.5156	0.3231	0.3973	6
HG002+HG003+HG004	NovaSeq	10	TRUE	AL	Octopus	notinAllTandemRepeatsandHomopolymers	2148241	2148687	1335824	2270515	0.6166	0.4862	0.5437	6
HG002+HG003+HG004	NovaSeq	10	TRUE	AL	GATK4	notinAllTandemRepeatsandHomopolymers	2076804	2076857	1533925	2343378	0.5752	0.4698	0.5172	6
HG002+HG003+HG004	NovaSeq	10	TRUE	AL	FreeBayes	notinAllTandemRepeatsandHomopolymers	1875550	1847565	1454519	2545280	0.5595	0.4243	0.4826	6
HG002+HG003+HG004	NovaSeq	20	TRUE	AL	Octopus	genome	3376997	3393623	1173478	1568211	0.7431	0.6829	0.7117	6
HG002+HG003+HG004	NovaSeq	20	TRUE	AL	GATK4	genome	3117746	3117382	1432668	1830176	0.6851	0.6301	0.6565	6
HG002+HG003+HG004	NovaSeq	20	TRUE	AL	FreeBayes	genome	2990627	2938102	1487054	1960046	0.664	0.6041	0.6326	6
HG002+HG003+HG004	NovaSeq	20	TRUE	AL	Octopus	alldifficult	717244	732950	308434	412224	0.7038	0.635	0.6677	6
HG002+HG003+HG004	NovaSeq	20	TRUE	AL	GATK4	alldifficult	637343	637105	348198	494408	0.6466	0.5631	0.602	6
HG002+HG003+HG004	NovaSeq	20	TRUE	AL	FreeBayes	alldifficult	604351	586770	344606	529576	0.63	0.533	0.5774	6
HG002+HG003+HG004	NovaSeq	20	TRUE	AL	Octopus	alllowmapandsegdup	198759	198921	83629	137254	0.704	0.5915	0.6429	6
HG002+HG003+HG004	NovaSeq	20	TRUE	AL	GATK4	alllowmapandsegdup	167200	167240	99831	168846	0.6262	0.4976	0.5545	6
HG002+HG003+HG004	NovaSeq	20	TRUE	AL	FreeBayes	alllowmapandsegdup	174673	169375	103115	161518	0.6216	0.5196	0.566	6
HG002+HG003+HG004	NovaSeq	20	TRUE	AL	Octopus	notinalldifficult	2659988	2661223	865174	1156143	0.7547	0.697	0.7247	6
HG002+HG003+HG004	NovaSeq	20	TRUE	AL	GATK4	notinalldifficult	2480616	2480730	1084617	1335946	0.6958	0.65	0.6721	6
HG002+HG003+HG004	NovaSeq	20	TRUE	AL	FreeBayes	notinalldifficult	2386416	2352112	1169289	1430723	0.6679	0.6252	0.6459	6
HG002+HG003+HG004	NovaSeq	20	TRUE	AL	Octopus	notinalllowmapandsegdup	3178076	3194657	1089836	1430909	0.7456	0.6895	0.7165	6
HG002+HG003+HG004	NovaSeq	20	TRUE	AL	GATK4	notinalllowmapandsegdup	2950401	2950087	1332783	1661264	0.6888	0.6398	0.6634	6
HG002+HG003+HG004	NovaSeq	20	TRUE	AL	FreeBayes	notinalllowmapandsegdup	2815812	2768748	1384504	1798459	0.6666	0.6102	0.6372	6
HG002+HG003+HG004	NovaSeq	20	TRUE	AL	Octopus	AllTandemRepeatsandHomopolymers	331081	346642	165401	195234	0.677	0.6291	0.6521	6
HG002+HG003+HG004	NovaSeq	20	TRUE	AL	GATK4	AllTandemRepeatsandHomopolymers	296023	295764	172034	232504	0.6322	0.5601	0.594	6
HG002+HG003+HG004	NovaSeq	20	TRUE	AL	FreeBayes	AllTandemRepeatsandHomopolymers	262659	253525	162506	267815	0.6094	0.4951	0.5464	6
HG002+HG003+HG004	NovaSeq	20	TRUE	AL	Octopus	notinAllTandemRepeatsandHomopolymers	3046295	3047581	1008233	1373199	0.7514	0.6893	0.719	6
HG002+HG003+HG004	NovaSeq	20	TRUE	AL	GATK4	notinAllTandemRepeatsandHomopolymers	2822067	2822126	1260834	1597929	0.6912	0.6385	0.6638	6
HG002+HG003+HG004	NovaSeq	20	TRUE	AL	FreeBayes	notinAllTandemRepeatsandHomopolymers	2728237	2685379	1353640	1692565	0.6649	0.6171	0.6401	6
HG002+HG003+HG004	NovaSeq	30	TRUE	AL	Octopus	genome	3934882	3956682	873821	1009014	0.8191	0.7959	0.8073	6
HG002+HG003+HG004	NovaSeq	30	TRUE	AL	GATK4	genome	3550580	3550097	1146315	1396784	0.7559	0.7177	0.7363	6
HG002+HG003+HG004	NovaSeq	30	TRUE	AL	FreeBayes	genome	3493383	3429414	1161805	1457086	0.747	0.7057	0.7257	6
HG002+HG003+HG004	NovaSeq	30	TRUE	AL	Octopus	alldifficult	841041	861935	245624	287350	0.7782	0.7453	0.7614	6
HG002+HG003+HG004	NovaSeq	30	TRUE	AL	GATK4	alldifficult	736615	736273	290047	394679	0.7174	0.6511	0.6827	6
HG002+HG003+HG004	NovaSeq	30	TRUE	AL	FreeBayes	alldifficult	715353	693363	290363	418379	0.7048	0.631	0.6659	6
HG002+HG003+HG004	NovaSeq	30	TRUE	AL	Octopus	alllowmapandsegdup	233487	233690	74184	102477	0.759	0.695	0.7256	6
HG002+HG003+HG004	NovaSeq	30	TRUE	AL	GATK4	alllowmapandsegdup	190392	190428	86279	145619	0.6882	0.5666	0.6215	6
HG002+HG003+HG004	NovaSeq	30	TRUE	AL	FreeBayes	alllowmapandsegdup	205278	198865	91623	130912	0.6846	0.6106	0.6455	6
HG002+HG003+HG004	NovaSeq	30	TRUE	AL	Octopus	notinalldifficult	3094133	3095431	628339	721764	0.8313	0.8109	0.8209	6
HG002+HG003+HG004	NovaSeq	30	TRUE	AL	GATK4	notinalldifficult	2814190	2814316	856397	1002271	0.7667	0.7374	0.7518	6
HG002+HG003+HG004	NovaSeq	30	TRUE	AL	FreeBayes	notinalldifficult	2778232	2737055	893590	1038898	0.7539	0.7278	0.7406	6
HG002+HG003+HG004	NovaSeq	30	TRUE	AL	Octopus	notinalllowmapandsegdup	3701222	3722950	799650	906498	0.8232	0.8033	0.8131	6
HG002+HG003+HG004	NovaSeq	30	TRUE	AL	GATK4	notinalllowmapandsegdup	3360019	3359586	1059998	1251122	0.7602	0.7287	0.7441	6
HG002+HG003+HG004	NovaSeq	30	TRUE	AL	FreeBayes	notinalllowmapandsegdup	3287956	3230596	1070687	1326112	0.7511	0.7126	0.7313	6
HG002+HG003+HG004	NovaSeq	30	TRUE	AL	Octopus	AllTandemRepeatsandHomopolymers	390633	411376	128146	134634	0.7625	0.7437	0.753	6
HG002+HG003+HG004	NovaSeq	30	TRUE	AL	GATK4	AllTandemRepeatsandHomopolymers	348960	348593	143029	179144	0.7091	0.6608	0.6841	6
HG002+HG003+HG004	NovaSeq	30	TRUE	AL	FreeBayes	AllTandemRepeatsandHomopolymers	315946	304119	137203	214342	0.6891	0.5958	0.6391	6
HG002+HG003+HG004	NovaSeq	30	TRUE	AL	Octopus	notinAllTandemRepeatsandHomopolymers	3544695	3546048	745837	874536	0.8262	0.8021	0.814	6
HG002+HG003+HG004	NovaSeq	30	TRUE	AL	GATK4	notinAllTandemRepeatsandHomopolymers	3202002	3202077	1003447	1217859	0.7614	0.7245	0.7425	6
HG002+HG003+HG004	NovaSeq	30	TRUE	AL	FreeBayes	notinAllTandemRepeatsandHomopolymers	3177783	3126321	1048628	1243003	0.7488	0.7188	0.7335	6
HG002+HG003+HG004	NovaSeq	40	TRUE	AL	Octopus	genome	4237092	4262196	659018	706145	0.8661	0.8571	0.8616	6
HG002+HG003+HG004	NovaSeq	40	TRUE	AL	GATK4	genome	3830804	3830223	929911	1116323	0.8046	0.7743	0.7892	6
HG002+HG003+HG004	NovaSeq	40	TRUE	AL	FreeBayes	genome	3823222	3751595	947201	1127095	0.7984	0.7723	0.7852	6
HG002+HG003+HG004	NovaSeq	40	TRUE	AL	Octopus	alldifficult	910676	934908	199692	217153	0.824	0.8075	0.8156	6
HG002+HG003+HG004	NovaSeq	40	TRUE	AL	GATK4	alldifficult	798459	798047	244161	332632	0.7657	0.7059	0.7346	6
HG002+HG003+HG004	NovaSeq	40	TRUE	AL	FreeBayes	alldifficult	791598	766531	250781	341988	0.7535	0.6983	0.7249	6
HG002+HG003+HG004	NovaSeq	40	TRUE	AL	Octopus	alllowmapandsegdup	252581	252814	67395	83353	0.7895	0.7519	0.7702	6
HG002+HG003+HG004	NovaSeq	40	TRUE	AL	GATK4	alllowmapandsegdup	204528	204579	75762	131464	0.7298	0.6087	0.6638	6
HG002+HG003+HG004	NovaSeq	40	TRUE	AL	FreeBayes	alllowmapandsegdup	225030	217996	83435	111155	0.7232	0.6694	0.6952	6
HG002+HG003+HG004	NovaSeq	40	TRUE	AL	Octopus	notinalldifficult	3326718	3328038	459484	489082	0.8787	0.8718	0.8752	6
HG002+HG003+HG004	NovaSeq	40	TRUE	AL	GATK4	notinalldifficult	3032610	3032751	685859	783817	0.8156	0.7946	0.805	6
HG002+HG003+HG004	NovaSeq	40	TRUE	AL	FreeBayes	notinalldifficult	3031867	2986198	714610	785258	0.8069	0.7943	0.8005	6
HG002+HG003+HG004	NovaSeq	40	TRUE	AL	Octopus	notinalllowmapandsegdup	3984315	4009335	591668	622776	0.8714	0.8648	0.8681	6
HG002+HG003+HG004	NovaSeq	40	TRUE	AL	GATK4	notinalllowmapandsegdup	3626105	3625580	854113	984818	0.8093	0.7864	0.7977	6
HG002+HG003+HG004	NovaSeq	40	TRUE	AL	FreeBayes	notinalllowmapandsegdup	3598040	3533669	864216	1015881	0.8035	0.7798	0.7915	6
HG002+HG003+HG004	NovaSeq	40	TRUE	AL	Octopus	AllTandemRepeatsandHomopolymers	425458	449548	100285	99269	0.8176	0.8108	0.8142	6
HG002+HG003+HG004	NovaSeq	40	TRUE	AL	GATK4	AllTandemRepeatsandHomopolymers	382108	381661	118710	145823	0.7628	0.7238	0.7428	6
HG002+HG003+HG004	NovaSeq	40	TRUE	AL	FreeBayes	AllTandemRepeatsandHomopolymers	355145	341178	117761	175002	0.7434	0.6699	0.7047	6
HG002+HG003+HG004	NovaSeq	40	TRUE	AL	Octopus	notinAllTandemRepeatsandHomopolymers	3812108	3813462	558888	607004	0.8722	0.8626	0.8674	6
HG002+HG003+HG004	NovaSeq	40	TRUE	AL	GATK4	notinAllTandemRepeatsandHomopolymers	3449117	3449196	811350	970680	0.8096	0.7804	0.7947	6
HG002+HG003+HG004	NovaSeq	40	TRUE	AL	FreeBayes	notinAllTandemRepeatsandHomopolymers	3468472	3411553	849186	952304	0.8007	0.7846	0.7926	6
HG002+HG003+HG004	NovaSeq	50	TRUE	AL	Octopus	genome	4414100	4441365	512817	528653	0.8965	0.893	0.8948	6
HG002+HG003+HG004	NovaSeq	50	TRUE	AL	GATK4	genome	4033770	4033144	763640	913211	0.8408	0.8154	0.8279	6
HG002+HG003+HG004	NovaSeq	50	TRUE	AL	FreeBayes	genome	4036654	3959877	800089	913487	0.8319	0.8155	0.8236	6
HG002+HG003+HG004	NovaSeq	50	TRUE	AL	Octopus	alldifficult	952602	979087	167783	174850	0.8537	0.8449	0.8493	6
HG002+HG003+HG004	NovaSeq	50	TRUE	AL	GATK4	alldifficult	843165	842714	208212	287770	0.8019	0.7455	0.7727	6
HG002+HG003+HG004	NovaSeq	50	TRUE	AL	FreeBayes	alldifficult	843306	815972	223411	290140	0.7851	0.744	0.764	6
HG002+HG003+HG004	NovaSeq	50	TRUE	AL	Octopus	alllowmapandsegdup	263441	263702	62889	72504	0.8074	0.7842	0.7956	6
HG002+HG003+HG004	NovaSeq	50	TRUE	AL	GATK4	alllowmapandsegdup	214879	214922	67977	121124	0.7597	0.6395	0.6945	6
HG002+HG003+HG004	NovaSeq	50	TRUE	AL	FreeBayes	alllowmapandsegdup	237744	230259	77848	98428	0.7473	0.7072	0.7267	6
HG002+HG003+HG004	NovaSeq	50	TRUE	AL	Octopus	notinalldifficult	3461831	3463068	345172	353862	0.9094	0.9073	0.9083	6
HG002+HG003+HG004	NovaSeq	50	TRUE	AL	GATK4	notinalldifficult	3190911	3191063	555491	625526	0.8517	0.8361	0.8438	6
HG002+HG003+HG004	NovaSeq	50	TRUE	AL	FreeBayes	notinalldifficult	3193634	3145121	592137	623454	0.8416	0.8367	0.8391	6
HG002+HG003+HG004	NovaSeq	50	TRUE	AL	Octopus	notinalllowmapandsegdup	4150465	4177625	449975	456131	0.9028	0.901	0.9019	6
HG002+HG003+HG004	NovaSeq	50	TRUE	AL	GATK4	notinalllowmapandsegdup	3818718	3818152	695624	792049	0.8459	0.8282	0.837	6
HG002+HG003+HG004	NovaSeq	50	TRUE	AL	FreeBayes	notinalllowmapandsegdup	3798754	3729704	722648	815004	0.8377	0.8234	0.8305	6
HG002+HG003+HG004	NovaSeq	50	TRUE	AL	Octopus	AllTandemRepeatsandHomopolymers	447316	473650	80625	77065	0.8545	0.853	0.8538	6
HG002+HG003+HG004	NovaSeq	50	TRUE	AL	GATK4	AllTandemRepeatsandHomopolymers	405654	405165	99453	122121	0.8029	0.7686	0.7854	6
HG002+HG003+HG004	NovaSeq	50	TRUE	AL	FreeBayes	AllTandemRepeatsandHomopolymers	383099	367567	103963	146931	0.7795	0.7228	0.7501	6
HG002+HG003+HG004	NovaSeq	50	TRUE	AL	Octopus	notinAllTandemRepeatsandHomopolymers	3967298	3968573	432326	451676	0.9018	0.8978	0.8998	6
HG002+HG003+HG004	NovaSeq	50	TRUE	AL	GATK4	notinAllTandemRepeatsandHomopolymers	3628598	3628687	664279	791209	0.8453	0.821	0.8329	6
HG002+HG003+HG004	NovaSeq	50	TRUE	AL	FreeBayes	notinAllTandemRepeatsandHomopolymers	3654004	3593530	712885	766711	0.8345	0.8266	0.8305	6
HG002+HG003+HG004	NovaSeq	60	TRUE	AL	Octopus	genome	4527476	4556118	411514	414712	0.9172	0.9161	0.9166	6
HG002+HG003+HG004	NovaSeq	60	TRUE	AL	GATK4	genome	4183677	4183008	637739	763219	0.8677	0.8457	0.8566	6
HG002+HG003+HG004	NovaSeq	60	TRUE	AL	FreeBayes	genome	4186242	4105955	685351	763816	0.857	0.8457	0.8513	6
HG002+HG003+HG004	NovaSeq	60	TRUE	AL	Octopus	alldifficult	979957	1007900	145252	147201	0.874	0.8694	0.8717	6
HG002+HG003+HG004	NovaSeq	60	TRUE	AL	GATK4	alldifficult	876534	876045	180230	254334	0.8294	0.7751	0.8013	6
HG002+HG003+HG004	NovaSeq	60	TRUE	AL	FreeBayes	alldifficult	879565	850713	201659	253794	0.8084	0.7761	0.7919	6
HG002+HG003+HG004	NovaSeq	60	TRUE	AL	Octopus	alllowmapandsegdup	270274	270541	60177	65625	0.818	0.8046	0.8113	6
HG002+HG003+HG004	NovaSeq	60	TRUE	AL	GATK4	alllowmapandsegdup	222717	222762	61594	113271	0.7834	0.6629	0.7181	6
HG002+HG003+HG004	NovaSeq	60	TRUE	AL	FreeBayes	alllowmapandsegdup	246259	238478	73311	89903	0.7649	0.7326	0.7484	6
HG002+HG003+HG004	NovaSeq	60	TRUE	AL	Octopus	notinalldifficult	3547868	3549026	266365	267553	0.9302	0.9299	0.93	6
HG002+HG003+HG004	NovaSeq	60	TRUE	AL	GATK4	notinalldifficult	3307445	3307601	457584	508974	0.8785	0.8666	0.8725	6
HG002+HG003+HG004	NovaSeq	60	TRUE	AL	FreeBayes	notinalldifficult	3306995	3256532	497044	510098	0.8676	0.8664	0.867	6
HG002+HG003+HG004	NovaSeq	60	TRUE	AL	Octopus	notinalllowmapandsegdup	4257008	4285543	351389	349069	0.9242	0.9242	0.9242	6
HG002+HG003+HG004	NovaSeq	60	TRUE	AL	GATK4	notinalllowmapandsegdup	3960787	3960182	576111	649910	0.873	0.859	0.866	6
HG002+HG003+HG004	NovaSeq	60	TRUE	AL	FreeBayes	notinalllowmapandsegdup	3939824	3867568	612407	673861	0.8633	0.8539	0.8586	6
HG002+HG003+HG004	NovaSeq	60	TRUE	AL	Octopus	AllTandemRepeatsandHomopolymers	462033	489847	66225	62107	0.8809	0.8815	0.8812	6
HG002+HG003+HG004	NovaSeq	60	TRUE	AL	GATK4	AllTandemRepeatsandHomopolymers	423168	422643	84753	104574	0.833	0.8018	0.8171	6
HG002+HG003+HG004	NovaSeq	60	TRUE	AL	FreeBayes	AllTandemRepeatsandHomopolymers	402855	386278	93092	127102	0.8058	0.7602	0.7823	6
HG002+HG003+HG004	NovaSeq	60	TRUE	AL	Octopus	notinAllTandemRepeatsandHomopolymers	4065984	4067158	345377	352665	0.9217	0.9202	0.921	6
HG002+HG003+HG004	NovaSeq	60	TRUE	AL	GATK4	notinAllTandemRepeatsandHomopolymers	3760985	3761072	553087	658770	0.8718	0.8509	0.8612	6
HG002+HG003+HG004	NovaSeq	60	TRUE	AL	FreeBayes	notinAllTandemRepeatsandHomopolymers	3783854	3720951	606742	636852	0.8598	0.8559	0.8579	6
HG002+HG003+HG004	NovaSeq	70	TRUE	AL	Octopus	genome	4607000	4636701	338060	335263	0.932	0.9322	0.9321	6
HG002+HG003+HG004	NovaSeq	70	TRUE	AL	GATK4	genome	4298088	4297401	539610	648717	0.8884	0.8689	0.8785	6
HG002+HG003+HG004	NovaSeq	70	TRUE	AL	FreeBayes	genome	4297253	4214286	595803	652755	0.8761	0.8681	0.8721	6
HG002+HG003+HG004	NovaSeq	70	TRUE	AL	Octopus	alldifficult	999759	1028816	128639	127339	0.8889	0.887	0.8879	6
HG002+HG003+HG004	NovaSeq	70	TRUE	AL	GATK4	alldifficult	902445	901958	158170	228347	0.8508	0.7981	0.8236	6
HG002+HG003+HG004	NovaSeq	70	TRUE	AL	FreeBayes	alldifficult	906967	876839	184109	226336	0.8265	0.8003	0.8132	6
HG002+HG003+HG004	NovaSeq	70	TRUE	AL	Octopus	alllowmapandsegdup	275247	275514	58142	60655	0.8257	0.8194	0.8226	6
HG002+HG003+HG004	NovaSeq	70	TRUE	AL	GATK4	alllowmapandsegdup	228744	228795	56674	107240	0.8015	0.6808	0.7362	6
HG002+HG003+HG004	NovaSeq	70	TRUE	AL	FreeBayes	alllowmapandsegdup	252753	244739	70039	83411	0.7775	0.7519	0.7645	6
HG002+HG003+HG004	NovaSeq	70	TRUE	AL	Octopus	notinalldifficult	3607593	3608713	209553	207964	0.9451	0.9455	0.9453	6
HG002+HG003+HG004	NovaSeq	70	TRUE	AL	GATK4	notinalldifficult	3395982	3396149	381488	420422	0.899	0.8898	0.8944	6
HG002+HG003+HG004	NovaSeq	70	TRUE	AL	FreeBayes	notinalldifficult	3390612	3338776	423244	426485	0.8875	0.8883	0.8879	6
HG002+HG003+HG004	NovaSeq	70	TRUE	AL	Octopus	notinalllowmapandsegdup	4331556	4361144	279987	274593	0.9397	0.9404	0.94	6
HG002+HG003+HG004	NovaSeq	70	TRUE	AL	GATK4	notinalllowmapandsegdup	4069165	4068544	482909	541445	0.8939	0.8826	0.8882	6
HG002+HG003+HG004	NovaSeq	70	TRUE	AL	FreeBayes	notinalllowmapandsegdup	4044336	3969638	526095	569297	0.883	0.8766	0.8798	6
HG002+HG003+HG004	NovaSeq	70	TRUE	AL	Octopus	AllTandemRepeatsandHomopolymers	472799	501721	55522	51254	0.9004	0.9022	0.9013	6
HG002+HG003+HG004	NovaSeq	70	TRUE	AL	GATK4	AllTandemRepeatsandHomopolymers	437191	436661	72561	90475	0.8575	0.8285	0.8428	6
HG002+HG003+HG004	NovaSeq	70	TRUE	AL	FreeBayes	AllTandemRepeatsandHomopolymers	418220	400772	83419	111679	0.8277	0.7892	0.808	6
HG002+HG003+HG004	NovaSeq	70	TRUE	AL	Octopus	notinAllTandemRepeatsandHomopolymers	4134748	4135880	282642	284064	0.936	0.9357	0.9359	6
HG002+HG003+HG004	NovaSeq	70	TRUE	AL	GATK4	notinAllTandemRepeatsandHomopolymers	3861407	3861500	467128	558333	0.8921	0.8737	0.8828	6
HG002+HG003+HG004	NovaSeq	70	TRUE	AL	FreeBayes	notinAllTandemRepeatsandHomopolymers	3879519	3814834	524863	541193	0.8791	0.8776	0.8783	6
HG002+HG003+HG004	NovaSeq	80	TRUE	AL	Octopus	genome	4664407	4694877	283496	277734	0.9431	0.9438	0.9434	6
HG002+HG003+HG004	NovaSeq	80	TRUE	AL	GATK4	genome	4387302	4386563	462422	559533	0.9046	0.8869	0.8957	6
HG002+HG003+HG004	NovaSeq	80	TRUE	AL	FreeBayes	genome	4381279	4296233	525411	568640	0.891	0.8851	0.8881	6
HG002+HG003+HG004	NovaSeq	80	TRUE	AL	Octopus	alldifficult	1014631	1044541	115507	112383	0.9004	0.9003	0.9004	6
HG002+HG003+HG004	NovaSeq	80	TRUE	AL	GATK4	alldifficult	922858	922318	140764	207960	0.8676	0.8161	0.8411	6
HG002+HG003+HG004	NovaSeq	80	TRUE	AL	FreeBayes	alldifficult	927712	896681	170275	205502	0.8404	0.8187	0.8294	6
HG002+HG003+HG004	NovaSeq	80	TRUE	AL	Octopus	alllowmapandsegdup	279003	279269	56477	56888	0.8318	0.8306	0.8312	6
HG002+HG003+HG004	NovaSeq	80	TRUE	AL	GATK4	alllowmapandsegdup	233287	233335	52977	102703	0.815	0.6943	0.7498	6
HG002+HG003+HG004	NovaSeq	80	TRUE	AL	FreeBayes	alllowmapandsegdup	257487	249309	67401	78672	0.7872	0.766	0.7764	6
HG002+HG003+HG004	NovaSeq	80	TRUE	AL	Octopus	notinalldifficult	3650145	3651188	168101	165373	0.956	0.9567	0.9563	6
HG002+HG003+HG004	NovaSeq	80	TRUE	AL	GATK4	notinalldifficult	3464787	3464953	321699	351621	0.915	0.9079	0.9114	6
HG002+HG003+HG004	NovaSeq	80	TRUE	AL	FreeBayes	notinalldifficult	3453912	3400889	365282	363185	0.903	0.9049	0.9039	6
HG002+HG003+HG004	NovaSeq	80	TRUE	AL	Octopus	notinalllowmapandsegdup	4385207	4415572	227081	220831	0.9511	0.9521	0.9516	6
HG002+HG003+HG004	NovaSeq	80	TRUE	AL	GATK4	notinalllowmapandsegdup	4153841	4153173	409410	456793	0.9103	0.9009	0.9056	6
HG002+HG003+HG004	NovaSeq	80	TRUE	AL	FreeBayes	notinalllowmapandsegdup	4123623	4047020	458324	489926	0.8983	0.8938	0.896	6
HG002+HG003+HG004	NovaSeq	80	TRUE	AL	Octopus	AllTandemRepeatsandHomopolymers	480957	510733	46968	43042	0.9158	0.9179	0.9168	6
HG002+HG003+HG004	NovaSeq	80	TRUE	AL	GATK4	AllTandemRepeatsandHomopolymers	448219	447634	63044	79448	0.8765	0.8494	0.8628	6
HG002+HG003+HG004	NovaSeq	80	TRUE	AL	FreeBayes	AllTandemRepeatsandHomopolymers	429980	411860	75980	99835	0.8443	0.8116	0.8276	6
HG002+HG003+HG004	NovaSeq	80	TRUE	AL	Octopus	notinAllTandemRepeatsandHomopolymers	4184013	4185065	236618	234730	0.9465	0.9469	0.9467	6
HG002+HG003+HG004	NovaSeq	80	TRUE	AL	GATK4	notinAllTandemRepeatsandHomopolymers	3939597	3939687	399451	480172	0.9079	0.8914	0.8996	6
HG002+HG003+HG004	NovaSeq	80	TRUE	AL	FreeBayes	notinAllTandemRepeatsandHomopolymers	3951807	3885699	460390	468900	0.8941	0.8939	0.894	6
HG002+HG003+HG004	NovaSeq	90	TRUE	AL	Octopus	genome	4706736	4737705	242835	235231	0.9512	0.9524	0.9518	6
HG002+HG003+HG004	NovaSeq	90	TRUE	AL	GATK4	genome	4459711	4458983	398527	487010	0.918	0.9015	0.9097	6
HG002+HG003+HG004	NovaSeq	90	TRUE	AL	FreeBayes	genome	4447682	4360984	467850	502201	0.9031	0.8985	0.9008	6
HG002+HG003+HG004	NovaSeq	90	TRUE	AL	Octopus	alldifficult	1025092	1055544	106289	101856	0.9085	0.9096	0.9091	6
HG002+HG003+HG004	NovaSeq	90	TRUE	AL	GATK4	alldifficult	939068	938541	126523	191710	0.8812	0.8305	0.8551	6
HG002+HG003+HG004	NovaSeq	90	TRUE	AL	FreeBayes	alldifficult	944453	912730	158355	188731	0.8522	0.8335	0.8427	6
HG002+HG003+HG004	NovaSeq	90	TRUE	AL	Octopus	alllowmapandsegdup	281556	281823	55356	54303	0.8358	0.8383	0.8371	6
HG002+HG003+HG004	NovaSeq	90	TRUE	AL	GATK4	alllowmapandsegdup	237065	237116	49724	98923	0.8266	0.7056	0.7613	6
HG002+HG003+HG004	NovaSeq	90	TRUE	AL	FreeBayes	alllowmapandsegdup	261606	253275	65039	74553	0.7957	0.7782	0.7869	6
HG002+HG003+HG004	NovaSeq	90	TRUE	AL	Octopus	notinalldifficult	3682023	3683037	136655	133387	0.9642	0.965	0.9646	6
HG002+HG003+HG004	NovaSeq	90	TRUE	AL	GATK4	notinalldifficult	3520988	3521156	272041	295346	0.9283	0.9226	0.9254	6
HG002+HG003+HG004	NovaSeq	90	TRUE	AL	FreeBayes	notinalldifficult	3503588	3449631	318467	313503	0.9155	0.9179	0.9167	6
HG002+HG003+HG004	NovaSeq	90	TRUE	AL	Octopus	notinalllowmapandsegdup	4424982	4455851	187548	180913	0.9596	0.9607	0.9602	6
HG002+HG003+HG004	NovaSeq	90	TRUE	AL	GATK4	notinalllowmapandsegdup	4222459	4221803	348776	388063	0.9237	0.9158	0.9197	6
HG002+HG003+HG004	NovaSeq	90	TRUE	AL	FreeBayes	notinalllowmapandsegdup	4185905	4107805	403116	427608	0.9106	0.9073	0.909	6
HG002+HG003+HG004	NovaSeq	90	TRUE	AL	Octopus	AllTandemRepeatsandHomopolymers	486557	516891	41088	37405	0.9264	0.9286	0.9275	6
HG002+HG003+HG004	NovaSeq	90	TRUE	AL	GATK4	AllTandemRepeatsandHomopolymers	456955	456379	55350	70696	0.8918	0.866	0.8787	6
HG002+HG003+HG004	NovaSeq	90	TRUE	AL	FreeBayes	AllTandemRepeatsandHomopolymers	439064	420485	69614	90713	0.858	0.8288	0.8431	6
HG002+HG003+HG004	NovaSeq	90	TRUE	AL	Octopus	notinAllTandemRepeatsandHomopolymers	4220751	4221756	201833	197855	0.9544	0.9552	0.9548	6
HG002+HG003+HG004	NovaSeq	90	TRUE	AL	GATK4	notinAllTandemRepeatsandHomopolymers	4003275	4003369	343247	416396	0.921	0.9058	0.9133	6
HG002+HG003+HG004	NovaSeq	90	TRUE	AL	FreeBayes	notinAllTandemRepeatsandHomopolymers	4009140	3941863	407947	411567	0.9062	0.9069	0.9066	6
HG002+HG003+HG004	NovaSeq	100	TRUE	AL	Octopus	genome	4739270	4770643	211660	202685	0.9575	0.959	0.9583	6
HG002+HG003+HG004	NovaSeq	100	TRUE	AL	GATK4	genome	4518073	4517317	346665	428661	0.9287	0.9133	0.921	6
HG002+HG003+HG004	NovaSeq	100	TRUE	AL	FreeBayes	genome	4501047	4412984	421003	448836	0.9129	0.9093	0.9111	6
HG002+HG003+HG004	NovaSeq	100	TRUE	AL	Octopus	alldifficult	1033256	1064161	99307	93635	0.9146	0.9169	0.9158	6
HG002+HG003+HG004	NovaSeq	100	TRUE	AL	GATK4	alldifficult	952428	951879	114767	178365	0.8924	0.8423	0.8666	6
HG002+HG003+HG004	NovaSeq	100	TRUE	AL	FreeBayes	alldifficult	957577	925265	148851	175600	0.8614	0.845	0.8532	6
HG002+HG003+HG004	NovaSeq	100	TRUE	AL	Octopus	alllowmapandsegdup	283543	283816	54867	52347	0.838	0.8442	0.8411	6
HG002+HG003+HG004	NovaSeq	100	TRUE	AL	GATK4	alllowmapandsegdup	239992	240046	47185	95994	0.8357	0.7143	0.7703	6
HG002+HG003+HG004	NovaSeq	100	TRUE	AL	FreeBayes	alllowmapandsegdup	264626	256168	63275	71535	0.8019	0.7872	0.7945	6
HG002+HG003+HG004	NovaSeq	100	TRUE	AL	Octopus	notinalldifficult	3706380	3707338	112481	109075	0.9706	0.9714	0.971	6
HG002+HG003+HG004	NovaSeq	100	TRUE	AL	GATK4	notinalldifficult	3565996	3566161	231926	250336	0.9389	0.9344	0.9367	6
HG002+HG003+HG004	NovaSeq	100	TRUE	AL	FreeBayes	notinalldifficult	3543828	3489091	280315	273270	0.9256	0.9284	0.927	6
HG002+HG003+HG004	NovaSeq	100	TRUE	AL	Octopus	notinalllowmapandsegdup	4455527	4486789	156866	150326	0.9662	0.9674	0.9668	6
HG002+HG003+HG004	NovaSeq	100	TRUE	AL	GATK4	notinalllowmapandsegdup	4277897	4277214	299450	332640	0.9346	0.9279	0.9312	6
HG002+HG003+HG004	NovaSeq	100	TRUE	AL	FreeBayes	notinalllowmapandsegdup	4236250	4156916	358002	377261	0.9207	0.9182	0.9195	6
HG002+HG003+HG004	NovaSeq	100	TRUE	AL	Octopus	AllTandemRepeatsandHomopolymers	491222	522016	36042	32707	0.9354	0.9376	0.9365	6
HG002+HG003+HG004	NovaSeq	100	TRUE	AL	GATK4	AllTandemRepeatsandHomopolymers	464330	463730	48828	63318	0.9047	0.88	0.8922	6
HG002+HG003+HG004	NovaSeq	100	TRUE	AL	FreeBayes	AllTandemRepeatsandHomopolymers	446386	427426	64400	83387	0.8691	0.8426	0.8556	6
HG002+HG003+HG004	NovaSeq	100	TRUE	AL	Octopus	notinAllTandemRepeatsandHomopolymers	4248608	4249554	175722	170019	0.9603	0.9615	0.9609	6
HG002+HG003+HG004	NovaSeq	100	TRUE	AL	GATK4	notinAllTandemRepeatsandHomopolymers	4054274	4054365	297894	365413	0.9316	0.9173	0.9244	6
HG002+HG003+HG004	NovaSeq	100	TRUE	AL	FreeBayes	notinAllTandemRepeatsandHomopolymers	4055190	3986918	365450	365521	0.916	0.9173	0.9167	6
HG003+HG004	NovaSeq	10	TRUE	AL	Octopus	genome	3074743	3089772	954941	1935373	0.7639	0.6137	0.6806	4
HG003+HG004	NovaSeq	10	TRUE	AL	GATK4	genome	3005385	3005011	1085303	2004722	0.7347	0.5999	0.6605	4
HG003+HG004	NovaSeq	10	TRUE	AL	FreeBayes	genome	2679379	2631285	1067017	2330790	0.7115	0.5348	0.6106	4
HG003+HG004	NovaSeq	10	TRUE	AL	Octopus	alldifficult	656473	670686	255554	519708	0.7241	0.5581	0.6304	4
HG003+HG004	NovaSeq	10	TRUE	AL	GATK4	alldifficult	606870	606629	268331	569302	0.6933	0.516	0.5916	4
HG003+HG004	NovaSeq	10	TRUE	AL	FreeBayes	alldifficult	541378	525086	248385	634848	0.6789	0.4603	0.5486	4
HG003+HG004	NovaSeq	10	TRUE	AL	Octopus	alllowmapandsegdup	178738	178930	61286	168086	0.7449	0.5154	0.6092	4
HG003+HG004	NovaSeq	10	TRUE	AL	GATK4	alllowmapandsegdup	162563	162603	72637	184253	0.6912	0.4687	0.5586	4
HG003+HG004	NovaSeq	10	TRUE	AL	FreeBayes	alllowmapandsegdup	156312	151601	71688	190512	0.6789	0.4507	0.5418	4
HG003+HG004	NovaSeq	10	TRUE	AL	Octopus	notinalldifficult	2418494	2419599	699426	1415841	0.7758	0.6307	0.6958	4
HG003+HG004	NovaSeq	10	TRUE	AL	GATK4	notinalldifficult	2398743	2398846	817083	1435592	0.7459	0.6256	0.6805	4
HG003+HG004	NovaSeq	10	TRUE	AL	FreeBayes	notinalldifficult	2138099	2106928	840251	1696244	0.7149	0.5576	0.6265	4
HG003+HG004	NovaSeq	10	TRUE	AL	Octopus	notinalllowmapandsegdup	2895852	2910803	893618	1767223	0.7651	0.621	0.6856	4
HG003+HG004	NovaSeq	10	TRUE	AL	GATK4	notinalllowmapandsegdup	2842696	2842367	1012617	1820378	0.7373	0.6096	0.6674	4
HG003+HG004	NovaSeq	10	TRUE	AL	FreeBayes	notinalllowmapandsegdup	2522939	2479713	995688	2140189	0.7135	0.541	0.6154	4
HG003+HG004	NovaSeq	10	TRUE	AL	Octopus	AllTandemRepeatsandHomopolymers	307704	321757	147110	253459	0.6862	0.5483	0.6096	4
HG003+HG004	NovaSeq	10	TRUE	AL	GATK4	AllTandemRepeatsandHomopolymers	276305	276028	138426	284857	0.666	0.4924	0.5662	4
HG003+HG004	NovaSeq	10	TRUE	AL	FreeBayes	AllTandemRepeatsandHomopolymers	234865	226226	120284	326339	0.6529	0.4185	0.5101	4
HG003+HG004	NovaSeq	10	TRUE	AL	Octopus	notinAllTandemRepeatsandHomopolymers	2767387	2768571	807900	1682188	0.7741	0.6219	0.6897	4
HG003+HG004	NovaSeq	10	TRUE	AL	GATK4	notinAllTandemRepeatsandHomopolymers	2729418	2729472	947039	1720149	0.7424	0.6134	0.6718	4
HG003+HG004	NovaSeq	10	TRUE	AL	FreeBayes	notinAllTandemRepeatsandHomopolymers	2444709	2405788	970216	2004878	0.7126	0.5494	0.6205	4
HG003+HG004	NovaSeq	20	TRUE	AL	Octopus	genome	4222387	4251722	505172	787561	0.8938	0.8428	0.8676	4
HG003+HG004	NovaSeq	20	TRUE	AL	GATK4	genome	3952693	3951888	701955	1057341	0.8492	0.789	0.818	4
HG003+HG004	NovaSeq	20	TRUE	AL	FreeBayes	genome	3835983	3760771	726505	1174186	0.8381	0.7656	0.8002	4
HG003+HG004	NovaSeq	20	TRUE	AL	Octopus	alldifficult	926516	954786	158055	249600	0.858	0.7878	0.8214	4
HG003+HG004	NovaSeq	20	TRUE	AL	GATK4	alldifficult	839471	838871	193488	336634	0.8126	0.7138	0.76	4
HG003+HG004	NovaSeq	20	TRUE	AL	FreeBayes	alldifficult	803928	776092	193462	372298	0.8005	0.6835	0.7374	4
HG003+HG004	NovaSeq	20	TRUE	AL	Octopus	alllowmapandsegdup	251857	252144	44682	94959	0.8495	0.7262	0.783	4
HG003+HG004	NovaSeq	20	TRUE	AL	GATK4	alllowmapandsegdup	216190	216241	58419	130626	0.7873	0.6234	0.6958	4
HG003+HG004	NovaSeq	20	TRUE	AL	FreeBayes	alllowmapandsegdup	228148	220864	60472	118676	0.7851	0.6578	0.7158	4
HG003+HG004	NovaSeq	20	TRUE	AL	Octopus	notinalldifficult	3296173	3297677	347200	538059	0.9047	0.8597	0.8816	4
HG003+HG004	NovaSeq	20	TRUE	AL	GATK4	notinalldifficult	3113518	3113651	508538	720811	0.8596	0.812	0.8351	4
HG003+HG004	NovaSeq	20	TRUE	AL	FreeBayes	notinalldifficult	3032274	2985872	550762	802069	0.8443	0.7908	0.8167	4
HG003+HG004	NovaSeq	20	TRUE	AL	Octopus	notinalllowmapandsegdup	3970335	3999530	460489	692580	0.8968	0.8515	0.8735	4
HG003+HG004	NovaSeq	20	TRUE	AL	GATK4	notinalllowmapandsegdup	3736321	3735588	643505	926680	0.8531	0.8013	0.8263	4
HG003+HG004	NovaSeq	20	TRUE	AL	FreeBayes	notinalllowmapandsegdup	3607668	3539974	666322	1055460	0.8416	0.7737	0.8062	4
HG003+HG004	NovaSeq	20	TRUE	AL	Octopus	AllTandemRepeatsandHomopolymers	443564	471652	89977	117543	0.8398	0.7905	0.8144	4
HG003+HG004	NovaSeq	20	TRUE	AL	GATK4	AllTandemRepeatsandHomopolymers	405383	404741	98270	155708	0.8046	0.7225	0.7614	4
HG003+HG004	NovaSeq	20	TRUE	AL	FreeBayes	AllTandemRepeatsandHomopolymers	363585	347334	95082	197619	0.7851	0.6479	0.7099	4
HG003+HG004	NovaSeq	20	TRUE	AL	Octopus	notinAllTandemRepeatsandHomopolymers	3779327	3780907	415276	670136	0.901	0.8494	0.8745	4
HG003+HG004	NovaSeq	20	TRUE	AL	GATK4	notinAllTandemRepeatsandHomopolymers	3547787	3547852	603785	901778	0.8546	0.7973	0.825	4
HG003+HG004	NovaSeq	20	TRUE	AL	FreeBayes	notinAllTandemRepeatsandHomopolymers	3472768	3414647	650664	976819	0.8399	0.7805	0.8091	4
HG003+HG004	NovaSeq	30	TRUE	AL	Octopus	genome	4635896	4672947	297713	374057	0.9401	0.9253	0.9327	4
HG003+HG004	NovaSeq	30	TRUE	AL	GATK4	genome	4368640	4367642	474300	641372	0.902	0.872	0.8868	4
HG003+HG004	NovaSeq	30	TRUE	AL	FreeBayes	genome	4305499	4218209	493179	704653	0.8953	0.8594	0.877	4
HG003+HG004	NovaSeq	30	TRUE	AL	Octopus	alldifficult	1030708	1066740	107339	145367	0.9086	0.8764	0.8922	4
HG003+HG004	NovaSeq	30	TRUE	AL	GATK4	alldifficult	945087	944331	140878	231003	0.8702	0.8036	0.8356	4
HG003+HG004	NovaSeq	30	TRUE	AL	FreeBayes	alldifficult	919988	886697	146056	256223	0.8586	0.7822	0.8186	4
HG003+HG004	NovaSeq	30	TRUE	AL	Octopus	alllowmapandsegdup	281295	281640	38150	65525	0.8807	0.8111	0.8445	4
HG003+HG004	NovaSeq	30	TRUE	AL	GATK4	alllowmapandsegdup	239641	239698	48131	107179	0.8328	0.691	0.7553	4
HG003+HG004	NovaSeq	30	TRUE	AL	FreeBayes	alllowmapandsegdup	258436	249945	51659	88388	0.8287	0.7452	0.7847	4
HG003+HG004	NovaSeq	30	TRUE	AL	Octopus	notinalldifficult	3605553	3607082	190454	228725	0.9498	0.9403	0.9451	4
HG003+HG004	NovaSeq	30	TRUE	AL	GATK4	notinalldifficult	3423882	3424033	333472	410440	0.9113	0.893	0.902	4
HG003+HG004	NovaSeq	30	TRUE	AL	FreeBayes	notinalldifficult	3385819	3332998	359621	448522	0.9026	0.883	0.8927	4
HG003+HG004	NovaSeq	30	TRUE	AL	Octopus	notinalllowmapandsegdup	4354396	4391277	259591	308520	0.9442	0.9338	0.939	4
HG003+HG004	NovaSeq	30	TRUE	AL	GATK4	notinalllowmapandsegdup	4128808	4127895	426146	534167	0.9064	0.8854	0.8958	4
HG003+HG004	NovaSeq	30	TRUE	AL	FreeBayes	notinalllowmapandsegdup	4046886	3968369	441739	616225	0.8998	0.8679	0.8836	4
HG003+HG004	NovaSeq	30	TRUE	AL	Octopus	AllTandemRepeatsandHomopolymers	497708	533574	56169	63354	0.9048	0.8871	0.8958	4
HG003+HG004	NovaSeq	30	TRUE	AL	GATK4	AllTandemRepeatsandHomopolymers	466461	465651	67534	94616	0.8733	0.8314	0.8518	4
HG003+HG004	NovaSeq	30	TRUE	AL	FreeBayes	AllTandemRepeatsandHomopolymers	425260	405340	68932	135930	0.8547	0.7578	0.8033	4
HG003+HG004	NovaSeq	30	TRUE	AL	Octopus	notinAllTandemRepeatsandHomopolymers	4138763	4140326	241606	310750	0.9449	0.9302	0.9375	4
HG003+HG004	NovaSeq	30	TRUE	AL	GATK4	notinAllTandemRepeatsandHomopolymers	3902710	3902786	406831	546847	0.9056	0.8771	0.8911	4
HG003+HG004	NovaSeq	30	TRUE	AL	FreeBayes	notinAllTandemRepeatsandHomopolymers	3880708	3814347	437770	568876	0.897	0.8722	0.8844	4
HG003+HG004	NovaSeq	40	TRUE	AL	Octopus	genome	4785491	4825897	195359	224443	0.9611	0.9552	0.9581	4
HG003+HG004	NovaSeq	40	TRUE	AL	GATK4	genome	4568315	4567216	332807	441673	0.9321	0.9118	0.9218	4
HG003+HG004	NovaSeq	40	TRUE	AL	FreeBayes	genome	4533263	4439944	363203	476882	0.9244	0.9048	0.9145	4
HG003+HG004	NovaSeq	40	TRUE	AL	Octopus	alldifficult	1072939	1112462	81490	103130	0.9317	0.9123	0.9219	4
HG003+HG004	NovaSeq	40	TRUE	AL	GATK4	alldifficult	996618	995767	107033	179448	0.9029	0.8474	0.8743	4
HG003+HG004	NovaSeq	40	TRUE	AL	FreeBayes	alldifficult	981437	945053	118466	194767	0.8886	0.8344	0.8607	4
HG003+HG004	NovaSeq	40	TRUE	AL	Octopus	alllowmapandsegdup	292909	293273	35293	53907	0.8926	0.8446	0.8679	4
HG003+HG004	NovaSeq	40	TRUE	AL	GATK4	alllowmapandsegdup	250699	250757	41149	96117	0.859	0.7229	0.7851	4
HG003+HG004	NovaSeq	40	TRUE	AL	FreeBayes	alllowmapandsegdup	273270	264172	46889	73554	0.8493	0.7879	0.8174	4
HG003+HG004	NovaSeq	40	TRUE	AL	Octopus	notinalldifficult	3712943	3714372	113905	121322	0.9702	0.9684	0.9693	4
HG003+HG004	NovaSeq	40	TRUE	AL	GATK4	notinalldifficult	3572073	3572236	225791	262249	0.9406	0.9316	0.9361	4
HG003+HG004	NovaSeq	40	TRUE	AL	FreeBayes	notinalldifficult	3552175	3496458	253953	282166	0.9323	0.9264	0.9293	4
HG003+HG004	NovaSeq	40	TRUE	AL	Octopus	notinalllowmapandsegdup	4492374	4532596	160080	170527	0.9659	0.9634	0.9647	4
HG003+HG004	NovaSeq	40	TRUE	AL	GATK4	notinalllowmapandsegdup	4317416	4316404	291639	345539	0.9367	0.9259	0.9313	4
HG003+HG004	NovaSeq	40	TRUE	AL	FreeBayes	notinalllowmapandsegdup	4259809	4175883	316507	403295	0.9295	0.9135	0.9215	4
HG003+HG004	NovaSeq	40	TRUE	AL	Octopus	AllTandemRepeatsandHomopolymers	520723	560088	38422	40337	0.9358	0.9281	0.9319	4
HG003+HG004	NovaSeq	40	TRUE	AL	GATK4	AllTandemRepeatsandHomopolymers	496729	495836	47962	64328	0.9118	0.8853	0.8984	4
HG003+HG004	NovaSeq	40	TRUE	AL	FreeBayes	AllTandemRepeatsandHomopolymers	460636	438431	52993	100547	0.8922	0.8208	0.855	4
HG003+HG004	NovaSeq	40	TRUE	AL	Octopus	notinAllTandemRepeatsandHomopolymers	4265371	4266828	156967	184125	0.9645	0.9586	0.9616	4
HG003+HG004	NovaSeq	40	TRUE	AL	GATK4	notinAllTandemRepeatsandHomopolymers	4072163	4072239	284875	377390	0.9346	0.9152	0.9248	4
HG003+HG004	NovaSeq	40	TRUE	AL	FreeBayes	notinAllTandemRepeatsandHomopolymers	4073157	4003071	320191	376427	0.9259	0.9154	0.9206	4
HG003+HG004	NovaSeq	50	TRUE	AL	Octopus	genome	4854163	4896443	139707	155755	0.9723	0.9689	0.9706	4
HG003+HG004	NovaSeq	50	TRUE	AL	GATK4	genome	4682172	4681035	244310	327799	0.9504	0.9346	0.9424	4
HG003+HG004	NovaSeq	50	TRUE	AL	FreeBayes	genome	4658279	4561190	281558	351873	0.9419	0.9298	0.9358	4
HG003+HG004	NovaSeq	50	TRUE	AL	Octopus	alldifficult	1094210	1135682	66806	81847	0.9444	0.9304	0.9374	4
HG003+HG004	NovaSeq	50	TRUE	AL	GATK4	alldifficult	1025737	1024851	85615	150312	0.9229	0.8722	0.8968	4
HG003+HG004	NovaSeq	50	TRUE	AL	FreeBayes	alldifficult	1018312	979817	101151	157899	0.9064	0.8658	0.8856	4
HG003+HG004	NovaSeq	50	TRUE	AL	Octopus	alllowmapandsegdup	298988	299370	33956	47828	0.8981	0.8621	0.8797	4
HG003+HG004	NovaSeq	50	TRUE	AL	GATK4	alllowmapandsegdup	257071	257127	36634	89741	0.8753	0.7412	0.8027	4
HG003+HG004	NovaSeq	50	TRUE	AL	FreeBayes	alllowmapandsegdup	281631	272195	43978	65193	0.8609	0.812	0.8358	4
HG003+HG004	NovaSeq	50	TRUE	AL	Octopus	notinalldifficult	3760340	3761702	72943	73921	0.981	0.9807	0.9808	4
HG003+HG004	NovaSeq	50	TRUE	AL	GATK4	notinalldifficult	3656813	3656983	158705	177508	0.9584	0.9537	0.9561	4
HG003+HG004	NovaSeq	50	TRUE	AL	FreeBayes	notinalldifficult	3640343	3582995	187485	193998	0.9503	0.9494	0.9498	4
HG003+HG004	NovaSeq	50	TRUE	AL	Octopus	notinalllowmapandsegdup	4554964	4597048	105772	107921	0.9775	0.9769	0.9772	4
HG003+HG004	NovaSeq	50	TRUE	AL	GATK4	notinalllowmapandsegdup	4424900	4423855	207660	238042	0.9552	0.949	0.952	4
HG003+HG004	NovaSeq	50	TRUE	AL	FreeBayes	notinalllowmapandsegdup	4376461	4289115	237758	286650	0.9475	0.9385	0.943	4
HG003+HG004	NovaSeq	50	TRUE	AL	Octopus	AllTandemRepeatsandHomopolymers	532706	574033	27917	28348	0.9536	0.9495	0.9515	4
HG003+HG004	NovaSeq	50	TRUE	AL	GATK4	AllTandemRepeatsandHomopolymers	513740	512812	35725	47300	0.9349	0.9157	0.9252	4
HG003+HG004	NovaSeq	50	TRUE	AL	FreeBayes	AllTandemRepeatsandHomopolymers	483091	459295	42827	78099	0.9147	0.8608	0.887	4
HG003+HG004	NovaSeq	50	TRUE	AL	Octopus	notinAllTandemRepeatsandHomopolymers	4322058	4323438	111824	127428	0.9748	0.9714	0.9731	4
HG003+HG004	NovaSeq	50	TRUE	AL	GATK4	notinAllTandemRepeatsandHomopolymers	4169009	4169090	208611	280543	0.9523	0.937	0.9446	4
HG003+HG004	NovaSeq	50	TRUE	AL	FreeBayes	notinAllTandemRepeatsandHomopolymers	4175747	4103517	246391	273837	0.9434	0.9385	0.9409	4
HG003+HG004	NovaSeq	60	TRUE	AL	Octopus	genome	4891825	4935137	107955	118088	0.9786	0.9764	0.9775	4
HG003+HG004	NovaSeq	60	TRUE	AL	GATK4	genome	4754643	4753486	184912	255330	0.9626	0.949	0.9557	4
HG003+HG004	NovaSeq	60	TRUE	AL	FreeBayes	genome	4732932	4633847	226206	277225	0.9535	0.9447	0.949	4
HG003+HG004	NovaSeq	60	TRUE	AL	Octopus	alldifficult	1106242	1148788	58769	69810	0.9513	0.9406	0.946	4
HG003+HG004	NovaSeq	60	TRUE	AL	GATK4	alldifficult	1045432	1044530	70430	130619	0.9368	0.8889	0.9123	4
HG003+HG004	NovaSeq	60	TRUE	AL	FreeBayes	alldifficult	1041008	1001404	88861	135206	0.9185	0.885	0.9015	4
HG003+HG004	NovaSeq	60	TRUE	AL	Octopus	alllowmapandsegdup	302489	302886	33670	44327	0.9	0.8722	0.8859	4
HG003+HG004	NovaSeq	60	TRUE	AL	GATK4	alllowmapandsegdup	261421	261476	33328	85391	0.8869	0.7538	0.815	4
HG003+HG004	NovaSeq	60	TRUE	AL	FreeBayes	alllowmapandsegdup	286849	277202	41791	59975	0.869	0.8271	0.8475	4
HG003+HG004	NovaSeq	60	TRUE	AL	Octopus	notinalldifficult	3785970	3787290	49230	48291	0.9872	0.9874	0.9873	4
HG003+HG004	NovaSeq	60	TRUE	AL	GATK4	notinalldifficult	3709596	3709765	114492	124725	0.9701	0.9675	0.9688	4
HG003+HG004	NovaSeq	60	TRUE	AL	FreeBayes	notinalldifficult	3692303	3634080	143148	142040	0.9621	0.963	0.9625	4
HG003+HG004	NovaSeq	60	TRUE	AL	Octopus	notinalllowmapandsegdup	4589122	4632223	74306	73758	0.9842	0.9842	0.9842	4
HG003+HG004	NovaSeq	60	TRUE	AL	GATK4	notinalllowmapandsegdup	4493016	4491950	151570	169928	0.9674	0.9636	0.9655	4
HG003+HG004	NovaSeq	60	TRUE	AL	FreeBayes	notinalllowmapandsegdup	4445887	4356763	184576	217229	0.9594	0.9534	0.9564	4
HG003+HG004	NovaSeq	60	TRUE	AL	Octopus	AllTandemRepeatsandHomopolymers	539516	581922	21633	21533	0.9642	0.9616	0.9629	4
HG003+HG004	NovaSeq	60	TRUE	AL	GATK4	AllTandemRepeatsandHomopolymers	525350	524403	26960	35692	0.9511	0.9364	0.9437	4
HG003+HG004	NovaSeq	60	TRUE	AL	FreeBayes	AllTandemRepeatsandHomopolymers	496881	472269	35699	64311	0.9297	0.8854	0.907	4
HG003+HG004	NovaSeq	60	TRUE	AL	Octopus	notinAllTandemRepeatsandHomopolymers	4352912	4354245	86357	96574	0.9806	0.9783	0.9794	4
HG003+HG004	NovaSeq	60	TRUE	AL	GATK4	notinAllTandemRepeatsandHomopolymers	4229882	4229963	157975	219670	0.964	0.9506	0.9573	4
HG003+HG004	NovaSeq	60	TRUE	AL	FreeBayes	notinAllTandemRepeatsandHomopolymers	4236623	4163224	196771	212964	0.9549	0.9521	0.9535	4
HG003+HG004	NovaSeq	70	TRUE	AL	Octopus	genome	4914527	4958407	88545	95399	0.9825	0.981	0.9817	4
HG003+HG004	NovaSeq	70	TRUE	AL	GATK4	genome	4801938	4800770	144787	208031	0.9707	0.9585	0.9646	4
HG003+HG004	NovaSeq	70	TRUE	AL	FreeBayes	genome	4782071	4681532	188183	228086	0.9614	0.9545	0.9579	4
HG003+HG004	NovaSeq	70	TRUE	AL	Octopus	alldifficult	1113726	1156879	53706	62324	0.9556	0.947	0.9513	4
HG003+HG004	NovaSeq	70	TRUE	AL	GATK4	alldifficult	1057746	1056833	60693	118301	0.9457	0.8994	0.922	4
HG003+HG004	NovaSeq	70	TRUE	AL	FreeBayes	alldifficult	1056417	1015975	80345	119797	0.9267	0.8982	0.9122	4
HG003+HG004	NovaSeq	70	TRUE	AL	Octopus	alllowmapandsegdup	304681	305076	33676	42135	0.9006	0.8785	0.8894	4
HG003+HG004	NovaSeq	70	TRUE	AL	GATK4	alllowmapandsegdup	264145	264200	31037	82667	0.8949	0.7616	0.8229	4
HG003+HG004	NovaSeq	70	TRUE	AL	FreeBayes	alllowmapandsegdup	290586	280773	40317	56238	0.8744	0.8378	0.8558	4
HG003+HG004	NovaSeq	70	TRUE	AL	Octopus	notinalldifficult	3801194	3802477	34873	33082	0.9909	0.9914	0.9911	4
HG003+HG004	NovaSeq	70	TRUE	AL	GATK4	notinalldifficult	3744584	3744754	84105	89737	0.978	0.9766	0.9773	4
HG003+HG004	NovaSeq	70	TRUE	AL	FreeBayes	notinalldifficult	3726037	3667203	112590	108306	0.9702	0.9718	0.971	4
HG003+HG004	NovaSeq	70	TRUE	AL	Octopus	notinalllowmapandsegdup	4609628	4653303	54894	53265	0.9883	0.9886	0.9885	4
HG003+HG004	NovaSeq	70	TRUE	AL	GATK4	notinalllowmapandsegdup	4537588	4536515	113736	125352	0.9755	0.9731	0.9743	4
HG003+HG004	NovaSeq	70	TRUE	AL	FreeBayes	notinalllowmapandsegdup	4491287	4400881	148022	171829	0.9675	0.9632	0.9653	4
HG003+HG004	NovaSeq	70	TRUE	AL	Octopus	AllTandemRepeatsandHomopolymers	543742	586760	17519	17305	0.971	0.9692	0.9701	4
HG003+HG004	NovaSeq	70	TRUE	AL	GATK4	AllTandemRepeatsandHomopolymers	532711	531754	21389	28327	0.9613	0.9495	0.9554	4
HG003+HG004	NovaSeq	70	TRUE	AL	FreeBayes	AllTandemRepeatsandHomopolymers	506268	481024	30681	54924	0.94	0.9021	0.9207	4
HG003+HG004	NovaSeq	70	TRUE	AL	Octopus	notinAllTandemRepeatsandHomopolymers	4371395	4372686	71051	78106	0.984	0.9824	0.9832	4
HG003+HG004	NovaSeq	70	TRUE	AL	GATK4	notinAllTandemRepeatsandHomopolymers	4269821	4269898	123421	179731	0.9719	0.9596	0.9657	4
HG003+HG004	NovaSeq	70	TRUE	AL	FreeBayes	notinAllTandemRepeatsandHomopolymers	4276380	4202163	162629	173207	0.9627	0.9611	0.9619	4
HG002	NovaSeq	10	TRUE	AL	Octopus	genome	3479049	3501362	37888	411475	0.9893	0.8942	0.9394	2
HG002	NovaSeq	10	TRUE	AL	GATK4	genome	3501177	3501115	62928	389347	0.9823	0.8999	0.9393	2
HG002	NovaSeq	10	TRUE	AL	FreeBayes	genome	3322883	3256226	66585	567641	0.98	0.8541	0.9127	2
HG002	NovaSeq	10	TRUE	AL	Octopus	alldifficult	836319	857724	24745	160293	0.972	0.8392	0.9007	2
HG002	NovaSeq	10	TRUE	AL	GATK4	alldifficult	809348	809440	32679	187264	0.9612	0.8121	0.8804	2
HG002	NovaSeq	10	TRUE	AL	FreeBayes	alldifficult	759669	732713	32211	236943	0.9579	0.7623	0.8489	2
HG002	NovaSeq	10	TRUE	AL	Octopus	alllowmapandsegdup	212725	213068	7167	63984	0.9675	0.7688	0.8567	2
HG002	NovaSeq	10	TRUE	AL	GATK4	alllowmapandsegdup	193607	193661	12970	83102	0.9372	0.6997	0.8012	2
HG002	NovaSeq	10	TRUE	AL	FreeBayes	alllowmapandsegdup	202207	195393	12244	74502	0.941	0.7308	0.8227	2
HG002	NovaSeq	10	TRUE	AL	Octopus	notinalldifficult	2642879	2644178	13146	251216	0.9951	0.9132	0.9524	2
HG002	NovaSeq	10	TRUE	AL	GATK4	notinalldifficult	2691990	2692150	30256	202105	0.9889	0.9302	0.9586	2
HG002	NovaSeq	10	TRUE	AL	FreeBayes	notinalldifficult	2563311	2524588	37761	330784	0.9853	0.8857	0.9328	2
HG002	NovaSeq	10	TRUE	AL	Octopus	notinalllowmapandsegdup	3266137	3288252	30716	347476	0.9907	0.9038	0.9453	2
HG002	NovaSeq	10	TRUE	AL	GATK4	notinalllowmapandsegdup	3307384	3307382	49954	306229	0.9851	0.9153	0.9489	2
HG002	NovaSeq	10	TRUE	AL	FreeBayes	notinalllowmapandsegdup	3120503	3060870	54427	493110	0.9825	0.8635	0.9192	2
HG002	NovaSeq	10	TRUE	AL	Octopus	AllTandemRepeatsandHomopolymers	443030	464273	16922	78752	0.9648	0.8491	0.9033	2
HG002	NovaSeq	10	TRUE	AL	GATK4	AllTandemRepeatsandHomopolymers	430795	430855	18116	90987	0.9596	0.8256	0.8876	2
HG002	NovaSeq	10	TRUE	AL	FreeBayes	AllTandemRepeatsandHomopolymers	381141	364844	18266	140641	0.9523	0.7305	0.8268	2
HG002	NovaSeq	10	TRUE	AL	Octopus	notinAllTandemRepeatsandHomopolymers	3036358	3037752	20970	332801	0.9931	0.9012	0.945	2
HG002	NovaSeq	10	TRUE	AL	GATK4	notinAllTandemRepeatsandHomopolymers	3070735	3070832	44821	298424	0.9856	0.9114	0.9471	2
HG002	NovaSeq	10	TRUE	AL	FreeBayes	notinAllTandemRepeatsandHomopolymers	2942003	2892543	51989	427156	0.9823	0.8732	0.9246	2
HG002	NovaSeq	20	TRUE	AL	Octopus	genome	3763252	3792476	13006	127272	0.9966	0.9673	0.9817	2
HG002	NovaSeq	20	TRUE	AL	GATK4	genome	3766172	3766097	26642	124352	0.993	0.968	0.9803	2
HG002	NovaSeq	20	TRUE	AL	FreeBayes	genome	3754785	3675483	28352	135739	0.9923	0.9651	0.9785	2
HG002	NovaSeq	20	TRUE	AL	Octopus	alldifficult	930336	958530	12100	66276	0.9875	0.9335	0.9598	2
HG002	NovaSeq	20	TRUE	AL	GATK4	alldifficult	904633	904719	19497	91979	0.9789	0.9077	0.942	2
HG002	NovaSeq	20	TRUE	AL	FreeBayes	alldifficult	900861	866865	21605	95751	0.9757	0.9039	0.9384	2
HG002	NovaSeq	20	TRUE	AL	Octopus	alllowmapandsegdup	237599	238045	7953	39110	0.9677	0.8587	0.9099	2
HG002	NovaSeq	20	TRUE	AL	GATK4	alllowmapandsegdup	210357	210418	13661	66352	0.939	0.7602	0.8402	2
HG002	NovaSeq	20	TRUE	AL	FreeBayes	alllowmapandsegdup	235210	226906	11985	41499	0.9498	0.85	0.8972	2
HG002	NovaSeq	20	TRUE	AL	Octopus	notinalldifficult	2833094	2834592	908	61001	0.9997	0.9789	0.9892	2
HG002	NovaSeq	20	TRUE	AL	GATK4	notinalldifficult	2861726	2861906	7143	32369	0.9975	0.9888	0.9931	2
HG002	NovaSeq	20	TRUE	AL	FreeBayes	notinalldifficult	2854123	2809984	8112	39972	0.9971	0.9862	0.9916	2
HG002	NovaSeq	20	TRUE	AL	Octopus	notinalllowmapandsegdup	3525454	3554403	5055	88159	0.9986	0.9756	0.987	2
HG002	NovaSeq	20	TRUE	AL	GATK4	notinalllowmapandsegdup	3555622	3555614	12983	57991	0.9964	0.984	0.9901	2
HG002	NovaSeq	20	TRUE	AL	FreeBayes	notinalllowmapandsegdup	3519369	3448631	16415	94244	0.9953	0.9739	0.9845	2
HG002	NovaSeq	20	TRUE	AL	Octopus	AllTandemRepeatsandHomopolymers	499036	527064	4394	22746	0.9917	0.9564	0.9737	2
HG002	NovaSeq	20	TRUE	AL	GATK4	AllTandemRepeatsandHomopolymers	498153	498208	5828	23629	0.9884	0.9547	0.9713	2
HG002	NovaSeq	20	TRUE	AL	FreeBayes	AllTandemRepeatsandHomopolymers	470065	448703	9680	51717	0.9789	0.9009	0.9383	2
HG002	NovaSeq	20	TRUE	AL	Octopus	notinAllTandemRepeatsandHomopolymers	3264609	3266191	8617	104550	0.9974	0.969	0.983	2
HG002	NovaSeq	20	TRUE	AL	GATK4	notinAllTandemRepeatsandHomopolymers	3268421	3268528	20815	100738	0.9937	0.9701	0.9817	2
HG002	NovaSeq	20	TRUE	AL	FreeBayes	notinAllTandemRepeatsandHomopolymers	3285121	3228248	20150	84038	0.9938	0.9751	0.9843	2
HG002	NovaSeq	30	TRUE	AL	Octopus	genome	3825514	3856419	11423	65010	0.997	0.9833	0.9901	2
HG002	NovaSeq	30	TRUE	AL	GATK4	genome	3805257	3805185	20653	85267	0.9946	0.9781	0.9863	2
HG002	NovaSeq	30	TRUE	AL	FreeBayes	genome	3816631	3734872	26336	73893	0.993	0.981	0.987	2
HG002	NovaSeq	30	TRUE	AL	Octopus	alldifficult	952700	982562	10671	43912	0.9893	0.9559	0.9723	2
HG002	NovaSeq	30	TRUE	AL	GATK4	alldifficult	922008	922097	16459	74604	0.9825	0.9251	0.9529	2
HG002	NovaSeq	30	TRUE	AL	FreeBayes	alldifficult	932169	896406	20506	64443	0.9776	0.9353	0.956	2
HG002	NovaSeq	30	TRUE	AL	Octopus	alllowmapandsegdup	244462	244915	8733	32247	0.9656	0.8835	0.9227	2
HG002	NovaSeq	30	TRUE	AL	GATK4	alllowmapandsegdup	213604	213664	13613	63105	0.9401	0.7719	0.8478	2
HG002	NovaSeq	30	TRUE	AL	FreeBayes	alllowmapandsegdup	242413	233753	12786	34296	0.9481	0.8761	0.9107	2
HG002	NovaSeq	30	TRUE	AL	Octopus	notinalldifficult	2873004	2874526	750	21091	0.9997	0.9927	0.9962	2
HG002	NovaSeq	30	TRUE	AL	GATK4	notinalldifficult	2883436	2883615	4193	10659	0.9985	0.9963	0.9974	2
HG002	NovaSeq	30	TRUE	AL	FreeBayes	notinalldifficult	2884672	2839850	6607	9423	0.9977	0.9967	0.9972	2
HG002	NovaSeq	30	TRUE	AL	Octopus	notinalllowmapandsegdup	3580850	3611480	2691	32763	0.9993	0.9909	0.9951	2
HG002	NovaSeq	30	TRUE	AL	GATK4	notinalllowmapandsegdup	3591453	3591449	7044	22160	0.998	0.9939	0.996	2
HG002	NovaSeq	30	TRUE	AL	FreeBayes	notinalllowmapandsegdup	3574010	3501179	13595	39603	0.9961	0.989	0.9926	2
HG002	NovaSeq	30	TRUE	AL	Octopus	AllTandemRepeatsandHomopolymers	511747	541447	2227	10035	0.9959	0.9808	0.9883	2
HG002	NovaSeq	30	TRUE	AL	GATK4	AllTandemRepeatsandHomopolymers	510600	510656	3031	11182	0.9941	0.9786	0.9863	2
HG002	NovaSeq	30	TRUE	AL	FreeBayes	AllTandemRepeatsandHomopolymers	492007	469331	7866	29775	0.9835	0.9429	0.9628	2
HG002	NovaSeq	30	TRUE	AL	Octopus	notinAllTandemRepeatsandHomopolymers	3314180	3315784	9195	54979	0.9972	0.9837	0.9904	2
HG002	NovaSeq	30	TRUE	AL	GATK4	notinAllTandemRepeatsandHomopolymers	3295062	3295168	17622	74097	0.9947	0.978	0.9863	2
HG002	NovaSeq	30	TRUE	AL	FreeBayes	notinAllTandemRepeatsandHomopolymers	3325052	3267044	19317	44107	0.9941	0.9869	0.9905	2
HG002+HG003+HG004	NovaSeq	10	FALSE	AL	Octopus	genome	2408992	2420015	1607325	2536408	0.6009	0.4871	0.5381	6
HG002+HG003+HG004	NovaSeq	10	FALSE	AL	GATK4	genome	2404480	2404303	1988917	2544209	0.5473	0.4859	0.5148	6
HG002+HG003+HG004	NovaSeq	10	FALSE	AL	FreeBayes	genome	2410574	2369952	2540364	2540329	0.4826	0.4869	0.4848	6
HG002+HG003+HG004	NovaSeq	10	FALSE	AL	Octopus	alldifficult	510118	519989	412540	620090	0.5576	0.4513	0.4989	6
HG002+HG003+HG004	NovaSeq	10	FALSE	AL	GATK4	alldifficult	498831	498750	470469	633624	0.5146	0.4405	0.4747	6
HG002+HG003+HG004	NovaSeq	10	FALSE	AL	FreeBayes	alldifficult	495090	481569	610086	639057	0.4411	0.4365	0.4388	6
HG002+HG003+HG004	NovaSeq	10	FALSE	AL	Octopus	alllowmapandsegdup	142195	142344	105138	193819	0.5752	0.4232	0.4876	6
HG002+HG003+HG004	NovaSeq	10	FALSE	AL	GATK4	alllowmapandsegdup	141051	141092	137914	195000	0.5057	0.4197	0.4587	6
HG002+HG003+HG004	NovaSeq	10	FALSE	AL	FreeBayes	alllowmapandsegdup	144945	140556	174877	191219	0.4456	0.4312	0.4383	6
HG002+HG003+HG004	NovaSeq	10	FALSE	AL	Octopus	notinalldifficult	1898982	1900345	1194919	1916601	0.614	0.4977	0.5497	6
HG002+HG003+HG004	NovaSeq	10	FALSE	AL	GATK4	notinalldifficult	1905749	1905846	1518678	1910876	0.5565	0.4993	0.5264	6
HG002+HG003+HG004	NovaSeq	10	FALSE	AL	FreeBayes	notinalldifficult	1915547	1888979	1971196	1901600	0.4894	0.5018	0.4955	6
HG002+HG003+HG004	NovaSeq	10	FALSE	AL	Octopus	notinalllowmapandsegdup	2266647	2277609	1502155	2342527	0.6026	0.4918	0.5416	6
HG002+HG003+HG004	NovaSeq	10	FALSE	AL	GATK4	notinalllowmapandsegdup	2263292	2263153	1850966	2349135	0.5501	0.4907	0.5187	6
HG002+HG003+HG004	NovaSeq	10	FALSE	AL	FreeBayes	notinalllowmapandsegdup	2265498	2229403	2366355	2349030	0.4851	0.4909	0.488	6
HG002+HG003+HG004	NovaSeq	10	FALSE	AL	Octopus	AllTandemRepeatsandHomopolymers	234142	243813	224531	292908	0.5206	0.4443	0.4794	6
HG002+HG003+HG004	NovaSeq	10	FALSE	AL	GATK4	AllTandemRepeatsandHomopolymers	223929	223815	224399	305261	0.4993	0.4232	0.4581	6
HG002+HG003+HG004	NovaSeq	10	FALSE	AL	FreeBayes	AllTandemRepeatsandHomopolymers	215448	208789	283522	315246	0.4241	0.406	0.4148	6
HG002+HG003+HG004	NovaSeq	10	FALSE	AL	Octopus	notinAllTandemRepeatsandHomopolymers	2175079	2176573	1382971	2243872	0.6115	0.4922	0.5454	6
HG002+HG003+HG004	NovaSeq	10	FALSE	AL	GATK4	notinAllTandemRepeatsandHomopolymers	2180759	2180816	1764807	2239341	0.5527	0.4934	0.5214	6
HG002+HG003+HG004	NovaSeq	10	FALSE	AL	FreeBayes	notinAllTandemRepeatsandHomopolymers	2195292	2161771	2301142	2225519	0.4844	0.4966	0.4904	6
HG002+HG003+HG004	NovaSeq	20	FALSE	AL	Octopus	genome	3400326	3420092	1230916	1543100	0.7353	0.6878	0.7108	6
HG002+HG003+HG004	NovaSeq	20	FALSE	AL	GATK4	genome	3294969	3294611	1741953	1652692	0.6541	0.666	0.66	6
HG002+HG003+HG004	NovaSeq	20	FALSE	AL	FreeBayes	genome	3273955	3215026	2785264	1676532	0.5358	0.6613	0.592	6
HG002+HG003+HG004	NovaSeq	20	FALSE	AL	Octopus	alldifficult	731348	749662	342040	396543	0.6867	0.6484	0.667	6
HG002+HG003+HG004	NovaSeq	20	FALSE	AL	GATK4	alldifficult	698060	697832	442173	433468	0.6121	0.6169	0.6145	6
HG002+HG003+HG004	NovaSeq	20	FALSE	AL	FreeBayes	alldifficult	684181	663580	692691	449564	0.4893	0.6035	0.5404	6
HG002+HG003+HG004	NovaSeq	20	FALSE	AL	Octopus	alllowmapandsegdup	202725	202932	93220	133251	0.6852	0.6034	0.6417	6
HG002+HG003+HG004	NovaSeq	20	FALSE	AL	GATK4	alllowmapandsegdup	195522	195566	145588	140509	0.5732	0.5819	0.5775	6
HG002+HG003+HG004	NovaSeq	20	FALSE	AL	FreeBayes	alllowmapandsegdup	198657	192367	208612	137528	0.4797	0.5909	0.5296	6
HG002+HG003+HG004	NovaSeq	20	FALSE	AL	Octopus	notinalldifficult	2669214	2670997	889089	1146712	0.7503	0.6995	0.724	6
HG002+HG003+HG004	NovaSeq	20	FALSE	AL	GATK4	notinalldifficult	2597113	2597235	1299956	1219411	0.6664	0.6805	0.6734	6
HG002+HG003+HG004	NovaSeq	20	FALSE	AL	FreeBayes	notinalldifficult	2589981	2552406	2130765	1227153	0.545	0.6785	0.6045	6
HG002+HG003+HG004	NovaSeq	20	FALSE	AL	Octopus	notinalllowmapandsegdup	3197441	3217120	1137711	1409797	0.7387	0.694	0.7157	6
HG002+HG003+HG004	NovaSeq	20	FALSE	AL	GATK4	notinalllowmapandsegdup	3099290	3098984	1596324	1512129	0.66	0.6721	0.666	6
HG002+HG003+HG004	NovaSeq	20	FALSE	AL	FreeBayes	notinalllowmapandsegdup	3075151	3022695	2577632	1538940	0.5397	0.6665	0.5964	6
HG002+HG003+HG004	NovaSeq	20	FALSE	AL	Octopus	AllTandemRepeatsandHomopolymers	340470	358556	187344	184371	0.6568	0.6487	0.6527	6
HG002+HG003+HG004	NovaSeq	20	FALSE	AL	GATK4	AllTandemRepeatsandHomopolymers	320369	320115	202795	207952	0.6122	0.6064	0.6093	6
HG002+HG003+HG004	NovaSeq	20	FALSE	AL	FreeBayes	AllTandemRepeatsandHomopolymers	303930	293053	311209	226365	0.485	0.5731	0.5254	6
HG002+HG003+HG004	NovaSeq	20	FALSE	AL	Octopus	notinAllTandemRepeatsandHomopolymers	3060237	3062163	1043793	1358949	0.7458	0.6925	0.7181	6
HG002+HG003+HG004	NovaSeq	20	FALSE	AL	GATK4	notinAllTandemRepeatsandHomopolymers	2974944	2975010	1539395	1444997	0.659	0.6731	0.666	6
HG002+HG003+HG004	NovaSeq	20	FALSE	AL	FreeBayes	notinAllTandemRepeatsandHomopolymers	2970367	2922951	2515245	1450427	0.5375	0.6719	0.5972	6
HG002+HG003+HG004	NovaSeq	30	FALSE	AL	Octopus	genome	3953931	3978771	928384	988228	0.8108	0.8	0.8054	6
HG002+HG003+HG004	NovaSeq	30	FALSE	AL	GATK4	genome	3720501	3720020	1350048	1226528	0.7337	0.7521	0.7428	6
HG002+HG003+HG004	NovaSeq	30	FALSE	AL	FreeBayes	genome	3686060	3617088	2332484	1264136	0.608	0.7446	0.6694	6
HG002+HG003+HG004	NovaSeq	30	FALSE	AL	Octopus	alldifficult	853780	877400	277499	273053	0.7597	0.7577	0.7587	6
HG002+HG003+HG004	NovaSeq	30	FALSE	AL	GATK4	alldifficult	798101	797772	376157	332907	0.6796	0.7057	0.6924	6
HG002+HG003+HG004	NovaSeq	30	FALSE	AL	FreeBayes	alldifficult	777499	752821	608043	355963	0.5532	0.686	0.6125	6
HG002+HG003+HG004	NovaSeq	30	FALSE	AL	Octopus	alllowmapandsegdup	237387	237610	84241	98540	0.7383	0.7067	0.7221	6
HG002+HG003+HG004	NovaSeq	30	FALSE	AL	GATK4	alllowmapandsegdup	221577	221619	136018	114416	0.6197	0.6595	0.639	6
HG002+HG003+HG004	NovaSeq	30	FALSE	AL	FreeBayes	alllowmapandsegdup	223471	216266	192555	112706	0.529	0.6647	0.5892	6
HG002+HG003+HG004	NovaSeq	30	FALSE	AL	Octopus	notinalldifficult	3100450	3102072	651124	715267	0.8265	0.8125	0.8195	6
HG002+HG003+HG004	NovaSeq	30	FALSE	AL	GATK4	notinalldifficult	2922640	2922778	974052	893772	0.75	0.7658	0.7578	6
HG002+HG003+HG004	NovaSeq	30	FALSE	AL	FreeBayes	notinalldifficult	2908806	2865428	1757009	908320	0.6199	0.762	0.6837	6
HG002+HG003+HG004	NovaSeq	30	FALSE	AL	Octopus	notinalllowmapandsegdup	3716374	3741122	844204	889646	0.8159	0.8069	0.8113	6
HG002+HG003+HG004	NovaSeq	30	FALSE	AL	GATK4	notinalllowmapandsegdup	3498747	3498320	1214007	1112077	0.7424	0.7588	0.7505	6
HG002+HG003+HG004	NovaSeq	30	FALSE	AL	FreeBayes	notinalllowmapandsegdup	3462429	3400881	2140898	1151379	0.6137	0.7504	0.6752	6
HG002+HG003+HG004	NovaSeq	30	FALSE	AL	Octopus	AllTandemRepeatsandHomopolymers	398944	422360	147916	124822	0.7406	0.7617	0.751	6
HG002+HG003+HG004	NovaSeq	30	FALSE	AL	GATK4	AllTandemRepeatsandHomopolymers	371875	371516	167808	155989	0.6889	0.7045	0.6966	6
HG002+HG003+HG004	NovaSeq	30	FALSE	AL	FreeBayes	AllTandemRepeatsandHomopolymers	350684	337161	271970	179349	0.5535	0.6616	0.6028	6
HG002+HG003+HG004	NovaSeq	30	FALSE	AL	Octopus	notinAllTandemRepeatsandHomopolymers	3555443	3557177	780715	863551	0.82	0.8046	0.8122	6
HG002+HG003+HG004	NovaSeq	30	FALSE	AL	GATK4	notinAllTandemRepeatsandHomopolymers	3349032	3349114	1182450	1070734	0.7391	0.7577	0.7483	6
HG002+HG003+HG004	NovaSeq	30	FALSE	AL	FreeBayes	notinAllTandemRepeatsandHomopolymers	3335780	3281111	2095528	1084987	0.6103	0.7546	0.6748	6
HG002+HG003+HG004	NovaSeq	40	FALSE	AL	Octopus	genome	4252234	4280462	705791	689378	0.8585	0.8605	0.8595	6
HG002+HG003+HG004	NovaSeq	40	FALSE	AL	GATK4	genome	3977773	3977201	1097261	969009	0.7838	0.8041	0.7938	6
HG002+HG003+HG004	NovaSeq	40	FALSE	AL	FreeBayes	genome	3930962	3856056	1640918	1019088	0.7015	0.7941	0.7449	6
HG002+HG003+HG004	NovaSeq	40	FALSE	AL	Octopus	alldifficult	921338	948431	228228	205019	0.806	0.818	0.812	6
HG002+HG003+HG004	NovaSeq	40	FALSE	AL	GATK4	alldifficult	857486	857092	327820	273294	0.7233	0.7583	0.7404	6
HG002+HG003+HG004	NovaSeq	40	FALSE	AL	FreeBayes	alldifficult	834376	807292	478850	298946	0.6277	0.7362	0.6776	6
HG002+HG003+HG004	NovaSeq	40	FALSE	AL	Octopus	alllowmapandsegdup	256122	256375	77643	79774	0.7675	0.7625	0.765	6
HG002+HG003+HG004	NovaSeq	40	FALSE	AL	GATK4	alllowmapandsegdup	236496	236552	130459	99482	0.6445	0.7039	0.6729	6
HG002+HG003+HG004	NovaSeq	40	FALSE	AL	FreeBayes	alllowmapandsegdup	237591	229979	158074	98583	0.5926	0.7068	0.6447	6
HG002+HG003+HG004	NovaSeq	40	FALSE	AL	Octopus	notinalldifficult	3331198	3332792	477844	484448	0.8746	0.873	0.8738	6
HG002+HG003+HG004	NovaSeq	40	FALSE	AL	GATK4	notinalldifficult	3120564	3120717	769580	695829	0.8022	0.8177	0.8099	6
HG002+HG003+HG004	NovaSeq	40	FALSE	AL	FreeBayes	notinalldifficult	3096862	3050014	1187456	720259	0.7198	0.8113	0.7628	6
HG002+HG003+HG004	NovaSeq	40	FALSE	AL	Octopus	notinalllowmapandsegdup	3995918	4024042	628252	609586	0.865	0.8676	0.8663	6
HG002+HG003+HG004	NovaSeq	40	FALSE	AL	GATK4	notinalllowmapandsegdup	3741098	3740587	966786	869494	0.7946	0.8114	0.8029	6
HG002+HG003+HG004	NovaSeq	40	FALSE	AL	FreeBayes	notinalllowmapandsegdup	3693213	3626157	1483619	920452	0.7097	0.8005	0.7523	6
HG002+HG003+HG004	NovaSeq	40	FALSE	AL	Octopus	AllTandemRepeatsandHomopolymers	432193	459104	116627	91110	0.7974	0.8259	0.8114	6
HG002+HG003+HG004	NovaSeq	40	FALSE	AL	GATK4	AllTandemRepeatsandHomopolymers	403139	402706	138851	124519	0.7436	0.764	0.7537	6
HG002+HG003+HG004	NovaSeq	40	FALSE	AL	FreeBayes	AllTandemRepeatsandHomopolymers	380515	365252	216995	149375	0.6273	0.7181	0.6696	6
HG002+HG003+HG004	NovaSeq	40	FALSE	AL	Octopus	notinAllTandemRepeatsandHomopolymers	3820516	3822190	589417	598394	0.8664	0.8646	0.8655	6
HG002+HG003+HG004	NovaSeq	40	FALSE	AL	GATK4	notinAllTandemRepeatsandHomopolymers	3575075	3575162	958597	844650	0.7886	0.8089	0.7986	6
HG002+HG003+HG004	NovaSeq	40	FALSE	AL	FreeBayes	notinAllTandemRepeatsandHomopolymers	3550884	3492061	1451267	869881	0.7064	0.8032	0.7517	6
HG002+HG003+HG004	NovaSeq	50	FALSE	AL	Octopus	genome	4425914	4456197	554290	514977	0.8894	0.8958	0.8926	6
HG002+HG003+HG004	NovaSeq	50	FALSE	AL	GATK4	genome	4157058	4156438	920652	789657	0.8187	0.8404	0.8294	6
HG002+HG003+HG004	NovaSeq	50	FALSE	AL	FreeBayes	genome	4100654	4021505	1273203	849256	0.7595	0.8284	0.7925	6
HG002+HG003+HG004	NovaSeq	50	FALSE	AL	Octopus	alldifficult	961578	990840	193791	164401	0.8364	0.854	0.8451	6
HG002+HG003+HG004	NovaSeq	50	FALSE	AL	GATK4	alldifficult	898687	898252	292040	232023	0.7546	0.7948	0.7742	6
HG002+HG003+HG004	NovaSeq	50	FALSE	AL	FreeBayes	alldifficult	873779	844844	403637	259436	0.6767	0.7711	0.7208	6
HG002+HG003+HG004	NovaSeq	50	FALSE	AL	Octopus	alllowmapandsegdup	266766	267047	73226	69132	0.7848	0.7942	0.7895	6
HG002+HG003+HG004	NovaSeq	50	FALSE	AL	GATK4	alllowmapandsegdup	246488	246536	126441	89500	0.661	0.7336	0.6954	6
HG002+HG003+HG004	NovaSeq	50	FALSE	AL	FreeBayes	alllowmapandsegdup	246966	239012	138462	89203	0.6332	0.7346	0.6802	6
HG002+HG003+HG004	NovaSeq	50	FALSE	AL	Octopus	notinalldifficult	3464669	3466164	360725	350635	0.9057	0.9081	0.9069	6
HG002+HG003+HG004	NovaSeq	50	FALSE	AL	GATK4	notinalldifficult	3258697	3258860	628692	557699	0.8383	0.8539	0.846	6
HG002+HG003+HG004	NovaSeq	50	FALSE	AL	FreeBayes	notinalldifficult	3227195	3177971	889797	589893	0.7813	0.8455	0.8121	6
HG002+HG003+HG004	NovaSeq	50	FALSE	AL	Octopus	notinalllowmapandsegdup	4158954	4189113	481170	445827	0.897	0.9032	0.9001	6
HG002+HG003+HG004	NovaSeq	50	FALSE	AL	GATK4	notinalllowmapandsegdup	3910393	3909836	794182	700123	0.8312	0.8481	0.8396	6
HG002+HG003+HG004	NovaSeq	50	FALSE	AL	FreeBayes	notinalllowmapandsegdup	3853526	3782583	1135395	760004	0.7691	0.8353	0.8008	6
HG002+HG003+HG004	NovaSeq	50	FALSE	AL	Octopus	AllTandemRepeatsandHomopolymers	452761	481842	94322	70216	0.8363	0.8657	0.8508	6
HG002+HG003+HG004	NovaSeq	50	FALSE	AL	GATK4	AllTandemRepeatsandHomopolymers	424911	424433	116899	102665	0.7841	0.8054	0.7946	6
HG002+HG003+HG004	NovaSeq	50	FALSE	AL	FreeBayes	AllTandemRepeatsandHomopolymers	401765	385180	182518	128035	0.6785	0.7583	0.7162	6
HG002+HG003+HG004	NovaSeq	50	FALSE	AL	Octopus	notinAllTandemRepeatsandHomopolymers	3973669	3975237	460169	444847	0.8963	0.8993	0.8978	6
HG002+HG003+HG004	NovaSeq	50	FALSE	AL	GATK4	notinAllTandemRepeatsandHomopolymers	3732652	3732749	803877	687088	0.8228	0.8445	0.8335	6
HG002+HG003+HG004	NovaSeq	50	FALSE	AL	FreeBayes	notinAllTandemRepeatsandHomopolymers	3699383	3637646	1112483	721330	0.7658	0.8368	0.7997	6
HG002+HG003+HG004	NovaSeq	60	FALSE	AL	Octopus	genome	4537376	4569102	448900	403105	0.9105	0.9184	0.9145	6
HG002+HG003+HG004	NovaSeq	60	FALSE	AL	GATK4	genome	4287848	4287183	781485	658841	0.8458	0.8668	0.8562	6
HG002+HG003+HG004	NovaSeq	60	FALSE	AL	FreeBayes	genome	4228923	4146740	1079160	720964	0.7935	0.8543	0.8228	6
HG002+HG003+HG004	NovaSeq	60	FALSE	AL	Octopus	alldifficult	987948	1018735	168837	137765	0.8578	0.8776	0.8676	6
HG002+HG003+HG004	NovaSeq	60	FALSE	AL	GATK4	alldifficult	929070	928594	262971	201625	0.7793	0.8217	0.7999	6
HG002+HG003+HG004	NovaSeq	60	FALSE	AL	FreeBayes	alldifficult	903264	873011	360221	229924	0.7079	0.7971	0.7499	6
HG002+HG003+HG004	NovaSeq	60	FALSE	AL	Octopus	alllowmapandsegdup	273478	273767	70482	62384	0.7953	0.8143	0.8046	6
HG002+HG003+HG004	NovaSeq	60	FALSE	AL	GATK4	alllowmapandsegdup	254006	254055	121467	81960	0.6765	0.756	0.7141	6
HG002+HG003+HG004	NovaSeq	60	FALSE	AL	FreeBayes	alllowmapandsegdup	253782	245588	127303	82374	0.6586	0.755	0.7035	6
HG002+HG003+HG004	NovaSeq	60	FALSE	AL	Octopus	notinalldifficult	3549777	3551193	280283	265382	0.9268	0.9304	0.9286	6
HG002+HG003+HG004	NovaSeq	60	FALSE	AL	GATK4	notinalldifficult	3359092	3359258	518609	457293	0.8663	0.8802	0.8732	6
HG002+HG003+HG004	NovaSeq	60	FALSE	AL	FreeBayes	notinalldifficult	3325994	3275082	735910	491099	0.8165	0.8713	0.843	6
HG002+HG003+HG004	NovaSeq	60	FALSE	AL	Octopus	notinalllowmapandsegdup	4263704	4295304	378537	340703	0.919	0.926	0.9225	6
HG002+HG003+HG004	NovaSeq	60	FALSE	AL	GATK4	notinalllowmapandsegdup	4033661	4033062	659993	576851	0.8594	0.8749	0.8671	6
HG002+HG003+HG004	NovaSeq	60	FALSE	AL	FreeBayes	notinalllowmapandsegdup	3974972	3901242	952417	638548	0.8038	0.8616	0.8317	6
HG002+HG003+HG004	NovaSeq	60	FALSE	AL	Octopus	AllTandemRepeatsandHomopolymers	466706	497329	77525	56068	0.8651	0.8927	0.8787	6
HG002+HG003+HG004	NovaSeq	60	FALSE	AL	GATK4	AllTandemRepeatsandHomopolymers	440799	440282	100593	86795	0.814	0.8355	0.8246	6
HG002+HG003+HG004	NovaSeq	60	FALSE	AL	FreeBayes	AllTandemRepeatsandHomopolymers	417595	400098	161897	112191	0.7119	0.7882	0.7481	6
HG002+HG003+HG004	NovaSeq	60	FALSE	AL	Octopus	notinAllTandemRepeatsandHomopolymers	4071212	4072679	371545	347096	0.9164	0.9214	0.9189	6
HG002+HG003+HG004	NovaSeq	60	FALSE	AL	GATK4	notinAllTandemRepeatsandHomopolymers	3847543	3847637	681026	572153	0.8496	0.8705	0.86	6
HG002+HG003+HG004	NovaSeq	60	FALSE	AL	FreeBayes	notinAllTandemRepeatsandHomopolymers	3811828	3747990	935576	608876	0.8002	0.8623	0.8301	6
HG002+HG003+HG004	NovaSeq	70	FALSE	AL	Octopus	genome	4615585	4648370	372617	325123	0.9258	0.9342	0.93	6
HG002+HG003+HG004	NovaSeq	70	FALSE	AL	GATK4	genome	4388143	4387460	672045	558467	0.8672	0.8871	0.877	6
HG002+HG003+HG004	NovaSeq	70	FALSE	AL	FreeBayes	genome	4327778	4243277	945091	622091	0.8178	0.8743	0.8451	6
HG002+HG003+HG004	NovaSeq	70	FALSE	AL	Octopus	alldifficult	1006910	1038838	150468	118801	0.8735	0.8945	0.8838	6
HG002+HG003+HG004	NovaSeq	70	FALSE	AL	GATK4	alldifficult	952463	951985	239458	178148	0.799	0.8424	0.8202	6
HG002+HG003+HG004	NovaSeq	70	FALSE	AL	FreeBayes	alldifficult	926206	894884	329832	206958	0.7307	0.8174	0.7716	6
HG002+HG003+HG004	NovaSeq	70	FALSE	AL	Octopus	alllowmapandsegdup	278209	278485	68513	57658	0.8026	0.8283	0.8152	6
HG002+HG003+HG004	NovaSeq	70	FALSE	AL	GATK4	alllowmapandsegdup	259646	259700	117047	76316	0.6893	0.7728	0.7287	6
HG002+HG003+HG004	NovaSeq	70	FALSE	AL	FreeBayes	alllowmapandsegdup	259030	250678	119922	77131	0.6764	0.7706	0.7204	6
HG002+HG003+HG004	NovaSeq	70	FALSE	AL	Octopus	notinalldifficult	3609028	3610383	222389	206360	0.942	0.9459	0.9439	6
HG002+HG003+HG004	NovaSeq	70	FALSE	AL	GATK4	notinalldifficult	3436022	3436195	432648	380368	0.8882	0.9003	0.8942	6
HG002+HG003+HG004	NovaSeq	70	FALSE	AL	FreeBayes	notinalldifficult	3401908	3349765	629803	415189	0.8417	0.8912	0.8658	6
HG002+HG003+HG004	NovaSeq	70	FALSE	AL	Octopus	notinalllowmapandsegdup	4337180	4369843	304242	267449	0.9349	0.9419	0.9384	6
HG002+HG003+HG004	NovaSeq	70	FALSE	AL	GATK4	notinalllowmapandsegdup	4128311	4127695	554976	482126	0.8815	0.8954	0.8884	6
HG002+HG003+HG004	NovaSeq	70	FALSE	AL	FreeBayes	notinalllowmapandsegdup	4068582	3992696	825674	544915	0.8286	0.8819	0.8544	6
HG002+HG003+HG004	NovaSeq	70	FALSE	AL	Octopus	AllTandemRepeatsandHomopolymers	476899	508673	64941	45836	0.8868	0.9123	0.8994	6
HG002+HG003+HG004	NovaSeq	70	FALSE	AL	GATK4	AllTandemRepeatsandHomopolymers	453516	452993	87032	73995	0.8388	0.8597	0.8492	6
HG002+HG003+HG004	NovaSeq	70	FALSE	AL	FreeBayes	AllTandemRepeatsandHomopolymers	430273	412011	146629	99487	0.7375	0.8122	0.7731	6
HG002+HG003+HG004	NovaSeq	70	FALSE	AL	Octopus	notinAllTandemRepeatsandHomopolymers	4139235	4140624	307846	279339	0.9308	0.9368	0.9338	6
HG002+HG003+HG004	NovaSeq	70	FALSE	AL	GATK4	notinAllTandemRepeatsandHomopolymers	3935145	3935242	585115	484555	0.8706	0.8904	0.8804	6
HG002+HG003+HG004	NovaSeq	70	FALSE	AL	FreeBayes	notinAllTandemRepeatsandHomopolymers	3898013	3832638	814116	522697	0.8248	0.8818	0.8523	6
HG002+HG003+HG004	NovaSeq	80	FALSE	AL	Octopus	genome	4671981	4705535	316257	268574	0.937	0.9456	0.9413	6
HG002+HG003+HG004	NovaSeq	80	FALSE	AL	GATK4	genome	4466658	4465926	587208	479956	0.8838	0.903	0.8933	6
HG002+HG003+HG004	NovaSeq	80	FALSE	AL	FreeBayes	genome	4405110	4318742	844942	544678	0.8364	0.89	0.8623	6
HG002+HG003+HG004	NovaSeq	80	FALSE	AL	Octopus	alldifficult	1021186	1053983	136423	104458	0.8854	0.9072	0.8962	6
HG002+HG003+HG004	NovaSeq	80	FALSE	AL	GATK4	alldifficult	970771	970243	220937	159837	0.8145	0.8586	0.836	6
HG002+HG003+HG004	NovaSeq	80	FALSE	AL	FreeBayes	alldifficult	944233	912172	306379	188850	0.7486	0.8333	0.7887	6
HG002+HG003+HG004	NovaSeq	80	FALSE	AL	Octopus	alllowmapandsegdup	281791	282070	66893	54064	0.8083	0.839	0.8234	6
HG002+HG003+HG004	NovaSeq	80	FALSE	AL	GATK4	alllowmapandsegdup	263914	263966	113601	72056	0.6991	0.7855	0.7398	6
HG002+HG003+HG004	NovaSeq	80	FALSE	AL	FreeBayes	alllowmapandsegdup	263166	254668	113954	72993	0.6909	0.7829	0.734	6
HG002+HG003+HG004	NovaSeq	80	FALSE	AL	Octopus	notinalldifficult	3651167	3652425	180043	164135	0.953	0.957	0.955	6
HG002+HG003+HG004	NovaSeq	80	FALSE	AL	GATK4	notinalldifficult	3496237	3496411	366321	320160	0.9052	0.9161	0.9106	6
HG002+HG003+HG004	NovaSeq	80	FALSE	AL	FreeBayes	notinalldifficult	3461236	3407955	551238	355861	0.8608	0.9068	0.8832	6
HG002+HG003+HG004	NovaSeq	80	FALSE	AL	Octopus	notinalllowmapandsegdup	4389993	4423429	249489	214495	0.9466	0.9534	0.95	6
HG002+HG003+HG004	NovaSeq	80	FALSE	AL	GATK4	notinalllowmapandsegdup	4202564	4201905	473577	407869	0.8987	0.9115	0.9051	6
HG002+HG003+HG004	NovaSeq	80	FALSE	AL	FreeBayes	notinalllowmapandsegdup	4141773	4064175	731452	471645	0.8475	0.8978	0.8719	6
HG002+HG003+HG004	NovaSeq	80	FALSE	AL	Octopus	AllTandemRepeatsandHomopolymers	484650	517298	55325	38050	0.9034	0.9272	0.9151	6
HG002+HG003+HG004	NovaSeq	80	FALSE	AL	GATK4	AllTandemRepeatsandHomopolymers	463356	462780	76578	64149	0.858	0.8784	0.8681	6
HG002+HG003+HG004	NovaSeq	80	FALSE	AL	FreeBayes	AllTandemRepeatsandHomopolymers	440234	421427	134795	89450	0.7577	0.8311	0.7927	6
HG002+HG003+HG004	NovaSeq	80	FALSE	AL	Octopus	notinAllTandemRepeatsandHomopolymers	4187897	4189185	261076	230559	0.9413	0.9478	0.9446	6
HG002+HG003+HG004	NovaSeq	80	FALSE	AL	GATK4	notinAllTandemRepeatsandHomopolymers	4003827	4003922	510723	415883	0.8869	0.9059	0.8963	6
HG002+HG003+HG004	NovaSeq	80	FALSE	AL	FreeBayes	notinAllTandemRepeatsandHomopolymers	3965407	3898694	723794	455298	0.8434	0.897	0.8694	6
HG002+HG003+HG004	NovaSeq	90	FALSE	AL	Octopus	genome	4713838	4747956	274454	226649	0.9454	0.9541	0.9497	6
HG002+HG003+HG004	NovaSeq	90	FALSE	AL	GATK4	genome	4530631	4529905	520169	415380	0.897	0.916	0.9064	6
HG002+HG003+HG004	NovaSeq	90	FALSE	AL	FreeBayes	genome	4467647	4379780	766359	482113	0.8511	0.9026	0.8761	6
HG002+HG003+HG004	NovaSeq	90	FALSE	AL	Octopus	alldifficult	1031357	1064760	126430	94274	0.8939	0.9162	0.9049	6
HG002+HG003+HG004	NovaSeq	90	FALSE	AL	GATK4	alldifficult	985480	984961	206418	144982	0.8267	0.8717	0.8486	6
HG002+HG003+HG004	NovaSeq	90	FALSE	AL	FreeBayes	alldifficult	959253	926579	287562	173808	0.7632	0.8466	0.8027	6
HG002+HG003+HG004	NovaSeq	90	FALSE	AL	Octopus	alllowmapandsegdup	284270	284555	65883	51554	0.812	0.8465	0.8289	6
HG002+HG003+HG004	NovaSeq	90	FALSE	AL	GATK4	alllowmapandsegdup	267546	267601	111123	68359	0.7066	0.7965	0.7489	6
HG002+HG003+HG004	NovaSeq	90	FALSE	AL	FreeBayes	alllowmapandsegdup	266770	258131	109289	69384	0.7026	0.7936	0.7453	6
HG002+HG003+HG004	NovaSeq	90	FALSE	AL	Octopus	notinalldifficult	3682863	3684091	148241	132384	0.9613	0.9653	0.9633	6
HG002+HG003+HG004	NovaSeq	90	FALSE	AL	GATK4	notinalldifficult	3545505	3545680	313801	270435	0.9187	0.9291	0.9239	6
HG002+HG003+HG004	NovaSeq	90	FALSE	AL	FreeBayes	notinalldifficult	3508760	3454610	489987	308331	0.8758	0.9192	0.897	6
HG002+HG003+HG004	NovaSeq	90	FALSE	AL	Octopus	notinalllowmapandsegdup	4429370	4463370	208716	175080	0.9553	0.962	0.9586	6
HG002+HG003+HG004	NovaSeq	90	FALSE	AL	GATK4	notinalllowmapandsegdup	4262897	4262245	409025	346998	0.9124	0.9247	0.9185	6
HG002+HG003+HG004	NovaSeq	90	FALSE	AL	FreeBayes	notinalllowmapandsegdup	4200702	4121746	657513	412693	0.8624	0.9105	0.8858	6
HG002+HG003+HG004	NovaSeq	90	FALSE	AL	Octopus	AllTandemRepeatsandHomopolymers	490060	523319	48488	32666	0.9152	0.9375	0.9262	6
HG002+HG003+HG004	NovaSeq	90	FALSE	AL	GATK4	AllTandemRepeatsandHomopolymers	471133	470563	68096	56305	0.8736	0.8932	0.8833	6
HG002+HG003+HG004	NovaSeq	90	FALSE	AL	FreeBayes	AllTandemRepeatsandHomopolymers	448279	429081	125298	81378	0.774	0.8464	0.8086	6
HG002+HG003+HG004	NovaSeq	90	FALSE	AL	Octopus	notinAllTandemRepeatsandHomopolymers	4224354	4225599	226123	194008	0.9492	0.9561	0.9526	6
HG002+HG003+HG004	NovaSeq	90	FALSE	AL	GATK4	notinAllTandemRepeatsandHomopolymers	4060028	4060125	452161	359146	0.8998	0.9187	0.9092	6
HG002+HG003+HG004	NovaSeq	90	FALSE	AL	FreeBayes	notinAllTandemRepeatsandHomopolymers	4019905	3952100	653112	400799	0.8582	0.9093	0.883	6
HG002+HG003+HG004	NovaSeq	100	FALSE	AL	Octopus	genome	4745966	4780498	242483	194471	0.9517	0.9606	0.9562	6
HG002+HG003+HG004	NovaSeq	100	FALSE	AL	GATK4	genome	4582951	4582203	466802	363046	0.9075	0.9266	0.917	6
HG002+HG003+HG004	NovaSeq	100	FALSE	AL	FreeBayes	genome	4518618	4429498	704629	431166	0.8628	0.9129	0.8871	6
HG002+HG003+HG004	NovaSeq	100	FALSE	AL	Octopus	alldifficult	1039304	1073186	118835	86282	0.9003	0.9233	0.9117	6
HG002+HG003+HG004	NovaSeq	100	FALSE	AL	GATK4	alldifficult	997605	997068	194976	132845	0.8364	0.8825	0.8588	6
HG002+HG003+HG004	NovaSeq	100	FALSE	AL	FreeBayes	alldifficult	971268	938083	272929	161811	0.7746	0.8572	0.8138	6
HG002+HG003+HG004	NovaSeq	100	FALSE	AL	Octopus	alllowmapandsegdup	286192	286481	65431	49659	0.8141	0.8521	0.8327	6
HG002+HG003+HG004	NovaSeq	100	FALSE	AL	GATK4	alllowmapandsegdup	270316	270374	109675	65589	0.7114	0.8047	0.7552	6
HG002+HG003+HG004	NovaSeq	100	FALSE	AL	FreeBayes	alllowmapandsegdup	269427	260680	105906	66729	0.7111	0.8015	0.7536	6
HG002+HG003+HG004	NovaSeq	100	FALSE	AL	Octopus	notinalldifficult	3707031	3708193	123879	108211	0.9677	0.9716	0.9697	6
HG002+HG003+HG004	NovaSeq	100	FALSE	AL	GATK4	notinalldifficult	3585707	3585879	271867	230231	0.9295	0.9397	0.9346	6
HG002+HG003+HG004	NovaSeq	100	FALSE	AL	FreeBayes	notinalldifficult	3547714	3492816	441794	269383	0.8877	0.9294	0.9081	6
HG002+HG003+HG004	NovaSeq	100	FALSE	AL	Octopus	notinalllowmapandsegdup	4459574	4493985	177194	144799	0.9621	0.9686	0.9653	6
HG002+HG003+HG004	NovaSeq	100	FALSE	AL	GATK4	notinalllowmapandsegdup	4312448	4311775	357105	297433	0.9235	0.9355	0.9295	6
HG002+HG003+HG004	NovaSeq	100	FALSE	AL	FreeBayes	notinalllowmapandsegdup	4249017	4168920	599126	364400	0.8743	0.921	0.8971	6
HG002+HG003+HG004	NovaSeq	100	FALSE	AL	Octopus	AllTandemRepeatsandHomopolymers	494544	528287	42750	28129	0.9251	0.9462	0.9355	6
HG002+HG003+HG004	NovaSeq	100	FALSE	AL	GATK4	AllTandemRepeatsandHomopolymers	477774	477183	61017	49658	0.8866	0.9058	0.8961	6
HG002+HG003+HG004	NovaSeq	100	FALSE	AL	FreeBayes	AllTandemRepeatsandHomopolymers	454937	435409	117732	74741	0.7872	0.8589	0.8215	6
HG002+HG003+HG004	NovaSeq	100	FALSE	AL	Octopus	notinAllTandemRepeatsandHomopolymers	4251986	4253161	199898	166379	0.9551	0.9623	0.9587	6
HG002+HG003+HG004	NovaSeq	100	FALSE	AL	GATK4	notinAllTandemRepeatsandHomopolymers	4105719	4105814	405863	313447	0.91	0.9291	0.9195	6
HG002+HG003+HG004	NovaSeq	100	FALSE	AL	FreeBayes	notinAllTandemRepeatsandHomopolymers	4064223	3995483	597804	356484	0.8699	0.9194	0.8939	6
HG003+HG004	NovaSeq	10	FALSE	AL	Octopus	genome	3144661	3164469	1013396	1865407	0.7574	0.6277	0.6865	4
HG003+HG004	NovaSeq	10	FALSE	AL	GATK4	genome	3230885	3230499	1290034	1779205	0.7146	0.6449	0.678	4
HG003+HG004	NovaSeq	10	FALSE	AL	FreeBayes	genome	3230544	3172271	1907626	1779625	0.6245	0.6448	0.6345	4
HG003+HG004	NovaSeq	10	FALSE	AL	Octopus	alldifficult	686906	705197	287754	489237	0.7102	0.584	0.641	4
HG003+HG004	NovaSeq	10	FALSE	AL	GATK4	alldifficult	684788	684542	334712	491367	0.6716	0.5822	0.6237	4
HG003+HG004	NovaSeq	10	FALSE	AL	FreeBayes	alldifficult	677794	657132	490879	498432	0.5724	0.5762	0.5743	4
HG003+HG004	NovaSeq	10	FALSE	AL	Octopus	alllowmapandsegdup	187919	188172	71765	158902	0.7239	0.5418	0.6198	4
HG003+HG004	NovaSeq	10	FALSE	AL	GATK4	alllowmapandsegdup	191687	191731	99897	155129	0.6575	0.5527	0.6005	4
HG003+HG004	NovaSeq	10	FALSE	AL	FreeBayes	alllowmapandsegdup	197140	190903	140135	149684	0.5767	0.5684	0.5725	4
HG003+HG004	NovaSeq	10	FALSE	AL	Octopus	notinalldifficult	2457988	2459819	725714	1376337	0.7722	0.641	0.7005	4
HG003+HG004	NovaSeq	10	FALSE	AL	GATK4	notinalldifficult	2546307	2546418	955444	1288028	0.7272	0.6641	0.6942	4
HG003+HG004	NovaSeq	10	FALSE	AL	FreeBayes	notinalldifficult	2552942	2516112	1451557	1281401	0.6342	0.6658	0.6496	4
HG003+HG004	NovaSeq	10	FALSE	AL	Octopus	notinalllowmapandsegdup	2956588	2976259	941603	1706442	0.7597	0.634	0.6912	4
HG003+HG004	NovaSeq	10	FALSE	AL	GATK4	notinalllowmapandsegdup	3039054	3038713	1190094	1624003	0.7186	0.6517	0.6835	4
HG003+HG004	NovaSeq	10	FALSE	AL	FreeBayes	notinalllowmapandsegdup	3033262	2981416	1768141	1629866	0.6277	0.6505	0.6389	4
HG003+HG004	NovaSeq	10	FALSE	AL	Octopus	AllTandemRepeatsandHomopolymers	325862	343890	166670	235269	0.6736	0.5807	0.6237	4
HG003+HG004	NovaSeq	10	FALSE	AL	GATK4	AllTandemRepeatsandHomopolymers	314588	314304	166463	246557	0.6538	0.5606	0.6036	4
HG003+HG004	NovaSeq	10	FALSE	AL	FreeBayes	AllTandemRepeatsandHomopolymers	301444	290457	236645	259760	0.551	0.5371	0.544	4
HG003+HG004	NovaSeq	10	FALSE	AL	Octopus	notinAllTandemRepeatsandHomopolymers	2819163	2821176	846824	1630396	0.7691	0.6336	0.6948	4
HG003+HG004	NovaSeq	10	FALSE	AL	GATK4	notinAllTandemRepeatsandHomopolymers	2916633	2916693	1123739	1532934	0.7219	0.6555	0.6871	4
HG003+HG004	NovaSeq	10	FALSE	AL	FreeBayes	notinAllTandemRepeatsandHomopolymers	2929410	2882787	1708635	1520177	0.6279	0.6584	0.6427	4
HG003+HG004	NovaSeq	20	FALSE	AL	Octopus	genome	4259859	4295366	542080	749929	0.8879	0.8503	0.8687	4
HG003+HG004	NovaSeq	20	FALSE	AL	GATK4	genome	4179161	4178349	840597	830854	0.8325	0.8342	0.8333	4
HG003+HG004	NovaSeq	20	FALSE	AL	FreeBayes	genome	4157103	4074264	1663373	853066	0.7101	0.8297	0.7653	4
HG003+HG004	NovaSeq	20	FALSE	AL	Octopus	alldifficult	949509	983495	181353	226512	0.8443	0.8074	0.8254	4
HG003+HG004	NovaSeq	20	FALSE	AL	GATK4	alldifficult	920179	919581	251971	255907	0.7849	0.7824	0.7837	4
HG003+HG004	NovaSeq	20	FALSE	AL	FreeBayes	alldifficult	901852	869954	454208	274374	0.657	0.7667	0.7076	4
HG003+HG004	NovaSeq	20	FALSE	AL	Octopus	alllowmapandsegdup	258261	258612	53214	88550	0.8293	0.7447	0.7847	4
HG003+HG004	NovaSeq	20	FALSE	AL	GATK4	alllowmapandsegdup	253219	253273	92340	93597	0.7328	0.7301	0.7315	4
HG003+HG004	NovaSeq	20	FALSE	AL	FreeBayes	alllowmapandsegdup	257699	249102	143719	89125	0.6341	0.743	0.6843	4
HG003+HG004	NovaSeq	20	FALSE	AL	Octopus	notinalldifficult	3310655	3312635	360839	523512	0.9018	0.8635	0.8822	4
HG003+HG004	NovaSeq	20	FALSE	AL	GATK4	notinalldifficult	3259294	3259445	588730	575035	0.847	0.85	0.8485	4
HG003+HG004	NovaSeq	20	FALSE	AL	FreeBayes	notinalldifficult	3255549	3205733	1236904	578794	0.7216	0.8491	0.7801	4
HG003+HG004	NovaSeq	20	FALSE	AL	Octopus	notinalllowmapandsegdup	4001400	4036705	488880	661360	0.892	0.8582	0.8747	4
HG003+HG004	NovaSeq	20	FALSE	AL	GATK4	notinalllowmapandsegdup	3925753	3925014	748244	737229	0.8399	0.8419	0.8409	4
HG003+HG004	NovaSeq	20	FALSE	AL	FreeBayes	notinalllowmapandsegdup	3899222	3825241	1520320	763906	0.7156	0.8362	0.7712	4
HG003+HG004	NovaSeq	20	FALSE	AL	Octopus	AllTandemRepeatsandHomopolymers	458972	492703	103583	102053	0.8263	0.8181	0.8222	4
HG003+HG004	NovaSeq	20	FALSE	AL	GATK4	AllTandemRepeatsandHomopolymers	439250	438605	115582	121822	0.7914	0.7829	0.7871	4
HG003+HG004	NovaSeq	20	FALSE	AL	FreeBayes	AllTandemRepeatsandHomopolymers	416525	397827	208274	144679	0.6564	0.7422	0.6967	4
HG003+HG004	NovaSeq	20	FALSE	AL	Octopus	notinAllTandemRepeatsandHomopolymers	3801395	3803525	438599	647990	0.8966	0.8544	0.875	4
HG003+HG004	NovaSeq	20	FALSE	AL	GATK4	notinAllTandemRepeatsandHomopolymers	3740412	3740491	725143	709153	0.8376	0.8406	0.8391	4
HG003+HG004	NovaSeq	20	FALSE	AL	FreeBayes	notinAllTandemRepeatsandHomopolymers	3741052	3677879	1484962	708535	0.7124	0.8408	0.7713	4
HG003+HG004	NovaSeq	30	FALSE	AL	Octopus	genome	4660726	4704251	325252	349032	0.9353	0.9303	0.9328	4
HG003+HG004	NovaSeq	30	FALSE	AL	GATK4	genome	4496079	4495071	576103	513907	0.8864	0.8974	0.8919	4
HG003+HG004	NovaSeq	30	FALSE	AL	FreeBayes	genome	4460647	4368253	1194802	549505	0.7852	0.8903	0.8345	4
HG003+HG004	NovaSeq	30	FALSE	AL	Octopus	alldifficult	1048045	1090222	125134	127939	0.897	0.8912	0.8941	4
HG003+HG004	NovaSeq	30	FALSE	AL	GATK4	alldifficult	1004519	1003756	196269	171545	0.8364	0.8541	0.8452	4
HG003+HG004	NovaSeq	30	FALSE	AL	FreeBayes	alldifficult	983056	946379	352582	193155	0.7286	0.8358	0.7785	4
HG003+HG004	NovaSeq	30	FALSE	AL	Octopus	alllowmapandsegdup	286743	287136	46432	60073	0.8608	0.8268	0.8435	4
HG003+HG004	NovaSeq	30	FALSE	AL	GATK4	alllowmapandsegdup	274522	274581	86690	72294	0.76	0.7915	0.7755	4
HG003+HG004	NovaSeq	30	FALSE	AL	FreeBayes	alllowmapandsegdup	277373	267904	122205	69451	0.6867	0.7998	0.739	4
HG003+HG004	NovaSeq	30	FALSE	AL	Octopus	notinalldifficult	3613047	3614927	200246	221127	0.9475	0.9423	0.9449	4
HG003+HG004	NovaSeq	30	FALSE	AL	GATK4	notinalldifficult	3491907	3492066	379908	342415	0.9019	0.9107	0.9063	4
HG003+HG004	NovaSeq	30	FALSE	AL	FreeBayes	notinalldifficult	3477961	3423519	863288	356380	0.7986	0.9071	0.8494	4
HG003+HG004	NovaSeq	30	FALSE	AL	Octopus	notinalllowmapandsegdup	4373778	4417088	278872	288947	0.9406	0.938	0.9393	4
HG003+HG004	NovaSeq	30	FALSE	AL	GATK4	notinalllowmapandsegdup	4221357	4220436	489398	441596	0.8961	0.9053	0.9007	4
HG003+HG004	NovaSeq	30	FALSE	AL	FreeBayes	notinalllowmapandsegdup	4183090	4100466	1073149	480021	0.7926	0.8971	0.8416	4
HG003+HG004	NovaSeq	30	FALSE	AL	Octopus	AllTandemRepeatsandHomopolymers	508945	550924	64626	52038	0.895	0.9072	0.9011	4
HG003+HG004	NovaSeq	30	FALSE	AL	GATK4	AllTandemRepeatsandHomopolymers	486413	485595	79594	74638	0.8592	0.867	0.8631	4
HG003+HG004	NovaSeq	30	FALSE	AL	FreeBayes	AllTandemRepeatsandHomopolymers	462857	440656	158286	98333	0.7357	0.8248	0.7777	4
HG003+HG004	NovaSeq	30	FALSE	AL	Octopus	notinAllTandemRepeatsandHomopolymers	4152358	4154309	260727	297039	0.9409	0.9332	0.9371	4
HG003+HG004	NovaSeq	30	FALSE	AL	GATK4	notinAllTandemRepeatsandHomopolymers	4010221	4010302	496606	439336	0.8898	0.9013	0.8955	4
HG003+HG004	NovaSeq	30	FALSE	AL	FreeBayes	notinAllTandemRepeatsandHomopolymers	3998337	3929239	1059080	451247	0.7877	0.8986	0.8395	4
HG003+HG004	NovaSeq	40	FALSE	AL	Octopus	genome	4803184	4850172	217119	206527	0.9572	0.9588	0.958	4
HG003+HG004	NovaSeq	40	FALSE	AL	GATK4	genome	4655443	4654340	422342	354523	0.9168	0.9292	0.923	4
HG003+HG004	NovaSeq	40	FALSE	AL	FreeBayes	genome	4613066	4516131	758029	397079	0.8563	0.9207	0.8873	4
HG003+HG004	NovaSeq	40	FALSE	AL	Octopus	alldifficult	1086744	1132555	95663	89232	0.9221	0.9241	0.9231	4
HG003+HG004	NovaSeq	40	FALSE	AL	GATK4	alldifficult	1047039	1046186	162034	129005	0.8659	0.8903	0.8779	4
HG003+HG004	NovaSeq	40	FALSE	AL	FreeBayes	alldifficult	1024504	985350	264878	151700	0.7881	0.871	0.8275	4
HG003+HG004	NovaSeq	40	FALSE	AL	Octopus	alllowmapandsegdup	297879	298303	43489	48923	0.8728	0.8589	0.8658	4
HG003+HG004	NovaSeq	40	FALSE	AL	GATK4	alllowmapandsegdup	285184	285244	82016	61628	0.7767	0.8223	0.7988	4
HG003+HG004	NovaSeq	40	FALSE	AL	FreeBayes	alllowmapandsegdup	286655	276805	99076	60169	0.7364	0.8265	0.7789	4
HG003+HG004	NovaSeq	40	FALSE	AL	Octopus	notinalldifficult	3716831	3718574	121536	117304	0.9684	0.9694	0.9689	4
HG003+HG004	NovaSeq	40	FALSE	AL	GATK4	notinalldifficult	3608785	3608954	260336	225537	0.9327	0.9412	0.9369	4
HG003+HG004	NovaSeq	40	FALSE	AL	FreeBayes	notinalldifficult	3588960	3532476	508181	245381	0.8742	0.936	0.9041	4
HG003+HG004	NovaSeq	40	FALSE	AL	Octopus	notinalllowmapandsegdup	4505098	4551851	173676	157594	0.9632	0.9662	0.9647	4
HG003+HG004	NovaSeq	40	FALSE	AL	GATK4	notinalllowmapandsegdup	4370055	4369042	340310	292882	0.9277	0.9372	0.9324	4
HG003+HG004	NovaSeq	40	FALSE	AL	FreeBayes	notinalllowmapandsegdup	4326224	4239446	659388	336880	0.8654	0.9278	0.8955	4
HG003+HG004	NovaSeq	40	FALSE	AL	Octopus	AllTandemRepeatsandHomopolymers	529251	574872	43552	31745	0.9296	0.9434	0.9364	4
HG003+HG004	NovaSeq	40	FALSE	AL	GATK4	AllTandemRepeatsandHomopolymers	510235	509338	57896	50800	0.8979	0.9095	0.9037	4
HG003+HG004	NovaSeq	40	FALSE	AL	FreeBayes	AllTandemRepeatsandHomopolymers	487570	463439	117496	73613	0.7977	0.8688	0.8318	4
HG003+HG004	NovaSeq	40	FALSE	AL	Octopus	notinAllTandemRepeatsandHomopolymers	4274537	4276339	173626	174800	0.961	0.9607	0.9608	4
HG003+HG004	NovaSeq	40	FALSE	AL	GATK4	notinAllTandemRepeatsandHomopolymers	4145797	4145877	364502	303756	0.9192	0.9317	0.9254	4
HG003+HG004	NovaSeq	40	FALSE	AL	FreeBayes	notinAllTandemRepeatsandHomopolymers	4126077	4054378	656662	323507	0.8606	0.9273	0.8927	4
HG003+HG004	NovaSeq	50	FALSE	AL	Octopus	genome	4868046	4916757	158150	141494	0.9688	0.9718	0.9703	4
HG003+HG004	NovaSeq	50	FALSE	AL	GATK4	genome	4748878	4747731	325483	261081	0.9358	0.9479	0.9418	4
HG003+HG004	NovaSeq	50	FALSE	AL	FreeBayes	genome	4706617	4606663	553795	303535	0.8927	0.9394	0.9155	4
HG003+HG004	NovaSeq	50	FALSE	AL	Octopus	alldifficult	1105975	1153624	78868	69962	0.936	0.9405	0.9383	4
HG003+HG004	NovaSeq	50	FALSE	AL	GATK4	alldifficult	1071549	1070655	139808	104488	0.8845	0.9112	0.8976	4
HG003+HG004	NovaSeq	50	FALSE	AL	FreeBayes	alldifficult	1050604	1009722	218420	125607	0.8222	0.8932	0.8562	4
HG003+HG004	NovaSeq	50	FALSE	AL	Octopus	alllowmapandsegdup	303539	303979	41950	43260	0.8787	0.8753	0.877	4
HG003+HG004	NovaSeq	50	FALSE	AL	GATK4	alllowmapandsegdup	291259	291316	78328	55553	0.7881	0.8398	0.8131	4
HG003+HG004	NovaSeq	50	FALSE	AL	FreeBayes	alllowmapandsegdup	292201	282129	86859	54623	0.7646	0.8425	0.8017	4
HG003+HG004	NovaSeq	50	FALSE	AL	Octopus	notinalldifficult	3762456	3764090	79372	71547	0.9793	0.9813	0.9803	4
HG003+HG004	NovaSeq	50	FALSE	AL	GATK4	notinalldifficult	3677720	3677895	185685	156601	0.9519	0.9592	0.9555	4
HG003+HG004	NovaSeq	50	FALSE	AL	FreeBayes	notinalldifficult	3656415	3598653	346325	177926	0.9122	0.9536	0.9324	4
HG003+HG004	NovaSeq	50	FALSE	AL	Octopus	notinalllowmapandsegdup	4564294	4612760	116260	98230	0.9754	0.9789	0.9772	4
HG003+HG004	NovaSeq	50	FALSE	AL	GATK4	notinalllowmapandsegdup	4457415	4456362	247139	205515	0.9475	0.9559	0.9517	4
HG003+HG004	NovaSeq	50	FALSE	AL	FreeBayes	notinalllowmapandsegdup	4414228	4324664	467282	248883	0.9025	0.9466	0.924	4
HG003+HG004	NovaSeq	50	FALSE	AL	Octopus	AllTandemRepeatsandHomopolymers	539726	587193	31156	21246	0.9496	0.9621	0.9558	4
HG003+HG004	NovaSeq	50	FALSE	AL	GATK4	AllTandemRepeatsandHomopolymers	523924	522987	44567	37104	0.9215	0.9339	0.9276	4
HG003+HG004	NovaSeq	50	FALSE	AL	FreeBayes	AllTandemRepeatsandHomopolymers	503537	478050	94455	57653	0.835	0.8973	0.865	4
HG003+HG004	NovaSeq	50	FALSE	AL	Octopus	notinAllTandemRepeatsandHomopolymers	4328922	4330607	127052	120268	0.9715	0.973	0.9722	4
HG003+HG004	NovaSeq	50	FALSE	AL	GATK4	notinAllTandemRepeatsandHomopolymers	4225548	4225632	280955	224004	0.9377	0.9497	0.9436	4
HG003+HG004	NovaSeq	50	FALSE	AL	FreeBayes	notinAllTandemRepeatsandHomopolymers	4203664	4130320	471111	245920	0.8976	0.9447	0.9206	4
HG003+HG004	NovaSeq	60	FALSE	AL	Octopus	genome	4903667	4953431	124384	105778	0.9755	0.9789	0.9772	4
HG003+HG004	NovaSeq	60	FALSE	AL	GATK4	genome	4810295	4809133	264044	199670	0.948	0.9601	0.954	4
HG003+HG004	NovaSeq	60	FALSE	AL	FreeBayes	genome	4768732	4667156	455132	241425	0.9111	0.9518	0.931	4
HG003+HG004	NovaSeq	60	FALSE	AL	Octopus	alldifficult	1116773	1165527	69614	59101	0.9436	0.9497	0.9467	4
HG003+HG004	NovaSeq	60	FALSE	AL	GATK4	alldifficult	1088439	1087534	125290	87604	0.8967	0.9255	0.9109	4
HG003+HG004	NovaSeq	60	FALSE	AL	FreeBayes	alldifficult	1068117	1026352	193076	108097	0.8417	0.9081	0.8736	4
HG003+HG004	NovaSeq	60	FALSE	AL	Octopus	alllowmapandsegdup	306774	307226	41541	40018	0.8809	0.8846	0.8827	4
HG003+HG004	NovaSeq	60	FALSE	AL	GATK4	alllowmapandsegdup	295699	295756	76253	51113	0.795	0.8526	0.8228	4
HG003+HG004	NovaSeq	60	FALSE	AL	FreeBayes	alllowmapandsegdup	296238	285995	80410	50586	0.7805	0.8541	0.8157	4
HG003+HG004	NovaSeq	60	FALSE	AL	Octopus	notinalldifficult	3787281	3788858	54853	46690	0.9857	0.9878	0.9868	4
HG003+HG004	NovaSeq	60	FALSE	AL	GATK4	notinalldifficult	3722244	3722418	138763	112077	0.9641	0.9708	0.9674	4
HG003+HG004	NovaSeq	60	FALSE	AL	FreeBayes	notinalldifficult	3701011	3642506	270766	133332	0.9308	0.9652	0.9477	4
HG003+HG004	NovaSeq	60	FALSE	AL	Octopus	notinalllowmapandsegdup	4596678	4646183	82894	65758	0.9825	0.9859	0.9842	4
HG003+HG004	NovaSeq	60	FALSE	AL	GATK4	notinalllowmapandsegdup	4514388	4513320	187779	148548	0.9601	0.9681	0.9641	4
HG003+HG004	NovaSeq	60	FALSE	AL	FreeBayes	notinalllowmapandsegdup	4472295	4381286	375027	190821	0.9212	0.9591	0.9397	4
HG003+HG004	NovaSeq	60	FALSE	AL	Octopus	AllTandemRepeatsandHomopolymers	545671	594253	23780	15300	0.9615	0.9727	0.9671	4
HG003+HG004	NovaSeq	60	FALSE	AL	GATK4	AllTandemRepeatsandHomopolymers	533214	532263	35291	27820	0.9378	0.9504	0.9441	4
HG003+HG004	NovaSeq	60	FALSE	AL	FreeBayes	AllTandemRepeatsandHomopolymers	513894	487748	81391	47298	0.857	0.9157	0.8854	4
HG003+HG004	NovaSeq	60	FALSE	AL	Octopus	notinAllTandemRepeatsandHomopolymers	4358601	4360222	100662	90495	0.9774	0.9797	0.9785	4
HG003+HG004	NovaSeq	60	FALSE	AL	GATK4	notinAllTandemRepeatsandHomopolymers	4277676	4277758	228784	171876	0.9492	0.9614	0.9553	4
HG003+HG004	NovaSeq	60	FALSE	AL	FreeBayes	notinAllTandemRepeatsandHomopolymers	4255433	4181122	383098	194154	0.9161	0.9564	0.9358	4
HG003+HG004	NovaSeq	70	FALSE	AL	Octopus	genome	4925270	4975462	103725	84201	0.9796	0.9832	0.9814	4
HG003+HG004	NovaSeq	70	FALSE	AL	GATK4	genome	4851327	4850157	224192	158632	0.9558	0.9683	0.962	4
HG003+HG004	NovaSeq	70	FALSE	AL	FreeBayes	genome	4811279	4708515	392289	198878	0.9231	0.9603	0.9413	4
HG003+HG004	NovaSeq	70	FALSE	AL	Octopus	alldifficult	1123570	1172814	63628	52349	0.9485	0.9555	0.952	4
HG003+HG004	NovaSeq	70	FALSE	AL	GATK4	alldifficult	1098980	1098070	116501	77059	0.9041	0.9345	0.919	4
HG003+HG004	NovaSeq	70	FALSE	AL	FreeBayes	alldifficult	1080162	1037743	176346	96052	0.8548	0.9183	0.8854	4
HG003+HG004	NovaSeq	70	FALSE	AL	Octopus	alllowmapandsegdup	308784	309235	41474	38012	0.8817	0.8904	0.886	4
HG003+HG004	NovaSeq	70	FALSE	AL	GATK4	alllowmapandsegdup	298537	298596	75449	48275	0.7983	0.8608	0.8284	4
HG003+HG004	NovaSeq	70	FALSE	AL	FreeBayes	alllowmapandsegdup	298930	288578	76328	47894	0.7908	0.8619	0.8248	4
HG003+HG004	NovaSeq	70	FALSE	AL	Octopus	notinalldifficult	3802092	3803612	40170	31860	0.9895	0.9917	0.9906	4
HG003+HG004	NovaSeq	70	FALSE	AL	GATK4	notinalldifficult	3752736	3752912	107697	81583	0.9721	0.9787	0.9754	4
HG003+HG004	NovaSeq	70	FALSE	AL	FreeBayes	notinalldifficult	3731516	3672474	223092	102827	0.9427	0.9732	0.9577	4
HG003+HG004	NovaSeq	70	FALSE	AL	Octopus	notinalllowmapandsegdup	4616267	4666209	62301	46191	0.9868	0.9901	0.9885	4
HG003+HG004	NovaSeq	70	FALSE	AL	GATK4	notinalllowmapandsegdup	4552583	4551511	148731	110347	0.9684	0.9763	0.9723	4
HG003+HG004	NovaSeq	70	FALSE	AL	FreeBayes	notinalllowmapandsegdup	4512149	4420065	316240	150967	0.9332	0.9676	0.9501	4
HG003+HG004	NovaSeq	70	FALSE	AL	Octopus	AllTandemRepeatsandHomopolymers	549403	598493	18848	11558	0.9695	0.9794	0.9744	4
HG003+HG004	NovaSeq	70	FALSE	AL	GATK4	AllTandemRepeatsandHomopolymers	539035	538077	29197	21995	0.9485	0.9608	0.9546	4
HG003+HG004	NovaSeq	70	FALSE	AL	FreeBayes	AllTandemRepeatsandHomopolymers	521202	494550	72402	39990	0.8723	0.9287	0.8996	4
HG003+HG004	NovaSeq	70	FALSE	AL	Octopus	notinAllTandemRepeatsandHomopolymers	4376478	4378024	84932	72654	0.981	0.9837	0.9823	4
HG003+HG004	NovaSeq	70	FALSE	AL	GATK4	notinAllTandemRepeatsandHomopolymers	4312888	4312968	195024	136662	0.9567	0.9693	0.963	4
HG003+HG004	NovaSeq	70	FALSE	AL	FreeBayes	notinAllTandemRepeatsandHomopolymers	4290673	4215678	327551	158914	0.9279	0.9643	0.9457	4
HG002	NovaSeq	10	FALSE	AL	Octopus	genome	3685900	3711736	69056	204624	0.9817	0.9474	0.9643	2
HG002	NovaSeq	10	FALSE	AL	GATK4	genome	3687589	3687525	128669	202935	0.9663	0.9478	0.957	2
HG002	NovaSeq	10	FALSE	AL	FreeBayes	genome	3688892	3613027	515632	201632	0.8751	0.9482	0.9102	2
HG002	NovaSeq	10	FALSE	AL	Octopus	alldifficult	899516	924177	39327	97096	0.9592	0.9026	0.93	2
HG002	NovaSeq	10	FALSE	AL	GATK4	alldifficult	889652	889755	61460	106960	0.9354	0.8927	0.9135	2
HG002	NovaSeq	10	FALSE	AL	FreeBayes	alldifficult	881678	849708	179714	114934	0.8254	0.8847	0.854	2
HG002	NovaSeq	10	FALSE	AL	Octopus	alllowmapandsegdup	231514	231918	13305	45195	0.9457	0.8367	0.8879	2
HG002	NovaSeq	10	FALSE	AL	GATK4	alllowmapandsegdup	229688	229755	29307	47021	0.8869	0.8301	0.8575	2
HG002	NovaSeq	10	FALSE	AL	FreeBayes	alllowmapandsegdup	235688	227328	57441	41021	0.7983	0.8518	0.8242	2
HG002	NovaSeq	10	FALSE	AL	Octopus	notinalldifficult	2786556	2788149	29732	107539	0.9894	0.9628	0.976	2
HG002	NovaSeq	10	FALSE	AL	GATK4	notinalldifficult	2798106	2798277	67224	95989	0.9765	0.9668	0.9717	2
HG002	NovaSeq	10	FALSE	AL	FreeBayes	notinalldifficult	2807383	2764656	346018	86712	0.8888	0.97	0.9276	2
HG002	NovaSeq	10	FALSE	AL	Octopus	notinalllowmapandsegdup	3454196	3479787	55747	159417	0.9842	0.9559	0.9699	2
HG002	NovaSeq	10	FALSE	AL	GATK4	notinalllowmapandsegdup	3457703	3457700	99361	155910	0.9721	0.9569	0.9644	2
HG002	NovaSeq	10	FALSE	AL	FreeBayes	notinalllowmapandsegdup	3453000	3385752	458504	160613	0.8807	0.9556	0.9166	2
HG002	NovaSeq	10	FALSE	AL	Octopus	AllTandemRepeatsandHomopolymers	477821	502280	24423	43961	0.9536	0.9157	0.9343	2
HG002	NovaSeq	10	FALSE	AL	GATK4	AllTandemRepeatsandHomopolymers	468168	468240	28129	53614	0.9433	0.8972	0.9197	2
HG002	NovaSeq	10	FALSE	AL	FreeBayes	AllTandemRepeatsandHomopolymers	453412	434004	94965	68370	0.8205	0.869	0.844	2
HG002	NovaSeq	10	FALSE	AL	Octopus	notinAllTandemRepeatsandHomopolymers	3208461	3210180	44638	160698	0.9863	0.9523	0.969	2
HG002	NovaSeq	10	FALSE	AL	GATK4	notinAllTandemRepeatsandHomopolymers	3219798	3219900	100571	149361	0.9697	0.9557	0.9626	2
HG002	NovaSeq	10	FALSE	AL	FreeBayes	notinAllTandemRepeatsandHomopolymers	3235850	3180464	431505	133309	0.8805	0.9604	0.9187	2
HG002	NovaSeq	20	FALSE	AL	Octopus	genome	3846037	3877553	26297	44487	0.9933	0.9886	0.9909	2
HG002	NovaSeq	20	FALSE	AL	GATK4	genome	3844056	3843985	61056	46468	0.9844	0.9881	0.9862	2
HG002	NovaSeq	20	FALSE	AL	FreeBayes	genome	3832753	3749996	274947	57771	0.9317	0.9852	0.9577	2
HG002	NovaSeq	20	FALSE	AL	Octopus	alldifficult	960672	990961	21163	35940	0.9791	0.9639	0.9715	2
HG002	NovaSeq	20	FALSE	AL	GATK4	alldifficult	956732	956829	43045	39880	0.9569	0.96	0.9585	2
HG002	NovaSeq	20	FALSE	AL	FreeBayes	alldifficult	946604	909978	114285	50008	0.8884	0.9498	0.9181	2
HG002	NovaSeq	20	FALSE	AL	Octopus	alllowmapandsegdup	248850	249327	13828	27859	0.9475	0.8993	0.9228	2
HG002	NovaSeq	20	FALSE	AL	GATK4	alllowmapandsegdup	247370	247439	31174	29339	0.8881	0.894	0.891	2
HG002	NovaSeq	20	FALSE	AL	FreeBayes	alllowmapandsegdup	250914	241656	45450	25795	0.8417	0.9068	0.873	2
HG002	NovaSeq	20	FALSE	AL	Octopus	notinalldifficult	2885545	2887254	5144	8550	0.9982	0.997	0.9976	2
HG002	NovaSeq	20	FALSE	AL	GATK4	notinalldifficult	2887508	2887694	18014	6587	0.9938	0.9977	0.9958	2
HG002	NovaSeq	20	FALSE	AL	FreeBayes	notinalldifficult	2886360	2841467	166650	7735	0.9446	0.9973	0.9702	2
HG002	NovaSeq	20	FALSE	AL	Octopus	notinalllowmapandsegdup	3596984	3628200	12474	16629	0.9966	0.9954	0.996	2
HG002	NovaSeq	20	FALSE	AL	GATK4	notinalllowmapandsegdup	3596482	3596478	29893	17131	0.9918	0.9953	0.9935	2
HG002	NovaSeq	20	FALSE	AL	FreeBayes	notinalllowmapandsegdup	3581631	3508418	229727	31982	0.9385	0.9911	0.9641	2
HG002	NovaSeq	20	FALSE	AL	Octopus	AllTandemRepeatsandHomopolymers	514681	544767	7515	7101	0.9864	0.9864	0.9864	2
HG002	NovaSeq	20	FALSE	AL	GATK4	AllTandemRepeatsandHomopolymers	511579	511649	11227	10203	0.9785	0.9804	0.9795	2
HG002	NovaSeq	20	FALSE	AL	FreeBayes	AllTandemRepeatsandHomopolymers	497796	474888	57018	23986	0.8928	0.954	0.9224	2
HG002	NovaSeq	20	FALSE	AL	Octopus	notinAllTandemRepeatsandHomopolymers	3331763	3333589	18794	37396	0.9944	0.9889	0.9916	2
HG002	NovaSeq	20	FALSE	AL	GATK4	notinAllTandemRepeatsandHomopolymers	3332889	3332995	49834	36270	0.9853	0.9892	0.9872	2
HG002	NovaSeq	20	FALSE	AL	FreeBayes	notinAllTandemRepeatsandHomopolymers	3335390	3276676	224365	33769	0.9359	0.99	0.9622	2
HG002	NovaSeq	30	FALSE	AL	Octopus	genome	3862414	3894832	21279	28110	0.9946	0.9928	0.9937	2
HG002	NovaSeq	30	FALSE	AL	GATK4	genome	3859131	3859057	50807	31393	0.987	0.9919	0.9895	2
HG002	NovaSeq	30	FALSE	AL	FreeBayes	genome	3848920	3765072	125182	41604	0.9678	0.9893	0.9784	2
HG002	NovaSeq	30	FALSE	AL	Octopus	alldifficult	970151	1001329	18803	26461	0.9816	0.9734	0.9775	2
HG002	NovaSeq	30	FALSE	AL	GATK4	alldifficult	967012	967106	39675	29600	0.9606	0.9703	0.9654	2
HG002	NovaSeq	30	FALSE	AL	FreeBayes	alldifficult	958733	921158	73965	37879	0.9257	0.962	0.9435	2
HG002	NovaSeq	30	FALSE	AL	Octopus	alllowmapandsegdup	253221	253705	15262	23488	0.9433	0.9151	0.929	2
HG002	NovaSeq	30	FALSE	AL	GATK4	alllowmapandsegdup	251378	251446	32466	25331	0.8856	0.9085	0.8969	2
HG002	NovaSeq	30	FALSE	AL	FreeBayes	alllowmapandsegdup	253753	244316	35783	22956	0.8722	0.917	0.8941	2
HG002	NovaSeq	30	FALSE	AL	Octopus	notinalldifficult	2892448	2894178	2482	1647	0.9991	0.9994	0.9993	2
HG002	NovaSeq	30	FALSE	AL	GATK4	notinalldifficult	2892304	2892490	11131	1791	0.9962	0.9994	0.9978	2
HG002	NovaSeq	30	FALSE	AL	FreeBayes	notinalldifficult	2890394	2845345	54624	3701	0.9812	0.9987	0.9899	2
HG002	NovaSeq	30	FALSE	AL	Octopus	notinalllowmapandsegdup	3608988	3641104	6022	4625	0.9983	0.9987	0.9985	2
HG002	NovaSeq	30	FALSE	AL	GATK4	notinalllowmapandsegdup	3607551	3607545	18349	6062	0.9949	0.9983	0.9966	2
HG002	NovaSeq	30	FALSE	AL	FreeBayes	notinalllowmapandsegdup	3594958	3520835	89546	18655	0.9752	0.9948	0.9849	2
HG002	NovaSeq	30	FALSE	AL	Octopus	AllTandemRepeatsandHomopolymers	519154	550152	3928	2628	0.9929	0.995	0.9939	2
HG002	NovaSeq	30	FALSE	AL	GATK4	AllTandemRepeatsandHomopolymers	517575	517641	7056	4207	0.9866	0.9919	0.9892	2
HG002	NovaSeq	30	FALSE	AL	FreeBayes	AllTandemRepeatsandHomopolymers	506904	483244	34306	14878	0.9337	0.9715	0.9522	2
HG002	NovaSeq	30	FALSE	AL	Octopus	notinAllTandemRepeatsandHomopolymers	3343674	3345501	17355	25485	0.9948	0.9924	0.9936	2
HG002	NovaSeq	30	FALSE	AL	GATK4	notinAllTandemRepeatsandHomopolymers	3341971	3342076	43755	27188	0.9871	0.9919	0.9895	2
HG002	NovaSeq	30	FALSE	AL	FreeBayes	notinAllTandemRepeatsandHomopolymers	3342450	3283380	94547	26709	0.972	0.9921	0.9819	2
