# Supplementary material for: Benchmarking small-variant genotyping in polyploids
Source: Genome Res. 2022 Feb;32(2):403–8. doi: 10.1101/gr.275579.121 (PMC8805713; doi:10.1101/gr.275579.121)
Supplement: Supplemental Material [file supp_gr.275579.121_Supplemental_Table_S2.xlsx]

## Sheet: Supplemental Table 2
Supplemental Table S2: Performance metrics, stratified by SNV and INDEL, on diploid and synthetic polyploid datasets.
Sample	Library	Depth	Filtered	Match	Caller	Stratification	kind	tp	fn	fp	sensitivity	precision	f-measure	ploidy
HG002+HG003+HG004	NovaSeq	10	TRUE	GT	Octopus	genome	SNV	2112737	2262521	1315662	0.482883	0.616246	0.541474	6
HG002+HG003+HG004	NovaSeq	10	TRUE	GT	Octopus	genome	INDEL	259894	311422	220773	0.454904	0.540694	0.494103	6
HG002+HG003+HG004	NovaSeq	10	TRUE	GT	GATK4	genome	SNV	2053270	2323426	1520604	0.469137	0.574522	0.516509	6
HG002+HG003+HG004	NovaSeq	10	TRUE	GT	GATK4	genome	INDEL	226349	346013	201003	0.395465	0.529655	0.452828	6
HG002+HG003+HG004	NovaSeq	10	TRUE	GT	FreeBayes	genome	SNV	1860614	2517203	1383417	0.42501	0.57355	0.488232	6
HG002+HG003+HG004	NovaSeq	10	TRUE	GT	FreeBayes	genome	INDEL	186373	386865	199604	0.325123	0.48286	0.388595	6
HG002+HG003+HG004	NovaSeq	10	TRUE	GT	Octopus	alldifficult	SNV	340260	422043	218380	0.446358	0.609086	0.515177	6
HG002+HG003+HG004	NovaSeq	10	TRUE	GT	Octopus	alldifficult	INDEL	153685	215630	156500	0.416135	0.495462	0.452347	6
HG002+HG003+HG004	NovaSeq	10	TRUE	GT	GATK4	alldifficult	SNV	322390	440087	255157	0.422819	0.558206	0.48117	6
HG002+HG003+HG004	NovaSeq	10	TRUE	GT	GATK4	alldifficult	INDEL	130004	240281	132492	0.351092	0.495261	0.410897	6
HG002+HG003+HG004	NovaSeq	10	TRUE	GT	FreeBayes	alldifficult	SNV	298541	464603	225562	0.391199	0.569623	0.463844	6
HG002+HG003+HG004	NovaSeq	10	TRUE	GT	FreeBayes	alldifficult	INDEL	105859	265285	116212	0.285224	0.47669	0.356899	6
HG002+HG003+HG004	NovaSeq	10	TRUE	GT	Octopus	alllowmapandsegdup	SNV	129781	188553	88541	0.407688	0.594448	0.483666	6
HG002+HG003+HG004	NovaSeq	10	TRUE	GT	Octopus	alllowmapandsegdup	INDEL	7327	10372	5435	0.413978	0.574126	0.481074	6
HG002+HG003+HG004	NovaSeq	10	TRUE	GT	GATK4	alllowmapandsegdup	SNV	114951	203404	100465	0.361078	0.533623	0.430713	6
HG002+HG003+HG004	NovaSeq	10	TRUE	GT	GATK4	alllowmapandsegdup	INDEL	6154	11558	5812	0.347448	0.51429	0.414718	6
HG002+HG003+HG004	NovaSeq	10	TRUE	GT	FreeBayes	alllowmapandsegdup	SNV	112146	206299	89529	0.352168	0.556073	0.431231	6
HG002+HG003+HG004	NovaSeq	10	TRUE	GT	FreeBayes	alllowmapandsegdup	INDEL	5333	12391	9675	0.300891	0.355344	0.325858	6
HG002+HG003+HG004	NovaSeq	10	TRUE	GT	Octopus	notinalldifficult	SNV	1772477	1840478	1097282	0.490589	0.61764	0.546832	6
HG002+HG003+HG004	NovaSeq	10	TRUE	GT	Octopus	notinalldifficult	INDEL	106296	96096	64363	0.525199	0.622856	0.569874	6
HG002+HG003+HG004	NovaSeq	10	TRUE	GT	GATK4	notinalldifficult	SNV	1730880	1883339	1265447	0.478908	0.577667	0.523672	6
HG002+HG003+HG004	NovaSeq	10	TRUE	GT	GATK4	notinalldifficult	INDEL	96450	106018	68699	0.476372	0.584018	0.524731	6
HG002+HG003+HG004	NovaSeq	10	TRUE	GT	FreeBayes	notinalldifficult	SNV	1562073	2052600	1157855	0.432148	0.574307	0.493187	6
HG002+HG003+HG004	NovaSeq	10	TRUE	GT	FreeBayes	notinalldifficult	INDEL	80496	121990	109055	0.397539	0.424667	0.410655	6
HG002+HG003+HG004	NovaSeq	10	TRUE	GT	Octopus	notinalllowmapandsegdup	SNV	1982956	2073968	1227121	0.488783	0.617728	0.545743	6
HG002+HG003+HG004	NovaSeq	10	TRUE	GT	Octopus	notinalllowmapandsegdup	INDEL	252419	300987	215305	0.456119	0.539675	0.494392	6
HG002+HG003+HG004	NovaSeq	10	TRUE	GT	GATK4	notinalllowmapandsegdup	SNV	1938319	2120022	1420139	0.477614	0.577146	0.522683	6
HG002+HG003+HG004	NovaSeq	10	TRUE	GT	GATK4	notinalllowmapandsegdup	INDEL	220065	334374	195145	0.396915	0.530009	0.453907	6
HG002+HG003+HG004	NovaSeq	10	TRUE	GT	FreeBayes	notinalllowmapandsegdup	SNV	1748468	2310904	1293888	0.430724	0.574709	0.492406	6
HG002+HG003+HG004	NovaSeq	10	TRUE	GT	FreeBayes	notinalllowmapandsegdup	INDEL	180923	374380	190438	0.32581	0.487189	0.390482	6
HG002+HG003+HG004	NovaSeq	10	TRUE	GT	Octopus	AllTandemRepeatsandHomopolymers	SNV	88814	107656	55668	0.452049	0.614706	0.520977	6
HG002+HG003+HG004	NovaSeq	10	TRUE	GT	Octopus	AllTandemRepeatsandHomopolymers	INDEL	135788	196162	145077	0.409062	0.483464	0.443161	6
HG002+HG003+HG004	NovaSeq	10	TRUE	GT	GATK4	AllTandemRepeatsandHomopolymers	SNV	88837	107731	67914	0.45194	0.56674	0.502871	6
HG002+HG003+HG004	NovaSeq	10	TRUE	GT	GATK4	AllTandemRepeatsandHomopolymers	INDEL	114185	218726	120018	0.34299	0.487547	0.402688	6
HG002+HG003+HG004	NovaSeq	10	TRUE	GT	FreeBayes	AllTandemRepeatsandHomopolymers	SNV	78968	118108	57644	0.400698	0.578046	0.473304	6
HG002+HG003+HG004	NovaSeq	10	TRUE	GT	FreeBayes	AllTandemRepeatsandHomopolymers	INDEL	92550	241202	98749	0.277302	0.483798	0.352537	6
HG002+HG003+HG004	NovaSeq	10	TRUE	GT	Octopus	notinAllTandemRepeatsandHomopolymers	SNV	2023923	2154865	1259994	0.484333	0.616314	0.54241	6
HG002+HG003+HG004	NovaSeq	10	TRUE	GT	Octopus	notinAllTandemRepeatsandHomopolymers	INDEL	124318	115650	75830	0.518061	0.62113	0.564933	6
HG002+HG003+HG004	NovaSeq	10	TRUE	GT	GATK4	notinAllTandemRepeatsandHomopolymers	SNV	1964433	2215695	1452690	0.469946	0.574879	0.517143	6
HG002+HG003+HG004	NovaSeq	10	TRUE	GT	GATK4	notinAllTandemRepeatsandHomopolymers	INDEL	112371	127683	81235	0.468107	0.580411	0.518245	6
HG002+HG003+HG004	NovaSeq	10	TRUE	GT	FreeBayes	notinAllTandemRepeatsandHomopolymers	SNV	1781646	2399095	1325773	0.426156	0.573352	0.488915	6
HG002+HG003+HG004	NovaSeq	10	TRUE	GT	FreeBayes	notinAllTandemRepeatsandHomopolymers	INDEL	93904	146185	128746	0.391122	0.421756	0.405862	6
HG002+HG003+HG004	NovaSeq	20	TRUE	GT	Octopus	genome	SNV	3002883	1372671	992921	0.686286	0.751509	0.717418	6
HG002+HG003+HG004	NovaSeq	20	TRUE	GT	Octopus	genome	INDEL	374114	195540	180557	0.656739	0.674479	0.665491	6
HG002+HG003+HG004	NovaSeq	20	TRUE	GT	GATK4	genome	SNV	2790808	1585448	1249788	0.637716	0.690692	0.663148	6
HG002+HG003+HG004	NovaSeq	20	TRUE	GT	GATK4	genome	INDEL	326938	244728	182880	0.571904	0.641284	0.60461	6
HG002+HG003+HG004	NovaSeq	20	TRUE	GT	FreeBayes	genome	SNV	2707753	1669946	1274598	0.618533	0.679938	0.647784	6
HG002+HG003+HG004	NovaSeq	20	TRUE	GT	FreeBayes	genome	INDEL	282874	290100	212456	0.493694	0.571082	0.529576	6
HG002+HG003+HG004	NovaSeq	20	TRUE	GT	Octopus	alldifficult	SNV	490047	271818	176630	0.64322	0.735059	0.68608	6
HG002+HG003+HG004	NovaSeq	20	TRUE	GT	Octopus	alldifficult	INDEL	227197	140406	131804	0.61805	0.632859	0.625367	6
HG002+HG003+HG004	NovaSeq	20	TRUE	GT	GATK4	alldifficult	SNV	442335	319820	222338	0.580374	0.665493	0.620026	6
HG002+HG003+HG004	NovaSeq	20	TRUE	GT	GATK4	alldifficult	INDEL	195008	174588	125860	0.527625	0.607751	0.564861	6
HG002+HG003+HG004	NovaSeq	20	TRUE	GT	FreeBayes	alldifficult	SNV	438075	324966	216051	0.574117	0.66971	0.61824	6
HG002+HG003+HG004	NovaSeq	20	TRUE	GT	FreeBayes	alldifficult	INDEL	166276	204610	128555	0.448321	0.563971	0.49954	6
HG002+HG003+HG004	NovaSeq	20	TRUE	GT	Octopus	alllowmapandsegdup	SNV	188089	130236	78757	0.590871	0.70486	0.642851	6
HG002+HG003+HG004	NovaSeq	20	TRUE	GT	Octopus	alllowmapandsegdup	INDEL	10670	7018	4872	0.603234	0.686527	0.642191	6
HG002+HG003+HG004	NovaSeq	20	TRUE	GT	GATK4	alllowmapandsegdup	SNV	158345	159994	94236	0.49741	0.626908	0.554701	6
HG002+HG003+HG004	NovaSeq	20	TRUE	GT	GATK4	alllowmapandsegdup	INDEL	8855	8852	5595	0.500085	0.612803	0.550735	6
HG002+HG003+HG004	NovaSeq	20	TRUE	GT	FreeBayes	alllowmapandsegdup	SNV	166502	151962	92039	0.522828	0.644006	0.577125	6
HG002+HG003+HG004	NovaSeq	20	TRUE	GT	FreeBayes	alllowmapandsegdup	INDEL	8171	9556	11076	0.460935	0.424534	0.441986	6
HG002+HG003+HG004	NovaSeq	20	TRUE	GT	Octopus	notinalldifficult	SNV	2512836	1100853	816291	0.695366	0.754803	0.723867	6
HG002+HG003+HG004	NovaSeq	20	TRUE	GT	Octopus	notinalldifficult	INDEL	147152	55290	48883	0.726885	0.750641	0.738572	6
HG002+HG003+HG004	NovaSeq	20	TRUE	GT	GATK4	notinalldifficult	SNV	2348473	1265628	1027450	0.649808	0.695654	0.67195	6
HG002+HG003+HG004	NovaSeq	20	TRUE	GT	GATK4	notinalldifficult	INDEL	132143	70318	57167	0.652684	0.698024	0.674593	6
HG002+HG003+HG004	NovaSeq	20	TRUE	GT	FreeBayes	notinalldifficult	SNV	2269678	1344980	1058547	0.627909	0.681948	0.653814	6
HG002+HG003+HG004	NovaSeq	20	TRUE	GT	FreeBayes	notinalldifficult	INDEL	116738	85743	110742	0.576538	0.513179	0.543017	6
HG002+HG003+HG004	NovaSeq	20	TRUE	GT	Octopus	notinalllowmapandsegdup	SNV	2814794	1242435	914164	0.693773	0.754847	0.723022	6
HG002+HG003+HG004	NovaSeq	20	TRUE	GT	Octopus	notinalllowmapandsegdup	INDEL	363282	188474	175672	0.658411	0.67405	0.666139	6
HG002+HG003+HG004	NovaSeq	20	TRUE	GT	GATK4	notinalllowmapandsegdup	SNV	2632463	1425454	1155552	0.648723	0.694945	0.671039	6
HG002+HG003+HG004	NovaSeq	20	TRUE	GT	GATK4	notinalllowmapandsegdup	INDEL	317938	235810	177231	0.574156	0.64208	0.606221	6
HG002+HG003+HG004	NovaSeq	20	TRUE	GT	FreeBayes	notinalllowmapandsegdup	SNV	2541251	1517984	1182559	0.626042	0.682433	0.653022	6
HG002+HG003+HG004	NovaSeq	20	TRUE	GT	FreeBayes	notinalllowmapandsegdup	INDEL	274561	280475	201945	0.494672	0.576196	0.532331	6
HG002+HG003+HG004	NovaSeq	20	TRUE	GT	Octopus	AllTandemRepeatsandHomopolymers	SNV	129213	66857	42886	0.659015	0.750806	0.701922	6
HG002+HG003+HG004	NovaSeq	20	TRUE	GT	Octopus	AllTandemRepeatsandHomopolymers	INDEL	201868	128377	122515	0.611267	0.622314	0.616741	6
HG002+HG003+HG004	NovaSeq	20	TRUE	GT	GATK4	AllTandemRepeatsandHomopolymers	SNV	123094	73201	57339	0.627087	0.682214	0.65349	6
HG002+HG003+HG004	NovaSeq	20	TRUE	GT	GATK4	AllTandemRepeatsandHomopolymers	INDEL	172929	159303	114695	0.520507	0.601233	0.557965	6
HG002+HG003+HG004	NovaSeq	20	TRUE	GT	FreeBayes	AllTandemRepeatsandHomopolymers	SNV	116152	80821	53044	0.589685	0.686494	0.634417	6
HG002+HG003+HG004	NovaSeq	20	TRUE	GT	FreeBayes	AllTandemRepeatsandHomopolymers	INDEL	146507	186994	109462	0.4393	0.572362	0.49708	6
HG002+HG003+HG004	NovaSeq	20	TRUE	GT	Octopus	notinAllTandemRepeatsandHomopolymers	SNV	2873670	1305814	950035	0.687566	0.751541	0.718131	6
HG002+HG003+HG004	NovaSeq	20	TRUE	GT	Octopus	notinAllTandemRepeatsandHomopolymers	INDEL	172625	67385	58198	0.719241	0.747867	0.733275	6
HG002+HG003+HG004	NovaSeq	20	TRUE	GT	GATK4	notinAllTandemRepeatsandHomopolymers	SNV	2667714	1512247	1192449	0.638215	0.691088	0.6636	6
HG002+HG003+HG004	NovaSeq	20	TRUE	GT	GATK4	notinAllTandemRepeatsandHomopolymers	INDEL	154353	85682	68385	0.643044	0.69298	0.667079	6
HG002+HG003+HG004	NovaSeq	20	TRUE	GT	FreeBayes	notinAllTandemRepeatsandHomopolymers	SNV	2591601	1589125	1221554	0.619893	0.679647	0.648396	6
HG002+HG003+HG004	NovaSeq	20	TRUE	GT	FreeBayes	notinAllTandemRepeatsandHomopolymers	INDEL	136636	103440	132086	0.569136	0.508466	0.537093	6
HG002+HG003+HG004	NovaSeq	30	TRUE	GT	Octopus	genome	SNV	3501681	873453	734966	0.80036	0.826522	0.81323	6
HG002+HG003+HG004	NovaSeq	30	TRUE	GT	Octopus	genome	INDEL	433201	135561	138855	0.761656	0.75727	0.759457	6
HG002+HG003+HG004	NovaSeq	30	TRUE	GT	GATK4	genome	SNV	3168368	1207641	994488	0.724031	0.761104	0.742105	6
HG002+HG003+HG004	NovaSeq	30	TRUE	GT	GATK4	genome	INDEL	382212	189143	151827	0.668957	0.715701	0.69154	6
HG002+HG003+HG004	NovaSeq	30	TRUE	GT	FreeBayes	genome	SNV	3153831	1223809	980554	0.720441	0.76283	0.74103	6
HG002+HG003+HG004	NovaSeq	30	TRUE	GT	FreeBayes	genome	INDEL	339552	233277	181251	0.592763	0.651978	0.620962	6
HG002+HG003+HG004	NovaSeq	30	TRUE	GT	Octopus	alldifficult	SNV	573836	187830	142107	0.753396	0.801511	0.776709	6
HG002+HG003+HG004	NovaSeq	30	TRUE	GT	Octopus	alldifficult	INDEL	267205	99520	103517	0.728625	0.720769	0.724676	6
HG002+HG003+HG004	NovaSeq	30	TRUE	GT	GATK4	alldifficult	SNV	503396	258608	183667	0.660621	0.732678	0.694786	6
HG002+HG003+HG004	NovaSeq	30	TRUE	GT	GATK4	alldifficult	INDEL	233219	136071	106380	0.631533	0.686748	0.657985	6
HG002+HG003+HG004	NovaSeq	30	TRUE	GT	FreeBayes	alldifficult	SNV	512433	250560	177221	0.671609	0.743029	0.705516	6
HG002+HG003+HG004	NovaSeq	30	TRUE	GT	FreeBayes	alldifficult	INDEL	202920	167819	113142	0.547339	0.642026	0.590914	6
HG002+HG003+HG004	NovaSeq	30	TRUE	GT	Octopus	alllowmapandsegdup	SNV	221147	97142	69950	0.694799	0.759702	0.725803	6
HG002+HG003+HG004	NovaSeq	30	TRUE	GT	Octopus	alllowmapandsegdup	INDEL	12340	5335	4234	0.698161	0.74454	0.720605	6
HG002+HG003+HG004	NovaSeq	30	TRUE	GT	GATK4	alllowmapandsegdup	SNV	180366	137944	81264	0.566636	0.689393	0.622016	6
HG002+HG003+HG004	NovaSeq	30	TRUE	GT	GATK4	alllowmapandsegdup	INDEL	10026	7675	5015	0.566409	0.666578	0.612424	6
HG002+HG003+HG004	NovaSeq	30	TRUE	GT	FreeBayes	alllowmapandsegdup	SNV	195489	122978	81132	0.613844	0.706703	0.657009	6
HG002+HG003+HG004	NovaSeq	30	TRUE	GT	FreeBayes	alllowmapandsegdup	INDEL	9789	7934	10491	0.552333	0.482692	0.51517	6
HG002+HG003+HG004	NovaSeq	30	TRUE	GT	Octopus	notinalldifficult	SNV	2927845	685623	592859	0.810259	0.831608	0.820795	6
HG002+HG003+HG004	NovaSeq	30	TRUE	GT	Octopus	notinalldifficult	INDEL	166288	36141	35480	0.821463	0.824154	0.822807	6
HG002+HG003+HG004	NovaSeq	30	TRUE	GT	GATK4	notinalldifficult	SNV	2664972	949033	810821	0.737401	0.766723	0.751777	6
HG002+HG003+HG004	NovaSeq	30	TRUE	GT	GATK4	notinalldifficult	INDEL	149218	53238	45576	0.737039	0.76603	0.751255	6
HG002+HG003+HG004	NovaSeq	30	TRUE	GT	FreeBayes	notinalldifficult	SNV	2641398	973249	803333	0.730749	0.766794	0.748337	6
HG002+HG003+HG004	NovaSeq	30	TRUE	GT	FreeBayes	notinalldifficult	INDEL	136834	65649	90257	0.67578	0.602551	0.637068	6
HG002+HG003+HG004	NovaSeq	30	TRUE	GT	Octopus	notinalllowmapandsegdup	SNV	3280534	776311	665016	0.808642	0.831452	0.819888	6
HG002+HG003+HG004	NovaSeq	30	TRUE	GT	Octopus	notinalllowmapandsegdup	INDEL	420688	130187	134634	0.763672	0.757557	0.760602	6
HG002+HG003+HG004	NovaSeq	30	TRUE	GT	GATK4	notinalllowmapandsegdup	SNV	2988002	1069697	913224	0.736378	0.765914	0.750856	6
HG002+HG003+HG004	NovaSeq	30	TRUE	GT	GATK4	notinalllowmapandsegdup	INDEL	372017	181425	146774	0.672188	0.717085	0.693911	6
HG002+HG003+HG004	NovaSeq	30	TRUE	GT	FreeBayes	notinalllowmapandsegdup	SNV	2958342	1100831	899422	0.728804	0.766854	0.747345	6
HG002+HG003+HG004	NovaSeq	30	TRUE	GT	FreeBayes	notinalllowmapandsegdup	INDEL	329614	225281	171265	0.594011	0.658071	0.624403	6
HG002+HG003+HG004	NovaSeq	30	TRUE	GT	Octopus	AllTandemRepeatsandHomopolymers	SNV	152212	43685	31995	0.777	0.82631	0.800897	6
HG002+HG003+HG004	NovaSeq	30	TRUE	GT	Octopus	AllTandemRepeatsandHomopolymers	INDEL	238421	90949	96151	0.72387	0.712615	0.718198	6
HG002+HG003+HG004	NovaSeq	30	TRUE	GT	GATK4	AllTandemRepeatsandHomopolymers	SNV	140701	55472	46060	0.717229	0.753375	0.734858	6
HG002+HG003+HG004	NovaSeq	30	TRUE	GT	GATK4	AllTandemRepeatsandHomopolymers	INDEL	208259	123672	96969	0.627417	0.682306	0.653711	6
HG002+HG003+HG004	NovaSeq	30	TRUE	GT	FreeBayes	AllTandemRepeatsandHomopolymers	SNV	136268	60665	41336	0.691951	0.767257	0.727661	6
HG002+HG003+HG004	NovaSeq	30	TRUE	GT	FreeBayes	AllTandemRepeatsandHomopolymers	INDEL	179678	153677	95867	0.538999	0.652082	0.590172	6
HG002+HG003+HG004	NovaSeq	30	TRUE	GT	Octopus	notinAllTandemRepeatsandHomopolymers	SNV	3349469	829768	702971	0.801455	0.826531	0.8138	6
HG002+HG003+HG004	NovaSeq	30	TRUE	GT	Octopus	notinAllTandemRepeatsandHomopolymers	INDEL	195226	44768	42866	0.813462	0.81996	0.816698	6
HG002+HG003+HG004	NovaSeq	30	TRUE	GT	GATK4	notinAllTandemRepeatsandHomopolymers	SNV	3027667	1152169	948428	0.724351	0.761467	0.742445	6
HG002+HG003+HG004	NovaSeq	30	TRUE	GT	GATK4	notinAllTandemRepeatsandHomopolymers	INDEL	174335	65690	55019	0.72632	0.760113	0.742833	6
HG002+HG003+HG004	NovaSeq	30	TRUE	GT	FreeBayes	notinAllTandemRepeatsandHomopolymers	SNV	3017563	1163144	939218	0.721783	0.762631	0.741645	6
HG002+HG003+HG004	NovaSeq	30	TRUE	GT	FreeBayes	notinAllTandemRepeatsandHomopolymers	INDEL	160220	79859	109410	0.667364	0.594222	0.628672	6
HG002+HG003+HG004	NovaSeq	40	TRUE	GT	Octopus	genome	SNV	3769021	605930	551168	0.8615	0.87242	0.866926	6
HG002+HG003+HG004	NovaSeq	40	TRUE	GT	Octopus	genome	INDEL	468071	100215	107850	0.823654	0.812735	0.818158	6
HG002+HG003+HG004	NovaSeq	40	TRUE	GT	GATK4	genome	SNV	3413429	962463	804332	0.780053	0.809299	0.794407	6
HG002+HG003+HG004	NovaSeq	40	TRUE	GT	GATK4	genome	INDEL	417375	153860	125579	0.730654	0.768712	0.7492	6
HG002+HG003+HG004	NovaSeq	40	TRUE	GT	FreeBayes	genome	SNV	3442418	935165	790759	0.786374	0.8132	0.799562	6
HG002+HG003+HG004	NovaSeq	40	TRUE	GT	FreeBayes	genome	INDEL	380804	191930	156442	0.664888	0.708808	0.686146	6
HG002+HG003+HG004	NovaSeq	40	TRUE	GT	Octopus	alldifficult	SNV	619011	142559	117771	0.812809	0.840155	0.826256	6
HG002+HG003+HG004	NovaSeq	40	TRUE	GT	Octopus	alldifficult	INDEL	291665	74594	81921	0.796335	0.780717	0.788449	6
HG002+HG003+HG004	NovaSeq	40	TRUE	GT	GATK4	alldifficult	SNV	541323	220597	155154	0.710472	0.77723	0.742353	6
HG002+HG003+HG004	NovaSeq	40	TRUE	GT	GATK4	alldifficult	INDEL	257136	112035	89007	0.696523	0.742861	0.718946	6
HG002+HG003+HG004	NovaSeq	40	TRUE	GT	FreeBayes	alldifficult	SNV	561032	201907	150748	0.735356	0.78821	0.760866	6
HG002+HG003+HG004	NovaSeq	40	TRUE	GT	FreeBayes	alldifficult	INDEL	230566	140081	100033	0.622064	0.697419	0.657589	6
HG002+HG003+HG004	NovaSeq	40	TRUE	GT	Octopus	alllowmapandsegdup	SNV	239277	78987	63602	0.751819	0.790009	0.770441	6
HG002+HG003+HG004	NovaSeq	40	TRUE	GT	Octopus	alllowmapandsegdup	INDEL	13304	4366	3793	0.752915	0.778148	0.765323	6
HG002+HG003+HG004	NovaSeq	40	TRUE	GT	GATK4	alllowmapandsegdup	SNV	193595	124697	71493	0.608231	0.730305	0.663701	6
HG002+HG003+HG004	NovaSeq	40	TRUE	GT	GATK4	alllowmapandsegdup	INDEL	10933	6767	4269	0.617684	0.719182	0.66458	6
HG002+HG003+HG004	NovaSeq	40	TRUE	GT	FreeBayes	alllowmapandsegdup	SNV	214109	104349	73390	0.67233	0.74473	0.706681	6
HG002+HG003+HG004	NovaSeq	40	TRUE	GT	FreeBayes	alllowmapandsegdup	INDEL	10921	6806	10045	0.616066	0.520891	0.564495	6
HG002+HG003+HG004	NovaSeq	40	TRUE	GT	Octopus	notinalldifficult	SNV	3150010	463371	433397	0.871762	0.879054	0.875393	6
HG002+HG003+HG004	NovaSeq	40	TRUE	GT	Octopus	notinalldifficult	INDEL	176708	25711	26087	0.872981	0.871363	0.872171	6
HG002+HG003+HG004	NovaSeq	40	TRUE	GT	GATK4	notinalldifficult	SNV	2872106	741866	649178	0.794723	0.815642	0.805046	6
HG002+HG003+HG004	NovaSeq	40	TRUE	GT	GATK4	notinalldifficult	INDEL	160504	41951	36681	0.792789	0.813977	0.803243	6
HG002+HG003+HG004	NovaSeq	40	TRUE	GT	FreeBayes	notinalldifficult	SNV	2881386	733258	640011	0.797142	0.818251	0.807559	6
HG002+HG003+HG004	NovaSeq	40	TRUE	GT	FreeBayes	notinalldifficult	INDEL	150481	52000	74599	0.743186	0.668567	0.703904	6
HG002+HG003+HG004	NovaSeq	40	TRUE	GT	Octopus	notinalllowmapandsegdup	SNV	3529744	526943	487566	0.870105	0.878634	0.874349	6
HG002+HG003+HG004	NovaSeq	40	TRUE	GT	Octopus	notinalllowmapandsegdup	INDEL	454571	95833	104102	0.825886	0.813662	0.819728	6
HG002+HG003+HG004	NovaSeq	40	TRUE	GT	GATK4	notinalllowmapandsegdup	SNV	3219834	837766	732839	0.793532	0.814597	0.803926	6
HG002+HG003+HG004	NovaSeq	40	TRUE	GT	GATK4	notinalllowmapandsegdup	INDEL	406271	147052	121274	0.734238	0.770116	0.75175	6
HG002+HG003+HG004	NovaSeq	40	TRUE	GT	FreeBayes	notinalllowmapandsegdup	SNV	3228309	830816	717369	0.795321	0.818189	0.806593	6
HG002+HG003+HG004	NovaSeq	40	TRUE	GT	FreeBayes	notinalllowmapandsegdup	INDEL	369731	185065	146847	0.666427	0.715731	0.6902	6
HG002+HG003+HG004	NovaSeq	40	TRUE	GT	Octopus	AllTandemRepeatsandHomopolymers	SNV	164516	31312	24436	0.840105	0.870676	0.855117	6
HG002+HG003+HG004	NovaSeq	40	TRUE	GT	Octopus	AllTandemRepeatsandHomopolymers	INDEL	260942	67957	75849	0.79338	0.774789	0.783975	6
HG002+HG003+HG004	NovaSeq	40	TRUE	GT	GATK4	AllTandemRepeatsandHomopolymers	SNV	151826	44292	37634	0.774156	0.801362	0.787524	6
HG002+HG003+HG004	NovaSeq	40	TRUE	GT	GATK4	AllTandemRepeatsandHomopolymers	INDEL	230282	101531	81076	0.694011	0.739605	0.716083	6
HG002+HG003+HG004	NovaSeq	40	TRUE	GT	FreeBayes	AllTandemRepeatsandHomopolymers	SNV	150327	46557	33560	0.763531	0.817497	0.789593	6
HG002+HG003+HG004	NovaSeq	40	TRUE	GT	FreeBayes	AllTandemRepeatsandHomopolymers	INDEL	204818	128445	84201	0.614584	0.708666	0.65828	6
HG002+HG003+HG004	NovaSeq	40	TRUE	GT	Octopus	notinAllTandemRepeatsandHomopolymers	SNV	3604505	574618	526732	0.862503	0.8725	0.867473	6
HG002+HG003+HG004	NovaSeq	40	TRUE	GT	Octopus	notinAllTandemRepeatsandHomopolymers	INDEL	207603	32386	32156	0.865052	0.865882	0.865467	6
HG002+HG003+HG004	NovaSeq	40	TRUE	GT	GATK4	notinAllTandemRepeatsandHomopolymers	SNV	3261603	918171	766698	0.78033	0.809672	0.79473	6
HG002+HG003+HG004	NovaSeq	40	TRUE	GT	GATK4	notinAllTandemRepeatsandHomopolymers	INDEL	187514	52509	44652	0.781233	0.807672	0.794233	6
HG002+HG003+HG004	NovaSeq	40	TRUE	GT	FreeBayes	notinAllTandemRepeatsandHomopolymers	SNV	3292091	888608	757199	0.78745	0.813005	0.800023	6
HG002+HG003+HG004	NovaSeq	40	TRUE	GT	FreeBayes	notinAllTandemRepeatsandHomopolymers	INDEL	176381	63696	91987	0.734685	0.657236	0.693806	6
HG002+HG003+HG004	NovaSeq	50	TRUE	GT	Octopus	genome	SNV	3923888	450883	426657	0.896936	0.90193	0.899426	6
HG002+HG003+HG004	NovaSeq	50	TRUE	GT	Octopus	genome	INDEL	490212	77770	86160	0.863077	0.850513	0.856749	6
HG002+HG003+HG004	NovaSeq	50	TRUE	GT	GATK4	genome	SNV	3591471	784384	658342	0.820747	0.845089	0.83274	6
HG002+HG003+HG004	NovaSeq	50	TRUE	GT	GATK4	genome	INDEL	442299	128827	105298	0.774433	0.807709	0.790721	6
HG002+HG003+HG004	NovaSeq	50	TRUE	GT	FreeBayes	genome	SNV	3626324	751168	661404	0.828402	0.845745	0.836984	6
HG002+HG003+HG004	NovaSeq	50	TRUE	GT	FreeBayes	genome	INDEL	410330	162319	138685	0.716547	0.747393	0.731645	6
HG002+HG003+HG004	NovaSeq	50	TRUE	GT	Octopus	alldifficult	SNV	645385	116108	101080	0.847526	0.864588	0.855972	6
HG002+HG003+HG004	NovaSeq	50	TRUE	GT	Octopus	alldifficult	INDEL	307217	58742	66703	0.839485	0.821612	0.830452	6
HG002+HG003+HG004	NovaSeq	50	TRUE	GT	GATK4	alldifficult	SNV	569369	192503	132675	0.747329	0.811016	0.777871	6
HG002+HG003+HG004	NovaSeq	50	TRUE	GT	GATK4	alldifficult	INDEL	273796	95267	75537	0.741868	0.783768	0.762243	6
HG002+HG003+HG004	NovaSeq	50	TRUE	GT	FreeBayes	alldifficult	SNV	592078	170804	133031	0.776107	0.816537	0.795809	6
HG002+HG003+HG004	NovaSeq	50	TRUE	GT	FreeBayes	alldifficult	INDEL	251228	119336	90380	0.677961	0.735428	0.705526	6
HG002+HG003+HG004	NovaSeq	50	TRUE	GT	Octopus	alllowmapandsegdup	SNV	249584	68691	59411	0.784177	0.807728	0.795779	6
HG002+HG003+HG004	NovaSeq	50	TRUE	GT	Octopus	alllowmapandsegdup	INDEL	13857	3813	3478	0.784211	0.799365	0.791715	6
HG002+HG003+HG004	NovaSeq	50	TRUE	GT	GATK4	alllowmapandsegdup	SNV	203403	114898	64072	0.639027	0.760456	0.694474	6
HG002+HG003+HG004	NovaSeq	50	TRUE	GT	GATK4	alllowmapandsegdup	INDEL	11476	6226	3905	0.648288	0.746115	0.69377	6
HG002+HG003+HG004	NovaSeq	50	TRUE	GT	FreeBayes	alllowmapandsegdup	SNV	226147	92302	68178	0.710151	0.768358	0.738109	6
HG002+HG003+HG004	NovaSeq	50	TRUE	GT	FreeBayes	alllowmapandsegdup	INDEL	11597	6126	9670	0.654347	0.545305	0.59487	6
HG002+HG003+HG004	NovaSeq	50	TRUE	GT	Octopus	notinalldifficult	SNV	3278503	334775	325577	0.907349	0.909664	0.908505	6
HG002+HG003+HG004	NovaSeq	50	TRUE	GT	Octopus	notinalldifficult	INDEL	183328	19087	19595	0.905704	0.903436	0.904569	6
HG002+HG003+HG004	NovaSeq	50	TRUE	GT	GATK4	notinalldifficult	SNV	3022102	591881	525667	0.836225	0.851832	0.843956	6
HG002+HG003+HG004	NovaSeq	50	TRUE	GT	GATK4	notinalldifficult	INDEL	168809	33645	29824	0.833814	0.849854	0.841758	6
HG002+HG003+HG004	NovaSeq	50	TRUE	GT	FreeBayes	notinalldifficult	SNV	3034246	580364	528373	0.839439	0.85169	0.84552	6
HG002+HG003+HG004	NovaSeq	50	TRUE	GT	FreeBayes	notinalldifficult	INDEL	159388	43090	63764	0.787187	0.714258	0.748951	6
HG002+HG003+HG004	NovaSeq	50	TRUE	GT	Octopus	notinalllowmapandsegdup	SNV	3674304	382192	367246	0.905783	0.909132	0.907454	6
HG002+HG003+HG004	NovaSeq	50	TRUE	GT	Octopus	notinalllowmapandsegdup	INDEL	476161	73939	82729	0.86559	0.851976	0.858729	6
HG002+HG003+HG004	NovaSeq	50	TRUE	GT	GATK4	notinalllowmapandsegdup	SNV	3388068	669486	594270	0.835003	0.850774	0.842814	6
HG002+HG003+HG004	NovaSeq	50	TRUE	GT	GATK4	notinalllowmapandsegdup	INDEL	430650	122563	101354	0.778452	0.809486	0.793666	6
HG002+HG003+HG004	NovaSeq	50	TRUE	GT	FreeBayes	notinalllowmapandsegdup	SNV	3400177	658866	593226	0.837679	0.851449	0.844508	6
HG002+HG003+HG004	NovaSeq	50	TRUE	GT	FreeBayes	notinalllowmapandsegdup	INDEL	398577	156138	129422	0.718526	0.754882	0.736255	6
HG002+HG003+HG004	NovaSeq	50	TRUE	GT	Octopus	AllTandemRepeatsandHomopolymers	SNV	172042	23732	19023	0.878779	0.900437	0.889476	6
HG002+HG003+HG004	NovaSeq	50	TRUE	GT	Octopus	AllTandemRepeatsandHomopolymers	INDEL	275274	53333	61602	0.8377	0.817137	0.827291	6
HG002+HG003+HG004	NovaSeq	50	TRUE	GT	GATK4	AllTandemRepeatsandHomopolymers	SNV	160071	36000	30813	0.816393	0.838577	0.827337	6
HG002+HG003+HG004	NovaSeq	50	TRUE	GT	GATK4	AllTandemRepeatsandHomopolymers	INDEL	245583	86121	68640	0.740368	0.781556	0.760405	6
HG002+HG003+HG004	NovaSeq	50	TRUE	GT	FreeBayes	AllTandemRepeatsandHomopolymers	SNV	159165	37685	28366	0.80856	0.84874	0.828163	6
HG002+HG003+HG004	NovaSeq	50	TRUE	GT	FreeBayes	AllTandemRepeatsandHomopolymers	INDEL	223934	109246	75597	0.672111	0.747615	0.707856	6
HG002+HG003+HG004	NovaSeq	50	TRUE	GT	Octopus	notinAllTandemRepeatsandHomopolymers	SNV	3751846	427151	407634	0.897786	0.901999	0.899888	6
HG002+HG003+HG004	NovaSeq	50	TRUE	GT	Octopus	notinAllTandemRepeatsandHomopolymers	INDEL	215452	24525	24692	0.897803	0.897178	0.89749	6
HG002+HG003+HG004	NovaSeq	50	TRUE	GT	GATK4	notinAllTandemRepeatsandHomopolymers	SNV	3431400	748384	627529	0.820952	0.845395	0.832994	6
HG002+HG003+HG004	NovaSeq	50	TRUE	GT	GATK4	notinAllTandemRepeatsandHomopolymers	INDEL	197198	42825	36750	0.82158	0.842914	0.83211	6
HG002+HG003+HG004	NovaSeq	50	TRUE	GT	FreeBayes	notinAllTandemRepeatsandHomopolymers	SNV	3467159	713483	633038	0.829336	0.845608	0.837393	6
HG002+HG003+HG004	NovaSeq	50	TRUE	GT	FreeBayes	notinAllTandemRepeatsandHomopolymers	INDEL	186845	53228	79847	0.778284	0.700602	0.737403	6
HG002+HG003+HG004	NovaSeq	60	TRUE	GT	Octopus	genome	SNV	4022106	352331	340931	0.919457	0.921859	0.920656	6
HG002+HG003+HG004	NovaSeq	60	TRUE	GT	Octopus	genome	INDEL	505370	62381	70583	0.890126	0.87745	0.883743	6
HG002+HG003+HG004	NovaSeq	60	TRUE	GT	GATK4	genome	SNV	3723202	652595	547765	0.850863	0.871747	0.861178	6
HG002+HG003+HG004	NovaSeq	60	TRUE	GT	GATK4	genome	INDEL	460475	110624	89974	0.806296	0.836544	0.821142	6
HG002+HG003+HG004	NovaSeq	60	TRUE	GT	FreeBayes	genome	SNV	3755249	622234	559943	0.857856	0.870239	0.864003	6
HG002+HG003+HG004	NovaSeq	60	TRUE	GT	FreeBayes	genome	INDEL	430993	141582	125408	0.752728	0.774609	0.763511	6
HG002+HG003+HG004	NovaSeq	60	TRUE	GT	Octopus	alldifficult	SNV	662028	99384	89765	0.869474	0.880599	0.875001	6
HG002+HG003+HG004	NovaSeq	60	TRUE	GT	Octopus	alldifficult	INDEL	317929	47817	55487	0.869262	0.851407	0.860242	6
HG002+HG003+HG004	NovaSeq	60	TRUE	GT	GATK4	alldifficult	SNV	590355	171479	115106	0.774913	0.836836	0.804685	6
HG002+HG003+HG004	NovaSeq	60	TRUE	GT	GATK4	alldifficult	INDEL	286179	82855	65124	0.775481	0.814622	0.79457	6
HG002+HG003+HG004	NovaSeq	60	TRUE	GT	FreeBayes	alldifficult	SNV	613692	149178	118836	0.804452	0.837773	0.820774	6
HG002+HG003+HG004	NovaSeq	60	TRUE	GT	FreeBayes	alldifficult	INDEL	265873	104616	82823	0.717627	0.762478	0.739373	6
HG002+HG003+HG004	NovaSeq	60	TRUE	GT	Octopus	alllowmapandsegdup	SNV	256066	62166	56843	0.804652	0.81834	0.811438	6
HG002+HG003+HG004	NovaSeq	60	TRUE	GT	Octopus	alllowmapandsegdup	INDEL	14208	3459	3334	0.804211	0.809942	0.807066	6
HG002+HG003+HG004	NovaSeq	60	TRUE	GT	GATK4	alllowmapandsegdup	SNV	210843	107445	58009	0.662428	0.784234	0.718203	6
HG002+HG003+HG004	NovaSeq	60	TRUE	GT	GATK4	alllowmapandsegdup	INDEL	11874	5826	3585	0.670847	0.768096	0.716186	6
HG002+HG003+HG004	NovaSeq	60	TRUE	GT	FreeBayes	alllowmapandsegdup	SNV	234258	84182	63860	0.735643	0.78579	0.75989	6
HG002+HG003+HG004	NovaSeq	60	TRUE	GT	FreeBayes	alllowmapandsegdup	INDEL	12001	5721	9451	0.677181	0.559435	0.612702	6
HG002+HG003+HG004	NovaSeq	60	TRUE	GT	Octopus	notinalldifficult	SNV	3360078	252947	251166	0.92999	0.930449	0.93022	6
HG002+HG003+HG004	NovaSeq	60	TRUE	GT	Octopus	notinalldifficult	INDEL	187790	14606	15199	0.927835	0.925124	0.926477	6
HG002+HG003+HG004	NovaSeq	60	TRUE	GT	GATK4	notinalldifficult	SNV	3132847	481116	432659	0.866873	0.878654	0.872724	6
HG002+HG003+HG004	NovaSeq	60	TRUE	GT	GATK4	notinalldifficult	INDEL	174598	27858	24925	0.8624	0.875077	0.868692	6
HG002+HG003+HG004	NovaSeq	60	TRUE	GT	FreeBayes	notinalldifficult	SNV	3141557	473056	441107	0.869127	0.876877	0.872985	6
HG002+HG003+HG004	NovaSeq	60	TRUE	GT	FreeBayes	notinalldifficult	INDEL	165438	37042	55937	0.817058	0.74732	0.780635	6
HG002+HG003+HG004	NovaSeq	60	TRUE	GT	Octopus	notinalllowmapandsegdup	SNV	3766040	290165	284088	0.928464	0.929857	0.92916	6
HG002+HG003+HG004	NovaSeq	60	TRUE	GT	Octopus	notinalllowmapandsegdup	INDEL	490968	58904	67301	0.892877	0.879447	0.886111	6
HG002+HG003+HG004	NovaSeq	60	TRUE	GT	GATK4	notinalllowmapandsegdup	SNV	3512359	545150	489756	0.865644	0.877626	0.871594	6
HG002+HG003+HG004	NovaSeq	60	TRUE	GT	GATK4	notinalllowmapandsegdup	INDEL	448428	104760	86355	0.810625	0.838523	0.824338	6
HG002+HG003+HG004	NovaSeq	60	TRUE	GT	FreeBayes	notinalllowmapandsegdup	SNV	3520991	538052	496083	0.867444	0.876506	0.871951	6
HG002+HG003+HG004	NovaSeq	60	TRUE	GT	FreeBayes	notinalllowmapandsegdup	INDEL	418833	135809	116324	0.755141	0.782636	0.768643	6
HG002+HG003+HG004	NovaSeq	60	TRUE	GT	Octopus	AllTandemRepeatsandHomopolymers	SNV	176817	18925	15254	0.903317	0.920581	0.911867	6
HG002+HG003+HG004	NovaSeq	60	TRUE	GT	Octopus	AllTandemRepeatsandHomopolymers	INDEL	285216	43182	50971	0.868507	0.848385	0.858328	6
HG002+HG003+HG004	NovaSeq	60	TRUE	GT	GATK4	AllTandemRepeatsandHomopolymers	SNV	166257	29807	25625	0.847973	0.866454	0.857114	6
HG002+HG003+HG004	NovaSeq	60	TRUE	GT	GATK4	AllTandemRepeatsandHomopolymers	INDEL	256911	74767	59128	0.77458	0.812909	0.793282	6
HG002+HG003+HG004	NovaSeq	60	TRUE	GT	FreeBayes	AllTandemRepeatsandHomopolymers	SNV	165346	31502	24245	0.839968	0.872119	0.855742	6
HG002+HG003+HG004	NovaSeq	60	TRUE	GT	FreeBayes	AllTandemRepeatsandHomopolymers	INDEL	237509	95600	68847	0.713007	0.775271	0.742837	6
HG002+HG003+HG004	NovaSeq	60	TRUE	GT	Octopus	notinAllTandemRepeatsandHomopolymers	SNV	3845289	333406	325677	0.920213	0.921918	0.921065	6
HG002+HG003+HG004	NovaSeq	60	TRUE	GT	Octopus	notinAllTandemRepeatsandHomopolymers	INDEL	220695	19259	19700	0.919739	0.918052	0.918894	6
HG002+HG003+HG004	NovaSeq	60	TRUE	GT	GATK4	notinAllTandemRepeatsandHomopolymers	SNV	3556945	622788	522140	0.850998	0.871996	0.861369	6
HG002+HG003+HG004	NovaSeq	60	TRUE	GT	GATK4	notinAllTandemRepeatsandHomopolymers	INDEL	204040	35982	30947	0.850089	0.868303	0.8591	6
HG002+HG003+HG004	NovaSeq	60	TRUE	GT	FreeBayes	notinAllTandemRepeatsandHomopolymers	SNV	3589903	590732	535698	0.858698	0.870153	0.864387	6
HG002+HG003+HG004	NovaSeq	60	TRUE	GT	FreeBayes	notinAllTandemRepeatsandHomopolymers	INDEL	193951	46120	71044	0.80789	0.731904	0.768022	6
HG002+HG003+HG004	NovaSeq	70	TRUE	GT	Octopus	genome	SNV	4090730	283853	278874	0.935113	0.936179	0.935646	6
HG002+HG003+HG004	NovaSeq	70	TRUE	GT	Octopus	genome	INDEL	516270	51410	59186	0.909438	0.897149	0.903252	6
HG002+HG003+HG004	NovaSeq	70	TRUE	GT	GATK4	genome	SNV	3822422	553325	462928	0.873547	0.891974	0.882665	6
HG002+HG003+HG004	NovaSeq	70	TRUE	GT	GATK4	genome	INDEL	475666	95392	76682	0.832956	0.861171	0.846828	6
HG002+HG003+HG004	NovaSeq	70	TRUE	GT	FreeBayes	genome	SNV	3850238	527231	482010	0.879558	0.888739	0.884125	6
HG002+HG003+HG004	NovaSeq	70	TRUE	GT	FreeBayes	genome	INDEL	447015	125524	113793	0.780759	0.797091	0.78884	6
HG002+HG003+HG004	NovaSeq	70	TRUE	GT	Octopus	alldifficult	SNV	674099	87327	81392	0.885311	0.892266	0.888775	6
HG002+HG003+HG004	NovaSeq	70	TRUE	GT	Octopus	alldifficult	INDEL	325660	40012	47247	0.89058	0.873301	0.881856	6
HG002+HG003+HG004	NovaSeq	70	TRUE	GT	GATK4	alldifficult	SNV	605977	155820	102067	0.795457	0.855847	0.824548	6
HG002+HG003+HG004	NovaSeq	70	TRUE	GT	GATK4	alldifficult	INDEL	296468	72527	56103	0.803447	0.840875	0.821735	6
HG002+HG003+HG004	NovaSeq	70	TRUE	GT	FreeBayes	alldifficult	SNV	629735	133117	108330	0.825501	0.853224	0.839134	6
HG002+HG003+HG004	NovaSeq	70	TRUE	GT	FreeBayes	alldifficult	INDEL	277232	93219	75779	0.748363	0.785335	0.766404	6
HG002+HG003+HG004	NovaSeq	70	TRUE	GT	Octopus	alllowmapandsegdup	SNV	260760	57480	54938	0.819382	0.825979	0.822667	6
HG002+HG003+HG004	NovaSeq	70	TRUE	GT	Octopus	alllowmapandsegdup	INDEL	14487	3175	3204	0.820236	0.818891	0.819563	6
HG002+HG003+HG004	NovaSeq	70	TRUE	GT	GATK4	alllowmapandsegdup	SNV	216511	101775	53367	0.68024	0.802255	0.736227	6
HG002+HG003+HG004	NovaSeq	70	TRUE	GT	GATK4	alllowmapandsegdup	INDEL	12233	5465	3307	0.691208	0.787194	0.736085	6
HG002+HG003+HG004	NovaSeq	70	TRUE	GT	FreeBayes	alllowmapandsegdup	SNV	240360	78083	60812	0.754798	0.798082	0.775837	6
HG002+HG003+HG004	NovaSeq	70	TRUE	GT	FreeBayes	alllowmapandsegdup	INDEL	12393	5328	9227	0.69934	0.573219	0.63003	6
HG002+HG003+HG004	NovaSeq	70	TRUE	GT	Octopus	notinalldifficult	SNV	3416631	196526	197482	0.945608	0.945358	0.945483	6
HG002+HG003+HG004	NovaSeq	70	TRUE	GT	Octopus	notinalldifficult	INDEL	190962	11438	12071	0.943488	0.940547	0.942015	6
HG002+HG003+HG004	NovaSeq	70	TRUE	GT	GATK4	notinalldifficult	SNV	3216445	397505	360861	0.890008	0.899125	0.894543	6
HG002+HG003+HG004	NovaSeq	70	TRUE	GT	GATK4	notinalldifficult	INDEL	179537	22917	20627	0.886804	0.89695	0.891848	6
HG002+HG003+HG004	NovaSeq	70	TRUE	GT	FreeBayes	notinalldifficult	SNV	3220503	394114	373680	0.890967	0.896032	0.893492	6
HG002+HG003+HG004	NovaSeq	70	TRUE	GT	FreeBayes	notinalldifficult	INDEL	170109	32371	49564	0.840127	0.774374	0.805912	6
HG002+HG003+HG004	NovaSeq	70	TRUE	GT	Octopus	notinalllowmapandsegdup	SNV	3829970	226373	223936	0.944193	0.94476	0.944477	6
HG002+HG003+HG004	NovaSeq	70	TRUE	GT	Octopus	notinalllowmapandsegdup	INDEL	501586	48220	56051	0.912296	0.899485	0.905845	6
HG002+HG003+HG004	NovaSeq	70	TRUE	GT	GATK4	notinalllowmapandsegdup	SNV	3605911	451550	409561	0.888711	0.898004	0.893334	6
HG002+HG003+HG004	NovaSeq	70	TRUE	GT	GATK4	notinalllowmapandsegdup	INDEL	463254	89895	73348	0.837485	0.86331	0.850202	6
HG002+HG003+HG004	NovaSeq	70	TRUE	GT	FreeBayes	notinalllowmapandsegdup	SNV	3609878	449148	421198	0.889346	0.895512	0.892418	6
HG002+HG003+HG004	NovaSeq	70	TRUE	GT	FreeBayes	notinalllowmapandsegdup	INDEL	434458	120149	104897	0.783362	0.805514	0.794284	6
HG002+HG003+HG004	NovaSeq	70	TRUE	GT	Octopus	AllTandemRepeatsandHomopolymers	SNV	180462	15274	12328	0.921966	0.936055	0.928957	6
HG002+HG003+HG004	NovaSeq	70	TRUE	GT	Octopus	AllTandemRepeatsandHomopolymers	INDEL	292337	35980	43194	0.890411	0.871267	0.880735	6
HG002+HG003+HG004	NovaSeq	70	TRUE	GT	GATK4	AllTandemRepeatsandHomopolymers	SNV	170807	25220	21747	0.871344	0.88706	0.879132	6
HG002+HG003+HG004	NovaSeq	70	TRUE	GT	GATK4	AllTandemRepeatsandHomopolymers	INDEL	266384	65255	50814	0.803235	0.839804	0.821112	6
HG002+HG003+HG004	NovaSeq	70	TRUE	GT	FreeBayes	AllTandemRepeatsandHomopolymers	SNV	170135	26694	21031	0.86438	0.889986	0.876996	6
HG002+HG003+HG004	NovaSeq	70	TRUE	GT	FreeBayes	AllTandemRepeatsandHomopolymers	INDEL	248085	84985	62388	0.744843	0.799055	0.770997	6
HG002+HG003+HG004	NovaSeq	70	TRUE	GT	Octopus	notinAllTandemRepeatsandHomopolymers	SNV	3910268	268579	266546	0.935729	0.936184	0.935957	6
HG002+HG003+HG004	NovaSeq	70	TRUE	GT	Octopus	notinAllTandemRepeatsandHomopolymers	INDEL	224480	15485	16096	0.93547	0.933094	0.93428	6
HG002+HG003+HG004	NovaSeq	70	TRUE	GT	GATK4	notinAllTandemRepeatsandHomopolymers	SNV	3651615	528105	441181	0.873651	0.892205	0.882831	6
HG002+HG003+HG004	NovaSeq	70	TRUE	GT	GATK4	notinAllTandemRepeatsandHomopolymers	INDEL	209792	30228	25947	0.87406	0.889933	0.881926	6
HG002+HG003+HG004	NovaSeq	70	TRUE	GT	FreeBayes	notinAllTandemRepeatsandHomopolymers	SNV	3680103	500537	460979	0.880273	0.888682	0.884457	6
HG002+HG003+HG004	NovaSeq	70	TRUE	GT	FreeBayes	notinAllTandemRepeatsandHomopolymers	INDEL	199416	40656	63884	0.830651	0.757372	0.792321	6
HG002+HG003+HG004	NovaSeq	80	TRUE	GT	Octopus	genome	SNV	4140008	234527	233196	0.946388	0.946676	0.946532	6
HG002+HG003+HG004	NovaSeq	80	TRUE	GT	Octopus	genome	INDEL	524399	43207	50300	0.923879	0.912476	0.918142	6
HG002+HG003+HG004	NovaSeq	80	TRUE	GT	GATK4	genome	SNV	3899978	475795	395813	0.891266	0.90786	0.899487	6
HG002+HG003+HG004	NovaSeq	80	TRUE	GT	GATK4	genome	INDEL	487324	83738	66609	0.853364	0.879753	0.866358	6
HG002+HG003+HG004	NovaSeq	80	TRUE	GT	FreeBayes	genome	SNV	3921845	455588	420744	0.895923	0.903112	0.899503	6
HG002+HG003+HG004	NovaSeq	80	TRUE	GT	FreeBayes	genome	INDEL	459434	113052	104667	0.802524	0.814453	0.808445	6
HG002+HG003+HG004	NovaSeq	80	TRUE	GT	Octopus	alldifficult	SNV	683004	78406	74977	0.897025	0.901083	0.89905	6
HG002+HG003+HG004	NovaSeq	80	TRUE	GT	Octopus	alldifficult	INDEL	331627	33977	40530	0.907066	0.891094	0.899009	6
HG002+HG003+HG004	NovaSeq	80	TRUE	GT	GATK4	alldifficult	SNV	618370	143448	91580	0.811703	0.871005	0.840309	6
HG002+HG003+HG004	NovaSeq	80	TRUE	GT	GATK4	alldifficult	INDEL	304488	64512	49184	0.825171	0.860933	0.842673	6
HG002+HG003+HG004	NovaSeq	80	TRUE	GT	FreeBayes	alldifficult	SNV	641480	121338	99977	0.840935	0.865161	0.852876	6
HG002+HG003+HG004	NovaSeq	80	TRUE	GT	FreeBayes	alldifficult	INDEL	286232	84164	70298	0.772773	0.802827	0.787513	6
HG002+HG003+HG004	NovaSeq	80	TRUE	GT	Octopus	alllowmapandsegdup	SNV	264370	53860	53330	0.830751	0.832137	0.831444	6
HG002+HG003+HG004	NovaSeq	80	TRUE	GT	Octopus	alllowmapandsegdup	INDEL	14633	3028	3147	0.828549	0.823003	0.825767	6
HG002+HG003+HG004	NovaSeq	80	TRUE	GT	GATK4	alllowmapandsegdup	SNV	220805	97482	49887	0.693729	0.815706	0.749789	6
HG002+HG003+HG004	NovaSeq	80	TRUE	GT	GATK4	alllowmapandsegdup	INDEL	12482	5221	3090	0.705078	0.801567	0.750233	6
HG002+HG003+HG004	NovaSeq	80	TRUE	GT	FreeBayes	alllowmapandsegdup	SNV	244811	73628	58302	0.768785	0.807656	0.787741	6
HG002+HG003+HG004	NovaSeq	80	TRUE	GT	FreeBayes	alllowmapandsegdup	INDEL	12676	5044	9099	0.71535	0.582135	0.641904	6
HG002+HG003+HG004	NovaSeq	80	TRUE	GT	Octopus	notinalldifficult	SNV	3457004	156121	158219	0.956791	0.956235	0.956513	6
HG002+HG003+HG004	NovaSeq	80	TRUE	GT	Octopus	notinalldifficult	INDEL	193141	9252	9882	0.954287	0.951326	0.952804	6
HG002+HG003+HG004	NovaSeq	80	TRUE	GT	GATK4	notinalldifficult	SNV	3281608	332347	304233	0.908038	0.915157	0.911584	6
HG002+HG003+HG004	NovaSeq	80	TRUE	GT	GATK4	notinalldifficult	INDEL	183179	19274	17466	0.904798	0.912951	0.908856	6
HG002+HG003+HG004	NovaSeq	80	TRUE	GT	FreeBayes	notinalldifficult	SNV	3280365	334250	320767	0.907528	0.910926	0.909224	6
HG002+HG003+HG004	NovaSeq	80	TRUE	GT	FreeBayes	notinalldifficult	INDEL	173547	28935	44515	0.857098	0.795861	0.825345	6
HG002+HG003+HG004	NovaSeq	80	TRUE	GT	Octopus	notinalllowmapandsegdup	SNV	3875638	180667	179866	0.95546	0.955649	0.955555	6
HG002+HG003+HG004	NovaSeq	80	TRUE	GT	Octopus	notinalllowmapandsegdup	INDEL	509569	40164	47215	0.926939	0.915201	0.921032	6
HG002+HG003+HG004	NovaSeq	80	TRUE	GT	GATK4	notinalllowmapandsegdup	SNV	3679173	378313	345926	0.906762	0.914058	0.910395	6
HG002+HG003+HG004	NovaSeq	80	TRUE	GT	GATK4	notinalllowmapandsegdup	INDEL	474668	78480	63484	0.858121	0.882033	0.869913	6
HG002+HG003+HG004	NovaSeq	80	TRUE	GT	FreeBayes	notinalllowmapandsegdup	SNV	3677034	381960	362442	0.905898	0.910275	0.908081	6
HG002+HG003+HG004	NovaSeq	80	TRUE	GT	FreeBayes	notinalllowmapandsegdup	INDEL	446589	107966	95882	0.805311	0.82325	0.814181	6
HG002+HG003+HG004	NovaSeq	80	TRUE	GT	Octopus	AllTandemRepeatsandHomopolymers	SNV	182973	12775	10249	0.934738	0.946957	0.940808	6
HG002+HG003+HG004	NovaSeq	80	TRUE	GT	Octopus	AllTandemRepeatsandHomopolymers	INDEL	297984	30267	36719	0.907793	0.890294	0.898958	6
HG002+HG003+HG004	NovaSeq	80	TRUE	GT	GATK4	AllTandemRepeatsandHomopolymers	SNV	174352	21676	18693	0.889424	0.903168	0.896243	6
HG002+HG003+HG004	NovaSeq	80	TRUE	GT	GATK4	AllTandemRepeatsandHomopolymers	INDEL	273867	57772	44351	0.825799	0.860627	0.842853	6
HG002+HG003+HG004	NovaSeq	80	TRUE	GT	FreeBayes	AllTandemRepeatsandHomopolymers	SNV	173518	23282	18622	0.881697	0.903081	0.892261	6
HG002+HG003+HG004	NovaSeq	80	TRUE	GT	FreeBayes	AllTandemRepeatsandHomopolymers	INDEL	256462	76553	57358	0.770121	0.817226	0.792975	6
HG002+HG003+HG004	NovaSeq	80	TRUE	GT	Octopus	notinAllTandemRepeatsandHomopolymers	SNV	3957035	221752	222947	0.946934	0.946663	0.946799	6
HG002+HG003+HG004	NovaSeq	80	TRUE	GT	Octopus	notinAllTandemRepeatsandHomopolymers	INDEL	226978	12978	13671	0.945915	0.943191	0.944551	6
HG002+HG003+HG004	NovaSeq	80	TRUE	GT	GATK4	notinAllTandemRepeatsandHomopolymers	SNV	3725626	454119	377120	0.891352	0.908081	0.899639	6
HG002+HG003+HG004	NovaSeq	80	TRUE	GT	GATK4	notinAllTandemRepeatsandHomopolymers	INDEL	213971	26053	22331	0.891457	0.905498	0.898423	6
HG002+HG003+HG004	NovaSeq	80	TRUE	GT	FreeBayes	notinAllTandemRepeatsandHomopolymers	SNV	3748327	432306	402122	0.896593	0.903114	0.899842	6
HG002+HG003+HG004	NovaSeq	80	TRUE	GT	FreeBayes	notinAllTandemRepeatsandHomopolymers	INDEL	203480	36594	58268	0.847572	0.777389	0.810965	6
HG002+HG003+HG004	NovaSeq	90	TRUE	GT	Octopus	genome	SNV	4176348	198044	199044	0.954727	0.954508	0.954617	6
HG002+HG003+HG004	NovaSeq	90	TRUE	GT	Octopus	genome	INDEL	530388	37187	43791	0.934481	0.923733	0.929076	6
HG002+HG003+HG004	NovaSeq	90	TRUE	GT	GATK4	genome	SNV	3963286	412397	339953	0.905753	0.921001	0.913313	6
HG002+HG003+HG004	NovaSeq	90	TRUE	GT	GATK4	genome	INDEL	496425	74613	58574	0.869338	0.894461	0.881721	6
HG002+HG003+HG004	NovaSeq	90	TRUE	GT	FreeBayes	genome	SNV	3978647	398787	371198	0.908899	0.914664	0.911773	6
HG002+HG003+HG004	NovaSeq	90	TRUE	GT	FreeBayes	genome	INDEL	469035	103414	96652	0.819348	0.829142	0.824216	6
HG002+HG003+HG004	NovaSeq	90	TRUE	GT	Octopus	alldifficult	SNV	689209	72165	70498	0.905217	0.907204	0.906209	6
HG002+HG003+HG004	NovaSeq	90	TRUE	GT	Octopus	alldifficult	INDEL	335883	29691	35791	0.918783	0.903703	0.91118	6
HG002+HG003+HG004	NovaSeq	90	TRUE	GT	GATK4	alldifficult	SNV	628355	133439	82836	0.824836	0.883525	0.853172	6
HG002+HG003+HG004	NovaSeq	90	TRUE	GT	GATK4	alldifficult	INDEL	310713	58271	43687	0.842077	0.87673	0.859054	6
HG002+HG003+HG004	NovaSeq	90	TRUE	GT	FreeBayes	alldifficult	SNV	651386	111434	92981	0.853918	0.875087	0.864373	6
HG002+HG003+HG004	NovaSeq	90	TRUE	GT	FreeBayes	alldifficult	INDEL	293067	77297	65374	0.791295	0.817616	0.80424	6
HG002+HG003+HG004	NovaSeq	90	TRUE	GT	Octopus	alllowmapandsegdup	SNV	266722	51479	52324	0.838219	0.835999	0.837107	6
HG002+HG003+HG004	NovaSeq	90	TRUE	GT	Octopus	alllowmapandsegdup	INDEL	14834	2824	3032	0.840072	0.830292	0.835154	6
HG002+HG003+HG004	NovaSeq	90	TRUE	GT	GATK4	alllowmapandsegdup	SNV	224412	93873	46767	0.705066	0.827542	0.76141	6
HG002+HG003+HG004	NovaSeq	90	TRUE	GT	GATK4	alllowmapandsegdup	INDEL	12653	5050	2957	0.714738	0.81057	0.759643	6
HG002+HG003+HG004	NovaSeq	90	TRUE	GT	FreeBayes	alllowmapandsegdup	SNV	248745	69694	56100	0.781139	0.815972	0.798175	6
HG002+HG003+HG004	NovaSeq	90	TRUE	GT	FreeBayes	alllowmapandsegdup	INDEL	12861	4859	8939	0.72579	0.589954	0.65086	6
HG002+HG003+HG004	NovaSeq	90	TRUE	GT	Octopus	notinalldifficult	SNV	3487139	125879	128546	0.96516	0.964448	0.964804	6
HG002+HG003+HG004	NovaSeq	90	TRUE	GT	Octopus	notinalldifficult	INDEL	194884	7508	8109	0.962904	0.960053	0.961476	6
HG002+HG003+HG004	NovaSeq	90	TRUE	GT	GATK4	notinalldifficult	SNV	3334931	278958	257117	0.922809	0.92842	0.925606	6
HG002+HG003+HG004	NovaSeq	90	TRUE	GT	GATK4	notinalldifficult	INDEL	186057	16388	14924	0.91905	0.925744	0.922385	6
HG002+HG003+HG004	NovaSeq	90	TRUE	GT	FreeBayes	notinalldifficult	SNV	3327261	287353	278217	0.920502	0.922835	0.921667	6
HG002+HG003+HG004	NovaSeq	90	TRUE	GT	FreeBayes	notinalldifficult	INDEL	176327	26150	40250	0.87085	0.814154	0.841548	6
HG002+HG003+HG004	NovaSeq	90	TRUE	GT	Octopus	notinalllowmapandsegdup	SNV	3909626	146565	146720	0.963866	0.96383	0.963848	6
HG002+HG003+HG004	NovaSeq	90	TRUE	GT	Octopus	notinalllowmapandsegdup	INDEL	515356	34348	40828	0.937515	0.926593	0.932022	6
HG002+HG003+HG004	NovaSeq	90	TRUE	GT	GATK4	notinalllowmapandsegdup	SNV	3738874	318524	293186	0.921496	0.927286	0.924382	6
HG002+HG003+HG004	NovaSeq	90	TRUE	GT	GATK4	notinalllowmapandsegdup	INDEL	483585	69539	55590	0.87428	0.896898	0.885444	6
HG002+HG003+HG004	NovaSeq	90	TRUE	GT	FreeBayes	notinalllowmapandsegdup	SNV	3729902	329093	315098	0.918923	0.922102	0.920509	6
HG002+HG003+HG004	NovaSeq	90	TRUE	GT	FreeBayes	notinalllowmapandsegdup	INDEL	456003	98515	88018	0.822341	0.838208	0.830199	6
HG002+HG003+HG004	NovaSeq	90	TRUE	GT	Octopus	AllTandemRepeatsandHomopolymers	SNV	184694	11043	8829	0.943582	0.954378	0.948949	6
HG002+HG003+HG004	NovaSeq	90	TRUE	GT	Octopus	AllTandemRepeatsandHomopolymers	INDEL	301863	26362	32259	0.919683	0.903451	0.911495	6
HG002+HG003+HG004	NovaSeq	90	TRUE	GT	GATK4	AllTandemRepeatsandHomopolymers	SNV	177322	18704	16108	0.904584	0.916724	0.910614	6
HG002+HG003+HG004	NovaSeq	90	TRUE	GT	GATK4	AllTandemRepeatsandHomopolymers	INDEL	279633	51992	39242	0.843221	0.876936	0.859748	6
HG002+HG003+HG004	NovaSeq	90	TRUE	GT	FreeBayes	AllTandemRepeatsandHomopolymers	SNV	176240	20554	16704	0.895556	0.913426	0.904402	6
HG002+HG003+HG004	NovaSeq	90	TRUE	GT	FreeBayes	AllTandemRepeatsandHomopolymers	INDEL	262824	70159	52910	0.789302	0.832422	0.810289	6
HG002+HG003+HG004	NovaSeq	90	TRUE	GT	Octopus	notinAllTandemRepeatsandHomopolymers	SNV	3991654	187001	190215	0.955249	0.954514	0.954881	6
HG002+HG003+HG004	NovaSeq	90	TRUE	GT	Octopus	notinAllTandemRepeatsandHomopolymers	INDEL	229097	10854	11618	0.954766	0.951735	0.953248	6
HG002+HG003+HG004	NovaSeq	90	TRUE	GT	GATK4	notinAllTandemRepeatsandHomopolymers	SNV	3785964	393693	323845	0.905807	0.921202	0.91344	6
HG002+HG003+HG004	NovaSeq	90	TRUE	GT	GATK4	notinAllTandemRepeatsandHomopolymers	INDEL	217311	22703	19402	0.90541	0.918036	0.911679	6
HG002+HG003+HG004	NovaSeq	90	TRUE	GT	FreeBayes	notinAllTandemRepeatsandHomopolymers	SNV	3802407	378233	354494	0.909527	0.914722	0.912117	6
HG002+HG003+HG004	NovaSeq	90	TRUE	GT	FreeBayes	notinAllTandemRepeatsandHomopolymers	INDEL	206733	33334	53453	0.861147	0.794559	0.826514	6
HG002+HG003+HG004	NovaSeq	100	TRUE	GT	Octopus	genome	SNV	4204174	170231	173083	0.961085	0.960459	0.960772	6
HG002+HG003+HG004	NovaSeq	100	TRUE	GT	Octopus	genome	INDEL	535096	32454	38577	0.942817	0.932754	0.937759	6
HG002+HG003+HG004	NovaSeq	100	TRUE	GT	GATK4	genome	SNV	4013903	361791	295058	0.917318	0.931525	0.924367	6
HG002+HG003+HG004	NovaSeq	100	TRUE	GT	GATK4	genome	INDEL	504170	66870	51607	0.882898	0.907144	0.894857	6
HG002+HG003+HG004	NovaSeq	100	TRUE	GT	FreeBayes	genome	SNV	4024298	353140	330644	0.919327	0.924076	0.921696	6
HG002+HG003+HG004	NovaSeq	100	TRUE	GT	FreeBayes	genome	INDEL	476749	95696	90359	0.832829	0.840667	0.83673	6
HG002+HG003+HG004	NovaSeq	100	TRUE	GT	Octopus	alldifficult	SNV	694003	67349	67365	0.91154	0.911521	0.911531	6
HG002+HG003+HG004	NovaSeq	100	TRUE	GT	Octopus	alldifficult	INDEL	339253	26286	31942	0.92809	0.913948	0.920965	6
HG002+HG003+HG004	NovaSeq	100	TRUE	GT	GATK4	alldifficult	SNV	636374	125435	75907	0.835346	0.893431	0.863413	6
HG002+HG003+HG004	NovaSeq	100	TRUE	GT	GATK4	alldifficult	INDEL	316054	52930	38860	0.856552	0.890509	0.8732	6
HG002+HG003+HG004	NovaSeq	100	TRUE	GT	FreeBayes	alldifficult	SNV	658999	103821	87271	0.863898	0.883057	0.873373	6
HG002+HG003+HG004	NovaSeq	100	TRUE	GT	FreeBayes	alldifficult	INDEL	298578	71779	61580	0.80619	0.829019	0.817445	6
HG002+HG003+HG004	NovaSeq	100	TRUE	GT	Octopus	alllowmapandsegdup	SNV	268611	49620	51801	0.844076	0.83833	0.841193	6
HG002+HG003+HG004	NovaSeq	100	TRUE	GT	Octopus	alllowmapandsegdup	INDEL	14932	2727	3066	0.845574	0.829648	0.837535	6
HG002+HG003+HG004	NovaSeq	100	TRUE	GT	GATK4	alllowmapandsegdup	SNV	227137	91148	44443	0.713628	0.836354	0.770132	6
HG002+HG003+HG004	NovaSeq	100	TRUE	GT	GATK4	alllowmapandsegdup	INDEL	12855	4846	2742	0.72623	0.824197	0.772118	6
HG002+HG003+HG004	NovaSeq	100	TRUE	GT	FreeBayes	alllowmapandsegdup	SNV	251624	66815	54454	0.79018	0.822091	0.80582	6
HG002+HG003+HG004	NovaSeq	100	TRUE	GT	FreeBayes	alllowmapandsegdup	INDEL	13002	4720	8821	0.733664	0.595793	0.65758	6
HG002+HG003+HG004	NovaSeq	100	TRUE	GT	Octopus	notinalldifficult	SNV	3510171	102882	105718	0.971525	0.970763	0.971144	6
HG002+HG003+HG004	NovaSeq	100	TRUE	GT	Octopus	notinalldifficult	INDEL	196209	6193	6763	0.969402	0.96668	0.968039	6
HG002+HG003+HG004	NovaSeq	100	TRUE	GT	GATK4	notinalldifficult	SNV	3377529	236356	219151	0.934598	0.939069	0.936828	6
HG002+HG003+HG004	NovaSeq	100	TRUE	GT	GATK4	notinalldifficult	INDEL	188467	13980	12775	0.930945	0.936519	0.933724	6
HG002+HG003+HG004	NovaSeq	100	TRUE	GT	FreeBayes	notinalldifficult	SNV	3365299	249319	243373	0.931025	0.932559	0.931791	6
HG002+HG003+HG004	NovaSeq	100	TRUE	GT	FreeBayes	notinalldifficult	INDEL	178529	23951	36942	0.881712	0.828552	0.854306	6
HG002+HG003+HG004	NovaSeq	100	TRUE	GT	Octopus	notinalllowmapandsegdup	SNV	3935563	120611	121282	0.970265	0.970104	0.970185	6
HG002+HG003+HG004	NovaSeq	100	TRUE	GT	Octopus	notinalllowmapandsegdup	INDEL	519964	29715	35584	0.945941	0.935948	0.940918	6
HG002+HG003+HG004	NovaSeq	100	TRUE	GT	GATK4	notinalllowmapandsegdup	SNV	3786766	270643	250615	0.933297	0.937926	0.935606	6
HG002+HG003+HG004	NovaSeq	100	TRUE	GT	GATK4	notinalllowmapandsegdup	INDEL	491131	61997	48835	0.887916	0.909559	0.898607	6
HG002+HG003+HG004	NovaSeq	100	TRUE	GT	FreeBayes	notinalllowmapandsegdup	SNV	3772674	286325	276190	0.929459	0.931786	0.930621	6
HG002+HG003+HG004	NovaSeq	100	TRUE	GT	FreeBayes	notinalllowmapandsegdup	INDEL	463576	90936	81812	0.836007	0.849993	0.842942	6
HG002+HG003+HG004	NovaSeq	100	TRUE	GT	Octopus	AllTandemRepeatsandHomopolymers	SNV	186198	9535	7575	0.951286	0.960908	0.956073	6
HG002+HG003+HG004	NovaSeq	100	TRUE	GT	Octopus	AllTandemRepeatsandHomopolymers	INDEL	305024	23172	28467	0.929396	0.914639	0.921959	6
HG002+HG003+HG004	NovaSeq	100	TRUE	GT	GATK4	AllTandemRepeatsandHomopolymers	SNV	179764	16259	14002	0.917056	0.927738	0.922366	6
HG002+HG003+HG004	NovaSeq	100	TRUE	GT	GATK4	AllTandemRepeatsandHomopolymers	INDEL	284566	47059	34826	0.858096	0.890962	0.87422	6
HG002+HG003+HG004	NovaSeq	100	TRUE	GT	FreeBayes	AllTandemRepeatsandHomopolymers	SNV	178372	18425	14971	0.906376	0.922568	0.9144	6
HG002+HG003+HG004	NovaSeq	100	TRUE	GT	FreeBayes	AllTandemRepeatsandHomopolymers	INDEL	268014	64962	49429	0.804905	0.84429	0.824127	6
HG002+HG003+HG004	NovaSeq	100	TRUE	GT	Octopus	notinAllTandemRepeatsandHomopolymers	SNV	4017976	160696	165508	0.961544	0.960438	0.96099	6
HG002+HG003+HG004	NovaSeq	100	TRUE	GT	Octopus	notinAllTandemRepeatsandHomopolymers	INDEL	230632	9323	10214	0.961147	0.957591	0.959366	6
HG002+HG003+HG004	NovaSeq	100	TRUE	GT	GATK4	notinAllTandemRepeatsandHomopolymers	SNV	3834139	345532	281056	0.91733	0.931703	0.924461	6
HG002+HG003+HG004	NovaSeq	100	TRUE	GT	GATK4	notinAllTandemRepeatsandHomopolymers	INDEL	220135	19881	16838	0.917168	0.928945	0.923019	6
HG002+HG003+HG004	NovaSeq	100	TRUE	GT	FreeBayes	notinAllTandemRepeatsandHomopolymers	SNV	3845926	334715	315673	0.919937	0.924146	0.922037	6
HG002+HG003+HG004	NovaSeq	100	TRUE	GT	FreeBayes	notinAllTandemRepeatsandHomopolymers	INDEL	209264	30806	49777	0.871679	0.807841	0.838547	6
HG003+HG004	NovaSeq	10	TRUE	GT	Octopus	genome	SNV	2726186	1684649	797423	0.618066	0.773691	0.687178	4
HG003+HG004	NovaSeq	10	TRUE	GT	Octopus	genome	INDEL	348557	250724	157518	0.581625	0.688746	0.630669	4
HG003+HG004	NovaSeq	10	TRUE	GT	GATK4	genome	SNV	2703884	1706941	940492	0.613011	0.741933	0.671339	4
HG003+HG004	NovaSeq	10	TRUE	GT	GATK4	genome	INDEL	301501	297781	144811	0.503104	0.675539	0.576708	4
HG003+HG004	NovaSeq	10	TRUE	GT	FreeBayes	genome	SNV	2430089	1980778	915501	0.550932	0.726356	0.626598	4
HG003+HG004	NovaSeq	10	TRUE	GT	FreeBayes	genome	INDEL	249290	350012	151516	0.415967	0.621972	0.498526	4
HG003+HG004	NovaSeq	10	TRUE	GT	Octopus	alldifficult	SNV	444482	336476	136640	0.56915	0.764869	0.652652	4
HG003+HG004	NovaSeq	10	TRUE	GT	Octopus	alldifficult	INDEL	211991	183232	118914	0.536383	0.64064	0.583894	4
HG003+HG004	NovaSeq	10	TRUE	GT	GATK4	alldifficult	SNV	430199	350749	166140	0.550868	0.7214	0.624705	4
HG003+HG004	NovaSeq	10	TRUE	GT	GATK4	alldifficult	INDEL	176671	218553	102191	0.447015	0.633543	0.524179	4
HG003+HG004	NovaSeq	10	TRUE	GT	FreeBayes	alldifficult	SNV	395879	385103	154207	0.506899	0.719667	0.594829	4
HG003+HG004	NovaSeq	10	TRUE	GT	FreeBayes	alldifficult	INDEL	145499	249745	94178	0.368125	0.607063	0.458322	4
HG003+HG004	NovaSeq	10	TRUE	GT	Octopus	alllowmapandsegdup	SNV	168898	159379	57623	0.514498	0.745617	0.608863	4
HG003+HG004	NovaSeq	10	TRUE	GT	Octopus	alllowmapandsegdup	INDEL	9840	8707	3663	0.530544	0.728727	0.614041	4
HG003+HG004	NovaSeq	10	TRUE	GT	GATK4	alllowmapandsegdup	SNV	154192	174079	68411	0.469709	0.692677	0.559809	4
HG003+HG004	NovaSeq	10	TRUE	GT	GATK4	alllowmapandsegdup	INDEL	8371	10174	4226	0.451389	0.664523	0.537602	4
HG003+HG004	NovaSeq	10	TRUE	GT	FreeBayes	alllowmapandsegdup	SNV	149039	179238	64077	0.454004	0.699333	0.550576	4
HG003+HG004	NovaSeq	10	TRUE	GT	FreeBayes	alllowmapandsegdup	INDEL	7273	11274	7611	0.392139	0.488646	0.435105	4
HG003+HG004	NovaSeq	10	TRUE	GT	Octopus	notinalldifficult	SNV	2281704	1348173	660783	0.62859	0.775434	0.694333	4
HG003+HG004	NovaSeq	10	TRUE	GT	Octopus	notinalldifficult	INDEL	136790	67668	38643	0.669037	0.779728	0.720154	4
HG003+HG004	NovaSeq	10	TRUE	GT	GATK4	notinalldifficult	SNV	2273685	1356192	774352	0.626381	0.745951	0.680957	4
HG003+HG004	NovaSeq	10	TRUE	GT	GATK4	notinalldifficult	INDEL	125058	79400	42731	0.611656	0.745329	0.671909	4
HG003+HG004	NovaSeq	10	TRUE	GT	FreeBayes	notinalldifficult	SNV	2034210	1595675	761294	0.560406	0.727672	0.633179	4
HG003+HG004	NovaSeq	10	TRUE	GT	FreeBayes	notinalldifficult	INDEL	103889	100569	78957	0.508119	0.568178	0.536473	4
HG003+HG004	NovaSeq	10	TRUE	GT	Octopus	notinalllowmapandsegdup	SNV	2557288	1525270	739800	0.626394	0.77562	0.693065	4
HG003+HG004	NovaSeq	10	TRUE	GT	Octopus	notinalllowmapandsegdup	INDEL	338564	241953	153818	0.583211	0.687604	0.63112	4
HG003+HG004	NovaSeq	10	TRUE	GT	GATK4	notinalllowmapandsegdup	SNV	2549692	1532862	872081	0.624534	0.745138	0.679526	4
HG003+HG004	NovaSeq	10	TRUE	GT	GATK4	notinalllowmapandsegdup	INDEL	293004	287516	140536	0.504727	0.675841	0.577883	4
HG003+HG004	NovaSeq	10	TRUE	GT	FreeBayes	notinalllowmapandsegdup	SNV	2281050	1801540	851424	0.558726	0.728194	0.632302	4
HG003+HG004	NovaSeq	10	TRUE	GT	FreeBayes	notinalllowmapandsegdup	INDEL	241889	338649	144264	0.416664	0.626407	0.500447	4
HG003+HG004	NovaSeq	10	TRUE	GT	Octopus	AllTandemRepeatsandHomopolymers	SNV	118993	85170	35113	0.582833	0.77215	0.664266	4
HG003+HG004	NovaSeq	10	TRUE	GT	Octopus	AllTandemRepeatsandHomopolymers	INDEL	188711	168289	111997	0.528602	0.627556	0.573844	4
HG003+HG004	NovaSeq	10	TRUE	GT	GATK4	AllTandemRepeatsandHomopolymers	SNV	120565	83594	44414	0.590545	0.73079	0.653225	4
HG003+HG004	NovaSeq	10	TRUE	GT	GATK4	AllTandemRepeatsandHomopolymers	INDEL	155740	201263	94012	0.436243	0.623579	0.513354	4
HG003+HG004	NovaSeq	10	TRUE	GT	FreeBayes	AllTandemRepeatsandHomopolymers	SNV	106896	97287	39082	0.52353	0.732275	0.610553	4
HG003+HG004	NovaSeq	10	TRUE	GT	FreeBayes	AllTandemRepeatsandHomopolymers	INDEL	127969	229052	81202	0.358435	0.611791	0.452034	4
HG003+HG004	NovaSeq	10	TRUE	GT	Octopus	notinAllTandemRepeatsandHomopolymers	SNV	2607193	1599479	762310	0.619776	0.773762	0.688261	4
HG003+HG004	NovaSeq	10	TRUE	GT	Octopus	notinAllTandemRepeatsandHomopolymers	INDEL	160194	82709	45590	0.659498	0.778457	0.714057	4
HG003+HG004	NovaSeq	10	TRUE	GT	GATK4	notinAllTandemRepeatsandHomopolymers	SNV	2583319	1623347	896078	0.614101	0.742462	0.672209	4
HG003+HG004	NovaSeq	10	TRUE	GT	GATK4	notinAllTandemRepeatsandHomopolymers	INDEL	146099	96802	50961	0.601475	0.741393	0.664145	4
HG003+HG004	NovaSeq	10	TRUE	GT	FreeBayes	notinAllTandemRepeatsandHomopolymers	SNV	2323193	1883491	876419	0.552262	0.726086	0.627356	4
HG003+HG004	NovaSeq	10	TRUE	GT	FreeBayes	notinAllTandemRepeatsandHomopolymers	INDEL	121516	121387	93797	0.500266	0.564369	0.530387	4
HG003+HG004	NovaSeq	20	TRUE	GT	Octopus	genome	SNV	3735516	675186	409382	0.846921	0.901232	0.873233	4
HG003+HG004	NovaSeq	20	TRUE	GT	Octopus	genome	INDEL	486871	112375	95790	0.812473	0.835599	0.823874	4
HG003+HG004	NovaSeq	20	TRUE	GT	GATK4	genome	SNV	3514124	896666	599426	0.796711	0.85428	0.824492	4
HG003+HG004	NovaSeq	20	TRUE	GT	GATK4	genome	INDEL	438569	160675	102529	0.73187	0.810517	0.769189	4
HG003+HG004	NovaSeq	20	TRUE	GT	FreeBayes	genome	SNV	3450611	960256	604287	0.782298	0.850974	0.815192	4
HG003+HG004	NovaSeq	20	TRUE	GT	FreeBayes	genome	INDEL	385372	213930	122218	0.643035	0.759219	0.696314	4
HG003+HG004	NovaSeq	20	TRUE	GT	Octopus	alldifficult	SNV	619483	161441	82110	0.793269	0.882966	0.835718	4
HG003+HG004	NovaSeq	20	TRUE	GT	Octopus	alldifficult	INDEL	307033	88159	75945	0.776921	0.801699	0.789115	4
HG003+HG004	NovaSeq	20	TRUE	GT	GATK4	alldifficult	SNV	567162	213756	117810	0.726276	0.828008	0.773812	4
HG003+HG004	NovaSeq	20	TRUE	GT	GATK4	alldifficult	INDEL	272309	122878	75678	0.689064	0.782526	0.732827	4
HG003+HG004	NovaSeq	20	TRUE	GT	FreeBayes	alldifficult	SNV	569121	211861	112709	0.728725	0.834696	0.778119	4
HG003+HG004	NovaSeq	20	TRUE	GT	FreeBayes	alldifficult	INDEL	234807	160437	80753	0.594081	0.744096	0.66068	4
HG003+HG004	NovaSeq	20	TRUE	GT	Octopus	alllowmapandsegdup	SNV	238186	90085	41906	0.725577	0.850385	0.783039	4
HG003+HG004	NovaSeq	20	TRUE	GT	Octopus	alllowmapandsegdup	INDEL	13671	4874	2776	0.73718	0.831215	0.781379	4
HG003+HG004	NovaSeq	20	TRUE	GT	GATK4	alllowmapandsegdup	SNV	204670	123603	54828	0.623475	0.788715	0.696428	4
HG003+HG004	NovaSeq	20	TRUE	GT	GATK4	alllowmapandsegdup	INDEL	11520	7023	3591	0.621259	0.762359	0.684614	4
HG003+HG004	NovaSeq	20	TRUE	GT	FreeBayes	alllowmapandsegdup	SNV	217212	111065	53027	0.661673	0.803777	0.725835	4
HG003+HG004	NovaSeq	20	TRUE	GT	FreeBayes	alllowmapandsegdup	INDEL	10936	7611	7445	0.589637	0.594962	0.592288	4
HG003+HG004	NovaSeq	20	TRUE	GT	Octopus	notinalldifficult	SNV	3116033	513745	327272	0.858464	0.904954	0.881096	4
HG003+HG004	NovaSeq	20	TRUE	GT	Octopus	notinalldifficult	INDEL	180140	24314	19928	0.881078	0.900394	0.890631	4
HG003+HG004	NovaSeq	20	TRUE	GT	GATK4	notinalldifficult	SNV	2946962	682910	481616	0.811864	0.859529	0.835017	4
HG003+HG004	NovaSeq	20	TRUE	GT	GATK4	notinalldifficult	INDEL	166556	37901	26922	0.814626	0.860852	0.837102	4
HG003+HG004	NovaSeq	20	TRUE	GT	FreeBayes	notinalldifficult	SNV	2881490	748395	491578	0.793824	0.854264	0.822936	4
HG003+HG004	NovaSeq	20	TRUE	GT	FreeBayes	notinalldifficult	INDEL	150784	53674	59184	0.737482	0.718128	0.727676	4
HG003+HG004	NovaSeq	20	TRUE	GT	Octopus	notinalllowmapandsegdup	SNV	3497330	585101	367476	0.856678	0.904917	0.880137	4
HG003+HG004	NovaSeq	20	TRUE	GT	Octopus	notinalllowmapandsegdup	INDEL	473005	107479	93013	0.814846	0.835671	0.825127	4
HG003+HG004	NovaSeq	20	TRUE	GT	GATK4	notinalllowmapandsegdup	SNV	3309454	773063	544598	0.810641	0.858695	0.833976	4
HG003+HG004	NovaSeq	20	TRUE	GT	GATK4	notinalllowmapandsegdup	INDEL	426867	153617	98907	0.735364	0.811883	0.771731	4
HG003+HG004	NovaSeq	20	TRUE	GT	FreeBayes	notinalllowmapandsegdup	SNV	3233399	849191	551260	0.791997	0.854344	0.82199	4
HG003+HG004	NovaSeq	20	TRUE	GT	FreeBayes	notinalllowmapandsegdup	INDEL	374269	206269	115062	0.644693	0.764859	0.699654	4
HG003+HG004	NovaSeq	20	TRUE	GT	Octopus	AllTandemRepeatsandHomopolymers	SNV	167864	36274	18400	0.822306	0.901215	0.859955	4
HG003+HG004	NovaSeq	20	TRUE	GT	Octopus	AllTandemRepeatsandHomopolymers	INDEL	275700	81269	71577	0.772336	0.793891	0.782965	4
HG003+HG004	NovaSeq	20	TRUE	GT	GATK4	AllTandemRepeatsandHomopolymers	SNV	161136	42989	28769	0.789399	0.848508	0.817887	4
HG003+HG004	NovaSeq	20	TRUE	GT	GATK4	AllTandemRepeatsandHomopolymers	INDEL	244247	112719	69501	0.68423	0.778481	0.728319	4
HG003+HG004	NovaSeq	20	TRUE	GT	FreeBayes	AllTandemRepeatsandHomopolymers	SNV	154640	49543	25973	0.75736	0.856195	0.803751	4
HG003+HG004	NovaSeq	20	TRUE	GT	FreeBayes	AllTandemRepeatsandHomopolymers	INDEL	208945	148076	69109	0.585246	0.751455	0.658017	4
HG003+HG004	NovaSeq	20	TRUE	GT	Octopus	notinAllTandemRepeatsandHomopolymers	SNV	3567652	638912	390982	0.848115	0.901233	0.873868	4
HG003+HG004	NovaSeq	20	TRUE	GT	Octopus	notinAllTandemRepeatsandHomopolymers	INDEL	211675	31224	24294	0.871453	0.897046	0.884064	4
HG003+HG004	NovaSeq	20	TRUE	GT	GATK4	notinAllTandemRepeatsandHomopolymers	SNV	3352988	853677	570657	0.797066	0.854559	0.824812	4
HG003+HG004	NovaSeq	20	TRUE	GT	GATK4	notinAllTandemRepeatsandHomopolymers	INDEL	194799	48101	33128	0.801972	0.854655	0.827476	4
HG003+HG004	NovaSeq	20	TRUE	GT	FreeBayes	notinAllTandemRepeatsandHomopolymers	SNV	3295971	910713	578314	0.783508	0.85073	0.815737	4
HG003+HG004	NovaSeq	20	TRUE	GT	FreeBayes	notinAllTandemRepeatsandHomopolymers	INDEL	176797	66106	72350	0.72785	0.709609	0.718614	4
HG003+HG004	NovaSeq	30	TRUE	GT	Octopus	genome	SNV	4098093	312633	238282	0.92912	0.94505	0.937017	4
HG003+HG004	NovaSeq	30	TRUE	GT	Octopus	genome	INDEL	537803	61424	59431	0.897495	0.90049	0.89899	4
HG003+HG004	NovaSeq	30	TRUE	GT	GATK4	genome	SNV	3867874	542902	403850	0.876915	0.90546	0.890959	4
HG003+HG004	NovaSeq	30	TRUE	GT	GATK4	genome	INDEL	500766	98470	70450	0.835674	0.876667	0.85568	4
HG003+HG004	NovaSeq	30	TRUE	GT	FreeBayes	genome	SNV	3854363	556495	401924	0.873835	0.905569	0.889419	4
HG003+HG004	NovaSeq	30	TRUE	GT	FreeBayes	genome	INDEL	451136	148158	91255	0.752779	0.831754	0.790299	4
HG003+HG004	NovaSeq	30	TRUE	GT	Octopus	alldifficult	SNV	685348	95555	58829	0.877635	0.920948	0.89877	4
HG003+HG004	NovaSeq	30	TRUE	GT	Octopus	alldifficult	INDEL	345360	49812	48510	0.873949	0.876838	0.875391	4
HG003+HG004	NovaSeq	30	TRUE	GT	GATK4	alldifficult	SNV	626200	154710	88264	0.801885	0.876461	0.837516	4
HG003+HG004	NovaSeq	30	TRUE	GT	GATK4	alldifficult	INDEL	318887	76293	52614	0.806941	0.858375	0.831864	4
HG003+HG004	NovaSeq	30	TRUE	GT	FreeBayes	alldifficult	SNV	639111	141863	84604	0.818351	0.883098	0.849492	4
HG003+HG004	NovaSeq	30	TRUE	GT	FreeBayes	alldifficult	INDEL	280877	114360	61452	0.710655	0.820488	0.761632	4
HG003+HG004	NovaSeq	30	TRUE	GT	Octopus	alllowmapandsegdup	SNV	266317	61958	35834	0.811262	0.881404	0.844879	4
HG003+HG004	NovaSeq	30	TRUE	GT	Octopus	alllowmapandsegdup	INDEL	14978	3567	2316	0.807657	0.866081	0.835849	4
HG003+HG004	NovaSeq	30	TRUE	GT	GATK4	alllowmapandsegdup	SNV	226679	101596	45182	0.690516	0.833805	0.755425	4
HG003+HG004	NovaSeq	30	TRUE	GT	GATK4	alllowmapandsegdup	INDEL	12962	5583	2949	0.698949	0.814657	0.75238	4
HG003+HG004	NovaSeq	30	TRUE	GT	FreeBayes	alllowmapandsegdup	SNV	245745	82532	44797	0.74859	0.845816	0.794239	4
HG003+HG004	NovaSeq	30	TRUE	GT	FreeBayes	alllowmapandsegdup	INDEL	12691	5856	6862	0.684262	0.649056	0.666194	4
HG003+HG004	NovaSeq	30	TRUE	GT	Octopus	notinalldifficult	SNV	3412745	217078	179453	0.940196	0.950044	0.945094	4
HG003+HG004	NovaSeq	30	TRUE	GT	Octopus	notinalldifficult	INDEL	192808	11647	11001	0.943034	0.946023	0.944526	4
HG003+HG004	NovaSeq	30	TRUE	GT	GATK4	notinalldifficult	SNV	3241674	388192	315586	0.893056	0.911284	0.902078	4
HG003+HG004	NovaSeq	30	TRUE	GT	GATK4	notinalldifficult	INDEL	182208	22248	17886	0.891184	0.910612	0.900793	4
HG003+HG004	NovaSeq	30	TRUE	GT	FreeBayes	notinalldifficult	SNV	3215252	414632	317320	0.885773	0.910173	0.897807	4
HG003+HG004	NovaSeq	30	TRUE	GT	FreeBayes	notinalldifficult	INDEL	170567	33890	42301	0.834244	0.801281	0.81743	4
HG003+HG004	NovaSeq	30	TRUE	GT	Octopus	notinalllowmapandsegdup	SNV	3831776	250675	202448	0.938597	0.949817	0.944174	4
HG003+HG004	NovaSeq	30	TRUE	GT	Octopus	notinalllowmapandsegdup	INDEL	522620	57845	57143	0.900347	0.901437	0.900892	4
HG003+HG004	NovaSeq	30	TRUE	GT	GATK4	notinalllowmapandsegdup	SNV	3641195	441306	358668	0.891903	0.91033	0.901022	4
HG003+HG004	NovaSeq	30	TRUE	GT	GATK4	notinalllowmapandsegdup	INDEL	487613	92861	67478	0.840026	0.878438	0.858802	4
HG003+HG004	NovaSeq	30	TRUE	GT	FreeBayes	notinalllowmapandsegdup	SNV	3608618	473963	357127	0.883906	0.909947	0.896738	4
HG003+HG004	NovaSeq	30	TRUE	GT	FreeBayes	notinalllowmapandsegdup	INDEL	438268	142262	84612	0.754945	0.838181	0.794388	4
HG003+HG004	NovaSeq	30	TRUE	GT	Octopus	AllTandemRepeatsandHomopolymers	SNV	186180	17933	10770	0.912142	0.945316	0.928433	4
HG003+HG004	NovaSeq	30	TRUE	GT	Octopus	AllTandemRepeatsandHomopolymers	INDEL	311528	45421	45399	0.872752	0.872806	0.872779	4
HG003+HG004	NovaSeq	30	TRUE	GT	GATK4	AllTandemRepeatsandHomopolymers	SNV	178470	25648	19686	0.874347	0.900654	0.887306	4
HG003+HG004	NovaSeq	30	TRUE	GT	GATK4	AllTandemRepeatsandHomopolymers	INDEL	287991	68968	47848	0.80679	0.857527	0.831385	4
HG003+HG004	NovaSeq	30	TRUE	GT	FreeBayes	AllTandemRepeatsandHomopolymers	SNV	173973	30203	17606	0.852074	0.908101	0.879195	4
HG003+HG004	NovaSeq	30	TRUE	GT	FreeBayes	AllTandemRepeatsandHomopolymers	INDEL	251287	105727	51326	0.703858	0.830391	0.761906	4
HG003+HG004	NovaSeq	30	TRUE	GT	Octopus	notinAllTandemRepeatsandHomopolymers	SNV	3911913	294700	227512	0.929944	0.945038	0.93743	4
HG003+HG004	NovaSeq	30	TRUE	GT	Octopus	notinAllTandemRepeatsandHomopolymers	INDEL	226850	16050	14094	0.933923	0.941505	0.937699	4
HG003+HG004	NovaSeq	30	TRUE	GT	GATK4	notinAllTandemRepeatsandHomopolymers	SNV	3689404	517254	384164	0.877039	0.905693	0.891136	4
HG003+HG004	NovaSeq	30	TRUE	GT	GATK4	notinAllTandemRepeatsandHomopolymers	INDEL	213306	29593	22667	0.878167	0.903942	0.890869	4
HG003+HG004	NovaSeq	30	TRUE	GT	FreeBayes	notinAllTandemRepeatsandHomopolymers	SNV	3680390	526292	384318	0.874891	0.90545	0.889908	4
HG003+HG004	NovaSeq	30	TRUE	GT	FreeBayes	notinAllTandemRepeatsandHomopolymers	INDEL	200318	42584	53452	0.824686	0.789368	0.806641	4
HG003+HG004	NovaSeq	40	TRUE	GT	Octopus	genome	SNV	4225604	185110	154747	0.958032	0.964672	0.961341	4
HG003+HG004	NovaSeq	40	TRUE	GT	Octopus	genome	INDEL	559887	39333	40612	0.93436	0.93237	0.933364	4
HG003+HG004	NovaSeq	40	TRUE	GT	GATK4	genome	SNV	4036716	374047	282371	0.915197	0.934623	0.924808	4
HG003+HG004	NovaSeq	40	TRUE	GT	GATK4	genome	INDEL	531599	67626	50436	0.887144	0.913345	0.900054	4
HG003+HG004	NovaSeq	40	TRUE	GT	FreeBayes	genome	SNV	4044699	366157	291166	0.916987	0.932847	0.924849	4
HG003+HG004	NovaSeq	40	TRUE	GT	FreeBayes	genome	INDEL	488564	110725	72037	0.815239	0.8715	0.842432	4
HG003+HG004	NovaSeq	40	TRUE	GT	Octopus	alldifficult	SNV	710526	70376	47454	0.909879	0.937394	0.923431	4
HG003+HG004	NovaSeq	40	TRUE	GT	Octopus	alldifficult	INDEL	362413	32754	34036	0.917114	0.914148	0.915628	4
HG003+HG004	NovaSeq	40	TRUE	GT	GATK4	alldifficult	SNV	654684	126213	68927	0.838374	0.904746	0.870296	4
HG003+HG004	NovaSeq	40	TRUE	GT	GATK4	alldifficult	INDEL	341934	53235	38106	0.865285	0.899732	0.882172	4
HG003+HG004	NovaSeq	40	TRUE	GT	FreeBayes	alldifficult	SNV	673276	107696	69257	0.8621	0.906729	0.883851	4
HG003+HG004	NovaSeq	40	TRUE	GT	FreeBayes	alldifficult	INDEL	308161	87071	49209	0.779696	0.862302	0.818922	4
HG003+HG004	NovaSeq	40	TRUE	GT	Octopus	alllowmapandsegdup	SNV	277316	50955	33290	0.844778	0.892822	0.868136	4
HG003+HG004	NovaSeq	40	TRUE	GT	Octopus	alllowmapandsegdup	INDEL	15593	2952	2003	0.84082	0.886167	0.862898	4
HG003+HG004	NovaSeq	40	TRUE	GT	GATK4	alllowmapandsegdup	SNV	237027	91244	38642	0.722047	0.859825	0.784936	4
HG003+HG004	NovaSeq	40	TRUE	GT	GATK4	alllowmapandsegdup	INDEL	13672	4873	2507	0.737234	0.845046	0.787467	4
HG003+HG004	NovaSeq	40	TRUE	GT	FreeBayes	alllowmapandsegdup	SNV	259674	68603	40321	0.791021	0.865594	0.826629	4
HG003+HG004	NovaSeq	40	TRUE	GT	FreeBayes	alllowmapandsegdup	INDEL	13596	4951	6568	0.733057	0.674271	0.702436	4
HG003+HG004	NovaSeq	40	TRUE	GT	Octopus	notinalldifficult	SNV	3515078	114734	107293	0.968391	0.97038	0.969385	4
HG003+HG004	NovaSeq	40	TRUE	GT	Octopus	notinalldifficult	INDEL	197865	6588	6612	0.967777	0.967664	0.967721	4
HG003+HG004	NovaSeq	40	TRUE	GT	GATK4	notinalldifficult	SNV	3382032	247834	213444	0.931724	0.940635	0.936158	4
HG003+HG004	NovaSeq	40	TRUE	GT	GATK4	notinalldifficult	INDEL	190041	14415	12347	0.929496	0.938993	0.93422	4
HG003+HG004	NovaSeq	40	TRUE	GT	FreeBayes	notinalldifficult	SNV	3371423	258461	221909	0.928796	0.938244	0.933496	4
HG003+HG004	NovaSeq	40	TRUE	GT	FreeBayes	notinalldifficult	INDEL	180752	23705	32044	0.884059	0.849414	0.86639	4
HG003+HG004	NovaSeq	40	TRUE	GT	Octopus	notinalllowmapandsegdup	SNV	3948288	134155	121457	0.967139	0.970156	0.968645	4
HG003+HG004	NovaSeq	40	TRUE	GT	Octopus	notinalllowmapandsegdup	INDEL	544086	36372	38623	0.937339	0.933718	0.935525	4
HG003+HG004	NovaSeq	40	TRUE	GT	GATK4	notinalllowmapandsegdup	SNV	3799689	282803	243729	0.930728	0.939722	0.935203	4
HG003+HG004	NovaSeq	40	TRUE	GT	GATK4	notinalllowmapandsegdup	INDEL	517727	62736	47910	0.891921	0.915299	0.903459	4
HG003+HG004	NovaSeq	40	TRUE	GT	FreeBayes	notinalllowmapandsegdup	SNV	3785025	297554	250845	0.927116	0.937846	0.93245	4
HG003+HG004	NovaSeq	40	TRUE	GT	FreeBayes	notinalllowmapandsegdup	INDEL	474784	105741	65662	0.817853	0.878504	0.847094	4
HG003+HG004	NovaSeq	40	TRUE	GT	Octopus	AllTandemRepeatsandHomopolymers	SNV	193190	10926	6794	0.946472	0.966027	0.956149	4
HG003+HG004	NovaSeq	40	TRUE	GT	Octopus	AllTandemRepeatsandHomopolymers	INDEL	327533	29411	31628	0.917603	0.911939	0.914762	4
HG003+HG004	NovaSeq	40	TRUE	GT	GATK4	AllTandemRepeatsandHomopolymers	SNV	187084	17025	13711	0.916589	0.931716	0.924091	4
HG003+HG004	NovaSeq	40	TRUE	GT	GATK4	AllTandemRepeatsandHomopolymers	INDEL	309645	47303	34251	0.867479	0.900403	0.883635	4
HG003+HG004	NovaSeq	40	TRUE	GT	FreeBayes	AllTandemRepeatsandHomopolymers	SNV	183803	20371	12995	0.900227	0.933968	0.916787	4
HG003+HG004	NovaSeq	40	TRUE	GT	FreeBayes	AllTandemRepeatsandHomopolymers	INDEL	276833	80176	39998	0.775423	0.873756	0.821658	4
HG003+HG004	NovaSeq	40	TRUE	GT	Octopus	notinAllTandemRepeatsandHomopolymers	SNV	4032414	174184	147953	0.958593	0.964608	0.961591	4
HG003+HG004	NovaSeq	40	TRUE	GT	Octopus	notinAllTandemRepeatsandHomopolymers	INDEL	232957	9941	9014	0.959073	0.962748	0.960907	4
HG003+HG004	NovaSeq	40	TRUE	GT	GATK4	notinAllTandemRepeatsandHomopolymers	SNV	3849632	357022	268660	0.915129	0.934764	0.924843	4
HG003+HG004	NovaSeq	40	TRUE	GT	GATK4	notinAllTandemRepeatsandHomopolymers	INDEL	222531	20368	16215	0.916146	0.932083	0.924046	4
HG003+HG004	NovaSeq	40	TRUE	GT	FreeBayes	notinAllTandemRepeatsandHomopolymers	SNV	3860896	345786	278171	0.917801	0.932794	0.925237	4
HG003+HG004	NovaSeq	40	TRUE	GT	FreeBayes	notinAllTandemRepeatsandHomopolymers	INDEL	212261	30641	42020	0.873854	0.83475	0.853855	4
HG003+HG004	NovaSeq	50	TRUE	GT	Octopus	genome	SNV	4282474	128229	110074	0.970928	0.974941	0.97293	4
HG003+HG004	NovaSeq	50	TRUE	GT	Octopus	genome	INDEL	571689	27526	29633	0.954063	0.95072	0.952389	4
HG003+HG004	NovaSeq	50	TRUE	GT	GATK4	genome	SNV	4132996	277760	206630	0.937027	0.952385	0.944644	4
HG003+HG004	NovaSeq	50	TRUE	GT	GATK4	genome	INDEL	549176	50039	37680	0.916492	0.935793	0.926042	4
HG003+HG004	NovaSeq	50	TRUE	GT	FreeBayes	genome	SNV	4146353	264505	221773	0.940033	0.949229	0.944609	4
HG003+HG004	NovaSeq	50	TRUE	GT	FreeBayes	genome	INDEL	511926	87368	59785	0.854215	0.895428	0.874336	4
HG003+HG004	NovaSeq	50	TRUE	GT	Octopus	alldifficult	SNV	722465	58431	41428	0.925174	0.945767	0.935358	4
HG003+HG004	NovaSeq	50	TRUE	GT	Octopus	alldifficult	INDEL	371745	23416	25378	0.940743	0.936095	0.938413	4
HG003+HG004	NovaSeq	50	TRUE	GT	GATK4	alldifficult	SNV	670816	110074	56669	0.85904	0.922103	0.889455	4
HG003+HG004	NovaSeq	50	TRUE	GT	GATK4	alldifficult	INDEL	354921	40238	28946	0.898173	0.924594	0.911192	4
HG003+HG004	NovaSeq	50	TRUE	GT	FreeBayes	alldifficult	SNV	692373	88601	59686	0.886551	0.920637	0.903272	4
HG003+HG004	NovaSeq	50	TRUE	GT	FreeBayes	alldifficult	INDEL	325939	69298	41465	0.824667	0.887141	0.854764	4
HG003+HG004	NovaSeq	50	TRUE	GT	Octopus	alllowmapandsegdup	SNV	283073	45198	31998	0.862315	0.898442	0.880008	4
HG003+HG004	NovaSeq	50	TRUE	GT	Octopus	alllowmapandsegdup	INDEL	15915	2630	1958	0.858183	0.890449	0.874018	4
HG003+HG004	NovaSeq	50	TRUE	GT	GATK4	alllowmapandsegdup	SNV	243091	85178	34354	0.740524	0.876177	0.802659	4
HG003+HG004	NovaSeq	50	TRUE	GT	GATK4	alllowmapandsegdup	INDEL	13980	4563	2280	0.753923	0.859779	0.803379	4
HG003+HG004	NovaSeq	50	TRUE	GT	FreeBayes	alllowmapandsegdup	SNV	267509	60768	37625	0.814888	0.876694	0.844662	4
HG003+HG004	NovaSeq	50	TRUE	GT	FreeBayes	alllowmapandsegdup	INDEL	14122	4425	6353	0.761417	0.689719	0.723797	4
HG003+HG004	NovaSeq	50	TRUE	GT	Octopus	notinalldifficult	SNV	3560009	69798	68646	0.980771	0.981082	0.980927	4
HG003+HG004	NovaSeq	50	TRUE	GT	Octopus	notinalldifficult	INDEL	200331	4123	4297	0.979834	0.979001	0.979417	4
HG003+HG004	NovaSeq	50	TRUE	GT	GATK4	notinalldifficult	SNV	3462180	167686	149961	0.953804	0.958484	0.956138	4
HG003+HG004	NovaSeq	50	TRUE	GT	GATK4	notinalldifficult	INDEL	194633	9822	8744	0.95196	0.957006	0.954476	4
HG003+HG004	NovaSeq	50	TRUE	GT	FreeBayes	notinalldifficult	SNV	3453980	175904	162087	0.95154	0.955176	0.953355	4
HG003+HG004	NovaSeq	50	TRUE	GT	FreeBayes	notinalldifficult	INDEL	186363	18094	25398	0.911502	0.880063	0.895507	4
HG003+HG004	NovaSeq	50	TRUE	GT	Octopus	notinalllowmapandsegdup	SNV	3999401	83031	78076	0.979661	0.980852	0.980256	4
HG003+HG004	NovaSeq	50	TRUE	GT	Octopus	notinalllowmapandsegdup	INDEL	555563	24890	27696	0.95712	0.952515	0.954812	4
HG003+HG004	NovaSeq	50	TRUE	GT	GATK4	notinalllowmapandsegdup	SNV	3889905	192582	172276	0.952827	0.95759	0.955203	4
HG003+HG004	NovaSeq	50	TRUE	GT	GATK4	notinalllowmapandsegdup	INDEL	534995	45460	35384	0.921682	0.937964	0.929752	4
HG003+HG004	NovaSeq	50	TRUE	GT	FreeBayes	notinalllowmapandsegdup	SNV	3878844	203737	184148	0.950096	0.954677	0.952381	4
HG003+HG004	NovaSeq	50	TRUE	GT	FreeBayes	notinalllowmapandsegdup	INDEL	497617	82913	53610	0.857177	0.902744	0.879371	4
HG003+HG004	NovaSeq	50	TRUE	GT	Octopus	AllTandemRepeatsandHomopolymers	SNV	196402	7712	4668	0.962217	0.976784	0.969446	4
HG003+HG004	NovaSeq	50	TRUE	GT	Octopus	AllTandemRepeatsandHomopolymers	INDEL	336304	20636	23249	0.942186	0.935339	0.93875	4
HG003+HG004	NovaSeq	50	TRUE	GT	GATK4	AllTandemRepeatsandHomopolymers	SNV	191908	12194	9981	0.940255	0.950562	0.945381	4
HG003+HG004	NovaSeq	50	TRUE	GT	GATK4	AllTandemRepeatsandHomopolymers	INDEL	321832	35106	25744	0.901647	0.925933	0.913628	4
HG003+HG004	NovaSeq	50	TRUE	GT	FreeBayes	AllTandemRepeatsandHomopolymers	SNV	189507	14669	9988	0.928155	0.949934	0.938918	4
HG003+HG004	NovaSeq	50	TRUE	GT	FreeBayes	AllTandemRepeatsandHomopolymers	INDEL	293584	63430	32839	0.822332	0.899397	0.85914	4
HG003+HG004	NovaSeq	50	TRUE	GT	Octopus	notinAllTandemRepeatsandHomopolymers	SNV	4086072	120517	105406	0.97135	0.974852	0.973098	4
HG003+HG004	NovaSeq	50	TRUE	GT	Octopus	notinAllTandemRepeatsandHomopolymers	INDEL	235986	6911	6418	0.971548	0.973524	0.972535	4
HG003+HG004	NovaSeq	50	TRUE	GT	GATK4	notinAllTandemRepeatsandHomopolymers	SNV	3941088	265566	196649	0.93687	0.952474	0.944608	4
HG003+HG004	NovaSeq	50	TRUE	GT	GATK4	notinAllTandemRepeatsandHomopolymers	INDEL	227921	14977	11962	0.93834	0.950134	0.9442	4
HG003+HG004	NovaSeq	50	TRUE	GT	FreeBayes	notinAllTandemRepeatsandHomopolymers	SNV	3956846	249836	211785	0.94061	0.949196	0.944883	4
HG003+HG004	NovaSeq	50	TRUE	GT	FreeBayes	notinAllTandemRepeatsandHomopolymers	INDEL	218901	24001	34606	0.901191	0.863491	0.881938	4
HG003+HG004	NovaSeq	60	TRUE	GT	Octopus	genome	SNV	4313503	97200	84836	0.977963	0.980712	0.979335	4
HG003+HG004	NovaSeq	60	TRUE	GT	Octopus	genome	INDEL	578322	20888	23119	0.965141	0.961561	0.963347	4
HG003+HG004	NovaSeq	60	TRUE	GT	GATK4	genome	SNV	4193960	216798	156044	0.950848	0.964128	0.957442	4
HG003+HG004	NovaSeq	60	TRUE	GT	GATK4	genome	INDEL	560683	38532	28868	0.935696	0.951034	0.943303	4
HG003+HG004	NovaSeq	60	TRUE	GT	FreeBayes	genome	SNV	4206522	204342	174910	0.953673	0.960079	0.956865	4
HG003+HG004	NovaSeq	60	TRUE	GT	FreeBayes	genome	INDEL	526410	72883	51296	0.878385	0.911207	0.894495	4
HG003+HG004	NovaSeq	60	TRUE	GT	Octopus	alldifficult	SNV	729239	51656	38601	0.93385	0.949728	0.941722	4
HG003+HG004	NovaSeq	60	TRUE	GT	Octopus	alldifficult	INDEL	377003	18154	20168	0.954059	0.949221	0.951634	4
HG003+HG004	NovaSeq	60	TRUE	GT	GATK4	alldifficult	SNV	681662	99230	48063	0.872927	0.934135	0.902495	4
HG003+HG004	NovaSeq	60	TRUE	GT	GATK4	alldifficult	INDEL	363770	31389	22367	0.920566	0.942075	0.931196	4
HG003+HG004	NovaSeq	60	TRUE	GT	FreeBayes	alldifficult	SNV	703834	77145	53010	0.90122	0.929959	0.915364	4
HG003+HG004	NovaSeq	60	TRUE	GT	FreeBayes	alldifficult	INDEL	337174	58061	35851	0.853098	0.903891	0.87776	4
HG003+HG004	NovaSeq	60	TRUE	GT	Octopus	alllowmapandsegdup	SNV	286383	41888	31743	0.872398	0.900219	0.88609	4
HG003+HG004	NovaSeq	60	TRUE	GT	Octopus	alllowmapandsegdup	INDEL	16106	2439	1927	0.868482	0.89314	0.880639	4
HG003+HG004	NovaSeq	60	TRUE	GT	GATK4	alllowmapandsegdup	SNV	247187	81082	31245	0.753001	0.887782	0.814856	4
HG003+HG004	NovaSeq	60	TRUE	GT	GATK4	alllowmapandsegdup	INDEL	14234	4309	2083	0.767621	0.872342	0.816638	4
HG003+HG004	NovaSeq	60	TRUE	GT	FreeBayes	alllowmapandsegdup	SNV	272412	55865	35570	0.829824	0.884506	0.856293	4
HG003+HG004	NovaSeq	60	TRUE	GT	FreeBayes	alllowmapandsegdup	INDEL	14437	4110	6221	0.778401	0.698858	0.736488	4
HG003+HG004	NovaSeq	60	TRUE	GT	Octopus	notinalldifficult	SNV	3584264	45544	46235	0.987453	0.987265	0.987359	4
HG003+HG004	NovaSeq	60	TRUE	GT	Octopus	notinalldifficult	INDEL	201706	2747	2995	0.986564	0.985369	0.985966	4
HG003+HG004	NovaSeq	60	TRUE	GT	GATK4	notinalldifficult	SNV	3512298	117568	107981	0.967611	0.970173	0.96889	4
HG003+HG004	NovaSeq	60	TRUE	GT	GATK4	notinalldifficult	INDEL	197298	7157	6511	0.964995	0.968053	0.966522	4
HG003+HG004	NovaSeq	60	TRUE	GT	FreeBayes	notinalldifficult	SNV	3502688	127197	121900	0.964958	0.966369	0.965663	4
HG003+HG004	NovaSeq	60	TRUE	GT	FreeBayes	notinalldifficult	INDEL	189615	14843	21248	0.927403	0.899233	0.913101	4
HG003+HG004	NovaSeq	60	TRUE	GT	Octopus	notinalllowmapandsegdup	SNV	4027120	55312	53093	0.986451	0.986988	0.986719	4
HG003+HG004	NovaSeq	60	TRUE	GT	Octopus	notinalllowmapandsegdup	INDEL	562002	18446	21213	0.968221	0.963627	0.965919	4
HG003+HG004	NovaSeq	60	TRUE	GT	GATK4	notinalllowmapandsegdup	SNV	3946773	135716	124799	0.966757	0.969349	0.968051	4
HG003+HG004	NovaSeq	60	TRUE	GT	GATK4	notinalllowmapandsegdup	INDEL	546243	34212	26771	0.94106	0.95328	0.947131	4
HG003+HG004	NovaSeq	60	TRUE	GT	FreeBayes	notinalllowmapandsegdup	SNV	3934110	148477	139340	0.963632	0.965793	0.964711	4
HG003+HG004	NovaSeq	60	TRUE	GT	FreeBayes	notinalllowmapandsegdup	INDEL	511777	68752	45236	0.88157	0.918788	0.899794	4
HG003+HG004	NovaSeq	60	TRUE	GT	Octopus	AllTandemRepeatsandHomopolymers	SNV	198236	5877	3476	0.971207	0.982768	0.976953	4
HG003+HG004	NovaSeq	60	TRUE	GT	Octopus	AllTandemRepeatsandHomopolymers	INDEL	341280	15656	18157	0.956138	0.949485	0.9528	4
HG003+HG004	NovaSeq	60	TRUE	GT	GATK4	AllTandemRepeatsandHomopolymers	SNV	195170	8934	7379	0.956228	0.963569	0.959885	4
HG003+HG004	NovaSeq	60	TRUE	GT	GATK4	AllTandemRepeatsandHomopolymers	INDEL	330180	26758	19581	0.925035	0.944016	0.934429	4
HG003+HG004	NovaSeq	60	TRUE	GT	FreeBayes	AllTandemRepeatsandHomopolymers	SNV	192773	11407	8040	0.944133	0.959963	0.951982	4
HG003+HG004	NovaSeq	60	TRUE	GT	FreeBayes	AllTandemRepeatsandHomopolymers	INDEL	304108	52904	27659	0.851815	0.916631	0.883035	4
HG003+HG004	NovaSeq	60	TRUE	GT	Octopus	notinAllTandemRepeatsandHomopolymers	SNV	4115267	91323	81360	0.97829	0.980613	0.97945	4
HG003+HG004	NovaSeq	60	TRUE	GT	Octopus	notinAllTandemRepeatsandHomopolymers	INDEL	237645	5251	4997	0.978382	0.979406	0.978894	4
HG003+HG004	NovaSeq	60	TRUE	GT	GATK4	notinAllTandemRepeatsandHomopolymers	SNV	3998790	207864	148665	0.950587	0.964155	0.957323	4
HG003+HG004	NovaSeq	60	TRUE	GT	GATK4	notinAllTandemRepeatsandHomopolymers	INDEL	231092	11806	9310	0.951395	0.961273	0.956309	4
HG003+HG004	NovaSeq	60	TRUE	GT	FreeBayes	notinAllTandemRepeatsandHomopolymers	SNV	4013749	192935	166870	0.954136	0.960085	0.957101	4
HG003+HG004	NovaSeq	60	TRUE	GT	FreeBayes	notinAllTandemRepeatsandHomopolymers	INDEL	222874	20029	29901	0.917543	0.881709	0.899269	4
HG003+HG004	NovaSeq	70	TRUE	GT	Octopus	genome	SNV	4332048	78669	69681	0.982164	0.98417	0.983166	4
HG003+HG004	NovaSeq	70	TRUE	GT	Octopus	genome	INDEL	582479	16730	18864	0.97208	0.96863	0.970352	4
HG003+HG004	NovaSeq	70	TRUE	GT	GATK4	genome	SNV	4233539	177219	121802	0.959821	0.972034	0.965889	4
HG003+HG004	NovaSeq	70	TRUE	GT	GATK4	genome	INDEL	568399	30812	22985	0.948579	0.961134	0.954815	4
HG003+HG004	NovaSeq	70	TRUE	GT	FreeBayes	genome	SNV	4245722	165142	143000	0.96256	0.967416	0.964982	4
HG003+HG004	NovaSeq	70	TRUE	GT	FreeBayes	genome	INDEL	536349	62944	45183	0.89497	0.922304	0.908431	4
HG003+HG004	NovaSeq	70	TRUE	GT	Octopus	alldifficult	SNV	733386	47509	36982	0.939161	0.951994	0.945534	4
HG003+HG004	NovaSeq	70	TRUE	GT	Octopus	alldifficult	INDEL	380340	14815	16724	0.962508	0.957881	0.960189	4
HG003+HG004	NovaSeq	70	TRUE	GT	GATK4	alldifficult	SNV	688222	92670	42560	0.881328	0.941761	0.910543	4
HG003+HG004	NovaSeq	70	TRUE	GT	GATK4	alldifficult	INDEL	369524	25631	18133	0.935137	0.953224	0.944094	4
HG003+HG004	NovaSeq	70	TRUE	GT	FreeBayes	alldifficult	SNV	711464	69515	48539	0.91099	0.936133	0.92339	4
HG003+HG004	NovaSeq	70	TRUE	GT	FreeBayes	alldifficult	INDEL	344953	50282	31806	0.872779	0.91558	0.893668	4
HG003+HG004	NovaSeq	70	TRUE	GT	Octopus	alllowmapandsegdup	SNV	288449	39822	31752	0.878692	0.900837	0.889627	4
HG003+HG004	NovaSeq	70	TRUE	GT	Octopus	alllowmapandsegdup	INDEL	16232	2313	1924	0.875276	0.89403	0.884554	4
HG003+HG004	NovaSeq	70	TRUE	GT	GATK4	alllowmapandsegdup	SNV	249729	78540	29111	0.760745	0.8956	0.822683	4
HG003+HG004	NovaSeq	70	TRUE	GT	GATK4	alllowmapandsegdup	INDEL	14416	4127	1926	0.777436	0.882144	0.826487	4
HG003+HG004	NovaSeq	70	TRUE	GT	FreeBayes	alllowmapandsegdup	SNV	275901	52376	34186	0.840452	0.889754	0.8644	4
HG003+HG004	NovaSeq	70	TRUE	GT	FreeBayes	alllowmapandsegdup	INDEL	14685	3862	6131	0.791772	0.705467	0.746132	4
HG003+HG004	NovaSeq	70	TRUE	GT	Octopus	notinalldifficult	SNV	3598662	31160	32699	0.991416	0.990995	0.991205	4
HG003+HG004	NovaSeq	70	TRUE	GT	Octopus	notinalldifficult	INDEL	202532	1922	2174	0.990599	0.98938	0.989989	4
HG003+HG004	NovaSeq	70	TRUE	GT	GATK4	notinalldifficult	SNV	3545317	84549	79242	0.976707	0.978137	0.977422	4
HG003+HG004	NovaSeq	70	TRUE	GT	GATK4	notinalldifficult	INDEL	199267	5188	4863	0.974625	0.976177	0.9754	4
HG003+HG004	NovaSeq	70	TRUE	GT	FreeBayes	notinalldifficult	SNV	3534258	95627	94461	0.973656	0.973968	0.973812	4
HG003+HG004	NovaSeq	70	TRUE	GT	FreeBayes	notinalldifficult	INDEL	191779	12679	18129	0.937987	0.913634	0.92565	4
HG003+HG004	NovaSeq	70	TRUE	GT	Octopus	notinalllowmapandsegdup	SNV	4043599	38847	37929	0.990484	0.990707	0.990596	4
HG003+HG004	NovaSeq	70	TRUE	GT	Octopus	notinalllowmapandsegdup	INDEL	566029	14418	16965	0.975161	0.9709	0.973026	4
HG003+HG004	NovaSeq	70	TRUE	GT	GATK4	notinalllowmapandsegdup	SNV	3983810	98679	92691	0.975829	0.977262	0.976545	4
HG003+HG004	NovaSeq	70	TRUE	GT	GATK4	notinalllowmapandsegdup	INDEL	553778	26673	21045	0.954048	0.963389	0.958696	4
HG003+HG004	NovaSeq	70	TRUE	GT	FreeBayes	notinalllowmapandsegdup	SNV	3969821	112766	108814	0.972379	0.973321	0.97285	4
HG003+HG004	NovaSeq	70	TRUE	GT	FreeBayes	notinalllowmapandsegdup	INDEL	521466	59063	39208	0.89826	0.93007	0.913888	4
HG003+HG004	NovaSeq	70	TRUE	GT	Octopus	AllTandemRepeatsandHomopolymers	SNV	199329	4784	2732	0.976562	0.986479	0.981496	4
HG003+HG004	NovaSeq	70	TRUE	GT	Octopus	AllTandemRepeatsandHomopolymers	INDEL	344413	12521	14787	0.964921	0.958834	0.961867	4
HG003+HG004	NovaSeq	70	TRUE	GT	GATK4	AllTandemRepeatsandHomopolymers	SNV	197112	6992	5755	0.965743	0.971632	0.968678	4
HG003+HG004	NovaSeq	70	TRUE	GT	GATK4	AllTandemRepeatsandHomopolymers	INDEL	335599	21335	15634	0.940227	0.955488	0.947796	4
HG003+HG004	NovaSeq	70	TRUE	GT	FreeBayes	AllTandemRepeatsandHomopolymers	SNV	194816	9364	6754	0.954139	0.966493	0.960276	4
HG003+HG004	NovaSeq	70	TRUE	GT	FreeBayes	AllTandemRepeatsandHomopolymers	INDEL	311452	45560	23927	0.872385	0.928657	0.899642	4
HG003+HG004	NovaSeq	70	TRUE	GT	Octopus	notinAllTandemRepeatsandHomopolymers	SNV	4132719	73885	66949	0.982436	0.984059	0.983247	4
HG003+HG004	NovaSeq	70	TRUE	GT	Octopus	notinAllTandemRepeatsandHomopolymers	INDEL	238676	4221	4102	0.982622	0.983104	0.982863	4
HG003+HG004	NovaSeq	70	TRUE	GT	GATK4	notinAllTandemRepeatsandHomopolymers	SNV	4036427	170227	116047	0.959534	0.972054	0.965753	4
HG003+HG004	NovaSeq	70	TRUE	GT	GATK4	notinAllTandemRepeatsandHomopolymers	INDEL	233394	9504	7374	0.960872	0.969373	0.965104	4
HG003+HG004	NovaSeq	70	TRUE	GT	FreeBayes	notinAllTandemRepeatsandHomopolymers	SNV	4050906	155778	136246	0.962969	0.967461	0.96521	4
HG003+HG004	NovaSeq	70	TRUE	GT	FreeBayes	notinAllTandemRepeatsandHomopolymers	INDEL	225474	17429	26383	0.928247	0.895246	0.911448	4
HG002	NovaSeq	10	TRUE	GT	Octopus	genome	SNV	3028396	336731	21334	0.899935	0.993005	0.944182	2
HG002	NovaSeq	10	TRUE	GT	Octopus	genome	INDEL	450653	74744	16554	0.857738	0.964568	0.908022	2
HG002	NovaSeq	10	TRUE	GT	GATK4	genome	SNV	3065482	299645	45546	0.910956	0.98536	0.946698	2
HG002	NovaSeq	10	TRUE	GT	GATK4	genome	INDEL	435695	89702	17382	0.829268	0.961636	0.89056	2
HG002	NovaSeq	10	TRUE	GT	FreeBayes	genome	SNV	2944376	420751	45458	0.874967	0.984796	0.926639	2
HG002	NovaSeq	10	TRUE	GT	FreeBayes	genome	INDEL	378507	146890	21127	0.720421	0.947134	0.818366	2
HG002	NovaSeq	10	TRUE	GT	Octopus	alldifficult	SNV	528628	99335	9063	0.841814	0.983145	0.907007	2
HG002	NovaSeq	10	TRUE	GT	Octopus	alldifficult	INDEL	307691	60958	15682	0.834645	0.951505	0.889252	2
HG002	NovaSeq	10	TRUE	GT	GATK4	alldifficult	SNV	518354	109609	17118	0.825453	0.968032	0.891075	2
HG002	NovaSeq	10	TRUE	GT	GATK4	alldifficult	INDEL	290994	77655	15561	0.789352	0.949239	0.861944	2
HG002	NovaSeq	10	TRUE	GT	FreeBayes	alldifficult	SNV	511182	116781	15448	0.814032	0.970666	0.885476	2
HG002	NovaSeq	10	TRUE	GT	FreeBayes	alldifficult	INDEL	248487	120162	16763	0.674048	0.936803	0.783996	2
HG002	NovaSeq	10	TRUE	GT	Octopus	alllowmapandsegdup	SNV	199317	59878	6559	0.768985	0.968141	0.857147	2
HG002	NovaSeq	10	TRUE	GT	Octopus	alllowmapandsegdup	INDEL	13408	4106	608	0.765559	0.956621	0.850492	2
HG002	NovaSeq	10	TRUE	GT	GATK4	alllowmapandsegdup	SNV	181244	77951	11981	0.699257	0.937995	0.80122	2
HG002	NovaSeq	10	TRUE	GT	GATK4	alllowmapandsegdup	INDEL	12363	5151	989	0.705892	0.925929	0.801076	2
HG002	NovaSeq	10	TRUE	GT	FreeBayes	alllowmapandsegdup	SNV	190629	68566	9911	0.735466	0.950578	0.829299	2
HG002	NovaSeq	10	TRUE	GT	FreeBayes	alllowmapandsegdup	INDEL	11578	5936	2333	0.661071	0.832291	0.736866	2
HG002	NovaSeq	10	TRUE	GT	Octopus	notinalldifficult	SNV	2499768	237396	12271	0.913269	0.995115	0.952437	2
HG002	NovaSeq	10	TRUE	GT	Octopus	notinalldifficult	INDEL	143111	13820	875	0.911936	0.993923	0.951166	2
HG002	NovaSeq	10	TRUE	GT	GATK4	notinalldifficult	SNV	2547128	190036	28428	0.930572	0.988962	0.958879	2
HG002	NovaSeq	10	TRUE	GT	GATK4	notinalldifficult	INDEL	144862	12069	1828	0.923094	0.987538	0.954229	2
HG002	NovaSeq	10	TRUE	GT	FreeBayes	notinalldifficult	SNV	2433194	303970	30010	0.888947	0.987817	0.935778	2
HG002	NovaSeq	10	TRUE	GT	FreeBayes	notinalldifficult	INDEL	130117	26814	7751	0.829135	0.94378	0.882751	2
HG002	NovaSeq	10	TRUE	GT	Octopus	notinalllowmapandsegdup	SNV	2829079	276853	14775	0.910863	0.994805	0.950985	2
HG002	NovaSeq	10	TRUE	GT	Octopus	notinalllowmapandsegdup	INDEL	437058	70623	15941	0.860891	0.96481	0.909893	2
HG002	NovaSeq	10	TRUE	GT	GATK4	notinalllowmapandsegdup	SNV	2884238	221694	33565	0.928622	0.988496	0.957624	2
HG002	NovaSeq	10	TRUE	GT	GATK4	notinalllowmapandsegdup	INDEL	423146	84535	16389	0.833488	0.962713	0.893452	2
HG002	NovaSeq	10	TRUE	GT	FreeBayes	notinalllowmapandsegdup	SNV	2753747	352185	35547	0.886609	0.987256	0.934229	2
HG002	NovaSeq	10	TRUE	GT	FreeBayes	notinalllowmapandsegdup	INDEL	366756	140925	18880	0.722414	0.951042	0.821111	2
HG002	NovaSeq	10	TRUE	GT	Octopus	AllTandemRepeatsandHomopolymers	SNV	160440	22466	1703	0.877172	0.989497	0.929955	2
HG002	NovaSeq	10	TRUE	GT	Octopus	AllTandemRepeatsandHomopolymers	INDEL	282590	56286	15219	0.833904	0.948897	0.887692	2
HG002	NovaSeq	10	TRUE	GT	GATK4	AllTandemRepeatsandHomopolymers	SNV	164436	18470	3480	0.899019	0.979275	0.937433	2
HG002	NovaSeq	10	TRUE	GT	GATK4	AllTandemRepeatsandHomopolymers	INDEL	266359	72517	14636	0.786007	0.947914	0.859401	2
HG002	NovaSeq	10	TRUE	GT	FreeBayes	AllTandemRepeatsandHomopolymers	SNV	155247	27659	3924	0.84878	0.975347	0.907673	2
HG002	NovaSeq	10	TRUE	GT	FreeBayes	AllTandemRepeatsandHomopolymers	INDEL	225894	112982	14342	0.666598	0.9403	0.780139	2
HG002	NovaSeq	10	TRUE	GT	Octopus	notinAllTandemRepeatsandHomopolymers	SNV	2867956	314265	19631	0.901244	0.993202	0.944991	2
HG002	NovaSeq	10	TRUE	GT	Octopus	notinAllTandemRepeatsandHomopolymers	INDEL	168402	18536	1339	0.900844	0.992112	0.944278	2
HG002	NovaSeq	10	TRUE	GT	GATK4	notinAllTandemRepeatsandHomopolymers	SNV	2901046	281175	42066	0.911642	0.985707	0.947229	2
HG002	NovaSeq	10	TRUE	GT	GATK4	notinAllTandemRepeatsandHomopolymers	INDEL	169689	17249	2755	0.907729	0.984024	0.944338	2
HG002	NovaSeq	10	TRUE	GT	FreeBayes	notinAllTandemRepeatsandHomopolymers	SNV	2789129	393092	41534	0.876472	0.985327	0.927718	2
HG002	NovaSeq	10	TRUE	GT	FreeBayes	notinAllTandemRepeatsandHomopolymers	INDEL	152874	34064	10455	0.817779	0.935988	0.8729	2
HG002	NovaSeq	20	TRUE	GT	Octopus	genome	SNV	3259919	105208	8626	0.968736	0.997361	0.98284	2
HG002	NovaSeq	20	TRUE	GT	Octopus	genome	INDEL	503333	22064	4380	0.958005	0.991373	0.974404	2
HG002	NovaSeq	20	TRUE	GT	GATK4	genome	SNV	3265217	99910	20744	0.97031	0.993687	0.98186	2
HG002	NovaSeq	20	TRUE	GT	GATK4	genome	INDEL	500955	24442	5898	0.953479	0.988363	0.970608	2
HG002	NovaSeq	20	TRUE	GT	FreeBayes	genome	SNV	3285287	79840	15896	0.976274	0.995185	0.985639	2
HG002	NovaSeq	20	TRUE	GT	FreeBayes	genome	INDEL	469498	55899	12456	0.893606	0.974155	0.932144	2
HG002	NovaSeq	20	TRUE	GT	Octopus	alldifficult	SNV	580196	47767	7845	0.923933	0.986659	0.954267	2
HG002	NovaSeq	20	TRUE	GT	Octopus	alldifficult	INDEL	350140	18509	4255	0.949792	0.987994	0.968516	2
HG002	NovaSeq	20	TRUE	GT	GATK4	alldifficult	SNV	558138	69825	14295	0.888807	0.975028	0.929923	2
HG002	NovaSeq	20	TRUE	GT	GATK4	alldifficult	INDEL	346495	22154	5202	0.939905	0.985209	0.962024	2
HG002	NovaSeq	20	TRUE	GT	FreeBayes	alldifficult	SNV	580948	47015	11638	0.925131	0.980361	0.951945	2
HG002	NovaSeq	20	TRUE	GT	FreeBayes	alldifficult	INDEL	319913	48736	9967	0.867798	0.969786	0.915962	2
HG002	NovaSeq	20	TRUE	GT	Octopus	alllowmapandsegdup	SNV	222541	36654	7408	0.858585	0.967784	0.90992	2
HG002	NovaSeq	20	TRUE	GT	Octopus	alllowmapandsegdup	INDEL	15058	2456	545	0.859769	0.965071	0.909382	2
HG002	NovaSeq	20	TRUE	GT	GATK4	alllowmapandsegdup	SNV	196494	62701	12632	0.758093	0.939596	0.839142	2
HG002	NovaSeq	20	TRUE	GT	GATK4	alllowmapandsegdup	INDEL	13863	3651	1029	0.791538	0.930902	0.855582	2
HG002	NovaSeq	20	TRUE	GT	FreeBayes	alllowmapandsegdup	SNV	221151	38044	9549	0.853222	0.958609	0.902851	2
HG002	NovaSeq	20	TRUE	GT	FreeBayes	alllowmapandsegdup	INDEL	14059	3455	2436	0.802729	0.852319	0.826781	2
HG002	NovaSeq	20	TRUE	GT	Octopus	notinalldifficult	SNV	2679723	57441	781	0.979014	0.999709	0.989253	2
HG002	NovaSeq	20	TRUE	GT	Octopus	notinalldifficult	INDEL	153371	3560	127	0.977315	0.999173	0.988123	2
HG002	NovaSeq	20	TRUE	GT	GATK4	notinalldifficult	SNV	2707079	30085	6449	0.989009	0.997623	0.993297	2
HG002	NovaSeq	20	TRUE	GT	GATK4	notinalldifficult	INDEL	154647	2284	694	0.985446	0.995532	0.990463	2
HG002	NovaSeq	20	TRUE	GT	FreeBayes	notinalldifficult	SNV	2704339	32825	4258	0.988008	0.998428	0.99319	2
HG002	NovaSeq	20	TRUE	GT	FreeBayes	notinalldifficult	INDEL	149784	7147	3854	0.954458	0.974915	0.964578	2
HG002	NovaSeq	20	TRUE	GT	Octopus	notinalllowmapandsegdup	SNV	3037378	68554	1218	0.977928	0.999599	0.988645	2
HG002	NovaSeq	20	TRUE	GT	Octopus	notinalllowmapandsegdup	INDEL	488076	19605	3837	0.961383	0.9922	0.976548	2
HG002	NovaSeq	20	TRUE	GT	GATK4	notinalllowmapandsegdup	SNV	3068723	37209	8112	0.98802	0.997364	0.99267	2
HG002	NovaSeq	20	TRUE	GT	GATK4	notinalllowmapandsegdup	INDEL	486899	20782	4871	0.959065	0.990095	0.974333	2
HG002	NovaSeq	20	TRUE	GT	FreeBayes	notinalllowmapandsegdup	SNV	3064136	41796	6347	0.986543	0.997933	0.992205	2
HG002	NovaSeq	20	TRUE	GT	FreeBayes	notinalllowmapandsegdup	INDEL	455233	52448	10068	0.896691	0.978362	0.935748	2
HG002	NovaSeq	20	TRUE	GT	Octopus	AllTandemRepeatsandHomopolymers	SNV	176280	6626	514	0.963774	0.997093	0.98015	2
HG002	NovaSeq	20	TRUE	GT	Octopus	AllTandemRepeatsandHomopolymers	INDEL	322756	16120	3880	0.952431	0.988121	0.969948	2
HG002	NovaSeq	20	TRUE	GT	GATK4	AllTandemRepeatsandHomopolymers	SNV	178224	4682	1528	0.974402	0.991499	0.982876	2
HG002	NovaSeq	20	TRUE	GT	GATK4	AllTandemRepeatsandHomopolymers	INDEL	319929	18947	4300	0.944089	0.986738	0.964942	2
HG002	NovaSeq	20	TRUE	GT	FreeBayes	AllTandemRepeatsandHomopolymers	SNV	176573	6333	2140	0.965376	0.988025	0.976569	2
HG002	NovaSeq	20	TRUE	GT	FreeBayes	AllTandemRepeatsandHomopolymers	INDEL	293492	45384	7540	0.866075	0.974953	0.917294	2
HG002	NovaSeq	20	TRUE	GT	Octopus	notinAllTandemRepeatsandHomopolymers	SNV	3083639	98582	8112	0.969021	0.997376	0.982994	2
HG002	NovaSeq	20	TRUE	GT	Octopus	notinAllTandemRepeatsandHomopolymers	INDEL	180970	5968	505	0.968075	0.997217	0.98243	2
HG002	NovaSeq	20	TRUE	GT	GATK4	notinAllTandemRepeatsandHomopolymers	SNV	3086993	95228	19216	0.970075	0.993814	0.981801	2
HG002	NovaSeq	20	TRUE	GT	GATK4	notinAllTandemRepeatsandHomopolymers	INDEL	181428	5510	1599	0.970525	0.991264	0.980785	2
HG002	NovaSeq	20	TRUE	GT	FreeBayes	notinAllTandemRepeatsandHomopolymers	SNV	3108714	73507	13756	0.976901	0.995595	0.986159	2
HG002	NovaSeq	20	TRUE	GT	FreeBayes	notinAllTandemRepeatsandHomopolymers	INDEL	176407	10531	6394	0.943666	0.965022	0.954224	2
HG002	NovaSeq	30	TRUE	GT	Octopus	genome	SNV	3309961	55166	9061	0.983607	0.99727	0.990391	2
HG002	NovaSeq	30	TRUE	GT	Octopus	genome	INDEL	515553	9844	2362	0.981264	0.995439	0.988301	2
HG002	NovaSeq	30	TRUE	GT	GATK4	genome	SNV	3291984	73143	17342	0.978264	0.99476	0.986443	2
HG002	NovaSeq	30	TRUE	GT	GATK4	genome	INDEL	513273	12124	3311	0.976924	0.993591	0.985187	2
HG002	NovaSeq	30	TRUE	GT	FreeBayes	genome	SNV	3324450	40677	15493	0.987912	0.995361	0.991623	2
HG002	NovaSeq	30	TRUE	GT	FreeBayes	genome	INDEL	492181	33216	10843	0.936779	0.978444	0.957159	2
HG002	NovaSeq	30	TRUE	GT	Octopus	alldifficult	SNV	592614	35349	8429	0.943708	0.985976	0.964379	2
HG002	NovaSeq	30	TRUE	GT	Octopus	alldifficult	INDEL	360086	8563	2242	0.976772	0.993812	0.985218	2
HG002	NovaSeq	30	TRUE	GT	GATK4	alldifficult	SNV	564622	63341	13611	0.899133	0.976461	0.936203	2
HG002	NovaSeq	30	TRUE	GT	GATK4	alldifficult	INDEL	357386	11263	2848	0.969448	0.992094	0.98064	2
HG002	NovaSeq	30	TRUE	GT	FreeBayes	alldifficult	SNV	592661	35302	12155	0.943783	0.979903	0.961504	2
HG002	NovaSeq	30	TRUE	GT	FreeBayes	alldifficult	INDEL	339508	29141	8351	0.920952	0.975993	0.947674	2
HG002	NovaSeq	30	TRUE	GT	Octopus	alllowmapandsegdup	SNV	228938	30257	8126	0.883265	0.965722	0.922655	2
HG002	NovaSeq	30	TRUE	GT	Octopus	alllowmapandsegdup	INDEL	15524	1990	607	0.886377	0.962371	0.922812	2
HG002	NovaSeq	30	TRUE	GT	GATK4	alllowmapandsegdup	SNV	199449	59746	12594	0.769494	0.940606	0.846489	2
HG002	NovaSeq	30	TRUE	GT	GATK4	alllowmapandsegdup	INDEL	14155	3359	1019	0.808211	0.932846	0.866067	2
HG002	NovaSeq	30	TRUE	GT	FreeBayes	alllowmapandsegdup	SNV	227728	31467	10188	0.878597	0.957178	0.916206	2
HG002	NovaSeq	30	TRUE	GT	FreeBayes	alllowmapandsegdup	INDEL	14685	2829	2598	0.838472	0.849679	0.844038	2
HG002	NovaSeq	30	TRUE	GT	Octopus	notinalldifficult	SNV	2717347	19817	632	0.99276	0.999767	0.996251	2
HG002	NovaSeq	30	TRUE	GT	Octopus	notinalldifficult	INDEL	155657	1274	118	0.991882	0.999242	0.995549	2
HG002	NovaSeq	30	TRUE	GT	GATK4	notinalldifficult	SNV	2727362	9802	3731	0.996419	0.998634	0.997525	2
HG002	NovaSeq	30	TRUE	GT	GATK4	notinalldifficult	INDEL	156074	857	462	0.994539	0.997049	0.995792	2
HG002	NovaSeq	30	TRUE	GT	FreeBayes	notinalldifficult	SNV	2731789	5375	3338	0.998036	0.99878	0.998408	2
HG002	NovaSeq	30	TRUE	GT	FreeBayes	notinalldifficult	INDEL	152883	4048	3269	0.974205	0.979065	0.976629	2
HG002	NovaSeq	30	TRUE	GT	Octopus	notinalllowmapandsegdup	SNV	3081023	24909	935	0.99198	0.999697	0.995823	2
HG002	NovaSeq	30	TRUE	GT	Octopus	notinalllowmapandsegdup	INDEL	499827	7854	1756	0.98453	0.996499	0.990478	2
HG002	NovaSeq	30	TRUE	GT	GATK4	notinalllowmapandsegdup	SNV	3092535	13397	4748	0.995687	0.998467	0.997075	2
HG002	NovaSeq	30	TRUE	GT	GATK4	notinalllowmapandsegdup	INDEL	498918	8763	2296	0.982739	0.995419	0.989039	2
HG002	NovaSeq	30	TRUE	GT	FreeBayes	notinalllowmapandsegdup	SNV	3096722	9210	5305	0.997035	0.99829	0.997662	2
HG002	NovaSeq	30	TRUE	GT	FreeBayes	notinalllowmapandsegdup	INDEL	477288	30393	8290	0.940134	0.982928	0.961054	2
HG002	NovaSeq	30	TRUE	GT	Octopus	AllTandemRepeatsandHomopolymers	SNV	179681	3225	451	0.982368	0.997496	0.989874	2
HG002	NovaSeq	30	TRUE	GT	Octopus	AllTandemRepeatsandHomopolymers	INDEL	332066	6810	1776	0.979904	0.99468	0.987237	2
HG002	NovaSeq	30	TRUE	GT	GATK4	AllTandemRepeatsandHomopolymers	SNV	180142	2764	1061	0.984888	0.994145	0.989495	2
HG002	NovaSeq	30	TRUE	GT	GATK4	AllTandemRepeatsandHomopolymers	INDEL	330458	8418	1970	0.975159	0.994074	0.984526	2
HG002	NovaSeq	30	TRUE	GT	FreeBayes	AllTandemRepeatsandHomopolymers	SNV	179690	3216	2086	0.982417	0.988524	0.985461	2
HG002	NovaSeq	30	TRUE	GT	FreeBayes	AllTandemRepeatsandHomopolymers	INDEL	312317	26559	5780	0.921626	0.981829	0.950776	2
HG002	NovaSeq	30	TRUE	GT	Octopus	notinAllTandemRepeatsandHomopolymers	SNV	3130280	51941	8610	0.983678	0.997257	0.990421	2
HG002	NovaSeq	30	TRUE	GT	Octopus	notinAllTandemRepeatsandHomopolymers	INDEL	183900	3038	585	0.983749	0.996829	0.990246	2
HG002	NovaSeq	30	TRUE	GT	GATK4	notinAllTandemRepeatsandHomopolymers	SNV	3111842	70379	16281	0.977884	0.994795	0.986267	2
HG002	NovaSeq	30	TRUE	GT	GATK4	notinAllTandemRepeatsandHomopolymers	INDEL	183220	3718	1341	0.980111	0.992734	0.986382	2
HG002	NovaSeq	30	TRUE	GT	FreeBayes	notinAllTandemRepeatsandHomopolymers	SNV	3144760	37461	13407	0.988228	0.995755	0.991977	2
HG002	NovaSeq	30	TRUE	GT	FreeBayes	notinAllTandemRepeatsandHomopolymers	INDEL	180292	6646	5910	0.964448	0.96826	0.96635	2
HG002+HG003+HG004	NovaSeq	10	FALSE	GT	Octopus	genome	SNV	2140755	2234359	1353870	0.489303	0.612585	0.544047	6
HG002+HG003+HG004	NovaSeq	10	FALSE	GT	Octopus	genome	INDEL	268237	302049	253455	0.470355	0.514167	0.491286	6
HG002+HG003+HG004	NovaSeq	10	FALSE	GT	GATK4	genome	SNV	2155632	2220897	1754900	0.492544	0.551238	0.52024	6
HG002+HG003+HG004	NovaSeq	10	FALSE	GT	GATK4	genome	INDEL	248848	323312	234017	0.434927	0.515357	0.471739	6
HG002+HG003+HG004	NovaSeq	10	FALSE	GT	FreeBayes	genome	SNV	2175698	2202075	2226778	0.496987	0.494199	0.495589	6
HG002+HG003+HG004	NovaSeq	10	FALSE	GT	FreeBayes	genome	INDEL	234876	338254	313586	0.409813	0.428245	0.418826	6
HG002+HG003+HG004	NovaSeq	10	FALSE	GT	Octopus	alldifficult	SNV	350117	411814	233974	0.459513	0.599422	0.520225	6
HG002+HG003+HG004	NovaSeq	10	FALSE	GT	Octopus	alldifficult	INDEL	160001	208276	178566	0.434458	0.472583	0.452719	6
HG002+HG003+HG004	NovaSeq	10	FALSE	GT	GATK4	alldifficult	SNV	351597	410773	313002	0.461189	0.529036	0.492789	6
HG002+HG003+HG004	NovaSeq	10	FALSE	GT	GATK4	alldifficult	INDEL	147234	222851	157467	0.397838	0.483208	0.436387	6
HG002+HG003+HG004	NovaSeq	10	FALSE	GT	FreeBayes	alldifficult	SNV	356877	406232	424654	0.467662	0.456638	0.462084	6
HG002+HG003+HG004	NovaSeq	10	FALSE	GT	FreeBayes	alldifficult	INDEL	138213	232825	185432	0.372504	0.427051	0.397917	6
HG002+HG003+HG004	NovaSeq	10	FALSE	GT	Octopus	alllowmapandsegdup	SNV	134522	183802	98560	0.422595	0.577145	0.487924	6
HG002+HG003+HG004	NovaSeq	10	FALSE	GT	Octopus	alllowmapandsegdup	INDEL	7673	10017	6578	0.433748	0.538418	0.480448	6
HG002+HG003+HG004	NovaSeq	10	FALSE	GT	GATK4	alllowmapandsegdup	SNV	133945	184395	130643	0.420761	0.50624	0.459559	6
HG002+HG003+HG004	NovaSeq	10	FALSE	GT	GATK4	alllowmapandsegdup	INDEL	7106	10605	7271	0.40122	0.494262	0.442907	6
HG002+HG003+HG004	NovaSeq	10	FALSE	GT	FreeBayes	alllowmapandsegdup	SNV	138032	180412	157206	0.433458	0.467528	0.449849	6
HG002+HG003+HG004	NovaSeq	10	FALSE	GT	FreeBayes	alllowmapandsegdup	INDEL	6913	10807	17671	0.390124	0.281199	0.326825	6
HG002+HG003+HG004	NovaSeq	10	FALSE	GT	Octopus	notinalldifficult	SNV	1790638	1822545	1119896	0.495585	0.615227	0.548963	6
HG002+HG003+HG004	NovaSeq	10	FALSE	GT	Octopus	notinalldifficult	INDEL	108344	94056	75023	0.535296	0.590859	0.561707	6
HG002+HG003+HG004	NovaSeq	10	FALSE	GT	GATK4	notinalldifficult	SNV	1804035	1810124	1441898	0.499158	0.555783	0.525951	6
HG002+HG003+HG004	NovaSeq	10	FALSE	GT	GATK4	notinalldifficult	INDEL	101714	100752	76780	0.502376	0.569845	0.533988	6
HG002+HG003+HG004	NovaSeq	10	FALSE	GT	FreeBayes	notinalldifficult	SNV	1818821	1795843	1802124	0.503178	0.502306	0.502742	6
HG002+HG003+HG004	NovaSeq	10	FALSE	GT	FreeBayes	notinalldifficult	INDEL	96726	105757	169072	0.477699	0.363908	0.413111	6
HG002+HG003+HG004	NovaSeq	10	FALSE	GT	Octopus	notinalllowmapandsegdup	SNV	2006233	2050557	1255310	0.494537	0.615118	0.548276	6
HG002+HG003+HG004	NovaSeq	10	FALSE	GT	Octopus	notinalllowmapandsegdup	INDEL	260414	291970	246845	0.471437	0.513375	0.491513	6
HG002+HG003+HG004	NovaSeq	10	FALSE	GT	GATK4	notinalllowmapandsegdup	SNV	2021687	2036502	1624257	0.498175	0.554503	0.524832	6
HG002+HG003+HG004	NovaSeq	10	FALSE	GT	GATK4	notinalllowmapandsegdup	INDEL	241605	312633	226709	0.435923	0.515904	0.472553	6
HG002+HG003+HG004	NovaSeq	10	FALSE	GT	FreeBayes	notinalllowmapandsegdup	SNV	2037666	2021663	2069572	0.501971	0.496116	0.499026	6
HG002+HG003+HG004	NovaSeq	10	FALSE	GT	FreeBayes	notinalllowmapandsegdup	INDEL	227832	327367	296783	0.410361	0.434284	0.421984	6
HG002+HG003+HG004	NovaSeq	10	FALSE	GT	Octopus	AllTandemRepeatsandHomopolymers	SNV	92559	103572	59338	0.471924	0.609354	0.531905	6
HG002+HG003+HG004	NovaSeq	10	FALSE	GT	Octopus	AllTandemRepeatsandHomopolymers	INDEL	141583	189336	165193	0.427848	0.461519	0.444046	6
HG002+HG003+HG004	NovaSeq	10	FALSE	GT	GATK4	AllTandemRepeatsandHomopolymers	SNV	93868	102609	81583	0.477756	0.53501	0.504764	6
HG002+HG003+HG004	NovaSeq	10	FALSE	GT	GATK4	AllTandemRepeatsandHomopolymers	INDEL	130061	202652	142816	0.39091	0.476629	0.429535	6
HG002+HG003+HG004	NovaSeq	10	FALSE	GT	FreeBayes	AllTandemRepeatsandHomopolymers	SNV	93711	103335	129087	0.475579	0.42061	0.446409	6
HG002+HG003+HG004	NovaSeq	10	FALSE	GT	FreeBayes	AllTandemRepeatsandHomopolymers	INDEL	121737	211911	154435	0.364867	0.440801	0.399256	6
HG002+HG003+HG004	NovaSeq	10	FALSE	GT	Octopus	notinAllTandemRepeatsandHomopolymers	SNV	2048196	2130787	1294532	0.490118	0.612732	0.544609	6
HG002+HG003+HG004	NovaSeq	10	FALSE	GT	Octopus	notinAllTandemRepeatsandHomopolymers	INDEL	126883	113085	88439	0.52875	0.589271	0.557372	6
HG002+HG003+HG004	NovaSeq	10	FALSE	GT	GATK4	notinAllTandemRepeatsandHomopolymers	SNV	2061764	2118288	1673317	0.493239	0.552	0.520968	6
HG002+HG003+HG004	NovaSeq	10	FALSE	GT	GATK4	notinAllTandemRepeatsandHomopolymers	INDEL	118995	121053	91490	0.495713	0.565337	0.528241	6
HG002+HG003+HG004	NovaSeq	10	FALSE	GT	FreeBayes	notinAllTandemRepeatsandHomopolymers	SNV	2081987	2098740	2097691	0.497996	0.498121	0.498059	6
HG002+HG003+HG004	NovaSeq	10	FALSE	GT	FreeBayes	notinAllTandemRepeatsandHomopolymers	INDEL	113305	126779	203451	0.471939	0.357704	0.406957	6
HG002+HG003+HG004	NovaSeq	20	FALSE	GT	Octopus	genome	SNV	3017812	1357181	1011562	0.689787	0.748953	0.718153	6
HG002+HG003+HG004	NovaSeq	20	FALSE	GT	Octopus	genome	INDEL	382514	185919	219354	0.672927	0.635545	0.653702	6
HG002+HG003+HG004	NovaSeq	20	FALSE	GT	GATK4	genome	SNV	2943315	1432810	1532099	0.672585	0.657663	0.66504	6
HG002+HG003+HG004	NovaSeq	20	FALSE	GT	GATK4	genome	INDEL	351654	219882	209854	0.615279	0.626267	0.620724	6
HG002+HG003+HG004	NovaSeq	20	FALSE	GT	FreeBayes	genome	SNV	2945748	1431898	2422659	0.672907	0.548719	0.604501	6
HG002+HG003+HG004	NovaSeq	20	FALSE	GT	FreeBayes	genome	INDEL	328207	244634	362605	0.572946	0.475103	0.519457	6
HG002+HG003+HG004	NovaSeq	20	FALSE	GT	Octopus	alldifficult	SNV	497000	264495	187844	0.652664	0.725713	0.687252	6
HG002+HG003+HG004	NovaSeq	20	FALSE	GT	Octopus	alldifficult	INDEL	234348	132048	154196	0.639603	0.603144	0.620839	6
HG002+HG003+HG004	NovaSeq	20	FALSE	GT	GATK4	alldifficult	SNV	483861	278199	300323	0.634938	0.617025	0.625853	6
HG002+HG003+HG004	NovaSeq	20	FALSE	GT	GATK4	alldifficult	INDEL	214199	155269	141850	0.57975	0.6016	0.590473	6
HG002+HG003+HG004	NovaSeq	20	FALSE	GT	FreeBayes	alldifficult	SNV	485873	277119	494648	0.6368	0.495525	0.557349	6
HG002+HG003+HG004	NovaSeq	20	FALSE	GT	FreeBayes	alldifficult	INDEL	198308	172445	198043	0.534879	0.500334	0.51703	6
HG002+HG003+HG004	NovaSeq	20	FALSE	GT	Octopus	alllowmapandsegdup	SNV	191713	126586	86822	0.602305	0.688291	0.642433	6
HG002+HG003+HG004	NovaSeq	20	FALSE	GT	Octopus	alllowmapandsegdup	INDEL	11012	6665	6398	0.622956	0.63251	0.627697	6
HG002+HG003+HG004	NovaSeq	20	FALSE	GT	GATK4	alllowmapandsegdup	SNV	185472	132853	137985	0.58265	0.573405	0.577991	6
HG002+HG003+HG004	NovaSeq	20	FALSE	GT	GATK4	alllowmapandsegdup	INDEL	10050	7656	7603	0.567604	0.569308	0.568455	6
HG002+HG003+HG004	NovaSeq	20	FALSE	GT	FreeBayes	alllowmapandsegdup	SNV	189005	129457	185144	0.593493	0.50516	0.545775	6
HG002+HG003+HG004	NovaSeq	20	FALSE	GT	FreeBayes	alllowmapandsegdup	INDEL	9652	8071	23468	0.544603	0.291425	0.379679	6
HG002+HG003+HG004	NovaSeq	20	FALSE	GT	Octopus	notinalldifficult	SNV	2520812	1092686	823718	0.69761	0.753712	0.724577	6
HG002+HG003+HG004	NovaSeq	20	FALSE	GT	Octopus	notinalldifficult	INDEL	148402	54026	65371	0.73311	0.694204	0.713127	6
HG002+HG003+HG004	NovaSeq	20	FALSE	GT	GATK4	notinalldifficult	SNV	2459454	1154611	1231776	0.680523	0.666297	0.673335	6
HG002+HG003+HG004	NovaSeq	20	FALSE	GT	GATK4	notinalldifficult	INDEL	137659	64800	68180	0.679935	0.66877	0.674307	6
HG002+HG003+HG004	NovaSeq	20	FALSE	GT	FreeBayes	notinalldifficult	SNV	2459875	1154779	1928011	0.680528	0.560606	0.614774	6
HG002+HG003+HG004	NovaSeq	20	FALSE	GT	FreeBayes	notinalldifficult	INDEL	130106	72374	202754	0.642562	0.390873	0.486069	6
HG002+HG003+HG004	NovaSeq	20	FALSE	GT	Octopus	notinalllowmapandsegdup	SNV	2826099	1230595	924740	0.696651	0.753458	0.723942	6
HG002+HG003+HG004	NovaSeq	20	FALSE	GT	Octopus	notinalllowmapandsegdup	INDEL	371342	179202	212971	0.6745	0.635519	0.65443	6
HG002+HG003+HG004	NovaSeq	20	FALSE	GT	GATK4	notinalllowmapandsegdup	SNV	2757843	1299957	1394114	0.67964	0.664227	0.671845	6
HG002+HG003+HG004	NovaSeq	20	FALSE	GT	GATK4	notinalllowmapandsegdup	INDEL	341447	212172	202210	0.616754	0.628056	0.622354	6
HG002+HG003+HG004	NovaSeq	20	FALSE	GT	FreeBayes	notinalllowmapandsegdup	SNV	2756743	1302441	2237515	0.679137	0.551982	0.608993	6
HG002+HG003+HG004	NovaSeq	20	FALSE	GT	FreeBayes	notinalllowmapandsegdup	INDEL	318408	236499	340117	0.573804	0.483517	0.524806	6
HG002+HG003+HG004	NovaSeq	20	FALSE	GT	Octopus	AllTandemRepeatsandHomopolymers	SNV	131878	63916	45083	0.673555	0.745238	0.707585	6
HG002+HG003+HG004	NovaSeq	20	FALSE	GT	Octopus	AllTandemRepeatsandHomopolymers	INDEL	208592	120455	142261	0.633928	0.594528	0.613596	6
HG002+HG003+HG004	NovaSeq	20	FALSE	GT	GATK4	AllTandemRepeatsandHomopolymers	SNV	129862	66356	74960	0.661825	0.634024	0.647626	6
HG002+HG003+HG004	NovaSeq	20	FALSE	GT	GATK4	AllTandemRepeatsandHomopolymers	INDEL	190507	141596	127835	0.573638	0.598435	0.585774	6
HG002+HG003+HG004	NovaSeq	20	FALSE	GT	FreeBayes	AllTandemRepeatsandHomopolymers	SNV	128173	68752	155417	0.650872	0.451966	0.533482	6
HG002+HG003+HG004	NovaSeq	20	FALSE	GT	FreeBayes	AllTandemRepeatsandHomopolymers	INDEL	175757	157613	155792	0.527213	0.530109	0.528657	6
HG002+HG003+HG004	NovaSeq	20	FALSE	GT	Octopus	notinAllTandemRepeatsandHomopolymers	SNV	2885934	1293265	966479	0.690547	0.749124	0.718644	6
HG002+HG003+HG004	NovaSeq	20	FALSE	GT	Octopus	notinAllTandemRepeatsandHomopolymers	INDEL	174303	65684	77314	0.726302	0.692731	0.70912	6
HG002+HG003+HG004	NovaSeq	20	FALSE	GT	GATK4	notinAllTandemRepeatsandHomopolymers	SNV	2813453	1366454	1457139	0.67309	0.658797	0.665867	6
HG002+HG003+HG004	NovaSeq	20	FALSE	GT	GATK4	notinAllTandemRepeatsandHomopolymers	INDEL	161491	78543	82256	0.672784	0.662535	0.66762	6
HG002+HG003+HG004	NovaSeq	20	FALSE	GT	FreeBayes	notinAllTandemRepeatsandHomopolymers	SNV	2817575	1363146	2267242	0.673945	0.554115	0.608184	6
HG002+HG003+HG004	NovaSeq	20	FALSE	GT	FreeBayes	notinAllTandemRepeatsandHomopolymers	INDEL	152792	87281	248003	0.63644	0.381222	0.476828	6
HG002+HG003+HG004	NovaSeq	30	FALSE	GT	Octopus	genome	SNV	3513763	860911	754646	0.803206	0.823202	0.813081	6
HG002+HG003+HG004	NovaSeq	30	FALSE	GT	Octopus	genome	INDEL	440168	127317	173738	0.775647	0.716996	0.745169	6
HG002+HG003+HG004	NovaSeq	30	FALSE	GT	GATK4	genome	SNV	3314637	1061196	1170038	0.757487	0.739103	0.748182	6
HG002+HG003+HG004	NovaSeq	30	FALSE	GT	GATK4	genome	INDEL	405864	165332	180010	0.710551	0.69275	0.701538	6
HG002+HG003+HG004	NovaSeq	30	FALSE	GT	FreeBayes	genome	SNV	3308426	1069134	1988993	0.755769	0.624535	0.683914	6
HG002+HG003+HG004	NovaSeq	30	FALSE	GT	FreeBayes	genome	INDEL	377634	195002	343491	0.659466	0.523673	0.583777	6
HG002+HG003+HG004	NovaSeq	30	FALSE	GT	Octopus	alldifficult	SNV	580259	181113	154273	0.762123	0.789971	0.775797	6
HG002+HG003+HG004	NovaSeq	30	FALSE	GT	Octopus	alldifficult	INDEL	273521	91940	123226	0.748427	0.689409	0.717707	6
HG002+HG003+HG004	NovaSeq	30	FALSE	GT	GATK4	alldifficult	SNV	546742	215133	256211	0.717627	0.680914	0.698789	6
HG002+HG003+HG004	NovaSeq	30	FALSE	GT	GATK4	alldifficult	INDEL	251359	117774	119946	0.680944	0.676961	0.678947	6
HG002+HG003+HG004	NovaSeq	30	FALSE	GT	FreeBayes	alldifficult	SNV	546319	216597	424553	0.716093	0.56271	0.630203	6
HG002+HG003+HG004	NovaSeq	30	FALSE	GT	FreeBayes	alldifficult	INDEL	231180	139366	183490	0.62389	0.557504	0.588832	6
HG002+HG003+HG004	NovaSeq	30	FALSE	GT	Octopus	alllowmapandsegdup	SNV	224781	93478	78484	0.706283	0.741203	0.723322	6
HG002+HG003+HG004	NovaSeq	30	FALSE	GT	Octopus	alllowmapandsegdup	INDEL	12606	5062	5757	0.713493	0.686489	0.699731	6
HG002+HG003+HG004	NovaSeq	30	FALSE	GT	GATK4	alllowmapandsegdup	SNV	210180	108114	128334	0.660333	0.62089	0.640004	6
HG002+HG003+HG004	NovaSeq	30	FALSE	GT	GATK4	alllowmapandsegdup	INDEL	11397	6302	7684	0.643935	0.597296	0.619739	6
HG002+HG003+HG004	NovaSeq	30	FALSE	GT	FreeBayes	alllowmapandsegdup	SNV	212470	105989	168298	0.667182	0.558004	0.607728	6
HG002+HG003+HG004	NovaSeq	30	FALSE	GT	FreeBayes	alllowmapandsegdup	INDEL	11001	6717	24257	0.620894	0.312014	0.41532	6
HG002+HG003+HG004	NovaSeq	30	FALSE	GT	Octopus	notinalldifficult	SNV	2933504	679798	600373	0.811862	0.830109	0.820884	6
HG002+HG003+HG004	NovaSeq	30	FALSE	GT	Octopus	notinalldifficult	INDEL	166946	35469	50751	0.824771	0.766873	0.794769	6
HG002+HG003+HG004	NovaSeq	30	FALSE	GT	GATK4	notinalldifficult	SNV	2767895	846063	913827	0.76589	0.751794	0.758776	6
HG002+HG003+HG004	NovaSeq	30	FALSE	GT	GATK4	notinalldifficult	INDEL	154745	47709	60225	0.764346	0.719845	0.741428	6
HG002+HG003+HG004	NovaSeq	30	FALSE	GT	FreeBayes	notinalldifficult	SNV	2762107	852537	1564440	0.764144	0.638409	0.69564	6
HG002+HG003+HG004	NovaSeq	30	FALSE	GT	FreeBayes	notinalldifficult	INDEL	146699	55783	192569	0.724504	0.432399	0.541575	6
HG002+HG003+HG004	NovaSeq	30	FALSE	GT	Octopus	notinalllowmapandsegdup	SNV	3288982	767433	676162	0.81081	0.829474	0.820036	6
HG002+HG003+HG004	NovaSeq	30	FALSE	GT	Octopus	notinalllowmapandsegdup	INDEL	427392	122213	168042	0.777635	0.717782	0.746511	6
HG002+HG003+HG004	NovaSeq	30	FALSE	GT	GATK4	notinalllowmapandsegdup	SNV	3104457	953082	1041704	0.765108	0.748755	0.756843	6
HG002+HG003+HG004	NovaSeq	30	FALSE	GT	GATK4	notinalllowmapandsegdup	INDEL	394290	158995	172303	0.712635	0.695896	0.704166	6
HG002+HG003+HG004	NovaSeq	30	FALSE	GT	FreeBayes	notinalllowmapandsegdup	SNV	3095956	963145	1820695	0.76272	0.629688	0.689849	6
HG002+HG003+HG004	NovaSeq	30	FALSE	GT	FreeBayes	notinalllowmapandsegdup	INDEL	366473	188234	320203	0.66066	0.533691	0.590427	6
HG002+HG003+HG004	NovaSeq	30	FALSE	GT	Octopus	AllTandemRepeatsandHomopolymers	SNV	154506	41152	34541	0.789674	0.817289	0.803244	6
HG002+HG003+HG004	NovaSeq	30	FALSE	GT	Octopus	AllTandemRepeatsandHomopolymers	INDEL	244438	83670	113375	0.744993	0.683145	0.712729	6
HG002+HG003+HG004	NovaSeq	30	FALSE	GT	GATK4	AllTandemRepeatsandHomopolymers	SNV	147261	48827	61040	0.750994	0.706963	0.728314	6
HG002+HG003+HG004	NovaSeq	30	FALSE	GT	GATK4	AllTandemRepeatsandHomopolymers	INDEL	224614	107162	106768	0.677005	0.67781	0.677407	6
HG002+HG003+HG004	NovaSeq	30	FALSE	GT	FreeBayes	AllTandemRepeatsandHomopolymers	SNV	144923	51946	131410	0.736139	0.524451	0.612521	6
HG002+HG003+HG004	NovaSeq	30	FALSE	GT	FreeBayes	AllTandemRepeatsandHomopolymers	INDEL	205761	127403	140560	0.617597	0.594134	0.605638	6
HG002+HG003+HG004	NovaSeq	30	FALSE	GT	Octopus	notinAllTandemRepeatsandHomopolymers	SNV	3359257	819759	720105	0.803839	0.823476	0.813539	6
HG002+HG003+HG004	NovaSeq	30	FALSE	GT	Octopus	notinAllTandemRepeatsandHomopolymers	INDEL	196186	43792	60610	0.817517	0.763976	0.78984	6
HG002+HG003+HG004	NovaSeq	30	FALSE	GT	GATK4	notinAllTandemRepeatsandHomopolymers	SNV	3167376	1012369	1108998	0.757792	0.740669	0.749132	6
HG002+HG003+HG004	NovaSeq	30	FALSE	GT	GATK4	notinAllTandemRepeatsandHomopolymers	INDEL	181656	58365	73452	0.756834	0.712075	0.733772	6
HG002+HG003+HG004	NovaSeq	30	FALSE	GT	FreeBayes	notinAllTandemRepeatsandHomopolymers	SNV	3163503	1017188	1857583	0.756694	0.630044	0.687585	6
HG002+HG003+HG004	NovaSeq	30	FALSE	GT	FreeBayes	notinAllTandemRepeatsandHomopolymers	INDEL	172277	67799	237945	0.717594	0.41996	0.52984	6
HG002+HG003+HG004	NovaSeq	40	FALSE	GT	Octopus	genome	SNV	3778765	595800	572026	0.863804	0.868524	0.866157	6
HG002+HG003+HG004	NovaSeq	40	FALSE	GT	Octopus	genome	INDEL	473469	93578	133765	0.834973	0.779714	0.806398	6
HG002+HG003+HG004	NovaSeq	40	FALSE	GT	GATK4	genome	SNV	3538385	837351	944173	0.808638	0.789367	0.798886	6
HG002+HG003+HG004	NovaSeq	40	FALSE	GT	GATK4	genome	INDEL	439388	131658	153088	0.769444	0.741613	0.755272	6
HG002+HG003+HG004	NovaSeq	40	FALSE	GT	FreeBayes	genome	SNV	3522275	855249	1371966	0.804627	0.719677	0.759785	6
HG002+HG003+HG004	NovaSeq	40	FALSE	GT	FreeBayes	genome	INDEL	408687	163839	268952	0.713831	0.603104	0.653813	6
HG002+HG003+HG004	NovaSeq	40	FALSE	GT	Octopus	alldifficult	SNV	624668	136652	130956	0.820506	0.826692	0.823587	6
HG002+HG003+HG004	NovaSeq	40	FALSE	GT	Octopus	alldifficult	INDEL	296670	68367	97272	0.812712	0.75308	0.781761	6
HG002+HG003+HG004	NovaSeq	40	FALSE	GT	GATK4	alldifficult	SNV	583108	178688	227608	0.765439	0.719251	0.741626	6
HG002+HG003+HG004	NovaSeq	40	FALSE	GT	GATK4	alldifficult	INDEL	274378	94606	100212	0.743604	0.732476	0.737998	6
HG002+HG003+HG004	NovaSeq	40	FALSE	GT	FreeBayes	alldifficult	SNV	581898	180984	325780	0.762763	0.641084	0.69665	6
HG002+HG003+HG004	NovaSeq	40	FALSE	GT	FreeBayes	alldifficult	INDEL	252478	117962	153070	0.681562	0.62256	0.650727	6
HG002+HG003+HG004	NovaSeq	40	FALSE	GT	Octopus	alllowmapandsegdup	SNV	242632	75610	72661	0.762414	0.769545	0.765962	6
HG002+HG003+HG004	NovaSeq	40	FALSE	GT	Octopus	alllowmapandsegdup	INDEL	13490	4164	4982	0.764133	0.730294	0.746831	6
HG002+HG003+HG004	NovaSeq	40	FALSE	GT	GATK4	alllowmapandsegdup	SNV	224109	94172	123012	0.704123	0.645622	0.673605	6
HG002+HG003+HG004	NovaSeq	40	FALSE	GT	GATK4	alllowmapandsegdup	INDEL	12387	5310	7447	0.699949	0.624534	0.660094	6
HG002+HG003+HG004	NovaSeq	40	FALSE	GT	FreeBayes	alllowmapandsegdup	SNV	225794	92662	137143	0.709027	0.62213	0.662742	6
HG002+HG003+HG004	NovaSeq	40	FALSE	GT	FreeBayes	alllowmapandsegdup	INDEL	11797	5921	20931	0.66582	0.360456	0.467708	6
HG002+HG003+HG004	NovaSeq	40	FALSE	GT	Octopus	notinalldifficult	SNV	3154097	459148	441070	0.872926	0.877316	0.875116	6
HG002+HG003+HG004	NovaSeq	40	FALSE	GT	Octopus	notinalldifficult	INDEL	177101	25300	36774	0.875001	0.828058	0.850883	6
HG002+HG003+HG004	NovaSeq	40	FALSE	GT	GATK4	notinalldifficult	SNV	2955277	658663	716565	0.817744	0.804849	0.811245	6
HG002+HG003+HG004	NovaSeq	40	FALSE	GT	GATK4	notinalldifficult	INDEL	165287	37166	53015	0.816422	0.757148	0.785669	6
HG002+HG003+HG004	NovaSeq	40	FALSE	GT	FreeBayes	notinalldifficult	SNV	2940377	674265	1046186	0.813463	0.737572	0.773661	6
HG002+HG003+HG004	NovaSeq	40	FALSE	GT	FreeBayes	notinalldifficult	INDEL	156485	45994	141270	0.772846	0.52555	0.625647	6
HG002+HG003+HG004	NovaSeq	40	FALSE	GT	Octopus	notinalllowmapandsegdup	SNV	3536133	520190	499365	0.871758	0.876257	0.874002	6
HG002+HG003+HG004	NovaSeq	40	FALSE	GT	Octopus	notinalllowmapandsegdup	INDEL	459785	89396	128887	0.837219	0.781055	0.808162	6
HG002+HG003+HG004	NovaSeq	40	FALSE	GT	GATK4	notinalllowmapandsegdup	SNV	3314276	743179	821161	0.816836	0.801433	0.809061	6
HG002+HG003+HG004	NovaSeq	40	FALSE	GT	GATK4	notinalllowmapandsegdup	INDEL	426822	126315	145625	0.771639	0.74561	0.758401	6
HG002+HG003+HG004	NovaSeq	40	FALSE	GT	FreeBayes	notinalllowmapandsegdup	SNV	3296481	762587	1234823	0.812128	0.727491	0.767483	6
HG002+HG003+HG004	NovaSeq	40	FALSE	GT	FreeBayes	notinalllowmapandsegdup	INDEL	396732	157865	248796	0.715352	0.614585	0.661151	6
HG002+HG003+HG004	NovaSeq	40	FALSE	GT	Octopus	AllTandemRepeatsandHomopolymers	SNV	166458	29159	27332	0.850938	0.858961	0.854931	6
HG002+HG003+HG004	NovaSeq	40	FALSE	GT	Octopus	AllTandemRepeatsandHomopolymers	INDEL	265735	61951	89295	0.810944	0.748486	0.778464	6
HG002+HG003+HG004	NovaSeq	40	FALSE	GT	GATK4	AllTandemRepeatsandHomopolymers	SNV	157411	38618	50843	0.802999	0.755861	0.778717	6
HG002+HG003+HG004	NovaSeq	40	FALSE	GT	GATK4	AllTandemRepeatsandHomopolymers	INDEL	245728	85901	88008	0.740973	0.736295	0.738626	6
HG002+HG003+HG004	NovaSeq	40	FALSE	GT	FreeBayes	AllTandemRepeatsandHomopolymers	SNV	155250	41582	99596	0.788744	0.609191	0.687437	6
HG002+HG003+HG004	NovaSeq	40	FALSE	GT	FreeBayes	AllTandemRepeatsandHomopolymers	INDEL	225265	107793	117399	0.676354	0.657393	0.666739	6
HG002+HG003+HG004	NovaSeq	40	FALSE	GT	Octopus	notinAllTandemRepeatsandHomopolymers	SNV	3612307	566641	544694	0.864406	0.868969	0.866682	6
HG002+HG003+HG004	NovaSeq	40	FALSE	GT	Octopus	notinAllTandemRepeatsandHomopolymers	INDEL	208209	31753	44723	0.867675	0.823182	0.844843	6
HG002+HG003+HG004	NovaSeq	40	FALSE	GT	GATK4	notinAllTandemRepeatsandHomopolymers	SNV	3380974	798733	893330	0.808902	0.791	0.799851	6
HG002+HG003+HG004	NovaSeq	40	FALSE	GT	GATK4	notinAllTandemRepeatsandHomopolymers	INDEL	194101	45917	65267	0.808694	0.748361	0.777359	6
HG002+HG003+HG004	NovaSeq	40	FALSE	GT	FreeBayes	notinAllTandemRepeatsandHomopolymers	SNV	3367025	813667	1272370	0.805375	0.725747	0.76349	6
HG002+HG003+HG004	NovaSeq	40	FALSE	GT	FreeBayes	notinAllTandemRepeatsandHomopolymers	INDEL	183859	56214	178897	0.765846	0.506839	0.609987	6
HG002+HG003+HG004	NovaSeq	50	FALSE	GT	Octopus	genome	SNV	3931568	442624	448752	0.89881	0.897553	0.898181	6
HG002+HG003+HG004	NovaSeq	50	FALSE	GT	Octopus	genome	INDEL	494346	72353	105538	0.872326	0.824069	0.847511	6
HG002+HG003+HG004	NovaSeq	50	FALSE	GT	GATK4	genome	SNV	3694649	681074	793999	0.844352	0.82311	0.833595	6
HG002+HG003+HG004	NovaSeq	50	FALSE	GT	GATK4	genome	INDEL	462409	108583	126653	0.809834	0.784992	0.79722	6
HG002+HG003+HG004	NovaSeq	50	FALSE	GT	FreeBayes	genome	SNV	3669926	707514	1051757	0.838373	0.77725	0.806655	6
HG002+HG003+HG004	NovaSeq	50	FALSE	GT	FreeBayes	genome	INDEL	430728	141742	221446	0.752403	0.66045	0.703434	6
HG002+HG003+HG004	NovaSeq	50	FALSE	GT	Octopus	alldifficult	SNV	650415	110819	115100	0.854422	0.849644	0.852026	6
HG002+HG003+HG004	NovaSeq	50	FALSE	GT	Octopus	alldifficult	INDEL	311163	53582	78691	0.853097	0.798153	0.824711	6
HG002+HG003+HG004	NovaSeq	50	FALSE	GT	GATK4	alldifficult	SNV	608577	153202	207678	0.798889	0.745572	0.77131	6
HG002+HG003+HG004	NovaSeq	50	FALSE	GT	GATK4	alldifficult	INDEL	290110	78821	84362	0.786353	0.774717	0.780492	6
HG002+HG003+HG004	NovaSeq	50	FALSE	GT	FreeBayes	alldifficult	SNV	605908	156922	272029	0.79429	0.69015	0.738567	6
HG002+HG003+HG004	NovaSeq	50	FALSE	GT	FreeBayes	alldifficult	INDEL	267871	102514	131608	0.723223	0.670551	0.695892	6
HG002+HG003+HG004	NovaSeq	50	FALSE	GT	Octopus	alllowmapandsegdup	SNV	252748	65499	68783	0.794188	0.786077	0.790112	6
HG002+HG003+HG004	NovaSeq	50	FALSE	GT	Octopus	alllowmapandsegdup	INDEL	14018	3633	4443	0.794176	0.75933	0.776362	6
HG002+HG003+HG004	NovaSeq	50	FALSE	GT	GATK4	alllowmapandsegdup	SNV	233552	84736	119316	0.733776	0.661868	0.695969	6
HG002+HG003+HG004	NovaSeq	50	FALSE	GT	GATK4	alllowmapandsegdup	INDEL	12936	4764	7125	0.730847	0.644833	0.685151	6
HG002+HG003+HG004	NovaSeq	50	FALSE	GT	FreeBayes	alllowmapandsegdup	SNV	234654	83795	119766	0.736865	0.662079	0.697473	6
HG002+HG003+HG004	NovaSeq	50	FALSE	GT	FreeBayes	alllowmapandsegdup	INDEL	12312	5408	18696	0.694808	0.397059	0.505336	6
HG002+HG003+HG004	NovaSeq	50	FALSE	GT	Octopus	notinalldifficult	SNV	3281153	331805	333652	0.908163	0.907698	0.90793	6
HG002+HG003+HG004	NovaSeq	50	FALSE	GT	Octopus	notinalldifficult	INDEL	183516	18830	27073	0.906942	0.871442	0.888837	6
HG002+HG003+HG004	NovaSeq	50	FALSE	GT	GATK4	notinalldifficult	SNV	3086072	527872	586321	0.853935	0.840344	0.847085	6
HG002+HG003+HG004	NovaSeq	50	FALSE	GT	GATK4	notinalldifficult	INDEL	172625	29827	42371	0.852671	0.802922	0.827049	6
HG002+HG003+HG004	NovaSeq	50	FALSE	GT	FreeBayes	notinalldifficult	SNV	3064018	550592	779728	0.847676	0.797144	0.821634	6
HG002+HG003+HG004	NovaSeq	50	FALSE	GT	FreeBayes	notinalldifficult	INDEL	163177	39301	110069	0.8059	0.59718	0.686015	6
HG002+HG003+HG004	NovaSeq	50	FALSE	GT	Octopus	notinalllowmapandsegdup	SNV	3678820	377125	379969	0.907019	0.906384	0.906701	6
HG002+HG003+HG004	NovaSeq	50	FALSE	GT	Octopus	notinalllowmapandsegdup	INDEL	480134	68702	101201	0.874822	0.825916	0.849666	6
HG002+HG003+HG004	NovaSeq	50	FALSE	GT	GATK4	notinalllowmapandsegdup	SNV	3461097	596338	674683	0.853026	0.836867	0.844869	6
HG002+HG003+HG004	NovaSeq	50	FALSE	GT	GATK4	notinalllowmapandsegdup	INDEL	449296	103785	119499	0.812351	0.789908	0.800973	6
HG002+HG003+HG004	NovaSeq	50	FALSE	GT	FreeBayes	notinalllowmapandsegdup	SNV	3435272	623719	931991	0.846336	0.786596	0.815373	6
HG002+HG003+HG004	NovaSeq	50	FALSE	GT	FreeBayes	notinalllowmapandsegdup	INDEL	418254	136285	203404	0.754237	0.672804	0.711197	6
HG002+HG003+HG004	NovaSeq	50	FALSE	GT	Octopus	AllTandemRepeatsandHomopolymers	SNV	173695	21870	22233	0.88817	0.886525	0.887347	6
HG002+HG003+HG004	NovaSeq	50	FALSE	GT	Octopus	AllTandemRepeatsandHomopolymers	INDEL	279066	48346	72089	0.852339	0.794709	0.822516	6
HG002+HG003+HG004	NovaSeq	50	FALSE	GT	GATK4	AllTandemRepeatsandHomopolymers	SNV	164723	31280	43465	0.840411	0.791222	0.815075	6
HG002+HG003+HG004	NovaSeq	50	FALSE	GT	GATK4	AllTandemRepeatsandHomopolymers	INDEL	260188	71385	73434	0.784708	0.779889	0.782291	6
HG002+HG003+HG004	NovaSeq	50	FALSE	GT	FreeBayes	AllTandemRepeatsandHomopolymers	SNV	162242	34556	81868	0.824409	0.664627	0.735945	6
HG002+HG003+HG004	NovaSeq	50	FALSE	GT	FreeBayes	AllTandemRepeatsandHomopolymers	INDEL	239523	93479	100650	0.719284	0.704121	0.711622	6
HG002+HG003+HG004	NovaSeq	50	FALSE	GT	Octopus	notinAllTandemRepeatsandHomopolymers	SNV	3757873	420754	426519	0.899308	0.898069	0.898688	6
HG002+HG003+HG004	NovaSeq	50	FALSE	GT	Octopus	notinAllTandemRepeatsandHomopolymers	INDEL	215796	24093	33650	0.899566	0.865101	0.881997	6
HG002+HG003+HG004	NovaSeq	50	FALSE	GT	GATK4	notinAllTandemRepeatsandHomopolymers	SNV	3529926	649794	750534	0.844536	0.82466	0.83448	6
HG002+HG003+HG004	NovaSeq	50	FALSE	GT	GATK4	notinAllTandemRepeatsandHomopolymers	INDEL	202726	37294	53343	0.844621	0.791685	0.817297	6
HG002+HG003+HG004	NovaSeq	50	FALSE	GT	FreeBayes	notinAllTandemRepeatsandHomopolymers	SNV	3507684	672958	969889	0.83903	0.78339	0.810256	6
HG002+HG003+HG004	NovaSeq	50	FALSE	GT	FreeBayes	notinAllTandemRepeatsandHomopolymers	INDEL	191699	48372	142594	0.79851	0.573446	0.667517	6
HG002+HG003+HG004	NovaSeq	60	FALSE	GT	Octopus	genome	SNV	4028483	345427	364528	0.921026	0.917021	0.919019	6
HG002+HG003+HG004	NovaSeq	60	FALSE	GT	Octopus	genome	INDEL	508893	57678	84372	0.898198	0.857784	0.877526	6
HG002+HG003+HG004	NovaSeq	60	FALSE	GT	GATK4	genome	SNV	3808917	566773	677056	0.870472	0.849073	0.859639	6
HG002+HG003+HG004	NovaSeq	60	FALSE	GT	GATK4	genome	INDEL	478931	92068	104429	0.83876	0.820987	0.829778	6
HG002+HG003+HG004	NovaSeq	60	FALSE	GT	FreeBayes	genome	SNV	3781947	595497	884678	0.863962	0.810424	0.836337	6
HG002+HG003+HG004	NovaSeq	60	FALSE	GT	FreeBayes	genome	INDEL	446976	125467	194482	0.780822	0.696813	0.736429	6
HG002+HG003+HG004	NovaSeq	60	FALSE	GT	Octopus	alldifficult	SNV	666639	94486	104487	0.87586	0.864501	0.870143	6
HG002+HG003+HG004	NovaSeq	60	FALSE	GT	Octopus	alldifficult	INDEL	321309	43279	64350	0.881293	0.833143	0.856542	6
HG002+HG003+HG004	NovaSeq	60	FALSE	GT	GATK4	alldifficult	SNV	627483	134276	190459	0.823729	0.767149	0.794433	6
HG002+HG003+HG004	NovaSeq	60	FALSE	GT	GATK4	alldifficult	INDEL	301587	67349	72512	0.817451	0.806169	0.811771	6
HG002+HG003+HG004	NovaSeq	60	FALSE	GT	FreeBayes	alldifficult	SNV	623969	138862	242443	0.817965	0.720176	0.765962	6
HG002+HG003+HG004	NovaSeq	60	FALSE	GT	FreeBayes	alldifficult	INDEL	279295	91062	117778	0.754124	0.703385	0.727871	6
HG002+HG003+HG004	NovaSeq	60	FALSE	GT	Octopus	alllowmapandsegdup	SNV	259106	59104	66308	0.814261	0.796235	0.805147	6
HG002+HG003+HG004	NovaSeq	60	FALSE	GT	Octopus	alllowmapandsegdup	INDEL	14372	3280	4174	0.814185	0.774938	0.794077	6
HG002+HG003+HG004	NovaSeq	60	FALSE	GT	GATK4	alllowmapandsegdup	SNV	240704	77564	114732	0.756293	0.677208	0.714569	6
HG002+HG003+HG004	NovaSeq	60	FALSE	GT	GATK4	alllowmapandsegdup	INDEL	13302	4396	6735	0.75161	0.663872	0.705022	6
HG002+HG003+HG004	NovaSeq	60	FALSE	GT	FreeBayes	alllowmapandsegdup	SNV	241190	77249	109853	0.757414	0.687067	0.720527	6
HG002+HG003+HG004	NovaSeq	60	FALSE	GT	FreeBayes	alllowmapandsegdup	INDEL	12592	5125	17450	0.71073	0.419147	0.527314	6
HG002+HG003+HG004	NovaSeq	60	FALSE	GT	Octopus	notinalldifficult	SNV	3361844	250941	260041	0.930541	0.928203	0.92937	6
HG002+HG003+HG004	NovaSeq	60	FALSE	GT	Octopus	notinalldifficult	INDEL	187933	14441	20242	0.928642	0.902765	0.91552	6
HG002+HG003+HG004	NovaSeq	60	FALSE	GT	GATK4	notinalldifficult	SNV	3181434	432497	486597	0.880325	0.867341	0.873785	6
HG002+HG003+HG004	NovaSeq	60	FALSE	GT	GATK4	notinalldifficult	INDEL	177658	24796	32012	0.877523	0.847322	0.862158	6
HG002+HG003+HG004	NovaSeq	60	FALSE	GT	FreeBayes	notinalldifficult	SNV	3157978	456635	642235	0.87367	0.831	0.851801	6
HG002+HG003+HG004	NovaSeq	60	FALSE	GT	FreeBayes	notinalldifficult	INDEL	168016	34464	93675	0.829791	0.64204	0.72394	6
HG002+HG003+HG004	NovaSeq	60	FALSE	GT	Octopus	notinalllowmapandsegdup	SNV	3769377	286323	298220	0.929402	0.926684	0.928041	6
HG002+HG003+HG004	NovaSeq	60	FALSE	GT	Octopus	notinalllowmapandsegdup	INDEL	494327	54380	80317	0.900894	0.860232	0.880094	6
HG002+HG003+HG004	NovaSeq	60	FALSE	GT	GATK4	notinalllowmapandsegdup	SNV	3568213	489209	562324	0.879429	0.863862	0.871576	6
HG002+HG003+HG004	NovaSeq	60	FALSE	GT	GATK4	notinalllowmapandsegdup	INDEL	465448	87642	97669	0.841541	0.826556	0.833982	6
HG002+HG003+HG004	NovaSeq	60	FALSE	GT	FreeBayes	notinalllowmapandsegdup	SNV	3540757	518248	774825	0.872321	0.820459	0.845596	6
HG002+HG003+HG004	NovaSeq	60	FALSE	GT	FreeBayes	notinalllowmapandsegdup	INDEL	434215	120300	177592	0.783054	0.709725	0.744589	6
HG002+HG003+HG004	NovaSeq	60	FALSE	GT	Octopus	AllTandemRepeatsandHomopolymers	SNV	178263	17258	18904	0.911733	0.904122	0.907912	6
HG002+HG003+HG004	NovaSeq	60	FALSE	GT	Octopus	AllTandemRepeatsandHomopolymers	INDEL	288443	38810	58621	0.881407	0.831095	0.855512	6
HG002+HG003+HG004	NovaSeq	60	FALSE	GT	GATK4	AllTandemRepeatsandHomopolymers	SNV	170076	25937	37730	0.867677	0.818436	0.842338	6
HG002+HG003+HG004	NovaSeq	60	FALSE	GT	GATK4	AllTandemRepeatsandHomopolymers	INDEL	270723	60858	62863	0.816461	0.811554	0.814	6
HG002+HG003+HG004	NovaSeq	60	FALSE	GT	FreeBayes	AllTandemRepeatsandHomopolymers	SNV	167464	29345	72382	0.850896	0.698215	0.767031	6
HG002+HG003+HG004	NovaSeq	60	FALSE	GT	FreeBayes	AllTandemRepeatsandHomopolymers	INDEL	250131	82846	89515	0.751196	0.736446	0.743748	6
HG002+HG003+HG004	NovaSeq	60	FALSE	GT	Octopus	notinAllTandemRepeatsandHomopolymers	SNV	3850220	328169	345624	0.92146	0.917627	0.91954	6
HG002+HG003+HG004	NovaSeq	60	FALSE	GT	Octopus	notinAllTandemRepeatsandHomopolymers	INDEL	220992	18927	25921	0.921111	0.89502	0.907878	6
HG002+HG003+HG004	NovaSeq	60	FALSE	GT	GATK4	notinAllTandemRepeatsandHomopolymers	SNV	3638841	540836	639326	0.870603	0.850561	0.860465	6
HG002+HG003+HG004	NovaSeq	60	FALSE	GT	GATK4	notinAllTandemRepeatsandHomopolymers	INDEL	208702	31317	41700	0.869523	0.833468	0.851114	6
HG002+HG003+HG004	NovaSeq	60	FALSE	GT	FreeBayes	notinAllTandemRepeatsandHomopolymers	SNV	3614483	566152	812296	0.864578	0.816504	0.839853	6
HG002+HG003+HG004	NovaSeq	60	FALSE	GT	FreeBayes	notinAllTandemRepeatsandHomopolymers	INDEL	197345	42724	123280	0.822034	0.615501	0.703931	6
HG002+HG003+HG004	NovaSeq	70	FALSE	GT	Octopus	genome	SNV	4096211	277956	303846	0.936455	0.930945	0.933692	6
HG002+HG003+HG004	NovaSeq	70	FALSE	GT	Octopus	genome	INDEL	519374	47167	68771	0.916746	0.883071	0.899593	6
HG002+HG003+HG004	NovaSeq	70	FALSE	GT	GATK4	genome	SNV	3895363	480294	585327	0.890235	0.869367	0.879677	6
HG002+HG003+HG004	NovaSeq	70	FALSE	GT	GATK4	genome	INDEL	492780	78173	86718	0.863083	0.850357	0.856673	6
HG002+HG003+HG004	NovaSeq	70	FALSE	GT	FreeBayes	genome	SNV	3867817	509618	770031	0.883581	0.833968	0.858058	6
HG002+HG003+HG004	NovaSeq	70	FALSE	GT	FreeBayes	genome	INDEL	459961	112473	175060	0.803518	0.724324	0.761869	6
HG002+HG003+HG004	NovaSeq	70	FALSE	GT	Octopus	alldifficult	SNV	678257	82907	96708	0.891079	0.87521	0.883073	6
HG002+HG003+HG004	NovaSeq	70	FALSE	GT	Octopus	alldifficult	INDEL	328653	35894	53760	0.901538	0.859419	0.879975	6
HG002+HG003+HG004	NovaSeq	70	FALSE	GT	GATK4	alldifficult	SNV	641335	120385	177175	0.841956	0.78354	0.811698	6
HG002+HG003+HG004	NovaSeq	70	FALSE	GT	GATK4	alldifficult	INDEL	311128	57763	62283	0.843414	0.833205	0.838279	6
HG002+HG003+HG004	NovaSeq	70	FALSE	GT	FreeBayes	alldifficult	SNV	637826	124992	222641	0.836144	0.741256	0.785846	6
HG002+HG003+HG004	NovaSeq	70	FALSE	GT	FreeBayes	alldifficult	INDEL	288380	81966	107191	0.778677	0.729022	0.753032	6
HG002+HG003+HG004	NovaSeq	70	FALSE	GT	Octopus	alllowmapandsegdup	SNV	263567	54651	64578	0.828259	0.803203	0.815539	6
HG002+HG003+HG004	NovaSeq	70	FALSE	GT	Octopus	alllowmapandsegdup	INDEL	14642	3007	3935	0.829622	0.788179	0.80837	6
HG002+HG003+HG004	NovaSeq	70	FALSE	GT	GATK4	alllowmapandsegdup	SNV	246024	72242	110688	0.773014	0.689699	0.728984	6
HG002+HG003+HG004	NovaSeq	70	FALSE	GT	GATK4	alllowmapandsegdup	INDEL	13622	4074	6359	0.769778	0.681748	0.723094	6
HG002+HG003+HG004	NovaSeq	70	FALSE	GT	FreeBayes	alllowmapandsegdup	SNV	246124	72319	103219	0.772898	0.704534	0.737134	6
HG002+HG003+HG004	NovaSeq	70	FALSE	GT	FreeBayes	alllowmapandsegdup	INDEL	12906	4812	16703	0.728412	0.435881	0.545397	6
HG002+HG003+HG004	NovaSeq	70	FALSE	GT	Octopus	notinalldifficult	SNV	3417954	195049	207138	0.946015	0.94286	0.944435	6
HG002+HG003+HG004	NovaSeq	70	FALSE	GT	Octopus	notinalldifficult	INDEL	191074	11311	15251	0.944111	0.926083	0.93501	6
HG002+HG003+HG004	NovaSeq	70	FALSE	GT	GATK4	notinalldifficult	SNV	3254028	359909	408152	0.900411	0.888549	0.894441	6
HG002+HG003+HG004	NovaSeq	70	FALSE	GT	GATK4	notinalldifficult	INDEL	181994	20459	24496	0.898944	0.88137	0.89007	6
HG002+HG003+HG004	NovaSeq	70	FALSE	GT	FreeBayes	notinalldifficult	SNV	3229991	384626	547390	0.893591	0.855087	0.873916	6
HG002+HG003+HG004	NovaSeq	70	FALSE	GT	FreeBayes	notinalldifficult	INDEL	171917	30563	82413	0.849057	0.67596	0.752685	6
HG002+HG003+HG004	NovaSeq	70	FALSE	GT	Octopus	notinalllowmapandsegdup	SNV	3832644	223305	239268	0.944944	0.941239	0.943088	6
HG002+HG003+HG004	NovaSeq	70	FALSE	GT	Octopus	notinalllowmapandsegdup	INDEL	504536	44144	64974	0.919545	0.885912	0.902416	6
HG002+HG003+HG004	NovaSeq	70	FALSE	GT	GATK4	notinalllowmapandsegdup	SNV	3649339	408052	474639	0.89943	0.884907	0.89211	6
HG002+HG003+HG004	NovaSeq	70	FALSE	GT	GATK4	notinalllowmapandsegdup	INDEL	478972	74074	80337	0.866062	0.856364	0.861186	6
HG002+HG003+HG004	NovaSeq	70	FALSE	GT	FreeBayes	notinalllowmapandsegdup	SNV	3621693	437299	666812	0.892264	0.844512	0.867731	6
HG002+HG003+HG004	NovaSeq	70	FALSE	GT	FreeBayes	notinalllowmapandsegdup	INDEL	446889	107616	158862	0.805924	0.737744	0.770328	6
HG002+HG003+HG004	NovaSeq	70	FALSE	GT	Octopus	AllTandemRepeatsandHomopolymers	SNV	181723	13809	16280	0.929377	0.917779	0.923542	6
HG002+HG003+HG004	NovaSeq	70	FALSE	GT	Octopus	AllTandemRepeatsandHomopolymers	INDEL	295176	32027	48661	0.902119	0.858477	0.879757	6
HG002+HG003+HG004	NovaSeq	70	FALSE	GT	GATK4	AllTandemRepeatsandHomopolymers	SNV	173986	21989	33385	0.887797	0.839008	0.862713	6
HG002+HG003+HG004	NovaSeq	70	FALSE	GT	GATK4	AllTandemRepeatsandHomopolymers	INDEL	279530	52006	53647	0.843136	0.838983	0.841055	6
HG002+HG003+HG004	NovaSeq	70	FALSE	GT	FreeBayes	AllTandemRepeatsandHomopolymers	SNV	171680	25115	66074	0.87238	0.722091	0.790153	6
HG002+HG003+HG004	NovaSeq	70	FALSE	GT	FreeBayes	AllTandemRepeatsandHomopolymers	INDEL	258593	74372	80555	0.776637	0.762478	0.769493	6
HG002+HG003+HG004	NovaSeq	70	FALSE	GT	Octopus	notinAllTandemRepeatsandHomopolymers	SNV	3914488	264147	287566	0.936786	0.931565	0.934169	6
HG002+HG003+HG004	NovaSeq	70	FALSE	GT	Octopus	notinAllTandemRepeatsandHomopolymers	INDEL	224747	15192	20280	0.936684	0.917234	0.926857	6
HG002+HG003+HG004	NovaSeq	70	FALSE	GT	GATK4	notinAllTandemRepeatsandHomopolymers	SNV	3721377	458305	551942	0.890349	0.87084	0.880487	6
HG002+HG003+HG004	NovaSeq	70	FALSE	GT	GATK4	notinAllTandemRepeatsandHomopolymers	INDEL	213768	26250	33173	0.890633	0.865664	0.877971	6
HG002+HG003+HG004	NovaSeq	70	FALSE	GT	FreeBayes	notinAllTandemRepeatsandHomopolymers	SNV	3696137	484503	703957	0.884108	0.840013	0.861497	6
HG002+HG003+HG004	NovaSeq	70	FALSE	GT	FreeBayes	notinAllTandemRepeatsandHomopolymers	INDEL	201876	38194	110159	0.840905	0.646966	0.731296	6
HG002+HG003+HG004	NovaSeq	80	FALSE	GT	Octopus	genome	SNV	4144831	229238	258847	0.947592	0.94122	0.944395	6
HG002+HG003+HG004	NovaSeq	80	FALSE	GT	Octopus	genome	INDEL	527150	39336	57410	0.930561	0.901789	0.915949	6
HG002+HG003+HG004	NovaSeq	80	FALSE	GT	GATK4	genome	SNV	3963503	412162	512417	0.905806	0.885517	0.895547	6
HG002+HG003+HG004	NovaSeq	80	FALSE	GT	GATK4	genome	INDEL	503155	67794	74791	0.881261	0.870592	0.875894	6
HG002+HG003+HG004	NovaSeq	80	FALSE	GT	FreeBayes	genome	SNV	3934776	442636	684711	0.898882	0.851778	0.874696	6
HG002+HG003+HG004	NovaSeq	80	FALSE	GT	FreeBayes	genome	INDEL	470334	102042	160231	0.821722	0.745893	0.781974	6
HG002+HG003+HG004	NovaSeq	80	FALSE	GT	Octopus	alldifficult	SNV	686898	74248	90831	0.902452	0.88321	0.892727	6
HG002+HG003+HG004	NovaSeq	80	FALSE	GT	Octopus	alldifficult	INDEL	334288	30210	45592	0.917119	0.879983	0.898167	6
HG002+HG003+HG004	NovaSeq	80	FALSE	GT	GATK4	alldifficult	SNV	652447	109273	166207	0.856544	0.796975	0.825687	6
HG002+HG003+HG004	NovaSeq	80	FALSE	GT	GATK4	alldifficult	INDEL	318324	50564	54730	0.862929	0.853292	0.858083	6
HG002+HG003+HG004	NovaSeq	80	FALSE	GT	FreeBayes	alldifficult	SNV	648419	114378	207583	0.850054	0.757497	0.801111	6
HG002+HG003+HG004	NovaSeq	80	FALSE	GT	FreeBayes	alldifficult	INDEL	295814	74472	98796	0.79888	0.749636	0.773475	6
HG002+HG003+HG004	NovaSeq	80	FALSE	GT	Octopus	alllowmapandsegdup	SNV	267020	51187	63057	0.839139	0.808963	0.823775	6
HG002+HG003+HG004	NovaSeq	80	FALSE	GT	Octopus	alllowmapandsegdup	INDEL	14771	2877	3836	0.836979	0.793841	0.814839	6
HG002+HG003+HG004	NovaSeq	80	FALSE	GT	GATK4	alllowmapandsegdup	SNV	250075	68196	107495	0.78573	0.699374	0.740041	6
HG002+HG003+HG004	NovaSeq	80	FALSE	GT	GATK4	alllowmapandsegdup	INDEL	13839	3860	6106	0.781909	0.693858	0.735257	6
HG002+HG003+HG004	NovaSeq	80	FALSE	GT	FreeBayes	alllowmapandsegdup	SNV	250035	68404	97822	0.78519	0.718787	0.750522	6
HG002+HG003+HG004	NovaSeq	80	FALSE	GT	FreeBayes	alllowmapandsegdup	INDEL	13131	4589	16132	0.741027	0.448724	0.558968	6
HG002+HG003+HG004	NovaSeq	80	FALSE	GT	Octopus	notinalldifficult	SNV	3457933	154990	168016	0.957101	0.953663	0.955379	6
HG002+HG003+HG004	NovaSeq	80	FALSE	GT	Octopus	notinalldifficult	INDEL	193234	9145	12027	0.954813	0.941406	0.948062	6
HG002+HG003+HG004	NovaSeq	80	FALSE	GT	GATK4	notinalldifficult	SNV	3311056	302889	346210	0.916189	0.905336	0.91073	6
HG002+HG003+HG004	NovaSeq	80	FALSE	GT	GATK4	notinalldifficult	INDEL	185181	17271	20111	0.914691	0.902037	0.90832	6
HG002+HG003+HG004	NovaSeq	80	FALSE	GT	FreeBayes	notinalldifficult	SNV	3286357	328258	477128	0.909186	0.873222	0.890841	6
HG002+HG003+HG004	NovaSeq	80	FALSE	GT	FreeBayes	notinalldifficult	INDEL	174879	27603	74110	0.863677	0.702356	0.774708	6
HG002+HG003+HG004	NovaSeq	80	FALSE	GT	Octopus	notinalllowmapandsegdup	SNV	3877811	178051	195790	0.9561	0.951937	0.954014	6
HG002+HG003+HG004	NovaSeq	80	FALSE	GT	Octopus	notinalllowmapandsegdup	INDEL	512182	36444	53699	0.933572	0.905105	0.919118	6
HG002+HG003+HG004	NovaSeq	80	FALSE	GT	GATK4	notinalllowmapandsegdup	SNV	3713428	343966	404922	0.915225	0.901679	0.908401	6
HG002+HG003+HG004	NovaSeq	80	FALSE	GT	GATK4	notinalllowmapandsegdup	INDEL	489136	63903	68655	0.884451	0.876916	0.880668	6
HG002+HG003+HG004	NovaSeq	80	FALSE	GT	FreeBayes	notinalllowmapandsegdup	SNV	3684741	374232	586889	0.907801	0.862608	0.884628	6
HG002+HG003+HG004	NovaSeq	80	FALSE	GT	FreeBayes	notinalllowmapandsegdup	INDEL	457032	97413	144563	0.824305	0.7597	0.790685	6
HG002+HG003+HG004	NovaSeq	80	FALSE	GT	Octopus	AllTandemRepeatsandHomopolymers	SNV	184137	11406	14516	0.94167	0.926928	0.934241	6
HG002+HG003+HG004	NovaSeq	80	FALSE	GT	Octopus	AllTandemRepeatsandHomopolymers	INDEL	300513	26644	40809	0.918559	0.880438	0.899095	6
HG002+HG003+HG004	NovaSeq	80	FALSE	GT	GATK4	AllTandemRepeatsandHomopolymers	SNV	177090	18883	29900	0.903645	0.855549	0.878939	6
HG002+HG003+HG004	NovaSeq	80	FALSE	GT	GATK4	AllTandemRepeatsandHomopolymers	INDEL	286266	45266	46678	0.863464	0.859802	0.861629	6
HG002+HG003+HG004	NovaSeq	80	FALSE	GT	FreeBayes	AllTandemRepeatsandHomopolymers	SNV	174742	22037	61389	0.888011	0.740021	0.80729	6
HG002+HG003+HG004	NovaSeq	80	FALSE	GT	FreeBayes	AllTandemRepeatsandHomopolymers	INDEL	265492	67413	73406	0.797501	0.783398	0.790386	6
HG002+HG003+HG004	NovaSeq	80	FALSE	GT	Octopus	notinAllTandemRepeatsandHomopolymers	SNV	3960694	217832	244331	0.947869	0.941895	0.944873	6
HG002+HG003+HG004	NovaSeq	80	FALSE	GT	Octopus	notinAllTandemRepeatsandHomopolymers	INDEL	227203	12727	16745	0.946955	0.931358	0.939092	6
HG002+HG003+HG004	NovaSeq	80	FALSE	GT	GATK4	notinAllTandemRepeatsandHomopolymers	SNV	3786413	393279	482517	0.905907	0.88697	0.896339	6
HG002+HG003+HG004	NovaSeq	80	FALSE	GT	GATK4	notinAllTandemRepeatsandHomopolymers	INDEL	217414	22604	28206	0.905824	0.885164	0.895375	6
HG002+HG003+HG004	NovaSeq	80	FALSE	GT	FreeBayes	notinAllTandemRepeatsandHomopolymers	SNV	3760034	420599	623322	0.899393	0.857798	0.878103	6
HG002+HG003+HG004	NovaSeq	80	FALSE	GT	FreeBayes	notinAllTandemRepeatsandHomopolymers	INDEL	205373	34699	100472	0.855464	0.671494	0.752396	6
HG002+HG003+HG004	NovaSeq	90	FALSE	GT	Octopus	genome	SNV	4180862	193123	225067	0.955847	0.948917	0.95237	6
HG002+HG003+HG004	NovaSeq	90	FALSE	GT	Octopus	genome	INDEL	532976	33526	49387	0.940819	0.915196	0.927831	6
HG002+HG003+HG004	NovaSeq	90	FALSE	GT	GATK4	genome	SNV	4019376	355759	454100	0.918686	0.898491	0.908476	6
HG002+HG003+HG004	NovaSeq	90	FALSE	GT	GATK4	genome	INDEL	511255	59621	66069	0.895562	0.88556	0.890533	6
HG002+HG003+HG004	NovaSeq	90	FALSE	GT	FreeBayes	genome	SNV	3988899	388512	617730	0.911246	0.865904	0.887997	6
HG002+HG003+HG004	NovaSeq	90	FALSE	GT	FreeBayes	genome	INDEL	478748	93601	148629	0.836462	0.763095	0.798096	6
HG002+HG003+HG004	NovaSeq	90	FALSE	GT	Octopus	alldifficult	SNV	692964	68158	86677	0.910451	0.888824	0.899508	6
HG002+HG003+HG004	NovaSeq	90	FALSE	GT	Octopus	alldifficult	INDEL	338393	26116	39753	0.928353	0.894874	0.911306	6
HG002+HG003+HG004	NovaSeq	90	FALSE	GT	GATK4	alldifficult	SNV	661550	100073	157555	0.868606	0.80765	0.837019	6
HG002+HG003+HG004	NovaSeq	90	FALSE	GT	GATK4	alldifficult	INDEL	323930	44909	48863	0.878242	0.868927	0.87356	6
HG002+HG003+HG004	NovaSeq	90	FALSE	GT	FreeBayes	alldifficult	SNV	657500	105297	195603	0.861959	0.770716	0.813788	6
HG002+HG003+HG004	NovaSeq	90	FALSE	GT	FreeBayes	alldifficult	INDEL	301753	68511	91959	0.814967	0.766431	0.789954	6
HG002+HG003+HG004	NovaSeq	90	FALSE	GT	Octopus	alllowmapandsegdup	SNV	269305	48872	62180	0.8464	0.81242	0.829062	6
HG002+HG003+HG004	NovaSeq	90	FALSE	GT	Octopus	alllowmapandsegdup	INDEL	14965	2682	3703	0.848019	0.801639	0.824177	6
HG002+HG003+HG004	NovaSeq	90	FALSE	GT	GATK4	alllowmapandsegdup	SNV	253534	64676	105146	0.796751	0.706853	0.749114	6
HG002+HG003+HG004	NovaSeq	90	FALSE	GT	GATK4	alllowmapandsegdup	INDEL	14012	3683	5977	0.791862	0.700986	0.743658	6
HG002+HG003+HG004	NovaSeq	90	FALSE	GT	FreeBayes	alllowmapandsegdup	SNV	253502	64934	93645	0.796085	0.730244	0.761744	6
HG002+HG003+HG004	NovaSeq	90	FALSE	GT	FreeBayes	alllowmapandsegdup	INDEL	13268	4450	15644	0.748843	0.45891	0.569076	6
HG002+HG003+HG004	NovaSeq	90	FALSE	GT	Octopus	notinalldifficult	SNV	3487898	124965	138390	0.965411	0.961837	0.963621	6
HG002+HG003+HG004	NovaSeq	90	FALSE	GT	Octopus	notinalldifficult	INDEL	194965	7419	9851	0.963342	0.951903	0.957588	6
HG002+HG003+HG004	NovaSeq	90	FALSE	GT	GATK4	notinalldifficult	SNV	3357826	255686	296545	0.929242	0.918852	0.924018	6
HG002+HG003+HG004	NovaSeq	90	FALSE	GT	GATK4	notinalldifficult	INDEL	187679	14749	17256	0.92714	0.915798	0.921434	6
HG002+HG003+HG004	NovaSeq	90	FALSE	GT	FreeBayes	notinalldifficult	SNV	3331399	283215	422127	0.921647	0.887539	0.904271	6
HG002+HG003+HG004	NovaSeq	90	FALSE	GT	FreeBayes	notinalldifficult	INDEL	177361	25116	67860	0.875956	0.72327	0.792324	6
HG002+HG003+HG004	NovaSeq	90	FALSE	GT	Octopus	notinalllowmapandsegdup	SNV	3911557	144251	162887	0.964433	0.960022	0.962223	6
HG002+HG003+HG004	NovaSeq	90	FALSE	GT	Octopus	notinalllowmapandsegdup	INDEL	517813	30829	45829	0.943809	0.918691	0.931081	6
HG002+HG003+HG004	NovaSeq	90	FALSE	GT	GATK4	notinalllowmapandsegdup	SNV	3765842	291083	348954	0.92825	0.915195	0.921677	6
HG002+HG003+HG004	NovaSeq	90	FALSE	GT	GATK4	notinalllowmapandsegdup	INDEL	497055	55915	60071	0.898882	0.892177	0.895517	6
HG002+HG003+HG004	NovaSeq	90	FALSE	GT	FreeBayes	notinalllowmapandsegdup	SNV	3735397	323578	524085	0.920281	0.87696	0.898099	6
HG002+HG003+HG004	NovaSeq	90	FALSE	GT	FreeBayes	notinalllowmapandsegdup	INDEL	465305	89115	133428	0.839264	0.777149	0.807013	6
HG002+HG003+HG004	NovaSeq	90	FALSE	GT	Octopus	AllTandemRepeatsandHomopolymers	SNV	185815	9743	13190	0.950178	0.93372	0.941877	6
HG002+HG003+HG004	NovaSeq	90	FALSE	GT	Octopus	AllTandemRepeatsandHomopolymers	INDEL	304245	22923	35298	0.929935	0.896043	0.912674	6
HG002+HG003+HG004	NovaSeq	90	FALSE	GT	GATK4	AllTandemRepeatsandHomopolymers	SNV	179681	16269	26873	0.916974	0.869898	0.892816	6
HG002+HG003+HG004	NovaSeq	90	FALSE	GT	GATK4	AllTandemRepeatsandHomopolymers	INDEL	291452	40036	41223	0.879223	0.876086	0.877652	6
HG002+HG003+HG004	NovaSeq	90	FALSE	GT	FreeBayes	AllTandemRepeatsandHomopolymers	SNV	177229	19544	57712	0.900677	0.754355	0.821048	6
HG002+HG003+HG004	NovaSeq	90	FALSE	GT	FreeBayes	AllTandemRepeatsandHomopolymers	INDEL	271050	61834	67586	0.814248	0.800417	0.807273	6
HG002+HG003+HG004	NovaSeq	90	FALSE	GT	Octopus	notinAllTandemRepeatsandHomopolymers	SNV	3995047	183380	211877	0.956113	0.949636	0.952863	6
HG002+HG003+HG004	NovaSeq	90	FALSE	GT	Octopus	notinAllTandemRepeatsandHomopolymers	INDEL	229307	10628	14246	0.955705	0.941508	0.948553	6
HG002+HG003+HG004	NovaSeq	90	FALSE	GT	GATK4	notinAllTandemRepeatsandHomopolymers	SNV	3839695	339490	427227	0.918766	0.899875	0.909222	6
HG002+HG003+HG004	NovaSeq	90	FALSE	GT	GATK4	notinAllTandemRepeatsandHomopolymers	INDEL	220333	19656	24934	0.918096	0.898339	0.90811	6
HG002+HG003+HG004	NovaSeq	90	FALSE	GT	FreeBayes	notinAllTandemRepeatsandHomopolymers	SNV	3811670	368968	560018	0.911744	0.871899	0.891376	6
HG002+HG003+HG004	NovaSeq	90	FALSE	GT	FreeBayes	notinAllTandemRepeatsandHomopolymers	INDEL	208235	31831	93094	0.867407	0.691055	0.769254	6
HG002+HG003+HG004	NovaSeq	100	FALSE	GT	Octopus	genome	SNV	4208428	165550	199256	0.962151	0.954793	0.958458	6
HG002+HG003+HG004	NovaSeq	100	FALSE	GT	Octopus	genome	INDEL	537538	28921	43227	0.948944	0.925569	0.937111	6
HG002+HG003+HG004	NovaSeq	100	FALSE	GT	GATK4	genome	SNV	4064614	310507	408008	0.929029	0.908777	0.918791	6
HG002+HG003+HG004	NovaSeq	100	FALSE	GT	GATK4	genome	INDEL	518337	52539	58794	0.907968	0.898127	0.903021	6
HG002+HG003+HG004	NovaSeq	100	FALSE	GT	FreeBayes	genome	SNV	4032929	344486	565492	0.921304	0.877025	0.898619	6
HG002+HG003+HG004	NovaSeq	100	FALSE	GT	FreeBayes	genome	INDEL	485689	86680	139137	0.848559	0.777319	0.811378	6
HG002+HG003+HG004	NovaSeq	100	FALSE	GT	Octopus	alldifficult	SNV	697667	63453	83727	0.916632	0.892849	0.904584	6
HG002+HG003+HG004	NovaSeq	100	FALSE	GT	Octopus	alldifficult	INDEL	341637	22829	35108	0.937363	0.906812	0.921835	6
HG002+HG003+HG004	NovaSeq	100	FALSE	GT	GATK4	alldifficult	SNV	668747	92866	151098	0.878067	0.815699	0.845735	6
HG002+HG003+HG004	NovaSeq	100	FALSE	GT	GATK4	alldifficult	INDEL	328858	39979	43878	0.891608	0.882281	0.88692	6
HG002+HG003+HG004	NovaSeq	100	FALSE	GT	FreeBayes	alldifficult	SNV	664599	98199	186414	0.871265	0.78095	0.823639	6
HG002+HG003+HG004	NovaSeq	100	FALSE	GT	FreeBayes	alldifficult	INDEL	306669	63612	86515	0.828206	0.779963	0.803361	6
HG002+HG003+HG004	NovaSeq	100	FALSE	GT	Octopus	alllowmapandsegdup	SNV	271140	47065	61725	0.852092	0.814564	0.832906	6
HG002+HG003+HG004	NovaSeq	100	FALSE	GT	Octopus	alllowmapandsegdup	INDEL	15052	2594	3706	0.852998	0.802431	0.826942	6
HG002+HG003+HG004	NovaSeq	100	FALSE	GT	GATK4	alllowmapandsegdup	SNV	256107	62105	103812	0.804831	0.711568	0.755332	6
HG002+HG003+HG004	NovaSeq	100	FALSE	GT	GATK4	alllowmapandsegdup	INDEL	14209	3484	5863	0.803086	0.707902	0.752496	6
HG002+HG003+HG004	NovaSeq	100	FALSE	GT	FreeBayes	alllowmapandsegdup	SNV	256038	62398	90701	0.804049	0.738417	0.769837	6
HG002+HG003+HG004	NovaSeq	100	FALSE	GT	FreeBayes	alllowmapandsegdup	INDEL	13389	4331	15205	0.755587	0.468245	0.578184	6
HG002+HG003+HG004	NovaSeq	100	FALSE	GT	Octopus	notinalldifficult	SNV	3510761	102097	115529	0.971741	0.968141	0.969938	6
HG002+HG003+HG004	NovaSeq	100	FALSE	GT	Octopus	notinalldifficult	INDEL	196270	6114	8350	0.96979	0.959193	0.964462	6
HG002+HG003+HG004	NovaSeq	100	FALSE	GT	GATK4	notinalldifficult	SNV	3395867	217641	256910	0.93977	0.929667	0.934691	6
HG002+HG003+HG004	NovaSeq	100	FALSE	GT	GATK4	notinalldifficult	INDEL	189840	12590	14957	0.937806	0.926967	0.932355	6
HG002+HG003+HG004	NovaSeq	100	FALSE	GT	FreeBayes	notinalldifficult	SNV	3368330	246287	379078	0.931864	0.898843	0.915055	6
HG002+HG003+HG004	NovaSeq	100	FALSE	GT	FreeBayes	notinalldifficult	INDEL	179384	23096	62716	0.885934	0.74095	0.806982	6
HG002+HG003+HG004	NovaSeq	100	FALSE	GT	Octopus	notinalllowmapandsegdup	SNV	3937288	118485	137531	0.970786	0.966249	0.968512	6
HG002+HG003+HG004	NovaSeq	100	FALSE	GT	Octopus	notinalllowmapandsegdup	INDEL	522286	26314	39663	0.952034	0.929419	0.940591	6
HG002+HG003+HG004	NovaSeq	100	FALSE	GT	GATK4	notinalllowmapandsegdup	SNV	3808507	248402	304196	0.938771	0.926035	0.932359	6
HG002+HG003+HG004	NovaSeq	100	FALSE	GT	GATK4	notinalllowmapandsegdup	INDEL	503941	49031	52909	0.911332	0.904985	0.908147	6
HG002+HG003+HG004	NovaSeq	100	FALSE	GT	FreeBayes	notinalllowmapandsegdup	SNV	3776891	282088	474791	0.930503	0.888329	0.908927	6
HG002+HG003+HG004	NovaSeq	100	FALSE	GT	FreeBayes	notinalllowmapandsegdup	INDEL	472126	82312	124335	0.85154	0.791545	0.820447	6
HG002+HG003+HG004	NovaSeq	100	FALSE	GT	Octopus	AllTandemRepeatsandHomopolymers	SNV	187254	8290	12040	0.957605	0.939587	0.948511	6
HG002+HG003+HG004	NovaSeq	100	FALSE	GT	Octopus	AllTandemRepeatsandHomopolymers	INDEL	307290	19839	30710	0.939354	0.909142	0.924001	6
HG002+HG003+HG004	NovaSeq	100	FALSE	GT	GATK4	AllTandemRepeatsandHomopolymers	SNV	181789	14155	24432	0.92776	0.881525	0.904052	6
HG002+HG003+HG004	NovaSeq	100	FALSE	GT	GATK4	AllTandemRepeatsandHomopolymers	INDEL	295985	35503	36585	0.892898	0.889993	0.891443	6
HG002+HG003+HG004	NovaSeq	100	FALSE	GT	FreeBayes	AllTandemRepeatsandHomopolymers	SNV	179283	17494	54745	0.911097	0.766075	0.832316	6
HG002+HG003+HG004	NovaSeq	100	FALSE	GT	FreeBayes	AllTandemRepeatsandHomopolymers	INDEL	275654	57247	62987	0.828036	0.814001	0.820958	6
HG002+HG003+HG004	NovaSeq	100	FALSE	GT	Octopus	notinAllTandemRepeatsandHomopolymers	SNV	4021174	157260	187216	0.962364	0.955514	0.958927	6
HG002+HG003+HG004	NovaSeq	100	FALSE	GT	Octopus	notinAllTandemRepeatsandHomopolymers	INDEL	230812	9119	12682	0.961993	0.947917	0.954903	6
HG002+HG003+HG004	NovaSeq	100	FALSE	GT	GATK4	notinAllTandemRepeatsandHomopolymers	SNV	3882825	296352	383576	0.929088	0.910094	0.919493	6
HG002+HG003+HG004	NovaSeq	100	FALSE	GT	GATK4	notinAllTandemRepeatsandHomopolymers	INDEL	222894	17095	22287	0.928768	0.9091	0.918828	6
HG002+HG003+HG004	NovaSeq	100	FALSE	GT	FreeBayes	notinAllTandemRepeatsandHomopolymers	SNV	3853646	326992	510747	0.921784	0.882974	0.901962	6
HG002+HG003+HG004	NovaSeq	100	FALSE	GT	FreeBayes	notinAllTandemRepeatsandHomopolymers	INDEL	210577	29492	87057	0.877152	0.707503	0.783247	6
HG003+HG004	NovaSeq	10	FALSE	GT	Octopus	genome	SNV	2779752	1631048	829777	0.630215	0.770115	0.693177	4
HG003+HG004	NovaSeq	10	FALSE	GT	Octopus	genome	INDEL	364909	234359	183619	0.608925	0.665251	0.635843	4
HG003+HG004	NovaSeq	10	FALSE	GT	GATK4	genome	SNV	2888856	1521959	1119656	0.654948	0.72068	0.686244	4
HG003+HG004	NovaSeq	10	FALSE	GT	GATK4	genome	INDEL	342029	257246	170378	0.570738	0.667495	0.615336	4
HG003+HG004	NovaSeq	10	FALSE	GT	FreeBayes	genome	SNV	2907863	1503004	1661633	0.65925	0.636364	0.647605	4
HG003+HG004	NovaSeq	10	FALSE	GT	FreeBayes	genome	INDEL	322681	276621	245993	0.538428	0.567427	0.552547	4
HG003+HG004	NovaSeq	10	FALSE	GT	Octopus	alldifficult	SNV	461788	319145	150701	0.591329	0.753953	0.662811	4
HG003+HG004	NovaSeq	10	FALSE	GT	Octopus	alldifficult	INDEL	225118	170092	137053	0.569616	0.621579	0.594464	4
HG003+HG004	NovaSeq	10	FALSE	GT	GATK4	alldifficult	SNV	476996	303942	213300	0.610799	0.691002	0.64843	4
HG003+HG004	NovaSeq	10	FALSE	GT	GATK4	alldifficult	INDEL	207792	187425	121412	0.525767	0.631195	0.573677	4
HG003+HG004	NovaSeq	10	FALSE	GT	FreeBayes	alldifficult	SNV	483870	297112	339080	0.619566	0.58797	0.603355	4
HG003+HG004	NovaSeq	10	FALSE	GT	FreeBayes	alldifficult	INDEL	193924	201320	151799	0.490644	0.560923	0.523435	4
HG003+HG004	NovaSeq	10	FALSE	GT	Octopus	alllowmapandsegdup	SNV	177531	150743	67095	0.540801	0.725724	0.619763	4
HG003+HG004	NovaSeq	10	FALSE	GT	Octopus	alllowmapandsegdup	INDEL	10388	8159	4670	0.560091	0.689866	0.618241	4
HG003+HG004	NovaSeq	10	FALSE	GT	GATK4	alllowmapandsegdup	SNV	181834	146437	94409	0.553914	0.658239	0.601587	4
HG003+HG004	NovaSeq	10	FALSE	GT	GATK4	alllowmapandsegdup	INDEL	9853	8692	5488	0.531302	0.642266	0.581538	4
HG003+HG004	NovaSeq	10	FALSE	GT	FreeBayes	alllowmapandsegdup	SNV	187572	140705	125347	0.571383	0.599427	0.585069	4
HG003+HG004	NovaSeq	10	FALSE	GT	FreeBayes	alllowmapandsegdup	INDEL	9568	8979	14788	0.515879	0.39284	0.446029	4
HG003+HG004	NovaSeq	10	FALSE	GT	Octopus	notinalldifficult	SNV	2317964	1311903	679076	0.638581	0.773418	0.699561	4
HG003+HG004	NovaSeq	10	FALSE	GT	Octopus	notinalldifficult	INDEL	140024	64434	46638	0.684855	0.750147	0.716016	4
HG003+HG004	NovaSeq	10	FALSE	GT	GATK4	notinalldifficult	SNV	2411860	1218017	906356	0.664447	0.726854	0.694251	4
HG003+HG004	NovaSeq	10	FALSE	GT	GATK4	notinalldifficult	INDEL	134447	70011	49088	0.657578	0.732541	0.693038	4
HG003+HG004	NovaSeq	10	FALSE	GT	FreeBayes	notinalldifficult	SNV	2423993	1205892	1322553	0.667788	0.646994	0.657227	4
HG003+HG004	NovaSeq	10	FALSE	GT	FreeBayes	notinalldifficult	INDEL	128949	75509	129004	0.630687	0.499893	0.557725	4
HG003+HG004	NovaSeq	10	FALSE	GT	Octopus	notinalllowmapandsegdup	SNV	2602221	1480305	762682	0.637405	0.773342	0.698824	4
HG003+HG004	NovaSeq	10	FALSE	GT	Octopus	notinalllowmapandsegdup	INDEL	354367	226137	178921	0.610447	0.664495	0.636325	4
HG003+HG004	NovaSeq	10	FALSE	GT	GATK4	notinalllowmapandsegdup	SNV	2707022	1375522	1025247	0.663072	0.725302	0.692793	4
HG003+HG004	NovaSeq	10	FALSE	GT	GATK4	notinalllowmapandsegdup	INDEL	332032	248481	164847	0.571963	0.668235	0.616362	4
HG003+HG004	NovaSeq	10	FALSE	GT	FreeBayes	notinalllowmapandsegdup	SNV	2720291	1362299	1536286	0.666315	0.639079	0.652413	4
HG003+HG004	NovaSeq	10	FALSE	GT	FreeBayes	notinalllowmapandsegdup	INDEL	312971	267567	231855	0.539105	0.574442	0.556213	4
HG003+HG004	NovaSeq	10	FALSE	GT	Octopus	AllTandemRepeatsandHomopolymers	SNV	124869	79275	38140	0.611671	0.766025	0.680201	4
HG003+HG004	NovaSeq	10	FALSE	GT	Octopus	AllTandemRepeatsandHomopolymers	INDEL	200993	155994	128530	0.563026	0.609951	0.58555	4
HG003+HG004	NovaSeq	10	FALSE	GT	GATK4	AllTandemRepeatsandHomopolymers	SNV	129889	74260	54992	0.636246	0.702555	0.667758	4
HG003+HG004	NovaSeq	10	FALSE	GT	GATK4	AllTandemRepeatsandHomopolymers	INDEL	184699	172297	111471	0.51737	0.623625	0.56555	4
HG003+HG004	NovaSeq	10	FALSE	GT	FreeBayes	AllTandemRepeatsandHomopolymers	SNV	129749	74434	109478	0.635454	0.542368	0.585233	4
HG003+HG004	NovaSeq	10	FALSE	GT	FreeBayes	AllTandemRepeatsandHomopolymers	INDEL	171695	185326	127167	0.48091	0.574496	0.523554	4
HG003+HG004	NovaSeq	10	FALSE	GT	Octopus	notinAllTandemRepeatsandHomopolymers	SNV	2654883	1551773	791637	0.631115	0.770308	0.693799	4
HG003+HG004	NovaSeq	10	FALSE	GT	Octopus	notinAllTandemRepeatsandHomopolymers	INDEL	164280	78623	55187	0.676319	0.748541	0.7106	4
HG003+HG004	NovaSeq	10	FALSE	GT	GATK4	notinAllTandemRepeatsandHomopolymers	SNV	2758967	1447699	1064664	0.655856	0.721557	0.687139	4
HG003+HG004	NovaSeq	10	FALSE	GT	GATK4	notinAllTandemRepeatsandHomopolymers	INDEL	157666	85235	59075	0.649096	0.72744	0.686038	4
HG003+HG004	NovaSeq	10	FALSE	GT	FreeBayes	notinAllTandemRepeatsandHomopolymers	SNV	2778114	1428570	1552155	0.660405	0.641557	0.650844	4
HG003+HG004	NovaSeq	10	FALSE	GT	FreeBayes	notinAllTandemRepeatsandHomopolymers	INDEL	151296	91607	156480	0.622866	0.491578	0.549489	4
HG003+HG004	NovaSeq	20	FALSE	GT	Octopus	genome	SNV	3759738	650842	424785	0.852436	0.898487	0.874856	4
HG003+HG004	NovaSeq	20	FALSE	GT	Octopus	genome	INDEL	500121	99087	117295	0.834637	0.810023	0.822146	4
HG003+HG004	NovaSeq	20	FALSE	GT	GATK4	genome	SNV	3706781	703999	718524	0.840391	0.837633	0.83901	4
HG003+HG004	NovaSeq	20	FALSE	GT	GATK4	genome	INDEL	472380	126855	122073	0.788305	0.794647	0.791463	4
HG003+HG004	NovaSeq	20	FALSE	GT	FreeBayes	genome	SNV	3712588	698279	1417781	0.841691	0.723649	0.77822	4
HG003+HG004	NovaSeq	20	FALSE	GT	FreeBayes	genome	INDEL	444515	154787	245592	0.741721	0.644125	0.689486	4
HG003+HG004	NovaSeq	20	FALSE	GT	Octopus	alldifficult	SNV	630569	150295	91915	0.807527	0.872779	0.838886	4
HG003+HG004	NovaSeq	20	FALSE	GT	Octopus	alldifficult	INDEL	318940	76217	89438	0.807122	0.780992	0.793842	4
HG003+HG004	NovaSeq	20	FALSE	GT	GATK4	alldifficult	SNV	620940	159968	166002	0.795151	0.789054	0.792091	4
HG003+HG004	NovaSeq	20	FALSE	GT	GATK4	alldifficult	INDEL	299239	95939	85969	0.757226	0.776824	0.7669	4
HG003+HG004	NovaSeq	20	FALSE	GT	FreeBayes	alldifficult	SNV	624407	156575	315088	0.799515	0.66462	0.725853	4
HG003+HG004	NovaSeq	20	FALSE	GT	FreeBayes	alldifficult	INDEL	277445	117799	139120	0.701959	0.666031	0.683523	4
HG003+HG004	NovaSeq	20	FALSE	GT	Octopus	alllowmapandsegdup	SNV	244175	84091	49475	0.743833	0.831517	0.785235	4
HG003+HG004	NovaSeq	20	FALSE	GT	Octopus	alllowmapandsegdup	INDEL	14086	4459	3739	0.759558	0.790238	0.774594	4
HG003+HG004	NovaSeq	20	FALSE	GT	GATK4	alllowmapandsegdup	SNV	240037	88236	86942	0.731212	0.734105	0.732656	4
HG003+HG004	NovaSeq	20	FALSE	GT	GATK4	alllowmapandsegdup	INDEL	13182	5361	5398	0.710888	0.709473	0.71018	4
HG003+HG004	NovaSeq	20	FALSE	GT	FreeBayes	alllowmapandsegdup	SNV	244814	83463	125460	0.745754	0.66117	0.700919	4
HG003+HG004	NovaSeq	20	FALSE	GT	FreeBayes	alllowmapandsegdup	INDEL	12885	5662	18259	0.694722	0.413723	0.518605	4
HG003+HG004	NovaSeq	20	FALSE	GT	Octopus	notinalldifficult	SNV	3129169	500547	332870	0.862097	0.903851	0.882481	4
HG003+HG004	NovaSeq	20	FALSE	GT	Octopus	notinalldifficult	INDEL	181486	22965	27969	0.887675	0.866468	0.876943	4
HG003+HG004	NovaSeq	20	FALSE	GT	GATK4	notinalldifficult	SNV	3085841	544031	552522	0.850124	0.84814	0.849131	4
HG003+HG004	NovaSeq	20	FALSE	GT	GATK4	notinalldifficult	INDEL	173453	31004	36208	0.848359	0.827302	0.837698	4
HG003+HG004	NovaSeq	20	FALSE	GT	FreeBayes	notinalldifficult	SNV	3088181	541704	1102693	0.850766	0.736882	0.789739	4
HG003+HG004	NovaSeq	20	FALSE	GT	FreeBayes	notinalldifficult	INDEL	167368	37090	134211	0.818594	0.554972	0.661485	4
HG003+HG004	NovaSeq	20	FALSE	GT	Octopus	notinalllowmapandsegdup	SNV	3515563	566751	375310	0.861169	0.903541	0.881846	4
HG003+HG004	NovaSeq	20	FALSE	GT	Octopus	notinalllowmapandsegdup	INDEL	485837	94609	113570	0.837006	0.810529	0.823555	4
HG003+HG004	NovaSeq	20	FALSE	GT	GATK4	notinalllowmapandsegdup	SNV	3466744	615763	631582	0.84917	0.845893	0.847528	4
HG003+HG004	NovaSeq	20	FALSE	GT	GATK4	notinalllowmapandsegdup	INDEL	459009	121466	116662	0.790747	0.797346	0.794033	4
HG003+HG004	NovaSeq	20	FALSE	GT	FreeBayes	notinalllowmapandsegdup	SNV	3467774	614816	1292321	0.849405	0.728509	0.784326	4
HG003+HG004	NovaSeq	20	FALSE	GT	FreeBayes	notinalllowmapandsegdup	INDEL	431448	149090	227999	0.743186	0.654257	0.695892	4
HG003+HG004	NovaSeq	20	FALSE	GT	Octopus	AllTandemRepeatsandHomopolymers	SNV	171898	32193	20039	0.842262	0.895596	0.86811	4
HG003+HG004	NovaSeq	20	FALSE	GT	Octopus	AllTandemRepeatsandHomopolymers	INDEL	287074	69860	83544	0.804278	0.774582	0.78915	4
HG003+HG004	NovaSeq	20	FALSE	GT	GATK4	AllTandemRepeatsandHomopolymers	SNV	170213	33902	38276	0.833907	0.816412	0.825067	4
HG003+HG004	NovaSeq	20	FALSE	GT	GATK4	AllTandemRepeatsandHomopolymers	INDEL	269037	87920	77306	0.753696	0.776794	0.76507	4
HG003+HG004	NovaSeq	20	FALSE	GT	FreeBayes	AllTandemRepeatsandHomopolymers	SNV	168440	35743	99949	0.824946	0.627597	0.712865	4
HG003+HG004	NovaSeq	20	FALSE	GT	FreeBayes	AllTandemRepeatsandHomopolymers	INDEL	248085	108936	108325	0.694875	0.696066	0.69547	4
HG003+HG004	NovaSeq	20	FALSE	GT	Octopus	notinAllTandemRepeatsandHomopolymers	SNV	3587840	618649	404746	0.85293	0.898626	0.875182	4
HG003+HG004	NovaSeq	20	FALSE	GT	Octopus	notinAllTandemRepeatsandHomopolymers	INDEL	213555	29341	33853	0.879203	0.863169	0.871113	4
HG003+HG004	NovaSeq	20	FALSE	GT	GATK4	notinAllTandemRepeatsandHomopolymers	SNV	3536568	670097	680248	0.840706	0.838682	0.839693	4
HG003+HG004	NovaSeq	20	FALSE	GT	GATK4	notinAllTandemRepeatsandHomopolymers	INDEL	203844	39056	44895	0.83921	0.81951	0.829243	4
HG003+HG004	NovaSeq	20	FALSE	GT	FreeBayes	notinAllTandemRepeatsandHomopolymers	SNV	3544148	662536	1317832	0.842504	0.728952	0.781625	4
HG003+HG004	NovaSeq	20	FALSE	GT	FreeBayes	notinAllTandemRepeatsandHomopolymers	INDEL	196904	45999	167130	0.810628	0.540895	0.648845	4
HG003+HG004	NovaSeq	30	FALSE	GT	Octopus	genome	SNV	4113701	296872	252993	0.932691	0.942063	0.937354	4
HG003+HG004	NovaSeq	30	FALSE	GT	Octopus	genome	INDEL	547025	52160	72259	0.912948	0.883318	0.897889	4
HG003+HG004	NovaSeq	30	FALSE	GT	GATK4	genome	SNV	3974576	436188	489714	0.901108	0.890304	0.895674	4
HG003+HG004	NovaSeq	30	FALSE	GT	GATK4	genome	INDEL	521503	77719	86389	0.8703	0.857888	0.864049	4
HG003+HG004	NovaSeq	30	FALSE	GT	FreeBayes	genome	SNV	3967784	443074	992527	0.899549	0.799906	0.846807	4
HG003+HG004	NovaSeq	30	FALSE	GT	FreeBayes	genome	INDEL	492863	106431	202275	0.822406	0.709015	0.761512	4
HG003+HG004	NovaSeq	30	FALSE	GT	Octopus	alldifficult	SNV	694036	86815	68796	0.88882	0.909815	0.899195	4
HG003+HG004	NovaSeq	30	FALSE	GT	Octopus	alldifficult	INDEL	354009	41124	56338	0.895924	0.862706	0.879001	4
HG003+HG004	NovaSeq	30	FALSE	GT	GATK4	alldifficult	SNV	668733	112165	136728	0.856364	0.830249	0.843104	4
HG003+HG004	NovaSeq	30	FALSE	GT	GATK4	alldifficult	INDEL	335786	59380	59541	0.849734	0.849388	0.849561	4
HG003+HG004	NovaSeq	30	FALSE	GT	FreeBayes	alldifficult	SNV	669636	111338	238592	0.857437	0.737299	0.792843	4
HG003+HG004	NovaSeq	30	FALSE	GT	FreeBayes	alldifficult	INDEL	313420	81817	113990	0.792993	0.733301	0.761979	4
HG003+HG004	NovaSeq	30	FALSE	GT	Octopus	alllowmapandsegdup	SNV	271419	56852	43415	0.826814	0.862102	0.844089	4
HG003+HG004	NovaSeq	30	FALSE	GT	Octopus	alllowmapandsegdup	INDEL	15324	3221	3017	0.826314	0.835505	0.830884	4
HG003+HG004	NovaSeq	30	FALSE	GT	GATK4	alllowmapandsegdup	SNV	260032	68241	81597	0.792121	0.761153	0.776328	4
HG003+HG004	NovaSeq	30	FALSE	GT	GATK4	alllowmapandsegdup	INDEL	14490	4053	5093	0.781427	0.739927	0.760111	4
HG003+HG004	NovaSeq	30	FALSE	GT	FreeBayes	alllowmapandsegdup	SNV	263295	64982	104916	0.802051	0.715066	0.756065	4
HG003+HG004	NovaSeq	30	FALSE	GT	FreeBayes	alllowmapandsegdup	INDEL	14078	4469	17289	0.759045	0.448816	0.56409	4
HG003+HG004	NovaSeq	30	FALSE	GT	Octopus	notinalldifficult	SNV	3419665	210057	184197	0.942129	0.948889	0.945497	4
HG003+HG004	NovaSeq	30	FALSE	GT	Octopus	notinalldifficult	INDEL	193382	11070	16049	0.945855	0.923369	0.934477	4
HG003+HG004	NovaSeq	30	FALSE	GT	GATK4	notinalldifficult	SNV	3305843	324023	352986	0.910734	0.903525	0.907115	4
HG003+HG004	NovaSeq	30	FALSE	GT	GATK4	notinalldifficult	INDEL	186064	18392	26922	0.910044	0.873597	0.891448	4
HG003+HG004	NovaSeq	30	FALSE	GT	FreeBayes	notinalldifficult	SNV	3298148	331736	753935	0.90861	0.813939	0.858673	4
HG003+HG004	NovaSeq	30	FALSE	GT	FreeBayes	notinalldifficult	INDEL	179813	24644	109353	0.879466	0.621833	0.728544	4
HG003+HG004	NovaSeq	30	FALSE	GT	Octopus	notinalllowmapandsegdup	SNV	3842282	240020	209578	0.941205	0.948276	0.944727	4
HG003+HG004	NovaSeq	30	FALSE	GT	Octopus	notinalllowmapandsegdup	INDEL	531496	48927	69294	0.915705	0.884662	0.899916	4
HG003+HG004	NovaSeq	30	FALSE	GT	GATK4	notinalllowmapandsegdup	SNV	3714544	367947	408117	0.909872	0.901006	0.905417	4
HG003+HG004	NovaSeq	30	FALSE	GT	GATK4	notinalllowmapandsegdup	INDEL	506813	73649	81281	0.87312	0.861789	0.867418	4
HG003+HG004	NovaSeq	30	FALSE	GT	FreeBayes	notinalllowmapandsegdup	SNV	3704489	378092	887611	0.907389	0.806709	0.854092	4
HG003+HG004	NovaSeq	30	FALSE	GT	FreeBayes	notinalllowmapandsegdup	INDEL	478601	101929	185538	0.824421	0.720634	0.769041	4
HG003+HG004	NovaSeq	30	FALSE	GT	Octopus	AllTandemRepeatsandHomopolymers	SNV	189122	14951	12507	0.926737	0.93797	0.93232	4
HG003+HG004	NovaSeq	30	FALSE	GT	Octopus	AllTandemRepeatsandHomopolymers	INDEL	319823	37087	52119	0.896089	0.859873	0.877608	4
HG003+HG004	NovaSeq	30	FALSE	GT	GATK4	AllTandemRepeatsandHomopolymers	SNV	183280	20826	27578	0.897965	0.869211	0.883354	4
HG003+HG004	NovaSeq	30	FALSE	GT	GATK4	AllTandemRepeatsandHomopolymers	INDEL	303133	53812	52016	0.849243	0.853538	0.851385	4
HG003+HG004	NovaSeq	30	FALSE	GT	FreeBayes	AllTandemRepeatsandHomopolymers	SNV	181175	23001	72510	0.887347	0.714173	0.791397	4
HG003+HG004	NovaSeq	30	FALSE	GT	FreeBayes	AllTandemRepeatsandHomopolymers	INDEL	281682	75332	85776	0.788994	0.766569	0.77762	4
HG003+HG004	NovaSeq	30	FALSE	GT	Octopus	notinAllTandemRepeatsandHomopolymers	SNV	3924579	281921	240486	0.93298	0.942261	0.937597	4
HG003+HG004	NovaSeq	30	FALSE	GT	Octopus	notinAllTandemRepeatsandHomopolymers	INDEL	227779	15118	20241	0.93776	0.91839	0.927974	4
HG003+HG004	NovaSeq	30	FALSE	GT	GATK4	notinAllTandemRepeatsandHomopolymers	SNV	3791296	415362	462136	0.901261	0.89135	0.896278	4
HG003+HG004	NovaSeq	30	FALSE	GT	GATK4	notinAllTandemRepeatsandHomopolymers	INDEL	218925	23974	34470	0.901301	0.863967	0.882239	4
HG003+HG004	NovaSeq	30	FALSE	GT	FreeBayes	notinAllTandemRepeatsandHomopolymers	SNV	3786609	420073	920017	0.900141	0.804527	0.849653	4
HG003+HG004	NovaSeq	30	FALSE	GT	FreeBayes	notinAllTandemRepeatsandHomopolymers	INDEL	211728	31174	139063	0.87166	0.603573	0.713258	4
HG003+HG004	NovaSeq	40	FALSE	GT	Octopus	genome	SNV	4236411	174115	169605	0.960523	0.961506	0.961014	4
HG003+HG004	NovaSeq	40	FALSE	GT	Octopus	genome	INDEL	566773	32412	47514	0.945907	0.922652	0.934134	4
HG003+HG004	NovaSeq	40	FALSE	GT	GATK4	genome	SNV	4109651	301103	362727	0.931734	0.918896	0.925271	4
HG003+HG004	NovaSeq	40	FALSE	GT	GATK4	genome	INDEL	545792	53420	59615	0.91085	0.901529	0.906165	4
HG003+HG004	NovaSeq	40	FALSE	GT	FreeBayes	genome	SNV	4095107	315749	610040	0.928415	0.870346	0.898444	4
HG003+HG004	NovaSeq	40	FALSE	GT	FreeBayes	genome	INDEL	517959	81330	147989	0.864289	0.777777	0.818754	4
HG003+HG004	NovaSeq	40	FALSE	GT	Octopus	alldifficult	SNV	717713	63125	57584	0.919157	0.925727	0.92243	4
HG003+HG004	NovaSeq	40	FALSE	GT	Octopus	alldifficult	INDEL	369031	26107	38079	0.933929	0.906465	0.919992	4
HG003+HG004	NovaSeq	40	FALSE	GT	GATK4	alldifficult	SNV	693039	87849	119086	0.887501	0.853365	0.870098	4
HG003+HG004	NovaSeq	40	FALSE	GT	GATK4	alldifficult	INDEL	354000	41156	42948	0.895849	0.891804	0.893822	4
HG003+HG004	NovaSeq	40	FALSE	GT	FreeBayes	alldifficult	SNV	691992	88980	176549	0.886065	0.796729	0.839026	4
HG003+HG004	NovaSeq	40	FALSE	GT	FreeBayes	alldifficult	INDEL	332512	62720	88329	0.841308	0.790113	0.814907	4
HG003+HG004	NovaSeq	40	FALSE	GT	Octopus	alllowmapandsegdup	SNV	281974	46283	40884	0.859004	0.873368	0.866127	4
HG003+HG004	NovaSeq	40	FALSE	GT	Octopus	alllowmapandsegdup	INDEL	15905	2640	2605	0.857644	0.859265	0.858454	4
HG003+HG004	NovaSeq	40	FALSE	GT	GATK4	alllowmapandsegdup	SNV	270031	58238	77398	0.822591	0.777226	0.799265	4
HG003+HG004	NovaSeq	40	FALSE	GT	GATK4	alllowmapandsegdup	INDEL	15153	3390	4618	0.817182	0.766426	0.79099	4
HG003+HG004	NovaSeq	40	FALSE	GT	FreeBayes	alllowmapandsegdup	SNV	272067	56210	84320	0.828773	0.763403	0.794746	4
HG003+HG004	NovaSeq	40	FALSE	GT	FreeBayes	alllowmapandsegdup	INDEL	14588	3959	14756	0.786542	0.497137	0.609217	4
HG003+HG004	NovaSeq	40	FALSE	GT	Octopus	notinalldifficult	SNV	3518698	110990	112021	0.969422	0.969146	0.969284	4
HG003+HG004	NovaSeq	40	FALSE	GT	Octopus	notinalldifficult	INDEL	198133	6314	9515	0.969117	0.954177	0.961589	4
HG003+HG004	NovaSeq	40	FALSE	GT	GATK4	notinalldifficult	SNV	3416612	213254	243641	0.94125	0.933436	0.937327	4
HG003+HG004	NovaSeq	40	FALSE	GT	GATK4	notinalldifficult	INDEL	192173	12283	16695	0.939924	0.920069	0.92989	4
HG003+HG004	NovaSeq	40	FALSE	GT	FreeBayes	notinalldifficult	SNV	3403115	226769	433491	0.937527	0.887012	0.91157	4
HG003+HG004	NovaSeq	40	FALSE	GT	FreeBayes	notinalldifficult	INDEL	185845	18612	74690	0.908969	0.713321	0.799347	4
HG003+HG004	NovaSeq	40	FALSE	GT	Octopus	notinalllowmapandsegdup	SNV	3954437	127832	128721	0.968686	0.968475	0.968581	4
HG003+HG004	NovaSeq	40	FALSE	GT	Octopus	notinalllowmapandsegdup	INDEL	550661	29762	44955	0.948724	0.924524	0.936467	4
HG003+HG004	NovaSeq	40	FALSE	GT	GATK4	notinalllowmapandsegdup	SNV	3839620	242865	285329	0.94051	0.930828	0.935644	4
HG003+HG004	NovaSeq	40	FALSE	GT	GATK4	notinalllowmapandsegdup	INDEL	530435	50017	54981	0.913831	0.906082	0.90994	4
HG003+HG004	NovaSeq	40	FALSE	GT	FreeBayes	notinalllowmapandsegdup	SNV	3823040	259539	525720	0.936428	0.87911	0.906864	4
HG003+HG004	NovaSeq	40	FALSE	GT	FreeBayes	notinalllowmapandsegdup	INDEL	503184	77341	133668	0.866774	0.790111	0.826669	4
HG003+HG004	NovaSeq	40	FALSE	GT	Octopus	AllTandemRepeatsandHomopolymers	SNV	195408	8673	8689	0.957502	0.957427	0.957465	4
HG003+HG004	NovaSeq	40	FALSE	GT	Octopus	AllTandemRepeatsandHomopolymers	INDEL	333843	23072	34863	0.935357	0.905445	0.920158	4
HG003+HG004	NovaSeq	40	FALSE	GT	GATK4	AllTandemRepeatsandHomopolymers	SNV	190087	14013	21196	0.931342	0.89968	0.915237	4
HG003+HG004	NovaSeq	40	FALSE	GT	GATK4	AllTandemRepeatsandHomopolymers	INDEL	320148	36787	36700	0.896936	0.897155	0.897046	4
HG003+HG004	NovaSeq	40	FALSE	GT	FreeBayes	AllTandemRepeatsandHomopolymers	SNV	187811	16363	52477	0.919858	0.781608	0.845116	4
HG003+HG004	NovaSeq	40	FALSE	GT	FreeBayes	AllTandemRepeatsandHomopolymers	INDEL	299759	57250	65019	0.83964	0.821757	0.830602	4
HG003+HG004	NovaSeq	40	FALSE	GT	Octopus	notinAllTandemRepeatsandHomopolymers	SNV	4041003	165442	160916	0.960669	0.961704	0.961187	4
HG003+HG004	NovaSeq	40	FALSE	GT	Octopus	notinAllTandemRepeatsandHomopolymers	INDEL	233534	9358	12710	0.961473	0.948385	0.954884	4
HG003+HG004	NovaSeq	40	FALSE	GT	GATK4	notinAllTandemRepeatsandHomopolymers	SNV	3919564	287090	341531	0.931753	0.919849	0.925763	4
HG003+HG004	NovaSeq	40	FALSE	GT	GATK4	notinAllTandemRepeatsandHomopolymers	INDEL	226233	16666	22971	0.931387	0.907823	0.919454	4
HG003+HG004	NovaSeq	40	FALSE	GT	FreeBayes	notinAllTandemRepeatsandHomopolymers	SNV	3907296	299386	557563	0.928831	0.875122	0.901177	4
HG003+HG004	NovaSeq	40	FALSE	GT	FreeBayes	notinAllTandemRepeatsandHomopolymers	INDEL	218781	24121	99099	0.900697	0.68825	0.780271	4
HG003+HG004	NovaSeq	50	FALSE	GT	Octopus	genome	SNV	4290902	119479	125167	0.97291	0.971656	0.972283	4
HG003+HG004	NovaSeq	50	FALSE	GT	Octopus	genome	INDEL	577144	22015	32983	0.963257	0.945941	0.95452	4
HG003+HG004	NovaSeq	50	FALSE	GT	GATK4	genome	SNV	4188855	221897	281908	0.949692	0.936944	0.943275	4
HG003+HG004	NovaSeq	50	FALSE	GT	GATK4	genome	INDEL	560023	39184	43575	0.934607	0.927808	0.931195	4
HG003+HG004	NovaSeq	50	FALSE	GT	FreeBayes	genome	SNV	4172741	238117	436220	0.946016	0.905354	0.925238	4
HG003+HG004	NovaSeq	50	FALSE	GT	FreeBayes	genome	INDEL	533876	65418	117575	0.890842	0.819518	0.853693	4
HG003+HG004	NovaSeq	50	FALSE	GT	Octopus	alldifficult	SNV	728927	51891	51606	0.933543	0.933884	0.933713	4
HG003+HG004	NovaSeq	50	FALSE	GT	Octopus	alldifficult	INDEL	377048	18071	27262	0.954264	0.932572	0.943293	4
HG003+HG004	NovaSeq	50	FALSE	GT	GATK4	alldifficult	SNV	707072	73814	106876	0.905474	0.868694	0.886703	4
HG003+HG004	NovaSeq	50	FALSE	GT	GATK4	alldifficult	INDEL	364477	30674	32932	0.922374	0.917133	0.919746	4
HG003+HG004	NovaSeq	50	FALSE	GT	FreeBayes	alldifficult	SNV	705791	75183	146132	0.903732	0.828468	0.864465	4
HG003+HG004	NovaSeq	50	FALSE	GT	FreeBayes	alldifficult	INDEL	344813	50424	72288	0.872421	0.826689	0.84894	4
HG003+HG004	NovaSeq	50	FALSE	GT	Octopus	alllowmapandsegdup	SNV	287376	40878	39508	0.875468	0.879138	0.877299	4
HG003+HG004	NovaSeq	50	FALSE	GT	Octopus	alllowmapandsegdup	INDEL	16163	2382	2442	0.871556	0.868745	0.870148	4
HG003+HG004	NovaSeq	50	FALSE	GT	GATK4	alllowmapandsegdup	SNV	275839	52430	73948	0.840283	0.788591	0.813617	4
HG003+HG004	NovaSeq	50	FALSE	GT	GATK4	alllowmapandsegdup	INDEL	15420	3123	4380	0.831581	0.778788	0.804319	4
HG003+HG004	NovaSeq	50	FALSE	GT	FreeBayes	alllowmapandsegdup	SNV	277286	50991	73502	0.844671	0.790466	0.81667	4
HG003+HG004	NovaSeq	50	FALSE	GT	FreeBayes	alllowmapandsegdup	INDEL	14915	3632	13357	0.804173	0.527554	0.637134	4
HG003+HG004	NovaSeq	50	FALSE	GT	Octopus	notinalldifficult	SNV	3561975	67588	73561	0.981378	0.979766	0.980572	4
HG003+HG004	NovaSeq	50	FALSE	GT	Octopus	notinalldifficult	INDEL	200481	3959	5811	0.980635	0.971831	0.976213	4
HG003+HG004	NovaSeq	50	FALSE	GT	GATK4	notinalldifficult	SNV	3481783	148083	175032	0.959204	0.952135	0.955657	4
HG003+HG004	NovaSeq	50	FALSE	GT	GATK4	notinalldifficult	INDEL	195937	8518	10653	0.958338	0.948434	0.95336	4
HG003+HG004	NovaSeq	50	FALSE	GT	FreeBayes	notinalldifficult	SNV	3466950	162934	290088	0.955113	0.922788	0.938672	4
HG003+HG004	NovaSeq	50	FALSE	GT	FreeBayes	notinalldifficult	INDEL	189465	14992	56237	0.926674	0.771117	0.841769	4
HG003+HG004	NovaSeq	50	FALSE	GT	Octopus	notinalllowmapandsegdup	SNV	4003526	78601	85659	0.980745	0.979052	0.979898	4
HG003+HG004	NovaSeq	50	FALSE	GT	Octopus	notinalllowmapandsegdup	INDEL	560768	19629	30601	0.96618	0.948254	0.957133	4
HG003+HG004	NovaSeq	50	FALSE	GT	GATK4	notinalllowmapandsegdup	SNV	3913016	169467	207960	0.958489	0.949536	0.953992	4
HG003+HG004	NovaSeq	50	FALSE	GT	GATK4	notinalllowmapandsegdup	INDEL	544399	36048	39179	0.937896	0.932864	0.935373	4
HG003+HG004	NovaSeq	50	FALSE	GT	FreeBayes	notinalllowmapandsegdup	SNV	3895455	187126	362718	0.954165	0.914818	0.934077	4
HG003+HG004	NovaSeq	50	FALSE	GT	FreeBayes	notinalllowmapandsegdup	INDEL	518773	61757	104564	0.89362	0.832251	0.861844	4
HG003+HG004	NovaSeq	50	FALSE	GT	Octopus	AllTandemRepeatsandHomopolymers	SNV	198356	5718	6667	0.971981	0.967482	0.969726	4
HG003+HG004	NovaSeq	50	FALSE	GT	Octopus	AllTandemRepeatsandHomopolymers	INDEL	341370	15528	24489	0.956492	0.933064	0.944633	4
HG003+HG004	NovaSeq	50	FALSE	GT	GATK4	AllTandemRepeatsandHomopolymers	SNV	193983	10115	17085	0.95044	0.919055	0.934484	4
HG003+HG004	NovaSeq	50	FALSE	GT	GATK4	AllTandemRepeatsandHomopolymers	INDEL	329941	26989	27482	0.924386	0.923111	0.923748	4
HG003+HG004	NovaSeq	50	FALSE	GT	FreeBayes	AllTandemRepeatsandHomopolymers	SNV	192102	12074	42817	0.940865	0.817737	0.874991	4
HG003+HG004	NovaSeq	50	FALSE	GT	FreeBayes	AllTandemRepeatsandHomopolymers	INDEL	311435	45579	51638	0.872333	0.857775	0.864993	4
HG003+HG004	NovaSeq	50	FALSE	GT	Octopus	notinAllTandemRepeatsandHomopolymers	SNV	4092546	113761	118500	0.972955	0.97186	0.972407	4
HG003+HG004	NovaSeq	50	FALSE	GT	Octopus	notinAllTandemRepeatsandHomopolymers	INDEL	236376	6507	8552	0.973209	0.965084	0.969129	4
HG003+HG004	NovaSeq	50	FALSE	GT	GATK4	notinAllTandemRepeatsandHomopolymers	SNV	3994872	211782	264823	0.949655	0.937831	0.943706	4
HG003+HG004	NovaSeq	50	FALSE	GT	GATK4	notinAllTandemRepeatsandHomopolymers	INDEL	230676	12222	16132	0.949683	0.934637	0.9421	4
HG003+HG004	NovaSeq	50	FALSE	GT	FreeBayes	notinAllTandemRepeatsandHomopolymers	SNV	3980639	226043	393403	0.946266	0.91006	0.92781	4
HG003+HG004	NovaSeq	50	FALSE	GT	FreeBayes	notinAllTandemRepeatsandHomopolymers	INDEL	223025	19877	77708	0.918169	0.741605	0.820495	4
HG003+HG004	NovaSeq	60	FALSE	GT	Octopus	genome	SNV	4320583	89712	99729	0.979659	0.977438	0.978547	4
HG003+HG004	NovaSeq	60	FALSE	GT	Octopus	genome	INDEL	583084	16066	24655	0.973185	0.959432	0.96626	4
HG003+HG004	NovaSeq	60	FALSE	GT	GATK4	genome	SNV	4240917	169839	230169	0.961494	0.948521	0.954963	4
HG003+HG004	NovaSeq	60	FALSE	GT	GATK4	genome	INDEL	569378	29831	33875	0.950216	0.943846	0.94702	4
HG003+HG004	NovaSeq	60	FALSE	GT	FreeBayes	genome	SNV	4224238	186626	354509	0.957689	0.922575	0.939804	4
HG003+HG004	NovaSeq	60	FALSE	GT	FreeBayes	genome	INDEL	544494	54799	100623	0.908561	0.844024	0.875104	4
HG003+HG004	NovaSeq	60	FALSE	GT	Octopus	alldifficult	SNV	735110	45650	48788	0.941531	0.937762	0.939643	4
HG003+HG004	NovaSeq	60	FALSE	GT	Octopus	alldifficult	INDEL	381663	13451	20826	0.965957	0.948257	0.957025	4
HG003+HG004	NovaSeq	60	FALSE	GT	GATK4	alldifficult	SNV	716878	64012	99295	0.918027	0.878341	0.897745	4
HG003+HG004	NovaSeq	60	FALSE	GT	GATK4	alldifficult	INDEL	371561	23592	25995	0.940297	0.934613	0.937446	4
HG003+HG004	NovaSeq	60	FALSE	GT	FreeBayes	alldifficult	SNV	715102	65877	130644	0.915648	0.845528	0.879192	4
HG003+HG004	NovaSeq	60	FALSE	GT	FreeBayes	alldifficult	INDEL	353015	42220	62432	0.893177	0.849723	0.870909	4
HG003+HG004	NovaSeq	60	FALSE	GT	Octopus	alllowmapandsegdup	SNV	290443	37804	39148	0.884831	0.881222	0.883023	4
HG003+HG004	NovaSeq	60	FALSE	GT	Octopus	alllowmapandsegdup	INDEL	16331	2214	2393	0.880615	0.872196	0.876385	4
HG003+HG004	NovaSeq	60	FALSE	GT	GATK4	alllowmapandsegdup	SNV	280047	48222	72029	0.853102	0.795416	0.82325	4
HG003+HG004	NovaSeq	60	FALSE	GT	GATK4	alllowmapandsegdup	INDEL	15652	2891	4224	0.844092	0.787482	0.814805	4
HG003+HG004	NovaSeq	60	FALSE	GT	FreeBayes	alllowmapandsegdup	SNV	281094	47183	67793	0.856271	0.805688	0.83021	4
HG003+HG004	NovaSeq	60	FALSE	GT	FreeBayes	alllowmapandsegdup	INDEL	15144	3403	12617	0.81652	0.545513	0.654055	4
HG003+HG004	NovaSeq	60	FALSE	GT	Octopus	notinalldifficult	SNV	3585473	44062	50941	0.98786	0.985991	0.986925	4
HG003+HG004	NovaSeq	60	FALSE	GT	Octopus	notinalldifficult	INDEL	201808	2628	3912	0.987145	0.980984	0.984055	4
HG003+HG004	NovaSeq	60	FALSE	GT	GATK4	notinalldifficult	SNV	3524039	105827	130874	0.970845	0.964192	0.967507	4
HG003+HG004	NovaSeq	60	FALSE	GT	GATK4	notinalldifficult	INDEL	198205	6250	7889	0.969431	0.961721	0.965561	4
HG003+HG004	NovaSeq	60	FALSE	GT	FreeBayes	notinalldifficult	SNV	3509136	120749	223865	0.966735	0.940031	0.953196	4
HG003+HG004	NovaSeq	60	FALSE	GT	FreeBayes	notinalldifficult	INDEL	191875	12583	46901	0.938457	0.803577	0.865795	4
HG003+HG004	NovaSeq	60	FALSE	GT	Octopus	notinalllowmapandsegdup	SNV	4030140	51908	60581	0.987284	0.985191	0.986236	4
HG003+HG004	NovaSeq	60	FALSE	GT	Octopus	notinalllowmapandsegdup	INDEL	566538	13850	22313	0.976137	0.962108	0.969071	4
HG003+HG004	NovaSeq	60	FALSE	GT	GATK4	notinalllowmapandsegdup	SNV	3960870	121617	158140	0.97021	0.961607	0.96589	4
HG003+HG004	NovaSeq	60	FALSE	GT	GATK4	notinalllowmapandsegdup	INDEL	553518	26931	29639	0.953603	0.949175	0.951384	4
HG003+HG004	NovaSeq	60	FALSE	GT	FreeBayes	notinalllowmapandsegdup	SNV	3943144	139443	286716	0.965844	0.932216	0.948732	4
HG003+HG004	NovaSeq	60	FALSE	GT	FreeBayes	notinalllowmapandsegdup	INDEL	529151	51378	88311	0.911498	0.856977	0.883397	4
HG003+HG004	NovaSeq	60	FALSE	GT	Octopus	AllTandemRepeatsandHomopolymers	SNV	199928	4147	5557	0.979679	0.972957	0.976306	4
HG003+HG004	NovaSeq	60	FALSE	GT	Octopus	AllTandemRepeatsandHomopolymers	INDEL	345743	11153	18223	0.96875	0.949932	0.959249	4
HG003+HG004	NovaSeq	60	FALSE	GT	GATK4	AllTandemRepeatsandHomopolymers	SNV	196639	7463	14342	0.963435	0.932022	0.947468	4
HG003+HG004	NovaSeq	60	FALSE	GT	GATK4	AllTandemRepeatsandHomopolymers	INDEL	336575	20357	20949	0.942967	0.941405	0.942185	4
HG003+HG004	NovaSeq	60	FALSE	GT	FreeBayes	AllTandemRepeatsandHomopolymers	SNV	194753	9427	38063	0.95383	0.83651	0.891326	4
HG003+HG004	NovaSeq	60	FALSE	GT	FreeBayes	AllTandemRepeatsandHomopolymers	INDEL	319141	37871	43328	0.893922	0.880464	0.887142	4
HG003+HG004	NovaSeq	60	FALSE	GT	Octopus	notinAllTandemRepeatsandHomopolymers	SNV	4120655	85565	94172	0.979658	0.977657	0.978656	4
HG003+HG004	NovaSeq	60	FALSE	GT	Octopus	notinAllTandemRepeatsandHomopolymers	INDEL	237946	4930	6490	0.979702	0.973449	0.976565	4
HG003+HG004	NovaSeq	60	FALSE	GT	GATK4	notinAllTandemRepeatsandHomopolymers	SNV	4044278	162376	215827	0.9614	0.949338	0.955331	4
HG003+HG004	NovaSeq	60	FALSE	GT	GATK4	notinAllTandemRepeatsandHomopolymers	INDEL	233398	9500	12957	0.960889	0.947405	0.954099	4
HG003+HG004	NovaSeq	60	FALSE	GT	FreeBayes	notinAllTandemRepeatsandHomopolymers	SNV	4029485	177199	316446	0.957877	0.927186	0.942281	4
HG003+HG004	NovaSeq	60	FALSE	GT	FreeBayes	notinAllTandemRepeatsandHomopolymers	INDEL	225948	16955	66652	0.930198	0.772208	0.843872	4
HG003+HG004	NovaSeq	70	FALSE	GT	Octopus	genome	SNV	4338420	71904	84268	0.983696	0.980946	0.98232	4
HG003+HG004	NovaSeq	70	FALSE	GT	Octopus	genome	INDEL	586850	12297	19457	0.979476	0.967909	0.973658	4
HG003+HG004	NovaSeq	70	FALSE	GT	GATK4	genome	SNV	4275780	134972	196461	0.969399	0.956071	0.962689	4
HG003+HG004	NovaSeq	70	FALSE	GT	GATK4	genome	INDEL	575547	23660	27731	0.960514	0.954033	0.957263	4
HG003+HG004	NovaSeq	70	FALSE	GT	FreeBayes	genome	SNV	4259231	151633	302844	0.965623	0.933617	0.94935	4
HG003+HG004	NovaSeq	70	FALSE	GT	FreeBayes	genome	INDEL	552048	47245	89445	0.921165	0.860567	0.889836	4
HG003+HG004	NovaSeq	70	FALSE	GT	Octopus	alldifficult	SNV	738937	41871	47065	0.946375	0.940121	0.943238	4
HG003+HG004	NovaSeq	70	FALSE	GT	Octopus	alldifficult	INDEL	384633	10478	16563	0.973481	0.958716	0.966042	4
HG003+HG004	NovaSeq	70	FALSE	GT	GATK4	alldifficult	SNV	722901	57987	94932	0.925742	0.883923	0.904349	4
HG003+HG004	NovaSeq	70	FALSE	GT	GATK4	alldifficult	INDEL	376079	19072	21569	0.951735	0.945759	0.948737	4
HG003+HG004	NovaSeq	70	FALSE	GT	FreeBayes	alldifficult	SNV	721255	59724	120866	0.923527	0.856474	0.888738	4
HG003+HG004	NovaSeq	70	FALSE	GT	FreeBayes	alldifficult	INDEL	358907	36328	55480	0.908085	0.866115	0.886604	4
HG003+HG004	NovaSeq	70	FALSE	GT	Octopus	alllowmapandsegdup	SNV	292328	35923	39088	0.890562	0.882058	0.88629	4
HG003+HG004	NovaSeq	70	FALSE	GT	Octopus	alllowmapandsegdup	INDEL	16456	2089	2386	0.887355	0.873368	0.880306	4
HG003+HG004	NovaSeq	70	FALSE	GT	GATK4	alllowmapandsegdup	SNV	282672	45597	71294	0.861099	0.798585	0.828665	4
HG003+HG004	NovaSeq	70	FALSE	GT	GATK4	alllowmapandsegdup	INDEL	15865	2678	4155	0.855579	0.792458	0.822809	4
HG003+HG004	NovaSeq	70	FALSE	GT	FreeBayes	alllowmapandsegdup	SNV	283625	44652	64273	0.863981	0.815253	0.83891	4
HG003+HG004	NovaSeq	70	FALSE	GT	FreeBayes	alllowmapandsegdup	INDEL	15305	3242	12055	0.825201	0.559393	0.666783	4
HG003+HG004	NovaSeq	70	FALSE	GT	Octopus	notinalldifficult	SNV	3599483	30033	37203	0.991725	0.98977	0.990747	4
HG003+HG004	NovaSeq	70	FALSE	GT	Octopus	notinalldifficult	INDEL	202609	1827	2967	0.991063	0.985567	0.988308	4
HG003+HG004	NovaSeq	70	FALSE	GT	GATK4	notinalldifficult	SNV	3552879	76985	101529	0.978791	0.972217	0.975493	4
HG003+HG004	NovaSeq	70	FALSE	GT	GATK4	notinalldifficult	INDEL	199857	4598	6168	0.977511	0.970062	0.973772	4
HG003+HG004	NovaSeq	70	FALSE	GT	FreeBayes	notinalldifficult	SNV	3537976	91909	181978	0.97468	0.951081	0.962736	4
HG003+HG004	NovaSeq	70	FALSE	GT	FreeBayes	notinalldifficult	INDEL	193540	10918	41114	0.9466	0.824789	0.881506	4
HG003+HG004	NovaSeq	70	FALSE	GT	Octopus	notinalllowmapandsegdup	SNV	4046092	35981	45180	0.991186	0.988957	0.99007	4
HG003+HG004	NovaSeq	70	FALSE	GT	Octopus	notinalllowmapandsegdup	INDEL	570175	10210	17121	0.982408	0.970848	0.976594	4
HG003+HG004	NovaSeq	70	FALSE	GT	GATK4	notinalllowmapandsegdup	SNV	3993108	89375	125167	0.978108	0.969607	0.973839	4
HG003+HG004	NovaSeq	70	FALSE	GT	GATK4	notinalllowmapandsegdup	INDEL	559475	20972	23564	0.963869	0.959584	0.961722	4
HG003+HG004	NovaSeq	70	FALSE	GT	FreeBayes	notinalllowmapandsegdup	SNV	3975606	106981	238571	0.973796	0.943388	0.958351	4
HG003+HG004	NovaSeq	70	FALSE	GT	FreeBayes	notinalllowmapandsegdup	INDEL	536543	43986	77669	0.924231	0.873547	0.898175	4
HG003+HG004	NovaSeq	70	FALSE	GT	Octopus	AllTandemRepeatsandHomopolymers	SNV	200890	3181	4805	0.984412	0.97664	0.980511	4
HG003+HG004	NovaSeq	70	FALSE	GT	Octopus	AllTandemRepeatsandHomopolymers	INDEL	348513	8377	14043	0.976528	0.961267	0.968837	4
HG003+HG004	NovaSeq	70	FALSE	GT	GATK4	AllTandemRepeatsandHomopolymers	SNV	198269	5831	12463	0.971431	0.940859	0.9559	4
HG003+HG004	NovaSeq	70	FALSE	GT	GATK4	AllTandemRepeatsandHomopolymers	INDEL	340766	16164	16734	0.954714	0.953192	0.953952	4
HG003+HG004	NovaSeq	70	FALSE	GT	FreeBayes	AllTandemRepeatsandHomopolymers	SNV	196502	7678	34933	0.962396	0.849059	0.902182	4
HG003+HG004	NovaSeq	70	FALSE	GT	FreeBayes	AllTandemRepeatsandHomopolymers	INDEL	324700	32312	37469	0.909493	0.896543	0.902972	4
HG003+HG004	NovaSeq	70	FALSE	GT	Octopus	notinAllTandemRepeatsandHomopolymers	SNV	4137530	68723	79463	0.983662	0.981156	0.982407	4
HG003+HG004	NovaSeq	70	FALSE	GT	Octopus	notinAllTandemRepeatsandHomopolymers	INDEL	238948	3931	5469	0.983815	0.977624	0.98071	4
HG003+HG004	NovaSeq	70	FALSE	GT	GATK4	notinAllTandemRepeatsandHomopolymers	SNV	4077511	129141	183998	0.969301	0.956823	0.963022	4
HG003+HG004	NovaSeq	70	FALSE	GT	GATK4	notinAllTandemRepeatsandHomopolymers	INDEL	235377	7521	11026	0.969036	0.955252	0.962095	4
HG003+HG004	NovaSeq	70	FALSE	GT	FreeBayes	notinAllTandemRepeatsandHomopolymers	SNV	4062729	143955	267911	0.965779	0.938136	0.951757	4
HG003+HG004	NovaSeq	70	FALSE	GT	FreeBayes	notinAllTandemRepeatsandHomopolymers	INDEL	227944	14959	59640	0.938416	0.792617	0.859376	4
HG002	NovaSeq	10	FALSE	GT	Octopus	genome	SNV	3202799	162328	43594	0.951762	0.986572	0.968854	2
HG002	NovaSeq	10	FALSE	GT	Octopus	genome	INDEL	483101	42296	25462	0.919497	0.949933	0.934467	2
HG002	NovaSeq	10	FALSE	GT	GATK4	genome	SNV	3214889	150238	100725	0.955354	0.969621	0.962435	2
HG002	NovaSeq	10	FALSE	GT	GATK4	genome	INDEL	472700	52697	27944	0.899701	0.944184	0.921406	2
HG002	NovaSeq	10	FALSE	GT	FreeBayes	genome	SNV	3235579	129548	435029	0.961503	0.881483	0.919756	2
HG002	NovaSeq	10	FALSE	GT	FreeBayes	genome	INDEL	453313	72084	80603	0.862801	0.849034	0.855862	2
HG002	NovaSeq	10	FALSE	GT	Octopus	alldifficult	SNV	567439	60524	17324	0.903619	0.970374	0.935807	2
HG002	NovaSeq	10	FALSE	GT	Octopus	alldifficult	INDEL	332077	36572	22003	0.900795	0.937859	0.918953	2
HG002	NovaSeq	10	FALSE	GT	GATK4	alldifficult	SNV	567691	60272	39667	0.90402	0.934689	0.919099	2
HG002	NovaSeq	10	FALSE	GT	GATK4	alldifficult	INDEL	321961	46688	21793	0.873354	0.936603	0.903873	2
HG002	NovaSeq	10	FALSE	GT	FreeBayes	alldifficult	SNV	575579	52384	128565	0.916581	0.817417	0.864163	2
HG002	NovaSeq	10	FALSE	GT	FreeBayes	alldifficult	INDEL	306099	62550	51149	0.830326	0.856825	0.843368	2
HG002	NovaSeq	10	FALSE	GT	Octopus	alllowmapandsegdup	SNV	217003	42192	12220	0.837219	0.946689	0.888595	2
HG002	NovaSeq	10	FALSE	GT	Octopus	alllowmapandsegdup	INDEL	14511	3003	1085	0.828537	0.930431	0.876533	2
HG002	NovaSeq	10	FALSE	GT	GATK4	alllowmapandsegdup	SNV	215468	43727	27315	0.831297	0.887492	0.858476	2
HG002	NovaSeq	10	FALSE	GT	GATK4	alllowmapandsegdup	INDEL	14220	3294	1992	0.811922	0.877128	0.843266	2
HG002	NovaSeq	10	FALSE	GT	FreeBayes	alllowmapandsegdup	SNV	221591	37604	49211	0.85492	0.818277	0.836197	2
HG002	NovaSeq	10	FALSE	GT	FreeBayes	alllowmapandsegdup	INDEL	14097	3417	8230	0.804899	0.631388	0.707663	2
HG002	NovaSeq	10	FALSE	GT	Octopus	notinalldifficult	SNV	2635360	101804	26270	0.962807	0.99013	0.976277	2
HG002	NovaSeq	10	FALSE	GT	Octopus	notinalldifficult	INDEL	151196	5735	3462	0.963455	0.977615	0.970484	2
HG002	NovaSeq	10	FALSE	GT	GATK4	notinalldifficult	SNV	2647198	89966	61058	0.967132	0.977455	0.972266	2
HG002	NovaSeq	10	FALSE	GT	GATK4	notinalldifficult	INDEL	150908	6023	6166	0.96162	0.960745	0.961182	2
HG002	NovaSeq	10	FALSE	GT	FreeBayes	notinalldifficult	SNV	2660000	77164	306464	0.971809	0.89669	0.93274	2
HG002	NovaSeq	10	FALSE	GT	FreeBayes	notinalldifficult	INDEL	147383	9548	39554	0.939158	0.78841	0.857207	2
HG002	NovaSeq	10	FALSE	GT	Octopus	notinalllowmapandsegdup	SNV	2985796	120136	31374	0.96132	0.989602	0.975256	2
HG002	NovaSeq	10	FALSE	GT	Octopus	notinalllowmapandsegdup	INDEL	468400	39281	24373	0.922627	0.950539	0.936375	2
HG002	NovaSeq	10	FALSE	GT	GATK4	notinalllowmapandsegdup	SNV	2999421	106511	73410	0.965707	0.97611	0.970881	2
HG002	NovaSeq	10	FALSE	GT	GATK4	notinalllowmapandsegdup	INDEL	458282	49399	25951	0.902697	0.946408	0.924036	2
HG002	NovaSeq	10	FALSE	GT	FreeBayes	notinalllowmapandsegdup	SNV	3013988	91944	385818	0.970397	0.886518	0.926563	2
HG002	NovaSeq	10	FALSE	GT	FreeBayes	notinalllowmapandsegdup	INDEL	439012	68669	72686	0.86474	0.857951	0.861332	2
HG002	NovaSeq	10	FALSE	GT	Octopus	AllTandemRepeatsandHomopolymers	SNV	172486	10420	3482	0.943031	0.980212	0.961262	2
HG002	NovaSeq	10	FALSE	GT	Octopus	AllTandemRepeatsandHomopolymers	INDEL	305335	33541	20941	0.901023	0.935818	0.918091	2
HG002	NovaSeq	10	FALSE	GT	GATK4	AllTandemRepeatsandHomopolymers	SNV	172836	10070	8449	0.944944	0.953394	0.94915	2
HG002	NovaSeq	10	FALSE	GT	GATK4	AllTandemRepeatsandHomopolymers	INDEL	295332	43544	19680	0.871505	0.937526	0.903311	2
HG002	NovaSeq	10	FALSE	GT	FreeBayes	AllTandemRepeatsandHomopolymers	SNV	173552	9354	54488	0.948859	0.761059	0.844646	2
HG002	NovaSeq	10	FALSE	GT	FreeBayes	AllTandemRepeatsandHomopolymers	INDEL	279860	59016	40477	0.825848	0.873642	0.849073	2
HG002	NovaSeq	10	FALSE	GT	Octopus	notinAllTandemRepeatsandHomopolymers	SNV	3030313	151908	40112	0.952264	0.986936	0.96929	2
HG002	NovaSeq	10	FALSE	GT	Octopus	notinAllTandemRepeatsandHomopolymers	INDEL	178148	8790	4526	0.952979	0.975224	0.963973	2
HG002	NovaSeq	10	FALSE	GT	GATK4	notinAllTandemRepeatsandHomopolymers	SNV	3042053	140168	92276	0.955953	0.97056	0.963201	2
HG002	NovaSeq	10	FALSE	GT	GATK4	notinAllTandemRepeatsandHomopolymers	INDEL	177745	9193	8295	0.950823	0.955413	0.953113	2
HG002	NovaSeq	10	FALSE	GT	FreeBayes	notinAllTandemRepeatsandHomopolymers	SNV	3062027	120194	380541	0.96223	0.88946	0.924415	2
HG002	NovaSeq	10	FALSE	GT	FreeBayes	notinAllTandemRepeatsandHomopolymers	INDEL	173823	13115	50964	0.929843	0.773279	0.844365	2
HG002	NovaSeq	20	FALSE	GT	Octopus	genome	SNV	3328318	36809	18243	0.989062	0.994549	0.991798	2
HG002	NovaSeq	20	FALSE	GT	Octopus	genome	INDEL	517719	7678	8054	0.985386	0.984682	0.985034	2
HG002	NovaSeq	20	FALSE	GT	GATK4	genome	SNV	3329430	35697	50755	0.989392	0.984985	0.987183	2
HG002	NovaSeq	20	FALSE	GT	GATK4	genome	INDEL	514626	10771	10301	0.979499	0.980376	0.979938	2
HG002	NovaSeq	20	FALSE	GT	FreeBayes	genome	SNV	3334382	30745	217089	0.990864	0.938873	0.964168	2
HG002	NovaSeq	20	FALSE	GT	FreeBayes	genome	INDEL	498371	27026	57858	0.948561	0.895982	0.921522	2
HG002	NovaSeq	20	FALSE	GT	Octopus	alldifficult	SNV	599159	28804	14177	0.954131	0.976885	0.965374	2
HG002	NovaSeq	20	FALSE	GT	Octopus	alldifficult	INDEL	361513	7136	6986	0.980643	0.981042	0.980842	2
HG002	NovaSeq	20	FALSE	GT	GATK4	alldifficult	SNV	598241	29722	35153	0.952669	0.944501	0.948567	2
HG002	NovaSeq	20	FALSE	GT	GATK4	alldifficult	INDEL	358491	10158	7892	0.972445	0.97846	0.975443	2
HG002	NovaSeq	20	FALSE	GT	FreeBayes	alldifficult	SNV	601797	26166	78414	0.958332	0.884721	0.920057	2
HG002	NovaSeq	20	FALSE	GT	FreeBayes	alldifficult	INDEL	344807	23842	35871	0.935326	0.905771	0.920311	2
HG002	NovaSeq	20	FALSE	GT	Octopus	alllowmapandsegdup	SNV	233142	26053	12874	0.899485	0.94767	0.922949	2
HG002	NovaSeq	20	FALSE	GT	Octopus	alllowmapandsegdup	INDEL	15708	1806	954	0.896882	0.942744	0.919242	2
HG002	NovaSeq	20	FALSE	GT	GATK4	alllowmapandsegdup	SNV	231874	27321	29125	0.894593	0.88841	0.89149	2
HG002	NovaSeq	20	FALSE	GT	GATK4	alllowmapandsegdup	INDEL	15496	2018	2049	0.884778	0.883215	0.883996	2
HG002	NovaSeq	20	FALSE	GT	FreeBayes	alllowmapandsegdup	SNV	235642	23553	37759	0.90913	0.861892	0.884881	2
HG002	NovaSeq	20	FALSE	GT	FreeBayes	alllowmapandsegdup	INDEL	15272	2242	7691	0.871988	0.66507	0.754601	2
HG002	NovaSeq	20	FALSE	GT	Octopus	notinalldifficult	SNV	2729159	8005	4066	0.997075	0.998512	0.997793	2
HG002	NovaSeq	20	FALSE	GT	Octopus	notinalldifficult	INDEL	156386	545	1078	0.996527	0.993154	0.994838	2
HG002	NovaSeq	20	FALSE	GT	GATK4	notinalldifficult	SNV	2731189	5975	15602	0.997817	0.99432	0.996065	2
HG002	NovaSeq	20	FALSE	GT	GATK4	notinalldifficult	INDEL	156319	612	2412	0.9961	0.984804	0.99042	2
HG002	NovaSeq	20	FALSE	GT	FreeBayes	notinalldifficult	SNV	2732585	4579	138675	0.998327	0.951702	0.974457	2
HG002	NovaSeq	20	FALSE	GT	FreeBayes	notinalldifficult	INDEL	153775	3156	27975	0.979889	0.84608	0.908082	2
HG002	NovaSeq	20	FALSE	GT	Octopus	notinalllowmapandsegdup	SNV	3095176	10756	5369	0.996537	0.998268	0.997402	2
HG002	NovaSeq	20	FALSE	GT	Octopus	notinalllowmapandsegdup	INDEL	501808	5873	7105	0.988432	0.986039	0.987234	2
HG002	NovaSeq	20	FALSE	GT	GATK4	notinalllowmapandsegdup	SNV	3097556	8376	21630	0.997303	0.993065	0.99518	2
HG002	NovaSeq	20	FALSE	GT	GATK4	notinalllowmapandsegdup	INDEL	498926	8755	8263	0.982755	0.983708	0.983231	2
HG002	NovaSeq	20	FALSE	GT	FreeBayes	notinalllowmapandsegdup	SNV	3098740	7192	179330	0.997684	0.945294	0.970783	2
HG002	NovaSeq	20	FALSE	GT	FreeBayes	notinalllowmapandsegdup	INDEL	482891	24790	50397	0.95117	0.905498	0.927772	2
HG002	NovaSeq	20	FALSE	GT	Octopus	AllTandemRepeatsandHomopolymers	SNV	181387	1519	1304	0.991695	0.992862	0.992278	2
HG002	NovaSeq	20	FALSE	GT	Octopus	AllTandemRepeatsandHomopolymers	INDEL	333294	5582	6211	0.983528	0.981706	0.982616	2
HG002	NovaSeq	20	FALSE	GT	GATK4	AllTandemRepeatsandHomopolymers	SNV	181202	1704	5274	0.990684	0.971718	0.981109	2
HG002	NovaSeq	20	FALSE	GT	GATK4	AllTandemRepeatsandHomopolymers	INDEL	330377	8499	5953	0.97492	0.9823	0.978596	2
HG002	NovaSeq	20	FALSE	GT	FreeBayes	AllTandemRepeatsandHomopolymers	SNV	180757	2149	30648	0.988251	0.855027	0.916825	2
HG002	NovaSeq	20	FALSE	GT	FreeBayes	AllTandemRepeatsandHomopolymers	INDEL	317039	21837	26370	0.935561	0.923211	0.929345	2
HG002	NovaSeq	20	FALSE	GT	Octopus	notinAllTandemRepeatsandHomopolymers	SNV	3146931	35290	16939	0.98891	0.994646	0.99177	2
HG002	NovaSeq	20	FALSE	GT	Octopus	notinAllTandemRepeatsandHomopolymers	INDEL	184832	2106	1855	0.988734	0.990064	0.989398	2
HG002	NovaSeq	20	FALSE	GT	GATK4	notinAllTandemRepeatsandHomopolymers	SNV	3148228	33993	45481	0.989318	0.985759	0.987535	2
HG002	NovaSeq	20	FALSE	GT	GATK4	notinAllTandemRepeatsandHomopolymers	INDEL	184661	2277	4353	0.987819	0.97697	0.982365	2
HG002	NovaSeq	20	FALSE	GT	FreeBayes	notinAllTandemRepeatsandHomopolymers	SNV	3153625	28596	186441	0.991014	0.94418	0.96703	2
HG002	NovaSeq	20	FALSE	GT	FreeBayes	notinAllTandemRepeatsandHomopolymers	INDEL	181765	5173	37924	0.972328	0.827374	0.894013	2
HG002	NovaSeq	30	FALSE	GT	Octopus	genome	SNV	3340440	24687	17185	0.992664	0.994882	0.993772	2
HG002	NovaSeq	30	FALSE	GT	Octopus	genome	INDEL	521974	3423	4094	0.993485	0.992218	0.992851	2
HG002	NovaSeq	30	FALSE	GT	GATK4	genome	SNV	3338596	26531	45196	0.992116	0.986643	0.989372	2
HG002	NovaSeq	30	FALSE	GT	GATK4	genome	INDEL	520535	4862	5611	0.990746	0.989336	0.99004	2
HG002	NovaSeq	30	FALSE	GT	FreeBayes	genome	SNV	3341449	23678	87217	0.992964	0.974562	0.983677	2
HG002	NovaSeq	30	FALSE	GT	FreeBayes	genome	INDEL	507471	17926	37965	0.965881	0.930395	0.947806	2
HG002	NovaSeq	30	FALSE	GT	Octopus	alldifficult	SNV	604765	23198	15130	0.963058	0.975593	0.969285	2
HG002	NovaSeq	30	FALSE	GT	Octopus	alldifficult	INDEL	365386	3263	3673	0.991149	0.990048	0.990598	2
HG002	NovaSeq	30	FALSE	GT	GATK4	alldifficult	SNV	603005	24958	35058	0.960256	0.945056	0.952595	2
HG002	NovaSeq	30	FALSE	GT	GATK4	alldifficult	INDEL	364007	4642	4617	0.987408	0.987475	0.987442	2
HG002	NovaSeq	30	FALSE	GT	FreeBayes	alldifficult	SNV	605359	22604	49016	0.964004	0.925095	0.944149	2
HG002	NovaSeq	30	FALSE	GT	FreeBayes	alldifficult	INDEL	353374	15275	24949	0.958565	0.934054	0.946151	2
HG002	NovaSeq	30	FALSE	GT	Octopus	alllowmapandsegdup	SNV	237260	21935	14206	0.915373	0.943507	0.929227	2
HG002	NovaSeq	30	FALSE	GT	Octopus	alllowmapandsegdup	INDEL	15961	1553	1056	0.911328	0.937944	0.924445	2
HG002	NovaSeq	30	FALSE	GT	GATK4	alllowmapandsegdup	SNV	235583	23612	30362	0.908903	0.885834	0.89722	2
HG002	NovaSeq	30	FALSE	GT	GATK4	alllowmapandsegdup	INDEL	15795	1719	2104	0.90185	0.882452	0.892045	2
HG002	NovaSeq	30	FALSE	GT	FreeBayes	alllowmapandsegdup	SNV	238216	20979	29204	0.919061	0.890794	0.904706	2
HG002	NovaSeq	30	FALSE	GT	FreeBayes	alllowmapandsegdup	INDEL	15537	1977	6579	0.887119	0.702523	0.784103	2
HG002	NovaSeq	30	FALSE	GT	Octopus	notinalldifficult	SNV	2735675	1489	2055	0.999456	0.999249	0.999353	2
HG002	NovaSeq	30	FALSE	GT	Octopus	notinalldifficult	INDEL	156773	158	427	0.998993	0.997284	0.998138	2
HG002	NovaSeq	30	FALSE	GT	GATK4	notinalldifficult	SNV	2735591	1573	10138	0.999425	0.996308	0.997864	2
HG002	NovaSeq	30	FALSE	GT	GATK4	notinalldifficult	INDEL	156713	218	993	0.998611	0.993703	0.996151	2
HG002	NovaSeq	30	FALSE	GT	FreeBayes	notinalldifficult	SNV	2736090	1074	38201	0.999608	0.98623	0.992874	2
HG002	NovaSeq	30	FALSE	GT	FreeBayes	notinalldifficult	INDEL	154304	2627	16423	0.98326	0.903805	0.94186	2
HG002	NovaSeq	30	FALSE	GT	Octopus	notinalllowmapandsegdup	SNV	3103180	2752	2979	0.999114	0.999041	0.999077	2
HG002	NovaSeq	30	FALSE	GT	Octopus	notinalllowmapandsegdup	INDEL	505808	1873	3043	0.996311	0.99402	0.995164	2
HG002	NovaSeq	30	FALSE	GT	GATK4	notinalllowmapandsegdup	SNV	3103013	2919	14834	0.99906	0.995242	0.997148	2
HG002	NovaSeq	30	FALSE	GT	GATK4	notinalllowmapandsegdup	INDEL	504538	3143	3515	0.993809	0.993081	0.993445	2
HG002	NovaSeq	30	FALSE	GT	FreeBayes	notinalllowmapandsegdup	SNV	3103233	2699	58013	0.999131	0.981649	0.990313	2
HG002	NovaSeq	30	FALSE	GT	FreeBayes	notinalllowmapandsegdup	INDEL	491725	15956	31533	0.968571	0.939737	0.953936	2
HG002	NovaSeq	30	FALSE	GT	Octopus	AllTandemRepeatsandHomopolymers	SNV	182242	664	1103	0.99637	0.993984	0.995175	2
HG002	NovaSeq	30	FALSE	GT	Octopus	AllTandemRepeatsandHomopolymers	INDEL	336912	1964	2825	0.994204	0.991685	0.992943	2
HG002	NovaSeq	30	FALSE	GT	GATK4	AllTandemRepeatsandHomopolymers	SNV	181944	962	4294	0.99474	0.976943	0.985762	2
HG002	NovaSeq	30	FALSE	GT	GATK4	AllTandemRepeatsandHomopolymers	INDEL	335631	3245	2762	0.990424	0.991838	0.991131	2
HG002	NovaSeq	30	FALSE	GT	FreeBayes	AllTandemRepeatsandHomopolymers	SNV	181506	1400	17010	0.992346	0.914314	0.951733	2
HG002	NovaSeq	30	FALSE	GT	FreeBayes	AllTandemRepeatsandHomopolymers	INDEL	325398	13478	17296	0.960227	0.949529	0.954848	2
HG002	NovaSeq	30	FALSE	GT	Octopus	notinAllTandemRepeatsandHomopolymers	SNV	3158198	24023	16082	0.992451	0.994934	0.993691	2
HG002	NovaSeq	30	FALSE	GT	Octopus	notinAllTandemRepeatsandHomopolymers	INDEL	185476	1462	1273	0.992179	0.993183	0.992681	2
HG002	NovaSeq	30	FALSE	GT	GATK4	notinAllTandemRepeatsandHomopolymers	SNV	3156652	25569	40902	0.991965	0.987208	0.989581	2
HG002	NovaSeq	30	FALSE	GT	GATK4	notinAllTandemRepeatsandHomopolymers	INDEL	185319	1619	2853	0.991339	0.984838	0.988078	2
HG002	NovaSeq	30	FALSE	GT	FreeBayes	notinAllTandemRepeatsandHomopolymers	SNV	3159943	22278	70207	0.992999	0.978265	0.985577	2
HG002	NovaSeq	30	FALSE	GT	FreeBayes	notinAllTandemRepeatsandHomopolymers	INDEL	182507	4431	24340	0.976297	0.882328	0.926937	2
HG002+HG003+HG004	NovaSeq	10	TRUE	AL	Octopus	genome	SNV	2112737	2262521	1315662	0.482883	0.616246	0.541474	6
HG002+HG003+HG004	NovaSeq	10	TRUE	AL	Octopus	genome	INDEL	259894	311422	220773	0.454904	0.540694	0.494103	6
HG002+HG003+HG004	NovaSeq	10	TRUE	AL	GATK4	genome	SNV	2053270	2323426	1520604	0.469137	0.574522	0.516509	6
HG002+HG003+HG004	NovaSeq	10	TRUE	AL	GATK4	genome	INDEL	226349	346013	201003	0.395465	0.529655	0.452828	6
HG002+HG003+HG004	NovaSeq	10	TRUE	AL	FreeBayes	genome	SNV	1860614	2517203	1383417	0.42501	0.57355	0.488232	6
HG002+HG003+HG004	NovaSeq	10	TRUE	AL	FreeBayes	genome	INDEL	186373	386865	199604	0.325123	0.48286	0.388595	6
HG002+HG003+HG004	NovaSeq	10	TRUE	AL	Octopus	alldifficult	SNV	340260	422043	218380	0.446358	0.609086	0.515177	6
HG002+HG003+HG004	NovaSeq	10	TRUE	AL	Octopus	alldifficult	INDEL	153685	215630	156500	0.416135	0.495462	0.452347	6
HG002+HG003+HG004	NovaSeq	10	TRUE	AL	GATK4	alldifficult	SNV	322390	440087	255157	0.422819	0.558206	0.48117	6
HG002+HG003+HG004	NovaSeq	10	TRUE	AL	GATK4	alldifficult	INDEL	130004	240281	132492	0.351092	0.495261	0.410897	6
HG002+HG003+HG004	NovaSeq	10	TRUE	AL	FreeBayes	alldifficult	SNV	298541	464603	225562	0.391199	0.569623	0.463844	6
HG002+HG003+HG004	NovaSeq	10	TRUE	AL	FreeBayes	alldifficult	INDEL	105859	265285	116212	0.285224	0.47669	0.356899	6
HG002+HG003+HG004	NovaSeq	10	TRUE	AL	Octopus	alllowmapandsegdup	SNV	129781	188553	88541	0.407688	0.594448	0.483666	6
HG002+HG003+HG004	NovaSeq	10	TRUE	AL	Octopus	alllowmapandsegdup	INDEL	7327	10372	5435	0.413978	0.574126	0.481074	6
HG002+HG003+HG004	NovaSeq	10	TRUE	AL	GATK4	alllowmapandsegdup	SNV	114951	203404	100465	0.361078	0.533623	0.430713	6
HG002+HG003+HG004	NovaSeq	10	TRUE	AL	GATK4	alllowmapandsegdup	INDEL	6154	11558	5812	0.347448	0.51429	0.414718	6
HG002+HG003+HG004	NovaSeq	10	TRUE	AL	FreeBayes	alllowmapandsegdup	SNV	112146	206299	89529	0.352168	0.556073	0.431231	6
HG002+HG003+HG004	NovaSeq	10	TRUE	AL	FreeBayes	alllowmapandsegdup	INDEL	5333	12391	9675	0.300891	0.355344	0.325858	6
HG002+HG003+HG004	NovaSeq	10	TRUE	AL	Octopus	notinalldifficult	SNV	1772477	1840478	1097282	0.490589	0.61764	0.546832	6
HG002+HG003+HG004	NovaSeq	10	TRUE	AL	Octopus	notinalldifficult	INDEL	106296	96096	64363	0.525199	0.622856	0.569874	6
HG002+HG003+HG004	NovaSeq	10	TRUE	AL	GATK4	notinalldifficult	SNV	1730880	1883339	1265447	0.478908	0.577667	0.523672	6
HG002+HG003+HG004	NovaSeq	10	TRUE	AL	GATK4	notinalldifficult	INDEL	96450	106018	68699	0.476372	0.584018	0.524731	6
HG002+HG003+HG004	NovaSeq	10	TRUE	AL	FreeBayes	notinalldifficult	SNV	1562073	2052600	1157855	0.432148	0.574307	0.493187	6
HG002+HG003+HG004	NovaSeq	10	TRUE	AL	FreeBayes	notinalldifficult	INDEL	80496	121990	109055	0.397539	0.424667	0.410655	6
HG002+HG003+HG004	NovaSeq	10	TRUE	AL	Octopus	notinalllowmapandsegdup	SNV	1982956	2073968	1227121	0.488783	0.617728	0.545743	6
HG002+HG003+HG004	NovaSeq	10	TRUE	AL	Octopus	notinalllowmapandsegdup	INDEL	252419	300987	215305	0.456119	0.539675	0.494392	6
HG002+HG003+HG004	NovaSeq	10	TRUE	AL	GATK4	notinalllowmapandsegdup	SNV	1938319	2120022	1420139	0.477614	0.577146	0.522683	6
HG002+HG003+HG004	NovaSeq	10	TRUE	AL	GATK4	notinalllowmapandsegdup	INDEL	220065	334374	195145	0.396915	0.530009	0.453907	6
HG002+HG003+HG004	NovaSeq	10	TRUE	AL	FreeBayes	notinalllowmapandsegdup	SNV	1748468	2310904	1293888	0.430724	0.574709	0.492406	6
HG002+HG003+HG004	NovaSeq	10	TRUE	AL	FreeBayes	notinalllowmapandsegdup	INDEL	180923	374380	190438	0.32581	0.487189	0.390482	6
HG002+HG003+HG004	NovaSeq	10	TRUE	AL	Octopus	AllTandemRepeatsandHomopolymers	SNV	88814	107656	55668	0.452049	0.614706	0.520977	6
HG002+HG003+HG004	NovaSeq	10	TRUE	AL	Octopus	AllTandemRepeatsandHomopolymers	INDEL	135788	196162	145077	0.409062	0.483464	0.443161	6
HG002+HG003+HG004	NovaSeq	10	TRUE	AL	GATK4	AllTandemRepeatsandHomopolymers	SNV	88837	107731	67914	0.45194	0.56674	0.502871	6
HG002+HG003+HG004	NovaSeq	10	TRUE	AL	GATK4	AllTandemRepeatsandHomopolymers	INDEL	114185	218726	120018	0.34299	0.487547	0.402688	6
HG002+HG003+HG004	NovaSeq	10	TRUE	AL	FreeBayes	AllTandemRepeatsandHomopolymers	SNV	78968	118108	57644	0.400698	0.578046	0.473304	6
HG002+HG003+HG004	NovaSeq	10	TRUE	AL	FreeBayes	AllTandemRepeatsandHomopolymers	INDEL	92550	241202	98749	0.277302	0.483798	0.352537	6
HG002+HG003+HG004	NovaSeq	10	TRUE	AL	Octopus	notinAllTandemRepeatsandHomopolymers	SNV	2023923	2154865	1259994	0.484333	0.616314	0.54241	6
HG002+HG003+HG004	NovaSeq	10	TRUE	AL	Octopus	notinAllTandemRepeatsandHomopolymers	INDEL	124318	115650	75830	0.518061	0.62113	0.564933	6
HG002+HG003+HG004	NovaSeq	10	TRUE	AL	GATK4	notinAllTandemRepeatsandHomopolymers	SNV	1964433	2215695	1452690	0.469946	0.574879	0.517143	6
HG002+HG003+HG004	NovaSeq	10	TRUE	AL	GATK4	notinAllTandemRepeatsandHomopolymers	INDEL	112371	127683	81235	0.468107	0.580411	0.518245	6
HG002+HG003+HG004	NovaSeq	10	TRUE	AL	FreeBayes	notinAllTandemRepeatsandHomopolymers	SNV	1781646	2399095	1325773	0.426156	0.573352	0.488915	6
HG002+HG003+HG004	NovaSeq	10	TRUE	AL	FreeBayes	notinAllTandemRepeatsandHomopolymers	INDEL	93904	146185	128746	0.391122	0.421756	0.405862	6
HG002+HG003+HG004	NovaSeq	20	TRUE	AL	Octopus	genome	SNV	3002883	1372671	992921	0.686286	0.751509	0.717418	6
HG002+HG003+HG004	NovaSeq	20	TRUE	AL	Octopus	genome	INDEL	374114	195540	180557	0.656739	0.674479	0.665491	6
HG002+HG003+HG004	NovaSeq	20	TRUE	AL	GATK4	genome	SNV	2790808	1585448	1249788	0.637716	0.690692	0.663148	6
HG002+HG003+HG004	NovaSeq	20	TRUE	AL	GATK4	genome	INDEL	326938	244728	182880	0.571904	0.641284	0.60461	6
HG002+HG003+HG004	NovaSeq	20	TRUE	AL	FreeBayes	genome	SNV	2707753	1669946	1274598	0.618533	0.679938	0.647784	6
HG002+HG003+HG004	NovaSeq	20	TRUE	AL	FreeBayes	genome	INDEL	282874	290100	212456	0.493694	0.571082	0.529576	6
HG002+HG003+HG004	NovaSeq	20	TRUE	AL	Octopus	alldifficult	SNV	490047	271818	176630	0.64322	0.735059	0.68608	6
HG002+HG003+HG004	NovaSeq	20	TRUE	AL	Octopus	alldifficult	INDEL	227197	140406	131804	0.61805	0.632859	0.625367	6
HG002+HG003+HG004	NovaSeq	20	TRUE	AL	GATK4	alldifficult	SNV	442335	319820	222338	0.580374	0.665493	0.620026	6
HG002+HG003+HG004	NovaSeq	20	TRUE	AL	GATK4	alldifficult	INDEL	195008	174588	125860	0.527625	0.607751	0.564861	6
HG002+HG003+HG004	NovaSeq	20	TRUE	AL	FreeBayes	alldifficult	SNV	438075	324966	216051	0.574117	0.66971	0.61824	6
HG002+HG003+HG004	NovaSeq	20	TRUE	AL	FreeBayes	alldifficult	INDEL	166276	204610	128555	0.448321	0.563971	0.49954	6
HG002+HG003+HG004	NovaSeq	20	TRUE	AL	Octopus	alllowmapandsegdup	SNV	188089	130236	78757	0.590871	0.70486	0.642851	6
HG002+HG003+HG004	NovaSeq	20	TRUE	AL	Octopus	alllowmapandsegdup	INDEL	10670	7018	4872	0.603234	0.686527	0.642191	6
HG002+HG003+HG004	NovaSeq	20	TRUE	AL	GATK4	alllowmapandsegdup	SNV	158345	159994	94236	0.49741	0.626908	0.554701	6
HG002+HG003+HG004	NovaSeq	20	TRUE	AL	GATK4	alllowmapandsegdup	INDEL	8855	8852	5595	0.500085	0.612803	0.550735	6
HG002+HG003+HG004	NovaSeq	20	TRUE	AL	FreeBayes	alllowmapandsegdup	SNV	166502	151962	92039	0.522828	0.644006	0.577125	6
HG002+HG003+HG004	NovaSeq	20	TRUE	AL	FreeBayes	alllowmapandsegdup	INDEL	8171	9556	11076	0.460935	0.424534	0.441986	6
HG002+HG003+HG004	NovaSeq	20	TRUE	AL	Octopus	notinalldifficult	SNV	2512836	1100853	816291	0.695366	0.754803	0.723867	6
HG002+HG003+HG004	NovaSeq	20	TRUE	AL	Octopus	notinalldifficult	INDEL	147152	55290	48883	0.726885	0.750641	0.738572	6
HG002+HG003+HG004	NovaSeq	20	TRUE	AL	GATK4	notinalldifficult	SNV	2348473	1265628	1027450	0.649808	0.695654	0.67195	6
HG002+HG003+HG004	NovaSeq	20	TRUE	AL	GATK4	notinalldifficult	INDEL	132143	70318	57167	0.652684	0.698024	0.674593	6
HG002+HG003+HG004	NovaSeq	20	TRUE	AL	FreeBayes	notinalldifficult	SNV	2269678	1344980	1058547	0.627909	0.681948	0.653814	6
HG002+HG003+HG004	NovaSeq	20	TRUE	AL	FreeBayes	notinalldifficult	INDEL	116738	85743	110742	0.576538	0.513179	0.543017	6
HG002+HG003+HG004	NovaSeq	20	TRUE	AL	Octopus	notinalllowmapandsegdup	SNV	2814794	1242435	914164	0.693773	0.754847	0.723022	6
HG002+HG003+HG004	NovaSeq	20	TRUE	AL	Octopus	notinalllowmapandsegdup	INDEL	363282	188474	175672	0.658411	0.67405	0.666139	6
HG002+HG003+HG004	NovaSeq	20	TRUE	AL	GATK4	notinalllowmapandsegdup	SNV	2632463	1425454	1155552	0.648723	0.694945	0.671039	6
HG002+HG003+HG004	NovaSeq	20	TRUE	AL	GATK4	notinalllowmapandsegdup	INDEL	317938	235810	177231	0.574156	0.64208	0.606221	6
HG002+HG003+HG004	NovaSeq	20	TRUE	AL	FreeBayes	notinalllowmapandsegdup	SNV	2541251	1517984	1182559	0.626042	0.682433	0.653022	6
HG002+HG003+HG004	NovaSeq	20	TRUE	AL	FreeBayes	notinalllowmapandsegdup	INDEL	274561	280475	201945	0.494672	0.576196	0.532331	6
HG002+HG003+HG004	NovaSeq	20	TRUE	AL	Octopus	AllTandemRepeatsandHomopolymers	SNV	129213	66857	42886	0.659015	0.750806	0.701922	6
HG002+HG003+HG004	NovaSeq	20	TRUE	AL	Octopus	AllTandemRepeatsandHomopolymers	INDEL	201868	128377	122515	0.611267	0.622314	0.616741	6
HG002+HG003+HG004	NovaSeq	20	TRUE	AL	GATK4	AllTandemRepeatsandHomopolymers	SNV	123094	73201	57339	0.627087	0.682214	0.65349	6
HG002+HG003+HG004	NovaSeq	20	TRUE	AL	GATK4	AllTandemRepeatsandHomopolymers	INDEL	172929	159303	114695	0.520507	0.601233	0.557965	6
HG002+HG003+HG004	NovaSeq	20	TRUE	AL	FreeBayes	AllTandemRepeatsandHomopolymers	SNV	116152	80821	53044	0.589685	0.686494	0.634417	6
HG002+HG003+HG004	NovaSeq	20	TRUE	AL	FreeBayes	AllTandemRepeatsandHomopolymers	INDEL	146507	186994	109462	0.4393	0.572362	0.49708	6
HG002+HG003+HG004	NovaSeq	20	TRUE	AL	Octopus	notinAllTandemRepeatsandHomopolymers	SNV	2873670	1305814	950035	0.687566	0.751541	0.718131	6
HG002+HG003+HG004	NovaSeq	20	TRUE	AL	Octopus	notinAllTandemRepeatsandHomopolymers	INDEL	172625	67385	58198	0.719241	0.747867	0.733275	6
HG002+HG003+HG004	NovaSeq	20	TRUE	AL	GATK4	notinAllTandemRepeatsandHomopolymers	SNV	2667714	1512247	1192449	0.638215	0.691088	0.6636	6
HG002+HG003+HG004	NovaSeq	20	TRUE	AL	GATK4	notinAllTandemRepeatsandHomopolymers	INDEL	154353	85682	68385	0.643044	0.69298	0.667079	6
HG002+HG003+HG004	NovaSeq	20	TRUE	AL	FreeBayes	notinAllTandemRepeatsandHomopolymers	SNV	2591601	1589125	1221554	0.619893	0.679647	0.648396	6
HG002+HG003+HG004	NovaSeq	20	TRUE	AL	FreeBayes	notinAllTandemRepeatsandHomopolymers	INDEL	136636	103440	132086	0.569136	0.508466	0.537093	6
HG002+HG003+HG004	NovaSeq	30	TRUE	AL	Octopus	genome	SNV	3501681	873453	734966	0.80036	0.826522	0.81323	6
HG002+HG003+HG004	NovaSeq	30	TRUE	AL	Octopus	genome	INDEL	433201	135561	138855	0.761656	0.75727	0.759457	6
HG002+HG003+HG004	NovaSeq	30	TRUE	AL	GATK4	genome	SNV	3168368	1207641	994488	0.724031	0.761104	0.742105	6
HG002+HG003+HG004	NovaSeq	30	TRUE	AL	GATK4	genome	INDEL	382212	189143	151827	0.668957	0.715701	0.69154	6
HG002+HG003+HG004	NovaSeq	30	TRUE	AL	FreeBayes	genome	SNV	3153831	1223809	980554	0.720441	0.76283	0.74103	6
HG002+HG003+HG004	NovaSeq	30	TRUE	AL	FreeBayes	genome	INDEL	339552	233277	181251	0.592763	0.651978	0.620962	6
HG002+HG003+HG004	NovaSeq	30	TRUE	AL	Octopus	alldifficult	SNV	573836	187830	142107	0.753396	0.801511	0.776709	6
HG002+HG003+HG004	NovaSeq	30	TRUE	AL	Octopus	alldifficult	INDEL	267205	99520	103517	0.728625	0.720769	0.724676	6
HG002+HG003+HG004	NovaSeq	30	TRUE	AL	GATK4	alldifficult	SNV	503396	258608	183667	0.660621	0.732678	0.694786	6
HG002+HG003+HG004	NovaSeq	30	TRUE	AL	GATK4	alldifficult	INDEL	233219	136071	106380	0.631533	0.686748	0.657985	6
HG002+HG003+HG004	NovaSeq	30	TRUE	AL	FreeBayes	alldifficult	SNV	512433	250560	177221	0.671609	0.743029	0.705516	6
HG002+HG003+HG004	NovaSeq	30	TRUE	AL	FreeBayes	alldifficult	INDEL	202920	167819	113142	0.547339	0.642026	0.590914	6
HG002+HG003+HG004	NovaSeq	30	TRUE	AL	Octopus	alllowmapandsegdup	SNV	221147	97142	69950	0.694799	0.759702	0.725803	6
HG002+HG003+HG004	NovaSeq	30	TRUE	AL	Octopus	alllowmapandsegdup	INDEL	12340	5335	4234	0.698161	0.74454	0.720605	6
HG002+HG003+HG004	NovaSeq	30	TRUE	AL	GATK4	alllowmapandsegdup	SNV	180366	137944	81264	0.566636	0.689393	0.622016	6
HG002+HG003+HG004	NovaSeq	30	TRUE	AL	GATK4	alllowmapandsegdup	INDEL	10026	7675	5015	0.566409	0.666578	0.612424	6
HG002+HG003+HG004	NovaSeq	30	TRUE	AL	FreeBayes	alllowmapandsegdup	SNV	195489	122978	81132	0.613844	0.706703	0.657009	6
HG002+HG003+HG004	NovaSeq	30	TRUE	AL	FreeBayes	alllowmapandsegdup	INDEL	9789	7934	10491	0.552333	0.482692	0.51517	6
HG002+HG003+HG004	NovaSeq	30	TRUE	AL	Octopus	notinalldifficult	SNV	2927845	685623	592859	0.810259	0.831608	0.820795	6
HG002+HG003+HG004	NovaSeq	30	TRUE	AL	Octopus	notinalldifficult	INDEL	166288	36141	35480	0.821463	0.824154	0.822807	6
HG002+HG003+HG004	NovaSeq	30	TRUE	AL	GATK4	notinalldifficult	SNV	2664972	949033	810821	0.737401	0.766723	0.751777	6
HG002+HG003+HG004	NovaSeq	30	TRUE	AL	GATK4	notinalldifficult	INDEL	149218	53238	45576	0.737039	0.76603	0.751255	6
HG002+HG003+HG004	NovaSeq	30	TRUE	AL	FreeBayes	notinalldifficult	SNV	2641398	973249	803333	0.730749	0.766794	0.748337	6
HG002+HG003+HG004	NovaSeq	30	TRUE	AL	FreeBayes	notinalldifficult	INDEL	136834	65649	90257	0.67578	0.602551	0.637068	6
HG002+HG003+HG004	NovaSeq	30	TRUE	AL	Octopus	notinalllowmapandsegdup	SNV	3280534	776311	665016	0.808642	0.831452	0.819888	6
HG002+HG003+HG004	NovaSeq	30	TRUE	AL	Octopus	notinalllowmapandsegdup	INDEL	420688	130187	134634	0.763672	0.757557	0.760602	6
HG002+HG003+HG004	NovaSeq	30	TRUE	AL	GATK4	notinalllowmapandsegdup	SNV	2988002	1069697	913224	0.736378	0.765914	0.750856	6
HG002+HG003+HG004	NovaSeq	30	TRUE	AL	GATK4	notinalllowmapandsegdup	INDEL	372017	181425	146774	0.672188	0.717085	0.693911	6
HG002+HG003+HG004	NovaSeq	30	TRUE	AL	FreeBayes	notinalllowmapandsegdup	SNV	2958342	1100831	899422	0.728804	0.766854	0.747345	6
HG002+HG003+HG004	NovaSeq	30	TRUE	AL	FreeBayes	notinalllowmapandsegdup	INDEL	329614	225281	171265	0.594011	0.658071	0.624403	6
HG002+HG003+HG004	NovaSeq	30	TRUE	AL	Octopus	AllTandemRepeatsandHomopolymers	SNV	152212	43685	31995	0.777	0.82631	0.800897	6
HG002+HG003+HG004	NovaSeq	30	TRUE	AL	Octopus	AllTandemRepeatsandHomopolymers	INDEL	238421	90949	96151	0.72387	0.712615	0.718198	6
HG002+HG003+HG004	NovaSeq	30	TRUE	AL	GATK4	AllTandemRepeatsandHomopolymers	SNV	140701	55472	46060	0.717229	0.753375	0.734858	6
HG002+HG003+HG004	NovaSeq	30	TRUE	AL	GATK4	AllTandemRepeatsandHomopolymers	INDEL	208259	123672	96969	0.627417	0.682306	0.653711	6
HG002+HG003+HG004	NovaSeq	30	TRUE	AL	FreeBayes	AllTandemRepeatsandHomopolymers	SNV	136268	60665	41336	0.691951	0.767257	0.727661	6
HG002+HG003+HG004	NovaSeq	30	TRUE	AL	FreeBayes	AllTandemRepeatsandHomopolymers	INDEL	179678	153677	95867	0.538999	0.652082	0.590172	6
HG002+HG003+HG004	NovaSeq	30	TRUE	AL	Octopus	notinAllTandemRepeatsandHomopolymers	SNV	3349469	829768	702971	0.801455	0.826531	0.8138	6
HG002+HG003+HG004	NovaSeq	30	TRUE	AL	Octopus	notinAllTandemRepeatsandHomopolymers	INDEL	195226	44768	42866	0.813462	0.81996	0.816698	6
HG002+HG003+HG004	NovaSeq	30	TRUE	AL	GATK4	notinAllTandemRepeatsandHomopolymers	SNV	3027667	1152169	948428	0.724351	0.761467	0.742445	6
HG002+HG003+HG004	NovaSeq	30	TRUE	AL	GATK4	notinAllTandemRepeatsandHomopolymers	INDEL	174335	65690	55019	0.72632	0.760113	0.742833	6
HG002+HG003+HG004	NovaSeq	30	TRUE	AL	FreeBayes	notinAllTandemRepeatsandHomopolymers	SNV	3017563	1163144	939218	0.721783	0.762631	0.741645	6
HG002+HG003+HG004	NovaSeq	30	TRUE	AL	FreeBayes	notinAllTandemRepeatsandHomopolymers	INDEL	160220	79859	109410	0.667364	0.594222	0.628672	6
HG002+HG003+HG004	NovaSeq	40	TRUE	AL	Octopus	genome	SNV	3769021	605930	551168	0.8615	0.87242	0.866926	6
HG002+HG003+HG004	NovaSeq	40	TRUE	AL	Octopus	genome	INDEL	468071	100215	107850	0.823654	0.812735	0.818158	6
HG002+HG003+HG004	NovaSeq	40	TRUE	AL	GATK4	genome	SNV	3413429	962463	804332	0.780053	0.809299	0.794407	6
HG002+HG003+HG004	NovaSeq	40	TRUE	AL	GATK4	genome	INDEL	417375	153860	125579	0.730654	0.768712	0.7492	6
HG002+HG003+HG004	NovaSeq	40	TRUE	AL	FreeBayes	genome	SNV	3442418	935165	790759	0.786374	0.8132	0.799562	6
HG002+HG003+HG004	NovaSeq	40	TRUE	AL	FreeBayes	genome	INDEL	380804	191930	156442	0.664888	0.708808	0.686146	6
HG002+HG003+HG004	NovaSeq	40	TRUE	AL	Octopus	alldifficult	SNV	619011	142559	117771	0.812809	0.840155	0.826256	6
HG002+HG003+HG004	NovaSeq	40	TRUE	AL	Octopus	alldifficult	INDEL	291665	74594	81921	0.796335	0.780717	0.788449	6
HG002+HG003+HG004	NovaSeq	40	TRUE	AL	GATK4	alldifficult	SNV	541323	220597	155154	0.710472	0.77723	0.742353	6
HG002+HG003+HG004	NovaSeq	40	TRUE	AL	GATK4	alldifficult	INDEL	257136	112035	89007	0.696523	0.742861	0.718946	6
HG002+HG003+HG004	NovaSeq	40	TRUE	AL	FreeBayes	alldifficult	SNV	561032	201907	150748	0.735356	0.78821	0.760866	6
HG002+HG003+HG004	NovaSeq	40	TRUE	AL	FreeBayes	alldifficult	INDEL	230566	140081	100033	0.622064	0.697419	0.657589	6
HG002+HG003+HG004	NovaSeq	40	TRUE	AL	Octopus	alllowmapandsegdup	SNV	239277	78987	63602	0.751819	0.790009	0.770441	6
HG002+HG003+HG004	NovaSeq	40	TRUE	AL	Octopus	alllowmapandsegdup	INDEL	13304	4366	3793	0.752915	0.778148	0.765323	6
HG002+HG003+HG004	NovaSeq	40	TRUE	AL	GATK4	alllowmapandsegdup	SNV	193595	124697	71493	0.608231	0.730305	0.663701	6
HG002+HG003+HG004	NovaSeq	40	TRUE	AL	GATK4	alllowmapandsegdup	INDEL	10933	6767	4269	0.617684	0.719182	0.66458	6
HG002+HG003+HG004	NovaSeq	40	TRUE	AL	FreeBayes	alllowmapandsegdup	SNV	214109	104349	73390	0.67233	0.74473	0.706681	6
HG002+HG003+HG004	NovaSeq	40	TRUE	AL	FreeBayes	alllowmapandsegdup	INDEL	10921	6806	10045	0.616066	0.520891	0.564495	6
HG002+HG003+HG004	NovaSeq	40	TRUE	AL	Octopus	notinalldifficult	SNV	3150010	463371	433397	0.871762	0.879054	0.875393	6
HG002+HG003+HG004	NovaSeq	40	TRUE	AL	Octopus	notinalldifficult	INDEL	176708	25711	26087	0.872981	0.871363	0.872171	6
HG002+HG003+HG004	NovaSeq	40	TRUE	AL	GATK4	notinalldifficult	SNV	2872106	741866	649178	0.794723	0.815642	0.805046	6
HG002+HG003+HG004	NovaSeq	40	TRUE	AL	GATK4	notinalldifficult	INDEL	160504	41951	36681	0.792789	0.813977	0.803243	6
HG002+HG003+HG004	NovaSeq	40	TRUE	AL	FreeBayes	notinalldifficult	SNV	2881386	733258	640011	0.797142	0.818251	0.807559	6
HG002+HG003+HG004	NovaSeq	40	TRUE	AL	FreeBayes	notinalldifficult	INDEL	150481	52000	74599	0.743186	0.668567	0.703904	6
HG002+HG003+HG004	NovaSeq	40	TRUE	AL	Octopus	notinalllowmapandsegdup	SNV	3529744	526943	487566	0.870105	0.878634	0.874349	6
HG002+HG003+HG004	NovaSeq	40	TRUE	AL	Octopus	notinalllowmapandsegdup	INDEL	454571	95833	104102	0.825886	0.813662	0.819728	6
HG002+HG003+HG004	NovaSeq	40	TRUE	AL	GATK4	notinalllowmapandsegdup	SNV	3219834	837766	732839	0.793532	0.814597	0.803926	6
HG002+HG003+HG004	NovaSeq	40	TRUE	AL	GATK4	notinalllowmapandsegdup	INDEL	406271	147052	121274	0.734238	0.770116	0.75175	6
HG002+HG003+HG004	NovaSeq	40	TRUE	AL	FreeBayes	notinalllowmapandsegdup	SNV	3228309	830816	717369	0.795321	0.818189	0.806593	6
HG002+HG003+HG004	NovaSeq	40	TRUE	AL	FreeBayes	notinalllowmapandsegdup	INDEL	369731	185065	146847	0.666427	0.715731	0.6902	6
HG002+HG003+HG004	NovaSeq	40	TRUE	AL	Octopus	AllTandemRepeatsandHomopolymers	SNV	164516	31312	24436	0.840105	0.870676	0.855117	6
HG002+HG003+HG004	NovaSeq	40	TRUE	AL	Octopus	AllTandemRepeatsandHomopolymers	INDEL	260942	67957	75849	0.79338	0.774789	0.783975	6
HG002+HG003+HG004	NovaSeq	40	TRUE	AL	GATK4	AllTandemRepeatsandHomopolymers	SNV	151826	44292	37634	0.774156	0.801362	0.787524	6
HG002+HG003+HG004	NovaSeq	40	TRUE	AL	GATK4	AllTandemRepeatsandHomopolymers	INDEL	230282	101531	81076	0.694011	0.739605	0.716083	6
HG002+HG003+HG004	NovaSeq	40	TRUE	AL	FreeBayes	AllTandemRepeatsandHomopolymers	SNV	150327	46557	33560	0.763531	0.817497	0.789593	6
HG002+HG003+HG004	NovaSeq	40	TRUE	AL	FreeBayes	AllTandemRepeatsandHomopolymers	INDEL	204818	128445	84201	0.614584	0.708666	0.65828	6
HG002+HG003+HG004	NovaSeq	40	TRUE	AL	Octopus	notinAllTandemRepeatsandHomopolymers	SNV	3604505	574618	526732	0.862503	0.8725	0.867473	6
HG002+HG003+HG004	NovaSeq	40	TRUE	AL	Octopus	notinAllTandemRepeatsandHomopolymers	INDEL	207603	32386	32156	0.865052	0.865882	0.865467	6
HG002+HG003+HG004	NovaSeq	40	TRUE	AL	GATK4	notinAllTandemRepeatsandHomopolymers	SNV	3261603	918171	766698	0.78033	0.809672	0.79473	6
HG002+HG003+HG004	NovaSeq	40	TRUE	AL	GATK4	notinAllTandemRepeatsandHomopolymers	INDEL	187514	52509	44652	0.781233	0.807672	0.794233	6
HG002+HG003+HG004	NovaSeq	40	TRUE	AL	FreeBayes	notinAllTandemRepeatsandHomopolymers	SNV	3292091	888608	757199	0.78745	0.813005	0.800023	6
HG002+HG003+HG004	NovaSeq	40	TRUE	AL	FreeBayes	notinAllTandemRepeatsandHomopolymers	INDEL	176381	63696	91987	0.734685	0.657236	0.693806	6
HG002+HG003+HG004	NovaSeq	50	TRUE	AL	Octopus	genome	SNV	3923888	450883	426657	0.896936	0.90193	0.899426	6
HG002+HG003+HG004	NovaSeq	50	TRUE	AL	Octopus	genome	INDEL	490212	77770	86160	0.863077	0.850513	0.856749	6
HG002+HG003+HG004	NovaSeq	50	TRUE	AL	GATK4	genome	SNV	3591471	784384	658342	0.820747	0.845089	0.83274	6
HG002+HG003+HG004	NovaSeq	50	TRUE	AL	GATK4	genome	INDEL	442299	128827	105298	0.774433	0.807709	0.790721	6
HG002+HG003+HG004	NovaSeq	50	TRUE	AL	FreeBayes	genome	SNV	3626324	751168	661404	0.828402	0.845745	0.836984	6
HG002+HG003+HG004	NovaSeq	50	TRUE	AL	FreeBayes	genome	INDEL	410330	162319	138685	0.716547	0.747393	0.731645	6
HG002+HG003+HG004	NovaSeq	50	TRUE	AL	Octopus	alldifficult	SNV	645385	116108	101080	0.847526	0.864588	0.855972	6
HG002+HG003+HG004	NovaSeq	50	TRUE	AL	Octopus	alldifficult	INDEL	307217	58742	66703	0.839485	0.821612	0.830452	6
HG002+HG003+HG004	NovaSeq	50	TRUE	AL	GATK4	alldifficult	SNV	569369	192503	132675	0.747329	0.811016	0.777871	6
HG002+HG003+HG004	NovaSeq	50	TRUE	AL	GATK4	alldifficult	INDEL	273796	95267	75537	0.741868	0.783768	0.762243	6
HG002+HG003+HG004	NovaSeq	50	TRUE	AL	FreeBayes	alldifficult	SNV	592078	170804	133031	0.776107	0.816537	0.795809	6
HG002+HG003+HG004	NovaSeq	50	TRUE	AL	FreeBayes	alldifficult	INDEL	251228	119336	90380	0.677961	0.735428	0.705526	6
HG002+HG003+HG004	NovaSeq	50	TRUE	AL	Octopus	alllowmapandsegdup	SNV	249584	68691	59411	0.784177	0.807728	0.795779	6
HG002+HG003+HG004	NovaSeq	50	TRUE	AL	Octopus	alllowmapandsegdup	INDEL	13857	3813	3478	0.784211	0.799365	0.791715	6
HG002+HG003+HG004	NovaSeq	50	TRUE	AL	GATK4	alllowmapandsegdup	SNV	203403	114898	64072	0.639027	0.760456	0.694474	6
HG002+HG003+HG004	NovaSeq	50	TRUE	AL	GATK4	alllowmapandsegdup	INDEL	11476	6226	3905	0.648288	0.746115	0.69377	6
HG002+HG003+HG004	NovaSeq	50	TRUE	AL	FreeBayes	alllowmapandsegdup	SNV	226147	92302	68178	0.710151	0.768358	0.738109	6
HG002+HG003+HG004	NovaSeq	50	TRUE	AL	FreeBayes	alllowmapandsegdup	INDEL	11597	6126	9670	0.654347	0.545305	0.59487	6
HG002+HG003+HG004	NovaSeq	50	TRUE	AL	Octopus	notinalldifficult	SNV	3278503	334775	325577	0.907349	0.909664	0.908505	6
HG002+HG003+HG004	NovaSeq	50	TRUE	AL	Octopus	notinalldifficult	INDEL	183328	19087	19595	0.905704	0.903436	0.904569	6
HG002+HG003+HG004	NovaSeq	50	TRUE	AL	GATK4	notinalldifficult	SNV	3022102	591881	525667	0.836225	0.851832	0.843956	6
HG002+HG003+HG004	NovaSeq	50	TRUE	AL	GATK4	notinalldifficult	INDEL	168809	33645	29824	0.833814	0.849854	0.841758	6
HG002+HG003+HG004	NovaSeq	50	TRUE	AL	FreeBayes	notinalldifficult	SNV	3034246	580364	528373	0.839439	0.85169	0.84552	6
HG002+HG003+HG004	NovaSeq	50	TRUE	AL	FreeBayes	notinalldifficult	INDEL	159388	43090	63764	0.787187	0.714258	0.748951	6
HG002+HG003+HG004	NovaSeq	50	TRUE	AL	Octopus	notinalllowmapandsegdup	SNV	3674304	382192	367246	0.905783	0.909132	0.907454	6
HG002+HG003+HG004	NovaSeq	50	TRUE	AL	Octopus	notinalllowmapandsegdup	INDEL	476161	73939	82729	0.86559	0.851976	0.858729	6
HG002+HG003+HG004	NovaSeq	50	TRUE	AL	GATK4	notinalllowmapandsegdup	SNV	3388068	669486	594270	0.835003	0.850774	0.842814	6
HG002+HG003+HG004	NovaSeq	50	TRUE	AL	GATK4	notinalllowmapandsegdup	INDEL	430650	122563	101354	0.778452	0.809486	0.793666	6
HG002+HG003+HG004	NovaSeq	50	TRUE	AL	FreeBayes	notinalllowmapandsegdup	SNV	3400177	658866	593226	0.837679	0.851449	0.844508	6
HG002+HG003+HG004	NovaSeq	50	TRUE	AL	FreeBayes	notinalllowmapandsegdup	INDEL	398577	156138	129422	0.718526	0.754882	0.736255	6
HG002+HG003+HG004	NovaSeq	50	TRUE	AL	Octopus	AllTandemRepeatsandHomopolymers	SNV	172042	23732	19023	0.878779	0.900437	0.889476	6
HG002+HG003+HG004	NovaSeq	50	TRUE	AL	Octopus	AllTandemRepeatsandHomopolymers	INDEL	275274	53333	61602	0.8377	0.817137	0.827291	6
HG002+HG003+HG004	NovaSeq	50	TRUE	AL	GATK4	AllTandemRepeatsandHomopolymers	SNV	160071	36000	30813	0.816393	0.838577	0.827337	6
HG002+HG003+HG004	NovaSeq	50	TRUE	AL	GATK4	AllTandemRepeatsandHomopolymers	INDEL	245583	86121	68640	0.740368	0.781556	0.760405	6
HG002+HG003+HG004	NovaSeq	50	TRUE	AL	FreeBayes	AllTandemRepeatsandHomopolymers	SNV	159165	37685	28366	0.80856	0.84874	0.828163	6
HG002+HG003+HG004	NovaSeq	50	TRUE	AL	FreeBayes	AllTandemRepeatsandHomopolymers	INDEL	223934	109246	75597	0.672111	0.747615	0.707856	6
HG002+HG003+HG004	NovaSeq	50	TRUE	AL	Octopus	notinAllTandemRepeatsandHomopolymers	SNV	3751846	427151	407634	0.897786	0.901999	0.899888	6
HG002+HG003+HG004	NovaSeq	50	TRUE	AL	Octopus	notinAllTandemRepeatsandHomopolymers	INDEL	215452	24525	24692	0.897803	0.897178	0.89749	6
HG002+HG003+HG004	NovaSeq	50	TRUE	AL	GATK4	notinAllTandemRepeatsandHomopolymers	SNV	3431400	748384	627529	0.820952	0.845395	0.832994	6
HG002+HG003+HG004	NovaSeq	50	TRUE	AL	GATK4	notinAllTandemRepeatsandHomopolymers	INDEL	197198	42825	36750	0.82158	0.842914	0.83211	6
HG002+HG003+HG004	NovaSeq	50	TRUE	AL	FreeBayes	notinAllTandemRepeatsandHomopolymers	SNV	3467159	713483	633038	0.829336	0.845608	0.837393	6
HG002+HG003+HG004	NovaSeq	50	TRUE	AL	FreeBayes	notinAllTandemRepeatsandHomopolymers	INDEL	186845	53228	79847	0.778284	0.700602	0.737403	6
HG002+HG003+HG004	NovaSeq	60	TRUE	AL	Octopus	genome	SNV	4022106	352331	340931	0.919457	0.921859	0.920656	6
HG002+HG003+HG004	NovaSeq	60	TRUE	AL	Octopus	genome	INDEL	505370	62381	70583	0.890126	0.87745	0.883743	6
HG002+HG003+HG004	NovaSeq	60	TRUE	AL	GATK4	genome	SNV	3723202	652595	547765	0.850863	0.871747	0.861178	6
HG002+HG003+HG004	NovaSeq	60	TRUE	AL	GATK4	genome	INDEL	460475	110624	89974	0.806296	0.836544	0.821142	6
HG002+HG003+HG004	NovaSeq	60	TRUE	AL	FreeBayes	genome	SNV	3755249	622234	559943	0.857856	0.870239	0.864003	6
HG002+HG003+HG004	NovaSeq	60	TRUE	AL	FreeBayes	genome	INDEL	430993	141582	125408	0.752728	0.774609	0.763511	6
HG002+HG003+HG004	NovaSeq	60	TRUE	AL	Octopus	alldifficult	SNV	662028	99384	89765	0.869474	0.880599	0.875001	6
HG002+HG003+HG004	NovaSeq	60	TRUE	AL	Octopus	alldifficult	INDEL	317929	47817	55487	0.869262	0.851407	0.860242	6
HG002+HG003+HG004	NovaSeq	60	TRUE	AL	GATK4	alldifficult	SNV	590355	171479	115106	0.774913	0.836836	0.804685	6
HG002+HG003+HG004	NovaSeq	60	TRUE	AL	GATK4	alldifficult	INDEL	286179	82855	65124	0.775481	0.814622	0.79457	6
HG002+HG003+HG004	NovaSeq	60	TRUE	AL	FreeBayes	alldifficult	SNV	613692	149178	118836	0.804452	0.837773	0.820774	6
HG002+HG003+HG004	NovaSeq	60	TRUE	AL	FreeBayes	alldifficult	INDEL	265873	104616	82823	0.717627	0.762478	0.739373	6
HG002+HG003+HG004	NovaSeq	60	TRUE	AL	Octopus	alllowmapandsegdup	SNV	256066	62166	56843	0.804652	0.81834	0.811438	6
HG002+HG003+HG004	NovaSeq	60	TRUE	AL	Octopus	alllowmapandsegdup	INDEL	14208	3459	3334	0.804211	0.809942	0.807066	6
HG002+HG003+HG004	NovaSeq	60	TRUE	AL	GATK4	alllowmapandsegdup	SNV	210843	107445	58009	0.662428	0.784234	0.718203	6
HG002+HG003+HG004	NovaSeq	60	TRUE	AL	GATK4	alllowmapandsegdup	INDEL	11874	5826	3585	0.670847	0.768096	0.716186	6
HG002+HG003+HG004	NovaSeq	60	TRUE	AL	FreeBayes	alllowmapandsegdup	SNV	234258	84182	63860	0.735643	0.78579	0.75989	6
HG002+HG003+HG004	NovaSeq	60	TRUE	AL	FreeBayes	alllowmapandsegdup	INDEL	12001	5721	9451	0.677181	0.559435	0.612702	6
HG002+HG003+HG004	NovaSeq	60	TRUE	AL	Octopus	notinalldifficult	SNV	3360078	252947	251166	0.92999	0.930449	0.93022	6
HG002+HG003+HG004	NovaSeq	60	TRUE	AL	Octopus	notinalldifficult	INDEL	187790	14606	15199	0.927835	0.925124	0.926477	6
HG002+HG003+HG004	NovaSeq	60	TRUE	AL	GATK4	notinalldifficult	SNV	3132847	481116	432659	0.866873	0.878654	0.872724	6
HG002+HG003+HG004	NovaSeq	60	TRUE	AL	GATK4	notinalldifficult	INDEL	174598	27858	24925	0.8624	0.875077	0.868692	6
HG002+HG003+HG004	NovaSeq	60	TRUE	AL	FreeBayes	notinalldifficult	SNV	3141557	473056	441107	0.869127	0.876877	0.872985	6
HG002+HG003+HG004	NovaSeq	60	TRUE	AL	FreeBayes	notinalldifficult	INDEL	165438	37042	55937	0.817058	0.74732	0.780635	6
HG002+HG003+HG004	NovaSeq	60	TRUE	AL	Octopus	notinalllowmapandsegdup	SNV	3766040	290165	284088	0.928464	0.929857	0.92916	6
HG002+HG003+HG004	NovaSeq	60	TRUE	AL	Octopus	notinalllowmapandsegdup	INDEL	490968	58904	67301	0.892877	0.879447	0.886111	6
HG002+HG003+HG004	NovaSeq	60	TRUE	AL	GATK4	notinalllowmapandsegdup	SNV	3512359	545150	489756	0.865644	0.877626	0.871594	6
HG002+HG003+HG004	NovaSeq	60	TRUE	AL	GATK4	notinalllowmapandsegdup	INDEL	448428	104760	86355	0.810625	0.838523	0.824338	6
HG002+HG003+HG004	NovaSeq	60	TRUE	AL	FreeBayes	notinalllowmapandsegdup	SNV	3520991	538052	496083	0.867444	0.876506	0.871951	6
HG002+HG003+HG004	NovaSeq	60	TRUE	AL	FreeBayes	notinalllowmapandsegdup	INDEL	418833	135809	116324	0.755141	0.782636	0.768643	6
HG002+HG003+HG004	NovaSeq	60	TRUE	AL	Octopus	AllTandemRepeatsandHomopolymers	SNV	176817	18925	15254	0.903317	0.920581	0.911867	6
HG002+HG003+HG004	NovaSeq	60	TRUE	AL	Octopus	AllTandemRepeatsandHomopolymers	INDEL	285216	43182	50971	0.868507	0.848385	0.858328	6
HG002+HG003+HG004	NovaSeq	60	TRUE	AL	GATK4	AllTandemRepeatsandHomopolymers	SNV	166257	29807	25625	0.847973	0.866454	0.857114	6
HG002+HG003+HG004	NovaSeq	60	TRUE	AL	GATK4	AllTandemRepeatsandHomopolymers	INDEL	256911	74767	59128	0.77458	0.812909	0.793282	6
HG002+HG003+HG004	NovaSeq	60	TRUE	AL	FreeBayes	AllTandemRepeatsandHomopolymers	SNV	165346	31502	24245	0.839968	0.872119	0.855742	6
HG002+HG003+HG004	NovaSeq	60	TRUE	AL	FreeBayes	AllTandemRepeatsandHomopolymers	INDEL	237509	95600	68847	0.713007	0.775271	0.742837	6
HG002+HG003+HG004	NovaSeq	60	TRUE	AL	Octopus	notinAllTandemRepeatsandHomopolymers	SNV	3845289	333406	325677	0.920213	0.921918	0.921065	6
HG002+HG003+HG004	NovaSeq	60	TRUE	AL	Octopus	notinAllTandemRepeatsandHomopolymers	INDEL	220695	19259	19700	0.919739	0.918052	0.918894	6
HG002+HG003+HG004	NovaSeq	60	TRUE	AL	GATK4	notinAllTandemRepeatsandHomopolymers	SNV	3556945	622788	522140	0.850998	0.871996	0.861369	6
HG002+HG003+HG004	NovaSeq	60	TRUE	AL	GATK4	notinAllTandemRepeatsandHomopolymers	INDEL	204040	35982	30947	0.850089	0.868303	0.8591	6
HG002+HG003+HG004	NovaSeq	60	TRUE	AL	FreeBayes	notinAllTandemRepeatsandHomopolymers	SNV	3589903	590732	535698	0.858698	0.870153	0.864387	6
HG002+HG003+HG004	NovaSeq	60	TRUE	AL	FreeBayes	notinAllTandemRepeatsandHomopolymers	INDEL	193951	46120	71044	0.80789	0.731904	0.768022	6
HG002+HG003+HG004	NovaSeq	70	TRUE	AL	Octopus	genome	SNV	4090730	283853	278874	0.935113	0.936179	0.935646	6
HG002+HG003+HG004	NovaSeq	70	TRUE	AL	Octopus	genome	INDEL	516270	51410	59186	0.909438	0.897149	0.903252	6
HG002+HG003+HG004	NovaSeq	70	TRUE	AL	GATK4	genome	SNV	3822422	553325	462928	0.873547	0.891974	0.882665	6
HG002+HG003+HG004	NovaSeq	70	TRUE	AL	GATK4	genome	INDEL	475666	95392	76682	0.832956	0.861171	0.846828	6
HG002+HG003+HG004	NovaSeq	70	TRUE	AL	FreeBayes	genome	SNV	3850238	527231	482010	0.879558	0.888739	0.884125	6
HG002+HG003+HG004	NovaSeq	70	TRUE	AL	FreeBayes	genome	INDEL	447015	125524	113793	0.780759	0.797091	0.78884	6
HG002+HG003+HG004	NovaSeq	70	TRUE	AL	Octopus	alldifficult	SNV	674099	87327	81392	0.885311	0.892266	0.888775	6
HG002+HG003+HG004	NovaSeq	70	TRUE	AL	Octopus	alldifficult	INDEL	325660	40012	47247	0.89058	0.873301	0.881856	6
HG002+HG003+HG004	NovaSeq	70	TRUE	AL	GATK4	alldifficult	SNV	605977	155820	102067	0.795457	0.855847	0.824548	6
HG002+HG003+HG004	NovaSeq	70	TRUE	AL	GATK4	alldifficult	INDEL	296468	72527	56103	0.803447	0.840875	0.821735	6
HG002+HG003+HG004	NovaSeq	70	TRUE	AL	FreeBayes	alldifficult	SNV	629735	133117	108330	0.825501	0.853224	0.839134	6
HG002+HG003+HG004	NovaSeq	70	TRUE	AL	FreeBayes	alldifficult	INDEL	277232	93219	75779	0.748363	0.785335	0.766404	6
HG002+HG003+HG004	NovaSeq	70	TRUE	AL	Octopus	alllowmapandsegdup	SNV	260760	57480	54938	0.819382	0.825979	0.822667	6
HG002+HG003+HG004	NovaSeq	70	TRUE	AL	Octopus	alllowmapandsegdup	INDEL	14487	3175	3204	0.820236	0.818891	0.819563	6
HG002+HG003+HG004	NovaSeq	70	TRUE	AL	GATK4	alllowmapandsegdup	SNV	216511	101775	53367	0.68024	0.802255	0.736227	6
HG002+HG003+HG004	NovaSeq	70	TRUE	AL	GATK4	alllowmapandsegdup	INDEL	12233	5465	3307	0.691208	0.787194	0.736085	6
HG002+HG003+HG004	NovaSeq	70	TRUE	AL	FreeBayes	alllowmapandsegdup	SNV	240360	78083	60812	0.754798	0.798082	0.775837	6
HG002+HG003+HG004	NovaSeq	70	TRUE	AL	FreeBayes	alllowmapandsegdup	INDEL	12393	5328	9227	0.69934	0.573219	0.63003	6
HG002+HG003+HG004	NovaSeq	70	TRUE	AL	Octopus	notinalldifficult	SNV	3416631	196526	197482	0.945608	0.945358	0.945483	6
HG002+HG003+HG004	NovaSeq	70	TRUE	AL	Octopus	notinalldifficult	INDEL	190962	11438	12071	0.943488	0.940547	0.942015	6
HG002+HG003+HG004	NovaSeq	70	TRUE	AL	GATK4	notinalldifficult	SNV	3216445	397505	360861	0.890008	0.899125	0.894543	6
HG002+HG003+HG004	NovaSeq	70	TRUE	AL	GATK4	notinalldifficult	INDEL	179537	22917	20627	0.886804	0.89695	0.891848	6
HG002+HG003+HG004	NovaSeq	70	TRUE	AL	FreeBayes	notinalldifficult	SNV	3220503	394114	373680	0.890967	0.896032	0.893492	6
HG002+HG003+HG004	NovaSeq	70	TRUE	AL	FreeBayes	notinalldifficult	INDEL	170109	32371	49564	0.840127	0.774374	0.805912	6
HG002+HG003+HG004	NovaSeq	70	TRUE	AL	Octopus	notinalllowmapandsegdup	SNV	3829970	226373	223936	0.944193	0.94476	0.944477	6
HG002+HG003+HG004	NovaSeq	70	TRUE	AL	Octopus	notinalllowmapandsegdup	INDEL	501586	48220	56051	0.912296	0.899485	0.905845	6
HG002+HG003+HG004	NovaSeq	70	TRUE	AL	GATK4	notinalllowmapandsegdup	SNV	3605911	451550	409561	0.888711	0.898004	0.893334	6
HG002+HG003+HG004	NovaSeq	70	TRUE	AL	GATK4	notinalllowmapandsegdup	INDEL	463254	89895	73348	0.837485	0.86331	0.850202	6
HG002+HG003+HG004	NovaSeq	70	TRUE	AL	FreeBayes	notinalllowmapandsegdup	SNV	3609878	449148	421198	0.889346	0.895512	0.892418	6
HG002+HG003+HG004	NovaSeq	70	TRUE	AL	FreeBayes	notinalllowmapandsegdup	INDEL	434458	120149	104897	0.783362	0.805514	0.794284	6
HG002+HG003+HG004	NovaSeq	70	TRUE	AL	Octopus	AllTandemRepeatsandHomopolymers	SNV	180462	15274	12328	0.921966	0.936055	0.928957	6
HG002+HG003+HG004	NovaSeq	70	TRUE	AL	Octopus	AllTandemRepeatsandHomopolymers	INDEL	292337	35980	43194	0.890411	0.871267	0.880735	6
HG002+HG003+HG004	NovaSeq	70	TRUE	AL	GATK4	AllTandemRepeatsandHomopolymers	SNV	170807	25220	21747	0.871344	0.88706	0.879132	6
HG002+HG003+HG004	NovaSeq	70	TRUE	AL	GATK4	AllTandemRepeatsandHomopolymers	INDEL	266384	65255	50814	0.803235	0.839804	0.821112	6
HG002+HG003+HG004	NovaSeq	70	TRUE	AL	FreeBayes	AllTandemRepeatsandHomopolymers	SNV	170135	26694	21031	0.86438	0.889986	0.876996	6
HG002+HG003+HG004	NovaSeq	70	TRUE	AL	FreeBayes	AllTandemRepeatsandHomopolymers	INDEL	248085	84985	62388	0.744843	0.799055	0.770997	6
HG002+HG003+HG004	NovaSeq	70	TRUE	AL	Octopus	notinAllTandemRepeatsandHomopolymers	SNV	3910268	268579	266546	0.935729	0.936184	0.935957	6
HG002+HG003+HG004	NovaSeq	70	TRUE	AL	Octopus	notinAllTandemRepeatsandHomopolymers	INDEL	224480	15485	16096	0.93547	0.933094	0.93428	6
HG002+HG003+HG004	NovaSeq	70	TRUE	AL	GATK4	notinAllTandemRepeatsandHomopolymers	SNV	3651615	528105	441181	0.873651	0.892205	0.882831	6
HG002+HG003+HG004	NovaSeq	70	TRUE	AL	GATK4	notinAllTandemRepeatsandHomopolymers	INDEL	209792	30228	25947	0.87406	0.889933	0.881926	6
HG002+HG003+HG004	NovaSeq	70	TRUE	AL	FreeBayes	notinAllTandemRepeatsandHomopolymers	SNV	3680103	500537	460979	0.880273	0.888682	0.884457	6
HG002+HG003+HG004	NovaSeq	70	TRUE	AL	FreeBayes	notinAllTandemRepeatsandHomopolymers	INDEL	199416	40656	63884	0.830651	0.757372	0.792321	6
HG002+HG003+HG004	NovaSeq	80	TRUE	AL	Octopus	genome	SNV	4140008	234527	233196	0.946388	0.946676	0.946532	6
HG002+HG003+HG004	NovaSeq	80	TRUE	AL	Octopus	genome	INDEL	524399	43207	50300	0.923879	0.912476	0.918142	6
HG002+HG003+HG004	NovaSeq	80	TRUE	AL	GATK4	genome	SNV	3899978	475795	395813	0.891266	0.90786	0.899487	6
HG002+HG003+HG004	NovaSeq	80	TRUE	AL	GATK4	genome	INDEL	487324	83738	66609	0.853364	0.879753	0.866358	6
HG002+HG003+HG004	NovaSeq	80	TRUE	AL	FreeBayes	genome	SNV	3921845	455588	420744	0.895923	0.903112	0.899503	6
HG002+HG003+HG004	NovaSeq	80	TRUE	AL	FreeBayes	genome	INDEL	459434	113052	104667	0.802524	0.814453	0.808445	6
HG002+HG003+HG004	NovaSeq	80	TRUE	AL	Octopus	alldifficult	SNV	683004	78406	74977	0.897025	0.901083	0.89905	6
HG002+HG003+HG004	NovaSeq	80	TRUE	AL	Octopus	alldifficult	INDEL	331627	33977	40530	0.907066	0.891094	0.899009	6
HG002+HG003+HG004	NovaSeq	80	TRUE	AL	GATK4	alldifficult	SNV	618370	143448	91580	0.811703	0.871005	0.840309	6
HG002+HG003+HG004	NovaSeq	80	TRUE	AL	GATK4	alldifficult	INDEL	304488	64512	49184	0.825171	0.860933	0.842673	6
HG002+HG003+HG004	NovaSeq	80	TRUE	AL	FreeBayes	alldifficult	SNV	641480	121338	99977	0.840935	0.865161	0.852876	6
HG002+HG003+HG004	NovaSeq	80	TRUE	AL	FreeBayes	alldifficult	INDEL	286232	84164	70298	0.772773	0.802827	0.787513	6
HG002+HG003+HG004	NovaSeq	80	TRUE	AL	Octopus	alllowmapandsegdup	SNV	264370	53860	53330	0.830751	0.832137	0.831444	6
HG002+HG003+HG004	NovaSeq	80	TRUE	AL	Octopus	alllowmapandsegdup	INDEL	14633	3028	3147	0.828549	0.823003	0.825767	6
HG002+HG003+HG004	NovaSeq	80	TRUE	AL	GATK4	alllowmapandsegdup	SNV	220805	97482	49887	0.693729	0.815706	0.749789	6
HG002+HG003+HG004	NovaSeq	80	TRUE	AL	GATK4	alllowmapandsegdup	INDEL	12482	5221	3090	0.705078	0.801567	0.750233	6
HG002+HG003+HG004	NovaSeq	80	TRUE	AL	FreeBayes	alllowmapandsegdup	SNV	244811	73628	58302	0.768785	0.807656	0.787741	6
HG002+HG003+HG004	NovaSeq	80	TRUE	AL	FreeBayes	alllowmapandsegdup	INDEL	12676	5044	9099	0.71535	0.582135	0.641904	6
HG002+HG003+HG004	NovaSeq	80	TRUE	AL	Octopus	notinalldifficult	SNV	3457004	156121	158219	0.956791	0.956235	0.956513	6
HG002+HG003+HG004	NovaSeq	80	TRUE	AL	Octopus	notinalldifficult	INDEL	193141	9252	9882	0.954287	0.951326	0.952804	6
HG002+HG003+HG004	NovaSeq	80	TRUE	AL	GATK4	notinalldifficult	SNV	3281608	332347	304233	0.908038	0.915157	0.911584	6
HG002+HG003+HG004	NovaSeq	80	TRUE	AL	GATK4	notinalldifficult	INDEL	183179	19274	17466	0.904798	0.912951	0.908856	6
HG002+HG003+HG004	NovaSeq	80	TRUE	AL	FreeBayes	notinalldifficult	SNV	3280365	334250	320767	0.907528	0.910926	0.909224	6
HG002+HG003+HG004	NovaSeq	80	TRUE	AL	FreeBayes	notinalldifficult	INDEL	173547	28935	44515	0.857098	0.795861	0.825345	6
[truncated: 1,362 more rows]
