# Supplementary material for: Benchmarking small-variant genotyping in polyploids
Source: Genome Res. 2022 Feb;32(2):403–8. doi: 10.1101/gr.275579.121 (PMC8805713; doi:10.1101/gr.275579.121)
Supplement: Supplemental Material [file supp_gr.275579.121_Supplemental_Table_S3.xlsx]

## Sheet: Supplemental Table 3
Supplemental Table S3: Biallelic genotyping errors in diploid and synthetic polyploid datasets.
Sample	Library	Depth	Filtered	Match	Caller	Stratification	GT	Error	Count	Fraction	Truth-fraction
HG002+HG003+HG004	NovaSeq	10	TRUE	GT	Octopus	genome	aaaaaa	FN	14699	0.00581015	0.0179891
HG002+HG003+HG004	NovaSeq	10	TRUE	GT	Octopus	genome	aaaaaa	FP	105851	0.0699784
HG002+HG003+HG004	NovaSeq	10	TRUE	GT	Octopus	genome	Aaaaaa	FN	176363	0.0697119	0.430038
HG002+HG003+HG004	NovaSeq	10	TRUE	GT	Octopus	genome	Aaaaaa	FP	156712	0.103603
HG002+HG003+HG004	NovaSeq	10	TRUE	GT	Octopus	genome	AAaaaa	FN	306816	0.121277	0.515091
HG002+HG003+HG004	NovaSeq	10	TRUE	GT	Octopus	genome	AAaaaa	FP	308655	0.204053
HG002+HG003+HG004	NovaSeq	10	TRUE	GT	Octopus	genome	AAAaaa	FN	418771	0.16553	0.543052
HG002+HG003+HG004	NovaSeq	10	TRUE	GT	Octopus	genome	AAAaaa	FP	445589	0.29458
HG002+HG003+HG004	NovaSeq	10	TRUE	GT	Octopus	genome	AAAAaa	FN	688829	0.272277	0.556181
HG002+HG003+HG004	NovaSeq	10	TRUE	GT	Octopus	genome	AAAAaa	FP	396138	0.261888
HG002+HG003+HG004	NovaSeq	10	TRUE	GT	Octopus	genome	AAAAAa	FN	924405	0.365394	0.867752
HG002+HG003+HG004	NovaSeq	10	TRUE	GT	Octopus	genome	AAAAAa	FP	99678	0.0658975
HG002+HG003+HG004	NovaSeq	10	TRUE	GT	GATK4	genome	aaaaaa	FN	35724	0.0136181	0.0437202
HG002+HG003+HG004	NovaSeq	10	TRUE	GT	GATK4	genome	aaaaaa	FP	105337	0.0618499
HG002+HG003+HG004	NovaSeq	10	TRUE	GT	GATK4	genome	Aaaaaa	FN	189279	0.0721537	0.461532
HG002+HG003+HG004	NovaSeq	10	TRUE	GT	GATK4	genome	Aaaaaa	FP	195026	0.114512
HG002+HG003+HG004	NovaSeq	10	TRUE	GT	GATK4	genome	AAaaaa	FN	372052	0.141827	0.624611
HG002+HG003+HG004	NovaSeq	10	TRUE	GT	GATK4	genome	AAaaaa	FP	291025	0.170879
HG002+HG003+HG004	NovaSeq	10	TRUE	GT	GATK4	genome	AAAaaa	FN	476802	0.181758	0.618306
HG002+HG003+HG004	NovaSeq	10	TRUE	GT	GATK4	genome	AAAaaa	FP	443300	0.260289
HG002+HG003+HG004	NovaSeq	10	TRUE	GT	GATK4	genome	AAAAaa	FN	770927	0.29388	0.622469
HG002+HG003+HG004	NovaSeq	10	TRUE	GT	GATK4	genome	AAAAaa	FP	401105	0.235514
HG002+HG003+HG004	NovaSeq	10	TRUE	GT	GATK4	genome	AAAAAa	FN	778490	0.296763	0.73078
HG002+HG003+HG004	NovaSeq	10	TRUE	GT	GATK4	genome	AAAAAa	FP	267314	0.156957
HG002+HG003+HG004	NovaSeq	10	TRUE	GT	FreeBayes	genome	aaaaaa	FN	43016	0.0150694	0.0526443
HG002+HG003+HG004	NovaSeq	10	TRUE	GT	FreeBayes	genome	aaaaaa	FP	94013	0.060208
HG002+HG003+HG004	NovaSeq	10	TRUE	GT	FreeBayes	genome	Aaaaaa	FN	278245	0.0974751	0.678464
HG002+HG003+HG004	NovaSeq	10	TRUE	GT	FreeBayes	genome	Aaaaaa	FP	126579	0.081064
HG002+HG003+HG004	NovaSeq	10	TRUE	GT	FreeBayes	genome	AAaaaa	FN	357177	0.125127	0.599638
HG002+HG003+HG004	NovaSeq	10	TRUE	GT	FreeBayes	genome	AAaaaa	FP	310526	0.198868
HG002+HG003+HG004	NovaSeq	10	TRUE	GT	FreeBayes	genome	AAAaaa	FN	481433	0.168656	0.624311
HG002+HG003+HG004	NovaSeq	10	TRUE	GT	FreeBayes	genome	AAAaaa	FP	436021	0.279238
HG002+HG003+HG004	NovaSeq	10	TRUE	GT	FreeBayes	genome	AAAAaa	FN	817964	0.28655	0.660448
HG002+HG003+HG004	NovaSeq	10	TRUE	GT	FreeBayes	genome	AAAAaa	FP	354439	0.226991
HG002+HG003+HG004	NovaSeq	10	TRUE	GT	FreeBayes	genome	AAAAAa	FN	876688	0.307122	0.822959
HG002+HG003+HG004	NovaSeq	10	TRUE	GT	FreeBayes	genome	AAAAAa	FP	239892	0.153632
HG002+HG003+HG004	NovaSeq	10	TRUE	GT	Octopus	alldifficult	aaaaaa	FN	9472	0.0159131	0.0115921
HG002+HG003+HG004	NovaSeq	10	TRUE	GT	Octopus	alldifficult	aaaaaa	FP	31528	0.0896255
HG002+HG003+HG004	NovaSeq	10	TRUE	GT	Octopus	alldifficult	Aaaaaa	FN	43908	0.0737663	0.107064
HG002+HG003+HG004	NovaSeq	10	TRUE	GT	Octopus	alldifficult	Aaaaaa	FP	34760	0.0988132
HG002+HG003+HG004	NovaSeq	10	TRUE	GT	Octopus	alldifficult	AAaaaa	FN	70483	0.118413	0.118329
HG002+HG003+HG004	NovaSeq	10	TRUE	GT	Octopus	alldifficult	AAaaaa	FP	69153	0.196583
HG002+HG003+HG004	NovaSeq	10	TRUE	GT	Octopus	alldifficult	AAAaaa	FN	97713	0.16416	0.126712
HG002+HG003+HG004	NovaSeq	10	TRUE	GT	Octopus	alldifficult	AAAaaa	FP	99119	0.281768
HG002+HG003+HG004	NovaSeq	10	TRUE	GT	Octopus	alldifficult	AAAAaa	FN	160872	0.270268	0.129893
HG002+HG003+HG004	NovaSeq	10	TRUE	GT	Octopus	alldifficult	AAAAaa	FP	91057	0.25885
HG002+HG003+HG004	NovaSeq	10	TRUE	GT	Octopus	alldifficult	AAAAAa	FN	212783	0.35748	0.199742
HG002+HG003+HG004	NovaSeq	10	TRUE	GT	Octopus	alldifficult	AAAAAa	FP	26158	0.07436
HG002+HG003+HG004	NovaSeq	10	TRUE	GT	GATK4	alldifficult	aaaaaa	FN	21210	0.0333624	0.0259575
HG002+HG003+HG004	NovaSeq	10	TRUE	GT	GATK4	alldifficult	aaaaaa	FP	30437	0.0822139
HG002+HG003+HG004	NovaSeq	10	TRUE	GT	GATK4	alldifficult	Aaaaaa	FN	47170	0.0741964	0.115018
HG002+HG003+HG004	NovaSeq	10	TRUE	GT	GATK4	alldifficult	Aaaaaa	FP	41854	0.113053
HG002+HG003+HG004	NovaSeq	10	TRUE	GT	GATK4	alldifficult	AAaaaa	FN	83841	0.131878	0.140755
HG002+HG003+HG004	NovaSeq	10	TRUE	GT	GATK4	alldifficult	AAaaaa	FP	63051	0.170308
HG002+HG003+HG004	NovaSeq	10	TRUE	GT	GATK4	alldifficult	AAAaaa	FN	110083	0.173156	0.142753
HG002+HG003+HG004	NovaSeq	10	TRUE	GT	GATK4	alldifficult	AAAaaa	FP	94244	0.254564
HG002+HG003+HG004	NovaSeq	10	TRUE	GT	GATK4	alldifficult	AAAAaa	FN	179505	0.282354	0.144938
HG002+HG003+HG004	NovaSeq	10	TRUE	GT	GATK4	alldifficult	AAAAaa	FP	86634	0.234009
HG002+HG003+HG004	NovaSeq	10	TRUE	GT	GATK4	alldifficult	AAAAAa	FN	193936	0.305053	0.18205
HG002+HG003+HG004	NovaSeq	10	TRUE	GT	GATK4	alldifficult	AAAAAa	FP	53997	0.145852
HG002+HG003+HG004	NovaSeq	10	TRUE	GT	FreeBayes	alldifficult	aaaaaa	FN	22889	0.0335624	0.0280123
HG002+HG003+HG004	NovaSeq	10	TRUE	GT	FreeBayes	alldifficult	aaaaaa	FP	27013	0.0824971
HG002+HG003+HG004	NovaSeq	10	TRUE	GT	FreeBayes	alldifficult	Aaaaaa	FN	66536	0.0975625	0.162239
HG002+HG003+HG004	NovaSeq	10	TRUE	GT	FreeBayes	alldifficult	Aaaaaa	FP	23959	0.0731702
HG002+HG003+HG004	NovaSeq	10	TRUE	GT	FreeBayes	alldifficult	AAaaaa	FN	81042	0.118833	0.136055
HG002+HG003+HG004	NovaSeq	10	TRUE	GT	FreeBayes	alldifficult	AAaaaa	FP	65455	0.199898
HG002+HG003+HG004	NovaSeq	10	TRUE	GT	FreeBayes	alldifficult	AAAaaa	FN	111847	0.164003	0.145041
HG002+HG003+HG004	NovaSeq	10	TRUE	GT	FreeBayes	alldifficult	AAAaaa	FP	90132	0.275261
HG002+HG003+HG004	NovaSeq	10	TRUE	GT	FreeBayes	alldifficult	AAAAaa	FN	189767	0.278258	0.153224
HG002+HG003+HG004	NovaSeq	10	TRUE	GT	FreeBayes	alldifficult	AAAAaa	FP	76170	0.232621
HG002+HG003+HG004	NovaSeq	10	TRUE	GT	FreeBayes	alldifficult	AAAAAa	FN	209902	0.307782	0.197038
HG002+HG003+HG004	NovaSeq	10	TRUE	GT	FreeBayes	alldifficult	AAAAAa	FP	44713	0.136552
HG002+HG003+HG004	NovaSeq	10	TRUE	GT	Octopus	alllowmapandsegdup	aaaaaa	FN	5982	0.0301681	0.00732096
HG002+HG003+HG004	NovaSeq	10	TRUE	GT	Octopus	alllowmapandsegdup	aaaaaa	FP	7477	0.0797904
HG002+HG003+HG004	NovaSeq	10	TRUE	GT	Octopus	alllowmapandsegdup	Aaaaaa	FN	15581	0.0785772	0.0379922
HG002+HG003+HG004	NovaSeq	10	TRUE	GT	Octopus	alllowmapandsegdup	Aaaaaa	FP	8290	0.0884663
HG002+HG003+HG004	NovaSeq	10	TRUE	GT	Octopus	alllowmapandsegdup	AAaaaa	FN	22957	0.115775	0.0385408
HG002+HG003+HG004	NovaSeq	10	TRUE	GT	Octopus	alllowmapandsegdup	AAaaaa	FP	18154	0.193729
HG002+HG003+HG004	NovaSeq	10	TRUE	GT	Octopus	alllowmapandsegdup	AAAaaa	FN	31905	0.160902	0.0413736
HG002+HG003+HG004	NovaSeq	10	TRUE	GT	Octopus	alllowmapandsegdup	AAAaaa	FP	26869	0.286731
HG002+HG003+HG004	NovaSeq	10	TRUE	GT	Octopus	alllowmapandsegdup	AAAAaa	FN	50377	0.254058	0.0406759
HG002+HG003+HG004	NovaSeq	10	TRUE	GT	Octopus	alllowmapandsegdup	AAAAaa	FP	26478	0.282559
HG002+HG003+HG004	NovaSeq	10	TRUE	GT	Octopus	alllowmapandsegdup	AAAAAa	FN	71487	0.360519	0.0671059
HG002+HG003+HG004	NovaSeq	10	TRUE	GT	Octopus	alllowmapandsegdup	AAAAAa	FP	6440	0.0687241
HG002+HG003+HG004	NovaSeq	10	TRUE	GT	GATK4	alllowmapandsegdup	aaaaaa	FN	15707	0.0732869	0.0192227
HG002+HG003+HG004	NovaSeq	10	TRUE	GT	GATK4	alllowmapandsegdup	aaaaaa	FP	5738	0.054154
HG002+HG003+HG004	NovaSeq	10	TRUE	GT	GATK4	alllowmapandsegdup	Aaaaaa	FN	17409	0.0812282	0.0424496
HG002+HG003+HG004	NovaSeq	10	TRUE	GT	GATK4	alllowmapandsegdup	Aaaaaa	FP	9761	0.0921223
HG002+HG003+HG004	NovaSeq	10	TRUE	GT	GATK4	alllowmapandsegdup	AAaaaa	FN	27484	0.128237	0.0461409
HG002+HG003+HG004	NovaSeq	10	TRUE	GT	GATK4	alllowmapandsegdup	AAaaaa	FP	16132	0.15225
HG002+HG003+HG004	NovaSeq	10	TRUE	GT	GATK4	alllowmapandsegdup	AAAaaa	FN	36335	0.169535	0.0471184
HG002+HG003+HG004	NovaSeq	10	TRUE	GT	GATK4	alllowmapandsegdup	AAAaaa	FP	25262	0.238417
HG002+HG003+HG004	NovaSeq	10	TRUE	GT	GATK4	alllowmapandsegdup	AAAAaa	FN	55215	0.257626	0.0445822
HG002+HG003+HG004	NovaSeq	10	TRUE	GT	GATK4	alllowmapandsegdup	AAAAaa	FP	27574	0.260238
HG002+HG003+HG004	NovaSeq	10	TRUE	GT	GATK4	alllowmapandsegdup	AAAAAa	FN	62172	0.290087	0.0583617
HG002+HG003+HG004	NovaSeq	10	TRUE	GT	GATK4	alllowmapandsegdup	AAAAAa	FP	21490	0.202818
HG002+HG003+HG004	NovaSeq	10	TRUE	GT	FreeBayes	alllowmapandsegdup	aaaaaa	FN	9251	0.0424356	0.0113217
HG002+HG003+HG004	NovaSeq	10	TRUE	GT	FreeBayes	alllowmapandsegdup	aaaaaa	FP	5906	0.0601524
HG002+HG003+HG004	NovaSeq	10	TRUE	GT	FreeBayes	alllowmapandsegdup	Aaaaaa	FN	22412	0.102807	0.0546488
HG002+HG003+HG004	NovaSeq	10	TRUE	GT	FreeBayes	alllowmapandsegdup	Aaaaaa	FP	6261	0.063768
HG002+HG003+HG004	NovaSeq	10	TRUE	GT	FreeBayes	alllowmapandsegdup	AAaaaa	FN	26007	0.119298	0.0436613
HG002+HG003+HG004	NovaSeq	10	TRUE	GT	FreeBayes	alllowmapandsegdup	AAaaaa	FP	18015	0.183482
HG002+HG003+HG004	NovaSeq	10	TRUE	GT	FreeBayes	alllowmapandsegdup	AAAaaa	FN	35601	0.163307	0.0461665
HG002+HG003+HG004	NovaSeq	10	TRUE	GT	FreeBayes	alllowmapandsegdup	AAAaaa	FP	26355	0.268425
HG002+HG003+HG004	NovaSeq	10	TRUE	GT	FreeBayes	alllowmapandsegdup	AAAAaa	FN	56781	0.260462	0.0458467
HG002+HG003+HG004	NovaSeq	10	TRUE	GT	FreeBayes	alllowmapandsegdup	AAAAaa	FP	25766	0.262426
HG002+HG003+HG004	NovaSeq	10	TRUE	GT	FreeBayes	alllowmapandsegdup	AAAAAa	FN	67949	0.311691	0.0637847
HG002+HG003+HG004	NovaSeq	10	TRUE	GT	FreeBayes	alllowmapandsegdup	AAAAAa	FP	15881	0.161747
HG002+HG003+HG004	NovaSeq	10	TRUE	GT	Octopus	notinalldifficult	aaaaaa	FN	5229	0.00270239	0.00639941
HG002+HG003+HG004	NovaSeq	10	TRUE	GT	Octopus	notinalldifficult	aaaaaa	FP	74314	0.0640131
HG002+HG003+HG004	NovaSeq	10	TRUE	GT	Octopus	notinalldifficult	Aaaaaa	FN	132455	0.0684538	0.322974
HG002+HG003+HG004	NovaSeq	10	TRUE	GT	Octopus	notinalldifficult	Aaaaaa	FP	121941	0.105038
HG002+HG003+HG004	NovaSeq	10	TRUE	GT	Octopus	notinalldifficult	AAaaaa	FN	236337	0.122141	0.396769
HG002+HG003+HG004	NovaSeq	10	TRUE	GT	Octopus	notinalldifficult	AAaaaa	FP	239520	0.206319
HG002+HG003+HG004	NovaSeq	10	TRUE	GT	Octopus	notinalldifficult	AAAaaa	FN	321094	0.165944	0.416387
HG002+HG003+HG004	NovaSeq	10	TRUE	GT	Octopus	notinalldifficult	AAAaaa	FP	346491	0.298463
HG002+HG003+HG004	NovaSeq	10	TRUE	GT	Octopus	notinalldifficult	AAAAaa	FN	528069	0.27291	0.426379
HG002+HG003+HG004	NovaSeq	10	TRUE	GT	Octopus	notinalldifficult	AAAAaa	FP	305113	0.26282
HG002+HG003+HG004	NovaSeq	10	TRUE	GT	Octopus	notinalldifficult	AAAAAa	FN	711772	0.367849	0.66815
HG002+HG003+HG004	NovaSeq	10	TRUE	GT	Octopus	notinalldifficult	AAAAAa	FP	73539	0.0633456
HG002+HG003+HG004	NovaSeq	10	TRUE	GT	GATK4	notinalldifficult	aaaaaa	FN	14513	0.00730098	0.0177615
HG002+HG003+HG004	NovaSeq	10	TRUE	GT	GATK4	notinalldifficult	aaaaaa	FP	74898	0.0561843
HG002+HG003+HG004	NovaSeq	10	TRUE	GT	GATK4	notinalldifficult	Aaaaaa	FN	142111	0.0714911	0.346519
HG002+HG003+HG004	NovaSeq	10	TRUE	GT	GATK4	notinalldifficult	Aaaaaa	FP	153184	0.11491
HG002+HG003+HG004	NovaSeq	10	TRUE	GT	GATK4	notinalldifficult	AAaaaa	FN	288221	0.144994	0.483873
HG002+HG003+HG004	NovaSeq	10	TRUE	GT	GATK4	notinalldifficult	AAaaaa	FP	227998	0.171031
HG002+HG003+HG004	NovaSeq	10	TRUE	GT	GATK4	notinalldifficult	AAAaaa	FN	366759	0.184504	0.475604
HG002+HG003+HG004	NovaSeq	10	TRUE	GT	GATK4	notinalldifficult	AAAaaa	FP	349100	0.261875
HG002+HG003+HG004	NovaSeq	10	TRUE	GT	GATK4	notinalldifficult	AAAAaa	FN	591525	0.297575	0.477615
HG002+HG003+HG004	NovaSeq	10	TRUE	GT	GATK4	notinalldifficult	AAAAaa	FP	314517	0.235933
HG002+HG003+HG004	NovaSeq	10	TRUE	GT	GATK4	notinalldifficult	AAAAAa	FN	584686	0.294135	0.548853
HG002+HG003+HG004	NovaSeq	10	TRUE	GT	GATK4	notinalldifficult	AAAAAa	FP	213380	0.160066
HG002+HG003+HG004	NovaSeq	10	TRUE	GT	FreeBayes	notinalldifficult	aaaaaa	FN	20113	0.00925608	0.0246149
HG002+HG003+HG004	NovaSeq	10	TRUE	GT	FreeBayes	notinalldifficult	aaaaaa	FP	70782	0.0563234
HG002+HG003+HG004	NovaSeq	10	TRUE	GT	FreeBayes	notinalldifficult	Aaaaaa	FN	211711	0.0974302	0.51623
HG002+HG003+HG004	NovaSeq	10	TRUE	GT	FreeBayes	notinalldifficult	Aaaaaa	FP	104222	0.0829327
HG002+HG003+HG004	NovaSeq	10	TRUE	GT	FreeBayes	notinalldifficult	AAaaaa	FN	276146	0.127083	0.463601
HG002+HG003+HG004	NovaSeq	10	TRUE	GT	FreeBayes	notinalldifficult	AAaaaa	FP	250208	0.199098
HG002+HG003+HG004	NovaSeq	10	TRUE	GT	FreeBayes	notinalldifficult	AAAaaa	FN	369645	0.170112	0.479347
HG002+HG003+HG004	NovaSeq	10	TRUE	GT	FreeBayes	notinalldifficult	AAAaaa	FP	352044	0.280132
HG002+HG003+HG004	NovaSeq	10	TRUE	GT	FreeBayes	notinalldifficult	AAAAaa	FN	628356	0.289172	0.507353
HG002+HG003+HG004	NovaSeq	10	TRUE	GT	FreeBayes	notinalldifficult	AAAAaa	FP	282790	0.225025
HG002+HG003+HG004	NovaSeq	10	TRUE	GT	FreeBayes	notinalldifficult	AAAAAa	FN	666980	0.306947	0.626104
HG002+HG003+HG004	NovaSeq	10	TRUE	GT	FreeBayes	notinalldifficult	AAAAAa	FP	196660	0.156488
HG002+HG003+HG004	NovaSeq	10	TRUE	GT	Octopus	notinalllowmapandsegdup	aaaaaa	FN	8718	0.00373917	0.0106694
HG002+HG003+HG004	NovaSeq	10	TRUE	GT	Octopus	notinalllowmapandsegdup	aaaaaa	FP	98366	0.0693267
HG002+HG003+HG004	NovaSeq	10	TRUE	GT	Octopus	notinalllowmapandsegdup	Aaaaaa	FN	160776	0.0689572	0.392031
HG002+HG003+HG004	NovaSeq	10	TRUE	GT	Octopus	notinalllowmapandsegdup	Aaaaaa	FP	148419	0.104603
HG002+HG003+HG004	NovaSeq	10	TRUE	GT	Octopus	notinalllowmapandsegdup	AAaaaa	FN	283842	0.121741	0.476522
HG002+HG003+HG004	NovaSeq	10	TRUE	GT	Octopus	notinalllowmapandsegdup	AAaaaa	FP	290496	0.204737
HG002+HG003+HG004	NovaSeq	10	TRUE	GT	Octopus	notinalllowmapandsegdup	AAAaaa	FN	386847	0.16592	0.501654
HG002+HG003+HG004	NovaSeq	10	TRUE	GT	Octopus	notinalllowmapandsegdup	AAAaaa	FP	418709	0.295099
HG002+HG003+HG004	NovaSeq	10	TRUE	GT	Octopus	notinalllowmapandsegdup	AAAAaa	FN	638445	0.273831	0.515499
HG002+HG003+HG004	NovaSeq	10	TRUE	GT	Octopus	notinalllowmapandsegdup	AAAAaa	FP	369643	0.260518
HG002+HG003+HG004	NovaSeq	10	TRUE	GT	Octopus	notinalllowmapandsegdup	AAAAAa	FN	852904	0.365813	0.800633
HG002+HG003+HG004	NovaSeq	10	TRUE	GT	Octopus	notinalllowmapandsegdup	AAAAAa	FP	93243	0.0657161
HG002+HG003+HG004	NovaSeq	10	TRUE	GT	GATK4	notinalllowmapandsegdup	aaaaaa	FN	20013	0.00830804	0.0244925
HG002+HG003+HG004	NovaSeq	10	TRUE	GT	GATK4	notinalllowmapandsegdup	aaaaaa	FP	99592	0.0623578
HG002+HG003+HG004	NovaSeq	10	TRUE	GT	GATK4	notinalllowmapandsegdup	Aaaaaa	FN	171863	0.0713459	0.419066
HG002+HG003+HG004	NovaSeq	10	TRUE	GT	GATK4	notinalllowmapandsegdup	Aaaaaa	FP	185262	0.115998
HG002+HG003+HG004	NovaSeq	10	TRUE	GT	GATK4	notinalllowmapandsegdup	AAaaaa	FN	344552	0.143035	0.578443
HG002+HG003+HG004	NovaSeq	10	TRUE	GT	GATK4	notinalllowmapandsegdup	AAaaaa	FP	274881	0.172112
HG002+HG003+HG004	NovaSeq	10	TRUE	GT	GATK4	notinalllowmapandsegdup	AAAaaa	FN	440444	0.182843	0.571157
HG002+HG003+HG004	NovaSeq	10	TRUE	GT	GATK4	notinalllowmapandsegdup	AAAaaa	FP	418035	0.261745
HG002+HG003+HG004	NovaSeq	10	TRUE	GT	GATK4	notinalllowmapandsegdup	AAAAaa	FN	715696	0.297108	0.577874
HG002+HG003+HG004	NovaSeq	10	TRUE	GT	GATK4	notinalllowmapandsegdup	AAAAaa	FP	373513	0.233868
HG002+HG003+HG004	NovaSeq	10	TRUE	GT	GATK4	notinalllowmapandsegdup	AAAAAa	FN	716303	0.29736	0.672404
HG002+HG003+HG004	NovaSeq	10	TRUE	GT	GATK4	notinalllowmapandsegdup	AAAAAa	FP	245824	0.153918
HG002+HG003+HG004	NovaSeq	10	TRUE	GT	FreeBayes	notinalllowmapandsegdup	aaaaaa	FN	33754	0.0128029	0.0413092
HG002+HG003+HG004	NovaSeq	10	TRUE	GT	FreeBayes	notinalllowmapandsegdup	aaaaaa	FP	88155	0.060226
HG002+HG003+HG004	NovaSeq	10	TRUE	GT	FreeBayes	notinalllowmapandsegdup	Aaaaaa	FN	255821	0.0970331	0.623786
HG002+HG003+HG004	NovaSeq	10	TRUE	GT	FreeBayes	notinalllowmapandsegdup	Aaaaaa	FP	120344	0.082217
HG002+HG003+HG004	NovaSeq	10	TRUE	GT	FreeBayes	notinalllowmapandsegdup	AAaaaa	FN	331149	0.125605	0.555942
HG002+HG003+HG004	NovaSeq	10	TRUE	GT	FreeBayes	notinalllowmapandsegdup	AAaaaa	FP	292602	0.199901
HG002+HG003+HG004	NovaSeq	10	TRUE	GT	FreeBayes	notinalllowmapandsegdup	AAAaaa	FN	445809	0.169096	0.578115
HG002+HG003+HG004	NovaSeq	10	TRUE	GT	FreeBayes	notinalllowmapandsegdup	AAAaaa	FP	409805	0.279972
HG002+HG003+HG004	NovaSeq	10	TRUE	GT	FreeBayes	notinalllowmapandsegdup	AAAAaa	FN	761170	0.288712	0.614591
HG002+HG003+HG004	NovaSeq	10	TRUE	GT	FreeBayes	notinalllowmapandsegdup	AAAAaa	FP	328765	0.224607
HG002+HG003+HG004	NovaSeq	10	TRUE	GT	FreeBayes	notinalllowmapandsegdup	AAAAAa	FN	808726	0.306751	0.759163
HG002+HG003+HG004	NovaSeq	10	TRUE	GT	FreeBayes	notinalllowmapandsegdup	AAAAAa	FP	224066	0.153078
HG002+HG003+HG004	NovaSeq	10	TRUE	GT	Octopus	AllTandemRepeatsandHomopolymers	aaaaaa	FN	3141	0.0119924	0.00384405
HG002+HG003+HG004	NovaSeq	10	TRUE	GT	Octopus	AllTandemRepeatsandHomopolymers	aaaaaa	FP	18965	0.106639
HG002+HG003+HG004	NovaSeq	10	TRUE	GT	Octopus	AllTandemRepeatsandHomopolymers	Aaaaaa	FN	19096	0.0729091	0.0465631
HG002+HG003+HG004	NovaSeq	10	TRUE	GT	Octopus	AllTandemRepeatsandHomopolymers	Aaaaaa	FP	18093	0.101736
HG002+HG003+HG004	NovaSeq	10	TRUE	GT	Octopus	AllTandemRepeatsandHomopolymers	AAaaaa	FN	30616	0.116893	0.051399
HG002+HG003+HG004	NovaSeq	10	TRUE	GT	Octopus	AllTandemRepeatsandHomopolymers	AAaaaa	FP	34616	0.194644
HG002+HG003+HG004	NovaSeq	10	TRUE	GT	Octopus	AllTandemRepeatsandHomopolymers	AAAaaa	FN	43700	0.166848	0.0566691
HG002+HG003+HG004	NovaSeq	10	TRUE	GT	Octopus	AllTandemRepeatsandHomopolymers	AAAaaa	FP	48359	0.27192
HG002+HG003+HG004	NovaSeq	10	TRUE	GT	Octopus	AllTandemRepeatsandHomopolymers	AAAAaa	FN	72997	0.278705	0.0589399
HG002+HG003+HG004	NovaSeq	10	TRUE	GT	Octopus	AllTandemRepeatsandHomopolymers	AAAAaa	FP	43504	0.24462
HG002+HG003+HG004	NovaSeq	10	TRUE	GT	Octopus	AllTandemRepeatsandHomopolymers	AAAAAa	FN	92365	0.352653	0.0867043
HG002+HG003+HG004	NovaSeq	10	TRUE	GT	Octopus	AllTandemRepeatsandHomopolymers	AAAAAa	FP	14306	0.0804417
HG002+HG003+HG004	NovaSeq	10	TRUE	GT	GATK4	AllTandemRepeatsandHomopolymers	aaaaaa	FN	4548	0.016108	0.00556599
HG002+HG003+HG004	NovaSeq	10	TRUE	GT	GATK4	AllTandemRepeatsandHomopolymers	aaaaaa	FP	19592	0.114675
HG002+HG003+HG004	NovaSeq	10	TRUE	GT	GATK4	AllTandemRepeatsandHomopolymers	Aaaaaa	FN	19752	0.0699572	0.0481627
HG002+HG003+HG004	NovaSeq	10	TRUE	GT	GATK4	AllTandemRepeatsandHomopolymers	Aaaaaa	FP	21804	0.127622
HG002+HG003+HG004	NovaSeq	10	TRUE	GT	GATK4	AllTandemRepeatsandHomopolymers	AAaaaa	FN	35990	0.127469	0.060421
HG002+HG003+HG004	NovaSeq	10	TRUE	GT	GATK4	AllTandemRepeatsandHomopolymers	AAaaaa	FP	31086	0.181951
HG002+HG003+HG004	NovaSeq	10	TRUE	GT	GATK4	AllTandemRepeatsandHomopolymers	AAAaaa	FN	48337	0.171199	0.0626823
HG002+HG003+HG004	NovaSeq	10	TRUE	GT	GATK4	AllTandemRepeatsandHomopolymers	AAAaaa	FP	44544	0.260723
HG002+HG003+HG004	NovaSeq	10	TRUE	GT	GATK4	AllTandemRepeatsandHomopolymers	AAAAaa	FN	82344	0.291644	0.066487
HG002+HG003+HG004	NovaSeq	10	TRUE	GT	GATK4	AllTandemRepeatsandHomopolymers	AAAAaa	FP	36879	0.215859
HG002+HG003+HG004	NovaSeq	10	TRUE	GT	GATK4	AllTandemRepeatsandHomopolymers	AAAAAa	FN	91373	0.323623	0.0857731
HG002+HG003+HG004	NovaSeq	10	TRUE	GT	GATK4	AllTandemRepeatsandHomopolymers	AAAAAa	FP	16943	0.09917
HG002+HG003+HG004	NovaSeq	10	TRUE	GT	FreeBayes	AllTandemRepeatsandHomopolymers	aaaaaa	FN	11895	0.0381312	0.0145575
HG002+HG003+HG004	NovaSeq	10	TRUE	GT	FreeBayes	AllTandemRepeatsandHomopolymers	aaaaaa	FP	16733	0.116399
HG002+HG003+HG004	NovaSeq	10	TRUE	GT	FreeBayes	AllTandemRepeatsandHomopolymers	Aaaaaa	FN	29069	0.0931851	0.070881
HG002+HG003+HG004	NovaSeq	10	TRUE	GT	FreeBayes	AllTandemRepeatsandHomopolymers	Aaaaaa	FP	10698	0.0744183
HG002+HG003+HG004	NovaSeq	10	TRUE	GT	FreeBayes	AllTandemRepeatsandHomopolymers	AAaaaa	FN	35602	0.114128	0.0597696
HG002+HG003+HG004	NovaSeq	10	TRUE	GT	FreeBayes	AllTandemRepeatsandHomopolymers	AAaaaa	FP	30509	0.212229
HG002+HG003+HG004	NovaSeq	10	TRUE	GT	FreeBayes	AllTandemRepeatsandHomopolymers	AAAaaa	FN	50727	0.162613	0.0657816
HG002+HG003+HG004	NovaSeq	10	TRUE	GT	FreeBayes	AllTandemRepeatsandHomopolymers	AAAaaa	FP	39731	0.27638
HG002+HG003+HG004	NovaSeq	10	TRUE	GT	FreeBayes	AllTandemRepeatsandHomopolymers	AAAAaa	FN	88639	0.284146	0.0715698
HG002+HG003+HG004	NovaSeq	10	TRUE	GT	FreeBayes	AllTandemRepeatsandHomopolymers	AAAAaa	FP	30874	0.214768
HG002+HG003+HG004	NovaSeq	10	TRUE	GT	FreeBayes	AllTandemRepeatsandHomopolymers	AAAAAa	FN	96017	0.307797	0.0901325
HG002+HG003+HG004	NovaSeq	10	TRUE	GT	FreeBayes	AllTandemRepeatsandHomopolymers	AAAAAa	FP	15210	0.105805
HG002+HG003+HG004	NovaSeq	10	TRUE	GT	Octopus	notinAllTandemRepeatsandHomopolymers	aaaaaa	FN	11559	0.00509575	0.0141463
HG002+HG003+HG004	NovaSeq	10	TRUE	GT	Octopus	notinAllTandemRepeatsandHomopolymers	aaaaaa	FP	86886	0.0650883
HG002+HG003+HG004	NovaSeq	10	TRUE	GT	Octopus	notinAllTandemRepeatsandHomopolymers	Aaaaaa	FN	157274	0.0693338	0.383492
HG002+HG003+HG004	NovaSeq	10	TRUE	GT	Octopus	notinAllTandemRepeatsandHomopolymers	Aaaaaa	FP	138612	0.103837
HG002+HG003+HG004	NovaSeq	10	TRUE	GT	Octopus	notinAllTandemRepeatsandHomopolymers	AAaaaa	FN	276218	0.12177	0.463722
HG002+HG003+HG004	NovaSeq	10	TRUE	GT	Octopus	notinAllTandemRepeatsandHomopolymers	AAaaaa	FP	274062	0.205306
HG002+HG003+HG004	NovaSeq	10	TRUE	GT	Octopus	notinAllTandemRepeatsandHomopolymers	AAAaaa	FN	375119	0.16537	0.486445
HG002+HG003+HG004	NovaSeq	10	TRUE	GT	Octopus	notinAllTandemRepeatsandHomopolymers	AAAaaa	FP	397266	0.297601
HG002+HG003+HG004	NovaSeq	10	TRUE	GT	Octopus	notinAllTandemRepeatsandHomopolymers	AAAAaa	FN	615973	0.27155	0.497355
HG002+HG003+HG004	NovaSeq	10	TRUE	GT	Octopus	notinAllTandemRepeatsandHomopolymers	AAAAaa	FP	352677	0.264199
HG002+HG003+HG004	NovaSeq	10	TRUE	GT	Octopus	notinAllTandemRepeatsandHomopolymers	AAAAAa	FN	832216	0.36688	0.781213
HG002+HG003+HG004	NovaSeq	10	TRUE	GT	Octopus	notinAllTandemRepeatsandHomopolymers	AAAAAa	FP	85391	0.0639684
HG002+HG003+HG004	NovaSeq	10	TRUE	GT	GATK4	notinAllTandemRepeatsandHomopolymers	aaaaaa	FN	31179	0.0133168	0.0381578
HG002+HG003+HG004	NovaSeq	10	TRUE	GT	GATK4	notinAllTandemRepeatsandHomopolymers	aaaaaa	FP	85749	0.0559533
HG002+HG003+HG004	NovaSeq	10	TRUE	GT	GATK4	notinAllTandemRepeatsandHomopolymers	Aaaaaa	FN	169538	0.0724111	0.413396
HG002+HG003+HG004	NovaSeq	10	TRUE	GT	GATK4	notinAllTandemRepeatsandHomopolymers	Aaaaaa	FP	173235	0.11304
HG002+HG003+HG004	NovaSeq	10	TRUE	GT	GATK4	notinAllTandemRepeatsandHomopolymers	AAaaaa	FN	336083	0.143544	0.564225
HG002+HG003+HG004	NovaSeq	10	TRUE	GT	GATK4	notinAllTandemRepeatsandHomopolymers	AAaaaa	FP	259982	0.169645
HG002+HG003+HG004	NovaSeq	10	TRUE	GT	GATK4	notinAllTandemRepeatsandHomopolymers	AAAaaa	FN	428518	0.183024	0.555692
HG002+HG003+HG004	NovaSeq	10	TRUE	GT	GATK4	notinAllTandemRepeatsandHomopolymers	AAAaaa	FP	398804	0.260229
HG002+HG003+HG004	NovaSeq	10	TRUE	GT	GATK4	notinAllTandemRepeatsandHomopolymers	AAAAaa	FN	688733	0.294164	0.556103
HG002+HG003+HG004	NovaSeq	10	TRUE	GT	GATK4	notinAllTandemRepeatsandHomopolymers	AAAAaa	FP	364291	0.237709
HG002+HG003+HG004	NovaSeq	10	TRUE	GT	GATK4	notinAllTandemRepeatsandHomopolymers	AAAAAa	FN	687275	0.293541	0.645155
HG002+HG003+HG004	NovaSeq	10	TRUE	GT	GATK4	notinAllTandemRepeatsandHomopolymers	AAAAAa	FP	250448	0.163424
HG002+HG003+HG004	NovaSeq	10	TRUE	GT	FreeBayes	notinAllTandemRepeatsandHomopolymers	aaaaaa	FN	31112	0.0122339	0.0380758
HG002+HG003+HG004	NovaSeq	10	TRUE	GT	FreeBayes	notinAllTandemRepeatsandHomopolymers	aaaaaa	FP	81413	0.0564427
HG002+HG003+HG004	NovaSeq	10	TRUE	GT	FreeBayes	notinAllTandemRepeatsandHomopolymers	Aaaaaa	FN	249186	0.0979853	0.607608
HG002+HG003+HG004	NovaSeq	10	TRUE	GT	FreeBayes	notinAllTandemRepeatsandHomopolymers	Aaaaaa	FP	117633	0.0815536
HG002+HG003+HG004	NovaSeq	10	TRUE	GT	FreeBayes	notinAllTandemRepeatsandHomopolymers	AAaaaa	FN	321603	0.126461	0.539916
HG002+HG003+HG004	NovaSeq	10	TRUE	GT	FreeBayes	notinAllTandemRepeatsandHomopolymers	AAaaaa	FP	285625	0.198021
HG002+HG003+HG004	NovaSeq	10	TRUE	GT	FreeBayes	notinAllTandemRepeatsandHomopolymers	AAAaaa	FN	430779	0.169391	0.558624
HG002+HG003+HG004	NovaSeq	10	TRUE	GT	FreeBayes	notinAllTandemRepeatsandHomopolymers	AAAaaa	FP	402966	0.279372
HG002+HG003+HG004	NovaSeq	10	TRUE	GT	FreeBayes	notinAllTandemRepeatsandHomopolymers	AAAAaa	FN	729528	0.286866	0.589043
HG002+HG003+HG004	NovaSeq	10	TRUE	GT	FreeBayes	notinAllTandemRepeatsandHomopolymers	AAAAaa	FP	328481	0.227732
HG002+HG003+HG004	NovaSeq	10	TRUE	GT	FreeBayes	notinAllTandemRepeatsandHomopolymers	AAAAAa	FN	780889	0.307062	0.733032
HG002+HG003+HG004	NovaSeq	10	TRUE	GT	FreeBayes	notinAllTandemRepeatsandHomopolymers	AAAAAa	FP	226283	0.156879
HG002+HG003+HG004	NovaSeq	20	TRUE	GT	Octopus	genome	aaaaaa	FN	17515	0.0114082	0.0214354
HG002+HG003+HG004	NovaSeq	20	TRUE	GT	Octopus	genome	aaaaaa	FP	19025	0.0165676
HG002+HG003+HG004	NovaSeq	20	TRUE	GT	Octopus	genome	Aaaaaa	FN	81048	0.0527895	0.197625
HG002+HG003+HG004	NovaSeq	20	TRUE	GT	Octopus	genome	Aaaaaa	FP	107666	0.0937588
HG002+HG003+HG004	NovaSeq	20	TRUE	GT	Octopus	genome	AAaaaa	FN	205332	0.13374	0.344717
HG002+HG003+HG004	NovaSeq	20	TRUE	GT	Octopus	genome	AAaaaa	FP	202841	0.17664
HG002+HG003+HG004	NovaSeq	20	TRUE	GT	Octopus	genome	AAAaaa	FN	287594	0.187321	0.372945
HG002+HG003+HG004	NovaSeq	20	TRUE	GT	Octopus	genome	AAAaaa	FP	325714	0.283642
HG002+HG003+HG004	NovaSeq	20	TRUE	GT	Octopus	genome	AAAAaa	FN	439620	0.286341	0.354962
HG002+HG003+HG004	NovaSeq	20	TRUE	GT	Octopus	genome	AAAAaa	FP	306328	0.26676
HG002+HG003+HG004	NovaSeq	20	TRUE	GT	Octopus	genome	AAAAAa	FN	504195	0.328401	0.473295
HG002+HG003+HG004	NovaSeq	20	TRUE	GT	Octopus	genome	AAAAAa	FP	186755	0.162632
HG002+HG003+HG004	NovaSeq	20	TRUE	GT	GATK4	genome	aaaaaa	FN	30802	0.0171629	0.0376965
HG002+HG003+HG004	NovaSeq	20	TRUE	GT	GATK4	genome	aaaaaa	FP	18258	0.0129828
HG002+HG003+HG004	NovaSeq	20	TRUE	GT	GATK4	genome	Aaaaaa	FN	104228	0.0580758	0.254146
HG002+HG003+HG004	NovaSeq	20	TRUE	GT	GATK4	genome	Aaaaaa	FP	133399	0.0948566
HG002+HG003+HG004	NovaSeq	20	TRUE	GT	GATK4	genome	AAaaaa	FN	266667	0.148587	0.447688
HG002+HG003+HG004	NovaSeq	20	TRUE	GT	GATK4	genome	AAaaaa	FP	241468	0.171702
HG002+HG003+HG004	NovaSeq	20	TRUE	GT	GATK4	genome	AAAaaa	FN	366553	0.204243	0.475337
HG002+HG003+HG004	NovaSeq	20	TRUE	GT	GATK4	genome	AAAaaa	FP	372690	0.26501
HG002+HG003+HG004	NovaSeq	20	TRUE	GT	GATK4	genome	AAAAaa	FN	547357	0.304987	0.441952
HG002+HG003+HG004	NovaSeq	20	TRUE	GT	GATK4	genome	AAAAaa	FP	358812	0.255142
HG002+HG003+HG004	NovaSeq	20	TRUE	GT	GATK4	genome	AAAAAa	FN	479081	0.266944	0.44972
HG002+HG003+HG004	NovaSeq	20	TRUE	GT	GATK4	genome	AAAAAa	FP	281696	0.200307
HG002+HG003+HG004	NovaSeq	20	TRUE	GT	FreeBayes	genome	aaaaaa	FN	45390	0.0236716	0.0555497
HG002+HG003+HG004	NovaSeq	20	TRUE	GT	FreeBayes	genome	aaaaaa	FP	17152	0.0118151
HG002+HG003+HG004	NovaSeq	20	TRUE	GT	FreeBayes	genome	Aaaaaa	FN	155605	0.0811503	0.379423
HG002+HG003+HG004	NovaSeq	20	TRUE	GT	FreeBayes	genome	Aaaaaa	FP	120567	0.0830519
HG002+HG003+HG004	NovaSeq	20	TRUE	GT	FreeBayes	genome	AAaaaa	FN	265541	0.138484	0.445797
HG002+HG003+HG004	NovaSeq	20	TRUE	GT	FreeBayes	genome	AAaaaa	FP	244658	0.168531
HG002+HG003+HG004	NovaSeq	20	TRUE	GT	FreeBayes	genome	AAAaaa	FN	364645	0.190168	0.472863
HG002+HG003+HG004	NovaSeq	20	TRUE	GT	FreeBayes	genome	AAAaaa	FP	376576	0.259402
HG002+HG003+HG004	NovaSeq	20	TRUE	GT	FreeBayes	genome	AAAAaa	FN	560765	0.292447	0.452778
HG002+HG003+HG004	NovaSeq	20	TRUE	GT	FreeBayes	genome	AAAAaa	FP	348244	0.239886
HG002+HG003+HG004	NovaSeq	20	TRUE	GT	FreeBayes	genome	AAAAAa	FN	525545	0.27408	0.493337
HG002+HG003+HG004	NovaSeq	20	TRUE	GT	FreeBayes	genome	AAAAAa	FP	344509	0.237313
HG002+HG003+HG004	NovaSeq	20	TRUE	GT	Octopus	alldifficult	aaaaaa	FN	8953	0.0235397	0.010957
HG002+HG003+HG004	NovaSeq	20	TRUE	GT	Octopus	alldifficult	aaaaaa	FP	7515	0.0264527
HG002+HG003+HG004	NovaSeq	20	TRUE	GT	Octopus	alldifficult	Aaaaaa	FN	23104	0.0607463	0.0563361
HG002+HG003+HG004	NovaSeq	20	TRUE	GT	Octopus	alldifficult	Aaaaaa	FP	25023	0.0880806
HG002+HG003+HG004	NovaSeq	20	TRUE	GT	Octopus	alldifficult	AAaaaa	FN	49777	0.130876	0.083567
HG002+HG003+HG004	NovaSeq	20	TRUE	GT	Octopus	alldifficult	AAaaaa	FP	47368	0.166735
HG002+HG003+HG004	NovaSeq	20	TRUE	GT	Octopus	alldifficult	AAAaaa	FN	69377	0.18241	0.0899665
HG002+HG003+HG004	NovaSeq	20	TRUE	GT	Octopus	alldifficult	AAAaaa	FP	75996	0.267505
HG002+HG003+HG004	NovaSeq	20	TRUE	GT	Octopus	alldifficult	AAAAaa	FN	105622	0.277707	0.0852823
HG002+HG003+HG004	NovaSeq	20	TRUE	GT	Octopus	alldifficult	AAAAaa	FP	77678	0.273426
HG002+HG003+HG004	NovaSeq	20	TRUE	GT	Octopus	alldifficult	AAAAAa	FN	123503	0.324721	0.115934
HG002+HG003+HG004	NovaSeq	20	TRUE	GT	Octopus	alldifficult	AAAAAa	FP	50512	0.177802
HG002+HG003+HG004	NovaSeq	20	TRUE	GT	GATK4	alldifficult	aaaaaa	FN	20344	0.0442294	0.0248976
HG002+HG003+HG004	NovaSeq	20	TRUE	GT	GATK4	alldifficult	aaaaaa	FP	6591	0.0203968
HG002+HG003+HG004	NovaSeq	20	TRUE	GT	GATK4	alldifficult	Aaaaaa	FN	28681	0.0623546	0.0699349
HG002+HG003+HG004	NovaSeq	20	TRUE	GT	GATK4	alldifficult	Aaaaaa	FP	30613	0.0947363
HG002+HG003+HG004	NovaSeq	20	TRUE	GT	GATK4	alldifficult	AAaaaa	FN	63221	0.137447	0.106137
HG002+HG003+HG004	NovaSeq	20	TRUE	GT	GATK4	alldifficult	AAaaaa	FP	52258	0.16172
HG002+HG003+HG004	NovaSeq	20	TRUE	GT	GATK4	alldifficult	AAAaaa	FN	86879	0.188881	0.112663
HG002+HG003+HG004	NovaSeq	20	TRUE	GT	GATK4	alldifficult	AAAaaa	FP	80851	0.250205
HG002+HG003+HG004	NovaSeq	20	TRUE	GT	GATK4	alldifficult	AAAAaa	FN	131167	0.285167	0.105908
HG002+HG003+HG004	NovaSeq	20	TRUE	GT	GATK4	alldifficult	AAAAaa	FP	82265	0.254581
HG002+HG003+HG004	NovaSeq	20	TRUE	GT	GATK4	alldifficult	AAAAAa	FN	129674	0.281921	0.121727
HG002+HG003+HG004	NovaSeq	20	TRUE	GT	GATK4	alldifficult	AAAAAa	FP	70561	0.218361
HG002+HG003+HG004	NovaSeq	20	TRUE	GT	FreeBayes	alldifficult	aaaaaa	FN	23087	0.0472923	0.0282546
HG002+HG003+HG004	NovaSeq	20	TRUE	GT	FreeBayes	alldifficult	aaaaaa	FP	6726	0.0211258
HG002+HG003+HG004	NovaSeq	20	TRUE	GT	FreeBayes	alldifficult	Aaaaaa	FN	41204	0.0844038	0.100471
HG002+HG003+HG004	NovaSeq	20	TRUE	GT	FreeBayes	alldifficult	Aaaaaa	FP	24483	0.0768989
HG002+HG003+HG004	NovaSeq	20	TRUE	GT	FreeBayes	alldifficult	AAaaaa	FN	62736	0.128511	0.105323
HG002+HG003+HG004	NovaSeq	20	TRUE	GT	FreeBayes	alldifficult	AAaaaa	FP	53067	0.166679
HG002+HG003+HG004	NovaSeq	20	TRUE	GT	FreeBayes	alldifficult	AAAaaa	FN	87085	0.178388	0.11293
HG002+HG003+HG004	NovaSeq	20	TRUE	GT	FreeBayes	alldifficult	AAAaaa	FP	81196	0.255029
HG002+HG003+HG004	NovaSeq	20	TRUE	GT	FreeBayes	alldifficult	AAAAaa	FN	135311	0.277176	0.109254
HG002+HG003+HG004	NovaSeq	20	TRUE	GT	FreeBayes	alldifficult	AAAAaa	FP	80808	0.253811
HG002+HG003+HG004	NovaSeq	20	TRUE	GT	FreeBayes	alldifficult	AAAAAa	FN	138754	0.284229	0.13025
HG002+HG003+HG004	NovaSeq	20	TRUE	GT	FreeBayes	alldifficult	AAAAAa	FP	72099	0.226457
HG002+HG003+HG004	NovaSeq	20	TRUE	GT	Octopus	alllowmapandsegdup	aaaaaa	FN	5303	0.0387723	0.00648998
HG002+HG003+HG004	NovaSeq	20	TRUE	GT	Octopus	alllowmapandsegdup	aaaaaa	FP	1693	0.0203317
HG002+HG003+HG004	NovaSeq	20	TRUE	GT	Octopus	alllowmapandsegdup	Aaaaaa	FN	9701	0.0709277	0.0236546
HG002+HG003+HG004	NovaSeq	20	TRUE	GT	Octopus	alllowmapandsegdup	Aaaaaa	FP	5988	0.0719115
HG002+HG003+HG004	NovaSeq	20	TRUE	GT	Octopus	alllowmapandsegdup	AAaaaa	FN	17376	0.127043	0.0291713
HG002+HG003+HG004	NovaSeq	20	TRUE	GT	Octopus	alllowmapandsegdup	AAaaaa	FP	12872	0.154583
HG002+HG003+HG004	NovaSeq	20	TRUE	GT	Octopus	alllowmapandsegdup	AAAaaa	FN	24080	0.176058	0.0312264
HG002+HG003+HG004	NovaSeq	20	TRUE	GT	Octopus	alllowmapandsegdup	AAAaaa	FP	21126	0.253708
HG002+HG003+HG004	NovaSeq	20	TRUE	GT	Octopus	alllowmapandsegdup	AAAAaa	FN	34964	0.255635	0.028231
HG002+HG003+HG004	NovaSeq	20	TRUE	GT	Octopus	alllowmapandsegdup	AAAAaa	FP	25026	0.300544
HG002+HG003+HG004	NovaSeq	20	TRUE	GT	Octopus	alllowmapandsegdup	AAAAAa	FN	45349	0.331564	0.0425697
HG002+HG003+HG004	NovaSeq	20	TRUE	GT	Octopus	alllowmapandsegdup	AAAAAa	FP	16564	0.198922
HG002+HG003+HG004	NovaSeq	20	TRUE	GT	GATK4	alllowmapandsegdup	aaaaaa	FN	15759	0.0936186	0.0192864
HG002+HG003+HG004	NovaSeq	20	TRUE	GT	GATK4	alllowmapandsegdup	aaaaaa	FP	1054	0.0106093
HG002+HG003+HG004	NovaSeq	20	TRUE	GT	GATK4	alllowmapandsegdup	Aaaaaa	FN	12582	0.0747451	0.0306796
HG002+HG003+HG004	NovaSeq	20	TRUE	GT	GATK4	alllowmapandsegdup	Aaaaaa	FP	6992	0.0703796
HG002+HG003+HG004	NovaSeq	20	TRUE	GT	GATK4	alllowmapandsegdup	AAaaaa	FN	22355	0.132803	0.0375302
HG002+HG003+HG004	NovaSeq	20	TRUE	GT	GATK4	alllowmapandsegdup	AAaaaa	FP	13801	0.138917
HG002+HG003+HG004	NovaSeq	20	TRUE	GT	GATK4	alllowmapandsegdup	AAAaaa	FN	30733	0.182574	0.0398538
HG002+HG003+HG004	NovaSeq	20	TRUE	GT	GATK4	alllowmapandsegdup	AAAaaa	FP	21914	0.22058
HG002+HG003+HG004	NovaSeq	20	TRUE	GT	GATK4	alllowmapandsegdup	AAAAaa	FN	43947	0.261073	0.0354841
HG002+HG003+HG004	NovaSeq	20	TRUE	GT	GATK4	alllowmapandsegdup	AAAAaa	FP	26155	0.263269
HG002+HG003+HG004	NovaSeq	20	TRUE	GT	GATK4	alllowmapandsegdup	AAAAAa	FN	42956	0.255186	0.0403234
HG002+HG003+HG004	NovaSeq	20	TRUE	GT	GATK4	alllowmapandsegdup	AAAAAa	FP	29431	0.296244
HG002+HG003+HG004	NovaSeq	20	TRUE	GT	FreeBayes	alllowmapandsegdup	aaaaaa	FN	8157	0.0506803	0.00998279
HG002+HG003+HG004	NovaSeq	20	TRUE	GT	FreeBayes	alllowmapandsegdup	aaaaaa	FP	1267	0.0124685
HG002+HG003+HG004	NovaSeq	20	TRUE	GT	FreeBayes	alllowmapandsegdup	Aaaaaa	FN	14960	0.0929481	0.036478
HG002+HG003+HG004	NovaSeq	20	TRUE	GT	FreeBayes	alllowmapandsegdup	Aaaaaa	FP	6010	0.0591442
HG002+HG003+HG004	NovaSeq	20	TRUE	GT	FreeBayes	alllowmapandsegdup	AAaaaa	FN	20878	0.129717	0.0350505
HG002+HG003+HG004	NovaSeq	20	TRUE	GT	FreeBayes	alllowmapandsegdup	AAaaaa	FP	15337	0.150931
HG002+HG003+HG004	NovaSeq	20	TRUE	GT	FreeBayes	alllowmapandsegdup	AAAaaa	FN	29013	0.180261	0.0376234
HG002+HG003+HG004	NovaSeq	20	TRUE	GT	FreeBayes	alllowmapandsegdup	AAAaaa	FP	24312	0.239254
HG002+HG003+HG004	NovaSeq	20	TRUE	GT	FreeBayes	alllowmapandsegdup	AAAAaa	FN	42225	0.262349	0.0340937
HG002+HG003+HG004	NovaSeq	20	TRUE	GT	FreeBayes	alllowmapandsegdup	AAAAaa	FP	28212	0.277633
HG002+HG003+HG004	NovaSeq	20	TRUE	GT	FreeBayes	alllowmapandsegdup	AAAAAa	FN	45717	0.284045	0.0429152
HG002+HG003+HG004	NovaSeq	20	TRUE	GT	FreeBayes	alllowmapandsegdup	AAAAAa	FP	26478	0.260569
HG002+HG003+HG004	NovaSeq	20	TRUE	GT	Octopus	notinalldifficult	aaaaaa	FN	8563	0.00741306	0.0104797
HG002+HG003+HG004	NovaSeq	20	TRUE	GT	Octopus	notinalldifficult	aaaaaa	FP	11508	0.0133145
HG002+HG003+HG004	NovaSeq	20	TRUE	GT	Octopus	notinalldifficult	Aaaaaa	FN	57941	0.05016	0.141282
HG002+HG003+HG004	NovaSeq	20	TRUE	GT	Octopus	notinalldifficult	Aaaaaa	FP	82639	0.0956117
HG002+HG003+HG004	NovaSeq	20	TRUE	GT	Octopus	notinalldifficult	AAaaaa	FN	155566	0.134675	0.261168
HG002+HG003+HG004	NovaSeq	20	TRUE	GT	Octopus	notinalldifficult	AAaaaa	FP	155472	0.179878
HG002+HG003+HG004	NovaSeq	20	TRUE	GT	Octopus	notinalldifficult	AAAaaa	FN	218229	0.188923	0.282994
HG002+HG003+HG004	NovaSeq	20	TRUE	GT	Octopus	notinalldifficult	AAAaaa	FP	249739	0.288943
HG002+HG003+HG004	NovaSeq	20	TRUE	GT	Octopus	notinalldifficult	AAAAaa	FN	334066	0.289204	0.269735
HG002+HG003+HG004	NovaSeq	20	TRUE	GT	Octopus	notinalldifficult	AAAAaa	FP	228663	0.264559
HG002+HG003+HG004	NovaSeq	20	TRUE	GT	Octopus	notinalldifficult	AAAAAa	FN	380759	0.329626	0.357424
HG002+HG003+HG004	NovaSeq	20	TRUE	GT	Octopus	notinalldifficult	AAAAAa	FP	136298	0.157694
HG002+HG003+HG004	NovaSeq	20	TRUE	GT	GATK4	notinalldifficult	aaaaaa	FN	10454	0.0078313	0.0127939
HG002+HG003+HG004	NovaSeq	20	TRUE	GT	GATK4	notinalldifficult	aaaaaa	FP	11665	0.0107677
HG002+HG003+HG004	NovaSeq	20	TRUE	GT	GATK4	notinalldifficult	Aaaaaa	FN	75548	0.0565945	0.184214
HG002+HG003+HG004	NovaSeq	20	TRUE	GT	GATK4	notinalldifficult	Aaaaaa	FP	102793	0.0948861
HG002+HG003+HG004	NovaSeq	20	TRUE	GT	GATK4	notinalldifficult	AAaaaa	FN	203449	0.152408	0.341556
HG002+HG003+HG004	NovaSeq	20	TRUE	GT	GATK4	notinalldifficult	AAaaaa	FP	189223	0.174668
HG002+HG003+HG004	NovaSeq	20	TRUE	GT	GATK4	notinalldifficult	AAAaaa	FN	279705	0.209533	0.362715
HG002+HG003+HG004	NovaSeq	20	TRUE	GT	GATK4	notinalldifficult	AAAaaa	FP	291876	0.269425
HG002+HG003+HG004	NovaSeq	20	TRUE	GT	GATK4	notinalldifficult	AAAAaa	FN	416274	0.311839	0.336112
HG002+HG003+HG004	NovaSeq	20	TRUE	GT	GATK4	notinalldifficult	AAAAaa	FP	276584	0.255309
HG002+HG003+HG004	NovaSeq	20	TRUE	GT	GATK4	notinalldifficult	AAAAAa	FN	349470	0.261795	0.328052
HG002+HG003+HG004	NovaSeq	20	TRUE	GT	GATK4	notinalldifficult	AAAAAa	FP	211189	0.194944
HG002+HG003+HG004	NovaSeq	20	TRUE	GT	FreeBayes	notinalldifficult	aaaaaa	FN	22271	0.0155788	0.0272559
HG002+HG003+HG004	NovaSeq	20	TRUE	GT	FreeBayes	notinalldifficult	aaaaaa	FP	11624	0.0100662
HG002+HG003+HG004	NovaSeq	20	TRUE	GT	FreeBayes	notinalldifficult	Aaaaaa	FN	114402	0.0800256	0.278954
HG002+HG003+HG004	NovaSeq	20	TRUE	GT	FreeBayes	notinalldifficult	Aaaaaa	FP	97904	0.084783
HG002+HG003+HG004	NovaSeq	20	TRUE	GT	FreeBayes	notinalldifficult	AAaaaa	FN	202806	0.141865	0.340476
HG002+HG003+HG004	NovaSeq	20	TRUE	GT	FreeBayes	notinalldifficult	AAaaaa	FP	195624	0.169407
HG002+HG003+HG004	NovaSeq	20	TRUE	GT	FreeBayes	notinalldifficult	AAAaaa	FN	277587	0.194175	0.359968
HG002+HG003+HG004	NovaSeq	20	TRUE	GT	FreeBayes	notinalldifficult	AAAaaa	FP	301240	0.260868
HG002+HG003+HG004	NovaSeq	20	TRUE	GT	FreeBayes	notinalldifficult	AAAAaa	FN	425561	0.297685	0.343611
HG002+HG003+HG004	NovaSeq	20	TRUE	GT	FreeBayes	notinalldifficult	AAAAaa	FP	272761	0.236206
HG002+HG003+HG004	NovaSeq	20	TRUE	GT	FreeBayes	notinalldifficult	AAAAAa	FN	386941	0.27067	0.363227
HG002+HG003+HG004	NovaSeq	20	TRUE	GT	FreeBayes	notinalldifficult	AAAAAa	FP	275607	0.23867
HG002+HG003+HG004	NovaSeq	20	TRUE	GT	Octopus	notinalllowmapandsegdup	aaaaaa	FN	12212	0.00873232	0.0149454
HG002+HG003+HG004	NovaSeq	20	TRUE	GT	Octopus	notinalllowmapandsegdup	aaaaaa	FP	17330	0.016272
HG002+HG003+HG004	NovaSeq	20	TRUE	GT	Octopus	notinalllowmapandsegdup	Aaaaaa	FN	71339	0.0510117	0.173951
HG002+HG003+HG004	NovaSeq	20	TRUE	GT	Octopus	notinalllowmapandsegdup	Aaaaaa	FP	101677	0.0954697
HG002+HG003+HG004	NovaSeq	20	TRUE	GT	Octopus	notinalllowmapandsegdup	AAaaaa	FN	187943	0.134391	0.315524
HG002+HG003+HG004	NovaSeq	20	TRUE	GT	Octopus	notinalllowmapandsegdup	AAaaaa	FP	189951	0.178355
HG002+HG003+HG004	NovaSeq	20	TRUE	GT	Octopus	notinalllowmapandsegdup	AAAaaa	FN	263498	0.188417	0.341698
HG002+HG003+HG004	NovaSeq	20	TRUE	GT	Octopus	notinalllowmapandsegdup	AAAaaa	FP	304565	0.285971
HG002+HG003+HG004	NovaSeq	20	TRUE	GT	Octopus	notinalllowmapandsegdup	AAAAaa	FN	404642	0.289344	0.32672
HG002+HG003+HG004	NovaSeq	20	TRUE	GT	Octopus	notinalllowmapandsegdup	AAAAaa	FP	281294	0.264121
HG002+HG003+HG004	NovaSeq	20	TRUE	GT	Octopus	notinalllowmapandsegdup	AAAAAa	FN	458849	0.328105	0.430728
HG002+HG003+HG004	NovaSeq	20	TRUE	GT	Octopus	notinalllowmapandsegdup	AAAAAa	FP	170202	0.159811
HG002+HG003+HG004	NovaSeq	20	TRUE	GT	GATK4	notinalllowmapandsegdup	aaaaaa	FN	15037	0.00924619	0.0184028
HG002+HG003+HG004	NovaSeq	20	TRUE	GT	GATK4	notinalllowmapandsegdup	aaaaaa	FP	17202	0.0131622
HG002+HG003+HG004	NovaSeq	20	TRUE	GT	GATK4	notinalllowmapandsegdup	Aaaaaa	FN	91641	0.0563497	0.223455
HG002+HG003+HG004	NovaSeq	20	TRUE	GT	GATK4	notinalllowmapandsegdup	Aaaaaa	FP	126402	0.096717
HG002+HG003+HG004	NovaSeq	20	TRUE	GT	GATK4	notinalllowmapandsegdup	AAaaaa	FN	244288	0.150212	0.410117
HG002+HG003+HG004	NovaSeq	20	TRUE	GT	GATK4	notinalllowmapandsegdup	AAaaaa	FP	227654	0.17419
HG002+HG003+HG004	NovaSeq	20	TRUE	GT	GATK4	notinalllowmapandsegdup	AAAaaa	FN	335806	0.206486	0.435465
HG002+HG003+HG004	NovaSeq	20	TRUE	GT	GATK4	notinalllowmapandsegdup	AAAaaa	FP	350754	0.268381
HG002+HG003+HG004	NovaSeq	20	TRUE	GT	GATK4	notinalllowmapandsegdup	AAAAaa	FN	503398	0.309537	0.406458
HG002+HG003+HG004	NovaSeq	20	TRUE	GT	GATK4	notinalllowmapandsegdup	AAAAaa	FP	332654	0.254532
HG002+HG003+HG004	NovaSeq	20	TRUE	GT	GATK4	notinalllowmapandsegdup	AAAAAa	FN	436122	0.26817	0.409394
HG002+HG003+HG004	NovaSeq	20	TRUE	GT	GATK4	notinalllowmapandsegdup	AAAAAa	FP	252260	0.193018
HG002+HG003+HG004	NovaSeq	20	TRUE	GT	FreeBayes	notinalllowmapandsegdup	aaaaaa	FN	37220	0.0211901	0.045551
HG002+HG003+HG004	NovaSeq	20	TRUE	GT	FreeBayes	notinalllowmapandsegdup	aaaaaa	FP	15895	0.0117694
HG002+HG003+HG004	NovaSeq	20	TRUE	GT	FreeBayes	notinalllowmapandsegdup	Aaaaaa	FN	140639	0.0800688	0.34293
HG002+HG003+HG004	NovaSeq	20	TRUE	GT	FreeBayes	notinalllowmapandsegdup	Aaaaaa	FP	114589	0.0848469
HG002+HG003+HG004	NovaSeq	20	TRUE	GT	FreeBayes	notinalllowmapandsegdup	AAaaaa	FN	244641	0.139279	0.41071
HG002+HG003+HG004	NovaSeq	20	TRUE	GT	FreeBayes	notinalllowmapandsegdup	AAaaaa	FP	229414	0.169869
HG002+HG003+HG004	NovaSeq	20	TRUE	GT	FreeBayes	notinalllowmapandsegdup	AAAaaa	FN	335615	0.191073	0.435218
HG002+HG003+HG004	NovaSeq	20	TRUE	GT	FreeBayes	notinalllowmapandsegdup	AAAaaa	FP	352380	0.260918
HG002+HG003+HG004	NovaSeq	20	TRUE	GT	FreeBayes	notinalllowmapandsegdup	AAAAaa	FN	518534	0.295213	0.41868
HG002+HG003+HG004	NovaSeq	20	TRUE	GT	FreeBayes	notinalllowmapandsegdup	AAAAaa	FP	320136	0.237043
HG002+HG003+HG004	NovaSeq	20	TRUE	GT	FreeBayes	notinalllowmapandsegdup	AAAAAa	FN	479828	0.273176	0.450421
HG002+HG003+HG004	NovaSeq	20	TRUE	GT	FreeBayes	notinalllowmapandsegdup	AAAAAa	FP	318124	0.235554
HG002+HG003+HG004	NovaSeq	20	TRUE	GT	Octopus	AllTandemRepeatsandHomopolymers	aaaaaa	FN	3063	0.0187089	0.0037486
HG002+HG003+HG004	NovaSeq	20	TRUE	GT	Octopus	AllTandemRepeatsandHomopolymers	aaaaaa	FP	5003	0.0353967
HG002+HG003+HG004	NovaSeq	20	TRUE	GT	Octopus	AllTandemRepeatsandHomopolymers	Aaaaaa	FN	9313	0.0568841	0.0227085
HG002+HG003+HG004	NovaSeq	20	TRUE	GT	Octopus	AllTandemRepeatsandHomopolymers	Aaaaaa	FP	13230	0.0936034
HG002+HG003+HG004	NovaSeq	20	TRUE	GT	Octopus	AllTandemRepeatsandHomopolymers	AAaaaa	FN	21066	0.128672	0.0353662
HG002+HG003+HG004	NovaSeq	20	TRUE	GT	Octopus	AllTandemRepeatsandHomopolymers	AAaaaa	FP	24026	0.169986
HG002+HG003+HG004	NovaSeq	20	TRUE	GT	Octopus	AllTandemRepeatsandHomopolymers	AAAaaa	FN	30535	0.186509	0.0395971
HG002+HG003+HG004	NovaSeq	20	TRUE	GT	Octopus	AllTandemRepeatsandHomopolymers	AAAaaa	FP	37544	0.265627
HG002+HG003+HG004	NovaSeq	20	TRUE	GT	Octopus	AllTandemRepeatsandHomopolymers	AAAAaa	FN	47239	0.288537	0.0381422
HG002+HG003+HG004	NovaSeq	20	TRUE	GT	Octopus	AllTandemRepeatsandHomopolymers	AAAAaa	FP	37211	0.263271
HG002+HG003+HG004	NovaSeq	20	TRUE	GT	Octopus	AllTandemRepeatsandHomopolymers	AAAAAa	FN	52503	0.32069	0.0492853
HG002+HG003+HG004	NovaSeq	20	TRUE	GT	Octopus	AllTandemRepeatsandHomopolymers	AAAAAa	FP	24327	0.172116
HG002+HG003+HG004	NovaSeq	20	TRUE	GT	GATK4	AllTandemRepeatsandHomopolymers	aaaaaa	FN	3877	0.0195362	0.00474479
HG002+HG003+HG004	NovaSeq	20	TRUE	GT	GATK4	AllTandemRepeatsandHomopolymers	aaaaaa	FP	4729	0.0320717
HG002+HG003+HG004	NovaSeq	20	TRUE	GT	GATK4	AllTandemRepeatsandHomopolymers	Aaaaaa	FN	10689	0.0538619	0.0260637
HG002+HG003+HG004	NovaSeq	20	TRUE	GT	GATK4	AllTandemRepeatsandHomopolymers	Aaaaaa	FP	16418	0.111345
HG002+HG003+HG004	NovaSeq	20	TRUE	GT	GATK4	AllTandemRepeatsandHomopolymers	AAaaaa	FN	26223	0.132138	0.0440239
HG002+HG003+HG004	NovaSeq	20	TRUE	GT	GATK4	AllTandemRepeatsandHomopolymers	AAaaaa	FP	25472	0.172749
HG002+HG003+HG004	NovaSeq	20	TRUE	GT	GATK4	AllTandemRepeatsandHomopolymers	AAAaaa	FN	37032	0.186604	0.0480222
HG002+HG003+HG004	NovaSeq	20	TRUE	GT	GATK4	AllTandemRepeatsandHomopolymers	AAAaaa	FP	38696	0.262433
HG002+HG003+HG004	NovaSeq	20	TRUE	GT	GATK4	AllTandemRepeatsandHomopolymers	AAAAaa	FN	57955	0.292035	0.0467946
HG002+HG003+HG004	NovaSeq	20	TRUE	GT	GATK4	AllTandemRepeatsandHomopolymers	AAAAaa	FP	36998	0.250917
HG002+HG003+HG004	NovaSeq	20	TRUE	GT	GATK4	AllTandemRepeatsandHomopolymers	AAAAAa	FN	62676	0.315824	0.0588348
HG002+HG003+HG004	NovaSeq	20	TRUE	GT	GATK4	AllTandemRepeatsandHomopolymers	AAAAAa	FP	25138	0.170484
HG002+HG003+HG004	NovaSeq	20	TRUE	GT	FreeBayes	AllTandemRepeatsandHomopolymers	aaaaaa	FN	12882	0.0567939	0.0157654
HG002+HG003+HG004	NovaSeq	20	TRUE	GT	FreeBayes	AllTandemRepeatsandHomopolymers	aaaaaa	FP	4756	0.0342995
HG002+HG003+HG004	NovaSeq	20	TRUE	GT	FreeBayes	AllTandemRepeatsandHomopolymers	Aaaaaa	FN	18023	0.0794595	0.0439467
HG002+HG003+HG004	NovaSeq	20	TRUE	GT	FreeBayes	AllTandemRepeatsandHomopolymers	Aaaaaa	FP	11765	0.0848472
HG002+HG003+HG004	NovaSeq	20	TRUE	GT	FreeBayes	AllTandemRepeatsandHomopolymers	AAaaaa	FN	27378	0.120704	0.0459629
HG002+HG003+HG004	NovaSeq	20	TRUE	GT	FreeBayes	AllTandemRepeatsandHomopolymers	AAaaaa	FP	24767	0.178615
HG002+HG003+HG004	NovaSeq	20	TRUE	GT	FreeBayes	AllTandemRepeatsandHomopolymers	AAAaaa	FN	39118	0.172463	0.0507273
HG002+HG003+HG004	NovaSeq	20	TRUE	GT	FreeBayes	AllTandemRepeatsandHomopolymers	AAAaaa	FP	36603	0.263975
HG002+HG003+HG004	NovaSeq	20	TRUE	GT	FreeBayes	AllTandemRepeatsandHomopolymers	AAAAaa	FN	63131	0.278331	0.0509738
HG002+HG003+HG004	NovaSeq	20	TRUE	GT	FreeBayes	AllTandemRepeatsandHomopolymers	AAAAaa	FP	34183	0.246522
HG002+HG003+HG004	NovaSeq	20	TRUE	GT	FreeBayes	AllTandemRepeatsandHomopolymers	AAAAAa	FN	66288	0.292249	0.0622255
HG002+HG003+HG004	NovaSeq	20	TRUE	GT	FreeBayes	AllTandemRepeatsandHomopolymers	AAAAAa	FP	26587	0.191741
HG002+HG003+HG004	NovaSeq	20	TRUE	GT	Octopus	notinAllTandemRepeatsandHomopolymers	aaaaaa	FN	14453	0.0105357	0.017688
HG002+HG003+HG004	NovaSeq	20	TRUE	GT	Octopus	notinAllTandemRepeatsandHomopolymers	aaaaaa	FP	14022	0.013923
HG002+HG003+HG004	NovaSeq	20	TRUE	GT	Octopus	notinAllTandemRepeatsandHomopolymers	Aaaaaa	FN	71740	0.052296	0.174929
HG002+HG003+HG004	NovaSeq	20	TRUE	GT	Octopus	notinAllTandemRepeatsandHomopolymers	Aaaaaa	FP	94432	0.0937655
HG002+HG003+HG004	NovaSeq	20	TRUE	GT	Octopus	notinAllTandemRepeatsandHomopolymers	AAaaaa	FN	184286	0.134338	0.309384
HG002+HG003+HG004	NovaSeq	20	TRUE	GT	Octopus	notinAllTandemRepeatsandHomopolymers	AAaaaa	FP	178825	0.177563
HG002+HG003+HG004	NovaSeq	20	TRUE	GT	Octopus	notinAllTandemRepeatsandHomopolymers	AAAaaa	FN	257083	0.187405	0.333379
HG002+HG003+HG004	NovaSeq	20	TRUE	GT	Octopus	notinAllTandemRepeatsandHomopolymers	AAAaaa	FP	288212	0.286178
HG002+HG003+HG004	NovaSeq	20	TRUE	GT	Octopus	notinAllTandemRepeatsandHomopolymers	AAAAaa	FN	392473	0.286099	0.316894
HG002+HG003+HG004	NovaSeq	20	TRUE	GT	Octopus	notinAllTandemRepeatsandHomopolymers	AAAAaa	FP	269136	0.267236
HG002+HG003+HG004	NovaSeq	20	TRUE	GT	Octopus	notinAllTandemRepeatsandHomopolymers	AAAAAa	FN	451772	0.329326	0.424085
HG002+HG003+HG004	NovaSeq	20	TRUE	GT	Octopus	notinAllTandemRepeatsandHomopolymers	AAAAAa	FP	162481	0.161334
HG002+HG003+HG004	NovaSeq	20	TRUE	GT	GATK4	notinAllTandemRepeatsandHomopolymers	aaaaaa	FN	26926	0.0168657	0.0329529
HG002+HG003+HG004	NovaSeq	20	TRUE	GT	GATK4	notinAllTandemRepeatsandHomopolymers	aaaaaa	FP	13529	0.0107452
HG002+HG003+HG004	NovaSeq	20	TRUE	GT	GATK4	notinAllTandemRepeatsandHomopolymers	Aaaaaa	FN	93547	0.0585953	0.228102
HG002+HG003+HG004	NovaSeq	20	TRUE	GT	GATK4	notinAllTandemRepeatsandHomopolymers	Aaaaaa	FP	116989	0.0929168
HG002+HG003+HG004	NovaSeq	20	TRUE	GT	GATK4	notinAllTandemRepeatsandHomopolymers	AAaaaa	FN	240463	0.150619	0.403696
HG002+HG003+HG004	NovaSeq	20	TRUE	GT	GATK4	notinAllTandemRepeatsandHomopolymers	AAaaaa	FP	216026	0.171576
HG002+HG003+HG004	NovaSeq	20	TRUE	GT	GATK4	notinAllTandemRepeatsandHomopolymers	AAAaaa	FN	329564	0.20643	0.427371
HG002+HG003+HG004	NovaSeq	20	TRUE	GT	GATK4	notinAllTandemRepeatsandHomopolymers	AAAaaa	FP	334058	0.265321
HG002+HG003+HG004	NovaSeq	20	TRUE	GT	GATK4	notinAllTandemRepeatsandHomopolymers	AAAAaa	FN	489515	0.306619	0.395249
HG002+HG003+HG004	NovaSeq	20	TRUE	GT	GATK4	notinAllTandemRepeatsandHomopolymers	AAAAaa	FP	321848	0.255623
HG002+HG003+HG004	NovaSeq	20	TRUE	GT	GATK4	notinAllTandemRepeatsandHomopolymers	AAAAAa	FN	416479	0.260871	0.390955
HG002+HG003+HG004	NovaSeq	20	TRUE	GT	GATK4	notinAllTandemRepeatsandHomopolymers	AAAAAa	FP	256622	0.203818
HG002+HG003+HG004	NovaSeq	20	TRUE	GT	FreeBayes	notinAllTandemRepeatsandHomopolymers	aaaaaa	FN	32484	0.0192099	0.0397549
HG002+HG003+HG004	NovaSeq	20	TRUE	GT	FreeBayes	notinAllTandemRepeatsandHomopolymers	aaaaaa	FP	13683	0.0102393
HG002+HG003+HG004	NovaSeq	20	TRUE	GT	FreeBayes	notinAllTandemRepeatsandHomopolymers	Aaaaaa	FN	137589	0.0813652	0.335493
HG002+HG003+HG004	NovaSeq	20	TRUE	GT	FreeBayes	notinAllTandemRepeatsandHomopolymers	Aaaaaa	FP	110774	0.0828943
HG002+HG003+HG004	NovaSeq	20	TRUE	GT	FreeBayes	notinAllTandemRepeatsandHomopolymers	AAaaaa	FN	238181	0.140852	0.399865
HG002+HG003+HG004	NovaSeq	20	TRUE	GT	FreeBayes	notinAllTandemRepeatsandHomopolymers	AAaaaa	FP	224287	0.167838
HG002+HG003+HG004	NovaSeq	20	TRUE	GT	FreeBayes	notinAllTandemRepeatsandHomopolymers	AAAaaa	FN	325568	0.192529	0.422189
HG002+HG003+HG004	NovaSeq	20	TRUE	GT	FreeBayes	notinAllTandemRepeatsandHomopolymers	AAAaaa	FP	346323	0.25916
HG002+HG003+HG004	NovaSeq	20	TRUE	GT	FreeBayes	notinAllTandemRepeatsandHomopolymers	AAAAaa	FN	497766	0.294361	0.401911
HG002+HG003+HG004	NovaSeq	20	TRUE	GT	FreeBayes	notinAllTandemRepeatsandHomopolymers	AAAAaa	FP	319877	0.23937
HG002+HG003+HG004	NovaSeq	20	TRUE	GT	FreeBayes	notinAllTandemRepeatsandHomopolymers	AAAAAa	FN	459418	0.271683	0.431262
HG002+HG003+HG004	NovaSeq	20	TRUE	GT	FreeBayes	notinAllTandemRepeatsandHomopolymers	AAAAAa	FP	321384	0.240498
HG002+HG003+HG004	NovaSeq	30	TRUE	GT	Octopus	genome	aaaaaa	FN	18799	0.0191079	0.0230068
HG002+HG003+HG004	NovaSeq	30	TRUE	GT	Octopus	genome	aaaaaa	FP	5519	0.00648096
HG002+HG003+HG004	NovaSeq	30	TRUE	GT	Octopus	genome	Aaaaaa	FN	50934	0.0517708	0.124196
HG002+HG003+HG004	NovaSeq	30	TRUE	GT	Octopus	genome	Aaaaaa	FP	77116	0.0905573
HG002+HG003+HG004	NovaSeq	30	TRUE	GT	Octopus	genome	AAaaaa	FN	146414	0.14882	0.245804
HG002+HG003+HG004	NovaSeq	30	TRUE	GT	Octopus	genome	AAaaaa	FP	143790	0.168853
HG002+HG003+HG004	NovaSeq	30	TRUE	GT	Octopus	genome	AAAaaa	FN	210872	0.214337	0.273454
HG002+HG003+HG004	NovaSeq	30	TRUE	GT	Octopus	genome	AAAaaa	FP	240879	0.282864
HG002+HG003+HG004	NovaSeq	30	TRUE	GT	Octopus	genome	AAAAaa	FN	314235	0.319398	0.253723
HG002+HG003+HG004	NovaSeq	30	TRUE	GT	Octopus	genome	AAAAaa	FP	222684	0.261498
HG002+HG003+HG004	NovaSeq	30	TRUE	GT	Octopus	genome	AAAAAa	FN	242582	0.246568	0.227715
HG002+HG003+HG004	NovaSeq	30	TRUE	GT	Octopus	genome	AAAAAa	FP	161583	0.189747
HG002+HG003+HG004	NovaSeq	30	TRUE	GT	GATK4	genome	aaaaaa	FN	32629	0.0238361	0.0399324
HG002+HG003+HG004	NovaSeq	30	TRUE	GT	GATK4	genome	aaaaaa	FP	4703	0.00419489
HG002+HG003+HG004	NovaSeq	30	TRUE	GT	GATK4	genome	Aaaaaa	FN	74389	0.0543426	0.181388
HG002+HG003+HG004	NovaSeq	30	TRUE	GT	GATK4	genome	Aaaaaa	FP	101190	0.0902575
HG002+HG003+HG004	NovaSeq	30	TRUE	GT	GATK4	genome	AAaaaa	FN	207591	0.151649	0.348509
HG002+HG003+HG004	NovaSeq	30	TRUE	GT	GATK4	genome	AAaaaa	FP	192364	0.171581
HG002+HG003+HG004	NovaSeq	30	TRUE	GT	GATK4	genome	AAAaaa	FN	294952	0.215468	0.382487
HG002+HG003+HG004	NovaSeq	30	TRUE	GT	GATK4	genome	AAAaaa	FP	306565	0.273444
HG002+HG003+HG004	NovaSeq	30	TRUE	GT	GATK4	genome	AAAAaa	FN	424729	0.310273	0.342939
HG002+HG003+HG004	NovaSeq	30	TRUE	GT	GATK4	genome	AAAAaa	FP	291951	0.260409
HG002+HG003+HG004	NovaSeq	30	TRUE	GT	GATK4	genome	AAAAAa	FN	334600	0.244432	0.314094
HG002+HG003+HG004	NovaSeq	30	TRUE	GT	GATK4	genome	AAAAAa	FP	224353	0.200114
HG002+HG003+HG004	NovaSeq	30	TRUE	GT	FreeBayes	genome	aaaaaa	FN	42975	0.0302641	0.0525942
HG002+HG003+HG004	NovaSeq	30	TRUE	GT	FreeBayes	genome	aaaaaa	FP	5871	0.00520457
HG002+HG003+HG004	NovaSeq	30	TRUE	GT	FreeBayes	genome	Aaaaaa	FN	105827	0.0745261	0.258045
HG002+HG003+HG004	NovaSeq	30	TRUE	GT	FreeBayes	genome	Aaaaaa	FP	90086	0.0798601
HG002+HG003+HG004	NovaSeq	30	TRUE	GT	FreeBayes	genome	AAaaaa	FN	211670	0.149063	0.355357
HG002+HG003+HG004	NovaSeq	30	TRUE	GT	FreeBayes	genome	AAaaaa	FP	192441	0.170596
HG002+HG003+HG004	NovaSeq	30	TRUE	GT	FreeBayes	genome	AAAaaa	FN	296742	0.208973	0.384808
HG002+HG003+HG004	NovaSeq	30	TRUE	GT	FreeBayes	genome	AAAaaa	FP	309612	0.274467
HG002+HG003+HG004	NovaSeq	30	TRUE	GT	FreeBayes	genome	AAAAaa	FN	434227	0.305794	0.350608
HG002+HG003+HG004	NovaSeq	30	TRUE	GT	FreeBayes	genome	AAAAaa	FP	289109	0.256291
HG002+HG003+HG004	NovaSeq	30	TRUE	GT	FreeBayes	genome	AAAAAa	FN	328559	0.23138	0.308423
HG002+HG003+HG004	NovaSeq	30	TRUE	GT	FreeBayes	genome	AAAAAa	FP	240929	0.21358
HG002+HG003+HG004	NovaSeq	30	TRUE	GT	Octopus	alldifficult	aaaaaa	FN	8362	0.0318146	0.0102337
HG002+HG003+HG004	NovaSeq	30	TRUE	GT	Octopus	alldifficult	aaaaaa	FP	3055	0.0136339
HG002+HG003+HG004	NovaSeq	30	TRUE	GT	Octopus	alldifficult	Aaaaaa	FN	16180	0.0615595	0.0394528
HG002+HG003+HG004	NovaSeq	30	TRUE	GT	Octopus	alldifficult	Aaaaaa	FP	17896	0.0798668
HG002+HG003+HG004	NovaSeq	30	TRUE	GT	Octopus	alldifficult	AAaaaa	FN	37719	0.143508	0.0633237
HG002+HG003+HG004	NovaSeq	30	TRUE	GT	Octopus	alldifficult	AAaaaa	FP	34613	0.154472
HG002+HG003+HG004	NovaSeq	30	TRUE	GT	Octopus	alldifficult	AAAaaa	FN	53543	0.203713	0.0694333
HG002+HG003+HG004	NovaSeq	30	TRUE	GT	Octopus	alldifficult	AAAaaa	FP	58476	0.260969
HG002+HG003+HG004	NovaSeq	30	TRUE	GT	Octopus	alldifficult	AAAAaa	FN	78738	0.299572	0.0635754
HG002+HG003+HG004	NovaSeq	30	TRUE	GT	Octopus	alldifficult	AAAAaa	FP	60482	0.269921
HG002+HG003+HG004	NovaSeq	30	TRUE	GT	Octopus	alldifficult	AAAAAa	FN	68293	0.259832	0.0641076
HG002+HG003+HG004	NovaSeq	30	TRUE	GT	Octopus	alldifficult	AAAAAa	FP	49551	0.221138
HG002+HG003+HG004	NovaSeq	30	TRUE	GT	GATK4	alldifficult	aaaaaa	FN	20475	0.0556997	0.0250579
HG002+HG003+HG004	NovaSeq	30	TRUE	GT	GATK4	alldifficult	aaaaaa	FP	2288	0.00860215
HG002+HG003+HG004	NovaSeq	30	TRUE	GT	GATK4	alldifficult	Aaaaaa	FN	22413	0.0609718	0.0546512
HG002+HG003+HG004	NovaSeq	30	TRUE	GT	GATK4	alldifficult	Aaaaaa	FP	22797	0.0857095
HG002+HG003+HG004	NovaSeq	30	TRUE	GT	GATK4	alldifficult	AAaaaa	FN	51309	0.13958	0.0861389
HG002+HG003+HG004	NovaSeq	30	TRUE	GT	GATK4	alldifficult	AAaaaa	FP	42121	0.158362
HG002+HG003+HG004	NovaSeq	30	TRUE	GT	GATK4	alldifficult	AAAaaa	FN	72439	0.197061	0.0939372
HG002+HG003+HG004	NovaSeq	30	TRUE	GT	GATK4	alldifficult	AAAaaa	FP	67389	0.253361
HG002+HG003+HG004	NovaSeq	30	TRUE	GT	GATK4	alldifficult	AAAAaa	FN	105197	0.286176	0.0849392
HG002+HG003+HG004	NovaSeq	30	TRUE	GT	GATK4	alldifficult	AAAAaa	FP	69325	0.26064
HG002+HG003+HG004	NovaSeq	30	TRUE	GT	GATK4	alldifficult	AAAAAa	FN	95763	0.260512	0.0898941
HG002+HG003+HG004	NovaSeq	30	TRUE	GT	GATK4	alldifficult	AAAAAa	FP	62060	0.233326
HG002+HG003+HG004	NovaSeq	30	TRUE	GT	FreeBayes	alldifficult	aaaaaa	FN	21639	0.0566162	0.0264825
HG002+HG003+HG004	NovaSeq	30	TRUE	GT	FreeBayes	alldifficult	aaaaaa	FP	2853	0.0108128
HG002+HG003+HG004	NovaSeq	30	TRUE	GT	FreeBayes	alldifficult	Aaaaaa	FN	30315	0.0793161	0.0739192
HG002+HG003+HG004	NovaSeq	30	TRUE	GT	FreeBayes	alldifficult	Aaaaaa	FP	18686	0.0708192
HG002+HG003+HG004	NovaSeq	30	TRUE	GT	FreeBayes	alldifficult	AAaaaa	FN	52737	0.137981	0.0885363
HG002+HG003+HG004	NovaSeq	30	TRUE	GT	FreeBayes	alldifficult	AAaaaa	FP	42183	0.159872
HG002+HG003+HG004	NovaSeq	30	TRUE	GT	FreeBayes	alldifficult	AAAaaa	FN	73427	0.192114	0.0952184
HG002+HG003+HG004	NovaSeq	30	TRUE	GT	FreeBayes	alldifficult	AAAaaa	FP	68214	0.258528
HG002+HG003+HG004	NovaSeq	30	TRUE	GT	FreeBayes	alldifficult	AAAAaa	FN	108908	0.284947	0.0879355
HG002+HG003+HG004	NovaSeq	30	TRUE	GT	FreeBayes	alldifficult	AAAAaa	FP	69986	0.265244
HG002+HG003+HG004	NovaSeq	30	TRUE	GT	FreeBayes	alldifficult	AAAAAa	FN	95179	0.249026	0.0893459
HG002+HG003+HG004	NovaSeq	30	TRUE	GT	FreeBayes	alldifficult	AAAAAa	FP	61933	0.234724
HG002+HG003+HG004	NovaSeq	30	TRUE	GT	Octopus	alllowmapandsegdup	aaaaaa	FN	5183	0.050754	0.00634312
HG002+HG003+HG004	NovaSeq	30	TRUE	GT	Octopus	alllowmapandsegdup	aaaaaa	FP	604	0.0081824
HG002+HG003+HG004	NovaSeq	30	TRUE	GT	Octopus	alllowmapandsegdup	Aaaaaa	FN	7748	0.0758715	0.0188925
HG002+HG003+HG004	NovaSeq	30	TRUE	GT	Octopus	alllowmapandsegdup	Aaaaaa	FP	4538	0.0614764
HG002+HG003+HG004	NovaSeq	30	TRUE	GT	Octopus	alllowmapandsegdup	AAaaaa	FN	14227	0.139316	0.0238847
HG002+HG003+HG004	NovaSeq	30	TRUE	GT	Octopus	alllowmapandsegdup	AAaaaa	FP	9906	0.134197
HG002+HG003+HG004	NovaSeq	30	TRUE	GT	Octopus	alllowmapandsegdup	AAAaaa	FN	20139	0.197209	0.0261158
HG002+HG003+HG004	NovaSeq	30	TRUE	GT	Octopus	alllowmapandsegdup	AAAaaa	FP	16991	0.230177
HG002+HG003+HG004	NovaSeq	30	TRUE	GT	Octopus	alllowmapandsegdup	AAAAaa	FN	27413	0.268439	0.0221341
HG002+HG003+HG004	NovaSeq	30	TRUE	GT	Octopus	alllowmapandsegdup	AAAAaa	FP	21573	0.29225
HG002+HG003+HG004	NovaSeq	30	TRUE	GT	Octopus	alllowmapandsegdup	AAAAAa	FN	27410	0.26841	0.0257302
HG002+HG003+HG004	NovaSeq	30	TRUE	GT	Octopus	alllowmapandsegdup	AAAAAa	FP	20205	0.273717
HG002+HG003+HG004	NovaSeq	30	TRUE	GT	GATK4	alllowmapandsegdup	aaaaaa	FN	16065	0.11064	0.0196609
HG002+HG003+HG004	NovaSeq	30	TRUE	GT	GATK4	alllowmapandsegdup	aaaaaa	FP	305	0.00355602
HG002+HG003+HG004	NovaSeq	30	TRUE	GT	GATK4	alllowmapandsegdup	Aaaaaa	FN	10930	0.075275	0.0266514
HG002+HG003+HG004	NovaSeq	30	TRUE	GT	GATK4	alllowmapandsegdup	Aaaaaa	FP	5380	0.0627259
HG002+HG003+HG004	NovaSeq	30	TRUE	GT	GATK4	alllowmapandsegdup	AAaaaa	FN	19422	0.133759	0.0326062
HG002+HG003+HG004	NovaSeq	30	TRUE	GT	GATK4	alllowmapandsegdup	AAaaaa	FP	11438	0.133357
HG002+HG003+HG004	NovaSeq	30	TRUE	GT	GATK4	alllowmapandsegdup	AAAaaa	FN	27185	0.187223	0.0352529
HG002+HG003+HG004	NovaSeq	30	TRUE	GT	GATK4	alllowmapandsegdup	AAAaaa	FP	18733	0.21841
HG002+HG003+HG004	NovaSeq	30	TRUE	GT	GATK4	alllowmapandsegdup	AAAAaa	FN	37636	0.259199	0.0303884
HG002+HG003+HG004	NovaSeq	30	TRUE	GT	GATK4	alllowmapandsegdup	AAAAaa	FP	22882	0.266783
HG002+HG003+HG004	NovaSeq	30	TRUE	GT	GATK4	alllowmapandsegdup	AAAAAa	FN	33963	0.233903	0.0318815
HG002+HG003+HG004	NovaSeq	30	TRUE	GT	GATK4	alllowmapandsegdup	AAAAAa	FP	27032	0.315168
HG002+HG003+HG004	NovaSeq	30	TRUE	GT	FreeBayes	alllowmapandsegdup	aaaaaa	FN	7659	0.0587207	0.00937332
HG002+HG003+HG004	NovaSeq	30	TRUE	GT	FreeBayes	alllowmapandsegdup	aaaaaa	FP	510	0.00565354
HG002+HG003+HG004	NovaSeq	30	TRUE	GT	FreeBayes	alllowmapandsegdup	Aaaaaa	FN	11587	0.0888362	0.0282534
HG002+HG003+HG004	NovaSeq	30	TRUE	GT	FreeBayes	alllowmapandsegdup	Aaaaaa	FP	4552	0.0504606
HG002+HG003+HG004	NovaSeq	30	TRUE	GT	FreeBayes	alllowmapandsegdup	AAaaaa	FN	18219	0.139683	0.0305865
HG002+HG003+HG004	NovaSeq	30	TRUE	GT	FreeBayes	alllowmapandsegdup	AAaaaa	FP	12751	0.14135
HG002+HG003+HG004	NovaSeq	30	TRUE	GT	FreeBayes	alllowmapandsegdup	AAAaaa	FN	25336	0.194248	0.0328551
HG002+HG003+HG004	NovaSeq	30	TRUE	GT	FreeBayes	alllowmapandsegdup	AAAaaa	FP	21221	0.235243
HG002+HG003+HG004	NovaSeq	30	TRUE	GT	FreeBayes	alllowmapandsegdup	AAAAaa	FN	34940	0.267881	0.0282116
HG002+HG003+HG004	NovaSeq	30	TRUE	GT	FreeBayes	alllowmapandsegdup	AAAAaa	FP	26004	0.288264
HG002+HG003+HG004	NovaSeq	30	TRUE	GT	FreeBayes	alllowmapandsegdup	AAAAAa	FN	32690	0.250631	0.0306866
HG002+HG003+HG004	NovaSeq	30	TRUE	GT	FreeBayes	alllowmapandsegdup	AAAAAa	FP	25171	0.27903
HG002+HG003+HG004	NovaSeq	30	TRUE	GT	Octopus	notinalldifficult	aaaaaa	FN	10434	0.0144695	0.0127695
HG002+HG003+HG004	NovaSeq	30	TRUE	GT	Octopus	notinalldifficult	aaaaaa	FP	2468	0.00393262
HG002+HG003+HG004	NovaSeq	30	TRUE	GT	Octopus	notinalldifficult	Aaaaaa	FN	34761	0.0482055	0.0847602
HG002+HG003+HG004	NovaSeq	30	TRUE	GT	Octopus	notinalldifficult	Aaaaaa	FP	59210	0.0943477
HG002+HG003+HG004	NovaSeq	30	TRUE	GT	Octopus	notinalldifficult	AAaaaa	FN	108691	0.150729	0.182473
HG002+HG003+HG004	NovaSeq	30	TRUE	GT	Octopus	notinalldifficult	AAaaaa	FP	109182	0.173975
HG002+HG003+HG004	NovaSeq	30	TRUE	GT	Octopus	notinalldifficult	AAAaaa	FN	157349	0.218207	0.204046
HG002+HG003+HG004	NovaSeq	30	TRUE	GT	Octopus	notinalldifficult	AAAaaa	FP	182412	0.290663
HG002+HG003+HG004	NovaSeq	30	TRUE	GT	Octopus	notinalldifficult	AAAAaa	FN	235545	0.326646	0.190186
HG002+HG003+HG004	NovaSeq	30	TRUE	GT	Octopus	notinalldifficult	AAAAaa	FP	162217	0.258483
HG002+HG003+HG004	NovaSeq	30	TRUE	GT	Octopus	notinalldifficult	AAAAAa	FN	174321	0.241743	0.163638
HG002+HG003+HG004	NovaSeq	30	TRUE	GT	Octopus	notinalldifficult	AAAAAa	FP	112083	0.178598
HG002+HG003+HG004	NovaSeq	30	TRUE	GT	GATK4	notinalldifficult	aaaaaa	FN	12147	0.0121293	0.0148659
HG002+HG003+HG004	NovaSeq	30	TRUE	GT	GATK4	notinalldifficult	aaaaaa	FP	2416	0.00282483
HG002+HG003+HG004	NovaSeq	30	TRUE	GT	GATK4	notinalldifficult	Aaaaaa	FN	51982	0.0519062	0.126751
HG002+HG003+HG004	NovaSeq	30	TRUE	GT	GATK4	notinalldifficult	Aaaaaa	FP	78388	0.0916527
HG002+HG003+HG004	NovaSeq	30	TRUE	GT	GATK4	notinalldifficult	AAaaaa	FN	156278	0.15605	0.262364
HG002+HG003+HG004	NovaSeq	30	TRUE	GT	GATK4	notinalldifficult	AAaaaa	FP	150258	0.175684
HG002+HG003+HG004	NovaSeq	30	TRUE	GT	GATK4	notinalldifficult	AAAaaa	FN	222553	0.222229	0.288601
HG002+HG003+HG004	NovaSeq	30	TRUE	GT	GATK4	notinalldifficult	AAAaaa	FP	239208	0.279686
HG002+HG003+HG004	NovaSeq	30	TRUE	GT	GATK4	notinalldifficult	AAAAaa	FN	319612	0.319146	0.258064
HG002+HG003+HG004	NovaSeq	30	TRUE	GT	GATK4	notinalldifficult	AAAAaa	FP	222664	0.260343
HG002+HG003+HG004	NovaSeq	30	TRUE	GT	GATK4	notinalldifficult	AAAAAa	FN	238888	0.23854	0.224248
HG002+HG003+HG004	NovaSeq	30	TRUE	GT	GATK4	notinalldifficult	AAAAAa	FP	162338	0.189809
HG002+HG003+HG004	NovaSeq	30	TRUE	GT	FreeBayes	notinalldifficult	aaaaaa	FN	21297	0.0205176	0.0260639
HG002+HG003+HG004	NovaSeq	30	TRUE	GT	FreeBayes	notinalldifficult	aaaaaa	FP	3607	0.00409441
HG002+HG003+HG004	NovaSeq	30	TRUE	GT	FreeBayes	notinalldifficult	Aaaaaa	FN	75514	0.0727504	0.184131
HG002+HG003+HG004	NovaSeq	30	TRUE	GT	FreeBayes	notinalldifficult	Aaaaaa	FP	72702	0.0825262
HG002+HG003+HG004	NovaSeq	30	TRUE	GT	FreeBayes	notinalldifficult	AAaaaa	FN	158919	0.153103	0.266798
HG002+HG003+HG004	NovaSeq	30	TRUE	GT	FreeBayes	notinalldifficult	AAaaaa	FP	153069	0.173753
HG002+HG003+HG004	NovaSeq	30	TRUE	GT	FreeBayes	notinalldifficult	AAAaaa	FN	223356	0.215182	0.289643
HG002+HG003+HG004	NovaSeq	30	TRUE	GT	FreeBayes	notinalldifficult	AAAaaa	FP	245950	0.279185
HG002+HG003+HG004	NovaSeq	30	TRUE	GT	FreeBayes	notinalldifficult	AAAAaa	FN	325413	0.313504	0.262748
HG002+HG003+HG004	NovaSeq	30	TRUE	GT	FreeBayes	notinalldifficult	AAAAaa	FP	223554	0.253763
HG002+HG003+HG004	NovaSeq	30	TRUE	GT	FreeBayes	notinalldifficult	AAAAAa	FN	233488	0.224943	0.219178
HG002+HG003+HG004	NovaSeq	30	TRUE	GT	FreeBayes	notinalldifficult	AAAAAa	FP	182075	0.206679
HG002+HG003+HG004	NovaSeq	30	TRUE	GT	Octopus	notinalllowmapandsegdup	aaaaaa	FN	13613	0.0154399	0.01666
HG002+HG003+HG004	NovaSeq	30	TRUE	GT	Octopus	notinalllowmapandsegdup	aaaaaa	FP	4915	0.00631974
HG002+HG003+HG004	NovaSeq	30	TRUE	GT	Octopus	notinalllowmapandsegdup	Aaaaaa	FN	43182	0.0489772	0.105294
HG002+HG003+HG004	NovaSeq	30	TRUE	GT	Octopus	notinalllowmapandsegdup	Aaaaaa	FP	72569	0.0933097
HG002+HG003+HG004	NovaSeq	30	TRUE	GT	Octopus	notinalllowmapandsegdup	AAaaaa	FN	132170	0.149908	0.221891
HG002+HG003+HG004	NovaSeq	30	TRUE	GT	Octopus	notinalllowmapandsegdup	AAaaaa	FP	133870	0.172131
HG002+HG003+HG004	NovaSeq	30	TRUE	GT	Octopus	notinalllowmapandsegdup	AAAaaa	FN	190722	0.216318	0.247324
HG002+HG003+HG004	NovaSeq	30	TRUE	GT	Octopus	notinalllowmapandsegdup	AAAaaa	FP	223871	0.287855
HG002+HG003+HG004	NovaSeq	30	TRUE	GT	Octopus	notinalllowmapandsegdup	AAAAaa	FN	286814	0.325305	0.231582
HG002+HG003+HG004	NovaSeq	30	TRUE	GT	Octopus	notinalllowmapandsegdup	AAAAaa	FP	201104	0.258581
HG002+HG003+HG004	NovaSeq	30	TRUE	GT	Octopus	notinalllowmapandsegdup	AAAAAa	FN	215175	0.244052	0.201988
HG002+HG003+HG004	NovaSeq	30	TRUE	GT	Octopus	notinalllowmapandsegdup	AAAAAa	FP	141393	0.181804
HG002+HG003+HG004	NovaSeq	30	TRUE	GT	GATK4	notinalllowmapandsegdup	aaaaaa	FN	16555	0.0135292	0.0202605
HG002+HG003+HG004	NovaSeq	30	TRUE	GT	GATK4	notinalllowmapandsegdup	aaaaaa	FP	4398	0.00424796
HG002+HG003+HG004	NovaSeq	30	TRUE	GT	GATK4	notinalllowmapandsegdup	Aaaaaa	FN	63457	0.0518589	0.154732
HG002+HG003+HG004	NovaSeq	30	TRUE	GT	GATK4	notinalllowmapandsegdup	Aaaaaa	FP	95806	0.0925376
HG002+HG003+HG004	NovaSeq	30	TRUE	GT	GATK4	notinalllowmapandsegdup	AAaaaa	FN	188154	0.153765	0.315878
HG002+HG003+HG004	NovaSeq	30	TRUE	GT	GATK4	notinalllowmapandsegdup	AAaaaa	FP	180917	0.174745
HG002+HG003+HG004	NovaSeq	30	TRUE	GT	GATK4	notinalllowmapandsegdup	AAAaaa	FN	267758	0.21882	0.347222
HG002+HG003+HG004	NovaSeq	30	TRUE	GT	GATK4	notinalllowmapandsegdup	AAAaaa	FP	287818	0.277999
HG002+HG003+HG004	NovaSeq	30	TRUE	GT	GATK4	notinalllowmapandsegdup	AAAAaa	FN	387086	0.316338	0.312545
HG002+HG003+HG004	NovaSeq	30	TRUE	GT	GATK4	notinalllowmapandsegdup	AAAAaa	FP	269064	0.259885
HG002+HG003+HG004	NovaSeq	30	TRUE	GT	GATK4	notinalllowmapandsegdup	AAAAAa	FN	300637	0.245689	0.282212
HG002+HG003+HG004	NovaSeq	30	TRUE	GT	GATK4	notinalllowmapandsegdup	AAAAAa	FP	197317	0.190586
HG002+HG003+HG004	NovaSeq	30	TRUE	GT	FreeBayes	notinalllowmapandsegdup	aaaaaa	FN	35302	0.0273763	0.0432037
HG002+HG003+HG004	NovaSeq	30	TRUE	GT	FreeBayes	notinalllowmapandsegdup	aaaaaa	FP	5373	0.00517517
HG002+HG003+HG004	NovaSeq	30	TRUE	GT	FreeBayes	notinalllowmapandsegdup	Aaaaaa	FN	94234	0.0730773	0.229777
HG002+HG003+HG004	NovaSeq	30	TRUE	GT	FreeBayes	notinalllowmapandsegdup	Aaaaaa	FP	85566	0.0824155
HG002+HG003+HG004	NovaSeq	30	TRUE	GT	FreeBayes	notinalllowmapandsegdup	AAaaaa	FN	193428	0.150001	0.324732
HG002+HG003+HG004	NovaSeq	30	TRUE	GT	FreeBayes	notinalllowmapandsegdup	AAaaaa	FP	179755	0.173137
HG002+HG003+HG004	NovaSeq	30	TRUE	GT	FreeBayes	notinalllowmapandsegdup	AAAaaa	FN	271393	0.210462	0.351936
HG002+HG003+HG004	NovaSeq	30	TRUE	GT	FreeBayes	notinalllowmapandsegdup	AAAaaa	FP	288493	0.277871
HG002+HG003+HG004	NovaSeq	30	TRUE	GT	FreeBayes	notinalllowmapandsegdup	AAAAaa	FN	399284	0.30964	0.322394
HG002+HG003+HG004	NovaSeq	30	TRUE	GT	FreeBayes	notinalllowmapandsegdup	AAAAaa	FP	263200	0.253509
HG002+HG003+HG004	NovaSeq	30	TRUE	GT	FreeBayes	notinalllowmapandsegdup	AAAAAa	FN	295870	0.229444	0.277737
HG002+HG003+HG004	NovaSeq	30	TRUE	GT	FreeBayes	notinalllowmapandsegdup	AAAAAa	FP	215840	0.207893
HG002+HG003+HG004	NovaSeq	30	TRUE	GT	Octopus	AllTandemRepeatsandHomopolymers	aaaaaa	FN	2491	0.0225663	0.00304856
HG002+HG003+HG004	NovaSeq	30	TRUE	GT	Octopus	AllTandemRepeatsandHomopolymers	aaaaaa	FP	2259	0.0211353
HG002+HG003+HG004	NovaSeq	30	TRUE	GT	Octopus	AllTandemRepeatsandHomopolymers	Aaaaaa	FN	5961	0.0540014	0.0145351
HG002+HG003+HG004	NovaSeq	30	TRUE	GT	Octopus	AllTandemRepeatsandHomopolymers	Aaaaaa	FP	9221	0.0862719
HG002+HG003+HG004	NovaSeq	30	TRUE	GT	Octopus	AllTandemRepeatsandHomopolymers	AAaaaa	FN	15385	0.139375	0.0258288
HG002+HG003+HG004	NovaSeq	30	TRUE	GT	Octopus	AllTandemRepeatsandHomopolymers	AAaaaa	FP	17308	0.161934
HG002+HG003+HG004	NovaSeq	30	TRUE	GT	Octopus	AllTandemRepeatsandHomopolymers	AAAaaa	FN	22751	0.206104	0.029503
HG002+HG003+HG004	NovaSeq	30	TRUE	GT	Octopus	AllTandemRepeatsandHomopolymers	AAAaaa	FP	28581	0.267405
HG002+HG003+HG004	NovaSeq	30	TRUE	GT	Octopus	AllTandemRepeatsandHomopolymers	AAAAaa	FN	34744	0.31475	0.0280533
HG002+HG003+HG004	NovaSeq	30	TRUE	GT	Octopus	AllTandemRepeatsandHomopolymers	AAAAaa	FP	27968	0.261669
HG002+HG003+HG004	NovaSeq	30	TRUE	GT	Octopus	AllTandemRepeatsandHomopolymers	AAAAAa	FN	29054	0.263204	0.0272734
HG002+HG003+HG004	NovaSeq	30	TRUE	GT	Octopus	AllTandemRepeatsandHomopolymers	AAAAAa	FP	21546	0.201585
HG002+HG003+HG004	NovaSeq	30	TRUE	GT	GATK4	AllTandemRepeatsandHomopolymers	aaaaaa	FN	3605	0.0236587	0.00441191
HG002+HG003+HG004	NovaSeq	30	TRUE	GT	GATK4	AllTandemRepeatsandHomopolymers	aaaaaa	FP	1792	0.0150027
HG002+HG003+HG004	NovaSeq	30	TRUE	GT	GATK4	AllTandemRepeatsandHomopolymers	Aaaaaa	FN	7718	0.0506514	0.0188193
HG002+HG003+HG004	NovaSeq	30	TRUE	GT	GATK4	AllTandemRepeatsandHomopolymers	Aaaaaa	FP	11938	0.0999456
HG002+HG003+HG004	NovaSeq	30	TRUE	GT	GATK4	AllTandemRepeatsandHomopolymers	AAaaaa	FN	20550	0.134865	0.0344999
HG002+HG003+HG004	NovaSeq	30	TRUE	GT	GATK4	AllTandemRepeatsandHomopolymers	AAaaaa	FP	20381	0.170631
HG002+HG003+HG004	NovaSeq	30	TRUE	GT	GATK4	AllTandemRepeatsandHomopolymers	AAAaaa	FN	30175	0.198031	0.0391302
HG002+HG003+HG004	NovaSeq	30	TRUE	GT	GATK4	AllTandemRepeatsandHomopolymers	AAAaaa	FP	32020	0.268073
HG002+HG003+HG004	NovaSeq	30	TRUE	GT	GATK4	AllTandemRepeatsandHomopolymers	AAAAaa	FN	44945	0.294963	0.0362899
HG002+HG003+HG004	NovaSeq	30	TRUE	GT	GATK4	AllTandemRepeatsandHomopolymers	AAAAaa	FP	31068	0.260103
HG002+HG003+HG004	NovaSeq	30	TRUE	GT	GATK4	AllTandemRepeatsandHomopolymers	AAAAAa	FN	45382	0.297831	0.0426007
HG002+HG003+HG004	NovaSeq	30	TRUE	GT	GATK4	AllTandemRepeatsandHomopolymers	AAAAAa	FP	22246	0.186245
HG002+HG003+HG004	NovaSeq	30	TRUE	GT	FreeBayes	AllTandemRepeatsandHomopolymers	aaaaaa	FN	12090	0.0677288	0.0147961
HG002+HG003+HG004	NovaSeq	30	TRUE	GT	FreeBayes	AllTandemRepeatsandHomopolymers	aaaaaa	FP	2134	0.0189322
HG002+HG003+HG004	NovaSeq	30	TRUE	GT	FreeBayes	AllTandemRepeatsandHomopolymers	Aaaaaa	FN	13178	0.0738238	0.0321328
HG002+HG003+HG004	NovaSeq	30	TRUE	GT	FreeBayes	AllTandemRepeatsandHomopolymers	Aaaaaa	FP	9070	0.0804663
HG002+HG003+HG004	NovaSeq	30	TRUE	GT	FreeBayes	AllTandemRepeatsandHomopolymers	AAaaaa	FN	22991	0.128797	0.0385979
HG002+HG003+HG004	NovaSeq	30	TRUE	GT	FreeBayes	AllTandemRepeatsandHomopolymers	AAaaaa	FP	19177	0.170133
HG002+HG003+HG004	NovaSeq	30	TRUE	GT	FreeBayes	AllTandemRepeatsandHomopolymers	AAAaaa	FN	32937	0.184515	0.0427119
HG002+HG003+HG004	NovaSeq	30	TRUE	GT	FreeBayes	AllTandemRepeatsandHomopolymers	AAAaaa	FP	30256	0.268422
HG002+HG003+HG004	NovaSeq	30	TRUE	GT	FreeBayes	AllTandemRepeatsandHomopolymers	AAAAaa	FN	50980	0.285593	0.0411628
HG002+HG003+HG004	NovaSeq	30	TRUE	GT	FreeBayes	AllTandemRepeatsandHomopolymers	AAAAaa	FP	28932	0.256676
HG002+HG003+HG004	NovaSeq	30	TRUE	GT	FreeBayes	AllTandemRepeatsandHomopolymers	AAAAAa	FN	46330	0.259543	0.0434906
HG002+HG003+HG004	NovaSeq	30	TRUE	GT	FreeBayes	AllTandemRepeatsandHomopolymers	AAAAAa	FP	23149	0.205371
HG002+HG003+HG004	NovaSeq	30	TRUE	GT	Octopus	notinAllTandemRepeatsandHomopolymers	aaaaaa	FN	16308	0.0186675	0.0199582
HG002+HG003+HG004	NovaSeq	30	TRUE	GT	Octopus	notinAllTandemRepeatsandHomopolymers	aaaaaa	FP	3264	0.00438238
HG002+HG003+HG004	NovaSeq	30	TRUE	GT	Octopus	notinAllTandemRepeatsandHomopolymers	Aaaaaa	FN	44982	0.05149	0.109683
HG002+HG003+HG004	NovaSeq	30	TRUE	GT	Octopus	notinAllTandemRepeatsandHomopolymers	Aaaaaa	FP	67893	0.091156
HG002+HG003+HG004	NovaSeq	30	TRUE	GT	Octopus	notinAllTandemRepeatsandHomopolymers	AAaaaa	FN	131040	0.149999	0.219993
HG002+HG003+HG004	NovaSeq	30	TRUE	GT	Octopus	notinAllTandemRepeatsandHomopolymers	AAaaaa	FP	126493	0.169835
HG002+HG003+HG004	NovaSeq	30	TRUE	GT	Octopus	notinAllTandemRepeatsandHomopolymers	AAAaaa	FN	188150	0.215372	0.243988
HG002+HG003+HG004	NovaSeq	30	TRUE	GT	Octopus	notinAllTandemRepeatsandHomopolymers	AAAaaa	FP	212323	0.285074
HG002+HG003+HG004	NovaSeq	30	TRUE	GT	Octopus	notinAllTandemRepeatsandHomopolymers	AAAAaa	FN	279555	0.320001	0.225721
HG002+HG003+HG004	NovaSeq	30	TRUE	GT	Octopus	notinAllTandemRepeatsandHomopolymers	AAAAaa	FP	194733	0.261457
HG002+HG003+HG004	NovaSeq	30	TRUE	GT	Octopus	notinAllTandemRepeatsandHomopolymers	AAAAAa	FN	213571	0.244471	0.200482
HG002+HG003+HG004	NovaSeq	30	TRUE	GT	Octopus	notinAllTandemRepeatsandHomopolymers	AAAAAa	FP	140094	0.188096
HG002+HG003+HG004	NovaSeq	30	TRUE	GT	GATK4	notinAllTandemRepeatsandHomopolymers	aaaaaa	FN	29025	0.0238548	0.0355217
HG002+HG003+HG004	NovaSeq	30	TRUE	GT	GATK4	notinAllTandemRepeatsandHomopolymers	aaaaaa	FP	2912	0.00290665
HG002+HG003+HG004	NovaSeq	30	TRUE	GT	GATK4	notinAllTandemRepeatsandHomopolymers	Aaaaaa	FN	66680	0.0548024	0.162591
HG002+HG003+HG004	NovaSeq	30	TRUE	GT	GATK4	notinAllTandemRepeatsandHomopolymers	Aaaaaa	FP	89249	0.0890852
HG002+HG003+HG004	NovaSeq	30	TRUE	GT	GATK4	notinAllTandemRepeatsandHomopolymers	AAaaaa	FN	187047	0.153729	0.31402
HG002+HG003+HG004	NovaSeq	30	TRUE	GT	GATK4	notinAllTandemRepeatsandHomopolymers	AAaaaa	FP	172003	0.171687
HG002+HG003+HG004	NovaSeq	30	TRUE	GT	GATK4	notinAllTandemRepeatsandHomopolymers	AAAaaa	FN	264824	0.217652	0.343417
HG002+HG003+HG004	NovaSeq	30	TRUE	GT	GATK4	notinAllTandemRepeatsandHomopolymers	AAAaaa	FP	274593	0.274089
HG002+HG003+HG004	NovaSeq	30	TRUE	GT	GATK4	notinAllTandemRepeatsandHomopolymers	AAAAaa	FN	379882	0.312215	0.306728
HG002+HG003+HG004	NovaSeq	30	TRUE	GT	GATK4	notinAllTandemRepeatsandHomopolymers	AAAAaa	FP	260922	0.260443
HG002+HG003+HG004	NovaSeq	30	TRUE	GT	GATK4	notinAllTandemRepeatsandHomopolymers	AAAAAa	FN	289276	0.237748	0.271547
HG002+HG003+HG004	NovaSeq	30	TRUE	GT	GATK4	notinAllTandemRepeatsandHomopolymers	AAAAAa	FP	202160	0.201789
HG002+HG003+HG004	NovaSeq	30	TRUE	GT	FreeBayes	notinAllTandemRepeatsandHomopolymers	aaaaaa	FN	30854	0.0248472	0.0377601
HG002+HG003+HG004	NovaSeq	30	TRUE	GT	FreeBayes	notinAllTandemRepeatsandHomopolymers	aaaaaa	FP	4359	0.00421745
HG002+HG003+HG004	NovaSeq	30	TRUE	GT	FreeBayes	notinAllTandemRepeatsandHomopolymers	Aaaaaa	FN	92655	0.0746163	0.225927
HG002+HG003+HG004	NovaSeq	30	TRUE	GT	FreeBayes	notinAllTandemRepeatsandHomopolymers	Aaaaaa	FP	82423	0.0797464
HG002+HG003+HG004	NovaSeq	30	TRUE	GT	FreeBayes	notinAllTandemRepeatsandHomopolymers	AAaaaa	FN	188680	0.151947	0.316761
HG002+HG003+HG004	NovaSeq	30	TRUE	GT	FreeBayes	notinAllTandemRepeatsandHomopolymers	AAaaaa	FP	176319	0.170593
HG002+HG003+HG004	NovaSeq	30	TRUE	GT	FreeBayes	notinAllTandemRepeatsandHomopolymers	AAAaaa	FN	263849	0.212481	0.342153
HG002+HG003+HG004	NovaSeq	30	TRUE	GT	FreeBayes	notinAllTandemRepeatsandHomopolymers	AAAaaa	FP	284322	0.275089
HG002+HG003+HG004	NovaSeq	30	TRUE	GT	FreeBayes	notinAllTandemRepeatsandHomopolymers	AAAAaa	FN	383360	0.308725	0.309536
HG002+HG003+HG004	NovaSeq	30	TRUE	GT	FreeBayes	notinAllTandemRepeatsandHomopolymers	AAAAaa	FP	264997	0.256391
HG002+HG003+HG004	NovaSeq	30	TRUE	GT	FreeBayes	notinAllTandemRepeatsandHomopolymers	AAAAAa	FN	282354	0.227384	0.26505
HG002+HG003+HG004	NovaSeq	30	TRUE	GT	FreeBayes	notinAllTandemRepeatsandHomopolymers	AAAAAa	FP	221144	0.213963
HG002+HG003+HG004	NovaSeq	40	TRUE	GT	Octopus	genome	aaaaaa	FN	15198	0.022148	0.0185998
HG002+HG003+HG004	NovaSeq	40	TRUE	GT	Octopus	genome	aaaaaa	FP	2459	0.0038413
HG002+HG003+HG004	NovaSeq	40	TRUE	GT	Octopus	genome	Aaaaaa	FN	36896	0.0537685	0.0899661
HG002+HG003+HG004	NovaSeq	40	TRUE	GT	Octopus	genome	Aaaaaa	FP	54181	0.0846382
HG002+HG003+HG004	NovaSeq	40	TRUE	GT	Octopus	genome	AAaaaa	FN	108392	0.15796	0.181971
HG002+HG003+HG004	NovaSeq	40	TRUE	GT	Octopus	genome	AAaaaa	FP	106579	0.166491
HG002+HG003+HG004	NovaSeq	40	TRUE	GT	Octopus	genome	AAAaaa	FN	159763	0.232822	0.207177
HG002+HG003+HG004	NovaSeq	40	TRUE	GT	Octopus	genome	AAAaaa	FP	182083	0.284439
HG002+HG003+HG004	NovaSeq	40	TRUE	GT	Octopus	genome	AAAAaa	FN	232867	0.339357	0.188024
HG002+HG003+HG004	NovaSeq	40	TRUE	GT	Octopus	genome	AAAAaa	FP	167184	0.261165
HG002+HG003+HG004	NovaSeq	40	TRUE	GT	Octopus	genome	AAAAAa	FN	133085	0.193945	0.124929
HG002+HG003+HG004	NovaSeq	40	TRUE	GT	Octopus	genome	AAAAAa	FP	127662	0.199426
HG002+HG003+HG004	NovaSeq	40	TRUE	GT	GATK4	genome	aaaaaa	FN	28677	0.0262221	0.0350958
HG002+HG003+HG004	NovaSeq	40	TRUE	GT	GATK4	genome	aaaaaa	FP	1928	0.00212451
HG002+HG003+HG004	NovaSeq	40	TRUE	GT	GATK4	genome	Aaaaaa	FN	57512	0.0525887	0.140236
HG002+HG003+HG004	NovaSeq	40	TRUE	GT	GATK4	genome	Aaaaaa	FP	78736	0.0867611
HG002+HG003+HG004	NovaSeq	40	TRUE	GT	GATK4	genome	AAaaaa	FN	169411	0.154909	0.284412
HG002+HG003+HG004	NovaSeq	40	TRUE	GT	GATK4	genome	AAaaaa	FP	154394	0.170131
HG002+HG003+HG004	NovaSeq	40	TRUE	GT	GATK4	genome	AAAaaa	FN	243473	0.222631	0.31573
HG002+HG003+HG004	NovaSeq	40	TRUE	GT	GATK4	genome	AAAaaa	FP	253552	0.279395
HG002+HG003+HG004	NovaSeq	40	TRUE	GT	GATK4	genome	AAAAaa	FN	344231	0.314763	0.277942
HG002+HG003+HG004	NovaSeq	40	TRUE	GT	GATK4	genome	AAAAaa	FP	234339	0.258224
HG002+HG003+HG004	NovaSeq	40	TRUE	GT	GATK4	genome	AAAAAa	FN	250314	0.228886	0.234973
HG002+HG003+HG004	NovaSeq	40	TRUE	GT	GATK4	genome	AAAAAa	FP	184554	0.203365
HG002+HG003+HG004	NovaSeq	40	TRUE	GT	FreeBayes	genome	aaaaaa	FN	31607	0.0288749	0.0386816
HG002+HG003+HG004	NovaSeq	40	TRUE	GT	FreeBayes	genome	aaaaaa	FP	3235	0.00353322
HG002+HG003+HG004	NovaSeq	40	TRUE	GT	FreeBayes	genome	Aaaaaa	FN	77215	0.0705405	0.188279
HG002+HG003+HG004	NovaSeq	40	TRUE	GT	FreeBayes	genome	Aaaaaa	FP	67574	0.0738034
HG002+HG003+HG004	NovaSeq	40	TRUE	GT	FreeBayes	genome	AAaaaa	FN	171572	0.156741	0.28804
HG002+HG003+HG004	NovaSeq	40	TRUE	GT	FreeBayes	genome	AAaaaa	FP	158254	0.172843
HG002+HG003+HG004	NovaSeq	40	TRUE	GT	FreeBayes	genome	AAAaaa	FN	245957	0.224696	0.318951
HG002+HG003+HG004	NovaSeq	40	TRUE	GT	FreeBayes	genome	AAAaaa	FP	260711	0.284745
HG002+HG003+HG004	NovaSeq	40	TRUE	GT	FreeBayes	genome	AAAAaa	FN	347121	0.317116	0.280276
HG002+HG003+HG004	NovaSeq	40	TRUE	GT	FreeBayes	genome	AAAAaa	FP	243697	0.266162
HG002+HG003+HG004	NovaSeq	40	TRUE	GT	FreeBayes	genome	AAAAAa	FN	221147	0.202031	0.207594
HG002+HG003+HG004	NovaSeq	40	TRUE	GT	FreeBayes	genome	AAAAAa	FP	182124	0.198913
HG002+HG003+HG004	NovaSeq	40	TRUE	GT	Octopus	alldifficult	aaaaaa	FN	7346	0.0371643	0.00899027
HG002+HG003+HG004	NovaSeq	40	TRUE	GT	Octopus	alldifficult	aaaaaa	FP	1691	0.00932086
HG002+HG003+HG004	NovaSeq	40	TRUE	GT	Octopus	alldifficult	Aaaaaa	FN	12903	0.0652778	0.0314623
HG002+HG003+HG004	NovaSeq	40	TRUE	GT	Octopus	alldifficult	Aaaaaa	FP	12982	0.0715573
HG002+HG003+HG004	NovaSeq	40	TRUE	GT	Octopus	alldifficult	AAaaaa	FN	29928	0.151409	0.0502439
HG002+HG003+HG004	NovaSeq	40	TRUE	GT	Octopus	alldifficult	AAaaaa	FP	26651	0.146901
HG002+HG003+HG004	NovaSeq	40	TRUE	GT	Octopus	alldifficult	AAAaaa	FN	43012	0.217603	0.0557769
HG002+HG003+HG004	NovaSeq	40	TRUE	GT	Octopus	alldifficult	AAAaaa	FP	46139	0.25432
HG002+HG003+HG004	NovaSeq	40	TRUE	GT	Octopus	alldifficult	AAAAaa	FN	61606	0.311672	0.0497425
HG002+HG003+HG004	NovaSeq	40	TRUE	GT	Octopus	alldifficult	AAAAaa	FP	48635	0.268078
HG002+HG003+HG004	NovaSeq	40	TRUE	GT	Octopus	alldifficult	AAAAAa	FN	42868	0.216874	0.0402408
HG002+HG003+HG004	NovaSeq	40	TRUE	GT	Octopus	alldifficult	AAAAAa	FP	45323	0.249822
HG002+HG003+HG004	NovaSeq	40	TRUE	GT	GATK4	alldifficult	aaaaaa	FN	19565	0.0630003	0.0239443
HG002+HG003+HG004	NovaSeq	40	TRUE	GT	GATK4	alldifficult	aaaaaa	FP	1105	0.00496337
HG002+HG003+HG004	NovaSeq	40	TRUE	GT	GATK4	alldifficult	Aaaaaa	FN	19011	0.0612164	0.0463559
HG002+HG003+HG004	NovaSeq	40	TRUE	GT	GATK4	alldifficult	Aaaaaa	FP	17722	0.0796026
HG002+HG003+HG004	NovaSeq	40	TRUE	GT	GATK4	alldifficult	AAaaaa	FN	43897	0.141351	0.0736955
HG002+HG003+HG004	NovaSeq	40	TRUE	GT	GATK4	alldifficult	AAaaaa	FP	34719	0.155949
HG002+HG003+HG004	NovaSeq	40	TRUE	GT	GATK4	alldifficult	AAAaaa	FN	62388	0.200893	0.0809033
HG002+HG003+HG004	NovaSeq	40	TRUE	GT	GATK4	alldifficult	AAAaaa	FP	56934	0.255733
HG002+HG003+HG004	NovaSeq	40	TRUE	GT	GATK4	alldifficult	AAAAaa	FN	88524	0.285052	0.0714769
HG002+HG003+HG004	NovaSeq	40	TRUE	GT	GATK4	alldifficult	AAAAaa	FP	57831	0.259762
HG002+HG003+HG004	NovaSeq	40	TRUE	GT	GATK4	alldifficult	AAAAAa	FN	77169	0.248488	0.0724396
HG002+HG003+HG004	NovaSeq	40	TRUE	GT	GATK4	alldifficult	AAAAAa	FP	54320	0.243991
HG002+HG003+HG004	NovaSeq	40	TRUE	GT	FreeBayes	alldifficult	aaaaaa	FN	18238	0.0587877	0.0223202
HG002+HG003+HG004	NovaSeq	40	TRUE	GT	FreeBayes	alldifficult	aaaaaa	FP	1641	0.0072946
HG002+HG003+HG004	NovaSeq	40	TRUE	GT	FreeBayes	alldifficult	Aaaaaa	FN	24081	0.0776218	0.0587184
HG002+HG003+HG004	NovaSeq	40	TRUE	GT	FreeBayes	alldifficult	Aaaaaa	FP	14148	0.0628909
HG002+HG003+HG004	NovaSeq	40	TRUE	GT	FreeBayes	alldifficult	AAaaaa	FN	44941	0.144861	0.0754482
HG002+HG003+HG004	NovaSeq	40	TRUE	GT	FreeBayes	alldifficult	AAaaaa	FP	35423	0.157463
HG002+HG003+HG004	NovaSeq	40	TRUE	GT	FreeBayes	alldifficult	AAAaaa	FN	63401	0.204364	0.0822169
HG002+HG003+HG004	NovaSeq	40	TRUE	GT	FreeBayes	alldifficult	AAAaaa	FP	58627	0.26061
HG002+HG003+HG004	NovaSeq	40	TRUE	GT	FreeBayes	alldifficult	AAAAaa	FN	90294	0.29105	0.0729061
HG002+HG003+HG004	NovaSeq	40	TRUE	GT	FreeBayes	alldifficult	AAAAaa	FP	61407	0.272967
HG002+HG003+HG004	NovaSeq	40	TRUE	GT	FreeBayes	alldifficult	AAAAAa	FN	69280	0.223315	0.0650341
HG002+HG003+HG004	NovaSeq	40	TRUE	GT	FreeBayes	alldifficult	AAAAAa	FP	53715	0.238775
HG002+HG003+HG004	NovaSeq	40	TRUE	GT	Octopus	alllowmapandsegdup	aaaaaa	FN	4919	0.0592066	0.00602003
HG002+HG003+HG004	NovaSeq	40	TRUE	GT	Octopus	alllowmapandsegdup	aaaaaa	FP	300	0.00447441
HG002+HG003+HG004	NovaSeq	40	TRUE	GT	Octopus	alllowmapandsegdup	Aaaaaa	FN	6836	0.0822802	0.0166687
HG002+HG003+HG004	NovaSeq	40	TRUE	GT	Octopus	alllowmapandsegdup	Aaaaaa	FP	3503	0.0522462
HG002+HG003+HG004	NovaSeq	40	TRUE	GT	Octopus	alllowmapandsegdup	AAaaaa	FN	12288	0.147902	0.0206294
HG002+HG003+HG004	NovaSeq	40	TRUE	GT	Octopus	alllowmapandsegdup	AAaaaa	FP	7870	0.117379
HG002+HG003+HG004	NovaSeq	40	TRUE	GT	Octopus	alllowmapandsegdup	AAAaaa	FN	17202	0.207048	0.0223071
HG002+HG003+HG004	NovaSeq	40	TRUE	GT	Octopus	alllowmapandsegdup	AAAaaa	FP	14174	0.211401
HG002+HG003+HG004	NovaSeq	40	TRUE	GT	Octopus	alllowmapandsegdup	AAAAaa	FN	22975	0.276534	0.0185507
HG002+HG003+HG004	NovaSeq	40	TRUE	GT	Octopus	alllowmapandsegdup	AAAAaa	FP	19059	0.284259
HG002+HG003+HG004	NovaSeq	40	TRUE	GT	Octopus	alllowmapandsegdup	AAAAAa	FN	18862	0.227029	0.017706
HG002+HG003+HG004	NovaSeq	40	TRUE	GT	Octopus	alllowmapandsegdup	AAAAAa	FP	22142	0.330241
HG002+HG003+HG004	NovaSeq	40	TRUE	GT	GATK4	alllowmapandsegdup	aaaaaa	FN	16027	0.122241	0.0196143
HG002+HG003+HG004	NovaSeq	40	TRUE	GT	GATK4	alllowmapandsegdup	aaaaaa	FP	121	0.00160706
HG002+HG003+HG004	NovaSeq	40	TRUE	GT	GATK4	alllowmapandsegdup	Aaaaaa	FN	10009	0.0763405	0.0244056
HG002+HG003+HG004	NovaSeq	40	TRUE	GT	GATK4	alllowmapandsegdup	Aaaaaa	FP	4382	0.0581993
HG002+HG003+HG004	NovaSeq	40	TRUE	GT	GATK4	alllowmapandsegdup	AAaaaa	FN	17658	0.134681	0.0296447
HG002+HG003+HG004	NovaSeq	40	TRUE	GT	GATK4	alllowmapandsegdup	AAaaaa	FP	9633	0.12794
HG002+HG003+HG004	NovaSeq	40	TRUE	GT	GATK4	alllowmapandsegdup	AAAaaa	FN	24705	0.18843	0.0320369
HG002+HG003+HG004	NovaSeq	40	TRUE	GT	GATK4	alllowmapandsegdup	AAAaaa	FP	16362	0.217311
HG002+HG003+HG004	NovaSeq	40	TRUE	GT	GATK4	alllowmapandsegdup	AAAAaa	FN	33709	0.257105	0.0272176
HG002+HG003+HG004	NovaSeq	40	TRUE	GT	GATK4	alllowmapandsegdup	AAAAaa	FP	19967	0.265191
HG002+HG003+HG004	NovaSeq	40	TRUE	GT	GATK4	alllowmapandsegdup	AAAAAa	FN	29002	0.221204	0.0272246
HG002+HG003+HG004	NovaSeq	40	TRUE	GT	GATK4	alllowmapandsegdup	AAAAAa	FP	24828	0.329752
HG002+HG003+HG004	NovaSeq	40	TRUE	GT	FreeBayes	alllowmapandsegdup	aaaaaa	FN	6883	0.0621501	0.00842363
HG002+HG003+HG004	NovaSeq	40	TRUE	GT	FreeBayes	alllowmapandsegdup	aaaaaa	FP	310	0.00377648
HG002+HG003+HG004	NovaSeq	40	TRUE	GT	FreeBayes	alllowmapandsegdup	Aaaaaa	FN	9953	0.0898707	0.0242691
HG002+HG003+HG004	NovaSeq	40	TRUE	GT	FreeBayes	alllowmapandsegdup	Aaaaaa	FP	3434	0.0418337
HG002+HG003+HG004	NovaSeq	40	TRUE	GT	FreeBayes	alllowmapandsegdup	AAaaaa	FN	16252	0.146748	0.0272843
HG002+HG003+HG004	NovaSeq	40	TRUE	GT	FreeBayes	alllowmapandsegdup	AAaaaa	FP	11090	0.135101
HG002+HG003+HG004	NovaSeq	40	TRUE	GT	FreeBayes	alllowmapandsegdup	AAAaaa	FN	22662	0.204627	0.0293875
HG002+HG003+HG004	NovaSeq	40	TRUE	GT	FreeBayes	alllowmapandsegdup	AAAaaa	FP	18870	0.229878
HG002+HG003+HG004	NovaSeq	40	TRUE	GT	FreeBayes	alllowmapandsegdup	AAAAaa	FN	30024	0.271102	0.0242423
HG002+HG003+HG004	NovaSeq	40	TRUE	GT	FreeBayes	alllowmapandsegdup	AAAAaa	FP	23972	0.292032
HG002+HG003+HG004	NovaSeq	40	TRUE	GT	FreeBayes	alllowmapandsegdup	AAAAAa	FN	24974	0.225503	0.0234434
HG002+HG003+HG004	NovaSeq	40	TRUE	GT	FreeBayes	alllowmapandsegdup	AAAAAa	FP	24411	0.29738
HG002+HG003+HG004	NovaSeq	40	TRUE	GT	Octopus	notinalldifficult	aaaaaa	FN	7852	0.0160695	0.00960952
HG002+HG003+HG004	NovaSeq	40	TRUE	GT	Octopus	notinalldifficult	aaaaaa	FP	770	0.00167823
HG002+HG003+HG004	NovaSeq	40	TRUE	GT	Octopus	notinalldifficult	Aaaaaa	FN	23994	0.0491048	0.0585063
HG002+HG003+HG004	NovaSeq	40	TRUE	GT	Octopus	notinalldifficult	Aaaaaa	FP	41194	0.0897831
HG002+HG003+HG004	NovaSeq	40	TRUE	GT	Octopus	notinalldifficult	AAaaaa	FN	78467	0.160586	0.131733
HG002+HG003+HG004	NovaSeq	40	TRUE	GT	Octopus	notinalldifficult	AAaaaa	FP	79929	0.174207
HG002+HG003+HG004	NovaSeq	40	TRUE	GT	Octopus	notinalldifficult	AAAaaa	FN	116778	0.238992	0.151435
HG002+HG003+HG004	NovaSeq	40	TRUE	GT	Octopus	notinalldifficult	AAAaaa	FP	135954	0.296314
HG002+HG003+HG004	NovaSeq	40	TRUE	GT	Octopus	notinalldifficult	AAAAaa	FN	171301	0.350575	0.138314
HG002+HG003+HG004	NovaSeq	40	TRUE	GT	Octopus	notinalldifficult	AAAAaa	FP	118569	0.258423
HG002+HG003+HG004	NovaSeq	40	TRUE	GT	Octopus	notinalldifficult	AAAAAa	FN	90236	0.184672	0.0847058
HG002+HG003+HG004	NovaSeq	40	TRUE	GT	Octopus	notinalldifficult	AAAAAa	FP	82401	0.179594
HG002+HG003+HG004	NovaSeq	40	TRUE	GT	GATK4	notinalldifficult	aaaaaa	FN	9111	0.0116332	0.0111503
HG002+HG003+HG004	NovaSeq	40	TRUE	GT	GATK4	notinalldifficult	aaaaaa	FP	823	0.0012015
HG002+HG003+HG004	NovaSeq	40	TRUE	GT	GATK4	notinalldifficult	Aaaaaa	FN	38499	0.0491567	0.0938748
HG002+HG003+HG004	NovaSeq	40	TRUE	GT	GATK4	notinalldifficult	Aaaaaa	FP	61014	0.0890744
HG002+HG003+HG004	NovaSeq	40	TRUE	GT	GATK4	notinalldifficult	AAaaaa	FN	125517	0.160264	0.210721
HG002+HG003+HG004	NovaSeq	40	TRUE	GT	GATK4	notinalldifficult	AAaaaa	FP	119681	0.174722
HG002+HG003+HG004	NovaSeq	40	TRUE	GT	GATK4	notinalldifficult	AAAaaa	FN	181125	0.231266	0.234879
HG002+HG003+HG004	NovaSeq	40	TRUE	GT	GATK4	notinalldifficult	AAAaaa	FP	196640	0.287075
HG002+HG003+HG004	NovaSeq	40	TRUE	GT	GATK4	notinalldifficult	AAAAaa	FN	255763	0.326566	0.206511
HG002+HG003+HG004	NovaSeq	40	TRUE	GT	GATK4	notinalldifficult	AAAAaa	FP	176550	0.257746
HG002+HG003+HG004	NovaSeq	40	TRUE	GT	GATK4	notinalldifficult	AAAAAa	FN	173175	0.221115	0.162562
HG002+HG003+HG004	NovaSeq	40	TRUE	GT	GATK4	notinalldifficult	AAAAAa	FP	130270	0.190181
HG002+HG003+HG004	NovaSeq	40	TRUE	GT	FreeBayes	notinalldifficult	aaaaaa	FN	13341	0.017005	0.0163271
HG002+HG003+HG004	NovaSeq	40	TRUE	GT	FreeBayes	notinalldifficult	aaaaaa	FP	1924	0.00273382
HG002+HG003+HG004	NovaSeq	40	TRUE	GT	FreeBayes	notinalldifficult	Aaaaaa	FN	53133	0.0677254	0.129558
HG002+HG003+HG004	NovaSeq	40	TRUE	GT	FreeBayes	notinalldifficult	Aaaaaa	FP	54386	0.0772772
HG002+HG003+HG004	NovaSeq	40	TRUE	GT	FreeBayes	notinalldifficult	AAaaaa	FN	126629	0.161406	0.212588
HG002+HG003+HG004	NovaSeq	40	TRUE	GT	FreeBayes	notinalldifficult	AAaaaa	FP	124971	0.177572
HG002+HG003+HG004	NovaSeq	40	TRUE	GT	FreeBayes	notinalldifficult	AAAaaa	FN	182590	0.232736	0.236778
HG002+HG003+HG004	NovaSeq	40	TRUE	GT	FreeBayes	notinalldifficult	AAAaaa	FP	205662	0.292226
HG002+HG003+HG004	NovaSeq	40	TRUE	GT	FreeBayes	notinalldifficult	AAAAaa	FN	256891	0.327443	0.207421
HG002+HG003+HG004	NovaSeq	40	TRUE	GT	FreeBayes	notinalldifficult	AAAAaa	FP	185955	0.264224
HG002+HG003+HG004	NovaSeq	40	TRUE	GT	FreeBayes	notinalldifficult	AAAAAa	FN	151952	0.193684	0.142639
HG002+HG003+HG004	NovaSeq	40	TRUE	GT	FreeBayes	notinalldifficult	AAAAAa	FP	130880	0.185968
HG002+HG003+HG004	NovaSeq	40	TRUE	GT	Octopus	notinalllowmapandsegdup	aaaaaa	FN	10278	0.0170419	0.0125785
HG002+HG003+HG004	NovaSeq	40	TRUE	GT	Octopus	notinalllowmapandsegdup	aaaaaa	FP	2159	0.00376724
HG002+HG003+HG004	NovaSeq	40	TRUE	GT	Octopus	notinalllowmapandsegdup	Aaaaaa	FN	30060	0.0498424	0.0732974
HG002+HG003+HG004	NovaSeq	40	TRUE	GT	Octopus	notinalllowmapandsegdup	Aaaaaa	FP	50673	0.0884194
HG002+HG003+HG004	NovaSeq	40	TRUE	GT	Octopus	notinalllowmapandsegdup	AAaaaa	FN	96095	0.159335	0.161327
HG002+HG003+HG004	NovaSeq	40	TRUE	GT	Octopus	notinalllowmapandsegdup	AAaaaa	FP	98704	0.172229
HG002+HG003+HG004	NovaSeq	40	TRUE	GT	Octopus	notinalllowmapandsegdup	AAAaaa	FN	142555	0.23637	0.184862
HG002+HG003+HG004	NovaSeq	40	TRUE	GT	Octopus	notinalllowmapandsegdup	AAAaaa	FP	167900	0.292969
HG002+HG003+HG004	NovaSeq	40	TRUE	GT	Octopus	notinalllowmapandsegdup	AAAAaa	FN	209887	0.348013	0.169469
HG002+HG003+HG004	NovaSeq	40	TRUE	GT	Octopus	notinalllowmapandsegdup	AAAAaa	FP	148122	0.258458
HG002+HG003+HG004	NovaSeq	40	TRUE	GT	Octopus	notinalllowmapandsegdup	AAAAAa	FN	114226	0.189398	0.107226
HG002+HG003+HG004	NovaSeq	40	TRUE	GT	Octopus	notinalllowmapandsegdup	AAAAAa	FP	105540	0.184157
HG002+HG003+HG004	NovaSeq	40	TRUE	GT	GATK4	notinalllowmapandsegdup	aaaaaa	FN	12646	0.0131392	0.0154766
HG002+HG003+HG004	NovaSeq	40	TRUE	GT	GATK4	notinalllowmapandsegdup	aaaaaa	FP	1806	0.00217022
HG002+HG003+HG004	NovaSeq	40	TRUE	GT	GATK4	notinalllowmapandsegdup	Aaaaaa	FN	47496	0.0493482	0.115813
HG002+HG003+HG004	NovaSeq	40	TRUE	GT	GATK4	notinalllowmapandsegdup	Aaaaaa	FP	74351	0.0893457
HG002+HG003+HG004	NovaSeq	40	TRUE	GT	GATK4	notinalllowmapandsegdup	AAaaaa	FN	151741	0.157659	0.254747
HG002+HG003+HG004	NovaSeq	40	TRUE	GT	GATK4	notinalllowmapandsegdup	AAaaaa	FP	144749	0.173941
HG002+HG003+HG004	NovaSeq	40	TRUE	GT	GATK4	notinalllowmapandsegdup	AAAaaa	FN	218758	0.227289	0.28368
HG002+HG003+HG004	NovaSeq	40	TRUE	GT	GATK4	notinalllowmapandsegdup	AAAaaa	FP	237178	0.285011
HG002+HG003+HG004	NovaSeq	40	TRUE	GT	GATK4	notinalllowmapandsegdup	AAAAaa	FN	310514	0.322623	0.250718
HG002+HG003+HG004	NovaSeq	40	TRUE	GT	GATK4	notinalllowmapandsegdup	AAAAaa	FP	214367	0.257599
HG002+HG003+HG004	NovaSeq	40	TRUE	GT	GATK4	notinalllowmapandsegdup	AAAAAa	FN	221311	0.229942	0.207748
HG002+HG003+HG004	NovaSeq	40	TRUE	GT	GATK4	notinalllowmapandsegdup	AAAAAa	FP	159721	0.191933
HG002+HG003+HG004	NovaSeq	40	TRUE	GT	FreeBayes	notinalllowmapandsegdup	aaaaaa	FN	24711	0.0251175	0.0302421
HG002+HG003+HG004	NovaSeq	40	TRUE	GT	FreeBayes	notinalllowmapandsegdup	aaaaaa	FP	2931	0.00351503
HG002+HG003+HG004	NovaSeq	40	TRUE	GT	FreeBayes	notinalllowmapandsegdup	Aaaaaa	FN	67254	0.0683604	0.16399
HG002+HG003+HG004	NovaSeq	40	TRUE	GT	FreeBayes	notinalllowmapandsegdup	Aaaaaa	FP	64159	0.0769434
HG002+HG003+HG004	NovaSeq	40	TRUE	GT	FreeBayes	notinalllowmapandsegdup	AAaaaa	FN	155300	0.157855	0.260722
HG002+HG003+HG004	NovaSeq	40	TRUE	GT	FreeBayes	notinalllowmapandsegdup	AAaaaa	FP	147213	0.176547
HG002+HG003+HG004	NovaSeq	40	TRUE	GT	FreeBayes	notinalllowmapandsegdup	AAAaaa	FN	223283	0.226956	0.289548
HG002+HG003+HG004	NovaSeq	40	TRUE	GT	FreeBayes	notinalllowmapandsegdup	AAAaaa	FP	241941	0.29015
HG002+HG003+HG004	NovaSeq	40	TRUE	GT	FreeBayes	notinalllowmapandsegdup	AAAAaa	FN	317089	0.322306	0.256027
HG002+HG003+HG004	NovaSeq	40	TRUE	GT	FreeBayes	notinalllowmapandsegdup	AAAAaa	FP	219817	0.263618
HG002+HG003+HG004	NovaSeq	40	TRUE	GT	FreeBayes	notinalllowmapandsegdup	AAAAAa	FN	196178	0.199405	0.184155
HG002+HG003+HG004	NovaSeq	40	TRUE	GT	FreeBayes	notinalllowmapandsegdup	AAAAAa	FP	157786	0.189227
HG002+HG003+HG004	NovaSeq	40	TRUE	GT	Octopus	AllTandemRepeatsandHomopolymers	aaaaaa	FN	1877	0.0234631	0.00229713
HG002+HG003+HG004	NovaSeq	40	TRUE	GT	Octopus	AllTandemRepeatsandHomopolymers	aaaaaa	FP	1306	0.0158678
HG002+HG003+HG004	NovaSeq	40	TRUE	GT	Octopus	AllTandemRepeatsandHomopolymers	Aaaaaa	FN	4256	0.0532013	0.0103777
HG002+HG003+HG004	NovaSeq	40	TRUE	GT	Octopus	AllTandemRepeatsandHomopolymers	Aaaaaa	FP	6567	0.0797886
HG002+HG003+HG004	NovaSeq	40	TRUE	GT	Octopus	AllTandemRepeatsandHomopolymers	AAaaaa	FN	11583	0.144791	0.0194459
HG002+HG003+HG004	NovaSeq	40	TRUE	GT	Octopus	AllTandemRepeatsandHomopolymers	AAaaaa	FP	13301	0.161606
HG002+HG003+HG004	NovaSeq	40	TRUE	GT	Octopus	AllTandemRepeatsandHomopolymers	AAAaaa	FN	17867	0.223343	0.0231695
HG002+HG003+HG004	NovaSeq	40	TRUE	GT	Octopus	AllTandemRepeatsandHomopolymers	AAAaaa	FP	22195	0.269668
HG002+HG003+HG004	NovaSeq	40	TRUE	GT	Octopus	AllTandemRepeatsandHomopolymers	AAAAaa	FN	26569	0.332121	0.0214526
HG002+HG003+HG004	NovaSeq	40	TRUE	GT	Octopus	AllTandemRepeatsandHomopolymers	AAAAaa	FP	21431	0.260385
HG002+HG003+HG004	NovaSeq	40	TRUE	GT	Octopus	AllTandemRepeatsandHomopolymers	AAAAAa	FN	17846	0.223081	0.0167523
HG002+HG003+HG004	NovaSeq	40	TRUE	GT	Octopus	AllTandemRepeatsandHomopolymers	AAAAAa	FP	17505	0.212685
HG002+HG003+HG004	NovaSeq	40	TRUE	GT	GATK4	AllTandemRepeatsandHomopolymers	aaaaaa	FN	2959	0.0238585	0.00362132
HG002+HG003+HG004	NovaSeq	40	TRUE	GT	GATK4	AllTandemRepeatsandHomopolymers	aaaaaa	FP	892	0.00913663
HG002+HG003+HG004	NovaSeq	40	TRUE	GT	GATK4	AllTandemRepeatsandHomopolymers	Aaaaaa	FN	6086	0.0490715	0.0148399
HG002+HG003+HG004	NovaSeq	40	TRUE	GT	GATK4	AllTandemRepeatsandHomopolymers	Aaaaaa	FP	9158	0.0938041
HG002+HG003+HG004	NovaSeq	40	TRUE	GT	GATK4	AllTandemRepeatsandHomopolymers	AAaaaa	FN	16923	0.13645	0.0284108
HG002+HG003+HG004	NovaSeq	40	TRUE	GT	GATK4	AllTandemRepeatsandHomopolymers	AAaaaa	FP	16732	0.171384
HG002+HG003+HG004	NovaSeq	40	TRUE	GT	GATK4	AllTandemRepeatsandHomopolymers	AAAaaa	FN	25312	0.204091	0.032824
HG002+HG003+HG004	NovaSeq	40	TRUE	GT	GATK4	AllTandemRepeatsandHomopolymers	AAAaaa	FP	26622	0.272685
HG002+HG003+HG004	NovaSeq	40	TRUE	GT	GATK4	AllTandemRepeatsandHomopolymers	AAAAaa	FN	36600	0.295107	0.0295519
HG002+HG003+HG004	NovaSeq	40	TRUE	GT	GATK4	AllTandemRepeatsandHomopolymers	AAAAaa	FP	25485	0.261039
HG002+HG003+HG004	NovaSeq	40	TRUE	GT	GATK4	AllTandemRepeatsandHomopolymers	AAAAAa	FN	36143	0.291422	0.0339279
HG002+HG003+HG004	NovaSeq	40	TRUE	GT	GATK4	AllTandemRepeatsandHomopolymers	AAAAAa	FP	18740	0.191951
HG002+HG003+HG004	NovaSeq	40	TRUE	GT	FreeBayes	AllTandemRepeatsandHomopolymers	aaaaaa	FN	9974	0.0694926	0.0122065
HG002+HG003+HG004	NovaSeq	40	TRUE	GT	FreeBayes	AllTandemRepeatsandHomopolymers	aaaaaa	FP	1209	0.0128831
HG002+HG003+HG004	NovaSeq	40	TRUE	GT	FreeBayes	AllTandemRepeatsandHomopolymers	Aaaaaa	FN	10135	0.0706144	0.0247129
HG002+HG003+HG004	NovaSeq	40	TRUE	GT	FreeBayes	AllTandemRepeatsandHomopolymers	Aaaaaa	FP	6926	0.0738033
HG002+HG003+HG004	NovaSeq	40	TRUE	GT	FreeBayes	AllTandemRepeatsandHomopolymers	AAaaaa	FN	19287	0.13438	0.0323795
HG002+HG003+HG004	NovaSeq	40	TRUE	GT	FreeBayes	AllTandemRepeatsandHomopolymers	AAaaaa	FP	15870	0.16911
HG002+HG003+HG004	NovaSeq	40	TRUE	GT	FreeBayes	AllTandemRepeatsandHomopolymers	AAAaaa	FN	28325	0.197351	0.0367312
HG002+HG003+HG004	NovaSeq	40	TRUE	GT	FreeBayes	AllTandemRepeatsandHomopolymers	AAAaaa	FP	25552	0.272282
HG002+HG003+HG004	NovaSeq	40	TRUE	GT	FreeBayes	AllTandemRepeatsandHomopolymers	AAAAaa	FN	41988	0.292546	0.0339024
HG002+HG003+HG004	NovaSeq	40	TRUE	GT	FreeBayes	AllTandemRepeatsandHomopolymers	AAAAaa	FP	25055	0.266986
HG002+HG003+HG004	NovaSeq	40	TRUE	GT	FreeBayes	AllTandemRepeatsandHomopolymers	AAAAAa	FN	33817	0.235616	0.0317445
HG002+HG003+HG004	NovaSeq	40	TRUE	GT	FreeBayes	AllTandemRepeatsandHomopolymers	AAAAAa	FP	19232	0.204936
HG002+HG003+HG004	NovaSeq	40	TRUE	GT	Octopus	notinAllTandemRepeatsandHomopolymers	aaaaaa	FN	13321	0.0219698	0.0163027
HG002+HG003+HG004	NovaSeq	40	TRUE	GT	Octopus	notinAllTandemRepeatsandHomopolymers	aaaaaa	FP	1155	0.00207006
HG002+HG003+HG004	NovaSeq	40	TRUE	GT	Octopus	notinAllTandemRepeatsandHomopolymers	Aaaaaa	FN	32643	0.0538369	0.0795957
HG002+HG003+HG004	NovaSeq	40	TRUE	GT	Octopus	notinAllTandemRepeatsandHomopolymers	Aaaaaa	FP	47615	0.0853386
HG002+HG003+HG004	NovaSeq	40	TRUE	GT	Octopus	notinAllTandemRepeatsandHomopolymers	AAaaaa	FN	96821	0.159683	0.162546
HG002+HG003+HG004	NovaSeq	40	TRUE	GT	Octopus	notinAllTandemRepeatsandHomopolymers	AAaaaa	FP	93282	0.167186
HG002+HG003+HG004	NovaSeq	40	TRUE	GT	Octopus	notinAllTandemRepeatsandHomopolymers	AAAaaa	FN	141927	0.234075	0.184048
HG002+HG003+HG004	NovaSeq	40	TRUE	GT	Octopus	notinAllTandemRepeatsandHomopolymers	AAAaaa	FP	159906	0.286594
HG002+HG003+HG004	NovaSeq	40	TRUE	GT	Octopus	notinAllTandemRepeatsandHomopolymers	AAAAaa	FN	206354	0.340332	0.166616
HG002+HG003+HG004	NovaSeq	40	TRUE	GT	Octopus	notinAllTandemRepeatsandHomopolymers	AAAAaa	FP	145776	0.261269
HG002+HG003+HG004	NovaSeq	40	TRUE	GT	Octopus	notinAllTandemRepeatsandHomopolymers	AAAAAa	FN	115265	0.190102	0.108201
HG002+HG003+HG004	NovaSeq	40	TRUE	GT	Octopus	notinAllTandemRepeatsandHomopolymers	AAAAAa	FP	110220	0.197543
HG002+HG003+HG004	NovaSeq	40	TRUE	GT	GATK4	notinAllTandemRepeatsandHomopolymers	aaaaaa	FN	25720	0.0265216	0.0314769
HG002+HG003+HG004	NovaSeq	40	TRUE	GT	GATK4	notinAllTandemRepeatsandHomopolymers	aaaaaa	FP	1037	0.00128022
HG002+HG003+HG004	NovaSeq	40	TRUE	GT	GATK4	notinAllTandemRepeatsandHomopolymers	Aaaaaa	FN	51432	0.053035	0.12541
HG002+HG003+HG004	NovaSeq	40	TRUE	GT	GATK4	notinAllTandemRepeatsandHomopolymers	Aaaaaa	FP	69579	0.0858979
HG002+HG003+HG004	NovaSeq	40	TRUE	GT	GATK4	notinAllTandemRepeatsandHomopolymers	AAaaaa	FN	152500	0.157253	0.256021
HG002+HG003+HG004	NovaSeq	40	TRUE	GT	GATK4	notinAllTandemRepeatsandHomopolymers	AAaaaa	FP	137678	0.169969
HG002+HG003+HG004	NovaSeq	40	TRUE	GT	GATK4	notinAllTandemRepeatsandHomopolymers	AAAaaa	FN	218207	0.225008	0.282966
HG002+HG003+HG004	NovaSeq	40	TRUE	GT	GATK4	notinAllTandemRepeatsandHomopolymers	AAAaaa	FP	226965	0.280197
HG002+HG003+HG004	NovaSeq	40	TRUE	GT	GATK4	notinAllTandemRepeatsandHomopolymers	AAAAaa	FN	307708	0.317298	0.248453
HG002+HG003+HG004	NovaSeq	40	TRUE	GT	GATK4	notinAllTandemRepeatsandHomopolymers	AAAAaa	FP	208895	0.257889
HG002+HG003+HG004	NovaSeq	40	TRUE	GT	GATK4	notinAllTandemRepeatsandHomopolymers	AAAAAa	FN	214208	0.220884	0.20108
HG002+HG003+HG004	NovaSeq	40	TRUE	GT	GATK4	notinAllTandemRepeatsandHomopolymers	AAAAAa	FP	165866	0.204768
HG002+HG003+HG004	NovaSeq	40	TRUE	GT	FreeBayes	notinAllTandemRepeatsandHomopolymers	aaaaaa	FN	21612	0.0227183	0.0264494
HG002+HG003+HG004	NovaSeq	40	TRUE	GT	FreeBayes	notinAllTandemRepeatsandHomopolymers	aaaaaa	FP	2371	0.00283594
HG002+HG003+HG004	NovaSeq	40	TRUE	GT	FreeBayes	notinAllTandemRepeatsandHomopolymers	Aaaaaa	FN	67082	0.0705159	0.163571
HG002+HG003+HG004	NovaSeq	40	TRUE	GT	FreeBayes	notinAllTandemRepeatsandHomopolymers	Aaaaaa	FP	61690	0.073787
HG002+HG003+HG004	NovaSeq	40	TRUE	GT	FreeBayes	notinAllTandemRepeatsandHomopolymers	AAaaaa	FN	152296	0.160092	0.255679
HG002+HG003+HG004	NovaSeq	40	TRUE	GT	FreeBayes	notinAllTandemRepeatsandHomopolymers	AAaaaa	FP	144691	0.173064
HG002+HG003+HG004	NovaSeq	40	TRUE	GT	FreeBayes	notinAllTandemRepeatsandHomopolymers	AAAaaa	FN	217673	0.228816	0.282273
HG002+HG003+HG004	NovaSeq	40	TRUE	GT	FreeBayes	notinAllTandemRepeatsandHomopolymers	AAAaaa	FP	239059	0.285937
HG002+HG003+HG004	NovaSeq	40	TRUE	GT	FreeBayes	notinAllTandemRepeatsandHomopolymers	AAAAaa	FN	305219	0.320843	0.246443
HG002+HG003+HG004	NovaSeq	40	TRUE	GT	FreeBayes	notinAllTandemRepeatsandHomopolymers	AAAAaa	FP	222632	0.266289
HG002+HG003+HG004	NovaSeq	40	TRUE	GT	FreeBayes	notinAllTandemRepeatsandHomopolymers	AAAAAa	FN	187421	0.197015	0.175935
HG002+HG003+HG004	NovaSeq	40	TRUE	GT	FreeBayes	notinAllTandemRepeatsandHomopolymers	AAAAAa	FP	165612	0.198087
HG002+HG003+HG004	NovaSeq	50	TRUE	GT	Octopus	genome	aaaaaa	FN	11301	0.0220553	0.0138305
HG002+HG003+HG004	NovaSeq	50	TRUE	GT	Octopus	genome	aaaaaa	FP	1410	0.00283904
HG002+HG003+HG004	NovaSeq	50	TRUE	GT	Octopus	genome	Aaaaaa	FN	27987	0.0546201	0.0682427
HG002+HG003+HG004	NovaSeq	50	TRUE	GT	Octopus	genome	Aaaaaa	FP	38472	0.0774636
HG002+HG003+HG004	NovaSeq	50	TRUE	GT	Octopus	genome	AAaaaa	FN	83321	0.162611	0.139882
HG002+HG003+HG004	NovaSeq	50	TRUE	GT	Octopus	genome	AAaaaa	FP	80809	0.162709
HG002+HG003+HG004	NovaSeq	50	TRUE	GT	Octopus	genome	AAAaaa	FN	124866	0.243691	0.161923
HG002+HG003+HG004	NovaSeq	50	TRUE	GT	Octopus	genome	AAAaaa	FP	141847	0.28561
HG002+HG003+HG004	NovaSeq	50	TRUE	GT	Octopus	genome	AAAAaa	FN	180190	0.351663	0.145491
HG002+HG003+HG004	NovaSeq	50	TRUE	GT	Octopus	genome	AAAAaa	FP	128932	0.259605
HG002+HG003+HG004	NovaSeq	50	TRUE	GT	Octopus	genome	AAAAAa	FN	84729	0.165359	0.0795363
HG002+HG003+HG004	NovaSeq	50	TRUE	GT	Octopus	genome	AAAAAa	FP	105176	0.211773
HG002+HG003+HG004	NovaSeq	50	TRUE	GT	GATK4	genome	aaaaaa	FN	22795	0.0254947	0.0278972
HG002+HG003+HG004	NovaSeq	50	TRUE	GT	GATK4	genome	aaaaaa	FP	1028	0.00138174
HG002+HG003+HG004	NovaSeq	50	TRUE	GT	GATK4	genome	Aaaaaa	FN	46785	0.0523259	0.114079
HG002+HG003+HG004	NovaSeq	50	TRUE	GT	GATK4	genome	Aaaaaa	FP	58743	0.0789566
HG002+HG003+HG004	NovaSeq	50	TRUE	GT	GATK4	genome	AAaaaa	FN	140520	0.157162	0.235909
HG002+HG003+HG004	NovaSeq	50	TRUE	GT	GATK4	genome	AAaaaa	FP	126214	0.169645
HG002+HG003+HG004	NovaSeq	50	TRUE	GT	GATK4	genome	AAAaaa	FN	203871	0.228016	0.264375
HG002+HG003+HG004	NovaSeq	50	TRUE	GT	GATK4	genome	AAAaaa	FP	213704	0.28724
HG002+HG003+HG004	NovaSeq	50	TRUE	GT	GATK4	genome	AAAAaa	FN	284158	0.317812	0.229438
HG002+HG003+HG004	NovaSeq	50	TRUE	GT	GATK4	genome	AAAAaa	FP	192015	0.258088
HG002+HG003+HG004	NovaSeq	50	TRUE	GT	GATK4	genome	AAAAAa	FN	195979	0.219189	0.183968
HG002+HG003+HG004	NovaSeq	50	TRUE	GT	GATK4	genome	AAAAAa	FP	152287	0.204689
HG002+HG003+HG004	NovaSeq	50	TRUE	GT	FreeBayes	genome	aaaaaa	FN	26894	0.0303901	0.0329137
HG002+HG003+HG004	NovaSeq	50	TRUE	GT	FreeBayes	genome	aaaaaa	FP	1716	0.00222787
HG002+HG003+HG004	NovaSeq	50	TRUE	GT	FreeBayes	genome	Aaaaaa	FN	59340	0.067054	0.144693
HG002+HG003+HG004	NovaSeq	50	TRUE	GT	FreeBayes	genome	Aaaaaa	FP	54310	0.0705102
HG002+HG003+HG004	NovaSeq	50	TRUE	GT	FreeBayes	genome	AAaaaa	FN	144260	0.163013	0.242188
HG002+HG003+HG004	NovaSeq	50	TRUE	GT	FreeBayes	genome	AAaaaa	FP	131153	0.170275
HG002+HG003+HG004	NovaSeq	50	TRUE	GT	FreeBayes	genome	AAAaaa	FN	206847	0.233737	0.268234
HG002+HG003+HG004	NovaSeq	50	TRUE	GT	FreeBayes	genome	AAAaaa	FP	223115	0.289668
HG002+HG003+HG004	NovaSeq	50	TRUE	GT	FreeBayes	genome	AAAAaa	FN	290852	0.328662	0.234843
HG002+HG003+HG004	NovaSeq	50	TRUE	GT	FreeBayes	genome	AAAAaa	FP	203715	0.264481
HG002+HG003+HG004	NovaSeq	50	TRUE	GT	FreeBayes	genome	AAAAAa	FN	156765	0.177144	0.147158
HG002+HG003+HG004	NovaSeq	50	TRUE	GT	FreeBayes	genome	AAAAAa	FP	156234	0.202837
HG002+HG003+HG004	NovaSeq	50	TRUE	GT	Octopus	alldifficult	aaaaaa	FN	6379	0.0401447	0.00780682
HG002+HG003+HG004	NovaSeq	50	TRUE	GT	Octopus	alldifficult	aaaaaa	FP	1105	0.00726596
HG002+HG003+HG004	NovaSeq	50	TRUE	GT	Octopus	alldifficult	Aaaaaa	FN	10855	0.0683134	0.0264685
HG002+HG003+HG004	NovaSeq	50	TRUE	GT	Octopus	alldifficult	Aaaaaa	FP	9823	0.0645914
HG002+HG003+HG004	NovaSeq	50	TRUE	GT	Octopus	alldifficult	AAaaaa	FN	24941	0.15696	0.0418716
HG002+HG003+HG004	NovaSeq	50	TRUE	GT	Octopus	alldifficult	AAaaaa	FP	21005	0.138119
HG002+HG003+HG004	NovaSeq	50	TRUE	GT	Octopus	alldifficult	AAAaaa	FN	35631	0.224235	0.0462054
HG002+HG003+HG004	NovaSeq	50	TRUE	GT	Octopus	alldifficult	AAAaaa	FP	37557	0.246957
HG002+HG003+HG004	NovaSeq	50	TRUE	GT	Octopus	alldifficult	AAAAaa	FN	50708	0.319119	0.0409431
HG002+HG003+HG004	NovaSeq	50	TRUE	GT	Octopus	alldifficult	AAAAaa	FP	39930	0.262561
HG002+HG003+HG004	NovaSeq	50	TRUE	GT	Octopus	alldifficult	AAAAAa	FN	30386	0.191227	0.0285238
HG002+HG003+HG004	NovaSeq	50	TRUE	GT	Octopus	alldifficult	AAAAAa	FP	42659	0.280506
HG002+HG003+HG004	NovaSeq	50	TRUE	GT	GATK4	alldifficult	aaaaaa	FN	18430	0.0684723	0.0225552
HG002+HG003+HG004	NovaSeq	50	TRUE	GT	GATK4	alldifficult	aaaaaa	FP	595	0.00314344
HG002+HG003+HG004	NovaSeq	50	TRUE	GT	GATK4	alldifficult	Aaaaaa	FN	16633	0.061796	0.0405574
HG002+HG003+HG004	NovaSeq	50	TRUE	GT	GATK4	alldifficult	Aaaaaa	FP	13651	0.0721195
HG002+HG003+HG004	NovaSeq	50	TRUE	GT	GATK4	alldifficult	AAaaaa	FN	38139	0.141696	0.0640288
HG002+HG003+HG004	NovaSeq	50	TRUE	GT	GATK4	alldifficult	AAaaaa	FP	28862	0.152481
HG002+HG003+HG004	NovaSeq	50	TRUE	GT	GATK4	alldifficult	AAAaaa	FN	54388	0.202066	0.0705291
HG002+HG003+HG004	NovaSeq	50	TRUE	GT	GATK4	alldifficult	AAAaaa	FP	49120	0.259506
HG002+HG003+HG004	NovaSeq	50	TRUE	GT	GATK4	alldifficult	AAAAaa	FN	76670	0.284849	0.0619056
HG002+HG003+HG004	NovaSeq	50	TRUE	GT	GATK4	alldifficult	AAAAaa	FP	48878	0.258227
HG002+HG003+HG004	NovaSeq	50	TRUE	GT	GATK4	alldifficult	AAAAAa	FN	64900	0.241121	0.0609225
HG002+HG003+HG004	NovaSeq	50	TRUE	GT	GATK4	alldifficult	AAAAAa	FP	48177	0.254524
HG002+HG003+HG004	NovaSeq	50	TRUE	GT	FreeBayes	alldifficult	aaaaaa	FN	16240	0.061936	0.019875
HG002+HG003+HG004	NovaSeq	50	TRUE	GT	FreeBayes	alldifficult	aaaaaa	FP	1058	0.00532976
HG002+HG003+HG004	NovaSeq	50	TRUE	GT	FreeBayes	alldifficult	Aaaaaa	FN	20171	0.0769281	0.0491844
HG002+HG003+HG004	NovaSeq	50	TRUE	GT	FreeBayes	alldifficult	Aaaaaa	FP	11455	0.0577055
HG002+HG003+HG004	NovaSeq	50	TRUE	GT	FreeBayes	alldifficult	AAaaaa	FN	39358	0.150103	0.0660753
HG002+HG003+HG004	NovaSeq	50	TRUE	GT	FreeBayes	alldifficult	AAaaaa	FP	30160	0.151933
HG002+HG003+HG004	NovaSeq	50	TRUE	GT	FreeBayes	alldifficult	AAAaaa	FN	55344	0.211071	0.0717688
HG002+HG003+HG004	NovaSeq	50	TRUE	GT	FreeBayes	alldifficult	AAAaaa	FP	51279	0.258322
HG002+HG003+HG004	NovaSeq	50	TRUE	GT	FreeBayes	alldifficult	AAAAaa	FN	78141	0.298014	0.0630934
HG002+HG003+HG004	NovaSeq	50	TRUE	GT	FreeBayes	alldifficult	AAAAaa	FP	54045	0.272256
HG002+HG003+HG004	NovaSeq	50	TRUE	GT	FreeBayes	alldifficult	AAAAAa	FN	52952	0.201948	0.0497068
HG002+HG003+HG004	NovaSeq	50	TRUE	GT	FreeBayes	alldifficult	AAAAAa	FP	50511	0.254453
HG002+HG003+HG004	NovaSeq	50	TRUE	GT	Octopus	alllowmapandsegdup	aaaaaa	FN	4672	0.0646527	0.00571774
HG002+HG003+HG004	NovaSeq	50	TRUE	GT	Octopus	alllowmapandsegdup	aaaaaa	FP	172	0.00275112
HG002+HG003+HG004	NovaSeq	50	TRUE	GT	Octopus	alllowmapandsegdup	Aaaaaa	FN	6292	0.0870708	0.0153422
HG002+HG003+HG004	NovaSeq	50	TRUE	GT	Octopus	alllowmapandsegdup	Aaaaaa	FP	2812	0.0449776
HG002+HG003+HG004	NovaSeq	50	TRUE	GT	Octopus	alllowmapandsegdup	AAaaaa	FN	11107	0.153702	0.0186467
HG002+HG003+HG004	NovaSeq	50	TRUE	GT	Octopus	alllowmapandsegdup	AAaaaa	FP	6574	0.10515
HG002+HG003+HG004	NovaSeq	50	TRUE	GT	Octopus	alllowmapandsegdup	AAAaaa	FN	15341	0.212294	0.0198938
HG002+HG003+HG004	NovaSeq	50	TRUE	GT	Octopus	alllowmapandsegdup	AAAaaa	FP	12287	0.196529
HG002+HG003+HG004	NovaSeq	50	TRUE	GT	Octopus	alllowmapandsegdup	AAAAaa	FN	20305	0.280988	0.0163949
HG002+HG003+HG004	NovaSeq	50	TRUE	GT	Octopus	alllowmapandsegdup	AAAAaa	FP	16997	0.271865
HG002+HG003+HG004	NovaSeq	50	TRUE	GT	Octopus	alllowmapandsegdup	AAAAAa	FN	14546	0.201293	0.0136545
HG002+HG003+HG004	NovaSeq	50	TRUE	GT	Octopus	alllowmapandsegdup	AAAAAa	FP	23678	0.378727
HG002+HG003+HG004	NovaSeq	50	TRUE	GT	GATK4	alllowmapandsegdup	aaaaaa	FN	15740	0.130281	0.0192631
HG002+HG003+HG004	NovaSeq	50	TRUE	GT	GATK4	alllowmapandsegdup	aaaaaa	FP	71	0.0010514
HG002+HG003+HG004	NovaSeq	50	TRUE	GT	GATK4	alllowmapandsegdup	Aaaaaa	FN	9439	0.0781271	0.0230158
HG002+HG003+HG004	NovaSeq	50	TRUE	GT	GATK4	alllowmapandsegdup	Aaaaaa	FP	3413	0.0505412
HG002+HG003+HG004	NovaSeq	50	TRUE	GT	GATK4	alllowmapandsegdup	AAaaaa	FN	16355	0.135371	0.0274572
HG002+HG003+HG004	NovaSeq	50	TRUE	GT	GATK4	alllowmapandsegdup	AAaaaa	FP	8209	0.121563
HG002+HG003+HG004	NovaSeq	50	TRUE	GT	GATK4	alllowmapandsegdup	AAAaaa	FN	22602	0.187078	0.0293097
HG002+HG003+HG004	NovaSeq	50	TRUE	GT	GATK4	alllowmapandsegdup	AAAaaa	FP	14732	0.218158
HG002+HG003+HG004	NovaSeq	50	TRUE	GT	GATK4	alllowmapandsegdup	AAAAaa	FN	31065	0.257127	0.0250828
HG002+HG003+HG004	NovaSeq	50	TRUE	GT	GATK4	alllowmapandsegdup	AAAAaa	FP	17627	0.261029
HG002+HG003+HG004	NovaSeq	50	TRUE	GT	GATK4	alllowmapandsegdup	AAAAAa	FN	25615	0.212017	0.0240452
HG002+HG003+HG004	NovaSeq	50	TRUE	GT	GATK4	alllowmapandsegdup	AAAAAa	FP	23477	0.347658
HG002+HG003+HG004	NovaSeq	50	TRUE	GT	FreeBayes	alllowmapandsegdup	aaaaaa	FN	6454	0.0658034	0.00789861
HG002+HG003+HG004	NovaSeq	50	TRUE	GT	FreeBayes	alllowmapandsegdup	aaaaaa	FP	194	0.00253426
HG002+HG003+HG004	NovaSeq	50	TRUE	GT	FreeBayes	alllowmapandsegdup	Aaaaaa	FN	8920	0.0909462	0.0217503
HG002+HG003+HG004	NovaSeq	50	TRUE	GT	FreeBayes	alllowmapandsegdup	Aaaaaa	FP	2832	0.0369949
HG002+HG003+HG004	NovaSeq	50	TRUE	GT	FreeBayes	alllowmapandsegdup	AAaaaa	FN	14922	0.152141	0.0250515
HG002+HG003+HG004	NovaSeq	50	TRUE	GT	FreeBayes	alllowmapandsegdup	AAaaaa	FP	9731	0.127118
HG002+HG003+HG004	NovaSeq	50	TRUE	GT	FreeBayes	alllowmapandsegdup	AAAaaa	FN	20512	0.209135	0.0265995
HG002+HG003+HG004	NovaSeq	50	TRUE	GT	FreeBayes	alllowmapandsegdup	AAAaaa	FP	17042	0.222623
HG002+HG003+HG004	NovaSeq	50	TRUE	GT	FreeBayes	alllowmapandsegdup	AAAAaa	FN	27162	0.276937	0.0219314
HG002+HG003+HG004	NovaSeq	50	TRUE	GT	FreeBayes	alllowmapandsegdup	AAAAaa	FP	22087	0.288527
HG002+HG003+HG004	NovaSeq	50	TRUE	GT	FreeBayes	alllowmapandsegdup	AAAAAa	FN	20110	0.205037	0.0188775
HG002+HG003+HG004	NovaSeq	50	TRUE	GT	FreeBayes	alllowmapandsegdup	AAAAAa	FP	24665	0.322203
HG002+HG003+HG004	NovaSeq	50	TRUE	GT	Octopus	notinalldifficult	aaaaaa	FN	4923	0.0139244	0.00602492
HG002+HG003+HG004	NovaSeq	50	TRUE	GT	Octopus	notinalldifficult	aaaaaa	FP	306	0.00088788
HG002+HG003+HG004	NovaSeq	50	TRUE	GT	Octopus	notinalldifficult	Aaaaaa	FN	17133	0.0484595	0.0417766
HG002+HG003+HG004	NovaSeq	50	TRUE	GT	Octopus	notinalldifficult	Aaaaaa	FP	28645	0.0831155
HG002+HG003+HG004	NovaSeq	50	TRUE	GT	Octopus	notinalldifficult	AAaaaa	FN	58377	0.165115	0.0980049
HG002+HG003+HG004	NovaSeq	50	TRUE	GT	Octopus	notinalldifficult	AAaaaa	FP	59801	0.173517
HG002+HG003+HG004	NovaSeq	50	TRUE	GT	Octopus	notinalldifficult	AAAaaa	FN	89252	0.252443	0.11574
HG002+HG003+HG004	NovaSeq	50	TRUE	GT	Octopus	notinalldifficult	AAAaaa	FP	104294	0.302616
HG002+HG003+HG004	NovaSeq	50	TRUE	GT	Octopus	notinalldifficult	AAAAaa	FN	129518	0.366333	0.104577
HG002+HG003+HG004	NovaSeq	50	TRUE	GT	Octopus	notinalldifficult	AAAAaa	FP	89014	0.25828
HG002+HG003+HG004	NovaSeq	50	TRUE	GT	Octopus	notinalldifficult	AAAAAa	FN	54350	0.153725	0.0510191
HG002+HG003+HG004	NovaSeq	50	TRUE	GT	Octopus	notinalldifficult	AAAAAa	FP	62581	0.181583
HG002+HG003+HG004	NovaSeq	50	TRUE	GT	GATK4	notinalldifficult	aaaaaa	FN	4364	0.00698203	0.0053408
HG002+HG003+HG004	NovaSeq	50	TRUE	GT	GATK4	notinalldifficult	aaaaaa	FP	433	0.000780505
HG002+HG003+HG004	NovaSeq	50	TRUE	GT	GATK4	notinalldifficult	Aaaaaa	FN	30147	0.0482327	0.0735095
HG002+HG003+HG004	NovaSeq	50	TRUE	GT	GATK4	notinalldifficult	Aaaaaa	FP	45087	0.0812717
HG002+HG003+HG004	NovaSeq	50	TRUE	GT	GATK4	notinalldifficult	AAaaaa	FN	102374	0.16379	0.171868
HG002+HG003+HG004	NovaSeq	50	TRUE	GT	GATK4	notinalldifficult	AAaaaa	FP	97346	0.175471
HG002+HG003+HG004	NovaSeq	50	TRUE	GT	GATK4	notinalldifficult	AAAaaa	FN	149504	0.239194	0.193873
HG002+HG003+HG004	NovaSeq	50	TRUE	GT	GATK4	notinalldifficult	AAAaaa	FP	164593	0.296687
HG002+HG003+HG004	NovaSeq	50	TRUE	GT	GATK4	notinalldifficult	AAAAaa	FN	207533	0.332035	0.167568
HG002+HG003+HG004	NovaSeq	50	TRUE	GT	GATK4	notinalldifficult	AAAAaa	FP	143170	0.258071
HG002+HG003+HG004	NovaSeq	50	TRUE	GT	GATK4	notinalldifficult	AAAAAa	FN	131111	0.209767	0.123076
HG002+HG003+HG004	NovaSeq	50	TRUE	GT	GATK4	notinalldifficult	AAAAAa	FP	104140	0.187718
HG002+HG003+HG004	NovaSeq	50	TRUE	GT	FreeBayes	notinalldifficult	aaaaaa	FN	10622	0.0170536	0.0129995
HG002+HG003+HG004	NovaSeq	50	TRUE	GT	FreeBayes	notinalldifficult	aaaaaa	FP	874	0.00150058
HG002+HG003+HG004	NovaSeq	50	TRUE	GT	FreeBayes	notinalldifficult	Aaaaaa	FN	39168	0.0628841	0.0955061
HG002+HG003+HG004	NovaSeq	50	TRUE	GT	FreeBayes	notinalldifficult	Aaaaaa	FP	43571	0.0748073
HG002+HG003+HG004	NovaSeq	50	TRUE	GT	FreeBayes	notinalldifficult	AAaaaa	FN	104892	0.168404	0.176096
HG002+HG003+HG004	NovaSeq	50	TRUE	GT	FreeBayes	notinalldifficult	AAaaaa	FP	102700	0.176326
HG002+HG003+HG004	NovaSeq	50	TRUE	GT	FreeBayes	notinalldifficult	AAAaaa	FN	151533	0.243286	0.196504
HG002+HG003+HG004	NovaSeq	50	TRUE	GT	FreeBayes	notinalldifficult	AAAaaa	FP	174790	0.300098
HG002+HG003+HG004	NovaSeq	50	TRUE	GT	FreeBayes	notinalldifficult	AAAAaa	FN	212762	0.341589	0.17179
HG002+HG003+HG004	NovaSeq	50	TRUE	GT	FreeBayes	notinalldifficult	AAAAaa	FP	152684	0.262144
HG002+HG003+HG004	NovaSeq	50	TRUE	GT	FreeBayes	notinalldifficult	AAAAAa	FN	103883	0.166784	0.0975164
HG002+HG003+HG004	NovaSeq	50	TRUE	GT	FreeBayes	notinalldifficult	AAAAAa	FP	107824	0.185124
HG002+HG003+HG004	NovaSeq	50	TRUE	GT	Octopus	notinalllowmapandsegdup	aaaaaa	FN	6630	0.0150643	0.008114
HG002+HG003+HG004	NovaSeq	50	TRUE	GT	Octopus	notinalllowmapandsegdup	aaaaaa	FP	1238	0.00285169
HG002+HG003+HG004	NovaSeq	50	TRUE	GT	Octopus	notinalllowmapandsegdup	Aaaaaa	FN	21695	0.0492942	0.0529004
HG002+HG003+HG004	NovaSeq	50	TRUE	GT	Octopus	notinalllowmapandsegdup	Aaaaaa	FP	35661	0.082144
HG002+HG003+HG004	NovaSeq	50	TRUE	GT	Octopus	notinalllowmapandsegdup	AAaaaa	FN	72207	0.164065	0.121223
HG002+HG003+HG004	NovaSeq	50	TRUE	GT	Octopus	notinalllowmapandsegdup	AAaaaa	FP	74229	0.170984
HG002+HG003+HG004	NovaSeq	50	TRUE	GT	Octopus	notinalllowmapandsegdup	AAAaaa	FN	109519	0.248843	0.142022
HG002+HG003+HG004	NovaSeq	50	TRUE	GT	Octopus	notinalllowmapandsegdup	AAAaaa	FP	129551	0.298417
HG002+HG003+HG004	NovaSeq	50	TRUE	GT	Octopus	notinalllowmapandsegdup	AAAAaa	FN	159877	0.363264	0.129089
HG002+HG003+HG004	NovaSeq	50	TRUE	GT	Octopus	notinalllowmapandsegdup	AAAAaa	FP	111931	0.257829
HG002+HG003+HG004	NovaSeq	50	TRUE	GT	Octopus	notinalllowmapandsegdup	AAAAAa	FN	70185	0.15947	0.0658837
HG002+HG003+HG004	NovaSeq	50	TRUE	GT	Octopus	notinalllowmapandsegdup	AAAAAa	FP	81518	0.187774
HG002+HG003+HG004	NovaSeq	50	TRUE	GT	GATK4	notinalllowmapandsegdup	aaaaaa	FN	7051	0.0091186	0.00862924
HG002+HG003+HG004	NovaSeq	50	TRUE	GT	GATK4	notinalllowmapandsegdup	aaaaaa	FP	957	0.0014148
HG002+HG003+HG004	NovaSeq	50	TRUE	GT	GATK4	notinalllowmapandsegdup	Aaaaaa	FN	37341	0.0482907	0.0910512
HG002+HG003+HG004	NovaSeq	50	TRUE	GT	GATK4	notinalllowmapandsegdup	Aaaaaa	FP	55328	0.081795
HG002+HG003+HG004	NovaSeq	50	TRUE	GT	GATK4	notinalllowmapandsegdup	AAaaaa	FN	124153	0.160559	0.208431
HG002+HG003+HG004	NovaSeq	50	TRUE	GT	GATK4	notinalllowmapandsegdup	AAaaaa	FP	117995	0.17444
HG002+HG003+HG004	NovaSeq	50	TRUE	GT	GATK4	notinalllowmapandsegdup	AAAaaa	FN	181260	0.234412	0.235054
HG002+HG003+HG004	NovaSeq	50	TRUE	GT	GATK4	notinalllowmapandsegdup	AAAaaa	FP	198956	0.29413
HG002+HG003+HG004	NovaSeq	50	TRUE	GT	GATK4	notinalllowmapandsegdup	AAAAaa	FN	253084	0.327297	0.204348
HG002+HG003+HG004	NovaSeq	50	TRUE	GT	GATK4	notinalllowmapandsegdup	AAAAaa	FP	174381	0.257799
HG002+HG003+HG004	NovaSeq	50	TRUE	GT	GATK4	notinalllowmapandsegdup	AAAAAa	FN	170366	0.220323	0.159925
HG002+HG003+HG004	NovaSeq	50	TRUE	GT	GATK4	notinalllowmapandsegdup	AAAAAa	FP	128806	0.190422
HG002+HG003+HG004	NovaSeq	50	TRUE	GT	FreeBayes	notinalllowmapandsegdup	aaaaaa	FN	20426	0.02596	0.024998
HG002+HG003+HG004	NovaSeq	50	TRUE	GT	FreeBayes	notinalllowmapandsegdup	aaaaaa	FP	1526	0.00219886
HG002+HG003+HG004	NovaSeq	50	TRUE	GT	FreeBayes	notinalllowmapandsegdup	Aaaaaa	FN	50416	0.0640751	0.122933
HG002+HG003+HG004	NovaSeq	50	TRUE	GT	FreeBayes	notinalllowmapandsegdup	Aaaaaa	FP	51492	0.0741964
HG002+HG003+HG004	NovaSeq	50	TRUE	GT	FreeBayes	notinalllowmapandsegdup	AAaaaa	FN	129319	0.164355	0.217104
HG002+HG003+HG004	NovaSeq	50	TRUE	GT	FreeBayes	notinalllowmapandsegdup	AAaaaa	FP	121466	0.175024
HG002+HG003+HG004	NovaSeq	50	TRUE	GT	FreeBayes	notinalllowmapandsegdup	AAAaaa	FN	186322	0.236802	0.241618
HG002+HG003+HG004	NovaSeq	50	TRUE	GT	FreeBayes	notinalllowmapandsegdup	AAAaaa	FP	206155	0.297055
HG002+HG003+HG004	NovaSeq	50	TRUE	GT	FreeBayes	notinalllowmapandsegdup	AAAAaa	FN	263681	0.335119	0.212904
HG002+HG003+HG004	NovaSeq	50	TRUE	GT	FreeBayes	notinalllowmapandsegdup	AAAAaa	FP	181719	0.261844
HG002+HG003+HG004	NovaSeq	50	TRUE	GT	FreeBayes	notinalllowmapandsegdup	AAAAAa	FN	136663	0.173689	0.128287
HG002+HG003+HG004	NovaSeq	50	TRUE	GT	FreeBayes	notinalllowmapandsegdup	AAAAAa	FP	131638	0.189681
HG002+HG003+HG004	NovaSeq	50	TRUE	GT	Octopus	AllTandemRepeatsandHomopolymers	aaaaaa	FN	1342	0.0218891	0.00164238
HG002+HG003+HG004	NovaSeq	50	TRUE	GT	Octopus	AllTandemRepeatsandHomopolymers	aaaaaa	FP	879	0.0134804
HG002+HG003+HG004	NovaSeq	50	TRUE	GT	Octopus	AllTandemRepeatsandHomopolymers	Aaaaaa	FN	3278	0.0534669	0.00799298
HG002+HG003+HG004	NovaSeq	50	TRUE	GT	Octopus	AllTandemRepeatsandHomopolymers	Aaaaaa	FP	4943	0.0758059
HG002+HG003+HG004	NovaSeq	50	TRUE	GT	Octopus	AllTandemRepeatsandHomopolymers	AAaaaa	FN	9182	0.149766	0.015415
HG002+HG003+HG004	NovaSeq	50	TRUE	GT	Octopus	AllTandemRepeatsandHomopolymers	AAaaaa	FP	10371	0.15905
HG002+HG003+HG004	NovaSeq	50	TRUE	GT	Octopus	AllTandemRepeatsandHomopolymers	AAAaaa	FN	14253	0.232478	0.018483
HG002+HG003+HG004	NovaSeq	50	TRUE	GT	Octopus	AllTandemRepeatsandHomopolymers	AAAaaa	FP	17702	0.271478
HG002+HG003+HG004	NovaSeq	50	TRUE	GT	Octopus	AllTandemRepeatsandHomopolymers	AAAAaa	FN	21132	0.34468	0.0170626
HG002+HG003+HG004	NovaSeq	50	TRUE	GT	Octopus	AllTandemRepeatsandHomopolymers	AAAAaa	FP	16819	0.257936
HG002+HG003+HG004	NovaSeq	50	TRUE	GT	Octopus	AllTandemRepeatsandHomopolymers	AAAAAa	FN	12122	0.19772	0.0113791
HG002+HG003+HG004	NovaSeq	50	TRUE	GT	Octopus	AllTandemRepeatsandHomopolymers	AAAAAa	FP	14492	0.222249
HG002+HG003+HG004	NovaSeq	50	TRUE	GT	GATK4	AllTandemRepeatsandHomopolymers	aaaaaa	FN	2383	0.0229658	0.00291639
HG002+HG003+HG004	NovaSeq	50	TRUE	GT	GATK4	AllTandemRepeatsandHomopolymers	aaaaaa	FP	467	0.00576728
HG002+HG003+HG004	NovaSeq	50	TRUE	GT	GATK4	AllTandemRepeatsandHomopolymers	Aaaaaa	FN	4865	0.0468857	0.0118627
HG002+HG003+HG004	NovaSeq	50	TRUE	GT	GATK4	AllTandemRepeatsandHomopolymers	Aaaaaa	FP	7125	0.0879912
HG002+HG003+HG004	NovaSeq	50	TRUE	GT	GATK4	AllTandemRepeatsandHomopolymers	AAaaaa	FN	14043	0.135337	0.0235758
HG002+HG003+HG004	NovaSeq	50	TRUE	GT	GATK4	AllTandemRepeatsandHomopolymers	AAaaaa	FP	13848	0.171018
HG002+HG003+HG004	NovaSeq	50	TRUE	GT	GATK4	AllTandemRepeatsandHomopolymers	AAAaaa	FN	21539	0.207579	0.0279313
HG002+HG003+HG004	NovaSeq	50	TRUE	GT	GATK4	AllTandemRepeatsandHomopolymers	AAAaaa	FP	22699	0.280325
HG002+HG003+HG004	NovaSeq	50	TRUE	GT	GATK4	AllTandemRepeatsandHomopolymers	AAAAaa	FN	30778	0.296618	0.0248511
HG002+HG003+HG004	NovaSeq	50	TRUE	GT	GATK4	AllTandemRepeatsandHomopolymers	AAAAaa	FP	21160	0.261318
HG002+HG003+HG004	NovaSeq	50	TRUE	GT	GATK4	AllTandemRepeatsandHomopolymers	AAAAAa	FN	30155	0.290614	0.0283069
HG002+HG003+HG004	NovaSeq	50	TRUE	GT	GATK4	AllTandemRepeatsandHomopolymers	AAAAAa	FP	15675	0.193581
HG002+HG003+HG004	NovaSeq	50	TRUE	GT	FreeBayes	AllTandemRepeatsandHomopolymers	aaaaaa	FN	8611	0.0722109	0.0105384
HG002+HG003+HG004	NovaSeq	50	TRUE	GT	FreeBayes	AllTandemRepeatsandHomopolymers	aaaaaa	FP	815	0.0100728
HG002+HG003+HG004	NovaSeq	50	TRUE	GT	FreeBayes	AllTandemRepeatsandHomopolymers	Aaaaaa	FN	8152	0.0683617	0.0198776
HG002+HG003+HG004	NovaSeq	50	TRUE	GT	FreeBayes	AllTandemRepeatsandHomopolymers	Aaaaaa	FP	5595	0.0691501
HG002+HG003+HG004	NovaSeq	50	TRUE	GT	FreeBayes	AllTandemRepeatsandHomopolymers	AAaaaa	FN	16536	0.138669	0.0277611
HG002+HG003+HG004	NovaSeq	50	TRUE	GT	FreeBayes	AllTandemRepeatsandHomopolymers	AAaaaa	FP	13482	0.166628
HG002+HG003+HG004	NovaSeq	50	TRUE	GT	FreeBayes	AllTandemRepeatsandHomopolymers	AAAaaa	FN	24540	0.20579	0.0318229
HG002+HG003+HG004	NovaSeq	50	TRUE	GT	FreeBayes	AllTandemRepeatsandHomopolymers	AAAaaa	FP	22148	0.273733
HG002+HG003+HG004	NovaSeq	50	TRUE	GT	FreeBayes	AllTandemRepeatsandHomopolymers	AAAAaa	FN	35815	0.30034	0.0289181
HG002+HG003+HG004	NovaSeq	50	TRUE	GT	FreeBayes	AllTandemRepeatsandHomopolymers	AAAAaa	FP	21690	0.268072
HG002+HG003+HG004	NovaSeq	50	TRUE	GT	FreeBayes	AllTandemRepeatsandHomopolymers	AAAAAa	FN	25594	0.214628	0.0240255
HG002+HG003+HG004	NovaSeq	50	TRUE	GT	FreeBayes	AllTandemRepeatsandHomopolymers	AAAAAa	FP	17181	0.212344
HG002+HG003+HG004	NovaSeq	50	TRUE	GT	Octopus	notinAllTandemRepeatsandHomopolymers	aaaaaa	FN	9959	0.0220736	0.0121881
HG002+HG003+HG004	NovaSeq	50	TRUE	GT	Octopus	notinAllTandemRepeatsandHomopolymers	aaaaaa	FP	532	0.00123282
HG002+HG003+HG004	NovaSeq	50	TRUE	GT	Octopus	notinAllTandemRepeatsandHomopolymers	Aaaaaa	FN	24711	0.0547706	0.0602546
HG002+HG003+HG004	NovaSeq	50	TRUE	GT	Octopus	notinAllTandemRepeatsandHomopolymers	Aaaaaa	FP	33524	0.0776864
HG002+HG003+HG004	NovaSeq	50	TRUE	GT	Octopus	notinAllTandemRepeatsandHomopolymers	AAaaaa	FN	74142	0.164332	0.124472
HG002+HG003+HG004	NovaSeq	50	TRUE	GT	Octopus	notinAllTandemRepeatsandHomopolymers	AAaaaa	FP	70441	0.163235
HG002+HG003+HG004	NovaSeq	50	TRUE	GT	Octopus	notinAllTandemRepeatsandHomopolymers	AAAaaa	FN	110635	0.245216	0.143469
HG002+HG003+HG004	NovaSeq	50	TRUE	GT	Octopus	notinAllTandemRepeatsandHomopolymers	AAAaaa	FP	124157	0.287713
HG002+HG003+HG004	NovaSeq	50	TRUE	GT	Octopus	notinAllTandemRepeatsandHomopolymers	AAAAaa	FN	159103	0.352643	0.128464
HG002+HG003+HG004	NovaSeq	50	TRUE	GT	Octopus	notinAllTandemRepeatsandHomopolymers	AAAAaa	FP	112132	0.259848
HG002+HG003+HG004	NovaSeq	50	TRUE	GT	Octopus	notinAllTandemRepeatsandHomopolymers	AAAAAa	FN	72623	0.160965	0.0681722
HG002+HG003+HG004	NovaSeq	50	TRUE	GT	Octopus	notinAllTandemRepeatsandHomopolymers	AAAAAa	FP	90744	0.210284
HG002+HG003+HG004	NovaSeq	50	TRUE	GT	GATK4	notinAllTandemRepeatsandHomopolymers	aaaaaa	FN	20414	0.0258253	0.0249833
HG002+HG003+HG004	NovaSeq	50	TRUE	GT	GATK4	notinAllTandemRepeatsandHomopolymers	aaaaaa	FP	561	0.000846019
HG002+HG003+HG004	NovaSeq	50	TRUE	GT	GATK4	notinAllTandemRepeatsandHomopolymers	Aaaaaa	FN	41920	0.0530321	0.102216
HG002+HG003+HG004	NovaSeq	50	TRUE	GT	GATK4	notinAllTandemRepeatsandHomopolymers	Aaaaaa	FP	51615	0.0778382
HG002+HG003+HG004	NovaSeq	50	TRUE	GT	GATK4	notinAllTandemRepeatsandHomopolymers	AAaaaa	FN	126480	0.160007	0.212338
HG002+HG003+HG004	NovaSeq	50	TRUE	GT	GATK4	notinAllTandemRepeatsandHomopolymers	AAaaaa	FP	112370	0.16946
HG002+HG003+HG004	NovaSeq	50	TRUE	GT	GATK4	notinAllTandemRepeatsandHomopolymers	AAAaaa	FN	182357	0.230696	0.236476
HG002+HG003+HG004	NovaSeq	50	TRUE	GT	GATK4	notinAllTandemRepeatsandHomopolymers	AAAaaa	FP	191026	0.288078
HG002+HG003+HG004	NovaSeq	50	TRUE	GT	GATK4	notinAllTandemRepeatsandHomopolymers	AAAAaa	FN	253433	0.320613	0.204629
HG002+HG003+HG004	NovaSeq	50	TRUE	GT	GATK4	notinAllTandemRepeatsandHomopolymers	AAAAaa	FP	170887	0.257707
HG002+HG003+HG004	NovaSeq	50	TRUE	GT	GATK4	notinAllTandemRepeatsandHomopolymers	AAAAAa	FN	165860	0.209826	0.155695
HG002+HG003+HG004	NovaSeq	50	TRUE	GT	GATK4	notinAllTandemRepeatsandHomopolymers	AAAAAa	FP	136647	0.206071
HG002+HG003+HG004	NovaSeq	50	TRUE	GT	FreeBayes	notinAllTandemRepeatsandHomopolymers	aaaaaa	FN	18261	0.0238436	0.0223484
HG002+HG003+HG004	NovaSeq	50	TRUE	GT	FreeBayes	notinAllTandemRepeatsandHomopolymers	aaaaaa	FP	1132	0.00161499
HG002+HG003+HG004	NovaSeq	50	TRUE	GT	FreeBayes	notinAllTandemRepeatsandHomopolymers	Aaaaaa	FN	51189	0.0668382	0.124818
HG002+HG003+HG004	NovaSeq	50	TRUE	GT	FreeBayes	notinAllTandemRepeatsandHomopolymers	Aaaaaa	FP	49487	0.0706014
HG002+HG003+HG004	NovaSeq	50	TRUE	GT	FreeBayes	notinAllTandemRepeatsandHomopolymers	AAaaaa	FN	127728	0.166776	0.214433
HG002+HG003+HG004	NovaSeq	50	TRUE	GT	FreeBayes	notinAllTandemRepeatsandHomopolymers	AAaaaa	FP	119508	0.170498
HG002+HG003+HG004	NovaSeq	50	TRUE	GT	FreeBayes	notinAllTandemRepeatsandHomopolymers	AAAaaa	FN	182341	0.238085	0.236455
HG002+HG003+HG004	NovaSeq	50	TRUE	GT	FreeBayes	notinAllTandemRepeatsandHomopolymers	AAAaaa	FP	204185	0.291304
HG002+HG003+HG004	NovaSeq	50	TRUE	GT	FreeBayes	notinAllTandemRepeatsandHomopolymers	AAAAaa	FN	255099	0.333086	0.205974
HG002+HG003+HG004	NovaSeq	50	TRUE	GT	FreeBayes	notinAllTandemRepeatsandHomopolymers	AAAAaa	FP	185291	0.264348
HG002+HG003+HG004	NovaSeq	50	TRUE	GT	FreeBayes	notinAllTandemRepeatsandHomopolymers	AAAAAa	FN	131247	0.171371	0.123203
HG002+HG003+HG004	NovaSeq	50	TRUE	GT	FreeBayes	notinAllTandemRepeatsandHomopolymers	AAAAAa	FP	141332	0.201634
HG002+HG003+HG004	NovaSeq	60	TRUE	GT	Octopus	genome	aaaaaa	FN	9256	0.0230782	0.0113278
HG002+HG003+HG004	NovaSeq	60	TRUE	GT	Octopus	genome	aaaaaa	FP	915	0.00230181
HG002+HG003+HG004	NovaSeq	60	TRUE	GT	Octopus	genome	Aaaaaa	FN	22022	0.054908	0.0536978
HG002+HG003+HG004	NovaSeq	60	TRUE	GT	Octopus	genome	Aaaaaa	FP	28825	0.0725134
HG002+HG003+HG004	NovaSeq	60	TRUE	GT	Octopus	genome	AAaaaa	FN	66193	0.165041	0.111127
HG002+HG003+HG004	NovaSeq	60	TRUE	GT	Octopus	genome	AAaaaa	FP	63007	0.158503
HG002+HG003+HG004	NovaSeq	60	TRUE	GT	Octopus	genome	AAAaaa	FN	100580	0.250779	0.13043
HG002+HG003+HG004	NovaSeq	60	TRUE	GT	Octopus	genome	AAAaaa	FP	112852	0.283895
HG002+HG003+HG004	NovaSeq	60	TRUE	GT	Octopus	genome	AAAAaa	FN	142685	0.35576	0.115208
HG002+HG003+HG004	NovaSeq	60	TRUE	GT	Octopus	genome	AAAAaa	FP	102727	0.258424
HG002+HG003+HG004	NovaSeq	60	TRUE	GT	Octopus	genome	AAAAAa	FN	60335	0.150435	0.0566373
HG002+HG003+HG004	NovaSeq	60	TRUE	GT	Octopus	genome	AAAAAa	FP	89187	0.224362
HG002+HG003+HG004	NovaSeq	60	TRUE	GT	GATK4	genome	aaaaaa	FN	20905	0.0279939	0.0255842
HG002+HG003+HG004	NovaSeq	60	TRUE	GT	GATK4	genome	aaaaaa	FP	545	0.000878267
HG002+HG003+HG004	NovaSeq	60	TRUE	GT	GATK4	genome	Aaaaaa	FN	39319	0.052652	0.0958743
HG002+HG003+HG004	NovaSeq	60	TRUE	GT	GATK4	genome	Aaaaaa	FP	46285	0.0745883
HG002+HG003+HG004	NovaSeq	60	TRUE	GT	GATK4	genome	AAaaaa	FN	118215	0.158302	0.198463
HG002+HG003+HG004	NovaSeq	60	TRUE	GT	GATK4	genome	AAaaaa	FP	105340	0.169755
HG002+HG003+HG004	NovaSeq	60	TRUE	GT	GATK4	genome	AAAaaa	FN	173335	0.232113	0.224777
HG002+HG003+HG004	NovaSeq	60	TRUE	GT	GATK4	genome	AAAaaa	FP	181177	0.291967
HG002+HG003+HG004	NovaSeq	60	TRUE	GT	GATK4	genome	AAAAaa	FN	236307	0.316438	0.190801
HG002+HG003+HG004	NovaSeq	60	TRUE	GT	GATK4	genome	AAAAaa	FP	160841	0.259195
HG002+HG003+HG004	NovaSeq	60	TRUE	GT	GATK4	genome	AAAAAa	FN	158690	0.212502	0.148965
HG002+HG003+HG004	NovaSeq	60	TRUE	GT	GATK4	genome	AAAAAa	FP	126352	0.203616
HG002+HG003+HG004	NovaSeq	60	TRUE	GT	FreeBayes	genome	aaaaaa	FN	24134	0.0326821	0.0295359
HG002+HG003+HG004	NovaSeq	60	TRUE	GT	FreeBayes	genome	aaaaaa	FP	1035	0.00157571
HG002+HG003+HG004	NovaSeq	60	TRUE	GT	FreeBayes	genome	Aaaaaa	FN	48179	0.0652437	0.117478
HG002+HG003+HG004	NovaSeq	60	TRUE	GT	FreeBayes	genome	Aaaaaa	FP	44584	0.067876
HG002+HG003+HG004	NovaSeq	60	TRUE	GT	FreeBayes	genome	AAaaaa	FN	122944	0.16649	0.206402
HG002+HG003+HG004	NovaSeq	60	TRUE	GT	FreeBayes	genome	AAaaaa	FP	111008	0.169002
HG002+HG003+HG004	NovaSeq	60	TRUE	GT	FreeBayes	genome	AAAaaa	FN	178954	0.242338	0.232063
HG002+HG003+HG004	NovaSeq	60	TRUE	GT	FreeBayes	genome	AAAaaa	FP	190952	0.290711
HG002+HG003+HG004	NovaSeq	60	TRUE	GT	FreeBayes	genome	AAAAaa	FN	245856	0.332937	0.198511
HG002+HG003+HG004	NovaSeq	60	TRUE	GT	FreeBayes	genome	AAAAaa	FP	174024	0.264939
HG002+HG003+HG004	NovaSeq	60	TRUE	GT	FreeBayes	genome	AAAAAa	FN	118380	0.160309	0.111125
HG002+HG003+HG004	NovaSeq	60	TRUE	GT	FreeBayes	genome	AAAAAa	FP	135242	0.205896
HG002+HG003+HG004	NovaSeq	60	TRUE	GT	Octopus	alldifficult	aaaaaa	FN	5864	0.0438273	0.00717655
HG002+HG003+HG004	NovaSeq	60	TRUE	GT	Octopus	alldifficult	aaaaaa	FP	791	0.0060084
HG002+HG003+HG004	NovaSeq	60	TRUE	GT	Octopus	alldifficult	Aaaaaa	FN	9433	0.0705018	0.0230011
HG002+HG003+HG004	NovaSeq	60	TRUE	GT	Octopus	alldifficult	Aaaaaa	FP	7885	0.0598941
HG002+HG003+HG004	NovaSeq	60	TRUE	GT	Octopus	alldifficult	AAaaaa	FN	21363	0.159666	0.0358648
HG002+HG003+HG004	NovaSeq	60	TRUE	GT	Octopus	alldifficult	AAaaaa	FP	17162	0.130362
HG002+HG003+HG004	NovaSeq	60	TRUE	GT	Octopus	alldifficult	AAAaaa	FN	30786	0.230093	0.0399226
HG002+HG003+HG004	NovaSeq	60	TRUE	GT	Octopus	alldifficult	AAAaaa	FP	31248	0.237358
HG002+HG003+HG004	NovaSeq	60	TRUE	GT	Octopus	alldifficult	AAAAaa	FN	42632	0.31863	0.0344223
HG002+HG003+HG004	NovaSeq	60	TRUE	GT	Octopus	alldifficult	AAAAaa	FP	34291	0.260473
HG002+HG003+HG004	NovaSeq	60	TRUE	GT	Octopus	alldifficult	AAAAAa	FN	23720	0.177282	0.0222663
HG002+HG003+HG004	NovaSeq	60	TRUE	GT	Octopus	alldifficult	AAAAAa	FP	40272	0.305904
HG002+HG003+HG004	NovaSeq	60	TRUE	GT	GATK4	alldifficult	aaaaaa	FN	17858	0.0749432	0.0218552
HG002+HG003+HG004	NovaSeq	60	TRUE	GT	GATK4	alldifficult	aaaaaa	FP	364	0.0022241
HG002+HG003+HG004	NovaSeq	60	TRUE	GT	GATK4	alldifficult	Aaaaaa	FN	14964	0.0627982	0.0364878
HG002+HG003+HG004	NovaSeq	60	TRUE	GT	GATK4	alldifficult	Aaaaaa	FP	11091	0.0677677
HG002+HG003+HG004	NovaSeq	60	TRUE	GT	GATK4	alldifficult	AAaaaa	FN	33980	0.142601	0.0570465
HG002+HG003+HG004	NovaSeq	60	TRUE	GT	GATK4	alldifficult	AAaaaa	FP	24587	0.15023
HG002+HG003+HG004	NovaSeq	60	TRUE	GT	GATK4	alldifficult	AAAaaa	FN	48242	0.202453	0.0625591
HG002+HG003+HG004	NovaSeq	60	TRUE	GT	GATK4	alldifficult	AAAaaa	FP	42506	0.259718
HG002+HG003+HG004	NovaSeq	60	TRUE	GT	GATK4	alldifficult	AAAAaa	FN	66533	0.279214	0.0537207
HG002+HG003+HG004	NovaSeq	60	TRUE	GT	GATK4	alldifficult	AAAAaa	FP	42440	0.259315
HG002+HG003+HG004	NovaSeq	60	TRUE	GT	GATK4	alldifficult	AAAAAa	FN	56710	0.23799	0.0532345
HG002+HG003+HG004	NovaSeq	60	TRUE	GT	GATK4	alldifficult	AAAAAa	FP	42674	0.260745
HG002+HG003+HG004	NovaSeq	60	TRUE	GT	FreeBayes	alldifficult	aaaaaa	FN	15182	0.0663175	0.0185802
HG002+HG003+HG004	NovaSeq	60	TRUE	GT	FreeBayes	alldifficult	aaaaaa	FP	745	0.00419721
HG002+HG003+HG004	NovaSeq	60	TRUE	GT	FreeBayes	alldifficult	Aaaaaa	FN	17643	0.0770676	0.0430202
HG002+HG003+HG004	NovaSeq	60	TRUE	GT	FreeBayes	alldifficult	Aaaaaa	FP	9566	0.0538933
HG002+HG003+HG004	NovaSeq	60	TRUE	GT	FreeBayes	alldifficult	AAaaaa	FN	35224	0.153864	0.059135
HG002+HG003+HG004	NovaSeq	60	TRUE	GT	FreeBayes	alldifficult	AAaaaa	FP	26296	0.148147
HG002+HG003+HG004	NovaSeq	60	TRUE	GT	FreeBayes	alldifficult	AAAaaa	FN	49796	0.217517	0.0645743
HG002+HG003+HG004	NovaSeq	60	TRUE	GT	FreeBayes	alldifficult	AAAaaa	FP	45183	0.254554
HG002+HG003+HG004	NovaSeq	60	TRUE	GT	FreeBayes	alldifficult	AAAAaa	FN	68466	0.299071	0.0552815
HG002+HG003+HG004	NovaSeq	60	TRUE	GT	FreeBayes	alldifficult	AAAAaa	FP	48369	0.272503
HG002+HG003+HG004	NovaSeq	60	TRUE	GT	FreeBayes	alldifficult	AAAAAa	FN	42618	0.186163	0.0400061
HG002+HG003+HG004	NovaSeq	60	TRUE	GT	FreeBayes	alldifficult	AAAAAa	FP	47340	0.266706
HG002+HG003+HG004	NovaSeq	60	TRUE	GT	Octopus	alllowmapandsegdup	aaaaaa	FN	4513	0.0689892	0.00552315
HG002+HG003+HG004	NovaSeq	60	TRUE	GT	Octopus	alllowmapandsegdup	aaaaaa	FP	118	0.00197285
HG002+HG003+HG004	NovaSeq	60	TRUE	GT	Octopus	alllowmapandsegdup	Aaaaaa	FN	5899	0.0901767	0.0143839
HG002+HG003+HG004	NovaSeq	60	TRUE	GT	Octopus	alllowmapandsegdup	Aaaaaa	FP	2462	0.0411623
HG002+HG003+HG004	NovaSeq	60	TRUE	GT	Octopus	alllowmapandsegdup	AAaaaa	FN	10213	0.156124	0.0171459
HG002+HG003+HG004	NovaSeq	60	TRUE	GT	Octopus	alllowmapandsegdup	AAaaaa	FP	5639	0.0942787
HG002+HG003+HG004	NovaSeq	60	TRUE	GT	Octopus	alllowmapandsegdup	AAAaaa	FN	14154	0.216369	0.0183546
HG002+HG003+HG004	NovaSeq	60	TRUE	GT	Octopus	alllowmapandsegdup	AAAaaa	FP	10826	0.181
HG002+HG003+HG004	NovaSeq	60	TRUE	GT	Octopus	alllowmapandsegdup	AAAAaa	FN	18414	0.281491	0.014868
HG002+HG003+HG004	NovaSeq	60	TRUE	GT	Octopus	alllowmapandsegdup	AAAAaa	FP	15848	0.264964
HG002+HG003+HG004	NovaSeq	60	TRUE	GT	Octopus	alllowmapandsegdup	AAAAAa	FN	12223	0.18685	0.0114739
HG002+HG003+HG004	NovaSeq	60	TRUE	GT	Octopus	alllowmapandsegdup	AAAAAa	FP	24919	0.416622
HG002+HG003+HG004	NovaSeq	60	TRUE	GT	GATK4	alllowmapandsegdup	aaaaaa	FN	15646	0.138472	0.0191481
HG002+HG003+HG004	NovaSeq	60	TRUE	GT	GATK4	alllowmapandsegdup	aaaaaa	FP	40	0.000653958
HG002+HG003+HG004	NovaSeq	60	TRUE	GT	GATK4	alllowmapandsegdup	Aaaaaa	FN	9029	0.0799097	0.022016
HG002+HG003+HG004	NovaSeq	60	TRUE	GT	GATK4	alllowmapandsegdup	Aaaaaa	FP	2797	0.045728
HG002+HG003+HG004	NovaSeq	60	TRUE	GT	GATK4	alllowmapandsegdup	AAaaaa	FN	15276	0.135198	0.0256458
HG002+HG003+HG004	NovaSeq	60	TRUE	GT	GATK4	alllowmapandsegdup	AAaaaa	FP	7151	0.116911
HG002+HG003+HG004	NovaSeq	60	TRUE	GT	GATK4	alllowmapandsegdup	AAAaaa	FN	21057	0.186362	0.0273062
HG002+HG003+HG004	NovaSeq	60	TRUE	GT	GATK4	alllowmapandsegdup	AAAaaa	FP	13096	0.214106
HG002+HG003+HG004	NovaSeq	60	TRUE	GT	GATK4	alllowmapandsegdup	AAAAaa	FN	28590	0.253031	0.0230844
HG002+HG003+HG004	NovaSeq	60	TRUE	GT	GATK4	alllowmapandsegdup	AAAAaa	FP	15998	0.261551
HG002+HG003+HG004	NovaSeq	60	TRUE	GT	GATK4	alllowmapandsegdup	AAAAAa	FN	23392	0.207027	0.0219584
HG002+HG003+HG004	NovaSeq	60	TRUE	GT	GATK4	alllowmapandsegdup	AAAAAa	FP	22084	0.36105
HG002+HG003+HG004	NovaSeq	60	TRUE	GT	FreeBayes	alllowmapandsegdup	aaaaaa	FN	6215	0.0693801	0.00760611
HG002+HG003+HG004	NovaSeq	60	TRUE	GT	FreeBayes	alllowmapandsegdup	aaaaaa	FP	142	0.00197178
HG002+HG003+HG004	NovaSeq	60	TRUE	GT	FreeBayes	alllowmapandsegdup	Aaaaaa	FN	8310	0.0927673	0.0202629
HG002+HG003+HG004	NovaSeq	60	TRUE	GT	FreeBayes	alllowmapandsegdup	Aaaaaa	FP	2405	0.0333954
HG002+HG003+HG004	NovaSeq	60	TRUE	GT	FreeBayes	alllowmapandsegdup	AAaaaa	FN	13849	0.154601	0.0232501
HG002+HG003+HG004	NovaSeq	60	TRUE	GT	FreeBayes	alllowmapandsegdup	AAaaaa	FP	8750	0.121501
HG002+HG003+HG004	NovaSeq	60	TRUE	GT	FreeBayes	alllowmapandsegdup	AAAaaa	FN	19163	0.213923	0.0248501
HG002+HG003+HG004	NovaSeq	60	TRUE	GT	FreeBayes	alllowmapandsegdup	AAAaaa	FP	15490	0.215091
HG002+HG003+HG004	NovaSeq	60	TRUE	GT	FreeBayes	alllowmapandsegdup	AAAAaa	FN	24807	0.276929	0.0200299
HG002+HG003+HG004	NovaSeq	60	TRUE	GT	FreeBayes	alllowmapandsegdup	AAAAaa	FP	20709	0.287561
HG002+HG003+HG004	NovaSeq	60	TRUE	GT	FreeBayes	alllowmapandsegdup	AAAAAa	FN	17235	0.1924	0.0161787
HG002+HG003+HG004	NovaSeq	60	TRUE	GT	FreeBayes	alllowmapandsegdup	AAAAAa	FP	24520	0.34048
HG002+HG003+HG004	NovaSeq	60	TRUE	GT	Octopus	notinalldifficult	aaaaaa	FN	3395	0.0127004	0.00415491
HG002+HG003+HG004	NovaSeq	60	TRUE	GT	Octopus	notinalldifficult	aaaaaa	FP	124	0.000466323
HG002+HG003+HG004	NovaSeq	60	TRUE	GT	Octopus	notinalldifficult	Aaaaaa	FN	12588	0.0470905	0.0306942
HG002+HG003+HG004	NovaSeq	60	TRUE	GT	Octopus	notinalldifficult	Aaaaaa	FP	20935	0.0787296
HG002+HG003+HG004	NovaSeq	60	TRUE	GT	Octopus	notinalldifficult	AAaaaa	FN	44822	0.167675	0.0752484
HG002+HG003+HG004	NovaSeq	60	TRUE	GT	Octopus	notinalldifficult	AAaaaa	FP	45840	0.172389
HG002+HG003+HG004	NovaSeq	60	TRUE	GT	Octopus	notinalldifficult	AAAaaa	FN	69812	0.26116	0.0905306
HG002+HG003+HG004	NovaSeq	60	TRUE	GT	Octopus	notinalldifficult	AAAaaa	FP	81605	0.30689
HG002+HG003+HG004	NovaSeq	60	TRUE	GT	Octopus	notinalldifficult	AAAAaa	FN	100077	0.374379	0.0808051
HG002+HG003+HG004	NovaSeq	60	TRUE	GT	Octopus	notinalldifficult	AAAAaa	FP	68446	0.257403
HG002+HG003+HG004	NovaSeq	60	TRUE	GT	Octopus	notinalldifficult	AAAAAa	FN	36621	0.136996	0.0343767
HG002+HG003+HG004	NovaSeq	60	TRUE	GT	Octopus	notinalldifficult	AAAAAa	FP	48960	0.184122
HG002+HG003+HG004	NovaSeq	60	TRUE	GT	GATK4	notinalldifficult	aaaaaa	FN	3046	0.00598931	0.00372779
HG002+HG003+HG004	NovaSeq	60	TRUE	GT	GATK4	notinalldifficult	aaaaaa	FP	181	0.000396103
HG002+HG003+HG004	NovaSeq	60	TRUE	GT	GATK4	notinalldifficult	Aaaaaa	FN	24353	0.047885	0.0593816
HG002+HG003+HG004	NovaSeq	60	TRUE	GT	GATK4	notinalldifficult	Aaaaaa	FP	35190	0.0770103
HG002+HG003+HG004	NovaSeq	60	TRUE	GT	GATK4	notinalldifficult	AAaaaa	FN	84231	0.165622	0.141409
HG002+HG003+HG004	NovaSeq	60	TRUE	GT	GATK4	notinalldifficult	AAaaaa	FP	80753	0.176721
HG002+HG003+HG004	NovaSeq	60	TRUE	GT	GATK4	notinalldifficult	AAAaaa	FN	125120	0.246022	0.162253
HG002+HG003+HG004	NovaSeq	60	TRUE	GT	GATK4	notinalldifficult	AAAaaa	FP	138689	0.303509
HG002+HG003+HG004	NovaSeq	60	TRUE	GT	GATK4	notinalldifficult	AAAAaa	FN	169817	0.333909	0.137115
HG002+HG003+HG004	NovaSeq	60	TRUE	GT	GATK4	notinalldifficult	AAAAaa	FP	118438	0.259191
HG002+HG003+HG004	NovaSeq	60	TRUE	GT	GATK4	notinalldifficult	AAAAAa	FN	102006	0.200573	0.0957545
HG002+HG003+HG004	NovaSeq	60	TRUE	GT	GATK4	notinalldifficult	AAAAAa	FP	83701	0.183172
HG002+HG003+HG004	NovaSeq	60	TRUE	GT	FreeBayes	notinalldifficult	aaaaaa	FN	8918	0.0175002	0.0109141
HG002+HG003+HG004	NovaSeq	60	TRUE	GT	FreeBayes	notinalldifficult	aaaaaa	FP	447	0.000915455
HG002+HG003+HG004	NovaSeq	60	TRUE	GT	FreeBayes	notinalldifficult	Aaaaaa	FN	30532	0.0599142	0.0744483
HG002+HG003+HG004	NovaSeq	60	TRUE	GT	FreeBayes	notinalldifficult	Aaaaaa	FP	35580	0.0728677
HG002+HG003+HG004	NovaSeq	60	TRUE	GT	FreeBayes	notinalldifficult	AAaaaa	FN	87715	0.172127	0.147258
HG002+HG003+HG004	NovaSeq	60	TRUE	GT	FreeBayes	notinalldifficult	AAaaaa	FP	86109	0.176351
HG002+HG003+HG004	NovaSeq	60	TRUE	GT	FreeBayes	notinalldifficult	AAAaaa	FN	129183	0.253501	0.167521
HG002+HG003+HG004	NovaSeq	60	TRUE	GT	FreeBayes	notinalldifficult	AAAaaa	FP	148258	0.303632
HG002+HG003+HG004	NovaSeq	60	TRUE	GT	FreeBayes	notinalldifficult	AAAAaa	FN	177430	0.348178	0.143262
HG002+HG003+HG004	NovaSeq	60	TRUE	GT	FreeBayes	notinalldifficult	AAAAaa	FP	128202	0.262557
HG002+HG003+HG004	NovaSeq	60	TRUE	GT	FreeBayes	notinalldifficult	AAAAAa	FN	75817	0.148779	0.0711705
HG002+HG003+HG004	NovaSeq	60	TRUE	GT	FreeBayes	notinalldifficult	AAAAAa	FP	89686	0.183677
HG002+HG003+HG004	NovaSeq	60	TRUE	GT	Octopus	notinalllowmapandsegdup	aaaaaa	FN	4744	0.0141343	0.00580586
HG002+HG003+HG004	NovaSeq	60	TRUE	GT	Octopus	notinalllowmapandsegdup	aaaaaa	FP	797	0.00236006
HG002+HG003+HG004	NovaSeq	60	TRUE	GT	Octopus	notinalllowmapandsegdup	Aaaaaa	FN	16123	0.048037	0.0393138
HG002+HG003+HG004	NovaSeq	60	TRUE	GT	Octopus	notinalllowmapandsegdup	Aaaaaa	FP	26364	0.0780686
HG002+HG003+HG004	NovaSeq	60	TRUE	GT	Octopus	notinalllowmapandsegdup	AAaaaa	FN	55975	0.166772	0.0939723
HG002+HG003+HG004	NovaSeq	60	TRUE	GT	Octopus	notinalllowmapandsegdup	AAaaaa	FP	57363	0.169862
HG002+HG003+HG004	NovaSeq	60	TRUE	GT	Octopus	notinalllowmapandsegdup	AAAaaa	FN	86421	0.257484	0.112069
HG002+HG003+HG004	NovaSeq	60	TRUE	GT	Octopus	notinalllowmapandsegdup	AAAaaa	FP	102017	0.302091
HG002+HG003+HG004	NovaSeq	60	TRUE	GT	Octopus	notinalllowmapandsegdup	AAAAaa	FN	124261	0.370224	0.100332
HG002+HG003+HG004	NovaSeq	60	TRUE	GT	Octopus	notinalllowmapandsegdup	AAAAaa	FP	86875	0.257253
HG002+HG003+HG004	NovaSeq	60	TRUE	GT	Octopus	notinalllowmapandsegdup	AAAAAa	FN	48113	0.143348	0.0451644
HG002+HG003+HG004	NovaSeq	60	TRUE	GT	Octopus	notinalllowmapandsegdup	AAAAAa	FP	64287	0.190365
HG002+HG003+HG004	NovaSeq	60	TRUE	GT	GATK4	notinalllowmapandsegdup	aaaaaa	FN	5255	0.00829198	0.00643123
HG002+HG003+HG004	NovaSeq	60	TRUE	GT	GATK4	notinalllowmapandsegdup	aaaaaa	FP	505	0.000902848
HG002+HG003+HG004	NovaSeq	60	TRUE	GT	GATK4	notinalllowmapandsegdup	Aaaaaa	FN	30286	0.0477889	0.0738485
HG002+HG003+HG004	NovaSeq	60	TRUE	GT	GATK4	notinalllowmapandsegdup	Aaaaaa	FP	43485	0.0777433
HG002+HG003+HG004	NovaSeq	60	TRUE	GT	GATK4	notinalllowmapandsegdup	AAaaaa	FN	102928	0.162412	0.172798
HG002+HG003+HG004	NovaSeq	60	TRUE	GT	GATK4	notinalllowmapandsegdup	AAaaaa	FP	98179	0.175526
HG002+HG003+HG004	NovaSeq	60	TRUE	GT	GATK4	notinalllowmapandsegdup	AAAaaa	FN	152269	0.240269	0.197459
HG002+HG003+HG004	NovaSeq	60	TRUE	GT	GATK4	notinalllowmapandsegdup	AAAaaa	FP	168072	0.300482
HG002+HG003+HG004	NovaSeq	60	TRUE	GT	GATK4	notinalllowmapandsegdup	AAAAaa	FN	207712	0.327753	0.167713
HG002+HG003+HG004	NovaSeq	60	TRUE	GT	GATK4	notinalllowmapandsegdup	AAAAaa	FP	144834	0.258937
HG002+HG003+HG004	NovaSeq	60	TRUE	GT	GATK4	notinalllowmapandsegdup	AAAAAa	FN	135295	0.213485	0.127003
HG002+HG003+HG004	NovaSeq	60	TRUE	GT	GATK4	notinalllowmapandsegdup	AAAAAa	FP	104266	0.186409
HG002+HG003+HG004	NovaSeq	60	TRUE	GT	FreeBayes	notinalllowmapandsegdup	aaaaaa	FN	17904	0.0275948	0.0219115
HG002+HG003+HG004	NovaSeq	60	TRUE	GT	FreeBayes	notinalllowmapandsegdup	aaaaaa	FP	894	0.00152794
HG002+HG003+HG004	NovaSeq	60	TRUE	GT	FreeBayes	notinalllowmapandsegdup	Aaaaaa	FN	39864	0.0614409	0.0972032
HG002+HG003+HG004	NovaSeq	60	TRUE	GT	FreeBayes	notinalllowmapandsegdup	Aaaaaa	FP	42190	0.0721072
HG002+HG003+HG004	NovaSeq	60	TRUE	GT	FreeBayes	notinalllowmapandsegdup	AAaaaa	FN	109081	0.168122	0.183128
HG002+HG003+HG004	NovaSeq	60	TRUE	GT	FreeBayes	notinalllowmapandsegdup	AAaaaa	FP	102296	0.174835
HG002+HG003+HG004	NovaSeq	60	TRUE	GT	FreeBayes	notinalllowmapandsegdup	AAAaaa	FN	159780	0.246263	0.207199
HG002+HG003+HG004	NovaSeq	60	TRUE	GT	FreeBayes	notinalllowmapandsegdup	AAAaaa	FP	175535	0.300008
HG002+HG003+HG004	NovaSeq	60	TRUE	GT	FreeBayes	notinalllowmapandsegdup	AAAAaa	FN	221041	0.340682	0.178475
HG002+HG003+HG004	NovaSeq	60	TRUE	GT	FreeBayes	notinalllowmapandsegdup	AAAAaa	FP	153394	0.262167
HG002+HG003+HG004	NovaSeq	60	TRUE	GT	FreeBayes	notinalllowmapandsegdup	AAAAAa	FN	101149	0.155897	0.09495
HG002+HG003+HG004	NovaSeq	60	TRUE	GT	FreeBayes	notinalllowmapandsegdup	AAAAAa	FP	110792	0.189355
HG002+HG003+HG004	NovaSeq	60	TRUE	GT	Octopus	AllTandemRepeatsandHomopolymers	aaaaaa	FN	1106	0.0226319	0.00135356
HG002+HG003+HG004	NovaSeq	60	TRUE	GT	Octopus	AllTandemRepeatsandHomopolymers	aaaaaa	FP	639	0.0120767
HG002+HG003+HG004	NovaSeq	60	TRUE	GT	Octopus	AllTandemRepeatsandHomopolymers	Aaaaaa	FN	2584	0.0528761	0.00630075
HG002+HG003+HG004	NovaSeq	60	TRUE	GT	Octopus	AllTandemRepeatsandHomopolymers	Aaaaaa	FP	3889	0.0734994
HG002+HG003+HG004	NovaSeq	60	TRUE	GT	Octopus	AllTandemRepeatsandHomopolymers	AAaaaa	FN	7394	0.151302	0.0124132
HG002+HG003+HG004	NovaSeq	60	TRUE	GT	Octopus	AllTandemRepeatsandHomopolymers	AAaaaa	FP	8377	0.158319
HG002+HG003+HG004	NovaSeq	60	TRUE	GT	Octopus	AllTandemRepeatsandHomopolymers	AAAaaa	FN	11821	0.241892	0.0153292
HG002+HG003+HG004	NovaSeq	60	TRUE	GT	Octopus	AllTandemRepeatsandHomopolymers	AAAaaa	FP	14344	0.271092
HG002+HG003+HG004	NovaSeq	60	TRUE	GT	Octopus	AllTandemRepeatsandHomopolymers	AAAAaa	FN	17000	0.347869	0.0137263
HG002+HG003+HG004	NovaSeq	60	TRUE	GT	Octopus	AllTandemRepeatsandHomopolymers	AAAAaa	FP	13690	0.258731
HG002+HG003+HG004	NovaSeq	60	TRUE	GT	Octopus	AllTandemRepeatsandHomopolymers	AAAAAa	FN	8964	0.183429	0.00841463
HG002+HG003+HG004	NovaSeq	60	TRUE	GT	Octopus	AllTandemRepeatsandHomopolymers	AAAAAa	FP	11973	0.226281
HG002+HG003+HG004	NovaSeq	60	TRUE	GT	GATK4	AllTandemRepeatsandHomopolymers	aaaaaa	FN	2011	0.0226563	0.00246112
HG002+HG003+HG004	NovaSeq	60	TRUE	GT	GATK4	AllTandemRepeatsandHomopolymers	aaaaaa	FP	283	0.00412488
HG002+HG003+HG004	NovaSeq	60	TRUE	GT	GATK4	AllTandemRepeatsandHomopolymers	Aaaaaa	FN	4047	0.0455943	0.00986808
HG002+HG003+HG004	NovaSeq	60	TRUE	GT	GATK4	AllTandemRepeatsandHomopolymers	Aaaaaa	FP	5824	0.0848881
HG002+HG003+HG004	NovaSeq	60	TRUE	GT	GATK4	AllTandemRepeatsandHomopolymers	AAaaaa	FN	12101	0.136332	0.0203155
HG002+HG003+HG004	NovaSeq	60	TRUE	GT	GATK4	AllTandemRepeatsandHomopolymers	AAaaaa	FP	11798	0.171962
HG002+HG003+HG004	NovaSeq	60	TRUE	GT	GATK4	AllTandemRepeatsandHomopolymers	AAAaaa	FN	18631	0.209901	0.0241602
HG002+HG003+HG004	NovaSeq	60	TRUE	GT	GATK4	AllTandemRepeatsandHomopolymers	AAAaaa	FP	19545	0.284879
HG002+HG003+HG004	NovaSeq	60	TRUE	GT	GATK4	AllTandemRepeatsandHomopolymers	AAAAaa	FN	25941	0.292257	0.0209455
HG002+HG003+HG004	NovaSeq	60	TRUE	GT	GATK4	AllTandemRepeatsandHomopolymers	AAAAaa	FP	17976	0.26201
HG002+HG003+HG004	NovaSeq	60	TRUE	GT	GATK4	AllTandemRepeatsandHomopolymers	AAAAAa	FN	26030	0.293259	0.0244347
HG002+HG003+HG004	NovaSeq	60	TRUE	GT	GATK4	AllTandemRepeatsandHomopolymers	AAAAAa	FP	13182	0.192135
HG002+HG003+HG004	NovaSeq	60	TRUE	GT	FreeBayes	AllTandemRepeatsandHomopolymers	aaaaaa	FN	7936	0.0774584	0.00971233
HG002+HG003+HG004	NovaSeq	60	TRUE	GT	FreeBayes	AllTandemRepeatsandHomopolymers	aaaaaa	FP	579	0.00818409
HG002+HG003+HG004	NovaSeq	60	TRUE	GT	FreeBayes	AllTandemRepeatsandHomopolymers	Aaaaaa	FN	6880	0.0671514	0.016776
HG002+HG003+HG004	NovaSeq	60	TRUE	GT	FreeBayes	AllTandemRepeatsandHomopolymers	Aaaaaa	FP	4669	0.0659957
HG002+HG003+HG004	NovaSeq	60	TRUE	GT	FreeBayes	AllTandemRepeatsandHomopolymers	AAaaaa	FN	14602	0.142521	0.0245142
HG002+HG003+HG004	NovaSeq	60	TRUE	GT	FreeBayes	AllTandemRepeatsandHomopolymers	AAaaaa	FP	11667	0.164912
HG002+HG003+HG004	NovaSeq	60	TRUE	GT	FreeBayes	AllTandemRepeatsandHomopolymers	AAAaaa	FN	21761	0.212396	0.0282192
HG002+HG003+HG004	NovaSeq	60	TRUE	GT	FreeBayes	AllTandemRepeatsandHomopolymers	AAAaaa	FP	19381	0.273948
HG002+HG003+HG004	NovaSeq	60	TRUE	GT	FreeBayes	AllTandemRepeatsandHomopolymers	AAAAaa	FN	31123	0.303772	0.0251296
HG002+HG003+HG004	NovaSeq	60	TRUE	GT	FreeBayes	AllTandemRepeatsandHomopolymers	AAAAaa	FP	19004	0.268619
HG002+HG003+HG004	NovaSeq	60	TRUE	GT	FreeBayes	AllTandemRepeatsandHomopolymers	AAAAAa	FN	20153	0.196701	0.0189179
HG002+HG003+HG004	NovaSeq	60	TRUE	GT	FreeBayes	AllTandemRepeatsandHomopolymers	AAAAAa	FP	15447	0.218341
HG002+HG003+HG004	NovaSeq	60	TRUE	GT	Octopus	notinAllTandemRepeatsandHomopolymers	aaaaaa	FN	8151	0.023139	0.00997545
HG002+HG003+HG004	NovaSeq	60	TRUE	GT	Octopus	notinAllTandemRepeatsandHomopolymers	aaaaaa	FP	276	0.000800803
HG002+HG003+HG004	NovaSeq	60	TRUE	GT	Octopus	notinAllTandemRepeatsandHomopolymers	Aaaaaa	FN	19438	0.0551805	0.047397
HG002+HG003+HG004	NovaSeq	60	TRUE	GT	Octopus	notinAllTandemRepeatsandHomopolymers	Aaaaaa	FP	24930	0.0723334
HG002+HG003+HG004	NovaSeq	60	TRUE	GT	Octopus	notinAllTandemRepeatsandHomopolymers	AAaaaa	FN	58794	0.166904	0.098705
HG002+HG003+HG004	NovaSeq	60	TRUE	GT	Octopus	notinAllTandemRepeatsandHomopolymers	AAaaaa	FP	54630	0.158507
HG002+HG003+HG004	NovaSeq	60	TRUE	GT	Octopus	notinAllTandemRepeatsandHomopolymers	AAAaaa	FN	88783	0.252037	0.115132
HG002+HG003+HG004	NovaSeq	60	TRUE	GT	Octopus	notinAllTandemRepeatsandHomopolymers	AAAaaa	FP	98514	0.285834
HG002+HG003+HG004	NovaSeq	60	TRUE	GT	Octopus	notinAllTandemRepeatsandHomopolymers	AAAAaa	FN	125713	0.356874	0.101504
HG002+HG003+HG004	NovaSeq	60	TRUE	GT	Octopus	notinAllTandemRepeatsandHomopolymers	AAAAaa	FP	89056	0.258392
HG002+HG003+HG004	NovaSeq	60	TRUE	GT	Octopus	notinAllTandemRepeatsandHomopolymers	AAAAAa	FN	51383	0.145866	0.048234
HG002+HG003+HG004	NovaSeq	60	TRUE	GT	Octopus	notinAllTandemRepeatsandHomopolymers	AAAAAa	FP	77248	0.224132
HG002+HG003+HG004	NovaSeq	60	TRUE	GT	GATK4	notinAllTandemRepeatsandHomopolymers	aaaaaa	FN	18896	0.0287114	0.0231255
HG002+HG003+HG004	NovaSeq	60	TRUE	GT	GATK4	notinAllTandemRepeatsandHomopolymers	aaaaaa	FP	262	0.00047461
HG002+HG003+HG004	NovaSeq	60	TRUE	GT	GATK4	notinAllTandemRepeatsandHomopolymers	Aaaaaa	FN	35274	0.0535969	0.0860111
HG002+HG003+HG004	NovaSeq	60	TRUE	GT	GATK4	notinAllTandemRepeatsandHomopolymers	Aaaaaa	FP	40459	0.073291
HG002+HG003+HG004	NovaSeq	60	TRUE	GT	GATK4	notinAllTandemRepeatsandHomopolymers	AAaaaa	FN	106120	0.161244	0.178157
HG002+HG003+HG004	NovaSeq	60	TRUE	GT	GATK4	notinAllTandemRepeatsandHomopolymers	AAaaaa	FP	93552	0.169468
HG002+HG003+HG004	NovaSeq	60	TRUE	GT	GATK4	notinAllTandemRepeatsandHomopolymers	AAAaaa	FN	154740	0.235119	0.200663
HG002+HG003+HG004	NovaSeq	60	TRUE	GT	GATK4	notinAllTandemRepeatsandHomopolymers	AAAaaa	FP	161658	0.292842
HG002+HG003+HG004	NovaSeq	60	TRUE	GT	GATK4	notinAllTandemRepeatsandHomopolymers	AAAAaa	FN	210415	0.319714	0.169895
HG002+HG003+HG004	NovaSeq	60	TRUE	GT	GATK4	notinAllTandemRepeatsandHomopolymers	AAAAaa	FP	142905	0.258871
HG002+HG003+HG004	NovaSeq	60	TRUE	GT	GATK4	notinAllTandemRepeatsandHomopolymers	AAAAAa	FN	132690	0.201615	0.124558
HG002+HG003+HG004	NovaSeq	60	TRUE	GT	GATK4	notinAllTandemRepeatsandHomopolymers	AAAAAa	FP	113196	0.205053
HG002+HG003+HG004	NovaSeq	60	TRUE	GT	FreeBayes	notinAllTandemRepeatsandHomopolymers	aaaaaa	FN	16175	0.0254272	0.0197955
HG002+HG003+HG004	NovaSeq	60	TRUE	GT	FreeBayes	notinAllTandemRepeatsandHomopolymers	aaaaaa	FP	618	0.00103725
HG002+HG003+HG004	NovaSeq	60	TRUE	GT	FreeBayes	notinAllTandemRepeatsandHomopolymers	Aaaaaa	FN	41298	0.0649207	0.1007
HG002+HG003+HG004	NovaSeq	60	TRUE	GT	FreeBayes	notinAllTandemRepeatsandHomopolymers	Aaaaaa	FP	40524	0.0680155
HG002+HG003+HG004	NovaSeq	60	TRUE	GT	FreeBayes	notinAllTandemRepeatsandHomopolymers	AAaaaa	FN	108351	0.170328	0.181903
HG002+HG003+HG004	NovaSeq	60	TRUE	GT	FreeBayes	notinAllTandemRepeatsandHomopolymers	AAaaaa	FP	100847	0.169262
HG002+HG003+HG004	NovaSeq	60	TRUE	GT	FreeBayes	notinAllTandemRepeatsandHomopolymers	AAAaaa	FN	157226	0.24716	0.203887
HG002+HG003+HG004	NovaSeq	60	TRUE	GT	FreeBayes	notinAllTandemRepeatsandHomopolymers	AAAaaa	FP	174299	0.292544
HG002+HG003+HG004	NovaSeq	60	TRUE	GT	FreeBayes	notinAllTandemRepeatsandHomopolymers	AAAAaa	FN	214788	0.337648	0.173426
HG002+HG003+HG004	NovaSeq	60	TRUE	GT	FreeBayes	notinAllTandemRepeatsandHomopolymers	AAAAaa	FP	157784	0.264825
HG002+HG003+HG004	NovaSeq	60	TRUE	GT	FreeBayes	notinAllTandemRepeatsandHomopolymers	AAAAAa	FN	98292	0.154516	0.0922681
HG002+HG003+HG004	NovaSeq	60	TRUE	GT	FreeBayes	notinAllTandemRepeatsandHomopolymers	AAAAAa	FP	121733	0.204317
HG002+HG003+HG004	NovaSeq	70	TRUE	GT	Octopus	genome	aaaaaa	FN	7948	0.0245739	0.00972701
HG002+HG003+HG004	NovaSeq	70	TRUE	GT	Octopus	genome	aaaaaa	FP	661	0.00202965
HG002+HG003+HG004	NovaSeq	70	TRUE	GT	Octopus	genome	Aaaaaa	FN	17986	0.0556098	0.0438565
HG002+HG003+HG004	NovaSeq	70	TRUE	GT	Octopus	genome	Aaaaaa	FP	22230	0.0682589
HG002+HG003+HG004	NovaSeq	70	TRUE	GT	Octopus	genome	AAaaaa	FN	53693	0.16601	0.0901413
HG002+HG003+HG004	NovaSeq	70	TRUE	GT	Octopus	genome	AAaaaa	FP	50262	0.154333
HG002+HG003+HG004	NovaSeq	70	TRUE	GT	Octopus	genome	AAAaaa	FN	82392	0.254743	0.106844
HG002+HG003+HG004	NovaSeq	70	TRUE	GT	Octopus	genome	AAAaaa	FP	90910	0.279146
HG002+HG003+HG004	NovaSeq	70	TRUE	GT	Octopus	genome	AAAAaa	FN	114789	0.354909	0.092684
HG002+HG003+HG004	NovaSeq	70	TRUE	GT	Octopus	genome	AAAAaa	FP	83999	0.257925
HG002+HG003+HG004	NovaSeq	70	TRUE	GT	Octopus	genome	AAAAAa	FN	46624	0.144154	0.0437666
HG002+HG003+HG004	NovaSeq	70	TRUE	GT	Octopus	genome	AAAAAa	FP	77610	0.238307
HG002+HG003+HG004	NovaSeq	70	TRUE	GT	GATK4	genome	aaaaaa	FN	20485	0.0322864	0.0250702
HG002+HG003+HG004	NovaSeq	70	TRUE	GT	GATK4	genome	aaaaaa	FP	315	0.000600561
HG002+HG003+HG004	NovaSeq	70	TRUE	GT	GATK4	genome	Aaaaaa	FN	33397	0.0526371	0.0814342
HG002+HG003+HG004	NovaSeq	70	TRUE	GT	GATK4	genome	Aaaaaa	FP	37973	0.0723971
HG002+HG003+HG004	NovaSeq	70	TRUE	GT	GATK4	genome	AAaaaa	FN	100403	0.158245	0.168559
HG002+HG003+HG004	NovaSeq	70	TRUE	GT	GATK4	genome	AAaaaa	FP	88741	0.169188
HG002+HG003+HG004	NovaSeq	70	TRUE	GT	GATK4	genome	AAAaaa	FN	149472	0.235583	0.193832
HG002+HG003+HG004	NovaSeq	70	TRUE	GT	GATK4	genome	AAAaaa	FP	154325	0.294227
HG002+HG003+HG004	NovaSeq	70	TRUE	GT	GATK4	genome	AAAAaa	FN	199713	0.314768	0.161254
HG002+HG003+HG004	NovaSeq	70	TRUE	GT	GATK4	genome	AAAAaa	FP	136139	0.259555
HG002+HG003+HG004	NovaSeq	70	TRUE	GT	GATK4	genome	AAAAAa	FN	131007	0.20648	0.122978
HG002+HG003+HG004	NovaSeq	70	TRUE	GT	GATK4	genome	AAAAAa	FP	107017	0.204032
HG002+HG003+HG004	NovaSeq	70	TRUE	GT	FreeBayes	genome	aaaaaa	FN	21921	0.0348119	0.0268276
HG002+HG003+HG004	NovaSeq	70	TRUE	GT	FreeBayes	genome	aaaaaa	FP	733	0.00128828
HG002+HG003+HG004	NovaSeq	70	TRUE	GT	FreeBayes	genome	Aaaaaa	FN	40804	0.0647992	0.0994953
HG002+HG003+HG004	NovaSeq	70	TRUE	GT	FreeBayes	genome	Aaaaaa	FP	36983	0.0649992
HG002+HG003+HG004	NovaSeq	70	TRUE	GT	FreeBayes	genome	AAaaaa	FN	106138	0.168554	0.178187
HG002+HG003+HG004	NovaSeq	70	TRUE	GT	FreeBayes	genome	AAaaaa	FP	95471	0.167794
HG002+HG003+HG004	NovaSeq	70	TRUE	GT	FreeBayes	genome	AAAaaa	FN	156739	0.248911	0.203255
HG002+HG003+HG004	NovaSeq	70	TRUE	GT	FreeBayes	genome	AAAaaa	FP	165172	0.290297
HG002+HG003+HG004	NovaSeq	70	TRUE	GT	FreeBayes	genome	AAAAaa	FN	209958	0.333426	0.169526
HG002+HG003+HG004	NovaSeq	70	TRUE	GT	FreeBayes	genome	AAAAaa	FP	151718	0.266651
HG002+HG003+HG004	NovaSeq	70	TRUE	GT	FreeBayes	genome	AAAAAa	FN	94139	0.149498	0.0883696
HG002+HG003+HG004	NovaSeq	70	TRUE	GT	FreeBayes	genome	AAAAAa	FP	118899	0.20897
HG002+HG003+HG004	NovaSeq	70	TRUE	GT	Octopus	alldifficult	aaaaaa	FN	5464	0.047228	0.00668701
HG002+HG003+HG004	NovaSeq	70	TRUE	GT	Octopus	alldifficult	aaaaaa	FP	612	0.00525065
HG002+HG003+HG004	NovaSeq	70	TRUE	GT	Octopus	alldifficult	Aaaaaa	FN	8477	0.0732709	0.0206701
HG002+HG003+HG004	NovaSeq	70	TRUE	GT	Octopus	alldifficult	Aaaaaa	FP	6458	0.0554064
HG002+HG003+HG004	NovaSeq	70	TRUE	GT	Octopus	alldifficult	AAaaaa	FN	18726	0.161858	0.0314377
HG002+HG003+HG004	NovaSeq	70	TRUE	GT	Octopus	alldifficult	AAaaaa	FP	14469	0.124137
HG002+HG003+HG004	NovaSeq	70	TRUE	GT	Octopus	alldifficult	AAAaaa	FN	26872	0.232268	0.034847
HG002+HG003+HG004	NovaSeq	70	TRUE	GT	Octopus	alldifficult	AAAaaa	FP	26393	0.226439
HG002+HG003+HG004	NovaSeq	70	TRUE	GT	Octopus	alldifficult	AAAAaa	FN	36447	0.315029	0.0294284
HG002+HG003+HG004	NovaSeq	70	TRUE	GT	Octopus	alldifficult	AAAAaa	FP	30111	0.258337
HG002+HG003+HG004	NovaSeq	70	TRUE	GT	Octopus	alldifficult	AAAAAa	FN	19708	0.170346	0.0185002
HG002+HG003+HG004	NovaSeq	70	TRUE	GT	Octopus	alldifficult	AAAAAa	FP	38514	0.330431
HG002+HG003+HG004	NovaSeq	70	TRUE	GT	GATK4	alldifficult	aaaaaa	FN	17603	0.0820856	0.0215431
HG002+HG003+HG004	NovaSeq	70	TRUE	GT	GATK4	alldifficult	aaaaaa	FP	252	0.00175484
HG002+HG003+HG004	NovaSeq	70	TRUE	GT	GATK4	alldifficult	Aaaaaa	FN	13587	0.0633583	0.0331301
HG002+HG003+HG004	NovaSeq	70	TRUE	GT	GATK4	alldifficult	Aaaaaa	FP	9154	0.0637452
HG002+HG003+HG004	NovaSeq	70	TRUE	GT	GATK4	alldifficult	AAaaaa	FN	30349	0.141522	0.0509507
HG002+HG003+HG004	NovaSeq	70	TRUE	GT	GATK4	alldifficult	AAaaaa	FP	21108	0.146989
HG002+HG003+HG004	NovaSeq	70	TRUE	GT	GATK4	alldifficult	AAAaaa	FN	43470	0.202707	0.0563709
HG002+HG003+HG004	NovaSeq	70	TRUE	GT	GATK4	alldifficult	AAAaaa	FP	37090	0.258282
HG002+HG003+HG004	NovaSeq	70	TRUE	GT	GATK4	alldifficult	AAAAaa	FN	58933	0.274814	0.0475843
HG002+HG003+HG004	NovaSeq	70	TRUE	GT	GATK4	alldifficult	AAAAaa	FP	37400	0.26044
HG002+HG003+HG004	NovaSeq	70	TRUE	GT	GATK4	alldifficult	AAAAAa	FN	50505	0.235513	0.0474098
HG002+HG003+HG004	NovaSeq	70	TRUE	GT	GATK4	alldifficult	AAAAAa	FP	38599	0.26879
HG002+HG003+HG004	NovaSeq	70	TRUE	GT	FreeBayes	alldifficult	aaaaaa	FN	14265	0.0700305	0.017458
HG002+HG003+HG004	NovaSeq	70	TRUE	GT	FreeBayes	alldifficult	aaaaaa	FP	576	0.00357493
HG002+HG003+HG004	NovaSeq	70	TRUE	GT	FreeBayes	alldifficult	Aaaaaa	FN	15781	0.0774729	0.0384799
HG002+HG003+HG004	NovaSeq	70	TRUE	GT	FreeBayes	alldifficult	Aaaaaa	FP	8117	0.050378
HG002+HG003+HG004	NovaSeq	70	TRUE	GT	FreeBayes	alldifficult	AAaaaa	FN	31867	0.156443	0.0534992
HG002+HG003+HG004	NovaSeq	70	TRUE	GT	FreeBayes	alldifficult	AAaaaa	FP	23146	0.143655
HG002+HG003+HG004	NovaSeq	70	TRUE	GT	FreeBayes	alldifficult	AAAaaa	FN	45184	0.22182	0.0585935
HG002+HG003+HG004	NovaSeq	70	TRUE	GT	FreeBayes	alldifficult	AAAaaa	FP	40313	0.250202
HG002+HG003+HG004	NovaSeq	70	TRUE	GT	FreeBayes	alldifficult	AAAAaa	FN	61020	0.299563	0.0492694
HG002+HG003+HG004	NovaSeq	70	TRUE	GT	FreeBayes	alldifficult	AAAAaa	FP	43872	0.272291
HG002+HG003+HG004	NovaSeq	70	TRUE	GT	FreeBayes	alldifficult	AAAAAa	FN	35580	0.174671	0.0333995
HG002+HG003+HG004	NovaSeq	70	TRUE	GT	FreeBayes	alldifficult	AAAAAa	FP	45098	0.2799
HG002+HG003+HG004	NovaSeq	70	TRUE	GT	Octopus	alllowmapandsegdup	aaaaaa	FN	4372	0.0723135	0.00535059
HG002+HG003+HG004	NovaSeq	70	TRUE	GT	Octopus	alllowmapandsegdup	aaaaaa	FP	89	0.00154011
HG002+HG003+HG004	NovaSeq	70	TRUE	GT	Octopus	alllowmapandsegdup	Aaaaaa	FN	5710	0.0944442	0.0139231
HG002+HG003+HG004	NovaSeq	70	TRUE	GT	Octopus	alllowmapandsegdup	Aaaaaa	FP	2125	0.0367723
HG002+HG003+HG004	NovaSeq	70	TRUE	GT	Octopus	alllowmapandsegdup	AAaaaa	FN	9581	0.158471	0.0160848
HG002+HG003+HG004	NovaSeq	70	TRUE	GT	Octopus	alllowmapandsegdup	AAaaaa	FP	5098	0.088219
HG002+HG003+HG004	NovaSeq	70	TRUE	GT	Octopus	alllowmapandsegdup	AAAaaa	FN	13152	0.217536	0.0170552
HG002+HG003+HG004	NovaSeq	70	TRUE	GT	Octopus	alllowmapandsegdup	AAAaaa	FP	9837	0.170226
HG002+HG003+HG004	NovaSeq	70	TRUE	GT	Octopus	alllowmapandsegdup	AAAAaa	FN	16869	0.279016	0.0136205
HG002+HG003+HG004	NovaSeq	70	TRUE	GT	Octopus	alllowmapandsegdup	AAAAaa	FP	15033	0.260141
HG002+HG003+HG004	NovaSeq	70	TRUE	GT	Octopus	alllowmapandsegdup	AAAAAa	FN	10775	0.17822	0.0101146
HG002+HG003+HG004	NovaSeq	70	TRUE	GT	Octopus	alllowmapandsegdup	AAAAAa	FP	25606	0.443102
HG002+HG003+HG004	NovaSeq	70	TRUE	GT	GATK4	alllowmapandsegdup	aaaaaa	FN	15625	0.146064	0.0191224
HG002+HG003+HG004	NovaSeq	70	TRUE	GT	GATK4	alllowmapandsegdup	aaaaaa	FP	35	0.000622399
HG002+HG003+HG004	NovaSeq	70	TRUE	GT	GATK4	alllowmapandsegdup	Aaaaaa	FN	8620	0.0805803	0.0210188
HG002+HG003+HG004	NovaSeq	70	TRUE	GT	GATK4	alllowmapandsegdup	Aaaaaa	FP	2358	0.0419319
HG002+HG003+HG004	NovaSeq	70	TRUE	GT	GATK4	alllowmapandsegdup	AAaaaa	FN	14368	0.134313	0.0241214
HG002+HG003+HG004	NovaSeq	70	TRUE	GT	GATK4	alllowmapandsegdup	AAaaaa	FP	6229	0.110769
HG002+HG003+HG004	NovaSeq	70	TRUE	GT	GATK4	alllowmapandsegdup	AAAaaa	FN	19933	0.186335	0.0258486
HG002+HG003+HG004	NovaSeq	70	TRUE	GT	GATK4	alllowmapandsegdup	AAAaaa	FP	11803	0.209891
HG002+HG003+HG004	NovaSeq	70	TRUE	GT	GATK4	alllowmapandsegdup	AAAAaa	FN	26763	0.250182	0.0216092
HG002+HG003+HG004	NovaSeq	70	TRUE	GT	GATK4	alllowmapandsegdup	AAAAaa	FP	14826	0.263648
HG002+HG003+HG004	NovaSeq	70	TRUE	GT	GATK4	alllowmapandsegdup	AAAAAa	FN	21665	0.202526	0.0203372
HG002+HG003+HG004	NovaSeq	70	TRUE	GT	GATK4	alllowmapandsegdup	AAAAAa	FP	20983	0.373137
HG002+HG003+HG004	NovaSeq	70	TRUE	GT	FreeBayes	alllowmapandsegdup	aaaaaa	FN	5943	0.0715154	0.00727323
HG002+HG003+HG004	NovaSeq	70	TRUE	GT	FreeBayes	alllowmapandsegdup	aaaaaa	FP	125	0.00181747
HG002+HG003+HG004	NovaSeq	70	TRUE	GT	FreeBayes	alllowmapandsegdup	Aaaaaa	FN	7792	0.0937654	0.0189998
HG002+HG003+HG004	NovaSeq	70	TRUE	GT	FreeBayes	alllowmapandsegdup	Aaaaaa	FP	2027	0.0294721
HG002+HG003+HG004	NovaSeq	70	TRUE	GT	FreeBayes	alllowmapandsegdup	AAaaaa	FN	13107	0.157724	0.0220044
HG002+HG003+HG004	NovaSeq	70	TRUE	GT	FreeBayes	alllowmapandsegdup	AAaaaa	FP	7938	0.115416
HG002+HG003+HG004	NovaSeq	70	TRUE	GT	FreeBayes	alllowmapandsegdup	AAAaaa	FN	18046	0.217157	0.0234016
HG002+HG003+HG004	NovaSeq	70	TRUE	GT	FreeBayes	alllowmapandsegdup	AAAaaa	FP	14395	0.2093
HG002+HG003+HG004	NovaSeq	70	TRUE	GT	FreeBayes	alllowmapandsegdup	AAAAaa	FN	22911	0.275701	0.018499
HG002+HG003+HG004	NovaSeq	70	TRUE	GT	FreeBayes	alllowmapandsegdup	AAAAaa	FP	19668	0.285968
HG002+HG003+HG004	NovaSeq	70	TRUE	GT	FreeBayes	alllowmapandsegdup	AAAAAa	FN	15302	0.184137	0.0143642
HG002+HG003+HG004	NovaSeq	70	TRUE	GT	FreeBayes	alllowmapandsegdup	AAAAAa	FP	24624	0.358027
HG002+HG003+HG004	NovaSeq	70	TRUE	GT	Octopus	notinalldifficult	aaaaaa	FN	2486	0.0119647	0.00304244
HG002+HG003+HG004	NovaSeq	70	TRUE	GT	Octopus	notinalldifficult	aaaaaa	FP	49	0.000234263
HG002+HG003+HG004	NovaSeq	70	TRUE	GT	Octopus	notinalldifficult	Aaaaaa	FN	9511	0.0457748	0.0231913
HG002+HG003+HG004	NovaSeq	70	TRUE	GT	Octopus	notinalldifficult	Aaaaaa	FP	15768	0.0753847
HG002+HG003+HG004	NovaSeq	70	TRUE	GT	Octopus	notinalldifficult	AAaaaa	FN	34964	0.168276	0.0586985
HG002+HG003+HG004	NovaSeq	70	TRUE	GT	Octopus	notinalldifficult	AAaaaa	FP	35789	0.171103
HG002+HG003+HG004	NovaSeq	70	TRUE	GT	Octopus	notinalldifficult	AAAaaa	FN	55532	0.267266	0.0720126
HG002+HG003+HG004	NovaSeq	70	TRUE	GT	Octopus	notinalldifficult	AAAaaa	FP	64520	0.308462
HG002+HG003+HG004	NovaSeq	70	TRUE	GT	Octopus	notinalldifficult	AAAAaa	FN	78363	0.377148	0.0632726
HG002+HG003+HG004	NovaSeq	70	TRUE	GT	Octopus	notinalldifficult	AAAAaa	FP	53899	0.257684
HG002+HG003+HG004	NovaSeq	70	TRUE	GT	Octopus	notinalldifficult	AAAAAa	FN	26922	0.129571	0.0252721
HG002+HG003+HG004	NovaSeq	70	TRUE	GT	Octopus	notinalldifficult	AAAAAa	FP	39142	0.187133
HG002+HG003+HG004	NovaSeq	70	TRUE	GT	GATK4	notinalldifficult	aaaaaa	FN	2879	0.00685342	0.00352341
HG002+HG003+HG004	NovaSeq	70	TRUE	GT	GATK4	notinalldifficult	aaaaaa	FP	63	0.000165374
HG002+HG003+HG004	NovaSeq	70	TRUE	GT	GATK4	notinalldifficult	Aaaaaa	FN	19809	0.0471551	0.0483017
HG002+HG003+HG004	NovaSeq	70	TRUE	GT	GATK4	notinalldifficult	Aaaaaa	FP	28815	0.0756391
HG002+HG003+HG004	NovaSeq	70	TRUE	GT	GATK4	notinalldifficult	AAaaaa	FN	70052	0.166758	0.117605
HG002+HG003+HG004	NovaSeq	70	TRUE	GT	GATK4	notinalldifficult	AAaaaa	FP	67629	0.177525
HG002+HG003+HG004	NovaSeq	70	TRUE	GT	GATK4	notinalldifficult	AAAaaa	FN	106016	0.25237	0.137479
HG002+HG003+HG004	NovaSeq	70	TRUE	GT	GATK4	notinalldifficult	AAAaaa	FP	117248	0.307775
HG002+HG003+HG004	NovaSeq	70	TRUE	GT	GATK4	notinalldifficult	AAAAaa	FN	140813	0.335204	0.113697
HG002+HG003+HG004	NovaSeq	70	TRUE	GT	GATK4	notinalldifficult	AAAAaa	FP	98762	0.259249
HG002+HG003+HG004	NovaSeq	70	TRUE	GT	GATK4	notinalldifficult	AAAAAa	FN	80513	0.19166	0.0755787
HG002+HG003+HG004	NovaSeq	70	TRUE	GT	GATK4	notinalldifficult	AAAAAa	FP	68437	0.179646
HG002+HG003+HG004	NovaSeq	70	TRUE	GT	FreeBayes	notinalldifficult	aaaaaa	FN	7623	0.0178915	0.00932927
HG002+HG003+HG004	NovaSeq	70	TRUE	GT	FreeBayes	notinalldifficult	aaaaaa	FP	269	0.000647673
HG002+HG003+HG004	NovaSeq	70	TRUE	GT	FreeBayes	notinalldifficult	Aaaaaa	FN	25020	0.0587229	0.061008
HG002+HG003+HG004	NovaSeq	70	TRUE	GT	FreeBayes	notinalldifficult	Aaaaaa	FP	29341	0.0706445
HG002+HG003+HG004	NovaSeq	70	TRUE	GT	FreeBayes	notinalldifficult	AAaaaa	FN	74270	0.174314	0.124686
HG002+HG003+HG004	NovaSeq	70	TRUE	GT	FreeBayes	notinalldifficult	AAaaaa	FP	73458	0.176865
HG002+HG003+HG004	NovaSeq	70	TRUE	GT	FreeBayes	notinalldifficult	AAAaaa	FN	111583	0.26189	0.144698
HG002+HG003+HG004	NovaSeq	70	TRUE	GT	FreeBayes	notinalldifficult	AAAaaa	FP	126951	0.305661
HG002+HG003+HG004	NovaSeq	70	TRUE	GT	FreeBayes	notinalldifficult	AAAAaa	FN	148978	0.349657	0.120289
HG002+HG003+HG004	NovaSeq	70	TRUE	GT	FreeBayes	notinalldifficult	AAAAaa	FP	109967	0.264768
HG002+HG003+HG004	NovaSeq	70	TRUE	GT	FreeBayes	notinalldifficult	AAAAAa	FN	58595	0.137525	0.055004
HG002+HG003+HG004	NovaSeq	70	TRUE	GT	FreeBayes	notinalldifficult	AAAAAa	FP	75347	0.181413
HG002+HG003+HG004	NovaSeq	70	TRUE	GT	Octopus	notinalllowmapandsegdup	aaaaaa	FN	3576	0.013599	0.00437642
HG002+HG003+HG004	NovaSeq	70	TRUE	GT	Octopus	notinalllowmapandsegdup	aaaaaa	FP	572	0.00213518
HG002+HG003+HG004	NovaSeq	70	TRUE	GT	Octopus	notinalllowmapandsegdup	Aaaaaa	FN	12275	0.0466801	0.029931
HG002+HG003+HG004	NovaSeq	70	TRUE	GT	Octopus	notinalllowmapandsegdup	Aaaaaa	FP	20106	0.0750524
HG002+HG003+HG004	NovaSeq	70	TRUE	GT	Octopus	notinalllowmapandsegdup	AAaaaa	FN	44110	0.167744	0.0740531
HG002+HG003+HG004	NovaSeq	70	TRUE	GT	Octopus	notinalllowmapandsegdup	AAaaaa	FP	45160	0.168575
HG002+HG003+HG004	NovaSeq	70	TRUE	GT	Octopus	notinalllowmapandsegdup	AAAaaa	FN	69235	0.263291	0.0897823
HG002+HG003+HG004	NovaSeq	70	TRUE	GT	Octopus	notinalllowmapandsegdup	AAAaaa	FP	81069	0.302617
HG002+HG003+HG004	NovaSeq	70	TRUE	GT	Octopus	notinalllowmapandsegdup	AAAAaa	FN	97915	0.372357	0.0790595
HG002+HG003+HG004	NovaSeq	70	TRUE	GT	Octopus	notinalllowmapandsegdup	AAAAaa	FP	68959	0.257412
HG002+HG003+HG004	NovaSeq	70	TRUE	GT	Octopus	notinalllowmapandsegdup	AAAAAa	FN	35849	0.136329	0.033652
HG002+HG003+HG004	NovaSeq	70	TRUE	GT	Octopus	notinalllowmapandsegdup	AAAAAa	FP	52027	0.194208
HG002+HG003+HG004	NovaSeq	70	TRUE	GT	GATK4	notinalllowmapandsegdup	aaaaaa	FN	4855	0.0092043	0.0059417
HG002+HG003+HG004	NovaSeq	70	TRUE	GT	GATK4	notinalllowmapandsegdup	aaaaaa	FP	280	0.000597974
HG002+HG003+HG004	NovaSeq	70	TRUE	GT	GATK4	notinalllowmapandsegdup	Aaaaaa	FN	24773	0.0469656	0.0604057
HG002+HG003+HG004	NovaSeq	70	TRUE	GT	GATK4	notinalllowmapandsegdup	Aaaaaa	FP	35614	0.076058
HG002+HG003+HG004	NovaSeq	70	TRUE	GT	GATK4	notinalllowmapandsegdup	AAaaaa	FN	86026	0.163091	0.144423
HG002+HG003+HG004	NovaSeq	70	TRUE	GT	GATK4	notinalllowmapandsegdup	AAaaaa	FP	82502	0.176193
HG002+HG003+HG004	NovaSeq	70	TRUE	GT	GATK4	notinalllowmapandsegdup	AAAaaa	FN	129532	0.245572	0.167974
HG002+HG003+HG004	NovaSeq	70	TRUE	GT	GATK4	notinalllowmapandsegdup	AAAaaa	FP	142511	0.304349
HG002+HG003+HG004	NovaSeq	70	TRUE	GT	GATK4	notinalllowmapandsegdup	AAAAaa	FN	172948	0.327882	0.139643
HG002+HG003+HG004	NovaSeq	70	TRUE	GT	GATK4	notinalllowmapandsegdup	AAAAaa	FP	121306	0.259064
HG002+HG003+HG004	NovaSeq	70	TRUE	GT	GATK4	notinalllowmapandsegdup	AAAAAa	FN	109337	0.207285	0.102636
HG002+HG003+HG004	NovaSeq	70	TRUE	GT	GATK4	notinalllowmapandsegdup	AAAAAa	FP	86035	0.183738
HG002+HG003+HG004	NovaSeq	70	TRUE	GT	FreeBayes	notinalllowmapandsegdup	aaaaaa	FN	15963	0.0292066	0.019536
HG002+HG003+HG004	NovaSeq	70	TRUE	GT	FreeBayes	notinalllowmapandsegdup	aaaaaa	FP	610	0.00121892
HG002+HG003+HG004	NovaSeq	70	TRUE	GT	FreeBayes	notinalllowmapandsegdup	Aaaaaa	FN	33009	0.0603948	0.0804882
HG002+HG003+HG004	NovaSeq	70	TRUE	GT	FreeBayes	notinalllowmapandsegdup	Aaaaaa	FP	34964	0.0698661
HG002+HG003+HG004	NovaSeq	70	TRUE	GT	FreeBayes	notinalllowmapandsegdup	AAaaaa	FN	93022	0.170197	0.156168
HG002+HG003+HG004	NovaSeq	70	TRUE	GT	FreeBayes	notinalllowmapandsegdup	AAaaaa	FP	87567	0.174979
HG002+HG003+HG004	NovaSeq	70	TRUE	GT	FreeBayes	notinalllowmapandsegdup	AAAaaa	FN	138680	0.253735	0.179837
HG002+HG003+HG004	NovaSeq	70	TRUE	GT	FreeBayes	notinalllowmapandsegdup	AAAaaa	FP	150844	0.301421
HG002+HG003+HG004	NovaSeq	70	TRUE	GT	FreeBayes	notinalllowmapandsegdup	AAAAaa	FN	187041	0.342219	0.151022
HG002+HG003+HG004	NovaSeq	70	TRUE	GT	FreeBayes	notinalllowmapandsegdup	AAAAaa	FP	132113	0.263992
HG002+HG003+HG004	NovaSeq	70	TRUE	GT	FreeBayes	notinalllowmapandsegdup	AAAAAa	FN	78839	0.144247	0.0740073
HG002+HG003+HG004	NovaSeq	70	TRUE	GT	FreeBayes	notinalllowmapandsegdup	AAAAAa	FP	94345	0.188523
HG002+HG003+HG004	NovaSeq	70	TRUE	GT	Octopus	AllTandemRepeatsandHomopolymers	aaaaaa	FN	894	0.0224821	0.00109411
HG002+HG003+HG004	NovaSeq	70	TRUE	GT	Octopus	AllTandemRepeatsandHomopolymers	aaaaaa	FP	496	0.0113413
HG002+HG003+HG004	NovaSeq	70	TRUE	GT	Octopus	AllTandemRepeatsandHomopolymers	Aaaaaa	FN	2059	0.0517792	0.0050206
HG002+HG003+HG004	NovaSeq	70	TRUE	GT	Octopus	AllTandemRepeatsandHomopolymers	Aaaaaa	FP	3141	0.0718206
HG002+HG003+HG004	NovaSeq	70	TRUE	GT	Octopus	AllTandemRepeatsandHomopolymers	AAaaaa	FN	6020	0.151389	0.0101065
HG002+HG003+HG004	NovaSeq	70	TRUE	GT	Octopus	AllTandemRepeatsandHomopolymers	AAaaaa	FP	6910	0.158001
HG002+HG003+HG004	NovaSeq	70	TRUE	GT	Octopus	AllTandemRepeatsandHomopolymers	AAAaaa	FN	9836	0.247353	0.0127551
HG002+HG003+HG004	NovaSeq	70	TRUE	GT	Octopus	AllTandemRepeatsandHomopolymers	AAAaaa	FP	11672	0.266886
HG002+HG003+HG004	NovaSeq	70	TRUE	GT	Octopus	AllTandemRepeatsandHomopolymers	AAAAaa	FN	13881	0.349076	0.0112079
HG002+HG003+HG004	NovaSeq	70	TRUE	GT	Octopus	AllTandemRepeatsandHomopolymers	AAAAaa	FP	11322	0.258883
HG002+HG003+HG004	NovaSeq	70	TRUE	GT	Octopus	AllTandemRepeatsandHomopolymers	AAAAAa	FN	7075	0.17792	0.0066414
HG002+HG003+HG004	NovaSeq	70	TRUE	GT	Octopus	AllTandemRepeatsandHomopolymers	AAAAAa	FP	10193	0.233068
HG002+HG003+HG004	NovaSeq	70	TRUE	GT	GATK4	AllTandemRepeatsandHomopolymers	aaaaaa	FN	1791	0.0233246	0.00219188
HG002+HG003+HG004	NovaSeq	70	TRUE	GT	GATK4	AllTandemRepeatsandHomopolymers	aaaaaa	FP	184	0.00314961
HG002+HG003+HG004	NovaSeq	70	TRUE	GT	GATK4	AllTandemRepeatsandHomopolymers	Aaaaaa	FN	3407	0.0443701	0.00830753
HG002+HG003+HG004	NovaSeq	70	TRUE	GT	GATK4	AllTandemRepeatsandHomopolymers	Aaaaaa	FP	4766	0.0815817
HG002+HG003+HG004	NovaSeq	70	TRUE	GT	GATK4	AllTandemRepeatsandHomopolymers	AAaaaa	FN	10299	0.134126	0.0172902
HG002+HG003+HG004	NovaSeq	70	TRUE	GT	GATK4	AllTandemRepeatsandHomopolymers	AAaaaa	FP	10101	0.172903
HG002+HG003+HG004	NovaSeq	70	TRUE	GT	GATK4	AllTandemRepeatsandHomopolymers	AAAaaa	FN	16152	0.210351	0.0209455
HG002+HG003+HG004	NovaSeq	70	TRUE	GT	GATK4	AllTandemRepeatsandHomopolymers	AAAaaa	FP	16751	0.286734
HG002+HG003+HG004	NovaSeq	70	TRUE	GT	GATK4	AllTandemRepeatsandHomopolymers	AAAAaa	FN	22029	0.286888	0.0177869
HG002+HG003+HG004	NovaSeq	70	TRUE	GT	GATK4	AllTandemRepeatsandHomopolymers	AAAAaa	FP	15431	0.264139
HG002+HG003+HG004	NovaSeq	70	TRUE	GT	GATK4	AllTandemRepeatsandHomopolymers	AAAAAa	FN	23108	0.30094	0.0216918
HG002+HG003+HG004	NovaSeq	70	TRUE	GT	GATK4	AllTandemRepeatsandHomopolymers	AAAAAa	FP	11187	0.191493
HG002+HG003+HG004	NovaSeq	70	TRUE	GT	FreeBayes	AllTandemRepeatsandHomopolymers	aaaaaa	FN	7384	0.0827339	0.00903677
HG002+HG003+HG004	NovaSeq	70	TRUE	GT	FreeBayes	AllTandemRepeatsandHomopolymers	aaaaaa	FP	437	0.00702923
HG002+HG003+HG004	NovaSeq	70	TRUE	GT	FreeBayes	AllTandemRepeatsandHomopolymers	Aaaaaa	FN	5954	0.0667115	0.0145181
HG002+HG003+HG004	NovaSeq	70	TRUE	GT	FreeBayes	AllTandemRepeatsandHomopolymers	Aaaaaa	FP	4011	0.0645177
HG002+HG003+HG004	NovaSeq	70	TRUE	GT	FreeBayes	AllTandemRepeatsandHomopolymers	AAaaaa	FN	12947	0.145064	0.0217358
HG002+HG003+HG004	NovaSeq	70	TRUE	GT	FreeBayes	AllTandemRepeatsandHomopolymers	AAaaaa	FP	10135	0.163023
HG002+HG003+HG004	NovaSeq	70	TRUE	GT	FreeBayes	AllTandemRepeatsandHomopolymers	AAAaaa	FN	19338	0.216672	0.0250771
HG002+HG003+HG004	NovaSeq	70	TRUE	GT	FreeBayes	AllTandemRepeatsandHomopolymers	AAAaaa	FP	16949	0.272628
HG002+HG003+HG004	NovaSeq	70	TRUE	GT	FreeBayes	AllTandemRepeatsandHomopolymers	AAAAaa	FN	27365	0.306611	0.0220953
HG002+HG003+HG004	NovaSeq	70	TRUE	GT	FreeBayes	AllTandemRepeatsandHomopolymers	AAAAaa	FP	16652	0.267851
HG002+HG003+HG004	NovaSeq	70	TRUE	GT	FreeBayes	AllTandemRepeatsandHomopolymers	AAAAAa	FN	16262	0.182207	0.0152654
HG002+HG003+HG004	NovaSeq	70	TRUE	GT	FreeBayes	AllTandemRepeatsandHomopolymers	AAAAAa	FP	13985	0.224951
HG002+HG003+HG004	NovaSeq	70	TRUE	GT	Octopus	notinAllTandemRepeatsandHomopolymers	aaaaaa	FN	7055	0.0248659	0.00863413
HG002+HG003+HG004	NovaSeq	70	TRUE	GT	Octopus	notinAllTandemRepeatsandHomopolymers	aaaaaa	FP	165	0.000585115
HG002+HG003+HG004	NovaSeq	70	TRUE	GT	Octopus	notinAllTandemRepeatsandHomopolymers	Aaaaaa	FN	15931	0.05615	0.0388457
HG002+HG003+HG004	NovaSeq	70	TRUE	GT	Octopus	notinAllTandemRepeatsandHomopolymers	Aaaaaa	FP	19084	0.0676747
HG002+HG003+HG004	NovaSeq	70	TRUE	GT	Octopus	notinAllTandemRepeatsandHomopolymers	AAaaaa	FN	47671	0.16802	0.0800314
HG002+HG003+HG004	NovaSeq	70	TRUE	GT	Octopus	notinAllTandemRepeatsandHomopolymers	AAaaaa	FP	43351	0.153729
HG002+HG003+HG004	NovaSeq	70	TRUE	GT	Octopus	notinAllTandemRepeatsandHomopolymers	AAAaaa	FN	72572	0.255786	0.0941097
HG002+HG003+HG004	NovaSeq	70	TRUE	GT	Octopus	notinAllTandemRepeatsandHomopolymers	AAAaaa	FP	79244	0.281011
HG002+HG003+HG004	NovaSeq	70	TRUE	GT	Octopus	notinAllTandemRepeatsandHomopolymers	AAAAaa	FN	100935	0.355753	0.0814979
HG002+HG003+HG004	NovaSeq	70	TRUE	GT	Octopus	notinAllTandemRepeatsandHomopolymers	AAAAaa	FP	72695	0.257787
HG002+HG003+HG004	NovaSeq	70	TRUE	GT	Octopus	notinAllTandemRepeatsandHomopolymers	AAAAAa	FN	39558	0.139425	0.0371337
HG002+HG003+HG004	NovaSeq	70	TRUE	GT	Octopus	notinAllTandemRepeatsandHomopolymers	AAAAAa	FP	67457	0.239213
HG002+HG003+HG004	NovaSeq	70	TRUE	GT	GATK4	notinAllTandemRepeatsandHomopolymers	aaaaaa	FN	18695	0.0335167	0.0228795
HG002+HG003+HG004	NovaSeq	70	TRUE	GT	GATK4	notinAllTandemRepeatsandHomopolymers	aaaaaa	FP	131	0.000281015
HG002+HG003+HG004	NovaSeq	70	TRUE	GT	GATK4	notinAllTandemRepeatsandHomopolymers	Aaaaaa	FN	29993	0.0537719	0.073134
HG002+HG003+HG004	NovaSeq	70	TRUE	GT	GATK4	notinAllTandemRepeatsandHomopolymers	Aaaaaa	FP	33205	0.0712297
HG002+HG003+HG004	NovaSeq	70	TRUE	GT	GATK4	notinAllTandemRepeatsandHomopolymers	AAaaaa	FN	90110	0.161551	0.151279
HG002+HG003+HG004	NovaSeq	70	TRUE	GT	GATK4	notinAllTandemRepeatsandHomopolymers	AAaaaa	FP	78646	0.168707
HG002+HG003+HG004	NovaSeq	70	TRUE	GT	GATK4	notinAllTandemRepeatsandHomopolymers	AAAaaa	FN	133342	0.239058	0.172915
HG002+HG003+HG004	NovaSeq	70	TRUE	GT	GATK4	notinAllTandemRepeatsandHomopolymers	AAAaaa	FP	137599	0.29517
HG002+HG003+HG004	NovaSeq	70	TRUE	GT	GATK4	notinAllTandemRepeatsandHomopolymers	AAAAaa	FN	177727	0.318632	0.143502
HG002+HG003+HG004	NovaSeq	70	TRUE	GT	GATK4	notinAllTandemRepeatsandHomopolymers	AAAAaa	FP	120734	0.258992
HG002+HG003+HG004	NovaSeq	70	TRUE	GT	GATK4	notinAllTandemRepeatsandHomopolymers	AAAAAa	FN	107915	0.193472	0.101301
HG002+HG003+HG004	NovaSeq	70	TRUE	GT	GATK4	notinAllTandemRepeatsandHomopolymers	AAAAAa	FP	95853	0.205619
HG002+HG003+HG004	NovaSeq	70	TRUE	GT	FreeBayes	notinAllTandemRepeatsandHomopolymers	aaaaaa	FN	14515	0.0268515	0.0177639
HG002+HG003+HG004	NovaSeq	70	TRUE	GT	FreeBayes	notinAllTandemRepeatsandHomopolymers	aaaaaa	FP	412	0.000800154
HG002+HG003+HG004	NovaSeq	70	TRUE	GT	FreeBayes	notinAllTandemRepeatsandHomopolymers	Aaaaaa	FN	34846	0.0644621	0.0849674
HG002+HG003+HG004	NovaSeq	70	TRUE	GT	FreeBayes	notinAllTandemRepeatsandHomopolymers	Aaaaaa	FP	33480	0.0650222
HG002+HG003+HG004	NovaSeq	70	TRUE	GT	FreeBayes	notinAllTandemRepeatsandHomopolymers	AAaaaa	FN	93200	0.172412	0.156467
HG002+HG003+HG004	NovaSeq	70	TRUE	GT	FreeBayes	notinAllTandemRepeatsandHomopolymers	AAaaaa	FP	86563	0.168116
HG002+HG003+HG004	NovaSeq	70	TRUE	GT	FreeBayes	notinAllTandemRepeatsandHomopolymers	AAAaaa	FN	137436	0.254245	0.178224
HG002+HG003+HG004	NovaSeq	70	TRUE	GT	FreeBayes	notinAllTandemRepeatsandHomopolymers	AAAaaa	FP	150496	0.292281
HG002+HG003+HG004	NovaSeq	70	TRUE	GT	FreeBayes	notinAllTandemRepeatsandHomopolymers	AAAAaa	FN	182643	0.337874	0.147471
HG002+HG003+HG004	NovaSeq	70	TRUE	GT	FreeBayes	notinAllTandemRepeatsandHomopolymers	AAAAaa	FP	137363	0.266776
HG002+HG003+HG004	NovaSeq	70	TRUE	GT	FreeBayes	notinAllTandemRepeatsandHomopolymers	AAAAAa	FN	77926	0.144156	0.0731502
HG002+HG003+HG004	NovaSeq	70	TRUE	GT	FreeBayes	notinAllTandemRepeatsandHomopolymers	AAAAAa	FP	106587	0.207005
HG002+HG003+HG004	NovaSeq	80	TRUE	GT	Octopus	genome	aaaaaa	FN	7134	0.0266772	0.00873081
HG002+HG003+HG004	NovaSeq	80	TRUE	GT	Octopus	genome	aaaaaa	FP	515	0.00189041
HG002+HG003+HG004	NovaSeq	80	TRUE	GT	Octopus	genome	Aaaaaa	FN	15286	0.0571612	0.0372729
HG002+HG003+HG004	NovaSeq	80	TRUE	GT	Octopus	genome	Aaaaaa	FP	17587	0.0645565
HG002+HG003+HG004	NovaSeq	80	TRUE	GT	Octopus	genome	AAaaaa	FN	44450	0.166219	0.0746239
HG002+HG003+HG004	NovaSeq	80	TRUE	GT	Octopus	genome	AAaaaa	FP	41142	0.15102
HG002+HG003+HG004	NovaSeq	80	TRUE	GT	Octopus	genome	AAAaaa	FN	68797	0.257263	0.0892143
HG002+HG003+HG004	NovaSeq	80	TRUE	GT	Octopus	genome	AAAaaa	FP	74462	0.273327
HG002+HG003+HG004	NovaSeq	80	TRUE	GT	Octopus	genome	AAAAaa	FN	94408	0.353034	0.0762278
HG002+HG003+HG004	NovaSeq	80	TRUE	GT	Octopus	genome	AAAAaa	FP	69477	0.255029
HG002+HG003+HG004	NovaSeq	80	TRUE	GT	Octopus	genome	AAAAAa	FN	37344	0.139646	0.0350553
HG002+HG003+HG004	NovaSeq	80	TRUE	GT	Octopus	genome	AAAAAa	FP	69245	0.254177
HG002+HG003+HG004	NovaSeq	80	TRUE	GT	GATK4	genome	aaaaaa	FN	20098	0.0367477	0.0245966
HG002+HG003+HG004	NovaSeq	80	TRUE	GT	GATK4	genome	aaaaaa	FP	195	0.000434281
HG002+HG003+HG004	NovaSeq	80	TRUE	GT	GATK4	genome	Aaaaaa	FN	28639	0.0523642	0.0698325
HG002+HG003+HG004	NovaSeq	80	TRUE	GT	GATK4	genome	Aaaaaa	FP	31722	0.0706475
HG002+HG003+HG004	NovaSeq	80	TRUE	GT	GATK4	genome	AAaaaa	FN	86870	0.158835	0.14584
HG002+HG003+HG004	NovaSeq	80	TRUE	GT	GATK4	genome	AAaaaa	FP	75411	0.167946
HG002+HG003+HG004	NovaSeq	80	TRUE	GT	GATK4	genome	AAAaaa	FN	130535	0.238673	0.169275
HG002+HG003+HG004	NovaSeq	80	TRUE	GT	GATK4	genome	AAAaaa	FP	132926	0.296037
HG002+HG003+HG004	NovaSeq	80	TRUE	GT	GATK4	genome	AAAAaa	FN	171073	0.312794	0.138129
HG002+HG003+HG004	NovaSeq	80	TRUE	GT	GATK4	genome	AAAAaa	FP	116304	0.259019
HG002+HG003+HG004	NovaSeq	80	TRUE	GT	GATK4	genome	AAAAAa	FN	109704	0.200585	0.102981
HG002+HG003+HG004	NovaSeq	80	TRUE	GT	GATK4	genome	AAAAAa	FP	92460	0.205916
HG002+HG003+HG004	NovaSeq	80	TRUE	GT	FreeBayes	genome	aaaaaa	FN	20554	0.0375357	0.0251546
HG002+HG003+HG004	NovaSeq	80	TRUE	GT	FreeBayes	genome	aaaaaa	FP	541	0.00108279
HG002+HG003+HG004	NovaSeq	80	TRUE	GT	FreeBayes	genome	Aaaaaa	FN	35593	0.0649998	0.0867889
HG002+HG003+HG004	NovaSeq	80	TRUE	GT	FreeBayes	genome	Aaaaaa	FP	31035	0.0621156
HG002+HG003+HG004	NovaSeq	80	TRUE	GT	FreeBayes	genome	AAaaaa	FN	92874	0.169606	0.155919
HG002+HG003+HG004	NovaSeq	80	TRUE	GT	FreeBayes	genome	AAaaaa	FP	83181	0.166484
HG002+HG003+HG004	NovaSeq	80	TRUE	GT	FreeBayes	genome	AAAaaa	FN	138869	0.253602	0.180082
HG002+HG003+HG004	NovaSeq	80	TRUE	GT	FreeBayes	genome	AAAaaa	FP	144782	0.289777
HG002+HG003+HG004	NovaSeq	80	TRUE	GT	FreeBayes	genome	AAAAaa	FN	182025	0.332414	0.146972
HG002+HG003+HG004	NovaSeq	80	TRUE	GT	FreeBayes	genome	AAAAaa	FP	133492	0.26718
HG002+HG003+HG004	NovaSeq	80	TRUE	GT	FreeBayes	genome	AAAAAa	FN	77671	0.141843	0.0729109
HG002+HG003+HG004	NovaSeq	80	TRUE	GT	FreeBayes	genome	AAAAAa	FP	106602	0.213361
HG002+HG003+HG004	NovaSeq	80	TRUE	GT	Octopus	alldifficult	aaaaaa	FN	5237	0.0512306	0.00640921
HG002+HG003+HG004	NovaSeq	80	TRUE	GT	Octopus	alldifficult	aaaaaa	FP	487	0.00465032
HG002+HG003+HG004	NovaSeq	80	TRUE	GT	Octopus	alldifficult	Aaaaaa	FN	7638	0.0747183	0.0186243
HG002+HG003+HG004	NovaSeq	80	TRUE	GT	Octopus	alldifficult	Aaaaaa	FP	5355	0.0511344
HG002+HG003+HG004	NovaSeq	80	TRUE	GT	Octopus	alldifficult	AAaaaa	FN	16685	0.16322	0.0280112
HG002+HG003+HG004	NovaSeq	80	TRUE	GT	Octopus	alldifficult	AAaaaa	FP	12315	0.117595
HG002+HG003+HG004	NovaSeq	80	TRUE	GT	Octopus	alldifficult	AAAaaa	FN	23972	0.234505	0.0310863
HG002+HG003+HG004	NovaSeq	80	TRUE	GT	Octopus	alldifficult	AAAaaa	FP	22504	0.214889
HG002+HG003+HG004	NovaSeq	80	TRUE	GT	Octopus	alldifficult	AAAAaa	FN	31780	0.310886	0.0256601
HG002+HG003+HG004	NovaSeq	80	TRUE	GT	Octopus	alldifficult	AAAAaa	FP	26677	0.254736
HG002+HG003+HG004	NovaSeq	80	TRUE	GT	Octopus	alldifficult	AAAAAa	FN	16912	0.165441	0.0158755
HG002+HG003+HG004	NovaSeq	80	TRUE	GT	Octopus	alldifficult	AAAAAa	FP	37386	0.356996
HG002+HG003+HG004	NovaSeq	80	TRUE	GT	GATK4	alldifficult	aaaaaa	FN	17497	0.0894411	0.0214134
HG002+HG003+HG004	NovaSeq	80	TRUE	GT	GATK4	alldifficult	aaaaaa	FP	165	0.00129108
HG002+HG003+HG004	NovaSeq	80	TRUE	GT	GATK4	alldifficult	Aaaaaa	FN	12542	0.0641121	0.030582
HG002+HG003+HG004	NovaSeq	80	TRUE	GT	GATK4	alldifficult	Aaaaaa	FP	7768	0.0607825
HG002+HG003+HG004	NovaSeq	80	TRUE	GT	GATK4	alldifficult	AAaaaa	FN	27477	0.140457	0.0461291
HG002+HG003+HG004	NovaSeq	80	TRUE	GT	GATK4	alldifficult	AAaaaa	FP	18392	0.143912
HG002+HG003+HG004	NovaSeq	80	TRUE	GT	GATK4	alldifficult	AAAaaa	FN	39610	0.202478	0.0513653
HG002+HG003+HG004	NovaSeq	80	TRUE	GT	GATK4	alldifficult	AAAaaa	FP	32601	0.255094
HG002+HG003+HG004	NovaSeq	80	TRUE	GT	GATK4	alldifficult	AAAAaa	FN	52953	0.270685	0.0427558
HG002+HG003+HG004	NovaSeq	80	TRUE	GT	GATK4	alldifficult	AAAAaa	FP	33201	0.259789
HG002+HG003+HG004	NovaSeq	80	TRUE	GT	GATK4	alldifficult	AAAAAa	FN	45547	0.232827	0.0427556
HG002+HG003+HG004	NovaSeq	80	TRUE	GT	GATK4	alldifficult	AAAAAa	FP	35673	0.279131
HG002+HG003+HG004	NovaSeq	80	TRUE	GT	FreeBayes	alldifficult	aaaaaa	FN	13625	0.0737327	0.0166747
HG002+HG003+HG004	NovaSeq	80	TRUE	GT	FreeBayes	alldifficult	aaaaaa	FP	439	0.00296756
HG002+HG003+HG004	NovaSeq	80	TRUE	GT	FreeBayes	alldifficult	Aaaaaa	FN	14608	0.0790523	0.0356197
HG002+HG003+HG004	NovaSeq	80	TRUE	GT	FreeBayes	alldifficult	Aaaaaa	FP	6981	0.0471903
HG002+HG003+HG004	NovaSeq	80	TRUE	GT	FreeBayes	alldifficult	AAaaaa	FN	29103	0.157493	0.0488589
HG002+HG003+HG004	NovaSeq	80	TRUE	GT	FreeBayes	alldifficult	AAaaaa	FP	20728	0.140117
HG002+HG003+HG004	NovaSeq	80	TRUE	GT	FreeBayes	alldifficult	AAAaaa	FN	41621	0.225235	0.0539731
HG002+HG003+HG004	NovaSeq	80	TRUE	GT	FreeBayes	alldifficult	AAAaaa	FP	36068	0.243813
HG002+HG003+HG004	NovaSeq	80	TRUE	GT	FreeBayes	alldifficult	AAAAaa	FN	54967	0.297458	0.044382
HG002+HG003+HG004	NovaSeq	80	TRUE	GT	FreeBayes	alldifficult	AAAAaa	FP	40308	0.272475
HG002+HG003+HG004	NovaSeq	80	TRUE	GT	FreeBayes	alldifficult	AAAAAa	FN	30865	0.167028	0.0289734
HG002+HG003+HG004	NovaSeq	80	TRUE	GT	FreeBayes	alldifficult	AAAAAa	FP	43409	0.293437
HG002+HG003+HG004	NovaSeq	80	TRUE	GT	Octopus	alllowmapandsegdup	aaaaaa	FN	4298	0.0757878	0.00526003
HG002+HG003+HG004	NovaSeq	80	TRUE	GT	Octopus	alllowmapandsegdup	aaaaaa	FP	73	0.00130032
HG002+HG003+HG004	NovaSeq	80	TRUE	GT	Octopus	alllowmapandsegdup	Aaaaaa	FN	5451	0.0961189	0.0132916
HG002+HG003+HG004	NovaSeq	80	TRUE	GT	Octopus	alllowmapandsegdup	Aaaaaa	FP	1869	0.0332918
HG002+HG003+HG004	NovaSeq	80	TRUE	GT	Octopus	alllowmapandsegdup	AAaaaa	FN	9124	0.160886	0.0153176
HG002+HG003+HG004	NovaSeq	80	TRUE	GT	Octopus	alllowmapandsegdup	AAaaaa	FP	4551	0.0810652
HG002+HG003+HG004	NovaSeq	80	TRUE	GT	Octopus	alllowmapandsegdup	AAAaaa	FN	12346	0.2177	0.01601
HG002+HG003+HG004	NovaSeq	80	TRUE	GT	Octopus	alllowmapandsegdup	AAAaaa	FP	8929	0.159049
HG002+HG003+HG004	NovaSeq	80	TRUE	GT	Octopus	alllowmapandsegdup	AAAAaa	FN	15694	0.276736	0.0126718
HG002+HG003+HG004	NovaSeq	80	TRUE	GT	Octopus	alllowmapandsegdup	AAAAaa	FP	14217	0.253242
HG002+HG003+HG004	NovaSeq	80	TRUE	GT	Octopus	alllowmapandsegdup	AAAAAa	FN	9798	0.172771	0.00919752
HG002+HG003+HG004	NovaSeq	80	TRUE	GT	Octopus	alllowmapandsegdup	AAAAAa	FP	26501	0.472052
HG002+HG003+HG004	NovaSeq	80	TRUE	GT	GATK4	alllowmapandsegdup	aaaaaa	FN	15664	0.152879	0.0191701
HG002+HG003+HG004	NovaSeq	80	TRUE	GT	GATK4	alllowmapandsegdup	aaaaaa	FP	27	0.000513503
HG002+HG003+HG004	NovaSeq	80	TRUE	GT	GATK4	alllowmapandsegdup	Aaaaaa	FN	8386	0.0818466	0.0204482
HG002+HG003+HG004	NovaSeq	80	TRUE	GT	GATK4	alllowmapandsegdup	Aaaaaa	FP	2092	0.039787
HG002+HG003+HG004	NovaSeq	80	TRUE	GT	GATK4	alllowmapandsegdup	AAaaaa	FN	13721	0.133916	0.0230352
HG002+HG003+HG004	NovaSeq	80	TRUE	GT	GATK4	alllowmapandsegdup	AAaaaa	FP	5659	0.107626
HG002+HG003+HG004	NovaSeq	80	TRUE	GT	GATK4	alllowmapandsegdup	AAAaaa	FN	18994	0.18538	0.024631
HG002+HG003+HG004	NovaSeq	80	TRUE	GT	GATK4	alllowmapandsegdup	AAAaaa	FP	10693	0.203366
HG002+HG003+HG004	NovaSeq	80	TRUE	GT	GATK4	alllowmapandsegdup	AAAAaa	FN	25371	0.247619	0.0204853
HG002+HG003+HG004	NovaSeq	80	TRUE	GT	GATK4	alllowmapandsegdup	AAAAaa	FP	13762	0.261734
HG002+HG003+HG004	NovaSeq	80	TRUE	GT	GATK4	alllowmapandsegdup	AAAAAa	FN	20324	0.19836	0.0190784
HG002+HG003+HG004	NovaSeq	80	TRUE	GT	GATK4	alllowmapandsegdup	AAAAAa	FP	20347	0.386972
HG002+HG003+HG004	NovaSeq	80	TRUE	GT	FreeBayes	alllowmapandsegdup	aaaaaa	FN	5795	0.0739224	0.0070921
HG002+HG003+HG004	NovaSeq	80	TRUE	GT	FreeBayes	alllowmapandsegdup	aaaaaa	FP	114	0.00172362
HG002+HG003+HG004	NovaSeq	80	TRUE	GT	FreeBayes	alllowmapandsegdup	Aaaaaa	FN	7513	0.0958376	0.0183195
HG002+HG003+HG004	NovaSeq	80	TRUE	GT	FreeBayes	alllowmapandsegdup	Aaaaaa	FP	1788	0.0270336
HG002+HG003+HG004	NovaSeq	80	TRUE	GT	FreeBayes	alllowmapandsegdup	AAaaaa	FN	12496	0.159402	0.0209786
HG002+HG003+HG004	NovaSeq	80	TRUE	GT	FreeBayes	alllowmapandsegdup	AAaaaa	FP	7423	0.112232
HG002+HG003+HG004	NovaSeq	80	TRUE	GT	FreeBayes	alllowmapandsegdup	AAAaaa	FN	17197	0.219369	0.0223007
HG002+HG003+HG004	NovaSeq	80	TRUE	GT	FreeBayes	alllowmapandsegdup	AAAaaa	FP	13365	0.202071
HG002+HG003+HG004	NovaSeq	80	TRUE	GT	FreeBayes	alllowmapandsegdup	AAAAaa	FN	21379	0.272716	0.017262
HG002+HG003+HG004	NovaSeq	80	TRUE	GT	FreeBayes	alllowmapandsegdup	AAAAaa	FP	18802	0.284276
HG002+HG003+HG004	NovaSeq	80	TRUE	GT	FreeBayes	alllowmapandsegdup	AAAAAa	FN	14013	0.178753	0.0131542
HG002+HG003+HG004	NovaSeq	80	TRUE	GT	FreeBayes	alllowmapandsegdup	AAAAAa	FP	24648	0.372664
HG002+HG003+HG004	NovaSeq	80	TRUE	GT	Octopus	notinalldifficult	aaaaaa	FN	1898	0.0114879	0.00232283
HG002+HG003+HG004	NovaSeq	80	TRUE	GT	Octopus	notinalldifficult	aaaaaa	FP	29	0.000172888
HG002+HG003+HG004	NovaSeq	80	TRUE	GT	Octopus	notinalldifficult	Aaaaaa	FN	7650	0.0463027	0.0186535
HG002+HG003+HG004	NovaSeq	80	TRUE	GT	Octopus	notinalldifficult	Aaaaaa	FP	12227	0.072893
HG002+HG003+HG004	NovaSeq	80	TRUE	GT	Octopus	notinalldifficult	AAaaaa	FN	27761	0.168028	0.0466059
HG002+HG003+HG004	NovaSeq	80	TRUE	GT	Octopus	notinalldifficult	AAaaaa	FP	28825	0.171844
HG002+HG003+HG004	NovaSeq	80	TRUE	GT	Octopus	notinalldifficult	AAAaaa	FN	44837	0.271382	0.0581436
HG002+HG003+HG004	NovaSeq	80	TRUE	GT	Octopus	notinalldifficult	AAAaaa	FP	51954	0.309731
HG002+HG003+HG004	NovaSeq	80	TRUE	GT	Octopus	notinalldifficult	AAAAaa	FN	62634	0.379101	0.0505725
HG002+HG003+HG004	NovaSeq	80	TRUE	GT	Octopus	notinalldifficult	AAAAaa	FP	42811	0.255224
HG002+HG003+HG004	NovaSeq	80	TRUE	GT	Octopus	notinalldifficult	AAAAAa	FN	20437	0.123698	0.0191845
HG002+HG003+HG004	NovaSeq	80	TRUE	GT	Octopus	notinalldifficult	AAAAAa	FP	31893	0.190135
HG002+HG003+HG004	NovaSeq	80	TRUE	GT	GATK4	notinalldifficult	aaaaaa	FN	2598	0.00739453	0.00317951
HG002+HG003+HG004	NovaSeq	80	TRUE	GT	GATK4	notinalldifficult	aaaaaa	FP	30	9.33826e-05
HG002+HG003+HG004	NovaSeq	80	TRUE	GT	GATK4	notinalldifficult	Aaaaaa	FN	16096	0.045813	0.039248
HG002+HG003+HG004	NovaSeq	80	TRUE	GT	GATK4	notinalldifficult	Aaaaaa	FP	23948	0.0745442
HG002+HG003+HG004	NovaSeq	80	TRUE	GT	GATK4	notinalldifficult	AAaaaa	FN	59384	0.169021	0.0996955
HG002+HG003+HG004	NovaSeq	80	TRUE	GT	GATK4	notinalldifficult	AAaaaa	FP	57018	0.177483
HG002+HG003+HG004	NovaSeq	80	TRUE	GT	GATK4	notinalldifficult	AAAaaa	FN	90944	0.258848	0.117934
HG002+HG003+HG004	NovaSeq	80	TRUE	GT	GATK4	notinalldifficult	AAAaaa	FP	100332	0.312309
HG002+HG003+HG004	NovaSeq	80	TRUE	GT	GATK4	notinalldifficult	AAAAaa	FN	118145	0.336269	0.0953938
HG002+HG003+HG004	NovaSeq	80	TRUE	GT	GATK4	notinalldifficult	AAAAaa	FP	83130	0.258763
HG002+HG003+HG004	NovaSeq	80	TRUE	GT	GATK4	notinalldifficult	AAAAAa	FN	64174	0.182654	0.060241
HG002+HG003+HG004	NovaSeq	80	TRUE	GT	GATK4	notinalldifficult	AAAAAa	FP	56801	0.176807
HG002+HG003+HG004	NovaSeq	80	TRUE	GT	FreeBayes	notinalldifficult	aaaaaa	FN	6896	0.0190054	0.00843954
HG002+HG003+HG004	NovaSeq	80	TRUE	GT	FreeBayes	notinalldifficult	aaaaaa	FP	185	0.000516744
HG002+HG003+HG004	NovaSeq	80	TRUE	GT	FreeBayes	notinalldifficult	Aaaaaa	FN	20981	0.0578236	0.0511594
HG002+HG003+HG004	NovaSeq	80	TRUE	GT	FreeBayes	notinalldifficult	Aaaaaa	FP	24433	0.0682465
HG002+HG003+HG004	NovaSeq	80	TRUE	GT	FreeBayes	notinalldifficult	AAaaaa	FN	63766	0.175739	0.107052
HG002+HG003+HG004	NovaSeq	80	TRUE	GT	FreeBayes	notinalldifficult	AAaaaa	FP	63422	0.177151
HG002+HG003+HG004	NovaSeq	80	TRUE	GT	FreeBayes	notinalldifficult	AAAaaa	FN	97267	0.268068	0.126134
HG002+HG003+HG004	NovaSeq	80	TRUE	GT	FreeBayes	notinalldifficult	AAAaaa	FP	110435	0.308468
HG002+HG003+HG004	NovaSeq	80	TRUE	GT	FreeBayes	notinalldifficult	AAAAaa	FN	127093	0.350268	0.102619
HG002+HG003+HG004	NovaSeq	80	TRUE	GT	FreeBayes	notinalldifficult	AAAAaa	FP	95006	0.265372
HG002+HG003+HG004	NovaSeq	80	TRUE	GT	FreeBayes	notinalldifficult	AAAAAa	FN	46842	0.129096	0.0439712
HG002+HG003+HG004	NovaSeq	80	TRUE	GT	FreeBayes	notinalldifficult	AAAAAa	FP	64530	0.180246
HG002+HG003+HG004	NovaSeq	80	TRUE	GT	Octopus	notinalllowmapandsegdup	aaaaaa	FN	2836	0.0134603	0.00347079
HG002+HG003+HG004	NovaSeq	80	TRUE	GT	Octopus	notinalllowmapandsegdup	aaaaaa	FP	442	0.00204352
HG002+HG003+HG004	NovaSeq	80	TRUE	GT	Octopus	notinalllowmapandsegdup	Aaaaaa	FN	9835	0.0466791	0.0239814
HG002+HG003+HG004	NovaSeq	80	TRUE	GT	Octopus	notinalllowmapandsegdup	Aaaaaa	FP	15717	0.0726653
HG002+HG003+HG004	NovaSeq	80	TRUE	GT	Octopus	notinalllowmapandsegdup	AAaaaa	FN	35321	0.167641	0.0592978
HG002+HG003+HG004	NovaSeq	80	TRUE	GT	Octopus	notinalllowmapandsegdup	AAaaaa	FP	36588	0.169159
HG002+HG003+HG004	NovaSeq	80	TRUE	GT	Octopus	notinalllowmapandsegdup	AAAaaa	FN	56448	0.267915	0.0732004
HG002+HG003+HG004	NovaSeq	80	TRUE	GT	Octopus	notinalllowmapandsegdup	AAAaaa	FP	65524	0.302941
HG002+HG003+HG004	NovaSeq	80	TRUE	GT	Octopus	notinalllowmapandsegdup	AAAAaa	FN	78709	0.37357	0.063552
HG002+HG003+HG004	NovaSeq	80	TRUE	GT	Octopus	notinalllowmapandsegdup	AAAAaa	FP	55257	0.255473
HG002+HG003+HG004	NovaSeq	80	TRUE	GT	Octopus	notinalllowmapandsegdup	AAAAAa	FN	27545	0.130735	0.0258569
HG002+HG003+HG004	NovaSeq	80	TRUE	GT	Octopus	notinalllowmapandsegdup	AAAAAa	FP	42765	0.197718
HG002+HG003+HG004	NovaSeq	80	TRUE	GT	GATK4	notinalllowmapandsegdup	aaaaaa	FN	4430	0.00996796	0.00542157
HG002+HG003+HG004	NovaSeq	80	TRUE	GT	GATK4	notinalllowmapandsegdup	aaaaaa	FP	168	0.00042381
HG002+HG003+HG004	NovaSeq	80	TRUE	GT	GATK4	notinalllowmapandsegdup	Aaaaaa	FN	20248	0.0455601	0.0493721
HG002+HG003+HG004	NovaSeq	80	TRUE	GT	GATK4	notinalllowmapandsegdup	Aaaaaa	FP	29628	0.0747419
HG002+HG003+HG004	NovaSeq	80	TRUE	GT	GATK4	notinalllowmapandsegdup	AAaaaa	FN	73140	0.164573	0.122789
HG002+HG003+HG004	NovaSeq	80	TRUE	GT	GATK4	notinalllowmapandsegdup	AAaaaa	FP	69740	0.175932
HG002+HG003+HG004	NovaSeq	80	TRUE	GT	GATK4	notinalllowmapandsegdup	AAAaaa	FN	111532	0.250959	0.144632
HG002+HG003+HG004	NovaSeq	80	TRUE	GT	GATK4	notinalllowmapandsegdup	AAAaaa	FP	122222	0.308327
HG002+HG003+HG004	NovaSeq	80	TRUE	GT	GATK4	notinalllowmapandsegdup	AAAAaa	FN	145697	0.327833	0.11764
HG002+HG003+HG004	NovaSeq	80	TRUE	GT	GATK4	notinalllowmapandsegdup	AAAAaa	FP	102535	0.258663
HG002+HG003+HG004	NovaSeq	80	TRUE	GT	GATK4	notinalllowmapandsegdup	AAAAAa	FN	89377	0.201108	0.0838995
HG002+HG003+HG004	NovaSeq	80	TRUE	GT	GATK4	notinalllowmapandsegdup	AAAAAa	FP	72111	0.181913
HG002+HG003+HG004	NovaSeq	80	TRUE	GT	FreeBayes	notinalllowmapandsegdup	aaaaaa	FN	14746	0.0314311	0.0180466
HG002+HG003+HG004	NovaSeq	80	TRUE	GT	FreeBayes	notinalllowmapandsegdup	aaaaaa	FP	428	0.000986803
HG002+HG003+HG004	NovaSeq	80	TRUE	GT	FreeBayes	notinalllowmapandsegdup	Aaaaaa	FN	28076	0.059844	0.0684597
HG002+HG003+HG004	NovaSeq	80	TRUE	GT	FreeBayes	notinalllowmapandsegdup	Aaaaaa	FP	29253	0.0674461
HG002+HG003+HG004	NovaSeq	80	TRUE	GT	FreeBayes	notinalllowmapandsegdup	AAaaaa	FN	80368	0.171304	0.134924
HG002+HG003+HG004	NovaSeq	80	TRUE	GT	FreeBayes	notinalllowmapandsegdup	AAaaaa	FP	75795	0.174754
HG002+HG003+HG004	NovaSeq	80	TRUE	GT	FreeBayes	notinalllowmapandsegdup	AAAaaa	FN	121656	0.25931	0.157761
HG002+HG003+HG004	NovaSeq	80	TRUE	GT	FreeBayes	notinalllowmapandsegdup	AAAaaa	FP	131476	0.303133
HG002+HG003+HG004	NovaSeq	80	TRUE	GT	FreeBayes	notinalllowmapandsegdup	AAAAaa	FN	160645	0.342415	0.12971
HG002+HG003+HG004	NovaSeq	80	TRUE	GT	FreeBayes	notinalllowmapandsegdup	AAAAaa	FP	114752	0.264574
HG002+HG003+HG004	NovaSeq	80	TRUE	GT	FreeBayes	notinalllowmapandsegdup	AAAAAa	FN	63662	0.135696	0.0597604
HG002+HG003+HG004	NovaSeq	80	TRUE	GT	FreeBayes	notinalllowmapandsegdup	AAAAAa	FP	82020	0.189106
HG002+HG003+HG004	NovaSeq	80	TRUE	GT	Octopus	AllTandemRepeatsandHomopolymers	aaaaaa	FN	806	0.0244058	0.000986408
HG002+HG003+HG004	NovaSeq	80	TRUE	GT	Octopus	AllTandemRepeatsandHomopolymers	aaaaaa	FP	392	0.0107512
HG002+HG003+HG004	NovaSeq	80	TRUE	GT	Octopus	AllTandemRepeatsandHomopolymers	Aaaaaa	FN	1627	0.0492657	0.00396723
HG002+HG003+HG004	NovaSeq	80	TRUE	GT	Octopus	AllTandemRepeatsandHomopolymers	Aaaaaa	FP	2579	0.0707331
HG002+HG003+HG004	NovaSeq	80	TRUE	GT	Octopus	AllTandemRepeatsandHomopolymers	AAaaaa	FN	5010	0.151703	0.00841092
HG002+HG003+HG004	NovaSeq	80	TRUE	GT	Octopus	AllTandemRepeatsandHomopolymers	AAaaaa	FP	5761	0.158004
HG002+HG003+HG004	NovaSeq	80	TRUE	GT	Octopus	AllTandemRepeatsandHomopolymers	AAAaaa	FN	8406	0.254534	0.0109007
HG002+HG003+HG004	NovaSeq	80	TRUE	GT	Octopus	AllTandemRepeatsandHomopolymers	AAAaaa	FP	9595	0.263158
HG002+HG003+HG004	NovaSeq	80	TRUE	GT	Octopus	AllTandemRepeatsandHomopolymers	AAAAaa	FN	11535	0.349281	0.0093137
HG002+HG003+HG004	NovaSeq	80	TRUE	GT	Octopus	AllTandemRepeatsandHomopolymers	AAAAaa	FP	9395	0.257673
HG002+HG003+HG004	NovaSeq	80	TRUE	GT	Octopus	AllTandemRepeatsandHomopolymers	AAAAAa	FN	5641	0.17081	0.00529529
HG002+HG003+HG004	NovaSeq	80	TRUE	GT	Octopus	AllTandemRepeatsandHomopolymers	AAAAAa	FP	8739	0.239681
HG002+HG003+HG004	NovaSeq	80	TRUE	GT	GATK4	AllTandemRepeatsandHomopolymers	aaaaaa	FN	1675	0.0248819	0.00204992
HG002+HG003+HG004	NovaSeq	80	TRUE	GT	GATK4	AllTandemRepeatsandHomopolymers	aaaaaa	FP	113	0.00223878
HG002+HG003+HG004	NovaSeq	80	TRUE	GT	GATK4	AllTandemRepeatsandHomopolymers	Aaaaaa	FN	2888	0.0429009	0.00704201
HG002+HG003+HG004	NovaSeq	80	TRUE	GT	GATK4	AllTandemRepeatsandHomopolymers	Aaaaaa	FP	4052	0.080279
HG002+HG003+HG004	NovaSeq	80	TRUE	GT	GATK4	AllTandemRepeatsandHomopolymers	AAaaaa	FN	8896	0.132149	0.0149348
HG002+HG003+HG004	NovaSeq	80	TRUE	GT	GATK4	AllTandemRepeatsandHomopolymers	AAaaaa	FP	8720	0.172762
HG002+HG003+HG004	NovaSeq	80	TRUE	GT	GATK4	AllTandemRepeatsandHomopolymers	AAAaaa	FN	14308	0.212543	0.0185543
HG002+HG003+HG004	NovaSeq	80	TRUE	GT	GATK4	AllTandemRepeatsandHomopolymers	AAAaaa	FP	14567	0.288604
HG002+HG003+HG004	NovaSeq	80	TRUE	GT	GATK4	AllTandemRepeatsandHomopolymers	AAAAaa	FN	18919	0.281039	0.0152758
HG002+HG003+HG004	NovaSeq	80	TRUE	GT	GATK4	AllTandemRepeatsandHomopolymers	AAAAaa	FP	13401	0.265503
HG002+HG003+HG004	NovaSeq	80	TRUE	GT	GATK4	AllTandemRepeatsandHomopolymers	AAAAAa	FN	20632	0.306486	0.0193676
HG002+HG003+HG004	NovaSeq	80	TRUE	GT	GATK4	AllTandemRepeatsandHomopolymers	AAAAAa	FP	9621	0.190613
HG002+HG003+HG004	NovaSeq	80	TRUE	GT	FreeBayes	AllTandemRepeatsandHomopolymers	aaaaaa	FN	6935	0.0874395	0.00848727
HG002+HG003+HG004	NovaSeq	80	TRUE	GT	FreeBayes	AllTandemRepeatsandHomopolymers	aaaaaa	FP	313	0.00565421
HG002+HG003+HG004	NovaSeq	80	TRUE	GT	FreeBayes	AllTandemRepeatsandHomopolymers	Aaaaaa	FN	5358	0.067556	0.0130648
HG002+HG003+HG004	NovaSeq	80	TRUE	GT	FreeBayes	AllTandemRepeatsandHomopolymers	Aaaaaa	FP	3432	0.0619976
HG002+HG003+HG004	NovaSeq	80	TRUE	GT	FreeBayes	AllTandemRepeatsandHomopolymers	AAaaaa	FN	11550	0.145627	0.0193905
HG002+HG003+HG004	NovaSeq	80	TRUE	GT	FreeBayes	AllTandemRepeatsandHomopolymers	AAaaaa	FP	8893	0.160648
HG002+HG003+HG004	NovaSeq	80	TRUE	GT	FreeBayes	AllTandemRepeatsandHomopolymers	AAAaaa	FN	17574	0.221581	0.0227895
HG002+HG003+HG004	NovaSeq	80	TRUE	GT	FreeBayes	AllTandemRepeatsandHomopolymers	AAAaaa	FP	14907	0.269288
HG002+HG003+HG004	NovaSeq	80	TRUE	GT	FreeBayes	AllTandemRepeatsandHomopolymers	AAAAaa	FN	24317	0.306599	0.0196343
HG002+HG003+HG004	NovaSeq	80	TRUE	GT	FreeBayes	AllTandemRepeatsandHomopolymers	AAAAaa	FP	14954	0.270137
HG002+HG003+HG004	NovaSeq	80	TRUE	GT	FreeBayes	AllTandemRepeatsandHomopolymers	AAAAAa	FN	13578	0.171197	0.0127459
HG002+HG003+HG004	NovaSeq	80	TRUE	GT	FreeBayes	AllTandemRepeatsandHomopolymers	AAAAAa	FP	12858	0.232274
HG002+HG003+HG004	NovaSeq	80	TRUE	GT	Octopus	notinAllTandemRepeatsandHomopolymers	aaaaaa	FN	6329	0.0269972	0.00774563
HG002+HG003+HG004	NovaSeq	80	TRUE	GT	Octopus	notinAllTandemRepeatsandHomopolymers	aaaaaa	FP	124	0.000525393
HG002+HG003+HG004	NovaSeq	80	TRUE	GT	Octopus	notinAllTandemRepeatsandHomopolymers	Aaaaaa	FN	13662	0.058277	0.033313
HG002+HG003+HG004	NovaSeq	80	TRUE	GT	Octopus	notinAllTandemRepeatsandHomopolymers	Aaaaaa	FP	15005	0.0635767
HG002+HG003+HG004	NovaSeq	80	TRUE	GT	Octopus	notinAllTandemRepeatsandHomopolymers	AAaaaa	FN	39439	0.168232	0.0662113
HG002+HG003+HG004	NovaSeq	80	TRUE	GT	Octopus	notinAllTandemRepeatsandHomopolymers	AAaaaa	FP	35382	0.149915
HG002+HG003+HG004	NovaSeq	80	TRUE	GT	Octopus	notinAllTandemRepeatsandHomopolymers	AAAaaa	FN	60407	0.257674	0.0783344
HG002+HG003+HG004	NovaSeq	80	TRUE	GT	Octopus	notinAllTandemRepeatsandHomopolymers	AAAaaa	FP	64865	0.274835
HG002+HG003+HG004	NovaSeq	80	TRUE	GT	Octopus	notinAllTandemRepeatsandHomopolymers	AAAAaa	FN	82884	0.353552	0.066923
HG002+HG003+HG004	NovaSeq	80	TRUE	GT	Octopus	notinAllTandemRepeatsandHomopolymers	AAAAaa	FP	60097	0.254633
HG002+HG003+HG004	NovaSeq	80	TRUE	GT	Octopus	notinAllTandemRepeatsandHomopolymers	AAAAAa	FN	31711	0.135267	0.0297676
HG002+HG003+HG004	NovaSeq	80	TRUE	GT	Octopus	notinAllTandemRepeatsandHomopolymers	AAAAAa	FP	60541	0.256514
HG002+HG003+HG004	NovaSeq	80	TRUE	GT	GATK4	notinAllTandemRepeatsandHomopolymers	aaaaaa	FN	18423	0.0384062	0.0225466
HG002+HG003+HG004	NovaSeq	80	TRUE	GT	GATK4	notinAllTandemRepeatsandHomopolymers	aaaaaa	FP	82	0.000205711
HG002+HG003+HG004	NovaSeq	80	TRUE	GT	GATK4	notinAllTandemRepeatsandHomopolymers	Aaaaaa	FN	25755	0.0536911	0.0628002
HG002+HG003+HG004	NovaSeq	80	TRUE	GT	GATK4	notinAllTandemRepeatsandHomopolymers	Aaaaaa	FP	27667	0.0694075
HG002+HG003+HG004	NovaSeq	80	TRUE	GT	GATK4	notinAllTandemRepeatsandHomopolymers	AAaaaa	FN	77973	0.162549	0.130903
HG002+HG003+HG004	NovaSeq	80	TRUE	GT	GATK4	notinAllTandemRepeatsandHomopolymers	AAaaaa	FP	66701	0.167331
[truncated: 5,898 more rows]
