# Supplementary material for: Benchmarking small-variant genotyping in polyploids
Source: Genome Res. 2022 Feb;32(2):403–8. doi: 10.1101/gr.275579.121 (PMC8805713; doi:10.1101/gr.275579.121)
Supplement: Supplemental Material [file supp_gr.275579.121_Supplemental_Table_S4.xlsx]

## Sheet: Supplemental Table 4
Supplemental Table S4: Biallelic allele-specific copy number errors in diploid and synthetic polyploid datasets.
Sample	Library	Depth	Filtered	Caller	Stratification	Truth	Call	Total
HG002	NovaSeq	10	FALSE	FreeBayes	AllTandemRepeatsandHomopolymers	Aa	aa	749
HG002	NovaSeq	10	FALSE	FreeBayes	AllTandemRepeatsandHomopolymers	aa	Aa	1119
HG002	NovaSeq	10	FALSE	FreeBayes	alldifficult	Aa	aa	2858
HG002	NovaSeq	10	FALSE	FreeBayes	alldifficult	aa	Aa	4914
HG002	NovaSeq	10	FALSE	FreeBayes	alllowmapandsegdup	Aa	aa	1414
HG002	NovaSeq	10	FALSE	FreeBayes	alllowmapandsegdup	aa	Aa	3259
HG002	NovaSeq	10	FALSE	FreeBayes	genome	Aa	aa	13435
HG002	NovaSeq	10	FALSE	FreeBayes	genome	aa	Aa	15377
HG002	NovaSeq	10	FALSE	FreeBayes	notinAllTandemRepeatsandHomopolymers	Aa	aa	12686
HG002	NovaSeq	10	FALSE	FreeBayes	notinAllTandemRepeatsandHomopolymers	aa	Aa	14258
HG002	NovaSeq	10	FALSE	FreeBayes	notinalldifficult	Aa	aa	10577
HG002	NovaSeq	10	FALSE	FreeBayes	notinalldifficult	aa	Aa	10463
HG002	NovaSeq	10	FALSE	FreeBayes	notinalllowmapandsegdup	Aa	aa	12021
HG002	NovaSeq	10	FALSE	FreeBayes	notinalllowmapandsegdup	aa	Aa	12118
HG002	NovaSeq	10	FALSE	GATK4	AllTandemRepeatsandHomopolymers	Aa	aa	5434
HG002	NovaSeq	10	FALSE	GATK4	AllTandemRepeatsandHomopolymers	aa	Aa	3369
HG002	NovaSeq	10	FALSE	GATK4	alldifficult	Aa	aa	8274
HG002	NovaSeq	10	FALSE	GATK4	alldifficult	aa	Aa	7605
HG002	NovaSeq	10	FALSE	GATK4	alllowmapandsegdup	Aa	aa	1917
HG002	NovaSeq	10	FALSE	GATK4	alllowmapandsegdup	aa	Aa	3451
HG002	NovaSeq	10	FALSE	GATK4	genome	Aa	aa	20979
HG002	NovaSeq	10	FALSE	GATK4	genome	aa	Aa	21885
HG002	NovaSeq	10	FALSE	GATK4	notinAllTandemRepeatsandHomopolymers	Aa	aa	15550
HG002	NovaSeq	10	FALSE	GATK4	notinAllTandemRepeatsandHomopolymers	aa	Aa	18517
HG002	NovaSeq	10	FALSE	GATK4	notinalldifficult	Aa	aa	12708
HG002	NovaSeq	10	FALSE	GATK4	notinalldifficult	aa	Aa	14278
HG002	NovaSeq	10	FALSE	GATK4	notinalllowmapandsegdup	Aa	aa	19060
HG002	NovaSeq	10	FALSE	GATK4	notinalllowmapandsegdup	aa	Aa	18430
HG002	NovaSeq	10	FALSE	Octopus	AllTandemRepeatsandHomopolymers	Aa	aa	5440
HG002	NovaSeq	10	FALSE	Octopus	AllTandemRepeatsandHomopolymers	aa	Aa	1978
HG002	NovaSeq	10	FALSE	Octopus	alldifficult	Aa	aa	8608
HG002	NovaSeq	10	FALSE	Octopus	alldifficult	aa	Aa	5144
HG002	NovaSeq	10	FALSE	Octopus	alllowmapandsegdup	Aa	aa	2253
HG002	NovaSeq	10	FALSE	Octopus	alllowmapandsegdup	aa	Aa	2504
HG002	NovaSeq	10	FALSE	Octopus	genome	Aa	aa	20814
HG002	NovaSeq	10	FALSE	Octopus	genome	aa	Aa	16551
HG002	NovaSeq	10	FALSE	Octopus	notinAllTandemRepeatsandHomopolymers	Aa	aa	15380
HG002	NovaSeq	10	FALSE	Octopus	notinAllTandemRepeatsandHomopolymers	aa	Aa	14577
HG002	NovaSeq	10	FALSE	Octopus	notinalldifficult	Aa	aa	12210
HG002	NovaSeq	10	FALSE	Octopus	notinalldifficult	aa	Aa	11406
HG002	NovaSeq	10	FALSE	Octopus	notinalllowmapandsegdup	Aa	aa	18558
HG002	NovaSeq	10	FALSE	Octopus	notinalllowmapandsegdup	aa	Aa	14043
HG002	NovaSeq	10	TRUE	FreeBayes	AllTandemRepeatsandHomopolymers	Aa	aa	664
HG002	NovaSeq	10	TRUE	FreeBayes	AllTandemRepeatsandHomopolymers	aa	Aa	96
HG002	NovaSeq	10	TRUE	FreeBayes	alldifficult	Aa	aa	2391
HG002	NovaSeq	10	TRUE	FreeBayes	alldifficult	aa	Aa	709
HG002	NovaSeq	10	TRUE	FreeBayes	alllowmapandsegdup	Aa	aa	1089
HG002	NovaSeq	10	TRUE	FreeBayes	alllowmapandsegdup	aa	Aa	587
HG002	NovaSeq	10	TRUE	FreeBayes	genome	Aa	aa	12085
HG002	NovaSeq	10	TRUE	FreeBayes	genome	aa	Aa	1219
HG002	NovaSeq	10	TRUE	FreeBayes	notinAllTandemRepeatsandHomopolymers	Aa	aa	11421
HG002	NovaSeq	10	TRUE	FreeBayes	notinAllTandemRepeatsandHomopolymers	aa	Aa	1123
HG002	NovaSeq	10	TRUE	FreeBayes	notinalldifficult	Aa	aa	9694
HG002	NovaSeq	10	TRUE	FreeBayes	notinalldifficult	aa	Aa	510
HG002	NovaSeq	10	TRUE	FreeBayes	notinalllowmapandsegdup	Aa	aa	10996
HG002	NovaSeq	10	TRUE	FreeBayes	notinalllowmapandsegdup	aa	Aa	632
HG002	NovaSeq	10	TRUE	GATK4	AllTandemRepeatsandHomopolymers	Aa	aa	4730
HG002	NovaSeq	10	TRUE	GATK4	AllTandemRepeatsandHomopolymers	aa	Aa	3138
HG002	NovaSeq	10	TRUE	GATK4	alldifficult	Aa	aa	6892
HG002	NovaSeq	10	TRUE	GATK4	alldifficult	aa	Aa	6085
HG002	NovaSeq	10	TRUE	GATK4	alllowmapandsegdup	Aa	aa	1279
HG002	NovaSeq	10	TRUE	GATK4	alllowmapandsegdup	aa	Aa	2139
HG002	NovaSeq	10	TRUE	GATK4	genome	Aa	aa	19050
HG002	NovaSeq	10	TRUE	GATK4	genome	aa	Aa	20200
HG002	NovaSeq	10	TRUE	GATK4	notinAllTandemRepeatsandHomopolymers	Aa	aa	14326
HG002	NovaSeq	10	TRUE	GATK4	notinAllTandemRepeatsandHomopolymers	aa	Aa	17062
HG002	NovaSeq	10	TRUE	GATK4	notinalldifficult	Aa	aa	12162
HG002	NovaSeq	10	TRUE	GATK4	notinalldifficult	aa	Aa	14113
HG002	NovaSeq	10	TRUE	GATK4	notinalllowmapandsegdup	Aa	aa	17769
HG002	NovaSeq	10	TRUE	GATK4	notinalllowmapandsegdup	aa	Aa	18057
HG002	NovaSeq	10	TRUE	Octopus	AllTandemRepeatsandHomopolymers	Aa	aa	5300
HG002	NovaSeq	10	TRUE	Octopus	AllTandemRepeatsandHomopolymers	aa	Aa	272
HG002	NovaSeq	10	TRUE	Octopus	alldifficult	Aa	aa	8046
HG002	NovaSeq	10	TRUE	Octopus	alldifficult	aa	Aa	1231
HG002	NovaSeq	10	TRUE	Octopus	alllowmapandsegdup	Aa	aa	1837
HG002	NovaSeq	10	TRUE	Octopus	alllowmapandsegdup	aa	Aa	971
HG002	NovaSeq	10	TRUE	Octopus	genome	Aa	aa	20107
HG002	NovaSeq	10	TRUE	Octopus	genome	aa	Aa	1541
HG002	NovaSeq	10	TRUE	Octopus	notinAllTandemRepeatsandHomopolymers	Aa	aa	14813
HG002	NovaSeq	10	TRUE	Octopus	notinAllTandemRepeatsandHomopolymers	aa	Aa	1270
HG002	NovaSeq	10	TRUE	Octopus	notinalldifficult	Aa	aa	12065
HG002	NovaSeq	10	TRUE	Octopus	notinalldifficult	aa	Aa	310
HG002	NovaSeq	10	TRUE	Octopus	notinalllowmapandsegdup	Aa	aa	18267
HG002	NovaSeq	10	TRUE	Octopus	notinalllowmapandsegdup	aa	Aa	570
HG002	NovaSeq	20	FALSE	FreeBayes	AllTandemRepeatsandHomopolymers	Aa	aa	37
HG002	NovaSeq	20	FALSE	FreeBayes	AllTandemRepeatsandHomopolymers	aa	Aa	410
HG002	NovaSeq	20	FALSE	FreeBayes	alldifficult	Aa	aa	436
HG002	NovaSeq	20	FALSE	FreeBayes	alldifficult	aa	Aa	3398
HG002	NovaSeq	20	FALSE	FreeBayes	alllowmapandsegdup	Aa	aa	349
HG002	NovaSeq	20	FALSE	FreeBayes	alllowmapandsegdup	aa	Aa	2896
HG002	NovaSeq	20	FALSE	FreeBayes	genome	Aa	aa	901
HG002	NovaSeq	20	FALSE	FreeBayes	genome	aa	Aa	5801
HG002	NovaSeq	20	FALSE	FreeBayes	notinAllTandemRepeatsandHomopolymers	Aa	aa	864
HG002	NovaSeq	20	FALSE	FreeBayes	notinAllTandemRepeatsandHomopolymers	aa	Aa	5391
HG002	NovaSeq	20	FALSE	FreeBayes	notinalldifficult	Aa	aa	465
HG002	NovaSeq	20	FALSE	FreeBayes	notinalldifficult	aa	Aa	2403
HG002	NovaSeq	20	FALSE	FreeBayes	notinalllowmapandsegdup	Aa	aa	552
HG002	NovaSeq	20	FALSE	FreeBayes	notinalllowmapandsegdup	aa	Aa	2905
HG002	NovaSeq	20	FALSE	GATK4	AllTandemRepeatsandHomopolymers	Aa	aa	624
HG002	NovaSeq	20	FALSE	GATK4	AllTandemRepeatsandHomopolymers	aa	Aa	1628
HG002	NovaSeq	20	FALSE	GATK4	alldifficult	Aa	aa	1110
HG002	NovaSeq	20	FALSE	GATK4	alldifficult	aa	Aa	5023
HG002	NovaSeq	20	FALSE	GATK4	alllowmapandsegdup	Aa	aa	439
HG002	NovaSeq	20	FALSE	GATK4	alllowmapandsegdup	aa	Aa	3228
HG002	NovaSeq	20	FALSE	GATK4	genome	Aa	aa	1517
HG002	NovaSeq	20	FALSE	GATK4	genome	aa	Aa	8589
HG002	NovaSeq	20	FALSE	GATK4	notinAllTandemRepeatsandHomopolymers	Aa	aa	893
HG002	NovaSeq	20	FALSE	GATK4	notinAllTandemRepeatsandHomopolymers	aa	Aa	6960
HG002	NovaSeq	20	FALSE	GATK4	notinalldifficult	Aa	aa	407
HG002	NovaSeq	20	FALSE	GATK4	notinalldifficult	aa	Aa	3564
HG002	NovaSeq	20	FALSE	GATK4	notinalllowmapandsegdup	Aa	aa	1078
HG002	NovaSeq	20	FALSE	GATK4	notinalllowmapandsegdup	aa	Aa	5358
HG002	NovaSeq	20	FALSE	Octopus	AllTandemRepeatsandHomopolymers	Aa	aa	640
HG002	NovaSeq	20	FALSE	Octopus	AllTandemRepeatsandHomopolymers	aa	Aa	635
HG002	NovaSeq	20	FALSE	Octopus	alldifficult	Aa	aa	1325
HG002	NovaSeq	20	FALSE	Octopus	alldifficult	aa	Aa	2961
HG002	NovaSeq	20	FALSE	Octopus	alllowmapandsegdup	Aa	aa	611
HG002	NovaSeq	20	FALSE	Octopus	alllowmapandsegdup	aa	Aa	2167
HG002	NovaSeq	20	FALSE	Octopus	genome	Aa	aa	1629
HG002	NovaSeq	20	FALSE	Octopus	genome	aa	Aa	5832
HG002	NovaSeq	20	FALSE	Octopus	notinAllTandemRepeatsandHomopolymers	Aa	aa	989
HG002	NovaSeq	20	FALSE	Octopus	notinAllTandemRepeatsandHomopolymers	aa	Aa	5200
HG002	NovaSeq	20	FALSE	Octopus	notinalldifficult	Aa	aa	304
HG002	NovaSeq	20	FALSE	Octopus	notinalldifficult	aa	Aa	2874
HG002	NovaSeq	20	FALSE	Octopus	notinalllowmapandsegdup	Aa	aa	1018
HG002	NovaSeq	20	FALSE	Octopus	notinalllowmapandsegdup	aa	Aa	3665
HG002	NovaSeq	20	TRUE	FreeBayes	AllTandemRepeatsandHomopolymers	Aa	aa	33
HG002	NovaSeq	20	TRUE	FreeBayes	AllTandemRepeatsandHomopolymers	aa	Aa	81
HG002	NovaSeq	20	TRUE	FreeBayes	alldifficult	Aa	aa	292
HG002	NovaSeq	20	TRUE	FreeBayes	alldifficult	aa	Aa	787
HG002	NovaSeq	20	TRUE	FreeBayes	alllowmapandsegdup	Aa	aa	206
HG002	NovaSeq	20	TRUE	FreeBayes	alllowmapandsegdup	aa	Aa	720
HG002	NovaSeq	20	TRUE	FreeBayes	genome	Aa	aa	754
HG002	NovaSeq	20	TRUE	FreeBayes	genome	aa	Aa	864
HG002	NovaSeq	20	TRUE	FreeBayes	notinAllTandemRepeatsandHomopolymers	Aa	aa	721
HG002	NovaSeq	20	TRUE	FreeBayes	notinAllTandemRepeatsandHomopolymers	aa	Aa	783
HG002	NovaSeq	20	TRUE	FreeBayes	notinalldifficult	Aa	aa	462
HG002	NovaSeq	20	TRUE	FreeBayes	notinalldifficult	aa	Aa	77
HG002	NovaSeq	20	TRUE	FreeBayes	notinalllowmapandsegdup	Aa	aa	548
HG002	NovaSeq	20	TRUE	FreeBayes	notinalllowmapandsegdup	aa	Aa	144
HG002	NovaSeq	20	TRUE	GATK4	AllTandemRepeatsandHomopolymers	Aa	aa	541
HG002	NovaSeq	20	TRUE	GATK4	AllTandemRepeatsandHomopolymers	aa	Aa	1504
HG002	NovaSeq	20	TRUE	GATK4	alldifficult	Aa	aa	749
HG002	NovaSeq	20	TRUE	GATK4	alldifficult	aa	Aa	3103
HG002	NovaSeq	20	TRUE	GATK4	alllowmapandsegdup	Aa	aa	160
HG002	NovaSeq	20	TRUE	GATK4	alllowmapandsegdup	aa	Aa	1401
HG002	NovaSeq	20	TRUE	GATK4	genome	Aa	aa	1146
HG002	NovaSeq	20	TRUE	GATK4	genome	aa	Aa	6653
HG002	NovaSeq	20	TRUE	GATK4	notinAllTandemRepeatsandHomopolymers	Aa	aa	605
HG002	NovaSeq	20	TRUE	GATK4	notinAllTandemRepeatsandHomopolymers	aa	Aa	5147
HG002	NovaSeq	20	TRUE	GATK4	notinalldifficult	Aa	aa	397
HG002	NovaSeq	20	TRUE	GATK4	notinalldifficult	aa	Aa	3548
HG002	NovaSeq	20	TRUE	GATK4	notinalllowmapandsegdup	Aa	aa	986
HG002	NovaSeq	20	TRUE	GATK4	notinalllowmapandsegdup	aa	Aa	5249
HG002	NovaSeq	20	TRUE	Octopus	AllTandemRepeatsandHomopolymers	Aa	aa	647
HG002	NovaSeq	20	TRUE	Octopus	AllTandemRepeatsandHomopolymers	aa	Aa	89
HG002	NovaSeq	20	TRUE	Octopus	alldifficult	Aa	aa	1123
HG002	NovaSeq	20	TRUE	Octopus	alldifficult	aa	Aa	1151
HG002	NovaSeq	20	TRUE	Octopus	alllowmapandsegdup	Aa	aa	399
HG002	NovaSeq	20	TRUE	Octopus	alllowmapandsegdup	aa	Aa	1083
HG002	NovaSeq	20	TRUE	Octopus	genome	Aa	aa	1423
HG002	NovaSeq	20	TRUE	Octopus	genome	aa	Aa	1183
HG002	NovaSeq	20	TRUE	Octopus	notinAllTandemRepeatsandHomopolymers	Aa	aa	776
HG002	NovaSeq	20	TRUE	Octopus	notinAllTandemRepeatsandHomopolymers	aa	Aa	1094
HG002	NovaSeq	20	TRUE	Octopus	notinalldifficult	Aa	aa	300
HG002	NovaSeq	20	TRUE	Octopus	notinalldifficult	aa	Aa	32
HG002	NovaSeq	20	TRUE	Octopus	notinalllowmapandsegdup	Aa	aa	1024
HG002	NovaSeq	20	TRUE	Octopus	notinalllowmapandsegdup	aa	Aa	100
HG002	NovaSeq	30	FALSE	FreeBayes	AllTandemRepeatsandHomopolymers	Aa	aa	8
HG002	NovaSeq	30	FALSE	FreeBayes	AllTandemRepeatsandHomopolymers	aa	Aa	266
HG002	NovaSeq	30	FALSE	FreeBayes	alldifficult	Aa	aa	262
HG002	NovaSeq	30	FALSE	FreeBayes	alldifficult	aa	Aa	3057
HG002	NovaSeq	30	FALSE	FreeBayes	alllowmapandsegdup	Aa	aa	242
HG002	NovaSeq	30	FALSE	FreeBayes	alllowmapandsegdup	aa	Aa	2813
HG002	NovaSeq	30	FALSE	FreeBayes	genome	Aa	aa	287
HG002	NovaSeq	30	FALSE	FreeBayes	genome	aa	Aa	3576
HG002	NovaSeq	30	FALSE	FreeBayes	notinAllTandemRepeatsandHomopolymers	Aa	aa	279
HG002	NovaSeq	30	FALSE	FreeBayes	notinAllTandemRepeatsandHomopolymers	aa	Aa	3310
HG002	NovaSeq	30	FALSE	FreeBayes	notinalldifficult	Aa	aa	25
HG002	NovaSeq	30	FALSE	FreeBayes	notinalldifficult	aa	Aa	519
HG002	NovaSeq	30	FALSE	FreeBayes	notinalllowmapandsegdup	Aa	aa	45
HG002	NovaSeq	30	FALSE	FreeBayes	notinalllowmapandsegdup	aa	Aa	763
HG002	NovaSeq	30	FALSE	GATK4	AllTandemRepeatsandHomopolymers	Aa	aa	168
HG002	NovaSeq	30	FALSE	GATK4	AllTandemRepeatsandHomopolymers	aa	Aa	847
HG002	NovaSeq	30	FALSE	GATK4	alldifficult	Aa	aa	460
HG002	NovaSeq	30	FALSE	GATK4	alldifficult	aa	Aa	4046
HG002	NovaSeq	30	FALSE	GATK4	alllowmapandsegdup	Aa	aa	267
HG002	NovaSeq	30	FALSE	GATK4	alllowmapandsegdup	aa	Aa	3198
HG002	NovaSeq	30	FALSE	GATK4	genome	Aa	aa	483
HG002	NovaSeq	30	FALSE	GATK4	genome	aa	Aa	5200
HG002	NovaSeq	30	FALSE	GATK4	notinAllTandemRepeatsandHomopolymers	Aa	aa	315
HG002	NovaSeq	30	FALSE	GATK4	notinAllTandemRepeatsandHomopolymers	aa	Aa	4352
HG002	NovaSeq	30	FALSE	GATK4	notinalldifficult	Aa	aa	23
HG002	NovaSeq	30	FALSE	GATK4	notinalldifficult	aa	Aa	1153
HG002	NovaSeq	30	FALSE	GATK4	notinalllowmapandsegdup	Aa	aa	216
HG002	NovaSeq	30	FALSE	GATK4	notinalllowmapandsegdup	aa	Aa	2000
HG002	NovaSeq	30	FALSE	Octopus	AllTandemRepeatsandHomopolymers	Aa	aa	188
HG002	NovaSeq	30	FALSE	Octopus	AllTandemRepeatsandHomopolymers	aa	Aa	218
HG002	NovaSeq	30	FALSE	Octopus	alldifficult	Aa	aa	617
HG002	NovaSeq	30	FALSE	Octopus	alldifficult	aa	Aa	2355
HG002	NovaSeq	30	FALSE	Octopus	alllowmapandsegdup	Aa	aa	391
HG002	NovaSeq	30	FALSE	Octopus	alllowmapandsegdup	aa	Aa	2138
HG002	NovaSeq	30	FALSE	Octopus	genome	Aa	aa	632
HG002	NovaSeq	30	FALSE	Octopus	genome	aa	Aa	3149
HG002	NovaSeq	30	FALSE	Octopus	notinAllTandemRepeatsandHomopolymers	Aa	aa	444
HG002	NovaSeq	30	FALSE	Octopus	notinAllTandemRepeatsandHomopolymers	aa	Aa	2930
HG002	NovaSeq	30	FALSE	Octopus	notinalldifficult	Aa	aa	15
HG002	NovaSeq	30	FALSE	Octopus	notinalldifficult	aa	Aa	794
HG002	NovaSeq	30	FALSE	Octopus	notinalllowmapandsegdup	Aa	aa	241
HG002	NovaSeq	30	FALSE	Octopus	notinalllowmapandsegdup	aa	Aa	1011
HG002	NovaSeq	30	TRUE	FreeBayes	AllTandemRepeatsandHomopolymers	Aa	aa	5
HG002	NovaSeq	30	TRUE	FreeBayes	AllTandemRepeatsandHomopolymers	aa	Aa	79
HG002	NovaSeq	30	TRUE	FreeBayes	alldifficult	Aa	aa	147
HG002	NovaSeq	30	TRUE	FreeBayes	alldifficult	aa	Aa	896
HG002	NovaSeq	30	TRUE	FreeBayes	alllowmapandsegdup	Aa	aa	128
HG002	NovaSeq	30	TRUE	FreeBayes	alllowmapandsegdup	aa	Aa	828
HG002	NovaSeq	30	TRUE	FreeBayes	genome	Aa	aa	171
HG002	NovaSeq	30	TRUE	FreeBayes	genome	aa	Aa	958
HG002	NovaSeq	30	TRUE	FreeBayes	notinAllTandemRepeatsandHomopolymers	Aa	aa	166
HG002	NovaSeq	30	TRUE	FreeBayes	notinAllTandemRepeatsandHomopolymers	aa	Aa	879
HG002	NovaSeq	30	TRUE	FreeBayes	notinalldifficult	Aa	aa	24
HG002	NovaSeq	30	TRUE	FreeBayes	notinalldifficult	aa	Aa	62
HG002	NovaSeq	30	TRUE	FreeBayes	notinalllowmapandsegdup	Aa	aa	43
HG002	NovaSeq	30	TRUE	FreeBayes	notinalllowmapandsegdup	aa	Aa	130
HG002	NovaSeq	30	TRUE	GATK4	AllTandemRepeatsandHomopolymers	Aa	aa	144
HG002	NovaSeq	30	TRUE	GATK4	AllTandemRepeatsandHomopolymers	aa	Aa	746
HG002	NovaSeq	30	TRUE	GATK4	alldifficult	Aa	aa	247
HG002	NovaSeq	30	TRUE	GATK4	alldifficult	aa	Aa	1913
HG002	NovaSeq	30	TRUE	GATK4	alllowmapandsegdup	Aa	aa	78
HG002	NovaSeq	30	TRUE	GATK4	alllowmapandsegdup	aa	Aa	1125
HG002	NovaSeq	30	TRUE	GATK4	genome	Aa	aa	270
HG002	NovaSeq	30	TRUE	GATK4	genome	aa	Aa	3048
HG002	NovaSeq	30	TRUE	GATK4	notinAllTandemRepeatsandHomopolymers	Aa	aa	126
HG002	NovaSeq	30	TRUE	GATK4	notinAllTandemRepeatsandHomopolymers	aa	Aa	2300
HG002	NovaSeq	30	TRUE	GATK4	notinalldifficult	Aa	aa	23
HG002	NovaSeq	30	TRUE	GATK4	notinalldifficult	aa	Aa	1134
HG002	NovaSeq	30	TRUE	GATK4	notinalllowmapandsegdup	Aa	aa	192
HG002	NovaSeq	30	TRUE	GATK4	notinalllowmapandsegdup	aa	Aa	1921
HG002	NovaSeq	30	TRUE	Octopus	AllTandemRepeatsandHomopolymers	Aa	aa	191
HG002	NovaSeq	30	TRUE	Octopus	AllTandemRepeatsandHomopolymers	aa	Aa	76
HG002	NovaSeq	30	TRUE	Octopus	alldifficult	Aa	aa	443
HG002	NovaSeq	30	TRUE	Octopus	alldifficult	aa	Aa	1223
HG002	NovaSeq	30	TRUE	Octopus	alllowmapandsegdup	Aa	aa	215
HG002	NovaSeq	30	TRUE	Octopus	alllowmapandsegdup	aa	Aa	1178
HG002	NovaSeq	30	TRUE	Octopus	genome	Aa	aa	457
HG002	NovaSeq	30	TRUE	Octopus	genome	aa	Aa	1247
HG002	NovaSeq	30	TRUE	Octopus	notinAllTandemRepeatsandHomopolymers	Aa	aa	266
HG002	NovaSeq	30	TRUE	Octopus	notinAllTandemRepeatsandHomopolymers	aa	Aa	1171
HG002	NovaSeq	30	TRUE	Octopus	notinalldifficult	Aa	aa	14
HG002	NovaSeq	30	TRUE	Octopus	notinalldifficult	aa	Aa	24
HG002	NovaSeq	30	TRUE	Octopus	notinalllowmapandsegdup	Aa	aa	242
HG002	NovaSeq	30	TRUE	Octopus	notinalllowmapandsegdup	aa	Aa	69
HG002+HG003+HG004	NovaSeq	10	FALSE	FreeBayes	AllTandemRepeatsandHomopolymers	AAAAAa	AAAAaa	8297
HG002+HG003+HG004	NovaSeq	10	FALSE	FreeBayes	AllTandemRepeatsandHomopolymers	AAAAAa	AAAaaa	1298
HG002+HG003+HG004	NovaSeq	10	FALSE	FreeBayes	AllTandemRepeatsandHomopolymers	AAAAAa	AAaaaa	136
HG002+HG003+HG004	NovaSeq	10	FALSE	FreeBayes	AllTandemRepeatsandHomopolymers	AAAAAa	Aaaaaa	6
HG002+HG003+HG004	NovaSeq	10	FALSE	FreeBayes	AllTandemRepeatsandHomopolymers	AAAAAa	aaaaaa	8
HG002+HG003+HG004	NovaSeq	10	FALSE	FreeBayes	AllTandemRepeatsandHomopolymers	AAAAaa	AAAAAa	7335
HG002+HG003+HG004	NovaSeq	10	FALSE	FreeBayes	AllTandemRepeatsandHomopolymers	AAAAaa	AAAaaa	10538
HG002+HG003+HG004	NovaSeq	10	FALSE	FreeBayes	AllTandemRepeatsandHomopolymers	AAAAaa	AAaaaa	2243
HG002+HG003+HG004	NovaSeq	10	FALSE	FreeBayes	AllTandemRepeatsandHomopolymers	AAAAaa	Aaaaaa	228
HG002+HG003+HG004	NovaSeq	10	FALSE	FreeBayes	AllTandemRepeatsandHomopolymers	AAAAaa	aaaaaa	41
HG002+HG003+HG004	NovaSeq	10	FALSE	FreeBayes	AllTandemRepeatsandHomopolymers	AAAaaa	AAAAAa	908
HG002+HG003+HG004	NovaSeq	10	FALSE	FreeBayes	AllTandemRepeatsandHomopolymers	AAAaaa	AAAAaa	6422
HG002+HG003+HG004	NovaSeq	10	FALSE	FreeBayes	AllTandemRepeatsandHomopolymers	AAAaaa	AAaaaa	6335
HG002+HG003+HG004	NovaSeq	10	FALSE	FreeBayes	AllTandemRepeatsandHomopolymers	AAAaaa	Aaaaaa	1317
HG002+HG003+HG004	NovaSeq	10	FALSE	FreeBayes	AllTandemRepeatsandHomopolymers	AAAaaa	aaaaaa	145
HG002+HG003+HG004	NovaSeq	10	FALSE	FreeBayes	AllTandemRepeatsandHomopolymers	AAaaaa	AAAAAa	57
HG002+HG003+HG004	NovaSeq	10	FALSE	FreeBayes	AllTandemRepeatsandHomopolymers	AAaaaa	AAAAaa	1027
HG002+HG003+HG004	NovaSeq	10	FALSE	FreeBayes	AllTandemRepeatsandHomopolymers	AAaaaa	AAAaaa	4821
HG002+HG003+HG004	NovaSeq	10	FALSE	FreeBayes	AllTandemRepeatsandHomopolymers	AAaaaa	Aaaaaa	4921
HG002+HG003+HG004	NovaSeq	10	FALSE	FreeBayes	AllTandemRepeatsandHomopolymers	AAaaaa	aaaaaa	597
HG002+HG003+HG004	NovaSeq	10	FALSE	FreeBayes	AllTandemRepeatsandHomopolymers	Aaaaaa	AAAAAa	2
HG002+HG003+HG004	NovaSeq	10	FALSE	FreeBayes	AllTandemRepeatsandHomopolymers	Aaaaaa	AAAAaa	56
HG002+HG003+HG004	NovaSeq	10	FALSE	FreeBayes	AllTandemRepeatsandHomopolymers	Aaaaaa	AAAaaa	511
HG002+HG003+HG004	NovaSeq	10	FALSE	FreeBayes	AllTandemRepeatsandHomopolymers	Aaaaaa	AAaaaa	3242
HG002+HG003+HG004	NovaSeq	10	FALSE	FreeBayes	AllTandemRepeatsandHomopolymers	Aaaaaa	aaaaaa	2526
HG002+HG003+HG004	NovaSeq	10	FALSE	FreeBayes	AllTandemRepeatsandHomopolymers	aaaaaa	AAAAaa	2
HG002+HG003+HG004	NovaSeq	10	FALSE	FreeBayes	AllTandemRepeatsandHomopolymers	aaaaaa	AAAaaa	4
HG002+HG003+HG004	NovaSeq	10	FALSE	FreeBayes	AllTandemRepeatsandHomopolymers	aaaaaa	AAaaaa	29
HG002+HG003+HG004	NovaSeq	10	FALSE	FreeBayes	AllTandemRepeatsandHomopolymers	aaaaaa	Aaaaaa	515
HG002+HG003+HG004	NovaSeq	10	FALSE	FreeBayes	alldifficult	AAAAAa	AAAAaa	31624
HG002+HG003+HG004	NovaSeq	10	FALSE	FreeBayes	alldifficult	AAAAAa	AAAaaa	4813
HG002+HG003+HG004	NovaSeq	10	FALSE	FreeBayes	alldifficult	AAAAAa	AAaaaa	525
HG002+HG003+HG004	NovaSeq	10	FALSE	FreeBayes	alldifficult	AAAAAa	Aaaaaa	27
HG002+HG003+HG004	NovaSeq	10	FALSE	FreeBayes	alldifficult	AAAAAa	aaaaaa	31
HG002+HG003+HG004	NovaSeq	10	FALSE	FreeBayes	alldifficult	AAAAaa	AAAAAa	28934
HG002+HG003+HG004	NovaSeq	10	FALSE	FreeBayes	alldifficult	AAAAaa	AAAaaa	38904
HG002+HG003+HG004	NovaSeq	10	FALSE	FreeBayes	alldifficult	AAAAaa	AAaaaa	8135
HG002+HG003+HG004	NovaSeq	10	FALSE	FreeBayes	alldifficult	AAAAaa	Aaaaaa	819
HG002+HG003+HG004	NovaSeq	10	FALSE	FreeBayes	alldifficult	AAAAaa	aaaaaa	191
HG002+HG003+HG004	NovaSeq	10	FALSE	FreeBayes	alldifficult	AAAaaa	AAAAAa	3911
HG002+HG003+HG004	NovaSeq	10	FALSE	FreeBayes	alldifficult	AAAaaa	AAAAaa	26640
HG002+HG003+HG004	NovaSeq	10	FALSE	FreeBayes	alldifficult	AAAaaa	AAaaaa	23830
HG002+HG003+HG004	NovaSeq	10	FALSE	FreeBayes	alldifficult	AAAaaa	Aaaaaa	4734
HG002+HG003+HG004	NovaSeq	10	FALSE	FreeBayes	alldifficult	AAAaaa	aaaaaa	641
HG002+HG003+HG004	NovaSeq	10	FALSE	FreeBayes	alldifficult	AAaaaa	AAAAAa	339
HG002+HG003+HG004	NovaSeq	10	FALSE	FreeBayes	alldifficult	AAaaaa	AAAAaa	4994
HG002+HG003+HG004	NovaSeq	10	FALSE	FreeBayes	alldifficult	AAaaaa	AAAaaa	20126
HG002+HG003+HG004	NovaSeq	10	FALSE	FreeBayes	alldifficult	AAaaaa	Aaaaaa	18363
HG002+HG003+HG004	NovaSeq	10	FALSE	FreeBayes	alldifficult	AAaaaa	aaaaaa	2467
HG002+HG003+HG004	NovaSeq	10	FALSE	FreeBayes	alldifficult	Aaaaaa	AAAAAa	16
HG002+HG003+HG004	NovaSeq	10	FALSE	FreeBayes	alldifficult	Aaaaaa	AAAAaa	453
HG002+HG003+HG004	NovaSeq	10	FALSE	FreeBayes	alldifficult	Aaaaaa	AAAaaa	2698
HG002+HG003+HG004	NovaSeq	10	FALSE	FreeBayes	alldifficult	Aaaaaa	AAaaaa	13978
HG002+HG003+HG004	NovaSeq	10	FALSE	FreeBayes	alldifficult	Aaaaaa	aaaaaa	9894
HG002+HG003+HG004	NovaSeq	10	FALSE	FreeBayes	alldifficult	aaaaaa	AAAAAa	7
HG002+HG003+HG004	NovaSeq	10	FALSE	FreeBayes	alldifficult	aaaaaa	AAAAaa	57
HG002+HG003+HG004	NovaSeq	10	FALSE	FreeBayes	alldifficult	aaaaaa	AAAaaa	130
HG002+HG003+HG004	NovaSeq	10	FALSE	FreeBayes	alldifficult	aaaaaa	AAaaaa	480
HG002+HG003+HG004	NovaSeq	10	FALSE	FreeBayes	alldifficult	aaaaaa	Aaaaaa	1962
HG002+HG003+HG004	NovaSeq	10	FALSE	FreeBayes	alllowmapandsegdup	AAAAAa	AAAAaa	12607
HG002+HG003+HG004	NovaSeq	10	FALSE	FreeBayes	alllowmapandsegdup	AAAAAa	AAAaaa	1908
HG002+HG003+HG004	NovaSeq	10	FALSE	FreeBayes	alllowmapandsegdup	AAAAAa	AAaaaa	222
HG002+HG003+HG004	NovaSeq	10	FALSE	FreeBayes	alllowmapandsegdup	AAAAAa	Aaaaaa	12
HG002+HG003+HG004	NovaSeq	10	FALSE	FreeBayes	alllowmapandsegdup	AAAAAa	aaaaaa	17
HG002+HG003+HG004	NovaSeq	10	FALSE	FreeBayes	alllowmapandsegdup	AAAAaa	AAAAAa	11235
HG002+HG003+HG004	NovaSeq	10	FALSE	FreeBayes	alllowmapandsegdup	AAAAaa	AAAaaa	14080
HG002+HG003+HG004	NovaSeq	10	FALSE	FreeBayes	alllowmapandsegdup	AAAAaa	AAaaaa	3033
HG002+HG003+HG004	NovaSeq	10	FALSE	FreeBayes	alllowmapandsegdup	AAAAaa	Aaaaaa	291
HG002+HG003+HG004	NovaSeq	10	FALSE	FreeBayes	alllowmapandsegdup	AAAAaa	aaaaaa	105
HG002+HG003+HG004	NovaSeq	10	FALSE	FreeBayes	alllowmapandsegdup	AAAaaa	AAAAAa	1824
HG002+HG003+HG004	NovaSeq	10	FALSE	FreeBayes	alllowmapandsegdup	AAAaaa	AAAAaa	11305
HG002+HG003+HG004	NovaSeq	10	FALSE	FreeBayes	alllowmapandsegdup	AAAaaa	AAaaaa	8804
HG002+HG003+HG004	NovaSeq	10	FALSE	FreeBayes	alllowmapandsegdup	AAAaaa	Aaaaaa	1670
HG002+HG003+HG004	NovaSeq	10	FALSE	FreeBayes	alllowmapandsegdup	AAAaaa	aaaaaa	317
HG002+HG003+HG004	NovaSeq	10	FALSE	FreeBayes	alllowmapandsegdup	AAaaaa	AAAAAa	186
HG002+HG003+HG004	NovaSeq	10	FALSE	FreeBayes	alllowmapandsegdup	AAaaaa	AAAAaa	2538
HG002+HG003+HG004	NovaSeq	10	FALSE	FreeBayes	alllowmapandsegdup	AAaaaa	AAAaaa	8388
HG002+HG003+HG004	NovaSeq	10	FALSE	FreeBayes	alllowmapandsegdup	AAaaaa	Aaaaaa	6442
HG002+HG003+HG004	NovaSeq	10	FALSE	FreeBayes	alllowmapandsegdup	AAaaaa	aaaaaa	1045
HG002+HG003+HG004	NovaSeq	10	FALSE	FreeBayes	alllowmapandsegdup	Aaaaaa	AAAAAa	14
HG002+HG003+HG004	NovaSeq	10	FALSE	FreeBayes	alllowmapandsegdup	Aaaaaa	AAAAaa	337
HG002+HG003+HG004	NovaSeq	10	FALSE	FreeBayes	alllowmapandsegdup	Aaaaaa	AAAaaa	1487
HG002+HG003+HG004	NovaSeq	10	FALSE	FreeBayes	alllowmapandsegdup	Aaaaaa	AAaaaa	6172
HG002+HG003+HG004	NovaSeq	10	FALSE	FreeBayes	alllowmapandsegdup	Aaaaaa	aaaaaa	4272
HG002+HG003+HG004	NovaSeq	10	FALSE	FreeBayes	alllowmapandsegdup	aaaaaa	AAAAAa	7
HG002+HG003+HG004	NovaSeq	10	FALSE	FreeBayes	alllowmapandsegdup	aaaaaa	AAAAaa	56
HG002+HG003+HG004	NovaSeq	10	FALSE	FreeBayes	alllowmapandsegdup	aaaaaa	AAAaaa	125
HG002+HG003+HG004	NovaSeq	10	FALSE	FreeBayes	alllowmapandsegdup	aaaaaa	AAaaaa	447
HG002+HG003+HG004	NovaSeq	10	FALSE	FreeBayes	alllowmapandsegdup	aaaaaa	Aaaaaa	1126
HG002+HG003+HG004	NovaSeq	10	FALSE	FreeBayes	genome	AAAAAa	AAAAaa	191136
HG002+HG003+HG004	NovaSeq	10	FALSE	FreeBayes	genome	AAAAAa	AAAaaa	29275
HG002+HG003+HG004	NovaSeq	10	FALSE	FreeBayes	genome	AAAAAa	AAaaaa	3031
HG002+HG003+HG004	NovaSeq	10	FALSE	FreeBayes	genome	AAAAAa	Aaaaaa	156
HG002+HG003+HG004	NovaSeq	10	FALSE	FreeBayes	genome	AAAAAa	aaaaaa	92
HG002+HG003+HG004	NovaSeq	10	FALSE	FreeBayes	genome	AAAAaa	AAAAAa	177090
HG002+HG003+HG004	NovaSeq	10	FALSE	FreeBayes	genome	AAAAaa	AAAaaa	248783
HG002+HG003+HG004	NovaSeq	10	FALSE	FreeBayes	genome	AAAAaa	AAaaaa	51359
HG002+HG003+HG004	NovaSeq	10	FALSE	FreeBayes	genome	AAAAaa	Aaaaaa	5019
HG002+HG003+HG004	NovaSeq	10	FALSE	FreeBayes	genome	AAAAaa	aaaaaa	853
HG002+HG003+HG004	NovaSeq	10	FALSE	FreeBayes	genome	AAAaaa	AAAAAa	21408
HG002+HG003+HG004	NovaSeq	10	FALSE	FreeBayes	genome	AAAaaa	AAAAaa	157999
HG002+HG003+HG004	NovaSeq	10	FALSE	FreeBayes	genome	AAAaaa	AAaaaa	155501
HG002+HG003+HG004	NovaSeq	10	FALSE	FreeBayes	genome	AAAaaa	Aaaaaa	31340
HG002+HG003+HG004	NovaSeq	10	FALSE	FreeBayes	genome	AAAaaa	aaaaaa	3219
HG002+HG003+HG004	NovaSeq	10	FALSE	FreeBayes	genome	AAaaaa	AAAAAa	1346
HG002+HG003+HG004	NovaSeq	10	FALSE	FreeBayes	genome	AAaaaa	AAAAaa	26003
HG002+HG003+HG004	NovaSeq	10	FALSE	FreeBayes	genome	AAaaaa	AAAaaa	122710
HG002+HG003+HG004	NovaSeq	10	FALSE	FreeBayes	genome	AAaaaa	Aaaaaa	123560
HG002+HG003+HG004	NovaSeq	10	FALSE	FreeBayes	genome	AAaaaa	aaaaaa	14646
HG002+HG003+HG004	NovaSeq	10	FALSE	FreeBayes	genome	Aaaaaa	AAAAAa	25
HG002+HG003+HG004	NovaSeq	10	FALSE	FreeBayes	genome	Aaaaaa	AAAAaa	1325
HG002+HG003+HG004	NovaSeq	10	FALSE	FreeBayes	genome	Aaaaaa	AAAaaa	12625
HG002+HG003+HG004	NovaSeq	10	FALSE	FreeBayes	genome	Aaaaaa	AAaaaa	79245
HG002+HG003+HG004	NovaSeq	10	FALSE	FreeBayes	genome	Aaaaaa	aaaaaa	58507
HG002+HG003+HG004	NovaSeq	10	FALSE	FreeBayes	genome	aaaaaa	AAAAAa	7
HG002+HG003+HG004	NovaSeq	10	FALSE	FreeBayes	genome	aaaaaa	AAAAaa	59
HG002+HG003+HG004	NovaSeq	10	FALSE	FreeBayes	genome	aaaaaa	AAAaaa	135
HG002+HG003+HG004	NovaSeq	10	FALSE	FreeBayes	genome	aaaaaa	AAaaaa	595
HG002+HG003+HG004	NovaSeq	10	FALSE	FreeBayes	genome	aaaaaa	Aaaaaa	6973
HG002+HG003+HG004	NovaSeq	10	FALSE	FreeBayes	notinAllTandemRepeatsandHomopolymers	AAAAAa	AAAAaa	182839
HG002+HG003+HG004	NovaSeq	10	FALSE	FreeBayes	notinAllTandemRepeatsandHomopolymers	AAAAAa	AAAaaa	27977
HG002+HG003+HG004	NovaSeq	10	FALSE	FreeBayes	notinAllTandemRepeatsandHomopolymers	AAAAAa	AAaaaa	2895
HG002+HG003+HG004	NovaSeq	10	FALSE	FreeBayes	notinAllTandemRepeatsandHomopolymers	AAAAAa	Aaaaaa	150
HG002+HG003+HG004	NovaSeq	10	FALSE	FreeBayes	notinAllTandemRepeatsandHomopolymers	AAAAAa	aaaaaa	84
HG002+HG003+HG004	NovaSeq	10	FALSE	FreeBayes	notinAllTandemRepeatsandHomopolymers	AAAAaa	AAAAAa	169755
HG002+HG003+HG004	NovaSeq	10	FALSE	FreeBayes	notinAllTandemRepeatsandHomopolymers	AAAAaa	AAAaaa	238245
HG002+HG003+HG004	NovaSeq	10	FALSE	FreeBayes	notinAllTandemRepeatsandHomopolymers	AAAAaa	AAaaaa	49116
HG002+HG003+HG004	NovaSeq	10	FALSE	FreeBayes	notinAllTandemRepeatsandHomopolymers	AAAAaa	Aaaaaa	4791
HG002+HG003+HG004	NovaSeq	10	FALSE	FreeBayes	notinAllTandemRepeatsandHomopolymers	AAAAaa	aaaaaa	812
HG002+HG003+HG004	NovaSeq	10	FALSE	FreeBayes	notinAllTandemRepeatsandHomopolymers	AAAaaa	AAAAAa	20500
HG002+HG003+HG004	NovaSeq	10	FALSE	FreeBayes	notinAllTandemRepeatsandHomopolymers	AAAaaa	AAAAaa	151577
HG002+HG003+HG004	NovaSeq	10	FALSE	FreeBayes	notinAllTandemRepeatsandHomopolymers	AAAaaa	AAaaaa	149166
HG002+HG003+HG004	NovaSeq	10	FALSE	FreeBayes	notinAllTandemRepeatsandHomopolymers	AAAaaa	Aaaaaa	30023
HG002+HG003+HG004	NovaSeq	10	FALSE	FreeBayes	notinAllTandemRepeatsandHomopolymers	AAAaaa	aaaaaa	3074
HG002+HG003+HG004	NovaSeq	10	FALSE	FreeBayes	notinAllTandemRepeatsandHomopolymers	AAaaaa	AAAAAa	1289
HG002+HG003+HG004	NovaSeq	10	FALSE	FreeBayes	notinAllTandemRepeatsandHomopolymers	AAaaaa	AAAAaa	24976
HG002+HG003+HG004	NovaSeq	10	FALSE	FreeBayes	notinAllTandemRepeatsandHomopolymers	AAaaaa	AAAaaa	117889
HG002+HG003+HG004	NovaSeq	10	FALSE	FreeBayes	notinAllTandemRepeatsandHomopolymers	AAaaaa	Aaaaaa	118639
HG002+HG003+HG004	NovaSeq	10	FALSE	FreeBayes	notinAllTandemRepeatsandHomopolymers	AAaaaa	aaaaaa	14049
HG002+HG003+HG004	NovaSeq	10	FALSE	FreeBayes	notinAllTandemRepeatsandHomopolymers	Aaaaaa	AAAAAa	23
HG002+HG003+HG004	NovaSeq	10	FALSE	FreeBayes	notinAllTandemRepeatsandHomopolymers	Aaaaaa	AAAAaa	1269
HG002+HG003+HG004	NovaSeq	10	FALSE	FreeBayes	notinAllTandemRepeatsandHomopolymers	Aaaaaa	AAAaaa	12114
HG002+HG003+HG004	NovaSeq	10	FALSE	FreeBayes	notinAllTandemRepeatsandHomopolymers	Aaaaaa	AAaaaa	76003
HG002+HG003+HG004	NovaSeq	10	FALSE	FreeBayes	notinAllTandemRepeatsandHomopolymers	Aaaaaa	aaaaaa	55981
HG002+HG003+HG004	NovaSeq	10	FALSE	FreeBayes	notinAllTandemRepeatsandHomopolymers	aaaaaa	AAAAAa	7
HG002+HG003+HG004	NovaSeq	10	FALSE	FreeBayes	notinAllTandemRepeatsandHomopolymers	aaaaaa	AAAAaa	57
HG002+HG003+HG004	NovaSeq	10	FALSE	FreeBayes	notinAllTandemRepeatsandHomopolymers	aaaaaa	AAAaaa	131
HG002+HG003+HG004	NovaSeq	10	FALSE	FreeBayes	notinAllTandemRepeatsandHomopolymers	aaaaaa	AAaaaa	566
HG002+HG003+HG004	NovaSeq	10	FALSE	FreeBayes	notinAllTandemRepeatsandHomopolymers	aaaaaa	Aaaaaa	6458
HG002+HG003+HG004	NovaSeq	10	FALSE	FreeBayes	notinalldifficult	AAAAAa	AAAAaa	159512
HG002+HG003+HG004	NovaSeq	10	FALSE	FreeBayes	notinalldifficult	AAAAAa	AAAaaa	24462
HG002+HG003+HG004	NovaSeq	10	FALSE	FreeBayes	notinalldifficult	AAAAAa	AAaaaa	2506
HG002+HG003+HG004	NovaSeq	10	FALSE	FreeBayes	notinalldifficult	AAAAAa	Aaaaaa	129
HG002+HG003+HG004	NovaSeq	10	FALSE	FreeBayes	notinalldifficult	AAAAAa	aaaaaa	61
HG002+HG003+HG004	NovaSeq	10	FALSE	FreeBayes	notinalldifficult	AAAAaa	AAAAAa	148156
HG002+HG003+HG004	NovaSeq	10	FALSE	FreeBayes	notinalldifficult	AAAAaa	AAAaaa	209879
HG002+HG003+HG004	NovaSeq	10	FALSE	FreeBayes	notinalldifficult	AAAAaa	AAaaaa	43224
HG002+HG003+HG004	NovaSeq	10	FALSE	FreeBayes	notinalldifficult	AAAAaa	Aaaaaa	4200
HG002+HG003+HG004	NovaSeq	10	FALSE	FreeBayes	notinalldifficult	AAAAaa	aaaaaa	662
HG002+HG003+HG004	NovaSeq	10	FALSE	FreeBayes	notinalldifficult	AAAaaa	AAAAAa	17497
HG002+HG003+HG004	NovaSeq	10	FALSE	FreeBayes	notinalldifficult	AAAaaa	AAAAaa	131359
HG002+HG003+HG004	NovaSeq	10	FALSE	FreeBayes	notinalldifficult	AAAaaa	AAaaaa	131671
HG002+HG003+HG004	NovaSeq	10	FALSE	FreeBayes	notinalldifficult	AAAaaa	Aaaaaa	26606
HG002+HG003+HG004	NovaSeq	10	FALSE	FreeBayes	notinalldifficult	AAAaaa	aaaaaa	2578
HG002+HG003+HG004	NovaSeq	10	FALSE	FreeBayes	notinalldifficult	AAaaaa	AAAAAa	1007
HG002+HG003+HG004	NovaSeq	10	FALSE	FreeBayes	notinalldifficult	AAaaaa	AAAAaa	21009
HG002+HG003+HG004	NovaSeq	10	FALSE	FreeBayes	notinalldifficult	AAaaaa	AAAaaa	102584
HG002+HG003+HG004	NovaSeq	10	FALSE	FreeBayes	notinalldifficult	AAaaaa	Aaaaaa	105197
HG002+HG003+HG004	NovaSeq	10	FALSE	FreeBayes	notinalldifficult	AAaaaa	aaaaaa	12179
HG002+HG003+HG004	NovaSeq	10	FALSE	FreeBayes	notinalldifficult	Aaaaaa	AAAAAa	9
HG002+HG003+HG004	NovaSeq	10	FALSE	FreeBayes	notinalldifficult	Aaaaaa	AAAAaa	872
HG002+HG003+HG004	NovaSeq	10	FALSE	FreeBayes	notinalldifficult	Aaaaaa	AAAaaa	9927
HG002+HG003+HG004	NovaSeq	10	FALSE	FreeBayes	notinalldifficult	Aaaaaa	AAaaaa	65267
HG002+HG003+HG004	NovaSeq	10	FALSE	FreeBayes	notinalldifficult	Aaaaaa	aaaaaa	48613
HG002+HG003+HG004	NovaSeq	10	FALSE	FreeBayes	notinalldifficult	aaaaaa	AAAAaa	2
HG002+HG003+HG004	NovaSeq	10	FALSE	FreeBayes	notinalldifficult	aaaaaa	AAAaaa	5
HG002+HG003+HG004	NovaSeq	10	FALSE	FreeBayes	notinalldifficult	aaaaaa	AAaaaa	115
HG002+HG003+HG004	NovaSeq	10	FALSE	FreeBayes	notinalldifficult	aaaaaa	Aaaaaa	5011
HG002+HG003+HG004	NovaSeq	10	FALSE	FreeBayes	notinalllowmapandsegdup	AAAAAa	AAAAaa	178529
HG002+HG003+HG004	NovaSeq	10	FALSE	FreeBayes	notinalllowmapandsegdup	AAAAAa	AAAaaa	27367
HG002+HG003+HG004	NovaSeq	10	FALSE	FreeBayes	notinalllowmapandsegdup	AAAAAa	AAaaaa	2809
HG002+HG003+HG004	NovaSeq	10	FALSE	FreeBayes	notinalllowmapandsegdup	AAAAAa	Aaaaaa	144
HG002+HG003+HG004	NovaSeq	10	FALSE	FreeBayes	notinalllowmapandsegdup	AAAAAa	aaaaaa	75
HG002+HG003+HG004	NovaSeq	10	FALSE	FreeBayes	notinalllowmapandsegdup	AAAAaa	AAAAAa	165855
HG002+HG003+HG004	NovaSeq	10	FALSE	FreeBayes	notinalllowmapandsegdup	AAAAaa	AAAaaa	234703
HG002+HG003+HG004	NovaSeq	10	FALSE	FreeBayes	notinalllowmapandsegdup	AAAAaa	AAaaaa	48326
HG002+HG003+HG004	NovaSeq	10	FALSE	FreeBayes	notinalllowmapandsegdup	AAAAaa	Aaaaaa	4728
HG002+HG003+HG004	NovaSeq	10	FALSE	FreeBayes	notinalllowmapandsegdup	AAAAaa	aaaaaa	748
HG002+HG003+HG004	NovaSeq	10	FALSE	FreeBayes	notinalllowmapandsegdup	AAAaaa	AAAAAa	19584
HG002+HG003+HG004	NovaSeq	10	FALSE	FreeBayes	notinalllowmapandsegdup	AAAaaa	AAAAaa	146694
HG002+HG003+HG004	NovaSeq	10	FALSE	FreeBayes	notinalllowmapandsegdup	AAAaaa	AAaaaa	146697
HG002+HG003+HG004	NovaSeq	10	FALSE	FreeBayes	notinalllowmapandsegdup	AAAaaa	Aaaaaa	29670
HG002+HG003+HG004	NovaSeq	10	FALSE	FreeBayes	notinalllowmapandsegdup	AAAaaa	aaaaaa	2902
HG002+HG003+HG004	NovaSeq	10	FALSE	FreeBayes	notinalllowmapandsegdup	AAaaaa	AAAAAa	1160
HG002+HG003+HG004	NovaSeq	10	FALSE	FreeBayes	notinalllowmapandsegdup	AAaaaa	AAAAaa	23465
HG002+HG003+HG004	NovaSeq	10	FALSE	FreeBayes	notinalllowmapandsegdup	AAaaaa	AAAaaa	114322
HG002+HG003+HG004	NovaSeq	10	FALSE	FreeBayes	notinalllowmapandsegdup	AAaaaa	Aaaaaa	117118
HG002+HG003+HG004	NovaSeq	10	FALSE	FreeBayes	notinalllowmapandsegdup	AAaaaa	aaaaaa	13601
HG002+HG003+HG004	NovaSeq	10	FALSE	FreeBayes	notinalllowmapandsegdup	Aaaaaa	AAAAAa	11
HG002+HG003+HG004	NovaSeq	10	FALSE	FreeBayes	notinalllowmapandsegdup	Aaaaaa	AAAAaa	988
HG002+HG003+HG004	NovaSeq	10	FALSE	FreeBayes	notinalllowmapandsegdup	Aaaaaa	AAAaaa	11138
HG002+HG003+HG004	NovaSeq	10	FALSE	FreeBayes	notinalllowmapandsegdup	Aaaaaa	AAaaaa	73073
HG002+HG003+HG004	NovaSeq	10	FALSE	FreeBayes	notinalllowmapandsegdup	Aaaaaa	aaaaaa	54235
HG002+HG003+HG004	NovaSeq	10	FALSE	FreeBayes	notinalllowmapandsegdup	aaaaaa	AAAAaa	3
HG002+HG003+HG004	NovaSeq	10	FALSE	FreeBayes	notinalllowmapandsegdup	aaaaaa	AAAaaa	10
HG002+HG003+HG004	NovaSeq	10	FALSE	FreeBayes	notinalllowmapandsegdup	aaaaaa	AAaaaa	148
HG002+HG003+HG004	NovaSeq	10	FALSE	FreeBayes	notinalllowmapandsegdup	aaaaaa	Aaaaaa	5847
HG002+HG003+HG004	NovaSeq	10	FALSE	GATK4	AllTandemRepeatsandHomopolymers	AAAAAa	AAAAaa	17406
HG002+HG003+HG004	NovaSeq	10	FALSE	GATK4	AllTandemRepeatsandHomopolymers	AAAAAa	AAAaaa	3173
HG002+HG003+HG004	NovaSeq	10	FALSE	GATK4	AllTandemRepeatsandHomopolymers	AAAAAa	AAaaaa	412
HG002+HG003+HG004	NovaSeq	10	FALSE	GATK4	AllTandemRepeatsandHomopolymers	AAAAAa	Aaaaaa	53
HG002+HG003+HG004	NovaSeq	10	FALSE	GATK4	AllTandemRepeatsandHomopolymers	AAAAAa	aaaaaa	48
HG002+HG003+HG004	NovaSeq	10	FALSE	GATK4	AllTandemRepeatsandHomopolymers	AAAAaa	AAAAAa	21930
HG002+HG003+HG004	NovaSeq	10	FALSE	GATK4	AllTandemRepeatsandHomopolymers	AAAAaa	AAAaaa	24102
HG002+HG003+HG004	NovaSeq	10	FALSE	GATK4	AllTandemRepeatsandHomopolymers	AAAAaa	AAaaaa	5540
HG002+HG003+HG004	NovaSeq	10	FALSE	GATK4	AllTandemRepeatsandHomopolymers	AAAAaa	Aaaaaa	859
HG002+HG003+HG004	NovaSeq	10	FALSE	GATK4	AllTandemRepeatsandHomopolymers	AAAAaa	aaaaaa	308
HG002+HG003+HG004	NovaSeq	10	FALSE	GATK4	AllTandemRepeatsandHomopolymers	AAAaaa	AAAAAa	3703
HG002+HG003+HG004	NovaSeq	10	FALSE	GATK4	AllTandemRepeatsandHomopolymers	AAAaaa	AAAAaa	18235
HG002+HG003+HG004	NovaSeq	10	FALSE	GATK4	AllTandemRepeatsandHomopolymers	AAAaaa	AAaaaa	14830
HG002+HG003+HG004	NovaSeq	10	FALSE	GATK4	AllTandemRepeatsandHomopolymers	AAAaaa	Aaaaaa	4141
HG002+HG003+HG004	NovaSeq	10	FALSE	GATK4	AllTandemRepeatsandHomopolymers	AAAaaa	aaaaaa	864
HG002+HG003+HG004	NovaSeq	10	FALSE	GATK4	AllTandemRepeatsandHomopolymers	AAaaaa	AAAAAa	386
HG002+HG003+HG004	NovaSeq	10	FALSE	GATK4	AllTandemRepeatsandHomopolymers	AAaaaa	AAAAaa	3798
HG002+HG003+HG004	NovaSeq	10	FALSE	GATK4	AllTandemRepeatsandHomopolymers	AAaaaa	AAAaaa	14109
HG002+HG003+HG004	NovaSeq	10	FALSE	GATK4	AllTandemRepeatsandHomopolymers	AAaaaa	Aaaaaa	13103
HG002+HG003+HG004	NovaSeq	10	FALSE	GATK4	AllTandemRepeatsandHomopolymers	AAaaaa	aaaaaa	2704
HG002+HG003+HG004	NovaSeq	10	FALSE	GATK4	AllTandemRepeatsandHomopolymers	Aaaaaa	AAAAAa	18
HG002+HG003+HG004	NovaSeq	10	FALSE	GATK4	AllTandemRepeatsandHomopolymers	Aaaaaa	AAAAaa	262
HG002+HG003+HG004	NovaSeq	10	FALSE	GATK4	AllTandemRepeatsandHomopolymers	Aaaaaa	AAAaaa	2039
HG002+HG003+HG004	NovaSeq	10	FALSE	GATK4	AllTandemRepeatsandHomopolymers	Aaaaaa	AAaaaa	8176
HG002+HG003+HG004	NovaSeq	10	FALSE	GATK4	AllTandemRepeatsandHomopolymers	Aaaaaa	aaaaaa	8576
HG002+HG003+HG004	NovaSeq	10	FALSE	GATK4	AllTandemRepeatsandHomopolymers	aaaaaa	AAAAaa	7
HG002+HG003+HG004	NovaSeq	10	FALSE	GATK4	AllTandemRepeatsandHomopolymers	aaaaaa	AAAaaa	27
HG002+HG003+HG004	NovaSeq	10	FALSE	GATK4	AllTandemRepeatsandHomopolymers	aaaaaa	AAaaaa	132
HG002+HG003+HG004	NovaSeq	10	FALSE	GATK4	AllTandemRepeatsandHomopolymers	aaaaaa	Aaaaaa	1533
HG002+HG003+HG004	NovaSeq	10	FALSE	GATK4	alldifficult	AAAAAa	AAAAaa	38337
HG002+HG003+HG004	NovaSeq	10	FALSE	GATK4	alldifficult	AAAAAa	AAAaaa	6346
HG002+HG003+HG004	NovaSeq	10	FALSE	GATK4	alldifficult	AAAAAa	AAaaaa	797
HG002+HG003+HG004	NovaSeq	10	FALSE	GATK4	alldifficult	AAAAAa	Aaaaaa	88
HG002+HG003+HG004	NovaSeq	10	FALSE	GATK4	alldifficult	AAAAAa	aaaaaa	92
HG002+HG003+HG004	NovaSeq	10	FALSE	GATK4	alldifficult	AAAAaa	AAAAAa	52086
HG002+HG003+HG004	NovaSeq	10	FALSE	GATK4	alldifficult	AAAAaa	AAAaaa	52055
HG002+HG003+HG004	NovaSeq	10	FALSE	GATK4	alldifficult	AAAAaa	AAaaaa	11135
HG002+HG003+HG004	NovaSeq	10	FALSE	GATK4	alldifficult	AAAAaa	Aaaaaa	1599
HG002+HG003+HG004	NovaSeq	10	FALSE	GATK4	alldifficult	AAAAaa	aaaaaa	552
HG002+HG003+HG004	NovaSeq	10	FALSE	GATK4	alldifficult	AAAaaa	AAAAAa	8917
HG002+HG003+HG004	NovaSeq	10	FALSE	GATK4	alldifficult	AAAaaa	AAAAaa	42087
HG002+HG003+HG004	NovaSeq	10	FALSE	GATK4	alldifficult	AAAaaa	AAaaaa	31503
HG002+HG003+HG004	NovaSeq	10	FALSE	GATK4	alldifficult	AAAaaa	Aaaaaa	8221
HG002+HG003+HG004	NovaSeq	10	FALSE	GATK4	alldifficult	AAAaaa	aaaaaa	1595
HG002+HG003+HG004	NovaSeq	10	FALSE	GATK4	alldifficult	AAaaaa	AAAAAa	1117
HG002+HG003+HG004	NovaSeq	10	FALSE	GATK4	alldifficult	AAaaaa	AAAAaa	9269
HG002+HG003+HG004	NovaSeq	10	FALSE	GATK4	alldifficult	AAaaaa	AAAaaa	32207
HG002+HG003+HG004	NovaSeq	10	FALSE	GATK4	alldifficult	AAaaaa	Aaaaaa	28154
HG002+HG003+HG004	NovaSeq	10	FALSE	GATK4	alldifficult	AAaaaa	aaaaaa	5193
HG002+HG003+HG004	NovaSeq	10	FALSE	GATK4	alldifficult	Aaaaaa	AAAAAa	82
HG002+HG003+HG004	NovaSeq	10	FALSE	GATK4	alldifficult	Aaaaaa	AAAAaa	814
HG002+HG003+HG004	NovaSeq	10	FALSE	GATK4	alldifficult	Aaaaaa	AAAaaa	5061
HG002+HG003+HG004	NovaSeq	10	FALSE	GATK4	alldifficult	Aaaaaa	AAaaaa	19260
HG002+HG003+HG004	NovaSeq	10	FALSE	GATK4	alldifficult	Aaaaaa	aaaaaa	17603
HG002+HG003+HG004	NovaSeq	10	FALSE	GATK4	alldifficult	aaaaaa	AAAAAa	9
HG002+HG003+HG004	NovaSeq	10	FALSE	GATK4	alldifficult	aaaaaa	AAAAaa	34
HG002+HG003+HG004	NovaSeq	10	FALSE	GATK4	alldifficult	aaaaaa	AAAaaa	120
HG002+HG003+HG004	NovaSeq	10	FALSE	GATK4	alldifficult	aaaaaa	AAaaaa	401
HG002+HG003+HG004	NovaSeq	10	FALSE	GATK4	alldifficult	aaaaaa	Aaaaaa	2752
HG002+HG003+HG004	NovaSeq	10	FALSE	GATK4	alllowmapandsegdup	AAAAAa	AAAAaa	11160
HG002+HG003+HG004	NovaSeq	10	FALSE	GATK4	alllowmapandsegdup	AAAAAa	AAAaaa	1734
HG002+HG003+HG004	NovaSeq	10	FALSE	GATK4	alllowmapandsegdup	AAAAAa	AAaaaa	235
HG002+HG003+HG004	NovaSeq	10	FALSE	GATK4	alllowmapandsegdup	AAAAAa	Aaaaaa	21
HG002+HG003+HG004	NovaSeq	10	FALSE	GATK4	alllowmapandsegdup	AAAAAa	aaaaaa	31
HG002+HG003+HG004	NovaSeq	10	FALSE	GATK4	alllowmapandsegdup	AAAAaa	AAAAAa	15397
HG002+HG003+HG004	NovaSeq	10	FALSE	GATK4	alllowmapandsegdup	AAAAaa	AAAaaa	13692
HG002+HG003+HG004	NovaSeq	10	FALSE	GATK4	alllowmapandsegdup	AAAAaa	AAaaaa	2875
HG002+HG003+HG004	NovaSeq	10	FALSE	GATK4	alllowmapandsegdup	AAAAaa	Aaaaaa	389
HG002+HG003+HG004	NovaSeq	10	FALSE	GATK4	alllowmapandsegdup	AAAAaa	aaaaaa	167
HG002+HG003+HG004	NovaSeq	10	FALSE	GATK4	alllowmapandsegdup	AAAaaa	AAAAAa	3177
HG002+HG003+HG004	NovaSeq	10	FALSE	GATK4	alllowmapandsegdup	AAAaaa	AAAAaa	13064
HG002+HG003+HG004	NovaSeq	10	FALSE	GATK4	alllowmapandsegdup	AAAaaa	AAaaaa	8239
HG002+HG003+HG004	NovaSeq	10	FALSE	GATK4	alllowmapandsegdup	AAAaaa	Aaaaaa	2077
HG002+HG003+HG004	NovaSeq	10	FALSE	GATK4	alllowmapandsegdup	AAAaaa	aaaaaa	456
HG002+HG003+HG004	NovaSeq	10	FALSE	GATK4	alllowmapandsegdup	AAaaaa	AAAAAa	455
HG002+HG003+HG004	NovaSeq	10	FALSE	GATK4	alllowmapandsegdup	AAaaaa	AAAAaa	3340
HG002+HG003+HG004	NovaSeq	10	FALSE	GATK4	alllowmapandsegdup	AAaaaa	AAAaaa	9734
HG002+HG003+HG004	NovaSeq	10	FALSE	GATK4	alllowmapandsegdup	AAaaaa	Aaaaaa	7331
HG002+HG003+HG004	NovaSeq	10	FALSE	GATK4	alllowmapandsegdup	AAaaaa	aaaaaa	1402
HG002+HG003+HG004	NovaSeq	10	FALSE	GATK4	alllowmapandsegdup	Aaaaaa	AAAAAa	52
HG002+HG003+HG004	NovaSeq	10	FALSE	GATK4	alllowmapandsegdup	Aaaaaa	AAAAaa	431
HG002+HG003+HG004	NovaSeq	10	FALSE	GATK4	alllowmapandsegdup	Aaaaaa	AAAaaa	2003
HG002+HG003+HG004	NovaSeq	10	FALSE	GATK4	alllowmapandsegdup	Aaaaaa	AAaaaa	6275
HG002+HG003+HG004	NovaSeq	10	FALSE	GATK4	alllowmapandsegdup	Aaaaaa	aaaaaa	5189
HG002+HG003+HG004	NovaSeq	10	FALSE	GATK4	alllowmapandsegdup	aaaaaa	AAAAAa	9
HG002+HG003+HG004	NovaSeq	10	FALSE	GATK4	alllowmapandsegdup	aaaaaa	AAAAaa	29
HG002+HG003+HG004	NovaSeq	10	FALSE	GATK4	alllowmapandsegdup	aaaaaa	AAAaaa	94
HG002+HG003+HG004	NovaSeq	10	FALSE	GATK4	alllowmapandsegdup	aaaaaa	AAaaaa	266
HG002+HG003+HG004	NovaSeq	10	FALSE	GATK4	alllowmapandsegdup	aaaaaa	Aaaaaa	912
HG002+HG003+HG004	NovaSeq	10	FALSE	GATK4	genome	AAAAAa	AAAAaa	179255
HG002+HG003+HG004	NovaSeq	10	FALSE	GATK4	genome	AAAAAa	AAAaaa	27368
HG002+HG003+HG004	NovaSeq	10	FALSE	GATK4	genome	AAAAAa	AAaaaa	2804
HG002+HG003+HG004	NovaSeq	10	FALSE	GATK4	genome	AAAAAa	Aaaaaa	249
HG002+HG003+HG004	NovaSeq	10	FALSE	GATK4	genome	AAAAAa	aaaaaa	196
HG002+HG003+HG004	NovaSeq	10	FALSE	GATK4	genome	AAAAaa	AAAAAa	256938
HG002+HG003+HG004	NovaSeq	10	FALSE	GATK4	genome	AAAAaa	AAAaaa	254757
HG002+HG003+HG004	NovaSeq	10	FALSE	GATK4	genome	AAAAaa	AAaaaa	49632
HG002+HG003+HG004	NovaSeq	10	FALSE	GATK4	genome	AAAAaa	Aaaaaa	6634
HG002+HG003+HG004	NovaSeq	10	FALSE	GATK4	genome	AAAAaa	aaaaaa	1549
HG002+HG003+HG004	NovaSeq	10	FALSE	GATK4	genome	AAAaaa	AAAAAa	39200
HG002+HG003+HG004	NovaSeq	10	FALSE	GATK4	genome	AAAaaa	AAAAaa	195682
HG002+HG003+HG004	NovaSeq	10	FALSE	GATK4	genome	AAAaaa	AAaaaa	155256
HG002+HG003+HG004	NovaSeq	10	FALSE	GATK4	genome	AAAaaa	Aaaaaa	38418
HG002+HG003+HG004	NovaSeq	10	FALSE	GATK4	genome	AAAaaa	aaaaaa	5099
HG002+HG003+HG004	NovaSeq	10	FALSE	GATK4	genome	AAaaaa	AAAAAa	3669
HG002+HG003+HG004	NovaSeq	10	FALSE	GATK4	genome	AAaaaa	AAAAaa	37992
HG002+HG003+HG004	NovaSeq	10	FALSE	GATK4	genome	AAaaaa	AAAaaa	152540
HG002+HG003+HG004	NovaSeq	10	FALSE	GATK4	genome	AAaaaa	Aaaaaa	142915
HG002+HG003+HG004	NovaSeq	10	FALSE	GATK4	genome	AAaaaa	aaaaaa	20420
HG002+HG003+HG004	NovaSeq	10	FALSE	GATK4	genome	Aaaaaa	AAAAAa	141
HG002+HG003+HG004	NovaSeq	10	FALSE	GATK4	genome	Aaaaaa	AAAAaa	2291
HG002+HG003+HG004	NovaSeq	10	FALSE	GATK4	genome	Aaaaaa	AAAaaa	18989
HG002+HG003+HG004	NovaSeq	10	FALSE	GATK4	genome	Aaaaaa	AAaaaa	86851
HG002+HG003+HG004	NovaSeq	10	FALSE	GATK4	genome	Aaaaaa	aaaaaa	74348
HG002+HG003+HG004	NovaSeq	10	FALSE	GATK4	genome	aaaaaa	AAAAAa	10
HG002+HG003+HG004	NovaSeq	10	FALSE	GATK4	genome	aaaaaa	AAAAaa	35
HG002+HG003+HG004	NovaSeq	10	FALSE	GATK4	genome	aaaaaa	AAAaaa	127
HG002+HG003+HG004	NovaSeq	10	FALSE	GATK4	genome	aaaaaa	AAaaaa	503
HG002+HG003+HG004	NovaSeq	10	FALSE	GATK4	genome	aaaaaa	Aaaaaa	7414
HG002+HG003+HG004	NovaSeq	10	FALSE	GATK4	notinAllTandemRepeatsandHomopolymers	AAAAAa	AAAAaa	161879
HG002+HG003+HG004	NovaSeq	10	FALSE	GATK4	notinAllTandemRepeatsandHomopolymers	AAAAAa	AAAaaa	24198
HG002+HG003+HG004	NovaSeq	10	FALSE	GATK4	notinAllTandemRepeatsandHomopolymers	AAAAAa	AAaaaa	2393
HG002+HG003+HG004	NovaSeq	10	FALSE	GATK4	notinAllTandemRepeatsandHomopolymers	AAAAAa	Aaaaaa	196
HG002+HG003+HG004	NovaSeq	10	FALSE	GATK4	notinAllTandemRepeatsandHomopolymers	AAAAAa	aaaaaa	148
HG002+HG003+HG004	NovaSeq	10	FALSE	GATK4	notinAllTandemRepeatsandHomopolymers	AAAAaa	AAAAAa	235067
HG002+HG003+HG004	NovaSeq	10	FALSE	GATK4	notinAllTandemRepeatsandHomopolymers	AAAAaa	AAAaaa	230690
HG002+HG003+HG004	NovaSeq	10	FALSE	GATK4	notinAllTandemRepeatsandHomopolymers	AAAAaa	AAaaaa	44106
HG002+HG003+HG004	NovaSeq	10	FALSE	GATK4	notinAllTandemRepeatsandHomopolymers	AAAAaa	Aaaaaa	5778
HG002+HG003+HG004	NovaSeq	10	FALSE	GATK4	notinAllTandemRepeatsandHomopolymers	AAAAaa	aaaaaa	1243
HG002+HG003+HG004	NovaSeq	10	FALSE	GATK4	notinAllTandemRepeatsandHomopolymers	AAAaaa	AAAAAa	35495
HG002+HG003+HG004	NovaSeq	10	FALSE	GATK4	notinAllTandemRepeatsandHomopolymers	AAAaaa	AAAAaa	177481
HG002+HG003+HG004	NovaSeq	10	FALSE	GATK4	notinAllTandemRepeatsandHomopolymers	AAAaaa	AAaaaa	140448
HG002+HG003+HG004	NovaSeq	10	FALSE	GATK4	notinAllTandemRepeatsandHomopolymers	AAAaaa	Aaaaaa	34278
HG002+HG003+HG004	NovaSeq	10	FALSE	GATK4	notinAllTandemRepeatsandHomopolymers	AAAaaa	aaaaaa	4234
HG002+HG003+HG004	NovaSeq	10	FALSE	GATK4	notinAllTandemRepeatsandHomopolymers	AAaaaa	AAAAAa	3282
HG002+HG003+HG004	NovaSeq	10	FALSE	GATK4	notinAllTandemRepeatsandHomopolymers	AAaaaa	AAAAaa	34198
HG002+HG003+HG004	NovaSeq	10	FALSE	GATK4	notinAllTandemRepeatsandHomopolymers	AAaaaa	AAAaaa	138441
HG002+HG003+HG004	NovaSeq	10	FALSE	GATK4	notinAllTandemRepeatsandHomopolymers	AAaaaa	Aaaaaa	129820
HG002+HG003+HG004	NovaSeq	10	FALSE	GATK4	notinAllTandemRepeatsandHomopolymers	AAaaaa	aaaaaa	17716
HG002+HG003+HG004	NovaSeq	10	FALSE	GATK4	notinAllTandemRepeatsandHomopolymers	Aaaaaa	AAAAAa	123
HG002+HG003+HG004	NovaSeq	10	FALSE	GATK4	notinAllTandemRepeatsandHomopolymers	Aaaaaa	AAAAaa	2029
HG002+HG003+HG004	NovaSeq	10	FALSE	GATK4	notinAllTandemRepeatsandHomopolymers	Aaaaaa	AAAaaa	16953
HG002+HG003+HG004	NovaSeq	10	FALSE	GATK4	notinAllTandemRepeatsandHomopolymers	Aaaaaa	AAaaaa	78680
HG002+HG003+HG004	NovaSeq	10	FALSE	GATK4	notinAllTandemRepeatsandHomopolymers	Aaaaaa	aaaaaa	65774
HG002+HG003+HG004	NovaSeq	10	FALSE	GATK4	notinAllTandemRepeatsandHomopolymers	aaaaaa	AAAAAa	10
HG002+HG003+HG004	NovaSeq	10	FALSE	GATK4	notinAllTandemRepeatsandHomopolymers	aaaaaa	AAAAaa	28
HG002+HG003+HG004	NovaSeq	10	FALSE	GATK4	notinAllTandemRepeatsandHomopolymers	aaaaaa	AAAaaa	100
HG002+HG003+HG004	NovaSeq	10	FALSE	GATK4	notinAllTandemRepeatsandHomopolymers	aaaaaa	AAaaaa	371
HG002+HG003+HG004	NovaSeq	10	FALSE	GATK4	notinAllTandemRepeatsandHomopolymers	aaaaaa	Aaaaaa	5883
HG002+HG003+HG004	NovaSeq	10	FALSE	GATK4	notinalldifficult	AAAAAa	AAAAaa	140939
HG002+HG003+HG004	NovaSeq	10	FALSE	GATK4	notinalldifficult	AAAAAa	AAAaaa	21027
HG002+HG003+HG004	NovaSeq	10	FALSE	GATK4	notinalldifficult	AAAAAa	AAaaaa	2008
HG002+HG003+HG004	NovaSeq	10	FALSE	GATK4	notinalldifficult	AAAAAa	Aaaaaa	161
HG002+HG003+HG004	NovaSeq	10	FALSE	GATK4	notinalldifficult	AAAAAa	aaaaaa	104
HG002+HG003+HG004	NovaSeq	10	FALSE	GATK4	notinalldifficult	AAAAaa	AAAAAa	204895
HG002+HG003+HG004	NovaSeq	10	FALSE	GATK4	notinalldifficult	AAAAaa	AAAaaa	202733
HG002+HG003+HG004	NovaSeq	10	FALSE	GATK4	notinalldifficult	AAAAaa	AAaaaa	38508
HG002+HG003+HG004	NovaSeq	10	FALSE	GATK4	notinalldifficult	AAAAaa	Aaaaaa	5036
HG002+HG003+HG004	NovaSeq	10	FALSE	GATK4	notinalldifficult	AAAAaa	aaaaaa	999
HG002+HG003+HG004	NovaSeq	10	FALSE	GATK4	notinalldifficult	AAAaaa	AAAAAa	30283
HG002+HG003+HG004	NovaSeq	10	FALSE	GATK4	notinalldifficult	AAAaaa	AAAAaa	153620
HG002+HG003+HG004	NovaSeq	10	FALSE	GATK4	notinalldifficult	AAAaaa	AAaaaa	123764
HG002+HG003+HG004	NovaSeq	10	FALSE	GATK4	notinalldifficult	AAAaaa	Aaaaaa	30200
HG002+HG003+HG004	NovaSeq	10	FALSE	GATK4	notinalldifficult	AAAaaa	aaaaaa	3503
HG002+HG003+HG004	NovaSeq	10	FALSE	GATK4	notinalldifficult	AAaaaa	AAAAAa	2551
HG002+HG003+HG004	NovaSeq	10	FALSE	GATK4	notinalldifficult	AAaaaa	AAAAaa	28722
HG002+HG003+HG004	NovaSeq	10	FALSE	GATK4	notinalldifficult	AAaaaa	AAAaaa	120341
HG002+HG003+HG004	NovaSeq	10	FALSE	GATK4	notinalldifficult	AAaaaa	Aaaaaa	114766
HG002+HG003+HG004	NovaSeq	10	FALSE	GATK4	notinalldifficult	AAaaaa	aaaaaa	15226
HG002+HG003+HG004	NovaSeq	10	FALSE	GATK4	notinalldifficult	Aaaaaa	AAAAAa	59
HG002+HG003+HG004	NovaSeq	10	FALSE	GATK4	notinalldifficult	Aaaaaa	AAAAaa	1477
HG002+HG003+HG004	NovaSeq	10	FALSE	GATK4	notinalldifficult	Aaaaaa	AAAaaa	13932
HG002+HG003+HG004	NovaSeq	10	FALSE	GATK4	notinalldifficult	Aaaaaa	AAaaaa	67592
HG002+HG003+HG004	NovaSeq	10	FALSE	GATK4	notinalldifficult	Aaaaaa	aaaaaa	56741
HG002+HG003+HG004	NovaSeq	10	FALSE	GATK4	notinalldifficult	aaaaaa	AAAAAa	1
HG002+HG003+HG004	NovaSeq	10	FALSE	GATK4	notinalldifficult	aaaaaa	AAAAaa	1
HG002+HG003+HG004	NovaSeq	10	FALSE	GATK4	notinalldifficult	aaaaaa	AAAaaa	7
HG002+HG003+HG004	NovaSeq	10	FALSE	GATK4	notinalldifficult	aaaaaa	AAaaaa	102
HG002+HG003+HG004	NovaSeq	10	FALSE	GATK4	notinalldifficult	aaaaaa	Aaaaaa	4665
HG002+HG003+HG004	NovaSeq	10	FALSE	GATK4	notinalllowmapandsegdup	AAAAAa	AAAAaa	168095
HG002+HG003+HG004	NovaSeq	10	FALSE	GATK4	notinalllowmapandsegdup	AAAAAa	AAAaaa	25634
HG002+HG003+HG004	NovaSeq	10	FALSE	GATK4	notinalllowmapandsegdup	AAAAAa	AAaaaa	2569
HG002+HG003+HG004	NovaSeq	10	FALSE	GATK4	notinalllowmapandsegdup	AAAAAa	Aaaaaa	228
HG002+HG003+HG004	NovaSeq	10	FALSE	GATK4	notinalllowmapandsegdup	AAAAAa	aaaaaa	165
HG002+HG003+HG004	NovaSeq	10	FALSE	GATK4	notinalllowmapandsegdup	AAAAaa	AAAAAa	241535
HG002+HG003+HG004	NovaSeq	10	FALSE	GATK4	notinalllowmapandsegdup	AAAAaa	AAAaaa	241065
HG002+HG003+HG004	NovaSeq	10	FALSE	GATK4	notinalllowmapandsegdup	AAAAaa	AAaaaa	46755
HG002+HG003+HG004	NovaSeq	10	FALSE	GATK4	notinalllowmapandsegdup	AAAAaa	Aaaaaa	6245
HG002+HG003+HG004	NovaSeq	10	FALSE	GATK4	notinalllowmapandsegdup	AAAAaa	aaaaaa	1382
HG002+HG003+HG004	NovaSeq	10	FALSE	GATK4	notinalllowmapandsegdup	AAAaaa	AAAAAa	36023
HG002+HG003+HG004	NovaSeq	10	FALSE	GATK4	notinalllowmapandsegdup	AAAaaa	AAAAaa	182602
HG002+HG003+HG004	NovaSeq	10	FALSE	GATK4	notinalllowmapandsegdup	AAAaaa	AAaaaa	147010
HG002+HG003+HG004	NovaSeq	10	FALSE	GATK4	notinalllowmapandsegdup	AAAaaa	Aaaaaa	36341
HG002+HG003+HG004	NovaSeq	10	FALSE	GATK4	notinalllowmapandsegdup	AAAaaa	aaaaaa	4643
HG002+HG003+HG004	NovaSeq	10	FALSE	GATK4	notinalllowmapandsegdup	AAaaaa	AAAAAa	3213
HG002+HG003+HG004	NovaSeq	10	FALSE	GATK4	notinalllowmapandsegdup	AAaaaa	AAAAaa	34647
HG002+HG003+HG004	NovaSeq	10	FALSE	GATK4	notinalllowmapandsegdup	AAaaaa	AAAaaa	142802
HG002+HG003+HG004	NovaSeq	10	FALSE	GATK4	notinalllowmapandsegdup	AAaaaa	Aaaaaa	135581
HG002+HG003+HG004	NovaSeq	10	FALSE	GATK4	notinalllowmapandsegdup	AAaaaa	aaaaaa	19017
HG002+HG003+HG004	NovaSeq	10	FALSE	GATK4	notinalllowmapandsegdup	Aaaaaa	AAAAAa	89
HG002+HG003+HG004	NovaSeq	10	FALSE	GATK4	notinalllowmapandsegdup	Aaaaaa	AAAAaa	1860
HG002+HG003+HG004	NovaSeq	10	FALSE	GATK4	notinalllowmapandsegdup	Aaaaaa	AAAaaa	16988
HG002+HG003+HG004	NovaSeq	10	FALSE	GATK4	notinalllowmapandsegdup	Aaaaaa	AAaaaa	80572
HG002+HG003+HG004	NovaSeq	10	FALSE	GATK4	notinalllowmapandsegdup	Aaaaaa	aaaaaa	69154
HG002+HG003+HG004	NovaSeq	10	FALSE	GATK4	notinalllowmapandsegdup	aaaaaa	AAAAAa	1
HG002+HG003+HG004	NovaSeq	10	FALSE	GATK4	notinalllowmapandsegdup	aaaaaa	AAAAaa	6
HG002+HG003+HG004	NovaSeq	10	FALSE	GATK4	notinalllowmapandsegdup	aaaaaa	AAAaaa	33
HG002+HG003+HG004	NovaSeq	10	FALSE	GATK4	notinalllowmapandsegdup	aaaaaa	AAaaaa	237
HG002+HG003+HG004	NovaSeq	10	FALSE	GATK4	notinalllowmapandsegdup	aaaaaa	Aaaaaa	6503
HG002+HG003+HG004	NovaSeq	10	FALSE	Octopus	AllTandemRepeatsandHomopolymers	AAAAAa	AAAAaa	19740
HG002+HG003+HG004	NovaSeq	10	FALSE	Octopus	AllTandemRepeatsandHomopolymers	AAAAAa	AAAaaa	3060
HG002+HG003+HG004	NovaSeq	10	FALSE	Octopus	AllTandemRepeatsandHomopolymers	AAAAAa	AAaaaa	412
HG002+HG003+HG004	NovaSeq	10	FALSE	Octopus	AllTandemRepeatsandHomopolymers	AAAAAa	Aaaaaa	43
HG002+HG003+HG004	NovaSeq	10	FALSE	Octopus	AllTandemRepeatsandHomopolymers	AAAAAa	aaaaaa	58
HG002+HG003+HG004	NovaSeq	10	FALSE	Octopus	AllTandemRepeatsandHomopolymers	AAAAaa	AAAAAa	11687
HG002+HG003+HG004	NovaSeq	10	FALSE	Octopus	AllTandemRepeatsandHomopolymers	AAAAaa	AAAaaa	25508
HG002+HG003+HG004	NovaSeq	10	FALSE	Octopus	AllTandemRepeatsandHomopolymers	AAAAaa	AAaaaa	5222
HG002+HG003+HG004	NovaSeq	10	FALSE	Octopus	AllTandemRepeatsandHomopolymers	AAAAaa	Aaaaaa	564
HG002+HG003+HG004	NovaSeq	10	FALSE	Octopus	AllTandemRepeatsandHomopolymers	AAAAaa	aaaaaa	298
HG002+HG003+HG004	NovaSeq	10	FALSE	Octopus	AllTandemRepeatsandHomopolymers	AAAaaa	AAAAAa	1482
HG002+HG003+HG004	NovaSeq	10	FALSE	Octopus	AllTandemRepeatsandHomopolymers	AAAaaa	AAAAaa	14880
HG002+HG003+HG004	NovaSeq	10	FALSE	Octopus	AllTandemRepeatsandHomopolymers	AAAaaa	AAaaaa	16459
HG002+HG003+HG004	NovaSeq	10	FALSE	Octopus	AllTandemRepeatsandHomopolymers	AAAaaa	Aaaaaa	2799
HG002+HG003+HG004	NovaSeq	10	FALSE	Octopus	AllTandemRepeatsandHomopolymers	AAAaaa	aaaaaa	789
HG002+HG003+HG004	NovaSeq	10	FALSE	Octopus	AllTandemRepeatsandHomopolymers	AAaaaa	AAAAAa	147
HG002+HG003+HG004	NovaSeq	10	FALSE	Octopus	AllTandemRepeatsandHomopolymers	AAaaaa	AAAAaa	2062
HG002+HG003+HG004	NovaSeq	10	FALSE	Octopus	AllTandemRepeatsandHomopolymers	AAaaaa	AAAaaa	11771
HG002+HG003+HG004	NovaSeq	10	FALSE	Octopus	AllTandemRepeatsandHomopolymers	AAaaaa	Aaaaaa	11198
HG002+HG003+HG004	NovaSeq	10	FALSE	Octopus	AllTandemRepeatsandHomopolymers	AAaaaa	aaaaaa	2444
HG002+HG003+HG004	NovaSeq	10	FALSE	Octopus	AllTandemRepeatsandHomopolymers	Aaaaaa	AAAAAa	14
HG002+HG003+HG004	NovaSeq	10	FALSE	Octopus	AllTandemRepeatsandHomopolymers	Aaaaaa	AAAAaa	111
HG002+HG003+HG004	NovaSeq	10	FALSE	Octopus	AllTandemRepeatsandHomopolymers	Aaaaaa	AAAaaa	1066
HG002+HG003+HG004	NovaSeq	10	FALSE	Octopus	AllTandemRepeatsandHomopolymers	Aaaaaa	AAaaaa	7946
HG002+HG003+HG004	NovaSeq	10	FALSE	Octopus	AllTandemRepeatsandHomopolymers	Aaaaaa	aaaaaa	8089
HG002+HG003+HG004	NovaSeq	10	FALSE	Octopus	AllTandemRepeatsandHomopolymers	aaaaaa	AAAAAa	1
HG002+HG003+HG004	NovaSeq	10	FALSE	Octopus	AllTandemRepeatsandHomopolymers	aaaaaa	AAAAaa	2
HG002+HG003+HG004	NovaSeq	10	FALSE	Octopus	AllTandemRepeatsandHomopolymers	aaaaaa	AAAaaa	9
HG002+HG003+HG004	NovaSeq	10	FALSE	Octopus	AllTandemRepeatsandHomopolymers	aaaaaa	AAaaaa	85
HG002+HG003+HG004	NovaSeq	10	FALSE	Octopus	AllTandemRepeatsandHomopolymers	aaaaaa	Aaaaaa	1502
HG002+HG003+HG004	NovaSeq	10	FALSE	Octopus	alldifficult	AAAAAa	AAAAaa	43598
HG002+HG003+HG004	NovaSeq	10	FALSE	Octopus	alldifficult	AAAAAa	AAAaaa	6164
HG002+HG003+HG004	NovaSeq	10	FALSE	Octopus	alldifficult	AAAAAa	AAaaaa	750
HG002+HG003+HG004	NovaSeq	10	FALSE	Octopus	alldifficult	AAAAAa	Aaaaaa	63
HG002+HG003+HG004	NovaSeq	10	FALSE	Octopus	alldifficult	AAAAAa	aaaaaa	156
HG002+HG003+HG004	NovaSeq	10	FALSE	Octopus	alldifficult	AAAAaa	AAAAAa	23057
HG002+HG003+HG004	NovaSeq	10	FALSE	Octopus	alldifficult	AAAAaa	AAAaaa	55749
HG002+HG003+HG004	NovaSeq	10	FALSE	Octopus	alldifficult	AAAAaa	AAaaaa	10396
HG002+HG003+HG004	NovaSeq	10	FALSE	Octopus	alldifficult	AAAAaa	Aaaaaa	985
HG002+HG003+HG004	NovaSeq	10	FALSE	Octopus	alldifficult	AAAAaa	aaaaaa	606
HG002+HG003+HG004	NovaSeq	10	FALSE	Octopus	alldifficult	AAAaaa	AAAAAa	2948
HG002+HG003+HG004	NovaSeq	10	FALSE	Octopus	alldifficult	AAAaaa	AAAAaa	34921
HG002+HG003+HG004	NovaSeq	10	FALSE	Octopus	alldifficult	AAAaaa	AAaaaa	35060
HG002+HG003+HG004	NovaSeq	10	FALSE	Octopus	alldifficult	AAAaaa	Aaaaaa	5431
HG002+HG003+HG004	NovaSeq	10	FALSE	Octopus	alldifficult	AAAaaa	aaaaaa	1518
HG002+HG003+HG004	NovaSeq	10	FALSE	Octopus	alldifficult	AAaaaa	AAAAAa	378
HG002+HG003+HG004	NovaSeq	10	FALSE	Octopus	alldifficult	AAaaaa	AAAAaa	5034
HG002+HG003+HG004	NovaSeq	10	FALSE	Octopus	alldifficult	AAaaaa	AAAaaa	27792
HG002+HG003+HG004	NovaSeq	10	FALSE	Octopus	alldifficult	AAaaaa	Aaaaaa	24262
HG002+HG003+HG004	NovaSeq	10	FALSE	Octopus	alldifficult	AAaaaa	aaaaaa	4965
HG002+HG003+HG004	NovaSeq	10	FALSE	Octopus	alldifficult	Aaaaaa	AAAAAa	58
HG002+HG003+HG004	NovaSeq	10	FALSE	Octopus	alldifficult	Aaaaaa	AAAAaa	404
HG002+HG003+HG004	NovaSeq	10	FALSE	Octopus	alldifficult	Aaaaaa	AAAaaa	2687
HG002+HG003+HG004	NovaSeq	10	FALSE	Octopus	alldifficult	Aaaaaa	AAaaaa	19139
HG002+HG003+HG004	NovaSeq	10	FALSE	Octopus	alldifficult	Aaaaaa	aaaaaa	17223
HG002+HG003+HG004	NovaSeq	10	FALSE	Octopus	alldifficult	aaaaaa	AAAAAa	50
HG002+HG003+HG004	NovaSeq	10	FALSE	Octopus	alldifficult	aaaaaa	AAAAaa	29
HG002+HG003+HG004	NovaSeq	10	FALSE	Octopus	alldifficult	aaaaaa	AAAaaa	110
HG002+HG003+HG004	NovaSeq	10	FALSE	Octopus	alldifficult	aaaaaa	AAaaaa	297
HG002+HG003+HG004	NovaSeq	10	FALSE	Octopus	alldifficult	aaaaaa	Aaaaaa	2629
HG002+HG003+HG004	NovaSeq	10	FALSE	Octopus	alllowmapandsegdup	AAAAAa	AAAAaa	12509
HG002+HG003+HG004	NovaSeq	10	FALSE	Octopus	alllowmapandsegdup	AAAAAa	AAAaaa	1734
HG002+HG003+HG004	NovaSeq	10	FALSE	Octopus	alllowmapandsegdup	AAAAAa	AAaaaa	210
HG002+HG003+HG004	NovaSeq	10	FALSE	Octopus	alllowmapandsegdup	AAAAAa	Aaaaaa	15
HG002+HG003+HG004	NovaSeq	10	FALSE	Octopus	alllowmapandsegdup	AAAAAa	aaaaaa	85
HG002+HG003+HG004	NovaSeq	10	FALSE	Octopus	alllowmapandsegdup	AAAAaa	AAAAAa	5944
HG002+HG003+HG004	NovaSeq	10	FALSE	Octopus	alllowmapandsegdup	AAAAaa	AAAaaa	15144
HG002+HG003+HG004	NovaSeq	10	FALSE	Octopus	alllowmapandsegdup	AAAAaa	AAaaaa	2718
HG002+HG003+HG004	NovaSeq	10	FALSE	Octopus	alllowmapandsegdup	AAAAaa	Aaaaaa	230
HG002+HG003+HG004	NovaSeq	10	FALSE	Octopus	alllowmapandsegdup	AAAAaa	aaaaaa	231
HG002+HG003+HG004	NovaSeq	10	FALSE	Octopus	alllowmapandsegdup	AAAaaa	AAAAAa	977
HG002+HG003+HG004	NovaSeq	10	FALSE	Octopus	alllowmapandsegdup	AAAaaa	AAAAaa	11117
HG002+HG003+HG004	NovaSeq	10	FALSE	Octopus	alllowmapandsegdup	AAAaaa	AAaaaa	9371
HG002+HG003+HG004	NovaSeq	10	FALSE	Octopus	alllowmapandsegdup	AAAaaa	Aaaaaa	1347
HG002+HG003+HG004	NovaSeq	10	FALSE	Octopus	alllowmapandsegdup	AAAaaa	aaaaaa	494
HG002+HG003+HG004	NovaSeq	10	FALSE	Octopus	alllowmapandsegdup	AAaaaa	AAAAAa	180
HG002+HG003+HG004	NovaSeq	10	FALSE	Octopus	alllowmapandsegdup	AAaaaa	AAAAaa	1896
HG002+HG003+HG004	NovaSeq	10	FALSE	Octopus	alllowmapandsegdup	AAaaaa	AAAaaa	8855
HG002+HG003+HG004	NovaSeq	10	FALSE	Octopus	alllowmapandsegdup	AAaaaa	Aaaaaa	6324
HG002+HG003+HG004	NovaSeq	10	FALSE	Octopus	alllowmapandsegdup	AAaaaa	aaaaaa	1493
HG002+HG003+HG004	NovaSeq	10	FALSE	Octopus	alllowmapandsegdup	Aaaaaa	AAAAAa	42
HG002+HG003+HG004	NovaSeq	10	FALSE	Octopus	alllowmapandsegdup	Aaaaaa	AAAAaa	255
HG002+HG003+HG004	NovaSeq	10	FALSE	Octopus	alllowmapandsegdup	Aaaaaa	AAAaaa	1176
HG002+HG003+HG004	NovaSeq	10	FALSE	Octopus	alllowmapandsegdup	Aaaaaa	AAaaaa	6384
HG002+HG003+HG004	NovaSeq	10	FALSE	Octopus	alllowmapandsegdup	Aaaaaa	aaaaaa	5400
HG002+HG003+HG004	NovaSeq	10	FALSE	Octopus	alllowmapandsegdup	aaaaaa	AAAAAa	50
HG002+HG003+HG004	NovaSeq	10	FALSE	Octopus	alllowmapandsegdup	aaaaaa	AAAAaa	29
HG002+HG003+HG004	NovaSeq	10	FALSE	Octopus	alllowmapandsegdup	aaaaaa	AAAaaa	100
HG002+HG003+HG004	NovaSeq	10	FALSE	Octopus	alllowmapandsegdup	aaaaaa	AAaaaa	211
HG002+HG003+HG004	NovaSeq	10	FALSE	Octopus	alllowmapandsegdup	aaaaaa	Aaaaaa	855
HG002+HG003+HG004	NovaSeq	10	FALSE	Octopus	genome	AAAAAa	AAAAaa	208343
HG002+HG003+HG004	NovaSeq	10	FALSE	Octopus	genome	AAAAAa	AAAaaa	25947
HG002+HG003+HG004	NovaSeq	10	FALSE	Octopus	genome	AAAAAa	AAaaaa	2778
HG002+HG003+HG004	NovaSeq	10	FALSE	Octopus	genome	AAAAAa	Aaaaaa	162
HG002+HG003+HG004	NovaSeq	10	FALSE	Octopus	genome	AAAAAa	aaaaaa	278
HG002+HG003+HG004	NovaSeq	10	FALSE	Octopus	genome	AAAAaa	AAAAAa	95181
HG002+HG003+HG004	NovaSeq	10	FALSE	Octopus	genome	AAAAaa	AAAaaa	273412
HG002+HG003+HG004	NovaSeq	10	FALSE	Octopus	genome	AAAAaa	AAaaaa	46126
HG002+HG003+HG004	NovaSeq	10	FALSE	Octopus	genome	AAAAaa	Aaaaaa	3795
HG002+HG003+HG004	NovaSeq	10	FALSE	Octopus	genome	AAAAaa	aaaaaa	1563
HG002+HG003+HG004	NovaSeq	10	FALSE	Octopus	genome	AAAaaa	AAAAAa	9790
HG002+HG003+HG004	NovaSeq	10	FALSE	Octopus	genome	AAAaaa	AAAAaa	162763
HG002+HG003+HG004	NovaSeq	10	FALSE	Octopus	genome	AAAaaa	AAaaaa	171421
HG002+HG003+HG004	NovaSeq	10	FALSE	Octopus	genome	AAAaaa	Aaaaaa	24351
HG002+HG003+HG004	NovaSeq	10	FALSE	Octopus	genome	AAAaaa	aaaaaa	4758
HG002+HG003+HG004	NovaSeq	10	FALSE	Octopus	genome	AAaaaa	AAAAAa	826
HG002+HG003+HG004	NovaSeq	10	FALSE	Octopus	genome	AAaaaa	AAAAaa	20256
HG002+HG003+HG004	NovaSeq	10	FALSE	Octopus	genome	AAaaaa	AAAaaa	131408
HG002+HG003+HG004	NovaSeq	10	FALSE	Octopus	genome	AAaaaa	Aaaaaa	121402
HG002+HG003+HG004	NovaSeq	10	FALSE	Octopus	genome	AAaaaa	aaaaaa	19358
HG002+HG003+HG004	NovaSeq	10	FALSE	Octopus	genome	Aaaaaa	AAAAAa	75
HG002+HG003+HG004	NovaSeq	10	FALSE	Octopus	genome	Aaaaaa	AAAAaa	1001
HG002+HG003+HG004	NovaSeq	10	FALSE	Octopus	genome	Aaaaaa	AAAaaa	9649
HG002+HG003+HG004	NovaSeq	10	FALSE	Octopus	genome	Aaaaaa	AAaaaa	86734
HG002+HG003+HG004	NovaSeq	10	FALSE	Octopus	genome	Aaaaaa	aaaaaa	72407
HG002+HG003+HG004	NovaSeq	10	FALSE	Octopus	genome	aaaaaa	AAAAAa	56
HG002+HG003+HG004	NovaSeq	10	FALSE	Octopus	genome	aaaaaa	AAAAaa	30
HG002+HG003+HG004	NovaSeq	10	FALSE	Octopus	genome	aaaaaa	AAAaaa	113
HG002+HG003+HG004	NovaSeq	10	FALSE	Octopus	genome	aaaaaa	AAaaaa	350
HG002+HG003+HG004	NovaSeq	10	FALSE	Octopus	genome	aaaaaa	Aaaaaa	7228
HG002+HG003+HG004	NovaSeq	10	FALSE	Octopus	notinAllTandemRepeatsandHomopolymers	AAAAAa	AAAAaa	188643
HG002+HG003+HG004	NovaSeq	10	FALSE	Octopus	notinAllTandemRepeatsandHomopolymers	AAAAAa	AAAaaa	22891
HG002+HG003+HG004	NovaSeq	10	FALSE	Octopus	notinAllTandemRepeatsandHomopolymers	AAAAAa	AAaaaa	2368
HG002+HG003+HG004	NovaSeq	10	FALSE	Octopus	notinAllTandemRepeatsandHomopolymers	AAAAAa	Aaaaaa	119
HG002+HG003+HG004	NovaSeq	10	FALSE	Octopus	notinAllTandemRepeatsandHomopolymers	AAAAAa	aaaaaa	220
HG002+HG003+HG004	NovaSeq	10	FALSE	Octopus	notinAllTandemRepeatsandHomopolymers	AAAAaa	AAAAAa	83534
HG002+HG003+HG004	NovaSeq	10	FALSE	Octopus	notinAllTandemRepeatsandHomopolymers	AAAAaa	AAAaaa	247948
HG002+HG003+HG004	NovaSeq	10	FALSE	Octopus	notinAllTandemRepeatsandHomopolymers	AAAAaa	AAaaaa	40916
HG002+HG003+HG004	NovaSeq	10	FALSE	Octopus	notinAllTandemRepeatsandHomopolymers	AAAAaa	Aaaaaa	3233
HG002+HG003+HG004	NovaSeq	10	FALSE	Octopus	notinAllTandemRepeatsandHomopolymers	AAAAaa	aaaaaa	1267
HG002+HG003+HG004	NovaSeq	10	FALSE	Octopus	notinAllTandemRepeatsandHomopolymers	AAAaaa	AAAAAa	8307
HG002+HG003+HG004	NovaSeq	10	FALSE	Octopus	notinAllTandemRepeatsandHomopolymers	AAAaaa	AAAAaa	147914
HG002+HG003+HG004	NovaSeq	10	FALSE	Octopus	notinAllTandemRepeatsandHomopolymers	AAAaaa	AAaaaa	154981
HG002+HG003+HG004	NovaSeq	10	FALSE	Octopus	notinAllTandemRepeatsandHomopolymers	AAAaaa	Aaaaaa	21550
HG002+HG003+HG004	NovaSeq	10	FALSE	Octopus	notinAllTandemRepeatsandHomopolymers	AAAaaa	aaaaaa	3968
HG002+HG003+HG004	NovaSeq	10	FALSE	Octopus	notinAllTandemRepeatsandHomopolymers	AAaaaa	AAAAAa	678
HG002+HG003+HG004	NovaSeq	10	FALSE	Octopus	notinAllTandemRepeatsandHomopolymers	AAaaaa	AAAAaa	18196
HG002+HG003+HG004	NovaSeq	10	FALSE	Octopus	notinAllTandemRepeatsandHomopolymers	AAaaaa	AAAaaa	119646
HG002+HG003+HG004	NovaSeq	10	FALSE	Octopus	notinAllTandemRepeatsandHomopolymers	AAaaaa	Aaaaaa	110212
HG002+HG003+HG004	NovaSeq	10	FALSE	Octopus	notinAllTandemRepeatsandHomopolymers	AAaaaa	aaaaaa	16916
HG002+HG003+HG004	NovaSeq	10	FALSE	Octopus	notinAllTandemRepeatsandHomopolymers	Aaaaaa	AAAAAa	61
HG002+HG003+HG004	NovaSeq	10	FALSE	Octopus	notinAllTandemRepeatsandHomopolymers	Aaaaaa	AAAAaa	890
HG002+HG003+HG004	NovaSeq	10	FALSE	Octopus	notinAllTandemRepeatsandHomopolymers	Aaaaaa	AAAaaa	8585
HG002+HG003+HG004	NovaSeq	10	FALSE	Octopus	notinAllTandemRepeatsandHomopolymers	Aaaaaa	AAaaaa	78791
HG002+HG003+HG004	NovaSeq	10	FALSE	Octopus	notinAllTandemRepeatsandHomopolymers	Aaaaaa	aaaaaa	64320
HG002+HG003+HG004	NovaSeq	10	FALSE	Octopus	notinAllTandemRepeatsandHomopolymers	aaaaaa	AAAAAa	55
HG002+HG003+HG004	NovaSeq	10	FALSE	Octopus	notinAllTandemRepeatsandHomopolymers	aaaaaa	AAAAaa	28
HG002+HG003+HG004	NovaSeq	10	FALSE	Octopus	notinAllTandemRepeatsandHomopolymers	aaaaaa	AAAaaa	104
HG002+HG003+HG004	NovaSeq	10	FALSE	Octopus	notinAllTandemRepeatsandHomopolymers	aaaaaa	AAaaaa	265
HG002+HG003+HG004	NovaSeq	10	FALSE	Octopus	notinAllTandemRepeatsandHomopolymers	aaaaaa	Aaaaaa	5727
HG002+HG003+HG004	NovaSeq	10	FALSE	Octopus	notinalldifficult	AAAAAa	AAAAaa	164775
HG002+HG003+HG004	NovaSeq	10	FALSE	Octopus	notinalldifficult	AAAAAa	AAAaaa	19787
HG002+HG003+HG004	NovaSeq	10	FALSE	Octopus	notinalldifficult	AAAAAa	AAaaaa	2029
HG002+HG003+HG004	NovaSeq	10	FALSE	Octopus	notinalldifficult	AAAAAa	Aaaaaa	99
HG002+HG003+HG004	NovaSeq	10	FALSE	Octopus	notinalldifficult	AAAAAa	aaaaaa	122
HG002+HG003+HG004	NovaSeq	10	FALSE	Octopus	notinalldifficult	AAAAaa	AAAAAa	72160
HG002+HG003+HG004	NovaSeq	10	FALSE	Octopus	notinalldifficult	AAAAaa	AAAaaa	217703
HG002+HG003+HG004	NovaSeq	10	FALSE	Octopus	notinalldifficult	AAAAaa	AAaaaa	35742
HG002+HG003+HG004	NovaSeq	10	FALSE	Octopus	notinalldifficult	AAAAaa	Aaaaaa	2810
HG002+HG003+HG004	NovaSeq	10	FALSE	Octopus	notinalldifficult	AAAAaa	aaaaaa	959
HG002+HG003+HG004	NovaSeq	10	FALSE	Octopus	notinalldifficult	AAAaaa	AAAAAa	6842
HG002+HG003+HG004	NovaSeq	10	FALSE	Octopus	notinalldifficult	AAAaaa	AAAAaa	127863
HG002+HG003+HG004	NovaSeq	10	FALSE	Octopus	notinalldifficult	AAAaaa	AAaaaa	136373
HG002+HG003+HG004	NovaSeq	10	FALSE	Octopus	notinalldifficult	AAAaaa	Aaaaaa	18920
HG002+HG003+HG004	NovaSeq	10	FALSE	Octopus	notinalldifficult	AAAaaa	aaaaaa	3239
HG002+HG003+HG004	NovaSeq	10	FALSE	Octopus	notinalldifficult	AAaaaa	AAAAAa	447
HG002+HG003+HG004	NovaSeq	10	FALSE	Octopus	notinalldifficult	AAaaaa	AAAAaa	15224
HG002+HG003+HG004	NovaSeq	10	FALSE	Octopus	notinalldifficult	AAaaaa	AAAaaa	103618
HG002+HG003+HG004	NovaSeq	10	FALSE	Octopus	notinalldifficult	AAaaaa	Aaaaaa	97143
HG002+HG003+HG004	NovaSeq	10	FALSE	Octopus	notinalldifficult	AAaaaa	aaaaaa	14393
HG002+HG003+HG004	NovaSeq	10	FALSE	Octopus	notinalldifficult	Aaaaaa	AAAAAa	17
HG002+HG003+HG004	NovaSeq	10	FALSE	Octopus	notinalldifficult	Aaaaaa	AAAAaa	597
HG002+HG003+HG004	NovaSeq	10	FALSE	Octopus	notinalldifficult	Aaaaaa	AAAaaa	6963
HG002+HG003+HG004	NovaSeq	10	FALSE	Octopus	notinalldifficult	Aaaaaa	AAaaaa	67598
HG002+HG003+HG004	NovaSeq	10	FALSE	Octopus	notinalldifficult	Aaaaaa	aaaaaa	55180
HG002+HG003+HG004	NovaSeq	10	FALSE	Octopus	notinalldifficult	aaaaaa	AAAAAa	6
HG002+HG003+HG004	NovaSeq	10	FALSE	Octopus	notinalldifficult	aaaaaa	AAAAaa	1
HG002+HG003+HG004	NovaSeq	10	FALSE	Octopus	notinalldifficult	aaaaaa	AAAaaa	3
HG002+HG003+HG004	NovaSeq	10	FALSE	Octopus	notinalldifficult	aaaaaa	AAaaaa	53
HG002+HG003+HG004	NovaSeq	10	FALSE	Octopus	notinalldifficult	aaaaaa	Aaaaaa	4601
HG002+HG003+HG004	NovaSeq	10	FALSE	Octopus	notinalllowmapandsegdup	AAAAAa	AAAAaa	195832
HG002+HG003+HG004	NovaSeq	10	FALSE	Octopus	notinalllowmapandsegdup	AAAAAa	AAAaaa	24212
HG002+HG003+HG004	NovaSeq	10	FALSE	Octopus	notinalllowmapandsegdup	AAAAAa	AAaaaa	2568
HG002+HG003+HG004	NovaSeq	10	FALSE	Octopus	notinalllowmapandsegdup	AAAAAa	Aaaaaa	147
HG002+HG003+HG004	NovaSeq	10	FALSE	Octopus	notinalllowmapandsegdup	AAAAAa	aaaaaa	193
HG002+HG003+HG004	NovaSeq	10	FALSE	Octopus	notinalllowmapandsegdup	AAAAaa	AAAAAa	89238
HG002+HG003+HG004	NovaSeq	10	FALSE	Octopus	notinalllowmapandsegdup	AAAAaa	AAAaaa	258267
HG002+HG003+HG004	NovaSeq	10	FALSE	Octopus	notinalllowmapandsegdup	AAAAaa	AAaaaa	43408
HG002+HG003+HG004	NovaSeq	10	FALSE	Octopus	notinalllowmapandsegdup	AAAAaa	Aaaaaa	3565
HG002+HG003+HG004	NovaSeq	10	FALSE	Octopus	notinalllowmapandsegdup	AAAAaa	aaaaaa	1332
HG002+HG003+HG004	NovaSeq	10	FALSE	Octopus	notinalllowmapandsegdup	AAAaaa	AAAAAa	8812
HG002+HG003+HG004	NovaSeq	10	FALSE	Octopus	notinalllowmapandsegdup	AAAaaa	AAAAaa	151633
HG002+HG003+HG004	NovaSeq	10	FALSE	Octopus	notinalllowmapandsegdup	AAAaaa	AAaaaa	162045
HG002+HG003+HG004	NovaSeq	10	FALSE	Octopus	notinalllowmapandsegdup	AAAaaa	Aaaaaa	23006
HG002+HG003+HG004	NovaSeq	10	FALSE	Octopus	notinalllowmapandsegdup	AAAaaa	aaaaaa	4264
HG002+HG003+HG004	NovaSeq	10	FALSE	Octopus	notinalllowmapandsegdup	AAaaaa	AAAAAa	646
HG002+HG003+HG004	NovaSeq	10	FALSE	Octopus	notinalllowmapandsegdup	AAaaaa	AAAAaa	18359
HG002+HG003+HG004	NovaSeq	10	FALSE	Octopus	notinalllowmapandsegdup	AAaaaa	AAAaaa	122545
HG002+HG003+HG004	NovaSeq	10	FALSE	Octopus	notinalllowmapandsegdup	AAaaaa	Aaaaaa	115074
HG002+HG003+HG004	NovaSeq	10	FALSE	Octopus	notinalllowmapandsegdup	AAaaaa	aaaaaa	17864
HG002+HG003+HG004	NovaSeq	10	FALSE	Octopus	notinalllowmapandsegdup	Aaaaaa	AAAAAa	33
HG002+HG003+HG004	NovaSeq	10	FALSE	Octopus	notinalllowmapandsegdup	Aaaaaa	AAAAaa	746
HG002+HG003+HG004	NovaSeq	10	FALSE	Octopus	notinalllowmapandsegdup	Aaaaaa	AAAaaa	8472
HG002+HG003+HG004	NovaSeq	10	FALSE	Octopus	notinalllowmapandsegdup	Aaaaaa	AAaaaa	80350
HG002+HG003+HG004	NovaSeq	10	FALSE	Octopus	notinalllowmapandsegdup	Aaaaaa	aaaaaa	67002
HG002+HG003+HG004	NovaSeq	10	FALSE	Octopus	notinalllowmapandsegdup	aaaaaa	AAAAAa	6
HG002+HG003+HG004	NovaSeq	10	FALSE	Octopus	notinalllowmapandsegdup	aaaaaa	AAAAaa	1
HG002+HG003+HG004	NovaSeq	10	FALSE	Octopus	notinalllowmapandsegdup	aaaaaa	AAAaaa	13
HG002+HG003+HG004	NovaSeq	10	FALSE	Octopus	notinalllowmapandsegdup	aaaaaa	AAaaaa	139
HG002+HG003+HG004	NovaSeq	10	FALSE	Octopus	notinalllowmapandsegdup	aaaaaa	Aaaaaa	6374
HG002+HG003+HG004	NovaSeq	10	TRUE	FreeBayes	AllTandemRepeatsandHomopolymers	AAAAAa	AAAAaa	6543
HG002+HG003+HG004	NovaSeq	10	TRUE	FreeBayes	AllTandemRepeatsandHomopolymers	AAAAAa	AAAaaa	1175
HG002+HG003+HG004	NovaSeq	10	TRUE	FreeBayes	AllTandemRepeatsandHomopolymers	AAAAAa	AAaaaa	113
HG002+HG003+HG004	NovaSeq	10	TRUE	FreeBayes	AllTandemRepeatsandHomopolymers	AAAAAa	Aaaaaa	2
HG002+HG003+HG004	NovaSeq	10	TRUE	FreeBayes	AllTandemRepeatsandHomopolymers	AAAAAa	aaaaaa	5
HG002+HG003+HG004	NovaSeq	10	TRUE	FreeBayes	AllTandemRepeatsandHomopolymers	AAAAaa	AAAAAa	4408
HG002+HG003+HG004	NovaSeq	10	TRUE	FreeBayes	AllTandemRepeatsandHomopolymers	AAAAaa	AAAaaa	9821
HG002+HG003+HG004	NovaSeq	10	TRUE	FreeBayes	AllTandemRepeatsandHomopolymers	AAAAaa	AAaaaa	2049
HG002+HG003+HG004	NovaSeq	10	TRUE	FreeBayes	AllTandemRepeatsandHomopolymers	AAAAaa	Aaaaaa	118
HG002+HG003+HG004	NovaSeq	10	TRUE	FreeBayes	AllTandemRepeatsandHomopolymers	AAAAaa	aaaaaa	36
HG002+HG003+HG004	NovaSeq	10	TRUE	FreeBayes	AllTandemRepeatsandHomopolymers	AAAaaa	AAAAAa	517
HG002+HG003+HG004	NovaSeq	10	TRUE	FreeBayes	AllTandemRepeatsandHomopolymers	AAAaaa	AAAAaa	5256
HG002+HG003+HG004	NovaSeq	10	TRUE	FreeBayes	AllTandemRepeatsandHomopolymers	AAAaaa	AAaaaa	5979
HG002+HG003+HG004	NovaSeq	10	TRUE	FreeBayes	AllTandemRepeatsandHomopolymers	AAAaaa	Aaaaaa	849
HG002+HG003+HG004	NovaSeq	10	TRUE	FreeBayes	AllTandemRepeatsandHomopolymers	AAAaaa	aaaaaa	126
HG002+HG003+HG004	NovaSeq	10	TRUE	FreeBayes	AllTandemRepeatsandHomopolymers	AAaaaa	AAAAAa	27
HG002+HG003+HG004	NovaSeq	10	TRUE	FreeBayes	AllTandemRepeatsandHomopolymers	AAaaaa	AAAAaa	783
HG002+HG003+HG004	NovaSeq	10	TRUE	FreeBayes	AllTandemRepeatsandHomopolymers	AAaaaa	AAAaaa	4517
HG002+HG003+HG004	NovaSeq	10	TRUE	FreeBayes	AllTandemRepeatsandHomopolymers	AAaaaa	Aaaaaa	3389
HG002+HG003+HG004	NovaSeq	10	TRUE	FreeBayes	AllTandemRepeatsandHomopolymers	AAaaaa	aaaaaa	564
HG002+HG003+HG004	NovaSeq	10	TRUE	FreeBayes	AllTandemRepeatsandHomopolymers	Aaaaaa	AAAAAa	2
HG002+HG003+HG004	NovaSeq	10	TRUE	FreeBayes	AllTandemRepeatsandHomopolymers	Aaaaaa	AAAAaa	37
HG002+HG003+HG004	NovaSeq	10	TRUE	FreeBayes	AllTandemRepeatsandHomopolymers	Aaaaaa	AAAaaa	445
HG002+HG003+HG004	NovaSeq	10	TRUE	FreeBayes	AllTandemRepeatsandHomopolymers	Aaaaaa	AAaaaa	3018
HG002+HG003+HG004	NovaSeq	10	TRUE	FreeBayes	AllTandemRepeatsandHomopolymers	Aaaaaa	aaaaaa	2453
HG002+HG003+HG004	NovaSeq	10	TRUE	FreeBayes	AllTandemRepeatsandHomopolymers	aaaaaa	AAAAaa	2
HG002+HG003+HG004	NovaSeq	10	TRUE	FreeBayes	AllTandemRepeatsandHomopolymers	aaaaaa	AAAaaa	2
HG002+HG003+HG004	NovaSeq	10	TRUE	FreeBayes	AllTandemRepeatsandHomopolymers	aaaaaa	AAaaaa	6
HG002+HG003+HG004	NovaSeq	10	TRUE	FreeBayes	AllTandemRepeatsandHomopolymers	aaaaaa	Aaaaaa	90
HG002+HG003+HG004	NovaSeq	10	TRUE	FreeBayes	alldifficult	AAAAAa	AAAAaa	24750
HG002+HG003+HG004	NovaSeq	10	TRUE	FreeBayes	alldifficult	AAAAAa	AAAaaa	4260
HG002+HG003+HG004	NovaSeq	10	TRUE	FreeBayes	alldifficult	AAAAAa	AAaaaa	393
HG002+HG003+HG004	NovaSeq	10	TRUE	FreeBayes	alldifficult	AAAAAa	Aaaaaa	8
HG002+HG003+HG004	NovaSeq	10	TRUE	FreeBayes	alldifficult	AAAAAa	aaaaaa	18
HG002+HG003+HG004	NovaSeq	10	TRUE	FreeBayes	alldifficult	AAAAaa	AAAAAa	17096
HG002+HG003+HG004	NovaSeq	10	TRUE	FreeBayes	alldifficult	AAAAaa	AAAaaa	35900
HG002+HG003+HG004	NovaSeq	10	TRUE	FreeBayes	alldifficult	AAAAaa	AAaaaa	7243
HG002+HG003+HG004	NovaSeq	10	TRUE	FreeBayes	alldifficult	AAAAaa	Aaaaaa	442
HG002+HG003+HG004	NovaSeq	10	TRUE	FreeBayes	alldifficult	AAAAaa	aaaaaa	141
HG002+HG003+HG004	NovaSeq	10	TRUE	FreeBayes	alldifficult	AAAaaa	AAAAAa	2174
HG002+HG003+HG004	NovaSeq	10	TRUE	FreeBayes	alldifficult	AAAaaa	AAAAaa	21275
HG002+HG003+HG004	NovaSeq	10	TRUE	FreeBayes	alldifficult	AAAaaa	AAaaaa	22356
HG002+HG003+HG004	NovaSeq	10	TRUE	FreeBayes	alldifficult	AAAaaa	Aaaaaa	3136
HG002+HG003+HG004	NovaSeq	10	TRUE	FreeBayes	alldifficult	AAAaaa	aaaaaa	542
HG002+HG003+HG004	NovaSeq	10	TRUE	FreeBayes	alldifficult	AAaaaa	AAAAAa	171
HG002+HG003+HG004	NovaSeq	10	TRUE	FreeBayes	alldifficult	AAaaaa	AAAAaa	3518
HG002+HG003+HG004	NovaSeq	10	TRUE	FreeBayes	alldifficult	AAaaaa	AAAaaa	18442
HG002+HG003+HG004	NovaSeq	10	TRUE	FreeBayes	alldifficult	AAaaaa	Aaaaaa	12704
HG002+HG003+HG004	NovaSeq	10	TRUE	FreeBayes	alldifficult	AAaaaa	aaaaaa	2281
HG002+HG003+HG004	NovaSeq	10	TRUE	FreeBayes	alldifficult	Aaaaaa	AAAAAa	4
HG002+HG003+HG004	NovaSeq	10	TRUE	FreeBayes	alldifficult	Aaaaaa	AAAAaa	207
HG002+HG003+HG004	NovaSeq	10	TRUE	FreeBayes	alldifficult	Aaaaaa	AAAaaa	2178
HG002+HG003+HG004	NovaSeq	10	TRUE	FreeBayes	alldifficult	Aaaaaa	AAaaaa	12576
HG002+HG003+HG004	NovaSeq	10	TRUE	FreeBayes	alldifficult	Aaaaaa	aaaaaa	9454
HG002+HG003+HG004	NovaSeq	10	TRUE	FreeBayes	alldifficult	aaaaaa	AAAAAa	1
HG002+HG003+HG004	NovaSeq	10	TRUE	FreeBayes	alldifficult	aaaaaa	AAAAaa	18
HG002+HG003+HG004	NovaSeq	10	TRUE	FreeBayes	alldifficult	aaaaaa	AAAaaa	58
HG002+HG003+HG004	NovaSeq	10	TRUE	FreeBayes	alldifficult	aaaaaa	AAaaaa	118
HG002+HG003+HG004	NovaSeq	10	TRUE	FreeBayes	alldifficult	aaaaaa	Aaaaaa	340
HG002+HG003+HG004	NovaSeq	10	TRUE	FreeBayes	alllowmapandsegdup	AAAAAa	AAAAaa	9597
HG002+HG003+HG004	NovaSeq	10	TRUE	FreeBayes	alllowmapandsegdup	AAAAAa	AAAaaa	1633
HG002+HG003+HG004	NovaSeq	10	TRUE	FreeBayes	alllowmapandsegdup	AAAAAa	AAaaaa	148
HG002+HG003+HG004	NovaSeq	10	TRUE	FreeBayes	alllowmapandsegdup	AAAAAa	Aaaaaa	3
HG002+HG003+HG004	NovaSeq	10	TRUE	FreeBayes	alllowmapandsegdup	AAAAAa	aaaaaa	9
HG002+HG003+HG004	NovaSeq	10	TRUE	FreeBayes	alllowmapandsegdup	AAAAaa	AAAAAa	6304
HG002+HG003+HG004	NovaSeq	10	TRUE	FreeBayes	alllowmapandsegdup	AAAAaa	AAAaaa	12694
HG002+HG003+HG004	NovaSeq	10	TRUE	FreeBayes	alllowmapandsegdup	AAAAaa	AAaaaa	2578
HG002+HG003+HG004	NovaSeq	10	TRUE	FreeBayes	alllowmapandsegdup	AAAAaa	Aaaaaa	159
HG002+HG003+HG004	NovaSeq	10	TRUE	FreeBayes	alllowmapandsegdup	AAAAaa	aaaaaa	65
HG002+HG003+HG004	NovaSeq	10	TRUE	FreeBayes	alllowmapandsegdup	AAAaaa	AAAAAa	954
HG002+HG003+HG004	NovaSeq	10	TRUE	FreeBayes	alllowmapandsegdup	AAAaaa	AAAAaa	8555
HG002+HG003+HG004	NovaSeq	10	TRUE	FreeBayes	alllowmapandsegdup	AAAaaa	AAaaaa	8044
HG002+HG003+HG004	NovaSeq	10	TRUE	FreeBayes	alllowmapandsegdup	AAAaaa	Aaaaaa	1061
HG002+HG003+HG004	NovaSeq	10	TRUE	FreeBayes	alllowmapandsegdup	AAAaaa	aaaaaa	249
HG002+HG003+HG004	NovaSeq	10	TRUE	FreeBayes	alllowmapandsegdup	AAaaaa	AAAAAa	85
HG002+HG003+HG004	NovaSeq	10	TRUE	FreeBayes	alllowmapandsegdup	AAaaaa	AAAAaa	1614
HG002+HG003+HG004	NovaSeq	10	TRUE	FreeBayes	alllowmapandsegdup	AAaaaa	AAAaaa	7432
HG002+HG003+HG004	NovaSeq	10	TRUE	FreeBayes	alllowmapandsegdup	AAaaaa	Aaaaaa	4303
HG002+HG003+HG004	NovaSeq	10	TRUE	FreeBayes	alllowmapandsegdup	AAaaaa	aaaaaa	927
HG002+HG003+HG004	NovaSeq	10	TRUE	FreeBayes	alllowmapandsegdup	Aaaaaa	AAAAAa	2
HG002+HG003+HG004	NovaSeq	10	TRUE	FreeBayes	alllowmapandsegdup	Aaaaaa	AAAAaa	134
HG002+HG003+HG004	NovaSeq	10	TRUE	FreeBayes	alllowmapandsegdup	Aaaaaa	AAAaaa	1101
HG002+HG003+HG004	NovaSeq	10	TRUE	FreeBayes	alllowmapandsegdup	Aaaaaa	AAaaaa	5244
HG002+HG003+HG004	NovaSeq	10	TRUE	FreeBayes	alllowmapandsegdup	Aaaaaa	aaaaaa	3971
HG002+HG003+HG004	NovaSeq	10	TRUE	FreeBayes	alllowmapandsegdup	aaaaaa	AAAAAa	1
HG002+HG003+HG004	NovaSeq	10	TRUE	FreeBayes	alllowmapandsegdup	aaaaaa	AAAAaa	17
HG002+HG003+HG004	NovaSeq	10	TRUE	FreeBayes	alllowmapandsegdup	aaaaaa	AAAaaa	55
HG002+HG003+HG004	NovaSeq	10	TRUE	FreeBayes	alllowmapandsegdup	aaaaaa	AAaaaa	110
HG002+HG003+HG004	NovaSeq	10	TRUE	FreeBayes	alllowmapandsegdup	aaaaaa	Aaaaaa	177
HG002+HG003+HG004	NovaSeq	10	TRUE	FreeBayes	genome	AAAAAa	AAAAaa	152300
HG002+HG003+HG004	NovaSeq	10	TRUE	FreeBayes	genome	AAAAAa	AAAaaa	26231
HG002+HG003+HG004	NovaSeq	10	TRUE	FreeBayes	genome	AAAAAa	AAaaaa	2390
HG002+HG003+HG004	NovaSeq	10	TRUE	FreeBayes	genome	AAAAAa	Aaaaaa	48
HG002+HG003+HG004	NovaSeq	10	TRUE	FreeBayes	genome	AAAAAa	aaaaaa	62
HG002+HG003+HG004	NovaSeq	10	TRUE	FreeBayes	genome	AAAAaa	AAAAAa	107805
HG002+HG003+HG004	NovaSeq	10	TRUE	FreeBayes	genome	AAAAaa	AAAaaa	232382
HG002+HG003+HG004	NovaSeq	10	TRUE	FreeBayes	genome	AAAAaa	AAaaaa	47172
HG002+HG003+HG004	NovaSeq	10	TRUE	FreeBayes	genome	AAAAaa	Aaaaaa	2848
HG002+HG003+HG004	NovaSeq	10	TRUE	FreeBayes	genome	AAAAaa	aaaaaa	668
HG002+HG003+HG004	NovaSeq	10	TRUE	FreeBayes	genome	AAAaaa	AAAAAa	12518
HG002+HG003+HG004	NovaSeq	10	TRUE	FreeBayes	genome	AAAaaa	AAAAaa	130077
HG002+HG003+HG004	NovaSeq	10	TRUE	FreeBayes	genome	AAAaaa	AAaaaa	148267
HG002+HG003+HG004	NovaSeq	10	TRUE	FreeBayes	genome	AAAaaa	Aaaaaa	21458
HG002+HG003+HG004	NovaSeq	10	TRUE	FreeBayes	genome	AAAaaa	aaaaaa	2900
HG002+HG003+HG004	NovaSeq	10	TRUE	FreeBayes	genome	AAaaaa	AAAAAa	727
HG002+HG003+HG004	NovaSeq	10	TRUE	FreeBayes	genome	AAaaaa	AAAAaa	19933
HG002+HG003+HG004	NovaSeq	10	TRUE	FreeBayes	genome	AAaaaa	AAAaaa	114955
HG002+HG003+HG004	NovaSeq	10	TRUE	FreeBayes	genome	AAaaaa	Aaaaaa	87354
HG002+HG003+HG004	NovaSeq	10	TRUE	FreeBayes	genome	AAaaaa	aaaaaa	13970
HG002+HG003+HG004	NovaSeq	10	TRUE	FreeBayes	genome	Aaaaaa	AAAAAa	8
HG002+HG003+HG004	NovaSeq	10	TRUE	FreeBayes	genome	Aaaaaa	AAAAaa	796
HG002+HG003+HG004	NovaSeq	10	TRUE	FreeBayes	genome	Aaaaaa	AAAaaa	11198
HG002+HG003+HG004	NovaSeq	10	TRUE	FreeBayes	genome	Aaaaaa	AAaaaa	74381
HG002+HG003+HG004	NovaSeq	10	TRUE	FreeBayes	genome	Aaaaaa	aaaaaa	57189
HG002+HG003+HG004	NovaSeq	10	TRUE	FreeBayes	genome	aaaaaa	AAAAAa	1
HG002+HG003+HG004	NovaSeq	10	TRUE	FreeBayes	genome	aaaaaa	AAAAaa	20
HG002+HG003+HG004	NovaSeq	10	TRUE	FreeBayes	genome	aaaaaa	AAAaaa	61
HG002+HG003+HG004	NovaSeq	10	TRUE	FreeBayes	genome	aaaaaa	AAaaaa	166
HG002+HG003+HG004	NovaSeq	10	TRUE	FreeBayes	genome	aaaaaa	Aaaaaa	1303
HG002+HG003+HG004	NovaSeq	10	TRUE	FreeBayes	notinAllTandemRepeatsandHomopolymers	AAAAAa	AAAAaa	145757
HG002+HG003+HG004	NovaSeq	10	TRUE	FreeBayes	notinAllTandemRepeatsandHomopolymers	AAAAAa	AAAaaa	25056
HG002+HG003+HG004	NovaSeq	10	TRUE	FreeBayes	notinAllTandemRepeatsandHomopolymers	AAAAAa	AAaaaa	2277
HG002+HG003+HG004	NovaSeq	10	TRUE	FreeBayes	notinAllTandemRepeatsandHomopolymers	AAAAAa	Aaaaaa	46
HG002+HG003+HG004	NovaSeq	10	TRUE	FreeBayes	notinAllTandemRepeatsandHomopolymers	AAAAAa	aaaaaa	57
HG002+HG003+HG004	NovaSeq	10	TRUE	FreeBayes	notinAllTandemRepeatsandHomopolymers	AAAAaa	AAAAAa	103397
HG002+HG003+HG004	NovaSeq	10	TRUE	FreeBayes	notinAllTandemRepeatsandHomopolymers	AAAAaa	AAAaaa	222561
HG002+HG003+HG004	NovaSeq	10	TRUE	FreeBayes	notinAllTandemRepeatsandHomopolymers	AAAAaa	AAaaaa	45123
HG002+HG003+HG004	NovaSeq	10	TRUE	FreeBayes	notinAllTandemRepeatsandHomopolymers	AAAAaa	Aaaaaa	2730
HG002+HG003+HG004	NovaSeq	10	TRUE	FreeBayes	notinAllTandemRepeatsandHomopolymers	AAAAaa	aaaaaa	632
HG002+HG003+HG004	NovaSeq	10	TRUE	FreeBayes	notinAllTandemRepeatsandHomopolymers	AAAaaa	AAAAAa	12001
HG002+HG003+HG004	NovaSeq	10	TRUE	FreeBayes	notinAllTandemRepeatsandHomopolymers	AAAaaa	AAAAaa	124821
HG002+HG003+HG004	NovaSeq	10	TRUE	FreeBayes	notinAllTandemRepeatsandHomopolymers	AAAaaa	AAaaaa	142288
HG002+HG003+HG004	NovaSeq	10	TRUE	FreeBayes	notinAllTandemRepeatsandHomopolymers	AAAaaa	Aaaaaa	20609
HG002+HG003+HG004	NovaSeq	10	TRUE	FreeBayes	notinAllTandemRepeatsandHomopolymers	AAAaaa	aaaaaa	2774
HG002+HG003+HG004	NovaSeq	10	TRUE	FreeBayes	notinAllTandemRepeatsandHomopolymers	AAaaaa	AAAAAa	700
HG002+HG003+HG004	NovaSeq	10	TRUE	FreeBayes	notinAllTandemRepeatsandHomopolymers	AAaaaa	AAAAaa	19150
HG002+HG003+HG004	NovaSeq	10	TRUE	FreeBayes	notinAllTandemRepeatsandHomopolymers	AAaaaa	AAAaaa	110438
HG002+HG003+HG004	NovaSeq	10	TRUE	FreeBayes	notinAllTandemRepeatsandHomopolymers	AAaaaa	Aaaaaa	83965
HG002+HG003+HG004	NovaSeq	10	TRUE	FreeBayes	notinAllTandemRepeatsandHomopolymers	AAaaaa	aaaaaa	13406
HG002+HG003+HG004	NovaSeq	10	TRUE	FreeBayes	notinAllTandemRepeatsandHomopolymers	Aaaaaa	AAAAAa	6
HG002+HG003+HG004	NovaSeq	10	TRUE	FreeBayes	notinAllTandemRepeatsandHomopolymers	Aaaaaa	AAAAaa	759
HG002+HG003+HG004	NovaSeq	10	TRUE	FreeBayes	notinAllTandemRepeatsandHomopolymers	Aaaaaa	AAAaaa	10753
HG002+HG003+HG004	NovaSeq	10	TRUE	FreeBayes	notinAllTandemRepeatsandHomopolymers	Aaaaaa	AAaaaa	71363
HG002+HG003+HG004	NovaSeq	10	TRUE	FreeBayes	notinAllTandemRepeatsandHomopolymers	Aaaaaa	aaaaaa	54736
HG002+HG003+HG004	NovaSeq	10	TRUE	FreeBayes	notinAllTandemRepeatsandHomopolymers	aaaaaa	AAAAAa	1
HG002+HG003+HG004	NovaSeq	10	TRUE	FreeBayes	notinAllTandemRepeatsandHomopolymers	aaaaaa	AAAAaa	18
HG002+HG003+HG004	NovaSeq	10	TRUE	FreeBayes	notinAllTandemRepeatsandHomopolymers	aaaaaa	AAAaaa	59
HG002+HG003+HG004	NovaSeq	10	TRUE	FreeBayes	notinAllTandemRepeatsandHomopolymers	aaaaaa	AAaaaa	160
HG002+HG003+HG004	NovaSeq	10	TRUE	FreeBayes	notinAllTandemRepeatsandHomopolymers	aaaaaa	Aaaaaa	1213
HG002+HG003+HG004	NovaSeq	10	TRUE	FreeBayes	notinalldifficult	AAAAAa	AAAAaa	127550
HG002+HG003+HG004	NovaSeq	10	TRUE	FreeBayes	notinalldifficult	AAAAAa	AAAaaa	21971
HG002+HG003+HG004	NovaSeq	10	TRUE	FreeBayes	notinalldifficult	AAAAAa	AAaaaa	1997
HG002+HG003+HG004	NovaSeq	10	TRUE	FreeBayes	notinalldifficult	AAAAAa	Aaaaaa	40
HG002+HG003+HG004	NovaSeq	10	TRUE	FreeBayes	notinalldifficult	AAAAAa	aaaaaa	44
HG002+HG003+HG004	NovaSeq	10	TRUE	FreeBayes	notinalldifficult	AAAAaa	AAAAAa	90709
HG002+HG003+HG004	NovaSeq	10	TRUE	FreeBayes	notinalldifficult	AAAAaa	AAAaaa	196482
HG002+HG003+HG004	NovaSeq	10	TRUE	FreeBayes	notinalldifficult	AAAAaa	AAaaaa	39929
HG002+HG003+HG004	NovaSeq	10	TRUE	FreeBayes	notinalldifficult	AAAAaa	Aaaaaa	2406
HG002+HG003+HG004	NovaSeq	10	TRUE	FreeBayes	notinalldifficult	AAAAaa	aaaaaa	527
HG002+HG003+HG004	NovaSeq	10	TRUE	FreeBayes	notinalldifficult	AAAaaa	AAAAAa	10344
HG002+HG003+HG004	NovaSeq	10	TRUE	FreeBayes	notinalldifficult	AAAaaa	AAAAaa	108802
HG002+HG003+HG004	NovaSeq	10	TRUE	FreeBayes	notinalldifficult	AAAaaa	AAaaaa	125911
HG002+HG003+HG004	NovaSeq	10	TRUE	FreeBayes	notinalldifficult	AAAaaa	Aaaaaa	18322
HG002+HG003+HG004	NovaSeq	10	TRUE	FreeBayes	notinalldifficult	AAAaaa	aaaaaa	2358
HG002+HG003+HG004	NovaSeq	10	TRUE	FreeBayes	notinalldifficult	AAaaaa	AAAAAa	556
HG002+HG003+HG004	NovaSeq	10	TRUE	FreeBayes	notinalldifficult	AAaaaa	AAAAaa	16415
HG002+HG003+HG004	NovaSeq	10	TRUE	FreeBayes	notinalldifficult	AAaaaa	AAAaaa	96513
HG002+HG003+HG004	NovaSeq	10	TRUE	FreeBayes	notinalldifficult	AAaaaa	Aaaaaa	74650
HG002+HG003+HG004	NovaSeq	10	TRUE	FreeBayes	notinalldifficult	AAaaaa	aaaaaa	11689
HG002+HG003+HG004	NovaSeq	10	TRUE	FreeBayes	notinalldifficult	Aaaaaa	AAAAAa	4
HG002+HG003+HG004	NovaSeq	10	TRUE	FreeBayes	notinalldifficult	Aaaaaa	AAAAaa	589
HG002+HG003+HG004	NovaSeq	10	TRUE	FreeBayes	notinalldifficult	Aaaaaa	AAAaaa	9020
HG002+HG003+HG004	NovaSeq	10	TRUE	FreeBayes	notinalldifficult	Aaaaaa	AAaaaa	61805
HG002+HG003+HG004	NovaSeq	10	TRUE	FreeBayes	notinalldifficult	Aaaaaa	aaaaaa	47735
HG002+HG003+HG004	NovaSeq	10	TRUE	FreeBayes	notinalldifficult	aaaaaa	AAAAaa	2
HG002+HG003+HG004	NovaSeq	10	TRUE	FreeBayes	notinalldifficult	aaaaaa	AAAaaa	3
HG002+HG003+HG004	NovaSeq	10	TRUE	FreeBayes	notinalldifficult	aaaaaa	AAaaaa	48
HG002+HG003+HG004	NovaSeq	10	TRUE	FreeBayes	notinalldifficult	aaaaaa	Aaaaaa	963
HG002+HG003+HG004	NovaSeq	10	TRUE	FreeBayes	notinalllowmapandsegdup	AAAAAa	AAAAaa	142703
HG002+HG003+HG004	NovaSeq	10	TRUE	FreeBayes	notinalllowmapandsegdup	AAAAAa	AAAaaa	24598
HG002+HG003+HG004	NovaSeq	10	TRUE	FreeBayes	notinalllowmapandsegdup	AAAAAa	AAaaaa	2242
HG002+HG003+HG004	NovaSeq	10	TRUE	FreeBayes	notinalllowmapandsegdup	AAAAAa	Aaaaaa	45
HG002+HG003+HG004	NovaSeq	10	TRUE	FreeBayes	notinalllowmapandsegdup	AAAAAa	aaaaaa	53
HG002+HG003+HG004	NovaSeq	10	TRUE	FreeBayes	notinalllowmapandsegdup	AAAAaa	AAAAAa	101501
HG002+HG003+HG004	NovaSeq	10	TRUE	FreeBayes	notinalllowmapandsegdup	AAAAaa	AAAaaa	219688
HG002+HG003+HG004	NovaSeq	10	TRUE	FreeBayes	notinalllowmapandsegdup	AAAAaa	AAaaaa	44594
HG002+HG003+HG004	NovaSeq	10	TRUE	FreeBayes	notinalllowmapandsegdup	AAAAaa	Aaaaaa	2689
HG002+HG003+HG004	NovaSeq	10	TRUE	FreeBayes	notinalllowmapandsegdup	AAAAaa	aaaaaa	603
HG002+HG003+HG004	NovaSeq	10	TRUE	FreeBayes	notinalllowmapandsegdup	AAAaaa	AAAAAa	11564
HG002+HG003+HG004	NovaSeq	10	TRUE	FreeBayes	notinalllowmapandsegdup	AAAaaa	AAAAaa	121522
HG002+HG003+HG004	NovaSeq	10	TRUE	FreeBayes	notinalllowmapandsegdup	AAAaaa	AAaaaa	140223
HG002+HG003+HG004	NovaSeq	10	TRUE	FreeBayes	notinalllowmapandsegdup	AAAaaa	Aaaaaa	20397
HG002+HG003+HG004	NovaSeq	10	TRUE	FreeBayes	notinalllowmapandsegdup	AAAaaa	aaaaaa	2651
HG002+HG003+HG004	NovaSeq	10	TRUE	FreeBayes	notinalllowmapandsegdup	AAaaaa	AAAAAa	642
HG002+HG003+HG004	NovaSeq	10	TRUE	FreeBayes	notinalllowmapandsegdup	AAaaaa	AAAAaa	18319
HG002+HG003+HG004	NovaSeq	10	TRUE	FreeBayes	notinalllowmapandsegdup	AAaaaa	AAAaaa	107523
HG002+HG003+HG004	NovaSeq	10	TRUE	FreeBayes	notinalllowmapandsegdup	AAaaaa	Aaaaaa	83051
HG002+HG003+HG004	NovaSeq	10	TRUE	FreeBayes	notinalllowmapandsegdup	AAaaaa	aaaaaa	13043
HG002+HG003+HG004	NovaSeq	10	TRUE	FreeBayes	notinalllowmapandsegdup	Aaaaaa	AAAAAa	6
HG002+HG003+HG004	NovaSeq	10	TRUE	FreeBayes	notinalllowmapandsegdup	Aaaaaa	AAAAaa	662
HG002+HG003+HG004	NovaSeq	10	TRUE	FreeBayes	notinalllowmapandsegdup	Aaaaaa	AAAaaa	10097
HG002+HG003+HG004	NovaSeq	10	TRUE	FreeBayes	notinalllowmapandsegdup	Aaaaaa	AAaaaa	69137
HG002+HG003+HG004	NovaSeq	10	TRUE	FreeBayes	notinalllowmapandsegdup	Aaaaaa	aaaaaa	53218
HG002+HG003+HG004	NovaSeq	10	TRUE	FreeBayes	notinalllowmapandsegdup	aaaaaa	AAAAaa	3
HG002+HG003+HG004	NovaSeq	10	TRUE	FreeBayes	notinalllowmapandsegdup	aaaaaa	AAAaaa	6
HG002+HG003+HG004	NovaSeq	10	TRUE	FreeBayes	notinalllowmapandsegdup	aaaaaa	AAaaaa	56
HG002+HG003+HG004	NovaSeq	10	TRUE	FreeBayes	notinalllowmapandsegdup	aaaaaa	Aaaaaa	1126
HG002+HG003+HG004	NovaSeq	10	TRUE	GATK4	AllTandemRepeatsandHomopolymers	AAAAAa	AAAAaa	14881
HG002+HG003+HG004	NovaSeq	10	TRUE	GATK4	AllTandemRepeatsandHomopolymers	AAAAAa	AAAaaa	2940
HG002+HG003+HG004	NovaSeq	10	TRUE	GATK4	AllTandemRepeatsandHomopolymers	AAAAAa	AAaaaa	367
HG002+HG003+HG004	NovaSeq	10	TRUE	GATK4	AllTandemRepeatsandHomopolymers	AAAAAa	Aaaaaa	51
HG002+HG003+HG004	NovaSeq	10	TRUE	GATK4	AllTandemRepeatsandHomopolymers	AAAAAa	aaaaaa	32
HG002+HG003+HG004	NovaSeq	10	TRUE	GATK4	AllTandemRepeatsandHomopolymers	AAAAaa	AAAAAa	13552
HG002+HG003+HG004	NovaSeq	10	TRUE	GATK4	AllTandemRepeatsandHomopolymers	AAAAaa	AAAaaa	23042
HG002+HG003+HG004	NovaSeq	10	TRUE	GATK4	AllTandemRepeatsandHomopolymers	AAAAaa	AAaaaa	5273
HG002+HG003+HG004	NovaSeq	10	TRUE	GATK4	AllTandemRepeatsandHomopolymers	AAAAaa	Aaaaaa	841
HG002+HG003+HG004	NovaSeq	10	TRUE	GATK4	AllTandemRepeatsandHomopolymers	AAAAaa	aaaaaa	247
HG002+HG003+HG004	NovaSeq	10	TRUE	GATK4	AllTandemRepeatsandHomopolymers	AAAaaa	AAAAAa	2018
HG002+HG003+HG004	NovaSeq	10	TRUE	GATK4	AllTandemRepeatsandHomopolymers	AAAaaa	AAAAaa	15907
HG002+HG003+HG004	NovaSeq	10	TRUE	GATK4	AllTandemRepeatsandHomopolymers	AAAaaa	AAaaaa	14371
HG002+HG003+HG004	NovaSeq	10	TRUE	GATK4	AllTandemRepeatsandHomopolymers	AAAaaa	Aaaaaa	4054
HG002+HG003+HG004	NovaSeq	10	TRUE	GATK4	AllTandemRepeatsandHomopolymers	AAAaaa	aaaaaa	765
HG002+HG003+HG004	NovaSeq	10	TRUE	GATK4	AllTandemRepeatsandHomopolymers	AAaaaa	AAAAAa	159
HG002+HG003+HG004	NovaSeq	10	TRUE	GATK4	AllTandemRepeatsandHomopolymers	AAaaaa	AAAAaa	3180
HG002+HG003+HG004	NovaSeq	10	TRUE	GATK4	AllTandemRepeatsandHomopolymers	AAaaaa	AAAaaa	13441
HG002+HG003+HG004	NovaSeq	10	TRUE	GATK4	AllTandemRepeatsandHomopolymers	AAaaaa	Aaaaaa	12918
HG002+HG003+HG004	NovaSeq	10	TRUE	GATK4	AllTandemRepeatsandHomopolymers	AAaaaa	aaaaaa	2523
HG002+HG003+HG004	NovaSeq	10	TRUE	GATK4	AllTandemRepeatsandHomopolymers	Aaaaaa	AAAAAa	1
HG002+HG003+HG004	NovaSeq	10	TRUE	GATK4	AllTandemRepeatsandHomopolymers	Aaaaaa	AAAAaa	189
HG002+HG003+HG004	NovaSeq	10	TRUE	GATK4	AllTandemRepeatsandHomopolymers	Aaaaaa	AAAaaa	1870
HG002+HG003+HG004	NovaSeq	10	TRUE	GATK4	AllTandemRepeatsandHomopolymers	Aaaaaa	AAaaaa	7881
HG002+HG003+HG004	NovaSeq	10	TRUE	GATK4	AllTandemRepeatsandHomopolymers	Aaaaaa	aaaaaa	8213
HG002+HG003+HG004	NovaSeq	10	TRUE	GATK4	AllTandemRepeatsandHomopolymers	aaaaaa	AAAaaa	18
HG002+HG003+HG004	NovaSeq	10	TRUE	GATK4	AllTandemRepeatsandHomopolymers	aaaaaa	AAaaaa	99
HG002+HG003+HG004	NovaSeq	10	TRUE	GATK4	AllTandemRepeatsandHomopolymers	aaaaaa	Aaaaaa	1503
HG002+HG003+HG004	NovaSeq	10	TRUE	GATK4	alldifficult	AAAAAa	AAAAaa	34354
HG002+HG003+HG004	NovaSeq	10	TRUE	GATK4	alldifficult	AAAAAa	AAAaaa	5867
HG002+HG003+HG004	NovaSeq	10	TRUE	GATK4	alldifficult	AAAAAa	AAaaaa	685
HG002+HG003+HG004	NovaSeq	10	TRUE	GATK4	alldifficult	AAAAAa	Aaaaaa	84
HG002+HG003+HG004	NovaSeq	10	TRUE	GATK4	alldifficult	AAAAAa	aaaaaa	60
HG002+HG003+HG004	NovaSeq	10	TRUE	GATK4	alldifficult	AAAAaa	AAAAAa	38416
HG002+HG003+HG004	NovaSeq	10	TRUE	GATK4	alldifficult	AAAAaa	AAAaaa	49418
HG002+HG003+HG004	NovaSeq	10	TRUE	GATK4	alldifficult	AAAAaa	AAaaaa	10449
HG002+HG003+HG004	NovaSeq	10	TRUE	GATK4	alldifficult	AAAAaa	Aaaaaa	1527
HG002+HG003+HG004	NovaSeq	10	TRUE	GATK4	alldifficult	AAAAaa	aaaaaa	420
HG002+HG003+HG004	NovaSeq	10	TRUE	GATK4	alldifficult	AAAaaa	AAAAAa	6020
HG002+HG003+HG004	NovaSeq	10	TRUE	GATK4	alldifficult	AAAaaa	AAAAaa	38003
HG002+HG003+HG004	NovaSeq	10	TRUE	GATK4	alldifficult	AAAaaa	AAaaaa	30264
HG002+HG003+HG004	NovaSeq	10	TRUE	GATK4	alldifficult	AAAaaa	Aaaaaa	7915
HG002+HG003+HG004	NovaSeq	10	TRUE	GATK4	alldifficult	AAAaaa	aaaaaa	1314
HG002+HG003+HG004	NovaSeq	10	TRUE	GATK4	alldifficult	AAaaaa	AAAAAa	571
HG002+HG003+HG004	NovaSeq	10	TRUE	GATK4	alldifficult	AAaaaa	AAAAaa	8005
HG002+HG003+HG004	NovaSeq	10	TRUE	GATK4	alldifficult	AAaaaa	AAAaaa	30289
HG002+HG003+HG004	NovaSeq	10	TRUE	GATK4	alldifficult	AAaaaa	Aaaaaa	27372
HG002+HG003+HG004	NovaSeq	10	TRUE	GATK4	alldifficult	AAaaaa	aaaaaa	4626
HG002+HG003+HG004	NovaSeq	10	TRUE	GATK4	alldifficult	Aaaaaa	AAAAAa	13
HG002+HG003+HG004	NovaSeq	10	TRUE	GATK4	alldifficult	Aaaaaa	AAAAaa	580
HG002+HG003+HG004	NovaSeq	10	TRUE	GATK4	alldifficult	Aaaaaa	AAAaaa	4410
HG002+HG003+HG004	NovaSeq	10	TRUE	GATK4	alldifficult	Aaaaaa	AAaaaa	18106
HG002+HG003+HG004	NovaSeq	10	TRUE	GATK4	alldifficult	Aaaaaa	aaaaaa	16128
HG002+HG003+HG004	NovaSeq	10	TRUE	GATK4	alldifficult	aaaaaa	AAAAAa	1
HG002+HG003+HG004	NovaSeq	10	TRUE	GATK4	alldifficult	aaaaaa	AAAAaa	10
HG002+HG003+HG004	NovaSeq	10	TRUE	GATK4	alldifficult	aaaaaa	AAAaaa	38
HG002+HG003+HG004	NovaSeq	10	TRUE	GATK4	alldifficult	aaaaaa	AAaaaa	196
HG002+HG003+HG004	NovaSeq	10	TRUE	GATK4	alldifficult	aaaaaa	Aaaaaa	2462
HG002+HG003+HG004	NovaSeq	10	TRUE	GATK4	alllowmapandsegdup	AAAAAa	AAAAaa	10062
HG002+HG003+HG004	NovaSeq	10	TRUE	GATK4	alllowmapandsegdup	AAAAAa	AAAaaa	1526
HG002+HG003+HG004	NovaSeq	10	TRUE	GATK4	alllowmapandsegdup	AAAAAa	AAaaaa	176
HG002+HG003+HG004	NovaSeq	10	TRUE	GATK4	alllowmapandsegdup	AAAAAa	Aaaaaa	19
HG002+HG003+HG004	NovaSeq	10	TRUE	GATK4	alllowmapandsegdup	AAAAAa	aaaaaa	18
HG002+HG003+HG004	NovaSeq	10	TRUE	GATK4	alllowmapandsegdup	AAAAaa	AAAAAa	12142
HG002+HG003+HG004	NovaSeq	10	TRUE	GATK4	alllowmapandsegdup	AAAAaa	AAAaaa	12465
HG002+HG003+HG004	NovaSeq	10	TRUE	GATK4	alllowmapandsegdup	AAAAaa	AAaaaa	2514
HG002+HG003+HG004	NovaSeq	10	TRUE	GATK4	alllowmapandsegdup	AAAAaa	Aaaaaa	342
HG002+HG003+HG004	NovaSeq	10	TRUE	GATK4	alllowmapandsegdup	AAAAaa	aaaaaa	103
HG002+HG003+HG004	NovaSeq	10	TRUE	GATK4	alllowmapandsegdup	AAAaaa	AAAAAa	2301
HG002+HG003+HG004	NovaSeq	10	TRUE	GATK4	alllowmapandsegdup	AAAaaa	AAAAaa	11666
HG002+HG003+HG004	NovaSeq	10	TRUE	GATK4	alllowmapandsegdup	AAAaaa	AAaaaa	7573
HG002+HG003+HG004	NovaSeq	10	TRUE	GATK4	alllowmapandsegdup	AAAaaa	Aaaaaa	1875
HG002+HG003+HG004	NovaSeq	10	TRUE	GATK4	alllowmapandsegdup	AAAaaa	aaaaaa	289
HG002+HG003+HG004	NovaSeq	10	TRUE	GATK4	alllowmapandsegdup	AAaaaa	AAAAAa	250
HG002+HG003+HG004	NovaSeq	10	TRUE	GATK4	alllowmapandsegdup	AAaaaa	AAAAaa	2781
HG002+HG003+HG004	NovaSeq	10	TRUE	GATK4	alllowmapandsegdup	AAaaaa	AAAaaa	8710
HG002+HG003+HG004	NovaSeq	10	TRUE	GATK4	alllowmapandsegdup	AAaaaa	Aaaaaa	6809
HG002+HG003+HG004	NovaSeq	10	TRUE	GATK4	alllowmapandsegdup	AAaaaa	aaaaaa	1066
HG002+HG003+HG004	NovaSeq	10	TRUE	GATK4	alllowmapandsegdup	Aaaaaa	AAAAAa	6
HG002+HG003+HG004	NovaSeq	10	TRUE	GATK4	alllowmapandsegdup	Aaaaaa	AAAAaa	285
HG002+HG003+HG004	NovaSeq	10	TRUE	GATK4	alllowmapandsegdup	Aaaaaa	AAAaaa	1560
HG002+HG003+HG004	NovaSeq	10	TRUE	GATK4	alllowmapandsegdup	Aaaaaa	AAaaaa	5497
HG002+HG003+HG004	NovaSeq	10	TRUE	GATK4	alllowmapandsegdup	Aaaaaa	aaaaaa	4160
HG002+HG003+HG004	NovaSeq	10	TRUE	GATK4	alllowmapandsegdup	aaaaaa	AAAAAa	1
HG002+HG003+HG004	NovaSeq	10	TRUE	GATK4	alllowmapandsegdup	aaaaaa	AAAAaa	10
HG002+HG003+HG004	NovaSeq	10	TRUE	GATK4	alllowmapandsegdup	aaaaaa	AAAaaa	21
HG002+HG003+HG004	NovaSeq	10	TRUE	GATK4	alllowmapandsegdup	aaaaaa	AAaaaa	93
HG002+HG003+HG004	NovaSeq	10	TRUE	GATK4	alllowmapandsegdup	aaaaaa	Aaaaaa	661
HG002+HG003+HG004	NovaSeq	10	TRUE	GATK4	genome	AAAAAa	AAAAaa	170184
HG002+HG003+HG004	NovaSeq	10	TRUE	GATK4	genome	AAAAAa	AAAaaa	26239
HG002+HG003+HG004	NovaSeq	10	TRUE	GATK4	genome	AAAAAa	AAaaaa	2626
HG002+HG003+HG004	NovaSeq	10	TRUE	GATK4	genome	AAAAAa	Aaaaaa	239
HG002+HG003+HG004	NovaSeq	10	TRUE	GATK4	genome	AAAAAa	aaaaaa	158
HG002+HG003+HG004	NovaSeq	10	TRUE	GATK4	genome	AAAAaa	AAAAAa	216279
HG002+HG003+HG004	NovaSeq	10	TRUE	GATK4	genome	AAAAaa	AAAaaa	247048
HG002+HG003+HG004	NovaSeq	10	TRUE	GATK4	genome	AAAAaa	AAaaaa	48116
HG002+HG003+HG004	NovaSeq	10	TRUE	GATK4	genome	AAAAaa	Aaaaaa	6475
HG002+HG003+HG004	NovaSeq	10	TRUE	GATK4	genome	AAAAaa	aaaaaa	1366
HG002+HG003+HG004	NovaSeq	10	TRUE	GATK4	genome	AAAaaa	AAAAAa	31677
HG002+HG003+HG004	NovaSeq	10	TRUE	GATK4	genome	AAAaaa	AAAAaa	186302
HG002+HG003+HG004	NovaSeq	10	TRUE	GATK4	genome	AAAaaa	AAaaaa	152017
HG002+HG003+HG004	NovaSeq	10	TRUE	GATK4	genome	AAAaaa	Aaaaaa	37725
HG002+HG003+HG004	NovaSeq	10	TRUE	GATK4	genome	AAAaaa	aaaaaa	4656
HG002+HG003+HG004	NovaSeq	10	TRUE	GATK4	genome	AAaaaa	AAAAAa	2499
HG002+HG003+HG004	NovaSeq	10	TRUE	GATK4	genome	AAaaaa	AAAAaa	35641
HG002+HG003+HG004	NovaSeq	10	TRUE	GATK4	genome	AAaaaa	AAAaaa	147534
HG002+HG003+HG004	NovaSeq	10	TRUE	GATK4	genome	AAaaaa	Aaaaaa	140940
HG002+HG003+HG004	NovaSeq	10	TRUE	GATK4	genome	AAaaaa	aaaaaa	19401
HG002+HG003+HG004	NovaSeq	10	TRUE	GATK4	genome	Aaaaaa	AAAAAa	42
HG002+HG003+HG004	NovaSeq	10	TRUE	GATK4	genome	Aaaaaa	AAAAaa	1966
HG002+HG003+HG004	NovaSeq	10	TRUE	GATK4	genome	Aaaaaa	AAAaaa	17907
HG002+HG003+HG004	NovaSeq	10	TRUE	GATK4	genome	Aaaaaa	AAaaaa	84507
HG002+HG003+HG004	NovaSeq	10	TRUE	GATK4	genome	Aaaaaa	aaaaaa	71654
HG002+HG003+HG004	NovaSeq	10	TRUE	GATK4	genome	aaaaaa	AAAAAa	1
HG002+HG003+HG004	NovaSeq	10	TRUE	GATK4	genome	aaaaaa	AAAAaa	10
HG002+HG003+HG004	NovaSeq	10	TRUE	GATK4	genome	aaaaaa	AAAaaa	44
HG002+HG003+HG004	NovaSeq	10	TRUE	GATK4	genome	aaaaaa	AAaaaa	295
HG002+HG003+HG004	NovaSeq	10	TRUE	GATK4	genome	aaaaaa	Aaaaaa	7080
HG002+HG003+HG004	NovaSeq	10	TRUE	GATK4	notinAllTandemRepeatsandHomopolymers	AAAAAa	AAAAaa	155334
HG002+HG003+HG004	NovaSeq	10	TRUE	GATK4	notinAllTandemRepeatsandHomopolymers	AAAAAa	AAAaaa	23301
HG002+HG003+HG004	NovaSeq	10	TRUE	GATK4	notinAllTandemRepeatsandHomopolymers	AAAAAa	AAaaaa	2260
HG002+HG003+HG004	NovaSeq	10	TRUE	GATK4	notinAllTandemRepeatsandHomopolymers	AAAAAa	Aaaaaa	188
HG002+HG003+HG004	NovaSeq	10	TRUE	GATK4	notinAllTandemRepeatsandHomopolymers	AAAAAa	aaaaaa	126
HG002+HG003+HG004	NovaSeq	10	TRUE	GATK4	notinAllTandemRepeatsandHomopolymers	AAAAaa	AAAAAa	202790
HG002+HG003+HG004	NovaSeq	10	TRUE	GATK4	notinAllTandemRepeatsandHomopolymers	AAAAaa	AAAaaa	224039
HG002+HG003+HG004	NovaSeq	10	TRUE	GATK4	notinAllTandemRepeatsandHomopolymers	AAAAaa	AAaaaa	42859
HG002+HG003+HG004	NovaSeq	10	TRUE	GATK4	notinAllTandemRepeatsandHomopolymers	AAAAaa	Aaaaaa	5636
HG002+HG003+HG004	NovaSeq	10	TRUE	GATK4	notinAllTandemRepeatsandHomopolymers	AAAAaa	aaaaaa	1121
HG002+HG003+HG004	NovaSeq	10	TRUE	GATK4	notinAllTandemRepeatsandHomopolymers	AAAaaa	AAAAAa	29658
HG002+HG003+HG004	NovaSeq	10	TRUE	GATK4	notinAllTandemRepeatsandHomopolymers	AAAaaa	AAAAaa	170427
HG002+HG003+HG004	NovaSeq	10	TRUE	GATK4	notinAllTandemRepeatsandHomopolymers	AAAaaa	AAaaaa	137667
HG002+HG003+HG004	NovaSeq	10	TRUE	GATK4	notinAllTandemRepeatsandHomopolymers	AAAaaa	Aaaaaa	33672
HG002+HG003+HG004	NovaSeq	10	TRUE	GATK4	notinAllTandemRepeatsandHomopolymers	AAAaaa	aaaaaa	3890
HG002+HG003+HG004	NovaSeq	10	TRUE	GATK4	notinAllTandemRepeatsandHomopolymers	AAaaaa	AAAAAa	2339
HG002+HG003+HG004	NovaSeq	10	TRUE	GATK4	notinAllTandemRepeatsandHomopolymers	AAaaaa	AAAAaa	32465
HG002+HG003+HG004	NovaSeq	10	TRUE	GATK4	notinAllTandemRepeatsandHomopolymers	AAaaaa	AAAaaa	134104
HG002+HG003+HG004	NovaSeq	10	TRUE	GATK4	notinAllTandemRepeatsandHomopolymers	AAaaaa	Aaaaaa	128030
HG002+HG003+HG004	NovaSeq	10	TRUE	GATK4	notinAllTandemRepeatsandHomopolymers	AAaaaa	aaaaaa	16879
HG002+HG003+HG004	NovaSeq	10	TRUE	GATK4	notinAllTandemRepeatsandHomopolymers	Aaaaaa	AAAAAa	41
HG002+HG003+HG004	NovaSeq	10	TRUE	GATK4	notinAllTandemRepeatsandHomopolymers	Aaaaaa	AAAAaa	1777
HG002+HG003+HG004	NovaSeq	10	TRUE	GATK4	notinAllTandemRepeatsandHomopolymers	Aaaaaa	AAAaaa	16040
HG002+HG003+HG004	NovaSeq	10	TRUE	GATK4	notinAllTandemRepeatsandHomopolymers	Aaaaaa	AAaaaa	76631
HG002+HG003+HG004	NovaSeq	10	TRUE	GATK4	notinAllTandemRepeatsandHomopolymers	Aaaaaa	aaaaaa	63443
HG002+HG003+HG004	NovaSeq	10	TRUE	GATK4	notinAllTandemRepeatsandHomopolymers	aaaaaa	AAAAAa	1
HG002+HG003+HG004	NovaSeq	10	TRUE	GATK4	notinAllTandemRepeatsandHomopolymers	aaaaaa	AAAAaa	10
HG002+HG003+HG004	NovaSeq	10	TRUE	GATK4	notinAllTandemRepeatsandHomopolymers	aaaaaa	AAAaaa	26
HG002+HG003+HG004	NovaSeq	10	TRUE	GATK4	notinAllTandemRepeatsandHomopolymers	aaaaaa	AAaaaa	196
HG002+HG003+HG004	NovaSeq	10	TRUE	GATK4	notinAllTandemRepeatsandHomopolymers	aaaaaa	Aaaaaa	5579
HG002+HG003+HG004	NovaSeq	10	TRUE	GATK4	notinalldifficult	AAAAAa	AAAAaa	135852
HG002+HG003+HG004	NovaSeq	10	TRUE	GATK4	notinalldifficult	AAAAAa	AAAaaa	20377
HG002+HG003+HG004	NovaSeq	10	TRUE	GATK4	notinalldifficult	AAAAAa	AAaaaa	1942
HG002+HG003+HG004	NovaSeq	10	TRUE	GATK4	notinalldifficult	AAAAAa	Aaaaaa	155
HG002+HG003+HG004	NovaSeq	10	TRUE	GATK4	notinalldifficult	AAAAAa	aaaaaa	98
HG002+HG003+HG004	NovaSeq	10	TRUE	GATK4	notinalldifficult	AAAAaa	AAAAAa	177910
HG002+HG003+HG004	NovaSeq	10	TRUE	GATK4	notinalldifficult	AAAAaa	AAAaaa	197659
HG002+HG003+HG004	NovaSeq	10	TRUE	GATK4	notinalldifficult	AAAAaa	AAaaaa	37679
HG002+HG003+HG004	NovaSeq	10	TRUE	GATK4	notinalldifficult	AAAAaa	Aaaaaa	4949
HG002+HG003+HG004	NovaSeq	10	TRUE	GATK4	notinalldifficult	AAAAaa	aaaaaa	948
HG002+HG003+HG004	NovaSeq	10	TRUE	GATK4	notinalldifficult	AAAaaa	AAAAAa	25658
HG002+HG003+HG004	NovaSeq	10	TRUE	GATK4	notinalldifficult	AAAaaa	AAAAaa	148324
HG002+HG003+HG004	NovaSeq	10	TRUE	GATK4	notinalldifficult	AAAaaa	AAaaaa	121763
HG002+HG003+HG004	NovaSeq	10	TRUE	GATK4	notinalldifficult	AAAaaa	Aaaaaa	29813
HG002+HG003+HG004	NovaSeq	10	TRUE	GATK4	notinalldifficult	AAAaaa	aaaaaa	3341
HG002+HG003+HG004	NovaSeq	10	TRUE	GATK4	notinalldifficult	AAaaaa	AAAAAa	1927
HG002+HG003+HG004	NovaSeq	10	TRUE	GATK4	notinalldifficult	AAaaaa	AAAAaa	27636
HG002+HG003+HG004	NovaSeq	10	TRUE	GATK4	notinalldifficult	AAaaaa	AAAaaa	117254
HG002+HG003+HG004	NovaSeq	10	TRUE	GATK4	notinalldifficult	AAaaaa	Aaaaaa	113573
HG002+HG003+HG004	NovaSeq	10	TRUE	GATK4	notinalldifficult	AAaaaa	aaaaaa	14775
HG002+HG003+HG004	NovaSeq	10	TRUE	GATK4	notinalldifficult	Aaaaaa	AAAAAa	29
HG002+HG003+HG004	NovaSeq	10	TRUE	GATK4	notinalldifficult	Aaaaaa	AAAAaa	1386
HG002+HG003+HG004	NovaSeq	10	TRUE	GATK4	notinalldifficult	Aaaaaa	AAAaaa	13499
HG002+HG003+HG004	NovaSeq	10	TRUE	GATK4	notinalldifficult	Aaaaaa	AAaaaa	66402
HG002+HG003+HG004	NovaSeq	10	TRUE	GATK4	notinalldifficult	Aaaaaa	aaaaaa	55523
HG002+HG003+HG004	NovaSeq	10	TRUE	GATK4	notinalldifficult	aaaaaa	AAAaaa	6
HG002+HG003+HG004	NovaSeq	10	TRUE	GATK4	notinalldifficult	aaaaaa	AAaaaa	99
HG002+HG003+HG004	NovaSeq	10	TRUE	GATK4	notinalldifficult	aaaaaa	Aaaaaa	4621
HG002+HG003+HG004	NovaSeq	10	TRUE	GATK4	notinalllowmapandsegdup	AAAAAa	AAAAaa	160122
HG002+HG003+HG004	NovaSeq	10	TRUE	GATK4	notinalllowmapandsegdup	AAAAAa	AAAaaa	24713
HG002+HG003+HG004	NovaSeq	10	TRUE	GATK4	notinalllowmapandsegdup	AAAAAa	AAaaaa	2450
HG002+HG003+HG004	NovaSeq	10	TRUE	GATK4	notinalllowmapandsegdup	AAAAAa	Aaaaaa	220
HG002+HG003+HG004	NovaSeq	10	TRUE	GATK4	notinalllowmapandsegdup	AAAAAa	aaaaaa	140
HG002+HG003+HG004	NovaSeq	10	TRUE	GATK4	notinalllowmapandsegdup	AAAAaa	AAAAAa	204133
HG002+HG003+HG004	NovaSeq	10	TRUE	GATK4	notinalllowmapandsegdup	AAAAaa	AAAaaa	234583
HG002+HG003+HG004	NovaSeq	10	TRUE	GATK4	notinalllowmapandsegdup	AAAAaa	AAaaaa	45600
HG002+HG003+HG004	NovaSeq	10	TRUE	GATK4	notinalllowmapandsegdup	AAAAaa	Aaaaaa	6133
HG002+HG003+HG004	NovaSeq	10	TRUE	GATK4	notinalllowmapandsegdup	AAAAaa	aaaaaa	1263
HG002+HG003+HG004	NovaSeq	10	TRUE	GATK4	notinalllowmapandsegdup	AAAaaa	AAAAAa	29376
HG002+HG003+HG004	NovaSeq	10	TRUE	GATK4	notinalllowmapandsegdup	AAAaaa	AAAAaa	174621
HG002+HG003+HG004	NovaSeq	10	TRUE	GATK4	notinalllowmapandsegdup	AAAaaa	AAaaaa	144438
HG002+HG003+HG004	NovaSeq	10	TRUE	GATK4	notinalllowmapandsegdup	AAAaaa	Aaaaaa	35850
HG002+HG003+HG004	NovaSeq	10	TRUE	GATK4	notinalllowmapandsegdup	AAAaaa	aaaaaa	4367
HG002+HG003+HG004	NovaSeq	10	TRUE	GATK4	notinalllowmapandsegdup	AAaaaa	AAAAAa	2248
HG002+HG003+HG004	NovaSeq	10	TRUE	GATK4	notinalllowmapandsegdup	AAaaaa	AAAAaa	32856
HG002+HG003+HG004	NovaSeq	10	TRUE	GATK4	notinalllowmapandsegdup	AAaaaa	AAAaaa	138820
HG002+HG003+HG004	NovaSeq	10	TRUE	GATK4	notinalllowmapandsegdup	AAaaaa	Aaaaaa	134128
HG002+HG003+HG004	NovaSeq	10	TRUE	GATK4	notinalllowmapandsegdup	AAaaaa	aaaaaa	18335
HG002+HG003+HG004	NovaSeq	10	TRUE	GATK4	notinalllowmapandsegdup	Aaaaaa	AAAAAa	36
HG002+HG003+HG004	NovaSeq	10	TRUE	GATK4	notinalllowmapandsegdup	Aaaaaa	AAAAaa	1681
HG002+HG003+HG004	NovaSeq	10	TRUE	GATK4	notinalllowmapandsegdup	Aaaaaa	AAAaaa	16347
HG002+HG003+HG004	NovaSeq	10	TRUE	GATK4	notinalllowmapandsegdup	Aaaaaa	AAaaaa	79006
HG002+HG003+HG004	NovaSeq	10	TRUE	GATK4	notinalllowmapandsegdup	Aaaaaa	aaaaaa	67490
HG002+HG003+HG004	NovaSeq	10	TRUE	GATK4	notinalllowmapandsegdup	aaaaaa	AAAaaa	23
HG002+HG003+HG004	NovaSeq	10	TRUE	GATK4	notinalllowmapandsegdup	aaaaaa	AAaaaa	202
HG002+HG003+HG004	NovaSeq	10	TRUE	GATK4	notinalllowmapandsegdup	aaaaaa	Aaaaaa	6420
HG002+HG003+HG004	NovaSeq	10	TRUE	Octopus	AllTandemRepeatsandHomopolymers	AAAAAa	AAAAaa	19210
HG002+HG003+HG004	NovaSeq	10	TRUE	Octopus	AllTandemRepeatsandHomopolymers	AAAAAa	AAAaaa	2960
HG002+HG003+HG004	NovaSeq	10	TRUE	Octopus	AllTandemRepeatsandHomopolymers	AAAAAa	AAaaaa	341
HG002+HG003+HG004	NovaSeq	10	TRUE	Octopus	AllTandemRepeatsandHomopolymers	AAAAAa	Aaaaaa	29
HG002+HG003+HG004	NovaSeq	10	TRUE	Octopus	AllTandemRepeatsandHomopolymers	AAAAAa	aaaaaa	53
HG002+HG003+HG004	NovaSeq	10	TRUE	Octopus	AllTandemRepeatsandHomopolymers	AAAAaa	AAAAAa	9484
HG002+HG003+HG004	NovaSeq	10	TRUE	Octopus	AllTandemRepeatsandHomopolymers	AAAAaa	AAAaaa	25109
HG002+HG003+HG004	NovaSeq	10	TRUE	Octopus	AllTandemRepeatsandHomopolymers	AAAAaa	AAaaaa	4956
HG002+HG003+HG004	NovaSeq	10	TRUE	Octopus	AllTandemRepeatsandHomopolymers	AAAAaa	Aaaaaa	473
HG002+HG003+HG004	NovaSeq	10	TRUE	Octopus	AllTandemRepeatsandHomopolymers	AAAAaa	aaaaaa	288
HG002+HG003+HG004	NovaSeq	10	TRUE	Octopus	AllTandemRepeatsandHomopolymers	AAAaaa	AAAAAa	1021
HG002+HG003+HG004	NovaSeq	10	TRUE	Octopus	AllTandemRepeatsandHomopolymers	AAAaaa	AAAAaa	14297
HG002+HG003+HG004	NovaSeq	10	TRUE	Octopus	AllTandemRepeatsandHomopolymers	AAAaaa	AAaaaa	15996
HG002+HG003+HG004	NovaSeq	10	TRUE	Octopus	AllTandemRepeatsandHomopolymers	AAAaaa	Aaaaaa	2637
HG002+HG003+HG004	NovaSeq	10	TRUE	Octopus	AllTandemRepeatsandHomopolymers	AAAaaa	aaaaaa	785
HG002+HG003+HG004	NovaSeq	10	TRUE	Octopus	AllTandemRepeatsandHomopolymers	AAaaaa	AAAAAa	73
HG002+HG003+HG004	NovaSeq	10	TRUE	Octopus	AllTandemRepeatsandHomopolymers	AAaaaa	AAAAaa	1909
HG002+HG003+HG004	NovaSeq	10	TRUE	Octopus	AllTandemRepeatsandHomopolymers	AAaaaa	AAAaaa	11558
HG002+HG003+HG004	NovaSeq	10	TRUE	Octopus	AllTandemRepeatsandHomopolymers	AAaaaa	Aaaaaa	10854
HG002+HG003+HG004	NovaSeq	10	TRUE	Octopus	AllTandemRepeatsandHomopolymers	AAaaaa	aaaaaa	2431
HG002+HG003+HG004	NovaSeq	10	TRUE	Octopus	AllTandemRepeatsandHomopolymers	Aaaaaa	AAAAAa	1
HG002+HG003+HG004	NovaSeq	10	TRUE	Octopus	AllTandemRepeatsandHomopolymers	Aaaaaa	AAAAaa	89
HG002+HG003+HG004	NovaSeq	10	TRUE	Octopus	AllTandemRepeatsandHomopolymers	Aaaaaa	AAAaaa	1019
HG002+HG003+HG004	NovaSeq	10	TRUE	Octopus	AllTandemRepeatsandHomopolymers	Aaaaaa	AAaaaa	7794
HG002+HG003+HG004	NovaSeq	10	TRUE	Octopus	AllTandemRepeatsandHomopolymers	Aaaaaa	aaaaaa	8076
HG002+HG003+HG004	NovaSeq	10	TRUE	Octopus	AllTandemRepeatsandHomopolymers	aaaaaa	AAAAaa	2
HG002+HG003+HG004	NovaSeq	10	TRUE	Octopus	AllTandemRepeatsandHomopolymers	aaaaaa	AAAaaa	3
HG002+HG003+HG004	NovaSeq	10	TRUE	Octopus	AllTandemRepeatsandHomopolymers	aaaaaa	AAaaaa	57
HG002+HG003+HG004	NovaSeq	10	TRUE	Octopus	AllTandemRepeatsandHomopolymers	aaaaaa	Aaaaaa	1328
HG002+HG003+HG004	NovaSeq	10	TRUE	Octopus	alldifficult	AAAAAa	AAAAaa	42434
HG002+HG003+HG004	NovaSeq	10	TRUE	Octopus	alldifficult	AAAAAa	AAAaaa	5910
HG002+HG003+HG004	NovaSeq	10	TRUE	Octopus	alldifficult	AAAAAa	AAaaaa	610
HG002+HG003+HG004	NovaSeq	10	TRUE	Octopus	alldifficult	AAAAAa	Aaaaaa	37
HG002+HG003+HG004	NovaSeq	10	TRUE	Octopus	alldifficult	AAAAAa	aaaaaa	107
HG002+HG003+HG004	NovaSeq	10	TRUE	Octopus	alldifficult	AAAAaa	AAAAAa	19011
HG002+HG003+HG004	NovaSeq	10	TRUE	Octopus	alldifficult	AAAAaa	AAAaaa	54810
HG002+HG003+HG004	NovaSeq	10	TRUE	Octopus	alldifficult	AAAAaa	AAaaaa	9778
HG002+HG003+HG004	NovaSeq	10	TRUE	Octopus	alldifficult	AAAAaa	Aaaaaa	841
HG002+HG003+HG004	NovaSeq	10	TRUE	Octopus	alldifficult	AAAAaa	aaaaaa	519
HG002+HG003+HG004	NovaSeq	10	TRUE	Octopus	alldifficult	AAAaaa	AAAAAa	1949
HG002+HG003+HG004	NovaSeq	10	TRUE	Octopus	alldifficult	AAAaaa	AAAAaa	33339
HG002+HG003+HG004	NovaSeq	10	TRUE	Octopus	alldifficult	AAAaaa	AAaaaa	34107
HG002+HG003+HG004	NovaSeq	10	TRUE	Octopus	alldifficult	AAAaaa	Aaaaaa	5134
HG002+HG003+HG004	NovaSeq	10	TRUE	Octopus	alldifficult	AAAaaa	aaaaaa	1456
HG002+HG003+HG004	NovaSeq	10	TRUE	Octopus	alldifficult	AAaaaa	AAAAAa	125
HG002+HG003+HG004	NovaSeq	10	TRUE	Octopus	alldifficult	AAaaaa	AAAAaa	4450
HG002+HG003+HG004	NovaSeq	10	TRUE	Octopus	alldifficult	AAaaaa	AAAaaa	27185
HG002+HG003+HG004	NovaSeq	10	TRUE	Octopus	alldifficult	AAaaaa	Aaaaaa	23601
HG002+HG003+HG004	NovaSeq	10	TRUE	Octopus	alldifficult	AAaaaa	aaaaaa	4858
HG002+HG003+HG004	NovaSeq	10	TRUE	Octopus	alldifficult	Aaaaaa	AAAAAa	3
HG002+HG003+HG004	NovaSeq	10	TRUE	Octopus	alldifficult	Aaaaaa	AAAAaa	265
HG002+HG003+HG004	NovaSeq	10	TRUE	Octopus	alldifficult	Aaaaaa	AAAaaa	2444
HG002+HG003+HG004	NovaSeq	10	TRUE	Octopus	alldifficult	Aaaaaa	AAaaaa	18683
HG002+HG003+HG004	NovaSeq	10	TRUE	Octopus	alldifficult	Aaaaaa	aaaaaa	17070
HG002+HG003+HG004	NovaSeq	10	TRUE	Octopus	alldifficult	aaaaaa	AAAAAa	1
HG002+HG003+HG004	NovaSeq	10	TRUE	Octopus	alldifficult	aaaaaa	AAAAaa	12
HG002+HG003+HG004	NovaSeq	10	TRUE	Octopus	alldifficult	aaaaaa	AAAaaa	62
HG002+HG003+HG004	NovaSeq	10	TRUE	Octopus	alldifficult	aaaaaa	AAaaaa	210
HG002+HG003+HG004	NovaSeq	10	TRUE	Octopus	alldifficult	aaaaaa	Aaaaaa	2317
HG002+HG003+HG004	NovaSeq	10	TRUE	Octopus	alllowmapandsegdup	AAAAAa	AAAAaa	12038
HG002+HG003+HG004	NovaSeq	10	TRUE	Octopus	alllowmapandsegdup	AAAAAa	AAAaaa	1594
HG002+HG003+HG004	NovaSeq	10	TRUE	Octopus	alllowmapandsegdup	AAAAAa	AAaaaa	148
HG002+HG003+HG004	NovaSeq	10	TRUE	Octopus	alllowmapandsegdup	AAAAAa	Aaaaaa	6
HG002+HG003+HG004	NovaSeq	10	TRUE	Octopus	alllowmapandsegdup	AAAAAa	aaaaaa	43
HG002+HG003+HG004	NovaSeq	10	TRUE	Octopus	alllowmapandsegdup	AAAAaa	AAAAAa	4598
HG002+HG003+HG004	NovaSeq	10	TRUE	Octopus	alllowmapandsegdup	AAAAaa	AAAaaa	14722
HG002+HG003+HG004	NovaSeq	10	TRUE	Octopus	alllowmapandsegdup	AAAAaa	AAaaaa	2431
HG002+HG003+HG004	NovaSeq	10	TRUE	Octopus	alllowmapandsegdup	AAAAaa	Aaaaaa	186
HG002+HG003+HG004	NovaSeq	10	TRUE	Octopus	alllowmapandsegdup	AAAAaa	aaaaaa	156
HG002+HG003+HG004	NovaSeq	10	TRUE	Octopus	alllowmapandsegdup	AAAaaa	AAAAAa	529
HG002+HG003+HG004	NovaSeq	10	TRUE	Octopus	alllowmapandsegdup	AAAaaa	AAAAaa	10297
HG002+HG003+HG004	NovaSeq	10	TRUE	Octopus	alllowmapandsegdup	AAAaaa	AAaaaa	8995
HG002+HG003+HG004	NovaSeq	10	TRUE	Octopus	alllowmapandsegdup	AAAaaa	Aaaaaa	1226
HG002+HG003+HG004	NovaSeq	10	TRUE	Octopus	alllowmapandsegdup	AAAaaa	aaaaaa	435
HG002+HG003+HG004	NovaSeq	10	TRUE	Octopus	alllowmapandsegdup	AAaaaa	AAAAAa	29
HG002+HG003+HG004	NovaSeq	10	TRUE	Octopus	alllowmapandsegdup	AAaaaa	AAAAaa	1512
HG002+HG003+HG004	NovaSeq	10	TRUE	Octopus	alllowmapandsegdup	AAaaaa	AAAaaa	8522
HG002+HG003+HG004	NovaSeq	10	TRUE	Octopus	alllowmapandsegdup	AAaaaa	Aaaaaa	6075
HG002+HG003+HG004	NovaSeq	10	TRUE	Octopus	alllowmapandsegdup	AAaaaa	aaaaaa	1396
HG002+HG003+HG004	NovaSeq	10	TRUE	Octopus	alllowmapandsegdup	Aaaaaa	AAAAAa	3
HG002+HG003+HG004	NovaSeq	10	TRUE	Octopus	alllowmapandsegdup	Aaaaaa	AAAAaa	140
HG002+HG003+HG004	NovaSeq	10	TRUE	Octopus	alllowmapandsegdup	Aaaaaa	AAAaaa	995
HG002+HG003+HG004	NovaSeq	10	TRUE	Octopus	alllowmapandsegdup	Aaaaaa	AAaaaa	6137
HG002+HG003+HG004	NovaSeq	10	TRUE	Octopus	alllowmapandsegdup	Aaaaaa	aaaaaa	5257
HG002+HG003+HG004	NovaSeq	10	TRUE	Octopus	alllowmapandsegdup	aaaaaa	AAAAAa	1
HG002+HG003+HG004	NovaSeq	10	TRUE	Octopus	alllowmapandsegdup	aaaaaa	AAAAaa	12
HG002+HG003+HG004	NovaSeq	10	TRUE	Octopus	alllowmapandsegdup	aaaaaa	AAAaaa	59
HG002+HG003+HG004	NovaSeq	10	TRUE	Octopus	alllowmapandsegdup	aaaaaa	AAaaaa	154
HG002+HG003+HG004	NovaSeq	10	TRUE	Octopus	alllowmapandsegdup	aaaaaa	Aaaaaa	734
HG002+HG003+HG004	NovaSeq	10	TRUE	Octopus	genome	AAAAAa	AAAAaa	205113
HG002+HG003+HG004	NovaSeq	10	TRUE	Octopus	genome	AAAAAa	AAAaaa	25496
HG002+HG003+HG004	NovaSeq	10	TRUE	Octopus	genome	AAAAAa	AAaaaa	2535
HG002+HG003+HG004	NovaSeq	10	TRUE	Octopus	genome	AAAAAa	Aaaaaa	120
HG002+HG003+HG004	NovaSeq	10	TRUE	Octopus	genome	AAAAAa	aaaaaa	224
HG002+HG003+HG004	NovaSeq	10	TRUE	Octopus	genome	AAAAaa	AAAAAa	84997
HG002+HG003+HG004	NovaSeq	10	TRUE	Octopus	genome	AAAAaa	AAAaaa	271114
HG002+HG003+HG004	NovaSeq	10	TRUE	Octopus	genome	AAAAaa	AAaaaa	44897
HG002+HG003+HG004	NovaSeq	10	TRUE	Octopus	genome	AAAAaa	Aaaaaa	3538
HG002+HG003+HG004	NovaSeq	10	TRUE	Octopus	genome	AAAAaa	aaaaaa	1459
HG002+HG003+HG004	NovaSeq	10	TRUE	Octopus	genome	AAAaaa	AAAAAa	7700
HG002+HG003+HG004	NovaSeq	10	TRUE	Octopus	genome	AAAaaa	AAAAaa	159053
HG002+HG003+HG004	NovaSeq	10	TRUE	Octopus	genome	AAAaaa	AAaaaa	168966
HG002+HG003+HG004	NovaSeq	10	TRUE	Octopus	genome	AAAaaa	Aaaaaa	23718
HG002+HG003+HG004	NovaSeq	10	TRUE	Octopus	genome	AAAaaa	aaaaaa	4681
HG002+HG003+HG004	NovaSeq	10	TRUE	Octopus	genome	AAaaaa	AAAAAa	405
HG002+HG003+HG004	NovaSeq	10	TRUE	Octopus	genome	AAaaaa	AAAAaa	19171
HG002+HG003+HG004	NovaSeq	10	TRUE	Octopus	genome	AAaaaa	AAAaaa	129965
HG002+HG003+HG004	NovaSeq	10	TRUE	Octopus	genome	AAaaaa	Aaaaaa	119698
HG002+HG003+HG004	NovaSeq	10	TRUE	Octopus	genome	AAaaaa	aaaaaa	19238
HG002+HG003+HG004	NovaSeq	10	TRUE	Octopus	genome	Aaaaaa	AAAAAa	6
HG002+HG003+HG004	NovaSeq	10	TRUE	Octopus	genome	Aaaaaa	AAAAaa	792
HG002+HG003+HG004	NovaSeq	10	TRUE	Octopus	genome	Aaaaaa	AAAaaa	9291
HG002+HG003+HG004	NovaSeq	10	TRUE	Octopus	genome	Aaaaaa	AAaaaa	85946
HG002+HG003+HG004	NovaSeq	10	TRUE	Octopus	genome	Aaaaaa	aaaaaa	72236
HG002+HG003+HG004	NovaSeq	10	TRUE	Octopus	genome	aaaaaa	AAAAAa	1
HG002+HG003+HG004	NovaSeq	10	TRUE	Octopus	genome	aaaaaa	AAAAaa	12
HG002+HG003+HG004	NovaSeq	10	TRUE	Octopus	genome	aaaaaa	AAAaaa	64
HG002+HG003+HG004	NovaSeq	10	TRUE	Octopus	genome	aaaaaa	AAaaaa	247
HG002+HG003+HG004	NovaSeq	10	TRUE	Octopus	genome	aaaaaa	Aaaaaa	6660
HG002+HG003+HG004	NovaSeq	10	TRUE	Octopus	notinAllTandemRepeatsandHomopolymers	AAAAAa	AAAAaa	185943
HG002+HG003+HG004	NovaSeq	10	TRUE	Octopus	notinAllTandemRepeatsandHomopolymers	AAAAAa	AAAaaa	22540
HG002+HG003+HG004	NovaSeq	10	TRUE	Octopus	notinAllTandemRepeatsandHomopolymers	AAAAAa	AAaaaa	2196
HG002+HG003+HG004	NovaSeq	10	TRUE	Octopus	notinAllTandemRepeatsandHomopolymers	AAAAAa	Aaaaaa	91
HG002+HG003+HG004	NovaSeq	10	TRUE	Octopus	notinAllTandemRepeatsandHomopolymers	AAAAAa	aaaaaa	171
HG002+HG003+HG004	NovaSeq	10	TRUE	Octopus	notinAllTandemRepeatsandHomopolymers	AAAAaa	AAAAAa	75548
HG002+HG003+HG004	NovaSeq	10	TRUE	Octopus	notinAllTandemRepeatsandHomopolymers	AAAAaa	AAAaaa	246049
HG002+HG003+HG004	NovaSeq	10	TRUE	Octopus	notinAllTandemRepeatsandHomopolymers	AAAAaa	AAaaaa	39953
HG002+HG003+HG004	NovaSeq	10	TRUE	Octopus	notinAllTandemRepeatsandHomopolymers	AAAAaa	Aaaaaa	3067
HG002+HG003+HG004	NovaSeq	10	TRUE	Octopus	notinAllTandemRepeatsandHomopolymers	AAAAaa	aaaaaa	1173
HG002+HG003+HG004	NovaSeq	10	TRUE	Octopus	notinAllTandemRepeatsandHomopolymers	AAAaaa	AAAAAa	6678
HG002+HG003+HG004	NovaSeq	10	TRUE	Octopus	notinAllTandemRepeatsandHomopolymers	AAAaaa	AAAAaa	144789
HG002+HG003+HG004	NovaSeq	10	TRUE	Octopus	notinAllTandemRepeatsandHomopolymers	AAAaaa	AAaaaa	152990
HG002+HG003+HG004	NovaSeq	10	TRUE	Octopus	notinAllTandemRepeatsandHomopolymers	AAAaaa	Aaaaaa	21079
HG002+HG003+HG004	NovaSeq	10	TRUE	Octopus	notinAllTandemRepeatsandHomopolymers	AAAaaa	aaaaaa	3895
HG002+HG003+HG004	NovaSeq	10	TRUE	Octopus	notinAllTandemRepeatsandHomopolymers	AAaaaa	AAAAAa	331
HG002+HG003+HG004	NovaSeq	10	TRUE	Octopus	notinAllTandemRepeatsandHomopolymers	AAaaaa	AAAAaa	17264
HG002+HG003+HG004	NovaSeq	10	TRUE	Octopus	notinAllTandemRepeatsandHomopolymers	AAaaaa	AAAaaa	118416
HG002+HG003+HG004	NovaSeq	10	TRUE	Octopus	notinAllTandemRepeatsandHomopolymers	AAaaaa	Aaaaaa	108851
HG002+HG003+HG004	NovaSeq	10	TRUE	Octopus	notinAllTandemRepeatsandHomopolymers	AAaaaa	aaaaaa	16809
HG002+HG003+HG004	NovaSeq	10	TRUE	Octopus	notinAllTandemRepeatsandHomopolymers	Aaaaaa	AAAAAa	5
HG002+HG003+HG004	NovaSeq	10	TRUE	Octopus	notinAllTandemRepeatsandHomopolymers	Aaaaaa	AAAAaa	703
HG002+HG003+HG004	NovaSeq	10	TRUE	Octopus	notinAllTandemRepeatsandHomopolymers	Aaaaaa	AAAaaa	8274
HG002+HG003+HG004	NovaSeq	10	TRUE	Octopus	notinAllTandemRepeatsandHomopolymers	Aaaaaa	AAaaaa	78154
HG002+HG003+HG004	NovaSeq	10	TRUE	Octopus	notinAllTandemRepeatsandHomopolymers	Aaaaaa	aaaaaa	64162
HG002+HG003+HG004	NovaSeq	10	TRUE	Octopus	notinAllTandemRepeatsandHomopolymers	aaaaaa	AAAAAa	1
HG002+HG003+HG004	NovaSeq	10	TRUE	Octopus	notinAllTandemRepeatsandHomopolymers	aaaaaa	AAAAaa	10
HG002+HG003+HG004	NovaSeq	10	TRUE	Octopus	notinAllTandemRepeatsandHomopolymers	aaaaaa	AAAaaa	61
HG002+HG003+HG004	NovaSeq	10	TRUE	Octopus	notinAllTandemRepeatsandHomopolymers	aaaaaa	AAaaaa	190
HG002+HG003+HG004	NovaSeq	10	TRUE	Octopus	notinAllTandemRepeatsandHomopolymers	aaaaaa	Aaaaaa	5333
HG002+HG003+HG004	NovaSeq	10	TRUE	Octopus	notinalldifficult	AAAAAa	AAAAaa	162710
HG002+HG003+HG004	NovaSeq	10	TRUE	Octopus	notinalldifficult	AAAAAa	AAAaaa	19590
HG002+HG003+HG004	NovaSeq	10	TRUE	Octopus	notinalldifficult	AAAAAa	AAaaaa	1926
HG002+HG003+HG004	NovaSeq	10	TRUE	Octopus	notinalldifficult	AAAAAa	Aaaaaa	83
HG002+HG003+HG004	NovaSeq	10	TRUE	Octopus	notinalldifficult	AAAAAa	aaaaaa	117
HG002+HG003+HG004	NovaSeq	10	TRUE	Octopus	notinalldifficult	AAAAaa	AAAAAa	66016
HG002+HG003+HG004	NovaSeq	10	TRUE	Octopus	notinalldifficult	AAAAaa	AAAaaa	216343
HG002+HG003+HG004	NovaSeq	10	TRUE	Octopus	notinalldifficult	AAAAaa	AAaaaa	35131
HG002+HG003+HG004	NovaSeq	10	TRUE	Octopus	notinalldifficult	AAAAaa	Aaaaaa	2697
HG002+HG003+HG004	NovaSeq	10	TRUE	Octopus	notinalldifficult	AAAAaa	aaaaaa	942
HG002+HG003+HG004	NovaSeq	10	TRUE	Octopus	notinalldifficult	AAAaaa	AAAAAa	5751
HG002+HG003+HG004	NovaSeq	10	TRUE	Octopus	notinalldifficult	AAAaaa	AAAAaa	125737
HG002+HG003+HG004	NovaSeq	10	TRUE	Octopus	notinalldifficult	AAAaaa	AAaaaa	134872
HG002+HG003+HG004	NovaSeq	10	TRUE	Octopus	notinalldifficult	AAAaaa	Aaaaaa	18584
HG002+HG003+HG004	NovaSeq	10	TRUE	Octopus	notinalldifficult	AAAaaa	aaaaaa	3224
HG002+HG003+HG004	NovaSeq	10	TRUE	Octopus	notinalldifficult	AAaaaa	AAAAAa	279
HG002+HG003+HG004	NovaSeq	10	TRUE	Octopus	notinalldifficult	AAaaaa	AAAAaa	14723
HG002+HG003+HG004	NovaSeq	10	TRUE	Octopus	notinalldifficult	AAaaaa	AAAaaa	102782
HG002+HG003+HG004	NovaSeq	10	TRUE	Octopus	notinalldifficult	AAaaaa	Aaaaaa	96099
HG002+HG003+HG004	NovaSeq	10	TRUE	Octopus	notinalldifficult	AAaaaa	aaaaaa	14380
HG002+HG003+HG004	NovaSeq	10	TRUE	Octopus	notinalldifficult	Aaaaaa	AAAAAa	3
HG002+HG003+HG004	NovaSeq	10	TRUE	Octopus	notinalldifficult	Aaaaaa	AAAAaa	527
HG002+HG003+HG004	NovaSeq	10	TRUE	Octopus	notinalldifficult	Aaaaaa	AAAaaa	6848
HG002+HG003+HG004	NovaSeq	10	TRUE	Octopus	notinalldifficult	Aaaaaa	AAaaaa	67265
HG002+HG003+HG004	NovaSeq	10	TRUE	Octopus	notinalldifficult	Aaaaaa	aaaaaa	55162
HG002+HG003+HG004	NovaSeq	10	TRUE	Octopus	notinalldifficult	aaaaaa	AAAaaa	2
HG002+HG003+HG004	NovaSeq	10	TRUE	Octopus	notinalldifficult	aaaaaa	AAaaaa	37
HG002+HG003+HG004	NovaSeq	10	TRUE	Octopus	notinalldifficult	aaaaaa	Aaaaaa	4345
HG002+HG003+HG004	NovaSeq	10	TRUE	Octopus	notinalllowmapandsegdup	AAAAAa	AAAAaa	193074
HG002+HG003+HG004	NovaSeq	10	TRUE	Octopus	notinalllowmapandsegdup	AAAAAa	AAAaaa	23901
HG002+HG003+HG004	NovaSeq	10	TRUE	Octopus	notinalllowmapandsegdup	AAAAAa	AAaaaa	2387
HG002+HG003+HG004	NovaSeq	10	TRUE	Octopus	notinalllowmapandsegdup	AAAAAa	Aaaaaa	114
HG002+HG003+HG004	NovaSeq	10	TRUE	Octopus	notinalllowmapandsegdup	AAAAAa	aaaaaa	181
HG002+HG003+HG004	NovaSeq	10	TRUE	Octopus	notinalllowmapandsegdup	AAAAaa	AAAAAa	80400
HG002+HG003+HG004	NovaSeq	10	TRUE	Octopus	notinalllowmapandsegdup	AAAAaa	AAAaaa	256391
HG002+HG003+HG004	NovaSeq	10	TRUE	Octopus	notinalllowmapandsegdup	AAAAaa	AAaaaa	42466
HG002+HG003+HG004	NovaSeq	10	TRUE	Octopus	notinalllowmapandsegdup	AAAAaa	Aaaaaa	3352
HG002+HG003+HG004	NovaSeq	10	TRUE	Octopus	notinalllowmapandsegdup	AAAAaa	aaaaaa	1303
HG002+HG003+HG004	NovaSeq	10	TRUE	Octopus	notinalllowmapandsegdup	AAAaaa	AAAAAa	7170
HG002+HG003+HG004	NovaSeq	10	TRUE	Octopus	notinalllowmapandsegdup	AAAaaa	AAAAaa	148744
HG002+HG003+HG004	NovaSeq	10	TRUE	Octopus	notinalllowmapandsegdup	AAAaaa	AAaaaa	159966
HG002+HG003+HG004	NovaSeq	10	TRUE	Octopus	notinalllowmapandsegdup	AAAaaa	Aaaaaa	22494
HG002+HG003+HG004	NovaSeq	10	TRUE	Octopus	notinalllowmapandsegdup	AAAaaa	aaaaaa	4246
HG002+HG003+HG004	NovaSeq	10	TRUE	Octopus	notinalllowmapandsegdup	AAaaaa	AAAAAa	376
HG002+HG003+HG004	NovaSeq	10	TRUE	Octopus	notinalllowmapandsegdup	AAaaaa	AAAAaa	17658
HG002+HG003+HG004	NovaSeq	10	TRUE	Octopus	notinalllowmapandsegdup	AAaaaa	AAAaaa	121435
HG002+HG003+HG004	NovaSeq	10	TRUE	Octopus	notinalllowmapandsegdup	AAaaaa	Aaaaaa	113619
HG002+HG003+HG004	NovaSeq	10	TRUE	Octopus	notinalllowmapandsegdup	AAaaaa	aaaaaa	17841
HG002+HG003+HG004	NovaSeq	10	TRUE	Octopus	notinalllowmapandsegdup	Aaaaaa	AAAAAa	3
HG002+HG003+HG004	NovaSeq	10	TRUE	Octopus	notinalllowmapandsegdup	Aaaaaa	AAAAaa	652
HG002+HG003+HG004	NovaSeq	10	TRUE	Octopus	notinalllowmapandsegdup	Aaaaaa	AAAaaa	8295
HG002+HG003+HG004	NovaSeq	10	TRUE	Octopus	notinalllowmapandsegdup	Aaaaaa	AAaaaa	79809
HG002+HG003+HG004	NovaSeq	10	TRUE	Octopus	notinalllowmapandsegdup	Aaaaaa	aaaaaa	66974
HG002+HG003+HG004	NovaSeq	10	TRUE	Octopus	notinalllowmapandsegdup	aaaaaa	AAAaaa	5
HG002+HG003+HG004	NovaSeq	10	TRUE	Octopus	notinalllowmapandsegdup	aaaaaa	AAaaaa	93
HG002+HG003+HG004	NovaSeq	10	TRUE	Octopus	notinalllowmapandsegdup	aaaaaa	Aaaaaa	5927
HG002+HG003+HG004	NovaSeq	20	FALSE	FreeBayes	AllTandemRepeatsandHomopolymers	AAAAAa	AAAAaa	6533
HG002+HG003+HG004	NovaSeq	20	FALSE	FreeBayes	AllTandemRepeatsandHomopolymers	AAAAAa	AAAaaa	253
HG002+HG003+HG004	NovaSeq	20	FALSE	FreeBayes	AllTandemRepeatsandHomopolymers	AAAAAa	AAaaaa	6
HG002+HG003+HG004	NovaSeq	20	FALSE	FreeBayes	AllTandemRepeatsandHomopolymers	AAAAaa	AAAAAa	9223
HG002+HG003+HG004	NovaSeq	20	FALSE	FreeBayes	AllTandemRepeatsandHomopolymers	AAAAaa	AAAaaa	8927
HG002+HG003+HG004	NovaSeq	20	FALSE	FreeBayes	AllTandemRepeatsandHomopolymers	AAAAaa	AAaaaa	589
HG002+HG003+HG004	NovaSeq	20	FALSE	FreeBayes	AllTandemRepeatsandHomopolymers	AAAAaa	Aaaaaa	7
HG002+HG003+HG004	NovaSeq	20	FALSE	FreeBayes	AllTandemRepeatsandHomopolymers	AAAaaa	AAAAAa	389
HG002+HG003+HG004	NovaSeq	20	FALSE	FreeBayes	AllTandemRepeatsandHomopolymers	AAAaaa	AAAAaa	5865
HG002+HG003+HG004	NovaSeq	20	FALSE	FreeBayes	AllTandemRepeatsandHomopolymers	AAAaaa	AAaaaa	5547
HG002+HG003+HG004	NovaSeq	20	FALSE	FreeBayes	AllTandemRepeatsandHomopolymers	AAAaaa	Aaaaaa	325
HG002+HG003+HG004	NovaSeq	20	FALSE	FreeBayes	AllTandemRepeatsandHomopolymers	AAAaaa	aaaaaa	1
HG002+HG003+HG004	NovaSeq	20	FALSE	FreeBayes	AllTandemRepeatsandHomopolymers	AAaaaa	AAAAAa	8
HG002+HG003+HG004	NovaSeq	20	FALSE	FreeBayes	AllTandemRepeatsandHomopolymers	AAaaaa	AAAAaa	321
HG002+HG003+HG004	NovaSeq	20	FALSE	FreeBayes	AllTandemRepeatsandHomopolymers	AAaaaa	AAAaaa	4274
HG002+HG003+HG004	NovaSeq	20	FALSE	FreeBayes	AllTandemRepeatsandHomopolymers	AAaaaa	Aaaaaa	4028
HG002+HG003+HG004	NovaSeq	20	FALSE	FreeBayes	AllTandemRepeatsandHomopolymers	AAaaaa	aaaaaa	19
HG002+HG003+HG004	NovaSeq	20	FALSE	FreeBayes	AllTandemRepeatsandHomopolymers	Aaaaaa	AAAAAa	1
HG002+HG003+HG004	NovaSeq	20	FALSE	FreeBayes	AllTandemRepeatsandHomopolymers	Aaaaaa	AAAAaa	6
HG002+HG003+HG004	NovaSeq	20	FALSE	FreeBayes	AllTandemRepeatsandHomopolymers	Aaaaaa	AAAaaa	116
HG002+HG003+HG004	NovaSeq	20	FALSE	FreeBayes	AllTandemRepeatsandHomopolymers	Aaaaaa	AAaaaa	2601
HG002+HG003+HG004	NovaSeq	20	FALSE	FreeBayes	AllTandemRepeatsandHomopolymers	Aaaaaa	aaaaaa	491
HG002+HG003+HG004	NovaSeq	20	FALSE	FreeBayes	AllTandemRepeatsandHomopolymers	aaaaaa	AAAAaa	1
HG002+HG003+HG004	NovaSeq	20	FALSE	FreeBayes	AllTandemRepeatsandHomopolymers	aaaaaa	AAAaaa	5
HG002+HG003+HG004	NovaSeq	20	FALSE	FreeBayes	AllTandemRepeatsandHomopolymers	aaaaaa	AAaaaa	13
HG002+HG003+HG004	NovaSeq	20	FALSE	FreeBayes	AllTandemRepeatsandHomopolymers	aaaaaa	Aaaaaa	745
HG002+HG003+HG004	NovaSeq	20	FALSE	FreeBayes	alldifficult	AAAAAa	AAAAaa	24844
HG002+HG003+HG004	NovaSeq	20	FALSE	FreeBayes	alldifficult	AAAAAa	AAAaaa	1026
HG002+HG003+HG004	NovaSeq	20	FALSE	FreeBayes	alldifficult	AAAAAa	AAaaaa	39
HG002+HG003+HG004	NovaSeq	20	FALSE	FreeBayes	alldifficult	AAAAAa	Aaaaaa	2
HG002+HG003+HG004	NovaSeq	20	FALSE	FreeBayes	alldifficult	AAAAAa	aaaaaa	4
HG002+HG003+HG004	NovaSeq	20	FALSE	FreeBayes	alldifficult	AAAAaa	AAAAAa	38262
HG002+HG003+HG004	NovaSeq	20	FALSE	FreeBayes	alldifficult	AAAAaa	AAAaaa	32862
HG002+HG003+HG004	NovaSeq	20	FALSE	FreeBayes	alldifficult	AAAAaa	AAaaaa	2188
HG002+HG003+HG004	NovaSeq	20	FALSE	FreeBayes	alldifficult	AAAAaa	Aaaaaa	57
HG002+HG003+HG004	NovaSeq	20	FALSE	FreeBayes	alldifficult	AAAAaa	aaaaaa	20
HG002+HG003+HG004	NovaSeq	20	FALSE	FreeBayes	alldifficult	AAAaaa	AAAAAa	2905
HG002+HG003+HG004	NovaSeq	20	FALSE	FreeBayes	alldifficult	AAAaaa	AAAAaa	25784
HG002+HG003+HG004	NovaSeq	20	FALSE	FreeBayes	alldifficult	AAAaaa	AAaaaa	20647
HG002+HG003+HG004	NovaSeq	20	FALSE	FreeBayes	alldifficult	AAAaaa	Aaaaaa	1232
HG002+HG003+HG004	NovaSeq	20	FALSE	FreeBayes	alldifficult	AAAaaa	aaaaaa	39
HG002+HG003+HG004	NovaSeq	20	FALSE	FreeBayes	alldifficult	AAaaaa	AAAAAa	380
HG002+HG003+HG004	NovaSeq	20	FALSE	FreeBayes	alldifficult	AAaaaa	AAAAaa	2657
HG002+HG003+HG004	NovaSeq	20	FALSE	FreeBayes	alldifficult	AAaaaa	AAAaaa	18655
HG002+HG003+HG004	NovaSeq	20	FALSE	FreeBayes	alldifficult	AAaaaa	Aaaaaa	15018
HG002+HG003+HG004	NovaSeq	20	FALSE	FreeBayes	alldifficult	AAaaaa	aaaaaa	154
HG002+HG003+HG004	NovaSeq	20	FALSE	FreeBayes	alldifficult	Aaaaaa	AAAAAa	46
HG002+HG003+HG004	NovaSeq	20	FALSE	FreeBayes	alldifficult	Aaaaaa	AAAAaa	361
HG002+HG003+HG004	NovaSeq	20	FALSE	FreeBayes	alldifficult	Aaaaaa	AAAaaa	1345
HG002+HG003+HG004	NovaSeq	20	FALSE	FreeBayes	alldifficult	Aaaaaa	AAaaaa	11885
HG002+HG003+HG004	NovaSeq	20	FALSE	FreeBayes	alldifficult	Aaaaaa	aaaaaa	2132
HG002+HG003+HG004	NovaSeq	20	FALSE	FreeBayes	alldifficult	aaaaaa	AAAAAa	11
HG002+HG003+HG004	NovaSeq	20	FALSE	FreeBayes	alldifficult	aaaaaa	AAAAaa	77
HG002+HG003+HG004	NovaSeq	20	FALSE	FreeBayes	alldifficult	aaaaaa	AAAaaa	178
HG002+HG003+HG004	NovaSeq	20	FALSE	FreeBayes	alldifficult	aaaaaa	AAaaaa	423
HG002+HG003+HG004	NovaSeq	20	FALSE	FreeBayes	alldifficult	aaaaaa	Aaaaaa	3085
HG002+HG003+HG004	NovaSeq	20	FALSE	FreeBayes	alllowmapandsegdup	AAAAAa	AAAAaa	9896
HG002+HG003+HG004	NovaSeq	20	FALSE	FreeBayes	alllowmapandsegdup	AAAAAa	AAAaaa	452
HG002+HG003+HG004	NovaSeq	20	FALSE	FreeBayes	alllowmapandsegdup	AAAAAa	AAaaaa	24
HG002+HG003+HG004	NovaSeq	20	FALSE	FreeBayes	alllowmapandsegdup	AAAAAa	Aaaaaa	2
HG002+HG003+HG004	NovaSeq	20	FALSE	FreeBayes	alllowmapandsegdup	AAAAAa	aaaaaa	4
HG002+HG003+HG004	NovaSeq	20	FALSE	FreeBayes	alllowmapandsegdup	AAAAaa	AAAAAa	16754
HG002+HG003+HG004	NovaSeq	20	FALSE	FreeBayes	alllowmapandsegdup	AAAAaa	AAAaaa	11874
HG002+HG003+HG004	NovaSeq	20	FALSE	FreeBayes	alllowmapandsegdup	AAAAaa	AAaaaa	857
HG002+HG003+HG004	NovaSeq	20	FALSE	FreeBayes	alllowmapandsegdup	AAAAaa	Aaaaaa	36
HG002+HG003+HG004	NovaSeq	20	FALSE	FreeBayes	alllowmapandsegdup	AAAAaa	aaaaaa	19
HG002+HG003+HG004	NovaSeq	20	FALSE	FreeBayes	alllowmapandsegdup	AAAaaa	AAAAAa	2045
HG002+HG003+HG004	NovaSeq	20	FALSE	FreeBayes	alllowmapandsegdup	AAAaaa	AAAAaa	11900
HG002+HG003+HG004	NovaSeq	20	FALSE	FreeBayes	alllowmapandsegdup	AAAaaa	AAaaaa	7505
HG002+HG003+HG004	NovaSeq	20	FALSE	FreeBayes	alllowmapandsegdup	AAAaaa	Aaaaaa	453
HG002+HG003+HG004	NovaSeq	20	FALSE	FreeBayes	alllowmapandsegdup	AAAaaa	aaaaaa	35
HG002+HG003+HG004	NovaSeq	20	FALSE	FreeBayes	alllowmapandsegdup	AAaaaa	AAAAAa	350
HG002+HG003+HG004	NovaSeq	20	FALSE	FreeBayes	alllowmapandsegdup	AAaaaa	AAAAaa	1884
HG002+HG003+HG004	NovaSeq	20	FALSE	FreeBayes	alllowmapandsegdup	AAaaaa	AAAaaa	8448
HG002+HG003+HG004	NovaSeq	20	FALSE	FreeBayes	alllowmapandsegdup	AAaaaa	Aaaaaa	5177
HG002+HG003+HG004	NovaSeq	20	FALSE	FreeBayes	alllowmapandsegdup	AAaaaa	aaaaaa	107
HG002+HG003+HG004	NovaSeq	20	FALSE	FreeBayes	alllowmapandsegdup	Aaaaaa	AAAAAa	42
HG002+HG003+HG004	NovaSeq	20	FALSE	FreeBayes	alllowmapandsegdup	Aaaaaa	AAAAaa	351
HG002+HG003+HG004	NovaSeq	20	FALSE	FreeBayes	alllowmapandsegdup	Aaaaaa	AAAaaa	1048
HG002+HG003+HG004	NovaSeq	20	FALSE	FreeBayes	alllowmapandsegdup	Aaaaaa	AAaaaa	5780
HG002+HG003+HG004	NovaSeq	20	FALSE	FreeBayes	alllowmapandsegdup	Aaaaaa	aaaaaa	1034
HG002+HG003+HG004	NovaSeq	20	FALSE	FreeBayes	alllowmapandsegdup	aaaaaa	AAAAAa	11
HG002+HG003+HG004	NovaSeq	20	FALSE	FreeBayes	alllowmapandsegdup	aaaaaa	AAAAaa	76
HG002+HG003+HG004	NovaSeq	20	FALSE	FreeBayes	alllowmapandsegdup	aaaaaa	AAAaaa	175
HG002+HG003+HG004	NovaSeq	20	FALSE	FreeBayes	alllowmapandsegdup	aaaaaa	AAaaaa	409
HG002+HG003+HG004	NovaSeq	20	FALSE	FreeBayes	alllowmapandsegdup	aaaaaa	Aaaaaa	1757
HG002+HG003+HG004	NovaSeq	20	FALSE	FreeBayes	genome	AAAAAa	AAAAaa	152704
HG002+HG003+HG004	NovaSeq	20	FALSE	FreeBayes	genome	AAAAAa	AAAaaa	5543
HG002+HG003+HG004	NovaSeq	20	FALSE	FreeBayes	genome	AAAAAa	AAaaaa	111
HG002+HG003+HG004	NovaSeq	20	FALSE	FreeBayes	genome	AAAAAa	Aaaaaa	4
HG002+HG003+HG004	NovaSeq	20	FALSE	FreeBayes	genome	AAAAAa	aaaaaa	4
HG002+HG003+HG004	NovaSeq	20	FALSE	FreeBayes	genome	AAAAaa	AAAAAa	217682
HG002+HG003+HG004	NovaSeq	20	FALSE	FreeBayes	genome	AAAAaa	AAAaaa	213678
HG002+HG003+HG004	NovaSeq	20	FALSE	FreeBayes	genome	AAAAaa	AAaaaa	13223
HG002+HG003+HG004	NovaSeq	20	FALSE	FreeBayes	genome	AAAAaa	Aaaaaa	241
HG002+HG003+HG004	NovaSeq	20	FALSE	FreeBayes	genome	AAAAaa	aaaaaa	22
HG002+HG003+HG004	NovaSeq	20	FALSE	FreeBayes	genome	AAAaaa	AAAAAa	9851
HG002+HG003+HG004	NovaSeq	20	FALSE	FreeBayes	genome	AAAaaa	AAAAaa	146004
HG002+HG003+HG004	NovaSeq	20	FALSE	FreeBayes	genome	AAAaaa	AAaaaa	137563
HG002+HG003+HG004	NovaSeq	20	FALSE	FreeBayes	genome	AAAaaa	Aaaaaa	7872
HG002+HG003+HG004	NovaSeq	20	FALSE	FreeBayes	genome	AAAaaa	aaaaaa	56
HG002+HG003+HG004	NovaSeq	20	FALSE	FreeBayes	genome	AAaaaa	AAAAAa	491
HG002+HG003+HG004	NovaSeq	20	FALSE	FreeBayes	genome	AAaaaa	AAAAaa	8632
HG002+HG003+HG004	NovaSeq	20	FALSE	FreeBayes	genome	AAaaaa	AAAaaa	108591
HG002+HG003+HG004	NovaSeq	20	FALSE	FreeBayes	genome	AAaaaa	Aaaaaa	100650
HG002+HG003+HG004	NovaSeq	20	FALSE	FreeBayes	genome	AAaaaa	aaaaaa	619
HG002+HG003+HG004	NovaSeq	20	FALSE	FreeBayes	genome	Aaaaaa	AAAAAa	47
HG002+HG003+HG004	NovaSeq	20	FALSE	FreeBayes	genome	Aaaaaa	AAAAaa	392
HG002+HG003+HG004	NovaSeq	20	FALSE	FreeBayes	genome	Aaaaaa	AAAaaa	3263
HG002+HG003+HG004	NovaSeq	20	FALSE	FreeBayes	genome	Aaaaaa	AAaaaa	63387
HG002+HG003+HG004	NovaSeq	20	FALSE	FreeBayes	genome	Aaaaaa	aaaaaa	11183
HG002+HG003+HG004	NovaSeq	20	FALSE	FreeBayes	genome	aaaaaa	AAAAAa	12
HG002+HG003+HG004	NovaSeq	20	FALSE	FreeBayes	genome	aaaaaa	AAAAaa	79
HG002+HG003+HG004	NovaSeq	20	FALSE	FreeBayes	genome	aaaaaa	AAAaaa	182
HG002+HG003+HG004	NovaSeq	20	FALSE	FreeBayes	genome	aaaaaa	AAaaaa	445
HG002+HG003+HG004	NovaSeq	20	FALSE	FreeBayes	genome	aaaaaa	Aaaaaa	11906
HG002+HG003+HG004	NovaSeq	20	FALSE	FreeBayes	notinAllTandemRepeatsandHomopolymers	AAAAAa	AAAAaa	146171
HG002+HG003+HG004	NovaSeq	20	FALSE	FreeBayes	notinAllTandemRepeatsandHomopolymers	AAAAAa	AAAaaa	5290
HG002+HG003+HG004	NovaSeq	20	FALSE	FreeBayes	notinAllTandemRepeatsandHomopolymers	AAAAAa	AAaaaa	105
HG002+HG003+HG004	NovaSeq	20	FALSE	FreeBayes	notinAllTandemRepeatsandHomopolymers	AAAAAa	Aaaaaa	4
HG002+HG003+HG004	NovaSeq	20	FALSE	FreeBayes	notinAllTandemRepeatsandHomopolymers	AAAAAa	aaaaaa	4
HG002+HG003+HG004	NovaSeq	20	FALSE	FreeBayes	notinAllTandemRepeatsandHomopolymers	AAAAaa	AAAAAa	208459
HG002+HG003+HG004	NovaSeq	20	FALSE	FreeBayes	notinAllTandemRepeatsandHomopolymers	AAAAaa	AAAaaa	204751
HG002+HG003+HG004	NovaSeq	20	FALSE	FreeBayes	notinAllTandemRepeatsandHomopolymers	AAAAaa	AAaaaa	12634
HG002+HG003+HG004	NovaSeq	20	FALSE	FreeBayes	notinAllTandemRepeatsandHomopolymers	AAAAaa	Aaaaaa	234
HG002+HG003+HG004	NovaSeq	20	FALSE	FreeBayes	notinAllTandemRepeatsandHomopolymers	AAAAaa	aaaaaa	22
HG002+HG003+HG004	NovaSeq	20	FALSE	FreeBayes	notinAllTandemRepeatsandHomopolymers	AAAaaa	AAAAAa	9462
HG002+HG003+HG004	NovaSeq	20	FALSE	FreeBayes	notinAllTandemRepeatsandHomopolymers	AAAaaa	AAAAaa	140139
HG002+HG003+HG004	NovaSeq	20	FALSE	FreeBayes	notinAllTandemRepeatsandHomopolymers	AAAaaa	AAaaaa	132016
HG002+HG003+HG004	NovaSeq	20	FALSE	FreeBayes	notinAllTandemRepeatsandHomopolymers	AAAaaa	Aaaaaa	7547
HG002+HG003+HG004	NovaSeq	20	FALSE	FreeBayes	notinAllTandemRepeatsandHomopolymers	AAAaaa	aaaaaa	55
HG002+HG003+HG004	NovaSeq	20	FALSE	FreeBayes	notinAllTandemRepeatsandHomopolymers	AAaaaa	AAAAAa	483
HG002+HG003+HG004	NovaSeq	20	FALSE	FreeBayes	notinAllTandemRepeatsandHomopolymers	AAaaaa	AAAAaa	8311
HG002+HG003+HG004	NovaSeq	20	FALSE	FreeBayes	notinAllTandemRepeatsandHomopolymers	AAaaaa	AAAaaa	104317
HG002+HG003+HG004	NovaSeq	20	FALSE	FreeBayes	notinAllTandemRepeatsandHomopolymers	AAaaaa	Aaaaaa	96622
HG002+HG003+HG004	NovaSeq	20	FALSE	FreeBayes	notinAllTandemRepeatsandHomopolymers	AAaaaa	aaaaaa	600
HG002+HG003+HG004	NovaSeq	20	FALSE	FreeBayes	notinAllTandemRepeatsandHomopolymers	Aaaaaa	AAAAAa	46
HG002+HG003+HG004	NovaSeq	20	FALSE	FreeBayes	notinAllTandemRepeatsandHomopolymers	Aaaaaa	AAAAaa	386
HG002+HG003+HG004	NovaSeq	20	FALSE	FreeBayes	notinAllTandemRepeatsandHomopolymers	Aaaaaa	AAAaaa	3147
HG002+HG003+HG004	NovaSeq	20	FALSE	FreeBayes	notinAllTandemRepeatsandHomopolymers	Aaaaaa	AAaaaa	60786
HG002+HG003+HG004	NovaSeq	20	FALSE	FreeBayes	notinAllTandemRepeatsandHomopolymers	Aaaaaa	aaaaaa	10692
HG002+HG003+HG004	NovaSeq	20	FALSE	FreeBayes	notinAllTandemRepeatsandHomopolymers	aaaaaa	AAAAAa	12
HG002+HG003+HG004	NovaSeq	20	FALSE	FreeBayes	notinAllTandemRepeatsandHomopolymers	aaaaaa	AAAAaa	78
HG002+HG003+HG004	NovaSeq	20	FALSE	FreeBayes	notinAllTandemRepeatsandHomopolymers	aaaaaa	AAAaaa	177
HG002+HG003+HG004	NovaSeq	20	FALSE	FreeBayes	notinAllTandemRepeatsandHomopolymers	aaaaaa	AAaaaa	432
HG002+HG003+HG004	NovaSeq	20	FALSE	FreeBayes	notinAllTandemRepeatsandHomopolymers	aaaaaa	Aaaaaa	11161
HG002+HG003+HG004	NovaSeq	20	FALSE	FreeBayes	notinalldifficult	AAAAAa	AAAAaa	127860
HG002+HG003+HG004	NovaSeq	20	FALSE	FreeBayes	notinalldifficult	AAAAAa	AAAaaa	4517
HG002+HG003+HG004	NovaSeq	20	FALSE	FreeBayes	notinalldifficult	AAAAAa	AAaaaa	72
HG002+HG003+HG004	NovaSeq	20	FALSE	FreeBayes	notinalldifficult	AAAAAa	Aaaaaa	2
HG002+HG003+HG004	NovaSeq	20	FALSE	FreeBayes	notinalldifficult	AAAAaa	AAAAAa	179420
HG002+HG003+HG004	NovaSeq	20	FALSE	FreeBayes	notinalldifficult	AAAAaa	AAAaaa	180816
HG002+HG003+HG004	NovaSeq	20	FALSE	FreeBayes	notinalldifficult	AAAAaa	AAaaaa	11035
HG002+HG003+HG004	NovaSeq	20	FALSE	FreeBayes	notinalldifficult	AAAAaa	Aaaaaa	184
HG002+HG003+HG004	NovaSeq	20	FALSE	FreeBayes	notinalldifficult	AAAAaa	aaaaaa	2
HG002+HG003+HG004	NovaSeq	20	FALSE	FreeBayes	notinalldifficult	AAAaaa	AAAAAa	6946
HG002+HG003+HG004	NovaSeq	20	FALSE	FreeBayes	notinalldifficult	AAAaaa	AAAAaa	120220
HG002+HG003+HG004	NovaSeq	20	FALSE	FreeBayes	notinalldifficult	AAAaaa	AAaaaa	116916
HG002+HG003+HG004	NovaSeq	20	FALSE	FreeBayes	notinalldifficult	AAAaaa	Aaaaaa	6640
HG002+HG003+HG004	NovaSeq	20	FALSE	FreeBayes	notinalldifficult	AAAaaa	aaaaaa	17
HG002+HG003+HG004	NovaSeq	20	FALSE	FreeBayes	notinalldifficult	AAaaaa	AAAAAa	111
HG002+HG003+HG004	NovaSeq	20	FALSE	FreeBayes	notinalldifficult	AAaaaa	AAAAaa	5975
HG002+HG003+HG004	NovaSeq	20	FALSE	FreeBayes	notinalldifficult	AAaaaa	AAAaaa	89936
HG002+HG003+HG004	NovaSeq	20	FALSE	FreeBayes	notinalldifficult	AAaaaa	Aaaaaa	85632
HG002+HG003+HG004	NovaSeq	20	FALSE	FreeBayes	notinalldifficult	AAaaaa	aaaaaa	465
HG002+HG003+HG004	NovaSeq	20	FALSE	FreeBayes	notinalldifficult	Aaaaaa	AAAAAa	1
HG002+HG003+HG004	NovaSeq	20	FALSE	FreeBayes	notinalldifficult	Aaaaaa	AAAAaa	31
HG002+HG003+HG004	NovaSeq	20	FALSE	FreeBayes	notinalldifficult	Aaaaaa	AAAaaa	1918
HG002+HG003+HG004	NovaSeq	20	FALSE	FreeBayes	notinalldifficult	Aaaaaa	AAaaaa	51502
HG002+HG003+HG004	NovaSeq	20	FALSE	FreeBayes	notinalldifficult	Aaaaaa	aaaaaa	9051
HG002+HG003+HG004	NovaSeq	20	FALSE	FreeBayes	notinalldifficult	aaaaaa	AAAAAa	1
HG002+HG003+HG004	NovaSeq	20	FALSE	FreeBayes	notinalldifficult	aaaaaa	AAAAaa	2
HG002+HG003+HG004	NovaSeq	20	FALSE	FreeBayes	notinalldifficult	aaaaaa	AAAaaa	4
HG002+HG003+HG004	NovaSeq	20	FALSE	FreeBayes	notinalldifficult	aaaaaa	AAaaaa	22
HG002+HG003+HG004	NovaSeq	20	FALSE	FreeBayes	notinalldifficult	aaaaaa	Aaaaaa	8821
HG002+HG003+HG004	NovaSeq	20	FALSE	FreeBayes	notinalllowmapandsegdup	AAAAAa	AAAAaa	142808
HG002+HG003+HG004	NovaSeq	20	FALSE	FreeBayes	notinalllowmapandsegdup	AAAAAa	AAAaaa	5091
HG002+HG003+HG004	NovaSeq	20	FALSE	FreeBayes	notinalllowmapandsegdup	AAAAAa	AAaaaa	87
HG002+HG003+HG004	NovaSeq	20	FALSE	FreeBayes	notinalllowmapandsegdup	AAAAAa	Aaaaaa	2
HG002+HG003+HG004	NovaSeq	20	FALSE	FreeBayes	notinalllowmapandsegdup	AAAAaa	AAAAAa	200928
HG002+HG003+HG004	NovaSeq	20	FALSE	FreeBayes	notinalllowmapandsegdup	AAAAaa	AAAaaa	201804
HG002+HG003+HG004	NovaSeq	20	FALSE	FreeBayes	notinalllowmapandsegdup	AAAAaa	AAaaaa	12366
HG002+HG003+HG004	NovaSeq	20	FALSE	FreeBayes	notinalllowmapandsegdup	AAAAaa	Aaaaaa	205
HG002+HG003+HG004	NovaSeq	20	FALSE	FreeBayes	notinalllowmapandsegdup	AAAAaa	aaaaaa	3
HG002+HG003+HG004	NovaSeq	20	FALSE	FreeBayes	notinalllowmapandsegdup	AAAaaa	AAAAAa	7806
HG002+HG003+HG004	NovaSeq	20	FALSE	FreeBayes	notinalllowmapandsegdup	AAAaaa	AAAAaa	134104
HG002+HG003+HG004	NovaSeq	20	FALSE	FreeBayes	notinalllowmapandsegdup	AAAaaa	AAaaaa	130058
HG002+HG003+HG004	NovaSeq	20	FALSE	FreeBayes	notinalllowmapandsegdup	AAAaaa	Aaaaaa	7419
HG002+HG003+HG004	NovaSeq	20	FALSE	FreeBayes	notinalllowmapandsegdup	AAAaaa	aaaaaa	21
HG002+HG003+HG004	NovaSeq	20	FALSE	FreeBayes	notinalllowmapandsegdup	AAaaaa	AAAAAa	141
HG002+HG003+HG004	NovaSeq	20	FALSE	FreeBayes	notinalllowmapandsegdup	AAaaaa	AAAAaa	6748
HG002+HG003+HG004	NovaSeq	20	FALSE	FreeBayes	notinalllowmapandsegdup	AAaaaa	AAAaaa	100143
HG002+HG003+HG004	NovaSeq	20	FALSE	FreeBayes	notinalllowmapandsegdup	AAaaaa	Aaaaaa	95473
HG002+HG003+HG004	NovaSeq	20	FALSE	FreeBayes	notinalllowmapandsegdup	AAaaaa	aaaaaa	512
HG002+HG003+HG004	NovaSeq	20	FALSE	FreeBayes	notinalllowmapandsegdup	Aaaaaa	AAAAAa	5
HG002+HG003+HG004	NovaSeq	20	FALSE	FreeBayes	notinalllowmapandsegdup	Aaaaaa	AAAAaa	41
HG002+HG003+HG004	NovaSeq	20	FALSE	FreeBayes	notinalllowmapandsegdup	Aaaaaa	AAAaaa	2215
HG002+HG003+HG004	NovaSeq	20	FALSE	FreeBayes	notinalllowmapandsegdup	Aaaaaa	AAaaaa	57607
HG002+HG003+HG004	NovaSeq	20	FALSE	FreeBayes	notinalllowmapandsegdup	Aaaaaa	aaaaaa	10149
HG002+HG003+HG004	NovaSeq	20	FALSE	FreeBayes	notinalllowmapandsegdup	aaaaaa	AAAAAa	1
HG002+HG003+HG004	NovaSeq	20	FALSE	FreeBayes	notinalllowmapandsegdup	aaaaaa	AAAAaa	3
HG002+HG003+HG004	NovaSeq	20	FALSE	FreeBayes	notinalllowmapandsegdup	aaaaaa	AAAaaa	7
HG002+HG003+HG004	NovaSeq	20	FALSE	FreeBayes	notinalllowmapandsegdup	aaaaaa	AAaaaa	36
HG002+HG003+HG004	NovaSeq	20	FALSE	FreeBayes	notinalllowmapandsegdup	aaaaaa	Aaaaaa	10149
HG002+HG003+HG004	NovaSeq	20	FALSE	GATK4	AllTandemRepeatsandHomopolymers	AAAAAa	AAAAaa	17145
HG002+HG003+HG004	NovaSeq	20	FALSE	GATK4	AllTandemRepeatsandHomopolymers	AAAAAa	AAAaaa	884
HG002+HG003+HG004	NovaSeq	20	FALSE	GATK4	AllTandemRepeatsandHomopolymers	AAAAAa	AAaaaa	31
HG002+HG003+HG004	NovaSeq	20	FALSE	GATK4	AllTandemRepeatsandHomopolymers	AAAAAa	aaaaaa	1
HG002+HG003+HG004	NovaSeq	20	FALSE	GATK4	AllTandemRepeatsandHomopolymers	AAAAaa	AAAAAa	27373
HG002+HG003+HG004	NovaSeq	20	FALSE	GATK4	AllTandemRepeatsandHomopolymers	AAAAaa	AAAaaa	22931
HG002+HG003+HG004	NovaSeq	20	FALSE	GATK4	AllTandemRepeatsandHomopolymers	AAAAaa	AAaaaa	1889
HG002+HG003+HG004	NovaSeq	20	FALSE	GATK4	AllTandemRepeatsandHomopolymers	AAAAaa	Aaaaaa	87
HG002+HG003+HG004	NovaSeq	20	FALSE	GATK4	AllTandemRepeatsandHomopolymers	AAAAaa	aaaaaa	4
HG002+HG003+HG004	NovaSeq	20	FALSE	GATK4	AllTandemRepeatsandHomopolymers	AAAaaa	AAAAAa	1826
HG002+HG003+HG004	NovaSeq	20	FALSE	GATK4	AllTandemRepeatsandHomopolymers	AAAaaa	AAAAaa	18076
HG002+HG003+HG004	NovaSeq	20	FALSE	GATK4	AllTandemRepeatsandHomopolymers	AAAaaa	AAaaaa	14707
HG002+HG003+HG004	NovaSeq	20	FALSE	GATK4	AllTandemRepeatsandHomopolymers	AAAaaa	Aaaaaa	1313
HG002+HG003+HG004	NovaSeq	20	FALSE	GATK4	AllTandemRepeatsandHomopolymers	AAAaaa	aaaaaa	34
HG002+HG003+HG004	NovaSeq	20	FALSE	GATK4	AllTandemRepeatsandHomopolymers	AAaaaa	AAAAAa	56
HG002+HG003+HG004	NovaSeq	20	FALSE	GATK4	AllTandemRepeatsandHomopolymers	AAaaaa	AAAAaa	1314
HG002+HG003+HG004	NovaSeq	20	FALSE	GATK4	AllTandemRepeatsandHomopolymers	AAaaaa	AAAaaa	13091
HG002+HG003+HG004	NovaSeq	20	FALSE	GATK4	AllTandemRepeatsandHomopolymers	AAaaaa	Aaaaaa	11138
HG002+HG003+HG004	NovaSeq	20	FALSE	GATK4	AllTandemRepeatsandHomopolymers	AAaaaa	aaaaaa	201
HG002+HG003+HG004	NovaSeq	20	FALSE	GATK4	AllTandemRepeatsandHomopolymers	Aaaaaa	AAAAAa	3
HG002+HG003+HG004	NovaSeq	20	FALSE	GATK4	AllTandemRepeatsandHomopolymers	Aaaaaa	AAAAaa	28
HG002+HG003+HG004	NovaSeq	20	FALSE	GATK4	AllTandemRepeatsandHomopolymers	Aaaaaa	AAAaaa	536
HG002+HG003+HG004	NovaSeq	20	FALSE	GATK4	AllTandemRepeatsandHomopolymers	Aaaaaa	AAaaaa	7755
HG002+HG003+HG004	NovaSeq	20	FALSE	GATK4	AllTandemRepeatsandHomopolymers	Aaaaaa	aaaaaa	2090
HG002+HG003+HG004	NovaSeq	20	FALSE	GATK4	AllTandemRepeatsandHomopolymers	aaaaaa	AAAAaa	1
HG002+HG003+HG004	NovaSeq	20	FALSE	GATK4	AllTandemRepeatsandHomopolymers	aaaaaa	AAAaaa	11
HG002+HG003+HG004	NovaSeq	20	FALSE	GATK4	AllTandemRepeatsandHomopolymers	aaaaaa	AAaaaa	33
HG002+HG003+HG004	NovaSeq	20	FALSE	GATK4	AllTandemRepeatsandHomopolymers	aaaaaa	Aaaaaa	2722
HG002+HG003+HG004	NovaSeq	20	FALSE	GATK4	alldifficult	AAAAAa	AAAAaa	36095
HG002+HG003+HG004	NovaSeq	20	FALSE	GATK4	alldifficult	AAAAAa	AAAaaa	1615
HG002+HG003+HG004	NovaSeq	20	FALSE	GATK4	alldifficult	AAAAAa	AAaaaa	75
HG002+HG003+HG004	NovaSeq	20	FALSE	GATK4	alldifficult	AAAAAa	Aaaaaa	4
HG002+HG003+HG004	NovaSeq	20	FALSE	GATK4	alldifficult	AAAAAa	aaaaaa	16
HG002+HG003+HG004	NovaSeq	20	FALSE	GATK4	alldifficult	AAAAaa	AAAAAa	61657
HG002+HG003+HG004	NovaSeq	20	FALSE	GATK4	alldifficult	AAAAaa	AAAaaa	47640
HG002+HG003+HG004	NovaSeq	20	FALSE	GATK4	alldifficult	AAAAaa	AAaaaa	3588
HG002+HG003+HG004	NovaSeq	20	FALSE	GATK4	alldifficult	AAAAaa	Aaaaaa	170
HG002+HG003+HG004	NovaSeq	20	FALSE	GATK4	alldifficult	AAAAaa	aaaaaa	48
HG002+HG003+HG004	NovaSeq	20	FALSE	GATK4	alldifficult	AAAaaa	AAAAAa	5497
HG002+HG003+HG004	NovaSeq	20	FALSE	GATK4	alldifficult	AAAaaa	AAAAaa	41555
HG002+HG003+HG004	NovaSeq	20	FALSE	GATK4	alldifficult	AAAaaa	AAaaaa	30405
HG002+HG003+HG004	NovaSeq	20	FALSE	GATK4	alldifficult	AAAaaa	Aaaaaa	2385
HG002+HG003+HG004	NovaSeq	20	FALSE	GATK4	alldifficult	AAAaaa	aaaaaa	123
HG002+HG003+HG004	NovaSeq	20	FALSE	GATK4	alldifficult	AAaaaa	AAAAAa	766
HG002+HG003+HG004	NovaSeq	20	FALSE	GATK4	alldifficult	AAaaaa	AAAAaa	4445
HG002+HG003+HG004	NovaSeq	20	FALSE	GATK4	alldifficult	AAaaaa	AAAaaa	30318
HG002+HG003+HG004	NovaSeq	20	FALSE	GATK4	alldifficult	AAaaaa	Aaaaaa	22984
HG002+HG003+HG004	NovaSeq	20	FALSE	GATK4	alldifficult	AAaaaa	aaaaaa	434
HG002+HG003+HG004	NovaSeq	20	FALSE	GATK4	alldifficult	Aaaaaa	AAAAAa	83
HG002+HG003+HG004	NovaSeq	20	FALSE	GATK4	alldifficult	Aaaaaa	AAAAaa	511
HG002+HG003+HG004	NovaSeq	20	FALSE	GATK4	alldifficult	Aaaaaa	AAAaaa	2049
HG002+HG003+HG004	NovaSeq	20	FALSE	GATK4	alldifficult	Aaaaaa	AAaaaa	18590
HG002+HG003+HG004	NovaSeq	20	FALSE	GATK4	alldifficult	Aaaaaa	aaaaaa	4169
HG002+HG003+HG004	NovaSeq	20	FALSE	GATK4	alldifficult	aaaaaa	AAAAAa	13
HG002+HG003+HG004	NovaSeq	20	FALSE	GATK4	alldifficult	aaaaaa	AAAAaa	48
HG002+HG003+HG004	NovaSeq	20	FALSE	GATK4	alldifficult	aaaaaa	AAAaaa	131
HG002+HG003+HG004	NovaSeq	20	FALSE	GATK4	alldifficult	aaaaaa	AAaaaa	292
HG002+HG003+HG004	NovaSeq	20	FALSE	GATK4	alldifficult	aaaaaa	Aaaaaa	5033
HG002+HG003+HG004	NovaSeq	20	FALSE	GATK4	alllowmapandsegdup	AAAAAa	AAAAaa	10148
HG002+HG003+HG004	NovaSeq	20	FALSE	GATK4	alllowmapandsegdup	AAAAAa	AAAaaa	450
HG002+HG003+HG004	NovaSeq	20	FALSE	GATK4	alllowmapandsegdup	AAAAAa	AAaaaa	38
HG002+HG003+HG004	NovaSeq	20	FALSE	GATK4	alllowmapandsegdup	AAAAAa	Aaaaaa	4
HG002+HG003+HG004	NovaSeq	20	FALSE	GATK4	alllowmapandsegdup	AAAAAa	aaaaaa	13
HG002+HG003+HG004	NovaSeq	20	FALSE	GATK4	alllowmapandsegdup	AAAAaa	AAAAAa	19638
HG002+HG003+HG004	NovaSeq	20	FALSE	GATK4	alllowmapandsegdup	AAAAaa	AAAaaa	12195
HG002+HG003+HG004	NovaSeq	20	FALSE	GATK4	alllowmapandsegdup	AAAAaa	AAaaaa	947
HG002+HG003+HG004	NovaSeq	20	FALSE	GATK4	alllowmapandsegdup	AAAAaa	Aaaaaa	63
HG002+HG003+HG004	NovaSeq	20	FALSE	GATK4	alllowmapandsegdup	AAAAaa	aaaaaa	37
HG002+HG003+HG004	NovaSeq	20	FALSE	GATK4	alllowmapandsegdup	AAAaaa	AAAAAa	2949
HG002+HG003+HG004	NovaSeq	20	FALSE	GATK4	alllowmapandsegdup	AAAaaa	AAAAaa	13735
HG002+HG003+HG004	NovaSeq	20	FALSE	GATK4	alllowmapandsegdup	AAAaaa	AAaaaa	7783
HG002+HG003+HG004	NovaSeq	20	FALSE	GATK4	alllowmapandsegdup	AAAaaa	Aaaaaa	565
HG002+HG003+HG004	NovaSeq	20	FALSE	GATK4	alllowmapandsegdup	AAAaaa	aaaaaa	81
HG002+HG003+HG004	NovaSeq	20	FALSE	GATK4	alllowmapandsegdup	AAaaaa	AAAAAa	576
HG002+HG003+HG004	NovaSeq	20	FALSE	GATK4	alllowmapandsegdup	AAaaaa	AAAAaa	2413
HG002+HG003+HG004	NovaSeq	20	FALSE	GATK4	alllowmapandsegdup	AAaaaa	AAAaaa	9871
HG002+HG003+HG004	NovaSeq	20	FALSE	GATK4	alllowmapandsegdup	AAaaaa	Aaaaaa	5738
HG002+HG003+HG004	NovaSeq	20	FALSE	GATK4	alllowmapandsegdup	AAaaaa	aaaaaa	180
HG002+HG003+HG004	NovaSeq	20	FALSE	GATK4	alllowmapandsegdup	Aaaaaa	AAAAAa	76
HG002+HG003+HG004	NovaSeq	20	FALSE	GATK4	alllowmapandsegdup	Aaaaaa	AAAAaa	481
HG002+HG003+HG004	NovaSeq	20	FALSE	GATK4	alllowmapandsegdup	Aaaaaa	AAAaaa	1277
HG002+HG003+HG004	NovaSeq	20	FALSE	GATK4	alllowmapandsegdup	Aaaaaa	AAaaaa	6487
HG002+HG003+HG004	NovaSeq	20	FALSE	GATK4	alllowmapandsegdup	Aaaaaa	aaaaaa	1324
HG002+HG003+HG004	NovaSeq	20	FALSE	GATK4	alllowmapandsegdup	aaaaaa	AAAAAa	13
HG002+HG003+HG004	NovaSeq	20	FALSE	GATK4	alllowmapandsegdup	aaaaaa	AAAAaa	48
HG002+HG003+HG004	NovaSeq	20	FALSE	GATK4	alllowmapandsegdup	aaaaaa	AAAaaa	126
HG002+HG003+HG004	NovaSeq	20	FALSE	GATK4	alllowmapandsegdup	aaaaaa	AAaaaa	258
HG002+HG003+HG004	NovaSeq	20	FALSE	GATK4	alllowmapandsegdup	aaaaaa	Aaaaaa	1732
HG002+HG003+HG004	NovaSeq	20	FALSE	GATK4	genome	AAAAAa	AAAAaa	166345
HG002+HG003+HG004	NovaSeq	20	FALSE	GATK4	genome	AAAAAa	AAAaaa	5659
HG002+HG003+HG004	NovaSeq	20	FALSE	GATK4	genome	AAAAAa	AAaaaa	145
HG002+HG003+HG004	NovaSeq	20	FALSE	GATK4	genome	AAAAAa	Aaaaaa	6
HG002+HG003+HG004	NovaSeq	20	FALSE	GATK4	genome	AAAAAa	aaaaaa	17
HG002+HG003+HG004	NovaSeq	20	FALSE	GATK4	genome	AAAAaa	AAAAAa	268780
HG002+HG003+HG004	NovaSeq	20	FALSE	GATK4	genome	AAAAaa	AAAaaa	228318
HG002+HG003+HG004	NovaSeq	20	FALSE	GATK4	genome	AAAAaa	AAaaaa	14135
HG002+HG003+HG004	NovaSeq	20	FALSE	GATK4	genome	AAAAaa	Aaaaaa	419
HG002+HG003+HG004	NovaSeq	20	FALSE	GATK4	genome	AAAAaa	aaaaaa	52
HG002+HG003+HG004	NovaSeq	20	FALSE	GATK4	genome	AAAaaa	AAAAAa	14886
HG002+HG003+HG004	NovaSeq	20	FALSE	GATK4	genome	AAAaaa	AAAAaa	184232
HG002+HG003+HG004	NovaSeq	20	FALSE	GATK4	genome	AAAaaa	AAaaaa	148326
HG002+HG003+HG004	NovaSeq	20	FALSE	GATK4	genome	AAAaaa	Aaaaaa	9368
HG002+HG003+HG004	NovaSeq	20	FALSE	GATK4	genome	AAAaaa	aaaaaa	158
HG002+HG003+HG004	NovaSeq	20	FALSE	GATK4	genome	AAaaaa	AAAAAa	958
HG002+HG003+HG004	NovaSeq	20	FALSE	GATK4	genome	AAaaaa	AAAAaa	12429
HG002+HG003+HG004	NovaSeq	20	FALSE	GATK4	genome	AAaaaa	AAAaaa	136731
HG002+HG003+HG004	NovaSeq	20	FALSE	GATK4	genome	AAaaaa	Aaaaaa	110179
HG002+HG003+HG004	NovaSeq	20	FALSE	GATK4	genome	AAaaaa	aaaaaa	1116
HG002+HG003+HG004	NovaSeq	20	FALSE	GATK4	genome	Aaaaaa	AAAAAa	85
HG002+HG003+HG004	NovaSeq	20	FALSE	GATK4	genome	Aaaaaa	AAAAaa	574
HG002+HG003+HG004	NovaSeq	20	FALSE	GATK4	genome	Aaaaaa	AAAaaa	4744
HG002+HG003+HG004	NovaSeq	20	FALSE	GATK4	genome	Aaaaaa	AAaaaa	79929
HG002+HG003+HG004	NovaSeq	20	FALSE	GATK4	genome	Aaaaaa	aaaaaa	15164
HG002+HG003+HG004	NovaSeq	20	FALSE	GATK4	genome	aaaaaa	AAAAAa	17
HG002+HG003+HG004	NovaSeq	20	FALSE	GATK4	genome	aaaaaa	AAAAaa	53
HG002+HG003+HG004	NovaSeq	20	FALSE	GATK4	genome	aaaaaa	AAAaaa	131
HG002+HG003+HG004	NovaSeq	20	FALSE	GATK4	genome	aaaaaa	AAaaaa	295
HG002+HG003+HG004	NovaSeq	20	FALSE	GATK4	genome	aaaaaa	Aaaaaa	13601
HG002+HG003+HG004	NovaSeq	20	FALSE	GATK4	notinAllTandemRepeatsandHomopolymers	AAAAAa	AAAAaa	149217
HG002+HG003+HG004	NovaSeq	20	FALSE	GATK4	notinAllTandemRepeatsandHomopolymers	AAAAAa	AAAaaa	4778
HG002+HG003+HG004	NovaSeq	20	FALSE	GATK4	notinAllTandemRepeatsandHomopolymers	AAAAAa	AAaaaa	114
HG002+HG003+HG004	NovaSeq	20	FALSE	GATK4	notinAllTandemRepeatsandHomopolymers	AAAAAa	Aaaaaa	6
HG002+HG003+HG004	NovaSeq	20	FALSE	GATK4	notinAllTandemRepeatsandHomopolymers	AAAAAa	aaaaaa	16
HG002+HG003+HG004	NovaSeq	20	FALSE	GATK4	notinAllTandemRepeatsandHomopolymers	AAAAaa	AAAAAa	241468
HG002+HG003+HG004	NovaSeq	20	FALSE	GATK4	notinAllTandemRepeatsandHomopolymers	AAAAaa	AAAaaa	205434
HG002+HG003+HG004	NovaSeq	20	FALSE	GATK4	notinAllTandemRepeatsandHomopolymers	AAAAaa	AAaaaa	12247
HG002+HG003+HG004	NovaSeq	20	FALSE	GATK4	notinAllTandemRepeatsandHomopolymers	AAAAaa	Aaaaaa	332
HG002+HG003+HG004	NovaSeq	20	FALSE	GATK4	notinAllTandemRepeatsandHomopolymers	AAAAaa	aaaaaa	48
HG002+HG003+HG004	NovaSeq	20	FALSE	GATK4	notinAllTandemRepeatsandHomopolymers	AAAaaa	AAAAAa	13060
HG002+HG003+HG004	NovaSeq	20	FALSE	GATK4	notinAllTandemRepeatsandHomopolymers	AAAaaa	AAAAaa	166176
HG002+HG003+HG004	NovaSeq	20	FALSE	GATK4	notinAllTandemRepeatsandHomopolymers	AAAaaa	AAaaaa	133640
HG002+HG003+HG004	NovaSeq	20	FALSE	GATK4	notinAllTandemRepeatsandHomopolymers	AAAaaa	Aaaaaa	8056
HG002+HG003+HG004	NovaSeq	20	FALSE	GATK4	notinAllTandemRepeatsandHomopolymers	AAAaaa	aaaaaa	124
HG002+HG003+HG004	NovaSeq	20	FALSE	GATK4	notinAllTandemRepeatsandHomopolymers	AAaaaa	AAAAAa	902
HG002+HG003+HG004	NovaSeq	20	FALSE	GATK4	notinAllTandemRepeatsandHomopolymers	AAaaaa	AAAAaa	11114
HG002+HG003+HG004	NovaSeq	20	FALSE	GATK4	notinAllTandemRepeatsandHomopolymers	AAaaaa	AAAaaa	123655
HG002+HG003+HG004	NovaSeq	20	FALSE	GATK4	notinAllTandemRepeatsandHomopolymers	AAaaaa	Aaaaaa	99046
HG002+HG003+HG004	NovaSeq	20	FALSE	GATK4	notinAllTandemRepeatsandHomopolymers	AAaaaa	aaaaaa	915
HG002+HG003+HG004	NovaSeq	20	FALSE	GATK4	notinAllTandemRepeatsandHomopolymers	Aaaaaa	AAAAAa	82
HG002+HG003+HG004	NovaSeq	20	FALSE	GATK4	notinAllTandemRepeatsandHomopolymers	Aaaaaa	AAAAaa	546
HG002+HG003+HG004	NovaSeq	20	FALSE	GATK4	notinAllTandemRepeatsandHomopolymers	Aaaaaa	AAAaaa	4208
HG002+HG003+HG004	NovaSeq	20	FALSE	GATK4	notinAllTandemRepeatsandHomopolymers	Aaaaaa	AAaaaa	72182
HG002+HG003+HG004	NovaSeq	20	FALSE	GATK4	notinAllTandemRepeatsandHomopolymers	Aaaaaa	aaaaaa	13074
HG002+HG003+HG004	NovaSeq	20	FALSE	GATK4	notinAllTandemRepeatsandHomopolymers	aaaaaa	AAAAAa	17
HG002+HG003+HG004	NovaSeq	20	FALSE	GATK4	notinAllTandemRepeatsandHomopolymers	aaaaaa	AAAAaa	52
HG002+HG003+HG004	NovaSeq	20	FALSE	GATK4	notinAllTandemRepeatsandHomopolymers	aaaaaa	AAAaaa	120
HG002+HG003+HG004	NovaSeq	20	FALSE	GATK4	notinAllTandemRepeatsandHomopolymers	aaaaaa	AAaaaa	262
HG002+HG003+HG004	NovaSeq	20	FALSE	GATK4	notinAllTandemRepeatsandHomopolymers	aaaaaa	Aaaaaa	10881
HG002+HG003+HG004	NovaSeq	20	FALSE	GATK4	notinalldifficult	AAAAAa	AAAAaa	130267
HG002+HG003+HG004	NovaSeq	20	FALSE	GATK4	notinalldifficult	AAAAAa	AAAaaa	4047
HG002+HG003+HG004	NovaSeq	20	FALSE	GATK4	notinalldifficult	AAAAAa	AAaaaa	70
HG002+HG003+HG004	NovaSeq	20	FALSE	GATK4	notinalldifficult	AAAAAa	Aaaaaa	2
HG002+HG003+HG004	NovaSeq	20	FALSE	GATK4	notinalldifficult	AAAAAa	aaaaaa	1
HG002+HG003+HG004	NovaSeq	20	FALSE	GATK4	notinalldifficult	AAAAaa	AAAAAa	207176
HG002+HG003+HG004	NovaSeq	20	FALSE	GATK4	notinalldifficult	AAAAaa	AAAaaa	180709
HG002+HG003+HG004	NovaSeq	20	FALSE	GATK4	notinalldifficult	AAAAaa	AAaaaa	10548
HG002+HG003+HG004	NovaSeq	20	FALSE	GATK4	notinalldifficult	AAAAaa	Aaaaaa	249
HG002+HG003+HG004	NovaSeq	20	FALSE	GATK4	notinalldifficult	AAAAaa	aaaaaa	4
HG002+HG003+HG004	NovaSeq	20	FALSE	GATK4	notinalldifficult	AAAaaa	AAAAAa	9389
HG002+HG003+HG004	NovaSeq	20	FALSE	GATK4	notinalldifficult	AAAaaa	AAAAaa	142697
HG002+HG003+HG004	NovaSeq	20	FALSE	GATK4	notinalldifficult	AAAaaa	AAaaaa	117930
HG002+HG003+HG004	NovaSeq	20	FALSE	GATK4	notinalldifficult	AAAaaa	Aaaaaa	6984
HG002+HG003+HG004	NovaSeq	20	FALSE	GATK4	notinalldifficult	AAAaaa	aaaaaa	35
HG002+HG003+HG004	NovaSeq	20	FALSE	GATK4	notinalldifficult	AAaaaa	AAAAAa	192
HG002+HG003+HG004	NovaSeq	20	FALSE	GATK4	notinalldifficult	AAaaaa	AAAAaa	7982
HG002+HG003+HG004	NovaSeq	20	FALSE	GATK4	notinalldifficult	AAaaaa	AAAaaa	106415
HG002+HG003+HG004	NovaSeq	20	FALSE	GATK4	notinalldifficult	AAaaaa	Aaaaaa	87199
HG002+HG003+HG004	NovaSeq	20	FALSE	GATK4	notinalldifficult	AAaaaa	aaaaaa	682
HG002+HG003+HG004	NovaSeq	20	FALSE	GATK4	notinalldifficult	Aaaaaa	AAAAAa	2
HG002+HG003+HG004	NovaSeq	20	FALSE	GATK4	notinalldifficult	Aaaaaa	AAAAaa	63
HG002+HG003+HG004	NovaSeq	20	FALSE	GATK4	notinalldifficult	Aaaaaa	AAAaaa	2695
HG002+HG003+HG004	NovaSeq	20	FALSE	GATK4	notinalldifficult	Aaaaaa	AAaaaa	61342
HG002+HG003+HG004	NovaSeq	20	FALSE	GATK4	notinalldifficult	Aaaaaa	aaaaaa	10993
HG002+HG003+HG004	NovaSeq	20	FALSE	GATK4	notinalldifficult	aaaaaa	AAAAAa	4
HG002+HG003+HG004	NovaSeq	20	FALSE	GATK4	notinalldifficult	aaaaaa	AAAAaa	5
HG002+HG003+HG004	NovaSeq	20	FALSE	GATK4	notinalldifficult	aaaaaa	AAaaaa	3
HG002+HG003+HG004	NovaSeq	20	FALSE	GATK4	notinalldifficult	aaaaaa	Aaaaaa	8570
HG002+HG003+HG004	NovaSeq	20	FALSE	GATK4	notinalllowmapandsegdup	AAAAAa	AAAAaa	156198
HG002+HG003+HG004	NovaSeq	20	FALSE	GATK4	notinalllowmapandsegdup	AAAAAa	AAAaaa	5209
HG002+HG003+HG004	NovaSeq	20	FALSE	GATK4	notinalllowmapandsegdup	AAAAAa	AAaaaa	107
HG002+HG003+HG004	NovaSeq	20	FALSE	GATK4	notinalllowmapandsegdup	AAAAAa	Aaaaaa	2
HG002+HG003+HG004	NovaSeq	20	FALSE	GATK4	notinalllowmapandsegdup	AAAAAa	aaaaaa	4
HG002+HG003+HG004	NovaSeq	20	FALSE	GATK4	notinalllowmapandsegdup	AAAAaa	AAAAAa	249135
HG002+HG003+HG004	NovaSeq	20	FALSE	GATK4	notinalllowmapandsegdup	AAAAaa	AAAaaa	216117
HG002+HG003+HG004	NovaSeq	20	FALSE	GATK4	notinalllowmapandsegdup	AAAAaa	AAaaaa	13188
HG002+HG003+HG004	NovaSeq	20	FALSE	GATK4	notinalllowmapandsegdup	AAAAaa	Aaaaaa	356
HG002+HG003+HG004	NovaSeq	20	FALSE	GATK4	notinalllowmapandsegdup	AAAAaa	aaaaaa	15
HG002+HG003+HG004	NovaSeq	20	FALSE	GATK4	notinalllowmapandsegdup	AAAaaa	AAAAAa	11937
HG002+HG003+HG004	NovaSeq	20	FALSE	GATK4	notinalllowmapandsegdup	AAAaaa	AAAAaa	170494
HG002+HG003+HG004	NovaSeq	20	FALSE	GATK4	notinalllowmapandsegdup	AAAaaa	AAaaaa	140532
HG002+HG003+HG004	NovaSeq	20	FALSE	GATK4	notinalllowmapandsegdup	AAAaaa	Aaaaaa	8803
HG002+HG003+HG004	NovaSeq	20	FALSE	GATK4	notinalllowmapandsegdup	AAAaaa	aaaaaa	77
HG002+HG003+HG004	NovaSeq	20	FALSE	GATK4	notinalllowmapandsegdup	AAaaaa	AAAAAa	382
HG002+HG003+HG004	NovaSeq	20	FALSE	GATK4	notinalllowmapandsegdup	AAaaaa	AAAAaa	10014
HG002+HG003+HG004	NovaSeq	20	FALSE	GATK4	notinalllowmapandsegdup	AAaaaa	AAAaaa	126844
HG002+HG003+HG004	NovaSeq	20	FALSE	GATK4	notinalllowmapandsegdup	AAaaaa	Aaaaaa	104436
HG002+HG003+HG004	NovaSeq	20	FALSE	GATK4	notinalllowmapandsegdup	AAaaaa	aaaaaa	936
HG002+HG003+HG004	NovaSeq	20	FALSE	GATK4	notinalllowmapandsegdup	Aaaaaa	AAAAAa	9
HG002+HG003+HG004	NovaSeq	20	FALSE	GATK4	notinalllowmapandsegdup	Aaaaaa	AAAAaa	93
HG002+HG003+HG004	NovaSeq	20	FALSE	GATK4	notinalllowmapandsegdup	Aaaaaa	AAAaaa	3467
HG002+HG003+HG004	NovaSeq	20	FALSE	GATK4	notinalllowmapandsegdup	Aaaaaa	AAaaaa	73439
HG002+HG003+HG004	NovaSeq	20	FALSE	GATK4	notinalllowmapandsegdup	Aaaaaa	aaaaaa	13838
HG002+HG003+HG004	NovaSeq	20	FALSE	GATK4	notinalllowmapandsegdup	aaaaaa	AAAAAa	4
HG002+HG003+HG004	NovaSeq	20	FALSE	GATK4	notinalllowmapandsegdup	aaaaaa	AAAAaa	5
HG002+HG003+HG004	NovaSeq	20	FALSE	GATK4	notinalllowmapandsegdup	aaaaaa	AAAaaa	5
HG002+HG003+HG004	NovaSeq	20	FALSE	GATK4	notinalllowmapandsegdup	aaaaaa	AAaaaa	37
HG002+HG003+HG004	NovaSeq	20	FALSE	GATK4	notinalllowmapandsegdup	aaaaaa	Aaaaaa	11869
HG002+HG003+HG004	NovaSeq	20	FALSE	Octopus	AllTandemRepeatsandHomopolymers	AAAAAa	AAAAaa	15962
HG002+HG003+HG004	NovaSeq	20	FALSE	Octopus	AllTandemRepeatsandHomopolymers	AAAAAa	AAAaaa	661
HG002+HG003+HG004	NovaSeq	20	FALSE	Octopus	AllTandemRepeatsandHomopolymers	AAAAAa	AAaaaa	25
HG002+HG003+HG004	NovaSeq	20	FALSE	Octopus	AllTandemRepeatsandHomopolymers	AAAAAa	Aaaaaa	3
HG002+HG003+HG004	NovaSeq	20	FALSE	Octopus	AllTandemRepeatsandHomopolymers	AAAAAa	aaaaaa	1
HG002+HG003+HG004	NovaSeq	20	FALSE	Octopus	AllTandemRepeatsandHomopolymers	AAAAaa	AAAAAa	18117
HG002+HG003+HG004	NovaSeq	20	FALSE	Octopus	AllTandemRepeatsandHomopolymers	AAAAaa	AAAaaa	20731
HG002+HG003+HG004	NovaSeq	20	FALSE	Octopus	AllTandemRepeatsandHomopolymers	AAAAaa	AAaaaa	1314
HG002+HG003+HG004	NovaSeq	20	FALSE	Octopus	AllTandemRepeatsandHomopolymers	AAAAaa	Aaaaaa	46
HG002+HG003+HG004	NovaSeq	20	FALSE	Octopus	AllTandemRepeatsandHomopolymers	AAAAaa	aaaaaa	5
HG002+HG003+HG004	NovaSeq	20	FALSE	Octopus	AllTandemRepeatsandHomopolymers	AAAaaa	AAAAAa	690
HG002+HG003+HG004	NovaSeq	20	FALSE	Octopus	AllTandemRepeatsandHomopolymers	AAAaaa	AAAAaa	13515
HG002+HG003+HG004	NovaSeq	20	FALSE	Octopus	AllTandemRepeatsandHomopolymers	AAAaaa	AAaaaa	13412
HG002+HG003+HG004	NovaSeq	20	FALSE	Octopus	AllTandemRepeatsandHomopolymers	AAAaaa	Aaaaaa	724
HG002+HG003+HG004	NovaSeq	20	FALSE	Octopus	AllTandemRepeatsandHomopolymers	AAAaaa	aaaaaa	25
HG002+HG003+HG004	NovaSeq	20	FALSE	Octopus	AllTandemRepeatsandHomopolymers	AAaaaa	AAAAAa	23
HG002+HG003+HG004	NovaSeq	20	FALSE	Octopus	AllTandemRepeatsandHomopolymers	AAaaaa	AAAAaa	567
HG002+HG003+HG004	NovaSeq	20	FALSE	Octopus	AllTandemRepeatsandHomopolymers	AAaaaa	AAAaaa	9860
HG002+HG003+HG004	NovaSeq	20	FALSE	Octopus	AllTandemRepeatsandHomopolymers	AAaaaa	Aaaaaa	9028
HG002+HG003+HG004	NovaSeq	20	FALSE	Octopus	AllTandemRepeatsandHomopolymers	AAaaaa	aaaaaa	164
HG002+HG003+HG004	NovaSeq	20	FALSE	Octopus	AllTandemRepeatsandHomopolymers	Aaaaaa	AAAAAa	2
HG002+HG003+HG004	NovaSeq	20	FALSE	Octopus	AllTandemRepeatsandHomopolymers	Aaaaaa	AAAAaa	9
HG002+HG003+HG004	NovaSeq	20	FALSE	Octopus	AllTandemRepeatsandHomopolymers	Aaaaaa	AAAaaa	236
HG002+HG003+HG004	NovaSeq	20	FALSE	Octopus	AllTandemRepeatsandHomopolymers	Aaaaaa	AAaaaa	5680
HG002+HG003+HG004	NovaSeq	20	FALSE	Octopus	AllTandemRepeatsandHomopolymers	Aaaaaa	aaaaaa	2295
HG002+HG003+HG004	NovaSeq	20	FALSE	Octopus	AllTandemRepeatsandHomopolymers	aaaaaa	AAAAAa	1
HG002+HG003+HG004	NovaSeq	20	FALSE	Octopus	AllTandemRepeatsandHomopolymers	aaaaaa	AAAAaa	2
HG002+HG003+HG004	NovaSeq	20	FALSE	Octopus	AllTandemRepeatsandHomopolymers	aaaaaa	AAAaaa	1
HG002+HG003+HG004	NovaSeq	20	FALSE	Octopus	AllTandemRepeatsandHomopolymers	aaaaaa	AAaaaa	15
HG002+HG003+HG004	NovaSeq	20	FALSE	Octopus	AllTandemRepeatsandHomopolymers	aaaaaa	Aaaaaa	1715
HG002+HG003+HG004	NovaSeq	20	FALSE	Octopus	alldifficult	AAAAAa	AAAAaa	33401
HG002+HG003+HG004	NovaSeq	20	FALSE	Octopus	alldifficult	AAAAAa	AAAaaa	1206
HG002+HG003+HG004	NovaSeq	20	FALSE	Octopus	alldifficult	AAAAAa	AAaaaa	68
HG002+HG003+HG004	NovaSeq	20	FALSE	Octopus	alldifficult	AAAAAa	Aaaaaa	10
HG002+HG003+HG004	NovaSeq	20	FALSE	Octopus	alldifficult	AAAAAa	aaaaaa	32
HG002+HG003+HG004	NovaSeq	20	FALSE	Octopus	alldifficult	AAAAaa	AAAAAa	39371
HG002+HG003+HG004	NovaSeq	20	FALSE	Octopus	alldifficult	AAAAaa	AAAaaa	43493
HG002+HG003+HG004	NovaSeq	20	FALSE	Octopus	alldifficult	AAAAaa	AAaaaa	2437
HG002+HG003+HG004	NovaSeq	20	FALSE	Octopus	alldifficult	AAAAaa	Aaaaaa	88
HG002+HG003+HG004	NovaSeq	20	FALSE	Octopus	alldifficult	AAAAaa	aaaaaa	60
HG002+HG003+HG004	NovaSeq	20	FALSE	Octopus	alldifficult	AAAaaa	AAAAAa	1945
HG002+HG003+HG004	NovaSeq	20	FALSE	Octopus	alldifficult	AAAaaa	AAAAaa	31901
HG002+HG003+HG004	NovaSeq	20	FALSE	Octopus	alldifficult	AAAaaa	AAaaaa	27143
HG002+HG003+HG004	NovaSeq	20	FALSE	Octopus	alldifficult	AAAaaa	Aaaaaa	1327
HG002+HG003+HG004	NovaSeq	20	FALSE	Octopus	alldifficult	AAAaaa	aaaaaa	114
HG002+HG003+HG004	NovaSeq	20	FALSE	Octopus	alldifficult	AAaaaa	AAAAAa	260
HG002+HG003+HG004	NovaSeq	20	FALSE	Octopus	alldifficult	AAaaaa	AAAAaa	2108
HG002+HG003+HG004	NovaSeq	20	FALSE	Octopus	alldifficult	AAaaaa	AAAaaa	23905
HG002+HG003+HG004	NovaSeq	20	FALSE	Octopus	alldifficult	AAaaaa	Aaaaaa	18606
HG002+HG003+HG004	NovaSeq	20	FALSE	Octopus	alldifficult	AAaaaa	aaaaaa	419
HG002+HG003+HG004	NovaSeq	20	FALSE	Octopus	alldifficult	Aaaaaa	AAAAAa	58
HG002+HG003+HG004	NovaSeq	20	FALSE	Octopus	alldifficult	Aaaaaa	AAAAaa	235
HG002+HG003+HG004	NovaSeq	20	FALSE	Octopus	alldifficult	Aaaaaa	AAAaaa	1047
HG002+HG003+HG004	NovaSeq	20	FALSE	Octopus	alldifficult	Aaaaaa	AAaaaa	14385
HG002+HG003+HG004	NovaSeq	20	FALSE	Octopus	alldifficult	Aaaaaa	aaaaaa	4445
HG002+HG003+HG004	NovaSeq	20	FALSE	Octopus	alldifficult	aaaaaa	AAAAAa	36
HG002+HG003+HG004	NovaSeq	20	FALSE	Octopus	alldifficult	aaaaaa	AAAAaa	34
HG002+HG003+HG004	NovaSeq	20	FALSE	Octopus	alldifficult	aaaaaa	AAAaaa	132
HG002+HG003+HG004	NovaSeq	20	FALSE	Octopus	alldifficult	aaaaaa	AAaaaa	253
HG002+HG003+HG004	NovaSeq	20	FALSE	Octopus	alldifficult	aaaaaa	Aaaaaa	3709
HG002+HG003+HG004	NovaSeq	20	FALSE	Octopus	alllowmapandsegdup	AAAAAa	AAAAaa	9447
HG002+HG003+HG004	NovaSeq	20	FALSE	Octopus	alllowmapandsegdup	AAAAAa	AAAaaa	360
HG002+HG003+HG004	NovaSeq	20	FALSE	Octopus	alllowmapandsegdup	AAAAAa	AAaaaa	38
HG002+HG003+HG004	NovaSeq	20	FALSE	Octopus	alllowmapandsegdup	AAAAAa	Aaaaaa	7
HG002+HG003+HG004	NovaSeq	20	FALSE	Octopus	alllowmapandsegdup	AAAAAa	aaaaaa	30
HG002+HG003+HG004	NovaSeq	20	FALSE	Octopus	alllowmapandsegdup	AAAAaa	AAAAAa	11951
HG002+HG003+HG004	NovaSeq	20	FALSE	Octopus	alllowmapandsegdup	AAAAaa	AAAaaa	11287
HG002+HG003+HG004	NovaSeq	20	FALSE	Octopus	alllowmapandsegdup	AAAAaa	AAaaaa	686
HG002+HG003+HG004	NovaSeq	20	FALSE	Octopus	alllowmapandsegdup	AAAAaa	Aaaaaa	37
HG002+HG003+HG004	NovaSeq	20	FALSE	Octopus	alllowmapandsegdup	AAAAaa	aaaaaa	47
HG002+HG003+HG004	NovaSeq	20	FALSE	Octopus	alllowmapandsegdup	AAAaaa	AAAAAa	1028
HG002+HG003+HG004	NovaSeq	20	FALSE	Octopus	alllowmapandsegdup	AAAaaa	AAAAaa	11203
HG002+HG003+HG004	NovaSeq	20	FALSE	Octopus	alllowmapandsegdup	AAAaaa	AAaaaa	6859
HG002+HG003+HG004	NovaSeq	20	FALSE	Octopus	alllowmapandsegdup	AAAaaa	Aaaaaa	330
HG002+HG003+HG004	NovaSeq	20	FALSE	Octopus	alllowmapandsegdup	AAAaaa	aaaaaa	82
HG002+HG003+HG004	NovaSeq	20	FALSE	Octopus	alllowmapandsegdup	AAaaaa	AAAAAa	214
HG002+HG003+HG004	NovaSeq	20	FALSE	Octopus	alllowmapandsegdup	AAaaaa	AAAAaa	1275
HG002+HG003+HG004	NovaSeq	20	FALSE	Octopus	alllowmapandsegdup	AAaaaa	AAAaaa	8421
HG002+HG003+HG004	NovaSeq	20	FALSE	Octopus	alllowmapandsegdup	AAaaaa	Aaaaaa	4565
HG002+HG003+HG004	NovaSeq	20	FALSE	Octopus	alllowmapandsegdup	AAaaaa	aaaaaa	195
HG002+HG003+HG004	NovaSeq	20	FALSE	Octopus	alllowmapandsegdup	Aaaaaa	AAAAAa	57
HG002+HG003+HG004	NovaSeq	20	FALSE	Octopus	alllowmapandsegdup	Aaaaaa	AAAAaa	227
HG002+HG003+HG004	NovaSeq	20	FALSE	Octopus	alllowmapandsegdup	Aaaaaa	AAAaaa	741
HG002+HG003+HG004	NovaSeq	20	FALSE	Octopus	alllowmapandsegdup	Aaaaaa	AAaaaa	5508
HG002+HG003+HG004	NovaSeq	20	FALSE	Octopus	alllowmapandsegdup	Aaaaaa	aaaaaa	1413
HG002+HG003+HG004	NovaSeq	20	FALSE	Octopus	alllowmapandsegdup	aaaaaa	AAAAAa	35
HG002+HG003+HG004	NovaSeq	20	FALSE	Octopus	alllowmapandsegdup	aaaaaa	AAAAaa	33
HG002+HG003+HG004	NovaSeq	20	FALSE	Octopus	alllowmapandsegdup	aaaaaa	AAAaaa	132
HG002+HG003+HG004	NovaSeq	20	FALSE	Octopus	alllowmapandsegdup	aaaaaa	AAaaaa	244
HG002+HG003+HG004	NovaSeq	20	FALSE	Octopus	alllowmapandsegdup	aaaaaa	Aaaaaa	1450
HG002+HG003+HG004	NovaSeq	20	FALSE	Octopus	genome	AAAAAa	AAAAaa	152976
HG002+HG003+HG004	NovaSeq	20	FALSE	Octopus	genome	AAAAAa	AAAaaa	3860
HG002+HG003+HG004	NovaSeq	20	FALSE	Octopus	genome	AAAAAa	AAaaaa	124
[truncated: 12,393 more rows]
